# Supplementary material for: Rate of elongation by RNA polymerase II is associated with specific gene features and epigenetic modifications
Source: HighWire-hosted journal article supplement (doi:10.1101/gr.171405.113), 2014-04-08
Supplement: Supplemental_Fig1.pdf [file Supplemental_Fig1.pdf]

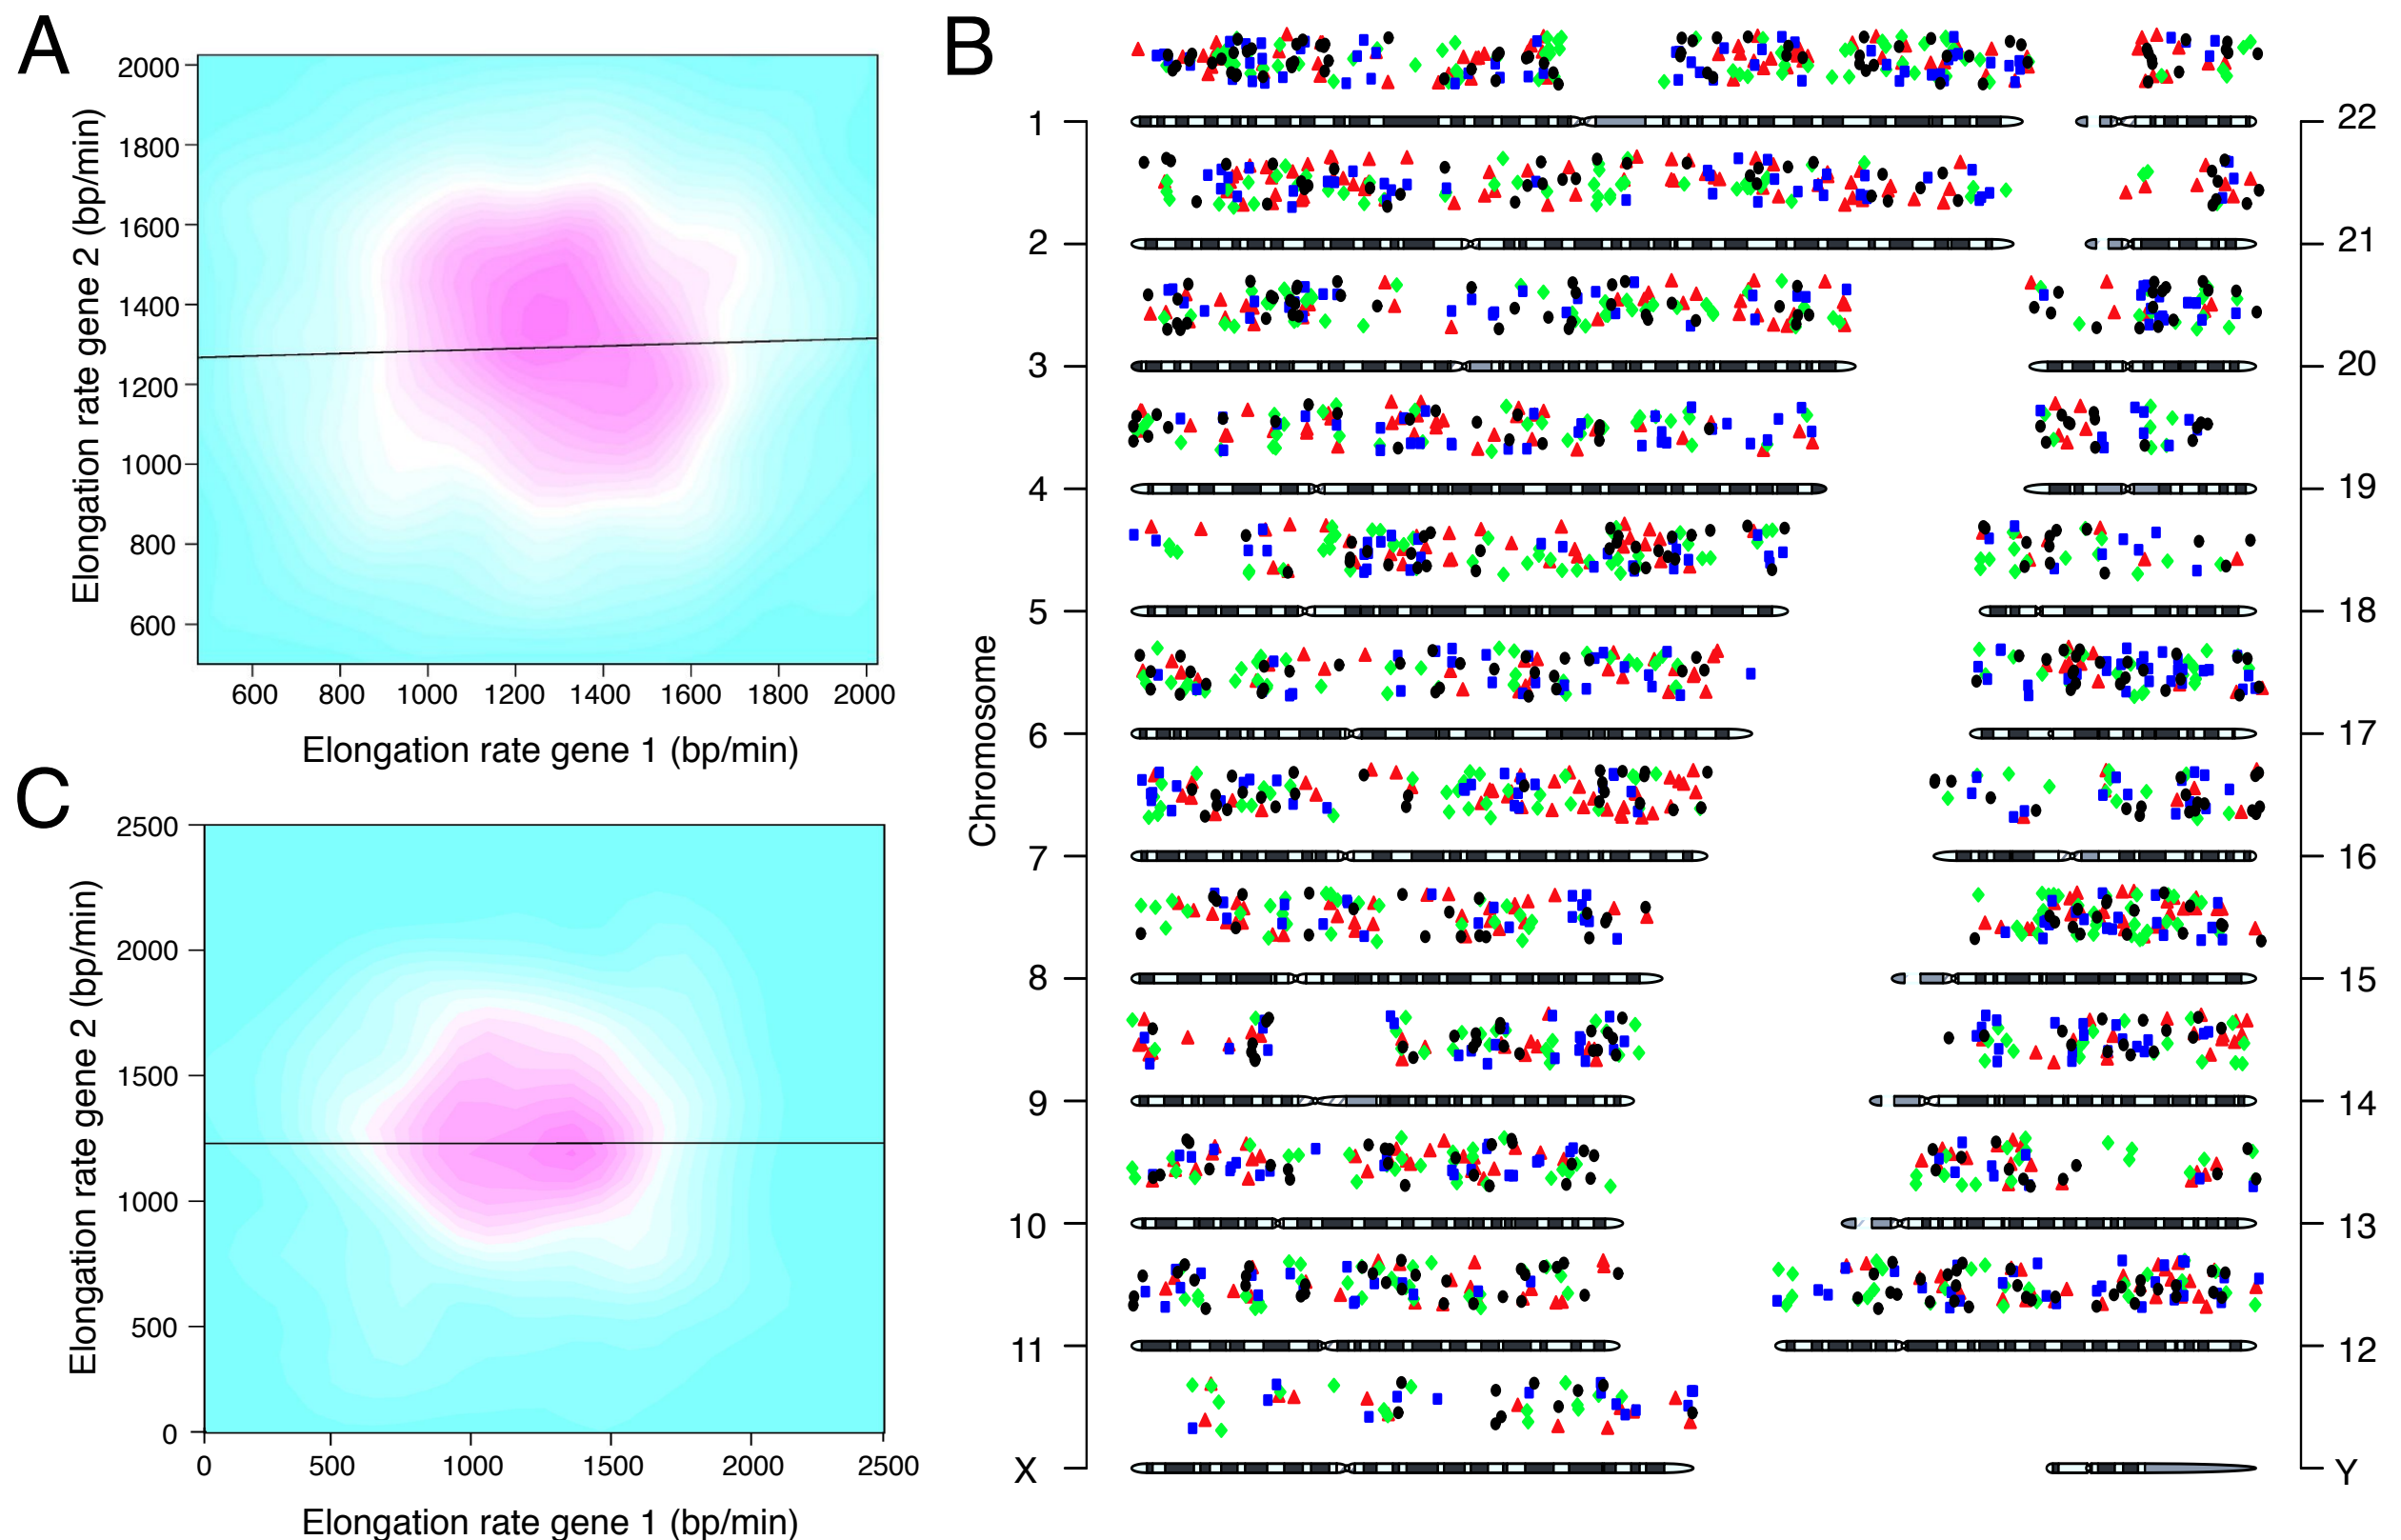

**Supplemental Figure 1.** Transcription elongation rates in K562 cells are not related to two- or three-dimensional localization. (A) Correlation between the elongation rate of a particular gene and the elongation rate of its nearest expressing neighbor. Data point frequency illustrated by a colored contour plot where solid line indicates a linear regression model. (B) Elongation rates of genes in relationship their two-dimensional chromosomal location. Genes were divided into four equal-sized groups according to ranked elongation rates (from slowest to fastest: black circles, blue squares, green diamonds, red triangles) and their chromosomal location are denoted for each chromosome. (C) Correlation between elongation rates and three-dimensional association using ChIA-PET data for K562 cells from ENCODE. Data point frequency illustrated by a colored contour plot where solid line indicates a linear regression model.
