# Supplementary material for: Rate of elongation by RNA polymerase II is associated with specific gene features and epigenetic modifications
Source: HighWire-hosted journal article supplement (doi:10.1101/gr.171405.113), 2014-04-08
Supplement: Supplemental_Fig2.pdf [file Supplemental_Fig2.pdf]

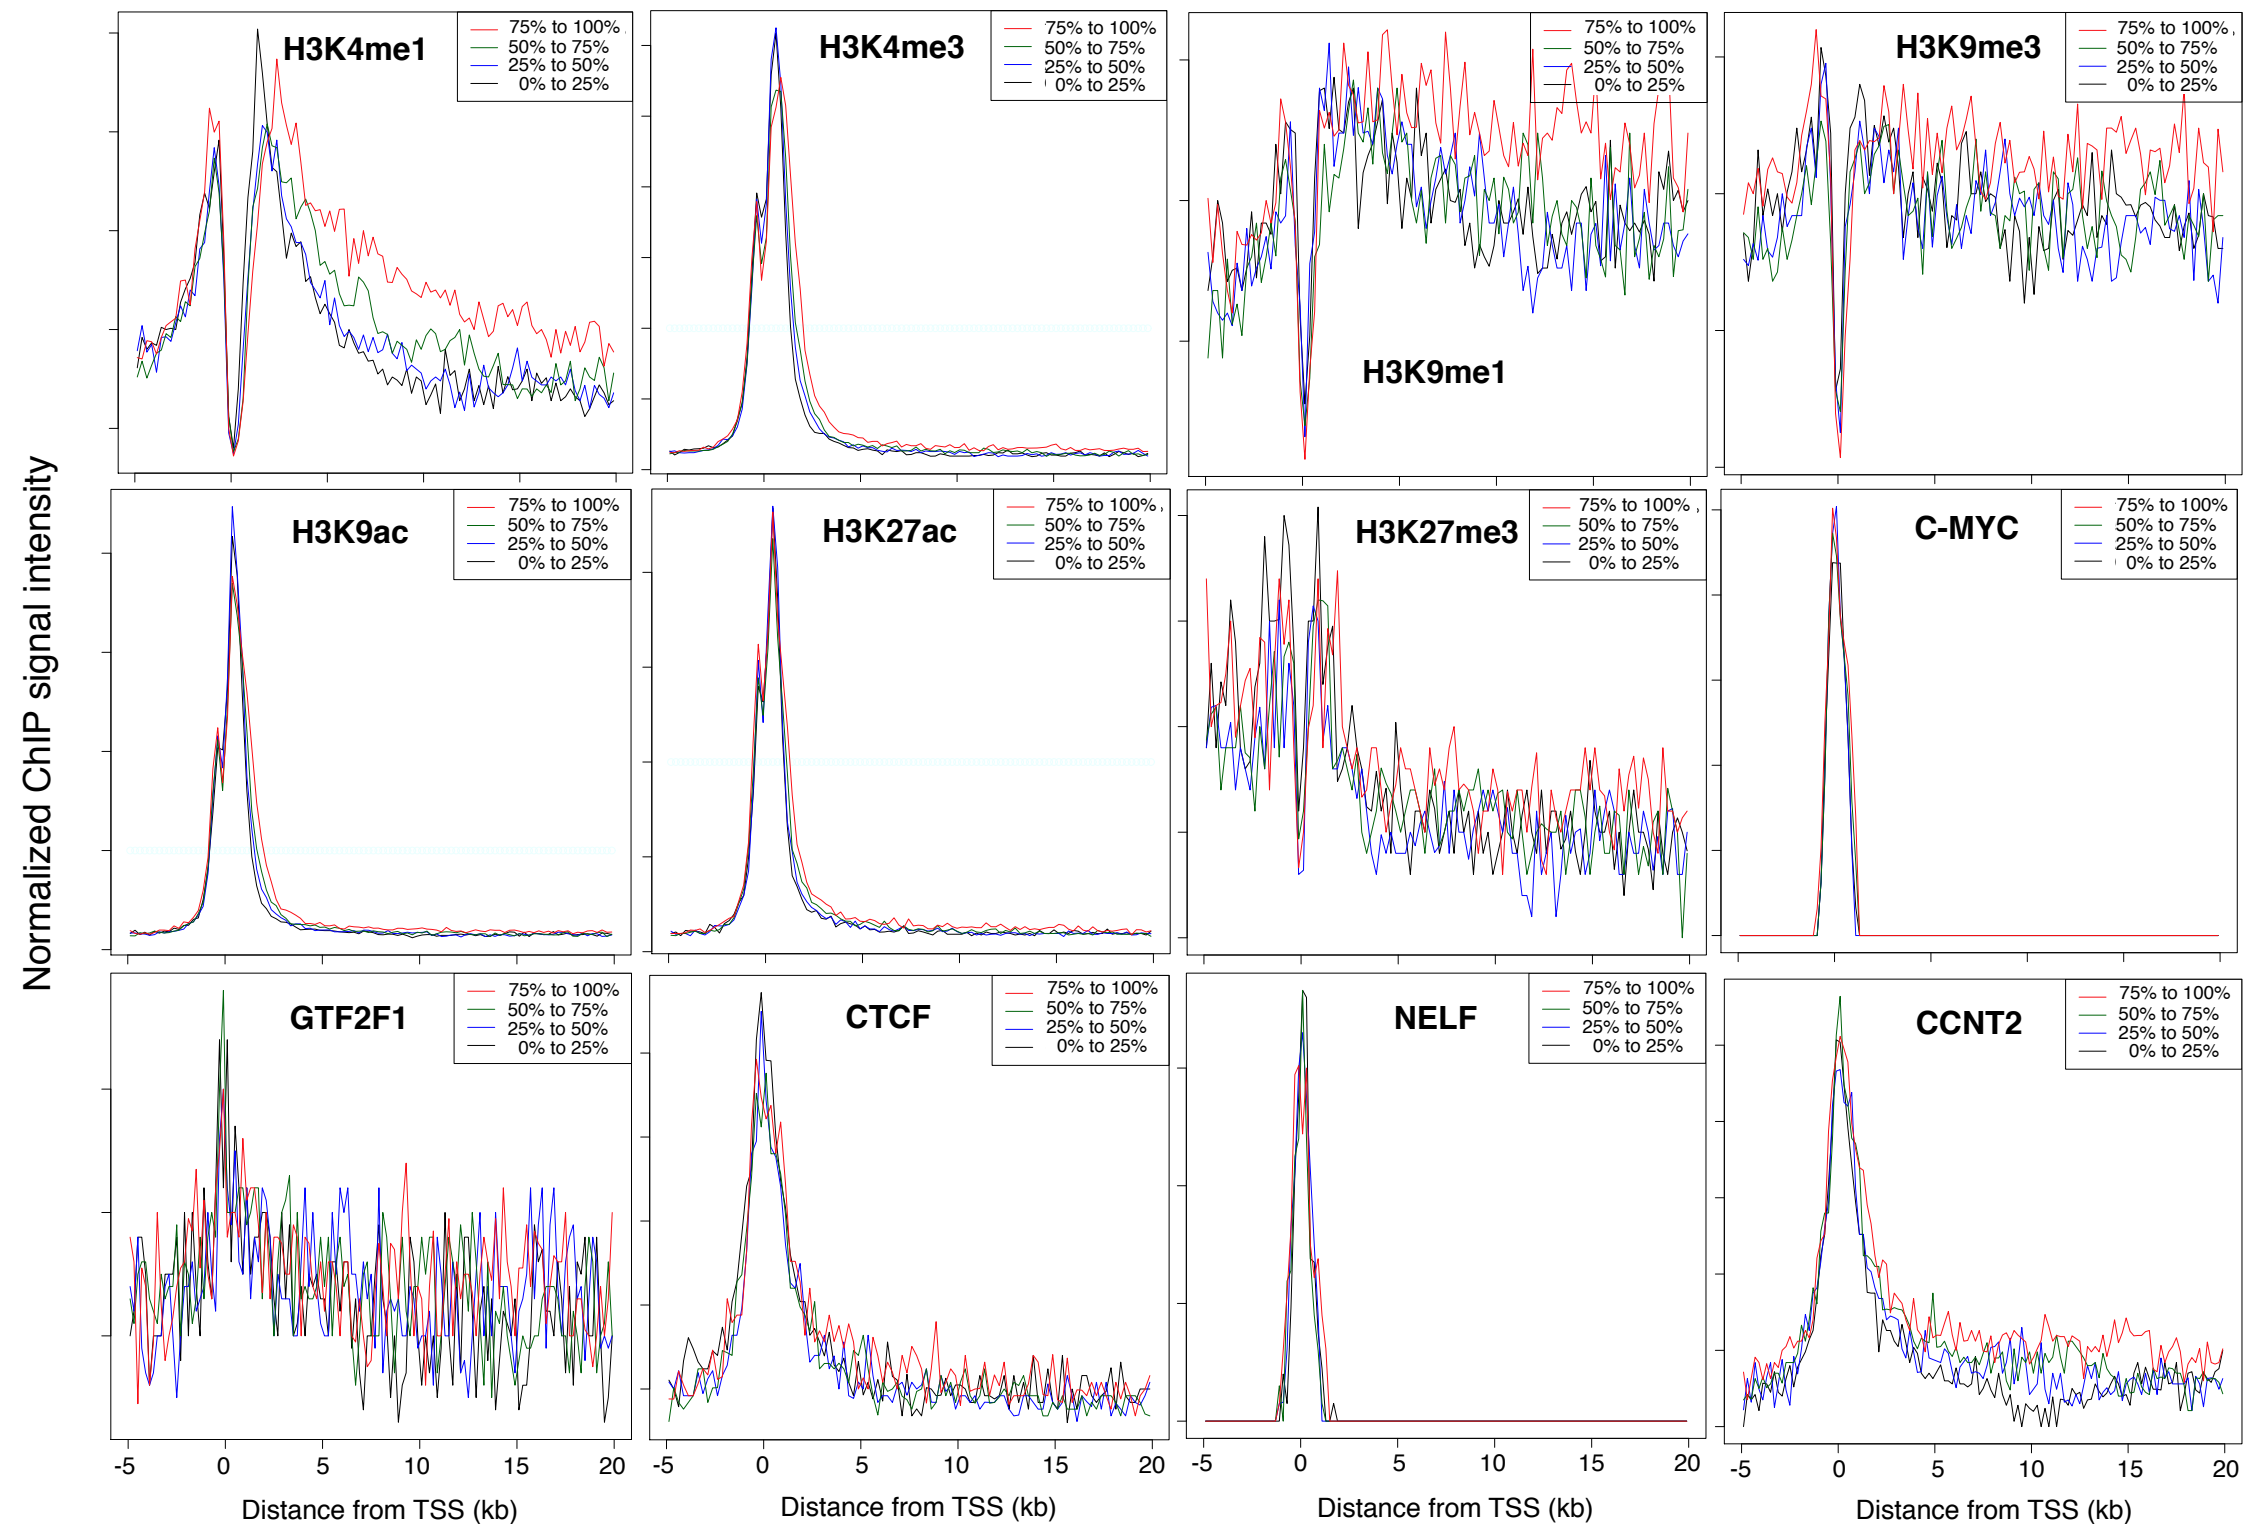

**Supplemental Figure 2.** Comparisons between elongation rate and histone modification or transcription factor binding. Genes expressed in K562 cells were ranked according to elongation rate and placed into four equal-sized groups (from fastest to slowest: red, green, blue, black). ChIP-Seq signal was obtained from ENCODE and median binned values for each group were plotted as indicated.
