# Supplementary material for: Rate of elongation by RNA polymerase II is associated with specific gene features and epigenetic modifications
Source: HighWire-hosted journal article supplement (doi:10.1101/gr.171405.113), 2014-04-08
Supplement: Supplemental_Table1.xlsx [file Supplemental_Table1.xlsx]

## Sheet: Sheet1
Chromosome	Start (analysis region)	End (analysis region)	Strand	Ensembl Transcript ID	Ensembl Gene ID	Gene Symbol	Ensembl Biotype	HF1 Elongation Rate (bp/min)	HF1 Expression (RPKM)	CS-B Elongation Rate (bp/min)	CS-B Expression (RPKM)	TM Elongation Rate (bp/min)	TM Expression (RPKM)	K562 Elongation Rate (bp/min)	K562 Expression (RPKM)	MCF-7 Elongation Rate (bp/min)	MCF-7 Expression (RPKM)
chr1	6845384	6885384	+	ENST00000303635	ENSG00000171735	CAMTA1	protein_coding	NA	NA	NA	NA	NA	NA	1175	0.74228	1850	0.862294
chr1	8445272	8485272	-	ENST00000488215	ENSG00000142599	RERE	protein_coding	NA	NA	NA	NA	1925	4.54703	NA	NA	NA	NA
chr1	8723278	8763278	-	ENST00000468247	ENSG00000142599	RERE	protein_coding	NA	NA	NA	NA	1375	0.705664	NA	NA	1475	1.39636
chr1	8837702	8877702	-	ENST00000400908	ENSG00000142599	RERE	protein_coding	NA	NA	NA	NA	NA	NA	1125	2.0841	NA	NA
chr1	10003486	10043486	+	ENST00000377205	ENSG00000173614	NMNAT1	protein_coding	NA	NA	NA	NA	NA	NA	750	0.749418	NA	NA
chr1	15272415	15312415	+	ENST00000400797	ENSG00000189337	KAZN	protein_coding	NA	NA	NA	NA	825	0.779692	NA	NA	NA	NA
chr1	21073181	21113181	-	ENST00000312239	ENSG00000127483	HP1BP3	protein_coding	NA	NA	1600	2.77738	1775	4.53457	1600	7.52609	NA	NA
chr1	22070099	22110099	-	ENST00000308271	ENSG00000090686	USP48	protein_coding	NA	NA	NA	NA	1875	1.3397	1525	1.56979	NA	NA
chr1	22778344	22818344	+	ENST00000404138	ENSG00000184677	ZBTB40	protein_coding	NA	NA	NA	NA	1575	0.511169	NA	NA	1300	0.994502
chr1	23455351	23495351	-	ENST00000418342	ENSG00000169641	LUZP1	protein_coding	NA	NA	NA	NA	NA	NA	1600	0.713731	2050	0.589698
chr1	26560691	26600691	+	ENST00000476272	ENSG00000130695	CEP85	protein_coding	NA	NA	NA	NA	NA	NA	1425	2.09767	NA	NA
chr1	27022524	27062524	+	ENST00000324856	ENSG00000117713	ARID1A	protein_coding	NA	NA	1100	1.21422	NA	NA	1225	5.24145	NA	NA
chr1	27441401	27481401	-	ENST00000263980	ENSG00000090020	SLC9A1	protein_coding	NA	NA	NA	NA	1575	0.672043	975	0.820791	NA	NA
chr1	28764682	28804682	+	ENST00000373836	ENSG00000204138	PHACTR4	protein_coding	NA	NA	NA	NA	1025	1.06101	NA	NA	NA	NA
chr1	28929578	28969578	-	ENST00000373824	ENSG00000120656	TAF12	protein_coding	NA	NA	NA	NA	NA	NA	750	0.913576	NA	NA
chr1	28995244	29035244	+	ENST00000373816	ENSG00000162419	GMEB1	protein_coding	NA	NA	NA	NA	NA	NA	1300	0.622206	NA	NA
chr1	29213603	29253603	+	ENST00000356093	ENSG00000159023	EPB41	protein_coding	NA	NA	NA	NA	NA	NA	775	2.4481	NA	NA
chr1	31427906	31467906	-	ENST00000498419	ENSG00000134644	PUM1	protein_coding	NA	NA	375	3.31934	NA	NA	NA	NA	NA	NA
chr1	33005028	33045028	+	ENST00000373510	ENSG00000160062	ZBTB8A	protein_coding	NA	NA	NA	NA	NA	NA	NA	NA	1250	0.543011
chr1	33243754	33283754	-	ENST00000373477	ENSG00000134684	YARS	protein_coding	NA	NA	1175	0.964247	1300	1.61043	1225	5.65835	1300	1.18921
chr1	34591443	34631443	-	ENST00000241312	ENSG00000121904	CSMD2	protein_coding	NA	NA	800	0.525866	NA	NA	NA	NA	NA	NA
chr1	35285336	35325336	-	ENST00000426886	ENSG00000163866	C1orf212	protein_coding	NA	NA	750	0.517572	NA	NA	NA	NA	NA	NA
chr1	36195568	36235568	-	ENST00000251195	ENSG00000092853	CLSPN	protein_coding	NA	NA	NA	NA	1050	0.590004	975	2.26673	NA	NA
chr1	36335409	36375409	+	ENST00000373206	ENSG00000092847	EIF2C1	protein_coding	NA	NA	NA	NA	NA	NA	1275	0.84808	NA	NA
chr1	36348810	36388810	+	ENST00000373204	ENSG00000092847	EIF2C1	protein_coding	NA	NA	NA	NA	NA	NA	NA	NA	1600	0.588934
chr1	37459730	37499730	-	ENST00000373093	ENSG00000163873	GRIK3	protein_coding	NA	NA	NA	NA	NA	NA	NA	NA	1650	0.617514
chr1	39669918	39709918	+	ENST00000564288	ENSG00000127603	MACF1	protein_coding	NA	NA	NA	NA	1300	1.09347	NA	NA	NA	NA
chr1	40627045	40667045	+	ENST00000372771	ENSG00000117000	RLF	protein_coding	NA	NA	NA	NA	2075	2.294	1575	1.12056	2375	0.965922
chr1	42761548	42801548	-	ENST00000372573	ENSG00000198815	FOXJ3	protein_coding	NA	NA	NA	NA	NA	NA	1675	1.11342	2100	1.13587
chr1	45412282	45452282	-	ENST00000360403	ENSG00000070785	EIF2B3	protein_coding	NA	NA	NA	NA	2425	0.507186	600	0.778107	NA	NA
chr1	46379260	46419260	+	ENST00000372008	ENSG00000086015	MAST2	protein_coding	NA	NA	NA	NA	3325	1.33174	NA	NA	NA	NA
chr1	46558708	46598708	-	ENST00000420542	ENSG00000117461	PIK3R3	protein_coding	NA	NA	NA	NA	NA	NA	1000	0.518504	2125	4.45143
chr1	51385935	51425935	-	ENST00000396153	ENSG00000185104	FAF1	protein_coding	NA	NA	NA	NA	NA	NA	1700	2.09123	NA	NA
chr1	51756232	51796232	-	ENST00000451380	ENSG00000085831	TTC39A	protein_coding	NA	NA	NA	NA	NA	NA	NA	NA	1450	1.31891
chr1	51983981	52023981	+	ENST00000415031	ENSG00000227070	RP11-191G24.1	processed_transcript	NA	NA	NA	NA	NA	NA	750	2.44796	900	0.89011
chr1	52179675	52219675	+	ENST00000484890	ENSG00000117859	OSBPL9	protein_coding	NA	NA	NA	NA	NA	NA	125	2.50534	NA	NA
chr1	53308183	53348183	+	ENST00000371532	ENSG00000203995	ZYG11A	protein_coding	NA	NA	NA	NA	NA	NA	375	0.970534	1550	0.718524
chr1	53392901	53432901	+	ENST00000371514	ENSG00000116171	SCP2	protein_coding	NA	NA	NA	NA	1700	0.583929	NA	NA	NA	NA
chr1	54832092	54872092	-	ENST00000371320	ENSG00000157216	SSBP3	protein_coding	NA	NA	1000	0.644028	NA	NA	NA	NA	1025	0.651002
chr1	61066163	61106163	-	ENST00000439156	ENSG00000226476	RP11-776H12.1	lincRNA	NA	NA	NA	NA	NA	NA	1425	1.14057	NA	NA
chr1	61542946	61582946	+	ENST00000407417	ENSG00000162599	NFIA	protein_coding	NA	NA	NA	NA	NA	NA	NA	NA	1825	1.06257
chr1	62151095	62191095	-	ENST00000294613	ENSG00000162604	TM2D1	protein_coding	NA	NA	800	0.625318	NA	NA	1100	0.904199	1775	0.66202
chr1	62208149	62248149	+	ENST00000371158	ENSG00000132849	INADL	protein_coding	NA	NA	NA	NA	NA	NA	NA	NA	1700	1.82571
chr1	63949173	63989173	-	ENST00000489099	ENSG00000142856	ITGB3BP	protein_coding	NA	NA	NA	NA	NA	NA	1100	0.824709	NA	NA
chr1	65991372	66031372	+	ENST00000462765	ENSG00000116678	LEPR	protein_coding	NA	NA	NA	NA	NA	NA	1225	0.784824	NA	NA
chr1	66258197	66298197	+	ENST00000329654	ENSG00000184588	PDE4B	protein_coding	NA	NA	1250	1.08725	NA	NA	NA	NA	NA	NA
chr1	67350570	67390570	-	ENST00000431318	ENSG00000152763	WDR78	protein_coding	NA	NA	NA	NA	NA	NA	1200	0.550413	NA	NA
chr1	67673299	67713299	+	ENST00000425614	ENSG00000162594	IL23R	protein_coding	NA	NA	NA	NA	NA	NA	1425	1.02232	NA	NA
chr1	72708417	72748417	-	ENST00000357731	ENSG00000172260	NEGR1	protein_coding	NA	NA	675	0.797406	1725	0.534533	NA	NA	NA	NA
chr1	77333126	77373126	+	ENST00000477717	ENSG00000117069	ST6GALNAC5	protein_coding	NA	NA	700	2.09441	1650	1.4338	NA	NA	NA	NA
chr1	77645115	77685115	-	ENST00000445065	ENSG00000142892	PIGK	protein_coding	NA	NA	NA	NA	1650	0.676115	NA	NA	NA	NA
chr1	77747736	77787736	+	ENST00000354567	ENSG00000154027	AK5	protein_coding	NA	NA	1000	2.16193	1625	2.66312	NA	NA	NA	NA
chr1	78109104	78149104	-	ENST00000370798	ENSG00000036549	ZZZ3	protein_coding	NA	NA	1650	2.9923	1375	4.92661	NA	NA	1225	2.94293
chr1	78185537	78225537	-	ENST00000370792	ENSG00000077254	USP33	protein_coding	NA	NA	1300	1.93766	2275	2.61583	1300	2.21607	1300	1.63307
chr1	78245309	78285309	+	ENST00000370791	ENSG00000180488	FAM73A	protein_coding	NA	NA	1175	0.750985	NA	NA	NA	NA	1325	0.556319
chr1	82266082	82306082	+	ENST00000319517	ENSG00000117114	LPHN2	protein_coding	NA	NA	1550	1.4113	NA	NA	NA	NA	NA	NA
chr1	85626729	85666729	-	ENST00000341460	ENSG00000097096	SYDE2	protein_coding	NA	NA	NA	NA	NA	NA	1325	0.55671	2450	6.96381
chr1	85890827	85930827	-	ENST00000539042	ENSG00000153904	DDAH1	protein_coding	NA	NA	NA	NA	1775	3.70486	NA	NA	1750	0.706525
chr1	87340107	87380107	-	ENST00000469566	ENSG00000183291	RP4-604K5.1	protein_coding	NA	NA	1275	0.855304	NA	NA	1350	1.70904	1350	1.06846
chr1	89110887	89150887	-	ENST00000458097	ENSG00000237505	RP11-76N22.2	lincRNA	NA	NA	NA	NA	NA	NA	1000	0.63522	NA	NA
chr1	89990395	90030395	+	ENST00000449440	ENSG00000197147	LRRC8B	protein_coding	NA	NA	NA	NA	NA	NA	1275	3.79831	1800	1.09409
chr1	90286573	90326573	+	ENST00000525774	ENSG00000171492	LRRC8D	protein_coding	NA	NA	NA	NA	NA	NA	1425	4.08576	NA	NA
chr1	90308607	90348607	+	ENST00000414841	ENSG00000171492	LRRC8D	protein_coding	NA	NA	1300	0.516103	1500	2.34571	NA	NA	NA	NA
chr1	92724544	92764544	-	ENST00000534881	ENSG00000174842	GLMN	protein_coding	NA	NA	NA	NA	NA	NA	1025	0.941846	NA	NA
chr1	93210663	93250663	-	ENST00000474806	ENSG00000067208	EVI5	protein_coding	NA	NA	NA	NA	2100	0.55507	NA	NA	NA	NA
chr1	93544792	93584792	+	ENST00000545708	ENSG00000143033	MTF2	protein_coding	NA	NA	1050	0.587653	NA	NA	1625	1.68077	NA	NA
chr1	93913658	93953658	+	ENST00000370256	ENSG00000137942	FNBP1L	protein_coding	NA	NA	1375	0.569894	NA	NA	NA	NA	1625	0.689835
chr1	95582894	95622894	+	ENST00000370203	ENSG00000152078	TMEM56	protein_coding	NA	NA	NA	NA	NA	NA	1800	1.29185	NA	NA
chr1	100191349	100231349	-	ENST00000287474	ENSG00000156869	FRRS1	protein_coding	NA	NA	NA	NA	NA	NA	1000	2.85339	NA	NA
chr1	100315640	100355640	+	ENST00000361915	ENSG00000162688	AGL	protein_coding	NA	NA	NA	NA	NA	NA	525	0.718769	NA	NA
chr1	100435345	100475345	+	ENST00000465289	ENSG00000117620	SLC35A3	protein_coding	NA	NA	1150	0.922013	NA	NA	NA	NA	1875	1.35186
chr1	100817290	100857290	+	ENST00000455467	ENSG00000079335	CDC14A	protein_coding	NA	NA	NA	NA	NA	NA	NA	NA	1675	0.545192
chr1	101491409	101531409	+	ENST00000421013	ENSG00000233184	RP11-421L21.3	lincRNA	NA	NA	NA	NA	NA	NA	1150	1.10628	NA	NA
chr1	107682629	107722629	+	ENST00000370071	ENSG00000162631	NTNG1	protein_coding	NA	NA	250	0.934223	1175	0.516154	NA	NA	NA	NA
chr1	108191150	108231150	-	ENST00000479977	ENSG00000134215	VAV3	protein_coding	NA	NA	NA	NA	NA	NA	NA	NA	1950	2.35498
chr1	109466106	109506106	-	ENST00000357393	ENSG00000162641	AKNAD1	protein_coding	NA	NA	NA	NA	NA	NA	775	2.8846	1600	1.91788
chr1	110268442	110308442	+	ENST00000431955	ENSG00000241720	RP4-735C1.4	processed_transcript	NA	NA	NA	NA	NA	NA	NA	NA	1700	6.10271
chr1	114471814	114511814	+	ENST00000426820	ENSG00000163349	HIPK1	protein_coding	NA	NA	NA	NA	NA	NA	1475	2.18766	1975	5.94073
chr1	116184574	116224574	+	ENST00000355485	ENSG00000173218	VANGL1	protein_coding	NA	NA	NA	NA	NA	NA	975	0.50423	1900	2.18448
chr1	117170375	117210375	-	ENST00000369486	ENSG00000143061	IGSF3	protein_coding	NA	NA	NA	NA	NA	NA	NA	NA	1325	0.845605
chr1	117452679	117492679	+	ENST00000393203	ENSG00000134247	PTGFRN	protein_coding	NA	NA	NA	NA	NA	NA	1375	0.642358	NA	NA
chr1	145000002	145040002	-	ENST00000313382	ENSG00000178104	PDE4DIP	protein_coding	NA	NA	875	1.24166	NA	NA	NA	NA	NA	NA
chr1	145611036	145651036	+	ENST00000369291	ENSG00000121848	RNF115	protein_coding	NA	NA	NA	NA	2625	0.980106	NA	NA	2825	1.19609
chr1	150629630	150669630	-	ENST00000540514	ENSG00000143457	GOLPH3L	protein_coding	NA	NA	NA	NA	1600	0.735458	1200	1.62815	1475	1.27757
chr1	151171027	151211027	+	ENST00000349792	ENSG00000143398	PIP5K1A	protein_coding	NA	NA	925	2.09533	NA	NA	925	0.820651	NA	NA
chr1	151391941	151431941	-	ENST00000271715	ENSG00000143442	POGZ	protein_coding	NA	NA	1600	1.18624	NA	NA	625	1.9135	1900	2.72095
chr1	151512781	151552781	+	ENST00000392712	ENSG00000143367	TUFT1	protein_coding	NA	NA	1000	0.648868	1450	0.976545	NA	NA	1950	3.85933
chr1	153700543	153740543	+	ENST00000456435	ENSG00000143624	INTS3	protein_coding	NA	NA	NA	NA	350	0.563169	NA	NA	450	0.623295
chr1	156720402	156760402	+	ENST00000491853	ENSG00000143294	PRCC	protein_coding	NA	NA	NA	NA	NA	NA	NA	NA	2800	0.891419
chr1	156975162	157015162	-	ENST00000368194	ENSG00000132694	ARHGEF11	protein_coding	NA	NA	NA	NA	1800	1.16029	NA	NA	NA	NA
chr1	158616488	158656488	-	ENST00000368148	ENSG00000163554	SPTA1	protein_coding	NA	NA	NA	NA	NA	NA	650	2.04911	NA	NA
chr1	158979682	159019682	+	ENST00000368131	ENSG00000163565	IFI16	protein_coding	NA	NA	NA	NA	1550	2.8636	NA	NA	NA	NA
chr1	161736084	161776084	+	ENST00000367942	ENSG00000118217	ATF6	protein_coding	NA	NA	925	0.607859	NA	NA	1750	2.2894	NA	NA
chr1	162039564	162079564	+	ENST00000530878	ENSG00000198929	NOS1AP	protein_coding	NA	NA	NA	NA	NA	NA	NA	NA	1975	2.79294
chr1	163251582	163291582	-	ENST00000449680	ENSG00000232995	RP11-267N12.3	processed_transcript	NA	NA	NA	NA	1750	0.683725	1075	1.24623	NA	NA
chr1	167599330	167639330	+	ENST00000367854	ENSG00000198771	RCSD1	protein_coding	NA	NA	NA	NA	NA	NA	1300	2.77712	NA	NA
chr1	167905021	167945021	+	ENST00000450548	ENSG00000143164	DCAF6	protein_coding	NA	NA	1500	1.21338	NA	NA	NA	NA	1550	1.51242
chr1	169297205	169337205	-	ENST00000367811	ENSG00000143156	NME7	protein_coding	NA	NA	NA	NA	1575	0.586221	NA	NA	NA	NA
chr1	169764190	169804190	+	ENST00000359326	ENSG00000000460	C1orf112	protein_coding	NA	NA	NA	NA	1475	0.713229	1425	1.3211	1575	0.641403
chr1	170003836	170043836	-	ENST00000361580	ENSG00000075945	KIFAP3	protein_coding	NA	NA	1250	0.709975	1275	0.690689	NA	NA	NA	NA
chr1	176136629	176176629	-	ENST00000367669	ENSG00000143207	RFWD2	protein_coding	NA	NA	NA	NA	NA	NA	1725	1.50737	NA	NA
chr1	178062864	178102864	+	ENST00000448150	ENSG00000075391	RASAL2	protein_coding	NA	NA	1675	3.19841	1800	3.46566	NA	NA	NA	NA
chr1	182758428	182798428	+	ENST00000488424	ENSG00000135838	NPL	protein_coding	NA	NA	NA	NA	NA	NA	1100	1.20677	NA	NA
chr1	183441351	183481351	+	ENST00000440812	ENSG00000116698	SMG7	protein_coding	NA	NA	1600	0.958508	NA	NA	1875	1.5292	1825	2.70513
chr1	183966863	184006863	-	ENST00000361927	ENSG00000198756	GLT25D2	protein_coding	NA	NA	NA	NA	NA	NA	1900	5.86002	NA	NA
chr1	184356192	184396192	+	ENST00000235307	ENSG00000116667	C1orf21	protein_coding	NA	NA	875	0.533127	1800	1.38823	NA	NA	1850	0.50625
chr1	184684047	184724047	-	ENST00000318130	ENSG00000116406	EDEM3	protein_coding	NA	NA	850	0.577074	NA	NA	1025	1.39919	1350	1.04021
chr1	185703683	185743683	+	ENST00000271588	ENSG00000143341	HMCN1	protein_coding	NA	NA	1500	2.40519	NA	NA	NA	NA	NA	NA
chr1	186344890	186384890	+	ENST00000367470	ENSG00000157181	C1orf27	protein_coding	NA	NA	1350	0.740651	NA	NA	1400	1.68301	1925	1.774
chr1	196621008	196661008	+	ENST00000367429	ENSG00000000971	CFH	protein_coding	NA	NA	NA	NA	NA	NA	1300	0.813653	NA	NA
chr1	198607801	198647801	+	ENST00000367379	ENSG00000081237	PTPRC	protein_coding	NA	NA	NA	NA	NA	NA	1600	1.98641	NA	NA
chr1	201798269	201838269	+	ENST00000361565	ENSG00000198700	IPO9	protein_coding	NA	NA	NA	NA	NA	NA	675	1.47434	1650	0.938542
chr1	202317827	202357827	+	ENST00000406302	ENSG00000077157	PPP1R12B	protein_coding	NA	NA	NA	NA	NA	NA	975	0.749418	NA	NA
chr1	204485511	204525511	+	ENST00000367182	ENSG00000198625	MDM4	protein_coding	NA	NA	NA	NA	1700	1.13428	575	2.25693	1875	3.12019
chr1	204797779	204837779	+	ENST00000404977	ENSG00000163531	NFASC	protein_coding	NA	NA	1300	1.25741	1650	1.77722	NA	NA	NA	NA
chr1	207818519	207858519	+	ENST00000508064	ENSG00000197721	CR1L	protein_coding	NA	NA	NA	NA	NA	NA	1400	1.00636	NA	NA
chr1	211267457	211307457	-	ENST00000367007	ENSG00000143473	KCNH1	protein_coding	NA	NA	825	0.572831	NA	NA	NA	NA	NA	NA
chr1	211556145	211596145	+	ENST00000423222	ENSG00000153363	LINC00467	lincRNA	NA	NA	NA	NA	NA	NA	1025	1.27548	NA	NA
chr1	212925124	212965124	-	ENST00000366976	ENSG00000117697	NSL1	protein_coding	NA	NA	NA	NA	1125	0.901872	1100	2.22292	NA	NA
chr1	215740735	215780735	+	ENST00000259154	ENSG00000136636	KCTD3	protein_coding	NA	NA	1575	0.833304	NA	NA	1450	1.67587	1975	4.55898
chr1	217764424	217804424	-	ENST00000366935	ENSG00000092978	GPATCH2	protein_coding	NA	NA	1150	0.774237	NA	NA	NA	NA	1700	2.93267
chr1	218519577	218559577	+	ENST00000366929	ENSG00000092969	TGFB2	protein_coding	NA	NA	1050	1.18988	NA	NA	NA	NA	NA	NA
chr1	222791428	222831428	+	ENST00000344922	ENSG00000154305	MIA3	protein_coding	NA	NA	NA	NA	NA	NA	625	1.70974	700	0.958941
chr1	223900034	223940034	+	ENST00000295006	ENSG00000162909	CAPN2	protein_coding	NA	NA	NA	NA	NA	NA	1025	0.667548	NA	NA
chr1	223993674	224033674	-	ENST00000343537	ENSG00000143514	TP53BP2	protein_coding	NA	NA	NA	NA	NA	NA	1750	2.22684	NA	NA
chr1	224622362	224662362	+	ENST00000471578	ENSG00000143786	CNIH3	protein_coding	NA	NA	NA	NA	NA	NA	975	0.758514	NA	NA
chr1	224803995	224843995	+	ENST00000272133	ENSG00000143786	CNIH3	protein_coding	NA	NA	1675	2.64383	1800	1.763	NA	NA	NA	NA
chr1	225117356	225157356	+	ENST00000430092	ENSG00000185842	DNAH14	protein_coding	NA	NA	NA	NA	NA	NA	1100	2.37673	NA	NA
chr1	227751236	227791236	+	ENST00000498759	ENSG00000181450	ZNF678	protein_coding	NA	NA	NA	NA	1700	0.754327	1075	0.652994	1925	0.801099
chr1	227916358	227956358	+	ENST00000366760	ENSG00000143740	SNAP47	protein_coding	NA	NA	NA	NA	NA	NA	NA	NA	1875	0.594388
chr1	230202956	230242956	+	ENST00000366672	ENSG00000143641	GALNT2	protein_coding	NA	NA	1075	0.703502	NA	NA	NA	NA	1575	0.936906
chr1	231074621	231114621	-	ENST00000481976	ENSG00000143643	TTC13	protein_coding	NA	NA	NA	NA	NA	NA	NA	NA	1175	0.567445
chr1	233463514	233503514	+	ENST00000366623	ENSG00000143674	RP5-862P8.2	protein_coding	NA	NA	NA	NA	NA	NA	NA	NA	1625	0.617514
chr1	233749750	233789750	+	ENST00000366621	ENSG00000135750	KCNK1	protein_coding	NA	NA	NA	NA	NA	NA	1325	1.02064	1875	1.72459
chr1	234574849	234614849	-	ENST00000040877	ENSG00000059588	TARBP1	protein_coding	NA	NA	NA	NA	1400	0.636375	800	0.570985	1200	1.10206
chr1	235990220	236030220	-	ENST00000389793	ENSG00000143669	LYST	protein_coding	NA	NA	1275	0.99737	1575	1.15671	NA	NA	1525	0.706525
chr1	236405319	236445319	-	ENST00000327333	ENSG00000086619	ERO1LB	protein_coding	NA	NA	NA	NA	NA	NA	1300	0.628083	NA	NA
chr1	239549865	239589865	+	ENST00000468573	ENSG00000133019	CHRM3	protein_coding	NA	NA	NA	NA	1725	0.538249	NA	NA	NA	NA
chr1	243419320	243459320	+	ENST00000355875	ENSG00000054282	SDCCAG8	protein_coding	NA	NA	1925	0.65961	2075	1.47692	1000	1.2258	NA	NA
chr1	245133007	245173007	+	ENST00000391837	ENSG00000203666	EFCAB2	protein_coding	NA	NA	NA	NA	NA	NA	525	0.521024	NA	NA
chr1	246630614	246670614	-	ENST00000403792	ENSG00000185420	SMYD3	protein_coding	NA	NA	700	0.524642	1475	0.885317	NA	NA	1050	0.778847
chr1	247131395	247171395	-	ENST00000487338	ENSG00000197472	ZNF695	protein_coding	NA	NA	NA	NA	NA	NA	NA	NA	2300	1.36604
chr10	11206993	11246993	+	ENST00000354440	ENSG00000048740	CELF2	protein_coding	NA	NA	NA	NA	NA	NA	1500	1.60058	NA	NA
chr10	11865338	11905338	+	ENST00000474155	ENSG00000148426	C10orf47	protein_coding	NA	NA	NA	NA	NA	NA	NA	NA	1625	0.9068
chr10	12171693	12211693	+	ENST00000475268	ENSG00000065665	SEC61A2	protein_coding	NA	NA	NA	NA	1625	0.800809	NA	NA	1300	0.771756
chr10	12237965	12277965	+	ENST00000281141	ENSG00000151465	CDC123	protein_coding	NA	NA	NA	NA	NA	NA	1275	1.15093	NA	NA
chr10	13203554	13243554	+	ENST00000361282	ENSG00000065328	MCM10	protein_coding	NA	NA	NA	NA	NA	NA	1025	1.10069	NA	NA
chr10	13530533	13570533	-	ENST00000396898	ENSG00000165626	BEND7	protein_coding	NA	NA	NA	NA	1475	0.504471	NA	NA	NA	NA
chr10	17456329	17496329	-	ENST00000377602	ENSG00000148488	ST8SIA6	protein_coding	NA	NA	NA	NA	NA	NA	1275	2.54802	1575	2.42533
chr10	21423116	21463116	-	ENST00000417816	ENSG00000078114	NEBL	protein_coding	NA	NA	NA	NA	NA	NA	700	0.709393	1525	1.93097
chr10	21823102	21863102	+	ENST00000377072	ENSG00000078403	MLLT10	protein_coding	NA	NA	825	1.40499	NA	NA	NA	NA	NA	NA
chr10	22680734	22720734	+	ENST00000487973	ENSG00000077327	SPAG6	protein_coding	NA	NA	NA	NA	NA	NA	1125	2.439	NA	NA
chr10	24738362	24778362	+	ENST00000307544	ENSG00000120549	KIAA1217	protein_coding	NA	NA	NA	NA	2550	0.54904	NA	NA	NA	NA
chr10	27300293	27340293	-	ENST00000376070	ENSG00000107890	ANKRD26	protein_coding	NA	NA	275	0.673888	NA	NA	NA	NA	NA	NA
chr10	27403321	27443321	-	ENST00000376016	ENSG00000136758	YME1L1	protein_coding	NA	NA	1025	1.43662	NA	NA	1075	2.96409	1725	2.56518
chr10	32596146	32636146	-	ENST00000319778	ENSG00000120616	EPC1	protein_coding	NA	NA	NA	NA	NA	NA	NA	NA	1950	2.9594
chr10	32627726	32667726	-	ENST00000375110	ENSG00000120616	EPC1	protein_coding	NA	NA	NA	NA	NA	NA	1450	1.34895	NA	NA
chr10	32735068	32775068	+	ENST00000476558	ENSG00000216937	CCDC7	protein_coding	NA	NA	NA	NA	1150	0.631836	NA	NA	NA	NA
chr10	35339570	35379570	-	ENST00000374742	ENSG00000108094	CUL2	protein_coding	NA	NA	NA	NA	NA	NA	1200	0.807496	NA	NA
chr10	35415719	35455719	+	ENST00000474362	ENSG00000095794	CREM	protein_coding	NA	NA	NA	NA	NA	NA	1750	0.699456	1550	0.700962
chr10	52833934	52873934	+	ENST00000373980	ENSG00000185532	PRKG1	protein_coding	NA	NA	NA	NA	NA	NA	NA	NA	1900	1.23197
chr10	62020240	62060240	-	ENST00000503925	ENSG00000151150	ANK3	protein_coding	NA	NA	NA	NA	NA	NA	1400	0.750677	NA	NA
chr10	62453248	62493248	-	ENST00000373827	ENSG00000151150	ANK3	protein_coding	NA	NA	NA	NA	NA	NA	NA	NA	1650	1.53544
chr10	64989013	65029013	-	ENST00000489372	ENSG00000171988	JMJD1C	protein_coding	NA	NA	NA	NA	1425	4.26226	1675	5.35019	1925	3.70825
chr10	69557922	69597922	-	ENST00000225171	ENSG00000108176	DNAJC12	protein_coding	NA	NA	NA	NA	NA	NA	1050	0.843741	NA	NA
chr10	70191879	70231879	-	ENST00000399179	ENSG00000138346	DNA2	protein_coding	NA	NA	NA	NA	675	0.507698	NA	NA	NA	NA
chr10	70247231	70287231	-	ENST00000265870	ENSG00000122912	SLC25A16	protein_coding	NA	NA	1075	0.559126	1450	0.685838	1075	1.26568	1075	0.799136
chr10	70587298	70627298	+	ENST00000399169	ENSG00000165730	STOX1	protein_coding	NA	NA	NA	NA	NA	NA	NA	NA	1500	0.53963
chr10	71075541	71115541	+	ENST00000436817	ENSG00000156515	HK1	protein_coding	NA	NA	NA	NA	NA	NA	700	1.29255	NA	NA
chr10	71561644	71601644	+	ENST00000356340	ENSG00000197467	COL13A1	protein_coding	NA	NA	NA	NA	1675	0.506474	NA	NA	NA	NA
chr10	73079015	73119015	+	ENST00000373189	ENSG00000198246	SLC29A3	protein_coding	NA	NA	NA	NA	NA	NA	NA	NA	1000	0.634203
chr10	73940083	73980083	-	ENST00000373101	ENSG00000138303	ASCC1	protein_coding	NA	NA	NA	NA	NA	NA	NA	NA	1700	0.591007
chr10	74816732	74856732	-	ENST00000440381	ENSG00000122884	P4HA1	protein_coding	NA	NA	NA	NA	NA	NA	NA	NA	1725	1.47425
chr10	75345711	75385711	-	ENST00000433394	ENSG00000166348	USP54	protein_coding	NA	NA	NA	NA	NA	NA	425	0.649495	NA	NA
chr10	75450224	75490224	-	ENST00000399449	ENSG00000242288	RP11-464F9.1	processed_transcript	NA	NA	NA	NA	1525	0.590048	NA	NA	NA	NA
chr10	77121004	77161004	-	ENST00000418818	ENSG00000165655	ZNF503	protein_coding	NA	NA	800	0.735919	NA	NA	NA	NA	NA	NA
chr10	79749303	79789303	-	ENST00000372371	ENSG00000148606	POLR3A	protein_coding	NA	NA	1050	0.868956	1650	1.24912	NA	NA	1075	1.26284
chr10	80008497	80048497	+	ENST00000546103	ENSG00000230417	RP11-90J7.3	lincRNA	NA	NA	NA	NA	1300	1.08558	NA	NA	NA	NA
chr10	90711147	90751147	-	ENST00000458208	ENSG00000107796	ACTA2	protein_coding	NA	NA	NA	NA	1300	0.860842	NA	NA	NA	NA
chr10	93963036	94003036	-	ENST00000412050	ENSG00000107864	CPEB3	protein_coding	NA	NA	NA	NA	NA	NA	1300	0.596175	NA	NA
chr10	94590935	94630935	+	ENST00000371547	ENSG00000138190	EXOC6	protein_coding	NA	NA	NA	NA	NA	NA	1625	1.91154	NA	NA
chr10	94608242	94648242	+	ENST00000371543	ENSG00000138190	EXOC6	protein_coding	NA	NA	NA	NA	NA	NA	NA	NA	1625	0.756594
chr10	97809995	97849995	-	ENST00000427846	ENSG00000226688	RP11-429G19.2	processed_transcript	NA	NA	NA	NA	NA	NA	1350	1.00636	NA	NA
chr10	101088856	101128856	+	ENST00000356713	ENSG00000119946	CNNM1	protein_coding	NA	NA	825	0.781307	NA	NA	NA	NA	NA	NA
chr10	101949344	101989344	-	ENST00000370397	ENSG00000213341	CHUK	protein_coding	NA	NA	NA	NA	1575	1.27457	NA	NA	NA	NA
chr10	104503727	104543727	+	ENST00000448841	ENSG00000166272	WBP1L	protein_coding	NA	NA	1025	0.523228	NA	NA	NA	NA	NA	NA
chr10	104913056	104953056	-	ENST00000343289	ENSG00000076685	NT5C2	protein_coding	NA	NA	1075	1.2942	NA	NA	875	0.946603	NA	NA
chr10	111643311	111683311	-	ENST00000322238	ENSG00000108039	XPNPEP1	protein_coding	NA	NA	NA	NA	NA	NA	1200	0.538377	NA	NA
chr10	112404155	112444155	+	ENST00000369519	ENSG00000203867	RBM20	protein_coding	NA	NA	NA	NA	NA	NA	1150	1.32754	NA	NA
chr10	115939029	115979029	+	ENST00000422662	ENSG00000095627	TDRD1	protein_coding	NA	NA	NA	NA	NA	NA	NA	NA	1375	1.30942
chr10	117993126	118033126	-	ENST00000439649	ENSG00000151892	GFRA1	protein_coding	NA	NA	NA	NA	NA	NA	NA	NA	1875	6.98955
chr10	120474761	120514761	-	ENST00000493518	ENSG00000151893	CACUL1	protein_coding	NA	NA	1475	0.766921	NA	NA	1425	0.987048	NA	NA
chr10	121262220	121302220	-	ENST00000369103	ENSG00000148908	RGS10	protein_coding	NA	NA	NA	NA	NA	NA	800	0.536838	NA	NA
chr10	121593133	121633133	-	ENST00000466047	ENSG00000197771	MCMBP	protein_coding	NA	NA	1725	0.645496	2100	1.98598	NA	NA	2100	1.77204
chr10	122216466	122256466	+	ENST00000439221	ENSG00000203805	PPAPDC1A	protein_coding	NA	NA	NA	NA	2275	0.630834	NA	NA	NA	NA
chr10	123969557	124009557	+	ENST00000368997	ENSG00000138162	TACC2	protein_coding	NA	NA	NA	NA	NA	NA	NA	NA	3575	1.61496
chr10	124134173	124174173	+	ENST00000479786	ENSG00000107679	PLEKHA1	protein_coding	NA	NA	775	0.534161	1500	0.73864	NA	NA	1850	0.639767
chr10	124599146	124639146	-	ENST00000545804	ENSG00000138161	CUZD1	protein_coding	NA	NA	NA	NA	NA	NA	625	0.513886	NA	NA
chr10	131722105	131762105	-	ENST00000368648	ENSG00000108001	EBF3	protein_coding	NA	NA	NA	NA	1675	0.908281	NA	NA	NA	NA
chr11	450280	490280	+	ENST00000308020	ENSG00000174915	PTDSS2	protein_coding	NA	NA	NA	NA	NA	NA	800	0.524662	NA	NA
chr11	655532	695532	-	ENST00000382409	ENSG00000177030	DEAF1	protein_coding	NA	NA	NA	NA	NA	NA	950	0.616468	NA	NA
chr11	924894	964894	+	ENST00000529818	ENSG00000183020	AP2A2	protein_coding	NA	NA	1300	0.570765	2000	1.12888	NA	NA	NA	NA
chr11	2973607	3013607	-	ENST00000526115	ENSG00000205531	NAP1L4	protein_coding	NA	NA	NA	NA	NA	NA	NA	NA	1675	2.47867
chr11	13690217	13730217	+	ENST00000354817	ENSG00000197601	FAR1	protein_coding	NA	NA	NA	NA	1775	2.05186	1400	1.62731	2125	2.24415
chr11	14481441	14521441	-	ENST00000439561	ENSG00000129083	COPB1	protein_coding	NA	NA	825	3.21658	NA	NA	NA	NA	NA	NA
chr11	14625163	14665163	-	ENST00000418988	ENSG00000129084	PSMA1	protein_coding	NA	NA	NA	NA	NA	NA	950	0.699456	900	0.500687
chr11	14665269	14705269	+	ENST00000282096	ENSG00000152270	PDE3B	protein_coding	NA	NA	NA	NA	NA	NA	1450	2.21971	1675	0.981085
chr11	17298288	17338288	+	ENST00000323688	ENSG00000070081	NUCB2	protein_coding	NA	NA	NA	NA	1625	1.09074	850	1.16996	1400	0.970177
chr11	17994709	18034709	-	ENST00000265965	ENSG00000129158	SERGEF	protein_coding	NA	NA	NA	NA	NA	NA	NA	NA	1400	0.551846
chr11	18343842	18383842	+	ENST00000453096	ENSG00000110768	GTF2H1	protein_coding	NA	NA	1250	1.54031	NA	NA	1300	1.8655	1700	2.90191
chr11	20409076	20449076	+	ENST00000331079	ENSG00000185238	PRMT3	protein_coding	NA	NA	NA	NA	2025	0.762471	775	1.62535	NA	NA
chr11	31531297	31571297	+	ENST00000350638	ENSG00000109911	ELP4	protein_coding	NA	NA	NA	NA	NA	NA	750	0.647956	1400	0.507559
chr11	32417176	32457176	-	ENST00000332351	ENSG00000184937	WT1	protein_coding	NA	NA	NA	NA	NA	NA	375	0.655373	NA	NA
chr11	32956130	32996130	+	ENST00000524678	ENSG00000060749	QSER1	protein_coding	NA	NA	NA	NA	650	1.28399	NA	NA	NA	NA
chr11	33061118	33101118	+	ENST00000527661	ENSG00000176148	TCP11L1	protein_coding	NA	NA	NA	NA	1350	1.01491	NA	NA	NA	NA
chr11	35511848	35551848	-	ENST00000532848	ENSG00000149090	PAMR1	protein_coding	NA	NA	1700	0.515695	NA	NA	NA	NA	NA	NA
chr11	35965531	36005531	+	ENST00000528989	ENSG00000179241	LDLRAD3	protein_coding	NA	NA	NA	NA	NA	NA	NA	NA	1625	0.774047
chr11	43380482	43420482	+	ENST00000299240	ENSG00000052841	TTC17	protein_coding	NA	NA	1200	0.653791	NA	NA	1275	1.01728	1700	1.36538
chr11	44932840	44972840	-	ENST00000354556	ENSG00000175274	TP53I11	protein_coding	NA	NA	1900	0.616452	NA	NA	NA	NA	NA	NA
chr11	46638826	46678826	+	ENST00000312040	ENSG00000175224	ATG13	protein_coding	NA	NA	NA	NA	NA	NA	975	0.949263	1875	1.0413
chr11	47290927	47330927	+	ENST00000342922	ENSG00000110514	MADD	protein_coding	NA	NA	750	0.619226	NA	NA	1000	1.2724	1350	1.30179
chr11	47534669	47574669	-	ENST00000310513	ENSG00000149187	CELF1	protein_coding	NA	NA	1650	1.30622	NA	NA	NA	NA	NA	NA
chr11	57480077	57520077	+	ENST00000528395	ENSG00000254462	TMX2-CTNND1	protein_coding	NA	NA	NA	NA	NA	NA	250	1.19949	NA	NA
chr11	57529234	57569234	+	ENST00000360682	ENSG00000198561	CTNND1	protein_coding	NA	NA	NA	NA	NA	NA	1925	2.86206	2025	2.12176
chr11	59343617	59383617	-	ENST00000263847	ENSG00000110048	OSBP	protein_coding	NA	NA	975	0.822888	NA	NA	1050	1.86788	1625	1.18736
chr11	59522532	59562532	+	ENST00000535361	ENSG00000166900	STX3	protein_coding	NA	NA	1550	1.09312	NA	NA	1400	0.856617	NA	NA
chr11	63341841	63381841	-	ENST00000323646	ENSG00000176485	PLA2G16	protein_coding	NA	NA	NA	NA	NA	NA	NA	NA	1725	0.725614
chr11	63606400	63646400	+	ENST00000413835	ENSG00000072518	MARK2	protein_coding	NA	NA	1325	0.76499	NA	NA	950	0.934988	NA	NA
chr11	63893578	63933578	-	ENST00000545464	ENSG00000133315	MACROD1	protein_coding	NA	NA	NA	NA	NA	NA	NA	NA	1000	0.575954
chr11	65837834	65877834	+	ENST00000527224	ENSG00000175115	PACS1	protein_coding	NA	NA	1575	1.34484	NA	NA	NA	NA	NA	NA
chr11	66456430	66496430	-	ENST00000533211	ENSG00000173898	SPTBN2	protein_coding	NA	NA	NA	NA	NA	NA	850	0.517245	NA	NA
chr11	66512089	66552089	+	ENST00000524551	ENSG00000173715	C11orf80	protein_coding	NA	NA	NA	NA	NA	NA	NA	NA	1850	0.617623
chr11	68080077	68120077	+	ENST00000294304	ENSG00000162337	LRP5	protein_coding	NA	NA	NA	NA	NA	NA	NA	NA	1725	0.661583
chr11	68569399	68609399	-	ENST00000265641	ENSG00000110090	CPT1A	protein_coding	NA	NA	NA	NA	1475	0.595188	NA	NA	1325	0.990248
chr11	71639747	71679747	+	ENST00000361756	ENSG00000137522	RNF121	protein_coding	NA	NA	NA	NA	NA	NA	1300	0.74228	NA	NA
chr11	73842064	73882064	-	ENST00000334126	ENSG00000168014	C2CD3	protein_coding	NA	NA	1125	0.750577	NA	NA	NA	NA	NA	NA
chr11	74620245	74660245	-	ENST00000531849	ENSG00000166435	XRRA1	protein_coding	NA	NA	NA	NA	1525	0.648746	1075	0.685462	NA	NA
chr11	75022873	75062873	-	ENST00000393505	ENSG00000137486	ARRB1	protein_coding	NA	NA	NA	NA	NA	NA	NA	NA	1500	0.511813
chr11	75526212	75566212	+	ENST00000356136	ENSG00000198382	UVRAG	protein_coding	NA	NA	NA	NA	NA	NA	1475	0.563428	2200	1.91963
chr11	75589448	75629448	+	ENST00000528264	ENSG00000198382	UVRAG	protein_coding	NA	NA	NA	NA	175	0.857882	NA	NA	NA	NA
chr11	75694480	75734480	+	ENST00000539288	ENSG00000198382	UVRAG	protein_coding	NA	NA	NA	NA	NA	NA	NA	NA	3500	3.65164
chr11	77083109	77123109	-	ENST00000530617	ENSG00000149269	PAK1	protein_coding	NA	NA	1050	0.582078	NA	NA	NA	NA	NA	NA
chr11	77750911	77790911	-	ENST00000530054	ENSG00000259112	NDUFC2-KCTD14	protein_coding	NA	NA	NA	NA	1500	1.00558	1250	2.09236	NA	NA
chr11	78089394	78129394	-	ENST00000528886	ENSG00000033327	GAB2	protein_coding	NA	NA	1500	0.658985	NA	NA	1825	4.35418	NA	NA
chr11	82612740	82652740	+	ENST00000525361	ENSG00000165490	C11orf82	protein_coding	NA	NA	NA	NA	NA	NA	1350	0.509548	1550	0.589698
chr11	85482184	85522184	-	ENST00000527523	ENSG00000137501	SYTL2	protein_coding	NA	NA	NA	NA	NA	NA	NA	NA	1750	6.84829
chr11	86013253	86053253	+	ENST00000533986	ENSG00000149196	C11orf73	protein_coding	NA	NA	NA	NA	475	0.713897	450	0.71709	NA	NA
chr11	93063137	93103137	+	ENST00000534747	ENSG00000165325	CCDC67	protein_coding	NA	NA	NA	NA	NA	NA	1425	0.687561	NA	NA
chr11	94187074	94227074	-	ENST00000323929	ENSG00000020922	MRE11A	protein_coding	NA	NA	NA	NA	1525	0.836477	950	1.66677	1100	0.736413
chr11	95523129	95563129	+	ENST00000537677	ENSG00000166037	CEP57	protein_coding	NA	NA	NA	NA	NA	NA	1000	2.14147	NA	NA
chr11	96199990	96239990	-	ENST00000511243	ENSG00000255679	JRKL-AS1	lincRNA	NA	NA	NA	NA	NA	NA	1375	1.67811	NA	NA
chr11	100961255	101001255	-	ENST00000325455	ENSG00000082175	PGR	protein_coding	NA	NA	NA	NA	NA	NA	NA	NA	2200	7.35574
chr11	102980160	103020160	+	ENST00000375735	ENSG00000187240	DYNC2H1	protein_coding	NA	NA	NA	NA	1450	0.794845	NA	NA	1500	0.52294
chr11	106849250	106889250	-	ENST00000526355	ENSG00000152402	GUCY1A2	protein_coding	NA	NA	NA	NA	NA	NA	NA	NA	2075	1.03355
chr11	108093211	108133211	+	ENST00000527805	ENSG00000149311	ATM	protein_coding	NA	NA	NA	NA	1825	1.04018	NA	NA	NA	NA
chr11	108424465	108464465	-	ENST00000525344	ENSG00000110723	EXPH5	protein_coding	NA	NA	NA	NA	NA	NA	575	0.856477	NA	NA
chr11	108535752	108575752	+	ENST00000322536	ENSG00000178105	DDX10	protein_coding	NA	NA	NA	NA	1400	0.706932	NA	NA	1950	0.633113
chr11	110127447	110167447	-	ENST00000343115	ENSG00000137710	RDX	protein_coding	NA	NA	1125	1.05878	NA	NA	1525	0.95528	NA	NA
chr11	111848033	111888033	+	ENST00000315253	ENSG00000150764	DIXDC1	protein_coding	NA	NA	1200	1.28112	NA	NA	NA	NA	NA	NA
chr11	117103452	117143452	+	ENST00000531287	ENSG00000167257	RNF214	protein_coding	NA	NA	NA	NA	1450	0.635774	NA	NA	NA	NA
chr11	120894781	120934781	+	ENST00000529397	ENSG00000154114	TBCEL	protein_coding	NA	NA	1075	0.711308	NA	NA	NA	NA	NA	NA
chr11	122198681	122238681	-	ENST00000527474	ENSG00000255090	RP11-820L6.1	processed_transcript	NA	NA	NA	NA	1475	0.675047	NA	NA	NA	NA
chr11	124824017	124864017	+	ENST00000529051	ENSG00000149548	CCDC15	protein_coding	NA	NA	NA	NA	NA	NA	750	0.613809	NA	NA
chr11	130746404	130786404	-	ENST00000265909	ENSG00000120451	SNX19	protein_coding	NA	NA	NA	NA	NA	NA	225	1.0552	1175	0.800226
chr12	4607674	4647674	-	ENST00000545746	ENSG00000047621	C12orf4	protein_coding	NA	NA	NA	NA	NA	NA	1375	0.820091	NA	NA
chr12	12510013	12550013	+	ENST00000542728	ENSG00000165714	LOH12CR1	protein_coding	NA	NA	NA	NA	1650	0.52403	NA	NA	NA	NA
chr12	15334351	15374351	-	ENST00000546331	ENSG00000134533	RERG	protein_coding	NA	NA	NA	NA	NA	NA	NA	NA	1675	1.32502
chr12	15461532	15501532	-	ENST00000393736	ENSG00000134533	RERG	protein_coding	NA	NA	NA	NA	NA	NA	200	0.563847	NA	NA
chr12	26111962	26151962	+	ENST00000381352	ENSG00000123094	RASSF8	protein_coding	NA	NA	1750	2.12699	NA	NA	NA	NA	1750	0.611951
chr12	27127327	27167327	-	ENST00000343028	ENSG00000064115	TM7SF3	protein_coding	NA	NA	800	0.519747	NA	NA	625	0.501011	1925	0.695398
chr12	27175510	27215510	+	ENST00000538186	ENSG00000152944	MED21	protein_coding	NA	NA	NA	NA	NA	NA	1300	1.93421	NA	NA
chr12	27485787	27525787	+	ENST00000544915	ENSG00000029153	ARNTL2	protein_coding	NA	NA	NA	NA	1600	0.608606	NA	NA	NA	NA
chr12	27863706	27903706	+	ENST00000081029	ENSG00000061794	MRPS35	protein_coding	NA	NA	NA	NA	NA	NA	1375	1.80196	1925	1.00236
chr12	30867448	30907448	-	ENST00000454014	ENSG00000110888	CAPRIN2	protein_coding	NA	NA	850	0.742609	NA	NA	NA	NA	NA	NA
chr12	32832134	32872134	+	ENST00000452533	ENSG00000087470	DNM1L	protein_coding	NA	NA	NA	NA	NA	NA	1175	0.585259	1700	0.756593
chr12	33552754	33592754	-	ENST00000228567	ENSG00000110975	SYT10	protein_coding	NA	NA	NA	NA	NA	NA	850	1.0706	NA	NA
chr12	39797192	39837192	-	ENST00000395670	ENSG00000139116	KIF21A	protein_coding	NA	NA	NA	NA	NA	NA	1650	0.842202	1950	1.14045
chr12	40019969	40059969	+	ENST00000405531	ENSG00000180116	C12orf40	protein_coding	NA	NA	NA	NA	NA	NA	425	0.586099	NA	NA
chr12	40459891	40499891	-	ENST00000380858	ENSG00000151229	SLC2A13	protein_coding	NA	NA	NA	NA	NA	NA	1125	0.628083	1475	0.539629
chr12	42498681	42538681	-	ENST00000398675	ENSG00000151233	GXYLT1	protein_coding	NA	NA	NA	NA	2050	0.971317	NA	NA	2025	0.994174
chr12	42944157	42984157	-	ENST00000445766	ENSG00000139174	PRICKLE1	protein_coding	NA	NA	850	1.05704	NA	NA	NA	NA	NA	NA
chr12	46777462	46817462	+	ENST00000551503	ENSG00000257261	RP11-96H19.1	processed_transcript	NA	NA	NA	NA	NA	NA	1275	2.72645	1325	1.05701
chr12	50637353	50677353	-	ENST00000549681	ENSG00000050405	LIMA1	protein_coding	NA	NA	1225	0.515886	1225	0.550753	NA	NA	NA	NA
chr12	51382349	51422349	-	ENST00000547688	ENSG00000110911	SLC11A2	protein_coding	NA	NA	NA	NA	NA	NA	NA	NA	1675	1.65129
chr12	53303666	53343666	-	ENST00000546826	ENSG00000170421	KRT8	protein_coding	NA	NA	NA	NA	NA	NA	875	0.835065	NA	NA
chr12	62613951	62653951	-	ENST00000552075	ENSG00000198673	FAM19A2	protein_coding	NA	NA	NA	NA	NA	NA	1025	1.21656	NA	NA
chr12	65174589	65214589	+	ENST00000229088	ENSG00000111490	TBC1D30	protein_coding	NA	NA	NA	NA	NA	NA	NA	NA	1775	1.3332
chr12	66696360	66736360	+	ENST00000545134	ENSG00000127311	HELB	protein_coding	NA	NA	NA	NA	NA	NA	425	0.549993	NA	NA
chr12	67422942	67462942	-	ENST00000535721	ENSG00000256248	RP11-123O10.4	lincRNA	NA	NA	NA	NA	NA	NA	NA	NA	1925	1.19739
chr12	67663061	67703061	+	ENST00000545606	ENSG00000111530	CAND1	protein_coding	NA	NA	1650	1.21389	NA	NA	1675	1.45391	2000	3.32373
chr12	69080514	69120514	+	ENST00000229179	ENSG00000111581	NUP107	protein_coding	NA	NA	NA	NA	1325	0.564705	475	1.45363	1075	0.874839
chr12	70132461	70172461	+	ENST00000247833	ENSG00000127328	RAB3IP	protein_coding	NA	NA	NA	NA	NA	NA	NA	NA	1875	1.01446
chr12	70597138	70637138	-	ENST00000549419	ENSG00000257815	RP11-611E13.2	processed_transcript	NA	NA	NA	NA	1200	0.560255	725	1.2766	NA	NA
chr12	71833550	71873550	+	ENST00000266674	ENSG00000139292	LGR5	protein_coding	NA	NA	975	0.659447	NA	NA	NA	NA	NA	NA
chr12	72233487	72273487	+	ENST00000482439	ENSG00000121749	TBC1D15	protein_coding	NA	NA	NA	NA	1850	1.87299	1225	1.71281	NA	NA
chr12	74646411	74686411	-	ENST00000549905	ENSG00000251138	RP11-81H3.2	lincRNA	NA	NA	NA	NA	NA	NA	1100	1.17052	NA	NA
chr12	80083924	80123924	+	ENST00000551995	ENSG00000258048	RP11-530C5.1	lincRNA	NA	NA	1175	0.517572	NA	NA	NA	NA	1225	0.817789
chr12	80289240	80329240	-	ENST00000437004	ENSG00000058272	PPP1R12A	protein_coding	NA	NA	1575	7.5988	NA	NA	1575	2.7543	NA	NA
chr12	81470990	81510990	+	ENST00000548058	ENSG00000111058	ACSS3	protein_coding	NA	NA	NA	NA	NA	NA	NA	NA	1925	1.15627
chr12	83080659	83120659	+	ENST00000551915	ENSG00000179104	TMTC2	protein_coding	NA	NA	NA	NA	NA	NA	NA	NA	850	0.662347
chr12	88495993	88535993	-	ENST00000552810	ENSG00000198707	CEP290	protein_coding	NA	NA	850	0.519258	NA	NA	800	1.04667	1025	0.511813
chr12	89879801	89919801	-	ENST00000313546	ENSG00000139323	POC1B	protein_coding	NA	NA	NA	NA	NA	NA	1000	0.735143	1375	1.3296
chr12	100338432	100378432	-	ENST00000549866	ENSG00000185046	ANKS1B	protein_coding	NA	NA	NA	NA	NA	NA	NA	NA	1400	0.971595
chr12	100620857	100660857	-	ENST00000378244	ENSG00000166153	DEPDC4	protein_coding	NA	NA	NA	NA	NA	NA	550	0.538097	NA	NA
chr12	101564185	101604185	-	ENST00000536262	ENSG00000256870	SLC5A8	protein_coding	NA	NA	NA	NA	NA	NA	NA	NA	1725	0.730523
chr12	104458235	104498235	+	ENST00000229330	ENSG00000111727	HCFC2	protein_coding	NA	NA	1125	1.35977	NA	NA	NA	NA	1550	0.639985
chr12	104850746	104890746	+	ENST00000547956	ENSG00000171310	CHST11	protein_coding	NA	NA	NA	NA	NA	NA	1800	1.10586	NA	NA
chr12	105438355	105478355	-	ENST00000258494	ENSG00000136010	ALDH1L2	protein_coding	NA	NA	NA	NA	NA	NA	675	0.949822	NA	NA
chr12	110562140	110602140	+	ENST00000552912	ENSG00000122970	IFT81	protein_coding	NA	NA	NA	NA	1125	0.65333	NA	NA	NA	NA
chr12	112083790	112123790	-	ENST00000419234	ENSG00000089234	BRAP	protein_coding	NA	NA	NA	NA	NA	NA	1350	0.995445	NA	NA
chr12	114171486	114211486	-	ENST00000550905	ENSG00000249550	RP11-438N16.1	lincRNA	NA	NA	NA	NA	NA	NA	1850	0.620666	NA	NA
chr12	119617395	119657395	+	ENST00000541798	ENSG00000152137	HSPB8	protein_coding	NA	NA	NA	NA	NA	NA	NA	NA	1600	22.2723
chr12	120427673	120467673	+	ENST00000397558	ENSG00000135127	CCDC64	protein_coding	NA	NA	NA	NA	NA	NA	NA	NA	1150	1.06104
chr12	120972154	121012154	+	ENST00000325954	ENSG00000022840	RNF10	protein_coding	NA	NA	1450	1.45726	NA	NA	1575	1.79902	1625	3.26352
chr12	122150658	122190658	+	ENST00000342607	ENSG00000188735	TMEM120B	protein_coding	NA	NA	NA	NA	NA	NA	NA	NA	1450	0.773283
chr12	122457328	122497328	+	ENST00000538010	ENSG00000110987	BCL7A	protein_coding	NA	NA	NA	NA	NA	NA	NA	NA	1650	0.720487
chr12	123011795	123051795	+	ENST00000450485	ENSG00000184445	KNTC1	protein_coding	NA	NA	NA	NA	825	0.693048	825	1.72233	NA	NA
chr12	123677695	123717695	-	ENST00000545556	ENSG00000051825	MPHOSPH9	protein_coding	NA	NA	NA	NA	NA	NA	1200	1.6434	NA	NA
chr12	124196865	124236865	+	ENST00000330342	ENSG00000185344	ATP6V0A2	protein_coding	NA	NA	NA	NA	NA	NA	1475	1.47742	1475	0.750921
chr12	124962840	125002840	-	ENST00000420698	ENSG00000196498	NCOR2	protein_coding	NA	NA	NA	NA	850	0.723309	NA	NA	1500	0.723215
chr13	19406107	19446107	-	ENST00000457997	ENSG00000206192	ANKRD20A9P	pseudogene	NA	NA	75	3.37215	2300	5.36997	2825	4.02587	2350	4.14458
chr13	20397776	20437776	-	ENST00000337963	ENSG00000132950	ZMYM5	protein_coding	NA	NA	1250	0.621456	NA	NA	1250	0.647116	1825	1.65739
chr13	24423558	24463558	-	ENST00000382172	ENSG00000027001	MIPEP	protein_coding	NA	NA	NA	NA	NA	NA	NA	NA	1600	0.573008
chr13	24734861	24774861	+	ENST00000382108	ENSG00000182957	SPATA13	protein_coding	NA	NA	NA	NA	1525	1.30428	NA	NA	1675	0.656456
chr13	28196003	28236003	+	ENST00000399697	ENSG00000186184	POLR1D	protein_coding	NA	NA	NA	NA	1850	1.63555	1375	0.912037	1825	1.55748
chr13	32889611	32929611	+	ENST00000380152	ENSG00000139618	BRCA2	protein_coding	NA	NA	NA	NA	975	0.741243	975	1.14911	925	1.26241
chr13	34210905	34250905	-	ENST00000454681	ENSG00000230490	LINC00464	lincRNA	NA	NA	NA	NA	NA	NA	NA	NA	1675	0.650893
chr13	35516424	35556424	+	ENST00000400445	ENSG00000172915	NBEA	protein_coding	NA	NA	NA	NA	NA	NA	NA	NA	1925	0.767283
chr13	36880934	36920934	-	ENST00000451493	ENSG00000133104	SPG20	protein_coding	NA	NA	1200	1.89681	NA	NA	1300	1.52221	NA	NA
chr13	37533504	37573504	-	ENST00000239891	ENSG00000120697	ALG5	protein_coding	NA	NA	NA	NA	1500	1.51077	NA	NA	1575	1.20765
chr13	39261266	39301266	+	ENST00000280481	ENSG00000150893	FREM2	protein_coding	NA	NA	NA	NA	NA	NA	NA	NA	1925	2.70633
chr13	41305309	41345309	-	ENST00000323563	ENSG00000102738	MRPS31	protein_coding	NA	NA	NA	NA	NA	NA	1075	0.809875	NA	NA
chr13	41553450	41593450	-	ENST00000239882	ENSG00000120690	ELF1	protein_coding	NA	NA	NA	NA	1725	2.1177	NA	NA	NA	NA
chr13	42846289	42886289	+	ENST00000025301	ENSG00000023516	AKAP11	protein_coding	NA	NA	975	0.649902	1775	1.6908	1600	1.22048	2200	1.70441
chr13	44413826	44453826	-	ENST00000444614	ENSG00000151773	CCDC122	protein_coding	NA	NA	NA	NA	NA	NA	NA	NA	1075	1.03541
chr13	46039060	46079060	+	ENST00000349995	ENSG00000136152	COG3	protein_coding	NA	NA	675	0.968651	NA	NA	625	0.640959	1875	1.51908
chr13	46716459	46756459	-	ENST00000323076	ENSG00000136167	LCP1	protein_coding	NA	NA	NA	NA	NA	NA	1375	1.98823	NA	NA
chr13	47431169	47471169	-	ENST00000543956	ENSG00000102468	HTR2A	protein_coding	NA	NA	575	0.723491	NA	NA	NA	NA	NA	NA
chr13	49935735	49975735	-	ENST00000355854	ENSG00000102547	CAB39L	protein_coding	NA	NA	NA	NA	NA	NA	NA	NA	1750	0.746231
chr13	50656307	50696307	+	ENST00000461527	ENSG00000176124	DLEU1	protein_coding	NA	NA	NA	NA	NA	NA	1175	0.894683	NA	NA
chr13	50760016	50800016	+	ENST00000475913	ENSG00000176124	DLEU1	protein_coding	NA	NA	NA	NA	NA	NA	1250	1.24903	NA	NA
chr13	64610144	64650144	-	ENST00000456627	ENSG00000227674	LINC00355	lincRNA	NA	NA	NA	NA	NA	NA	950	1.08977	NA	NA
chr13	67764468	67804468	-	ENST00000544246	ENSG00000184226	PCDH9	protein_coding	NA	NA	2300	0.794741	NA	NA	NA	NA	NA	NA
chr13	72401330	72441330	-	ENST00000313174	ENSG00000165659	DACH1	protein_coding	NA	NA	NA	NA	NA	NA	NA	NA	1575	1.13598
chr13	74668394	74708394	-	ENST00000377666	ENSG00000118922	KLF12	protein_coding	NA	NA	1225	1.76445	1800	2.72304	NA	NA	NA	NA
chr13	76209946	76249946	+	ENST00000533305	ENSG00000136153	LMO7	protein_coding	NA	NA	1875	21.9941	NA	NA	NA	NA	NA	NA
chr13	93879095	93919095	+	ENST00000377047	ENSG00000183098	GPC6	protein_coding	NA	NA	NA	NA	1700	0.577032	NA	NA	NA	NA
chr13	99896769	99936769	+	ENST00000494576	ENSG00000134882	UBAC2	protein_coding	NA	NA	450	0.911162	NA	NA	NA	NA	NA	NA
chr13	111805994	111845994	+	ENST00000491775	ENSG00000102606	ARHGEF7	protein_coding	NA	NA	1150	0.889488	NA	NA	975	0.842203	1600	1.0737
chr13	113344643	113384643	+	ENST00000375630	ENSG00000068650	ATP11A	protein_coding	NA	NA	NA	NA	NA	NA	1125	0.685182	1700	0.617514
chr14	25479503	25519503	-	ENST00000323944	ENSG00000168952	STXBP6	protein_coding	NA	NA	NA	NA	1725	2.46842	NA	NA	NA	NA
chr14	29299454	29339454	+	ENST00000551588	ENSG00000258038	CTD-2384A14.1	lincRNA	NA	NA	NA	NA	NA	NA	1025	0.912596	NA	NA
chr14	30726249	30766249	-	ENST00000508469	ENSG00000248975	CTD-2251F13.1	lincRNA	NA	NA	NA	NA	NA	NA	1175	0.549573	NA	NA
chr14	31886647	31926647	-	ENST00000549185	ENSG00000203546	RP11-176H8.1	protein_coding	NA	NA	NA	NA	NA	NA	1125	0.66377	NA	NA
chr14	35304853	35344853	-	ENST00000358716	ENSG00000198604	BAZ1A	protein_coding	NA	NA	1050	0.536826	NA	NA	1475	0.974454	1825	2.32825
chr14	35411721	35451721	-	ENST00000555015	ENSG00000258704	RP11-85K15.2	processed_transcript	NA	NA	NA	NA	1375	0.538694	NA	NA	NA	NA
chr14	36295524	36335524	+	ENST00000216807	ENSG00000100916	BRMS1L	protein_coding	NA	NA	NA	NA	NA	NA	NA	NA	1125	0.526321
chr14	37602071	37642071	-	ENST00000331299	ENSG00000183032	SLC25A21	protein_coding	NA	NA	NA	NA	NA	NA	1475	1.04205	NA	NA
chr14	39532732	39572732	-	ENST00000307712	ENSG00000100934	SEC23A	protein_coding	NA	NA	1225	2.18445	1825	2.83365	1275	0.704635	1925	1.20863
chr14	45605150	45645150	+	ENST00000267430	ENSG00000187790	FANCM	protein_coding	NA	NA	NA	NA	NA	NA	NA	NA	1900	0.586098
chr14	50115140	50155140	-	ENST00000539565	ENSG00000100479	POLE2	protein_coding	NA	NA	NA	NA	NA	NA	250	0.82457	1450	0.606387
chr14	50739266	50779266	-	ENST00000267436	ENSG00000087299	L2HGDH	protein_coding	NA	NA	NA	NA	NA	NA	NA	NA	1150	0.706089
chr14	52979240	53019240	-	ENST00000554399	ENSG00000087301	TXNDC16	protein_coding	NA	NA	NA	NA	NA	NA	950	0.53096	1975	1.40705
chr14	53019866	53059866	+	ENST00000321662	ENSG00000180998	GPR137C	protein_coding	NA	NA	NA	NA	NA	NA	NA	NA	1300	1.12933
chr14	55329570	55369570	-	ENST00000491895	ENSG00000131979	GCH1	protein_coding	NA	NA	NA	NA	NA	NA	NA	NA	1900	1.43519
chr14	55453823	55493823	-	ENST00000420358	ENSG00000198554	WDHD1	protein_coding	NA	NA	NA	NA	1700	0.912552	800	0.98327	1550	0.934507
chr14	55838576	55878576	-	ENST00000247178	ENSG00000126775	ATG14	protein_coding	NA	NA	1200	0.550151	NA	NA	NA	NA	1750	2.42631
chr14	56006810	56046810	-	ENST00000554558	ENSG00000186615	KTN1-AS1	protein_coding	NA	NA	NA	NA	NA	NA	NA	NA	1300	1.44087
chr14	56046925	56086925	+	ENST00000413890	ENSG00000126777	KTN1	protein_coding	NA	NA	1550	0.910455	NA	NA	1800	0.685881	1800	7.60805
chr14	58894103	58934103	+	ENST00000354386	ENSG00000100578	KIAA0586	protein_coding	NA	NA	NA	NA	1400	0.762737	1175	0.845981	1625	1.04643
chr14	59655364	59695364	+	ENST00000556596	ENSG00000100592	DAAM1	protein_coding	NA	NA	650	0.602311	1725	0.521827	NA	NA	2000	5.56516
chr14	60558629	60598629	+	ENST00000317623	ENSG00000126773	C14orf135	protein_coding	NA	NA	1950	2.70346	NA	NA	1950	1.45853	1500	2.0886
chr14	61447832	61487832	+	ENST00000354886	ENSG00000139974	SLC38A6	protein_coding	NA	NA	NA	NA	NA	NA	1325	1.84059	NA	NA
chr14	63670832	63710832	+	ENST00000557447	ENSG00000126785	RHOJ	protein_coding	NA	NA	1000	0.981733	NA	NA	NA	NA	NA	NA
chr14	64068579	64108579	-	ENST00000394942	ENSG00000140006	WDR89	protein_coding	NA	NA	NA	NA	NA	NA	NA	NA	1475	0.971595
chr14	64319683	64359683	+	ENST00000357395	ENSG00000054654	SYNE2	protein_coding	NA	NA	NA	NA	NA	NA	NA	NA	1725	1.37814
chr14	65306601	65346601	-	ENST00000556626	ENSG00000070182	SPTB	protein_coding	NA	NA	NA	NA	NA	NA	1525	0.656632	NA	NA
chr14	66974125	67014125	+	ENST00000315266	ENSG00000171723	GPHN	protein_coding	NA	NA	NA	NA	NA	NA	1700	0.506749	1725	1.34117
chr14	67786508	67826508	-	ENST00000554087	ENSG00000100554	ATP6V1D	protein_coding	NA	NA	1100	1.201	NA	NA	1150	0.68994	1750	2.15339
chr14	69658228	69698228	+	ENST00000409018	ENSG00000081177	EXD2	protein_coding	NA	NA	NA	NA	NA	NA	NA	NA	1900	1.28019
chr14	71236251	71276251	-	ENST00000555993	ENSG00000006432	MAP3K9	protein_coding	NA	NA	NA	NA	NA	NA	NA	NA	1600	1.8881
chr14	73836779	73876779	-	ENST00000555859	ENSG00000133961	NUMB	protein_coding	NA	NA	NA	NA	NA	NA	NA	NA	2400	1.99751
chr14	74111578	74151578	+	ENST00000554113	ENSG00000119661	DNAL1	protein_coding	NA	NA	NA	NA	1600	0.5439	NA	NA	NA	NA
chr14	74187001	74227001	-	ENST00000286523	ENSG00000156030	C14orf43	protein_coding	NA	NA	1175	0.525893	NA	NA	NA	NA	NA	NA
chr14	74318674	74358674	+	ENST00000556551	ENSG00000258653	RP5-1021I20.4	protein_coding	NA	NA	NA	NA	NA	NA	NA	NA	800	1.42101
chr14	75039306	75079306	-	ENST00000556359	ENSG00000119681	LTBP2	protein_coding	NA	NA	1600	3.92813	NA	NA	NA	NA	NA	NA
chr14	76044960	76084960	+	ENST00000238667	ENSG00000119686	FLVCR2	protein_coding	NA	NA	NA	NA	NA	NA	NA	NA	1700	1.12376
chr14	77803452	77843452	-	ENST00000216468	ENSG00000100580	TMED8	protein_coding	NA	NA	NA	NA	NA	NA	NA	NA	1825	1.61954
chr14	78266426	78306426	+	ENST00000238561	ENSG00000063761	ADCK1	protein_coding	NA	NA	NA	NA	NA	NA	NA	NA	1150	0.542575
chr14	81824927	81864927	-	ENST00000267540	ENSG00000140022	STON2	protein_coding	NA	NA	NA	NA	NA	NA	NA	NA	1025	0.567227
chr14	81862809	81902809	-	ENST00000557055	ENSG00000140022	STON2	protein_coding	NA	NA	NA	NA	NA	NA	1925	1.48148	NA	NA
chr14	88420009	88460009	-	ENST00000393569	ENSG00000054983	GALC	protein_coding	NA	NA	NA	NA	NA	NA	1325	0.544954	NA	NA
chr14	88981077	89021077	-	ENST00000556564	ENSG00000070778	PTPN21	protein_coding	NA	NA	450	0.736273	NA	NA	NA	NA	NA	NA
chr14	89843456	89883456	-	ENST00000557258	ENSG00000053254	FOXN3	protein_coding	NA	NA	NA	NA	NA	NA	NA	NA	1100	1.55246
chr14	91486980	91526980	-	ENST00000554206	ENSG00000100784	RPS6KA5	protein_coding	NA	NA	NA	NA	NA	NA	1500	0.55671	1575	1.0737
chr14	91580357	91620357	+	ENST00000298858	ENSG00000133943	C14orf159	protein_coding	NA	NA	NA	NA	1300	0.593497	NA	NA	NA	NA
chr14	91844121	91884121	-	ENST00000389857	ENSG00000015133	CCDC88C	protein_coding	NA	NA	NA	NA	NA	NA	NA	NA	1125	0.789972
chr14	92262870	92302870	-	ENST00000556018	ENSG00000165929	TC2N	protein_coding	NA	NA	NA	NA	NA	NA	NA	NA	2100	2.01726
chr14	92466403	92506403	-	ENST00000267622	ENSG00000100815	TRIP11	protein_coding	NA	NA	NA	NA	1300	1.40287	NA	NA	800	1.38425
chr14	93175047	93215047	-	ENST00000334869	ENSG00000100600	LGMN	protein_coding	NA	NA	NA	NA	NA	NA	NA	NA	1225	0.611732
chr14	95584347	95624347	-	ENST00000526495	ENSG00000100697	DICER1	protein_coding	NA	NA	1650	1.02388	NA	NA	NA	NA	2325	4.05808
chr14	100437786	100477786	+	ENST00000402714	ENSG00000196405	EVL	protein_coding	NA	NA	NA	NA	1900	0.581415	1950	0.506749	2075	2.49885
chr14	103851729	103891729	+	ENST00000440884	ENSG00000075413	MARK3	protein_coding	NA	NA	NA	NA	NA	NA	1700	1.14561	NA	NA
chr14	104273927	104313927	-	ENST00000202556	ENSG00000088808	PPP1R13B	protein_coding	NA	NA	NA	NA	NA	NA	NA	NA	1575	1.4353
chr14	105864916	105904916	+	ENST00000548638	ENSG00000226174	TEX22	protein_coding	NA	NA	NA	NA	NA	NA	NA	NA	3475	0.801099
chr15	23810864	23850864	+	ENST00000568252	ENSG00000179455	MKRN3	protein_coding	NA	NA	NA	NA	1225	0.629076	1250	1.54152	NA	NA
chr15	31243807	31283807	-	ENST00000435680	ENSG00000166912	MTMR10	protein_coding	NA	NA	1275	1.09299	NA	NA	1175	0.619966	2000	1.37967
chr15	34462297	34502297	-	ENST00000560247	ENSG00000134152	C15orf29	protein_coding	NA	NA	NA	NA	1675	1.67298	1350	0.656632	1600	1.00726
chr15	35798369	35838369	-	ENST00000256538	ENSG00000134146	ATPBD4	protein_coding	NA	NA	NA	NA	1750	0.624003	1450	0.697357	1925	0.841023
chr15	38817776	38857776	-	ENST00000561180	ENSG00000172575	RASGRP1	protein_coding	NA	NA	NA	NA	NA	NA	NA	NA	2225	6.17394
chr15	40453227	40493227	+	ENST00000287598	ENSG00000156970	BUB1B	protein_coding	NA	NA	NA	NA	NA	NA	1500	2.04323	NA	NA
chr15	41523037	41563037	+	ENST00000558351	ENSG00000187446	CHP1	protein_coding	NA	NA	NA	NA	NA	NA	NA	NA	1475	0.723215
chr15	42565856	42605856	+	ENST00000566442	ENSG00000214013	GANC	protein_coding	NA	NA	NA	NA	1500	0.666814	NA	NA	NA	NA
chr15	42709730	42749730	-	ENST00000263805	ENSG00000103994	ZFP106	protein_coding	NA	NA	950	1.99183	NA	NA	NA	NA	NA	NA
chr15	43173007	43213007	-	ENST00000567840	ENSG00000128881	TTBK2	protein_coding	NA	NA	NA	NA	NA	NA	1375	0.535298	NA	NA
chr15	44447450	44487450	-	ENST00000451277	ENSG00000171877	FRMD5	protein_coding	NA	NA	1200	1.24444	1275	0.558853	NA	NA	NA	NA
chr15	44719432	44759432	+	ENST00000260327	ENSG00000137770	CTDSPL2	protein_coding	NA	NA	NA	NA	NA	NA	1700	1.78377	NA	NA
chr15	44915876	44955876	-	ENST00000558319	ENSG00000104133	SPG11	protein_coding	NA	NA	725	0.648297	NA	NA	925	2.05695	NA	NA
chr15	49447853	49487853	+	ENST00000559883	ENSG00000156958	GALK2	protein_coding	NA	NA	NA	NA	1800	0.789639	2225	0.728006	NA	NA
chr15	49715293	49755293	+	ENST00000267843	ENSG00000140285	FGF7	protein_coding	NA	NA	1100	5.2495	1850	3.16716	NA	NA	NA	NA
chr15	49873128	49913128	-	ENST00000299338	ENSG00000166262	C15orf33	protein_coding	NA	NA	NA	NA	NA	NA	650	0.596035	NA	NA
chr15	50716579	50756579	+	ENST00000433963	ENSG00000138592	USP8	protein_coding	NA	NA	NA	NA	NA	NA	1650	1.79007	NA	NA
chr15	51018005	51058005	-	ENST00000261854	ENSG00000138600	SPPL2A	protein_coding	NA	NA	1875	0.977164	NA	NA	1850	1.20425	1950	2.96736
chr15	51329685	51369685	+	ENST00000559909	ENSG00000259240	RP11-108K3.1	lincRNA	NA	NA	NA	NA	NA	NA	1450	0.820791	NA	NA
chr15	51875030	51915030	-	ENST00000251076	ENSG00000104093	DMXL2	protein_coding	NA	NA	NA	NA	1175	0.546125	950	0.820791	1500	1.22379
chr15	52121827	52161827	+	ENST00000308580	ENSG00000138594	TMOD3	protein_coding	NA	NA	NA	NA	NA	NA	1850	1.27044	NA	NA
chr15	52432198	52472198	-	ENST00000358784	ENSG00000069966	GNB5	protein_coding	NA	NA	NA	NA	1850	0.535734	NA	NA	NA	NA
chr15	55660708	55700708	-	ENST00000310958	ENSG00000260916	CCPG1	protein_coding	NA	NA	NA	NA	NA	NA	1500	4.41016	1375	0.615223
chr15	56169329	56209329	-	ENST00000338963	ENSG00000069869	NEDD4	protein_coding	NA	NA	1000	2.961	1050	2.43645	NA	NA	NA	NA
chr15	56536207	56576207	+	ENST00000560827	ENSG00000151575	TEX9	protein_coding	NA	NA	NA	NA	NA	NA	1300	0.535298	NA	NA
chr15	58318616	58358616	-	ENST00000249750	ENSG00000128918	ALDH1A2	protein_coding	NA	NA	NA	NA	NA	NA	1725	3.29408	NA	NA
chr15	59063391	59103391	+	ENST00000316848	ENSG00000128923	FAM63B	protein_coding	NA	NA	NA	NA	NA	NA	975	0.630183	NA	NA
chr15	59185852	59225852	-	ENST00000380516	ENSG00000137776	SLTM	protein_coding	NA	NA	925	1.16345	NA	NA	1050	2.65116	NA	NA
chr15	60731359	60771359	-	ENST00000558181	ENSG00000128915	NARG2	protein_coding	NA	NA	NA	NA	1575	1.41131	1225	1.44426	1500	0.512032
chr15	60845325	60885325	-	ENST00000559343	ENSG00000069667	RORA	protein_coding	NA	NA	NA	NA	1275	0.502202	NA	NA	NA	NA
chr15	61481518	61521518	-	ENST00000335670	ENSG00000069667	RORA	protein_coding	NA	NA	1200	0.661487	NA	NA	NA	NA	NA	NA
chr15	63634360	63674360	-	ENST00000178638	ENSG00000074410	CA12	protein_coding	NA	NA	NA	NA	NA	NA	NA	NA	1600	3.74959
chr15	63796793	63836793	+	ENST00000561442	ENSG00000140455	USP3	protein_coding	NA	NA	NA	NA	NA	NA	1950	2.69791	NA	NA
chr15	64680003	64720003	+	ENST00000261884	ENSG00000103671	TRIP4	protein_coding	NA	NA	350	0.596192	NA	NA	200	0.604433	1325	0.671837
chr15	64752941	64792941	+	ENST00000416172	ENSG00000259220	RP11-702L15.2	protein_coding	NA	NA	NA	NA	NA	NA	750	1.49086	1600	1.10893
chr15	65770042	65810042	-	ENST00000321147	ENSG00000074603	DPP8	protein_coding	NA	NA	NA	NA	1325	2.04761	NA	NA	NA	NA
chr15	66874528	66914528	+	ENST00000558797	ENSG00000259471	RP11-321F6.1	protein_coding	NA	NA	NA	NA	NA	NA	1400	1.99789	NA	NA
chr15	67507533	67547533	-	ENST00000542650	ENSG00000103591	AAGAB	protein_coding	NA	NA	975	0.529211	1600	1.14461	1250	1.20327	2025	1.57569
chr15	69452973	69492973	+	ENST00000261858	ENSG00000138604	GLCE	protein_coding	NA	NA	NA	NA	NA	NA	1650	0.713731	NA	NA
chr15	70350515	70390515	-	ENST00000558939	ENSG00000140332	TLE3	protein_coding	NA	NA	NA	NA	NA	NA	1250	0.846681	1775	3.81231
chr15	71389291	71429291	+	ENST00000355327	ENSG00000187720	THSD4	protein_coding	NA	NA	NA	NA	NA	NA	NA	NA	3700	0.74274
chr15	72628322	72668322	-	ENST00000379915	ENSG00000260729	RP11-106M3.2	processed_transcript	NA	NA	875	0.902025	NA	NA	1075	0.694698	2050	2.73164
chr15	72978527	73018527	+	ENST00000566400	ENSG00000140463	BBS4	protein_coding	NA	NA	NA	NA	1650	0.52096	1075	0.600094	NA	NA
chr15	74287014	74327014	+	ENST00000395135	ENSG00000140464	PML	protein_coding	NA	NA	1300	1.17963	NA	NA	NA	NA	NA	NA
chr15	74833518	74873518	+	ENST00000346246	ENSG00000179361	ARID3B	protein_coding	NA	NA	NA	NA	1450	0.622913	1100	0.55629	NA	NA
chr15	75704045	75744045	-	ENST00000394947	ENSG00000169375	SIN3A	protein_coding	NA	NA	875	0.506258	NA	NA	NA	NA	NA	NA
chr15	75708183	75748183	-	ENST00000564778	ENSG00000169375	SIN3A	protein_coding	NA	NA	NA	NA	NA	NA	1300	0.840243	NA	NA
chr15	76135622	76175622	+	ENST00000338677	ENSG00000140367	UBE2Q2	protein_coding	NA	NA	1675	1.24424	NA	NA	1250	1.27534	2025	1.07566
chr15	76563813	76603813	-	ENST00000560044	ENSG00000140374	ETFA	protein_coding	NA	NA	1175	0.928268	NA	NA	1525	1.6059	1975	1.98159
chr15	80176096	80216096	-	ENST00000494999	ENSG00000259332	RP11-38G5.1	protein_coding	NA	NA	NA	NA	NA	NA	725	1.3204	NA	NA
chr15	80987644	81027644	+	ENST00000258884	ENSG00000136379	FAM108C1	protein_coding	NA	NA	1225	0.721179	1800	1.37194	NA	NA	2100	1.7355
chr15	82123466	82163466	-	ENST00000560097	ENSG00000259692	RP11-499F3.2	lincRNA	NA	NA	NA	NA	NA	NA	475	1.23545	NA	NA
chr15	82515104	82555104	-	ENST00000268206	ENSG00000140598	EFTUD1	protein_coding	NA	NA	NA	NA	1650	1.13733	NA	NA	NA	NA
chr15	83276728	83316728	-	ENST00000568128	ENSG00000214575	CPEB1	protein_coding	NA	NA	NA	NA	NA	NA	1275	1.34783	NA	NA
chr15	83581480	83621480	-	ENST00000304231	ENSG00000103942	HOMER2	protein_coding	NA	NA	NA	NA	NA	NA	NA	NA	1550	0.634204
chr15	83696106	83736106	-	ENST00000261721	ENSG00000064726	BTBD1	protein_coding	NA	NA	1250	1.12652	NA	NA	1800	3.08794	NA	NA
chr15	85291866	85331866	+	ENST00000560079	ENSG00000166716	ZNF592	protein_coding	NA	NA	900	0.707636	NA	NA	1500	0.721148	NA	NA
chr15	88207083	88247083	-	ENST00000560439	ENSG00000259560	RP11-648K4.2	lincRNA	NA	NA	NA	NA	NA	NA	1125	1.74052	NA	NA
chr15	90118713	90158713	+	ENST00000268138	ENSG00000140534	C15orf42	protein_coding	NA	NA	NA	NA	1550	0.728093	1300	1.66621	1475	0.862294
chr15	90728152	90768152	+	ENST00000379122	ENSG00000185033	SEMA4B	protein_coding	NA	NA	NA	NA	NA	NA	575	0.528021	NA	NA
chr15	91260558	91300558	+	ENST00000355112	ENSG00000197299	BLM	protein_coding	NA	NA	NA	NA	NA	NA	400	0.970674	NA	NA
chr15	101990187	102030187	-	ENST00000398181	ENSG00000140479	PCSK6	protein_coding	NA	NA	NA	NA	NA	NA	NA	NA	2200	0.912363
chr15	102224807	102264807	-	ENST00000335968	ENSG00000185418	TARSL2	protein_coding	NA	NA	NA	NA	1350	0.628765	NA	NA	NA	NA
chr16	148859	188859	-	ENST00000405960	ENSG00000103148	NPRL3	protein_coding	NA	NA	NA	NA	NA	NA	150	0.626824	NA	NA
chr16	3493611	3533611	+	ENST00000407558	ENSG00000122390	NAA60	protein_coding	NA	NA	NA	NA	NA	NA	NA	NA	2675	0.977922
chr16	8768422	8808422	+	ENST00000268251	ENSG00000183044	ABAT	protein_coding	NA	NA	NA	NA	NA	NA	NA	NA	2175	1.08035
chr16	10479912	10519912	+	ENST00000396559	ENSG00000166669	ATF7IP2	protein_coding	NA	NA	NA	NA	NA	NA	1150	3.93448	1300	0.995811
chr16	11796734	11836734	-	ENST00000283033	ENSG00000153066	TXNDC11	protein_coding	NA	NA	NA	NA	1750	2.1493	NA	NA	NA	NA
chr16	11851123	11891123	-	ENST00000355758	ENSG00000122299	ZC3H7A	protein_coding	NA	NA	1125	1.58646	1825	2.48996	1150	1.29703	1825	1.45799
chr16	11969939	12009939	-	ENST00000420576	ENSG00000103342	GSPT1	protein_coding	NA	NA	1250	1.74512	NA	NA	1250	2.57335	1975	3.46598
chr16	12995477	13035477	+	ENST00000424107	ENSG00000237515	SHISA9	protein_coding	NA	NA	NA	NA	NA	NA	NA	NA	1100	0.617514
chr16	14165178	14205178	+	ENST00000574998	ENSG00000186260	MKL2	protein_coding	NA	NA	NA	NA	NA	NA	NA	NA	1775	1.55388
chr16	14684133	14724133	-	ENST00000341484	ENSG00000140694	PARN	protein_coding	NA	NA	675	0.593935	NA	NA	NA	NA	NA	NA
chr16	18897776	18937776	-	ENST00000446231	ENSG00000157106	SMG1	protein_coding	NA	NA	NA	NA	1900	0.653997	NA	NA	NA	NA
chr16	19125324	19165324	+	ENST00000564808	ENSG00000261427	CTD-2349B8.1	protein_coding	NA	NA	800	3.05874	1125	0.968447	NA	NA	NA	NA
chr16	20685832	20725832	+	ENST00000501740	ENSG00000005187	ACSM3	protein_coding	NA	NA	NA	NA	NA	NA	1500	3.39386	NA	NA
chr16	21274404	21314404	-	ENST00000576703	ENSG00000103316	CRYM	protein_coding	NA	NA	NA	NA	1450	1.35506	NA	NA	NA	NA
chr16	21491765	21531765	-	ENST00000522841	ENSG00000180747	CTD-2547E10.2	pseudogene	NA	NA	1225	0.552925	NA	NA	NA	NA	NA	NA
chr16	23481815	23521815	-	ENST00000309859	ENSG00000103365	GGA2	protein_coding	NA	NA	NA	NA	1975	1.11343	NA	NA	NA	NA
chr16	31724550	31764550	+	ENST00000529943	ENSG00000197302	ZNF720	protein_coding	NA	NA	NA	NA	1350	1.08371	NA	NA	NA	NA
chr16	47137908	47177908	-	ENST00000562435	ENSG00000171208	NETO2	protein_coding	NA	NA	NA	NA	NA	NA	1875	0.849341	NA	NA
chr16	48604120	48644120	-	ENST00000262384	ENSG00000102921	N4BP1	protein_coding	NA	NA	NA	NA	NA	NA	1425	0.942125	1975	0.895673
chr16	50280048	50320048	+	ENST00000564965	ENSG00000121281	ADCY7	protein_coding	NA	NA	NA	NA	NA	NA	1150	0.670907	NA	NA
chr16	53164833	53204833	+	ENST00000564845	ENSG00000177200	CHD9	protein_coding	NA	NA	NA	NA	1250	2.25521	NA	NA	NA	NA
chr16	53241901	53281901	+	ENST00000565803	ENSG00000177200	CHD9	protein_coding	NA	NA	NA	NA	1400	2.99884	NA	NA	NA	NA
chr16	53468332	53508332	+	ENST00000262133	ENSG00000103479	RBL2	protein_coding	NA	NA	NA	NA	1600	0.961882	1050	1.28989	2050	2.70469
chr16	57023397	57063397	+	ENST00000539881	ENSG00000140853	NLRC5	protein_coding	NA	NA	800	0.759388	1375	1.207	NA	NA	NA	NA
chr16	57220203	57260203	+	ENST00000394420	ENSG00000159579	RSPRY1	protein_coding	NA	NA	950	1.09505	NA	NA	875	0.789303	NA	NA
chr16	58191824	58231824	-	ENST00000262506	ENSG00000070770	CSNK2A2	protein_coding	NA	NA	875	0.983474	1775	2.1728	NA	NA	1750	1.20307
chr16	66690610	66730610	-	ENST00000394106	ENSG00000183723	CMTM4	protein_coding	NA	NA	NA	NA	NA	NA	1000	0.535298	1525	0.650784
chr16	67475140	67515140	-	ENST00000290949	ENSG00000159720	ATP6V0D1	protein_coding	NA	NA	1450	0.721696	NA	NA	NA	NA	NA	NA
chr16	67713324	67753324	-	ENST00000268797	ENSG00000141098	GFOD2	protein_coding	NA	NA	NA	NA	1325	0.578255	NA	NA	NA	NA
chr16	68056859	68096859	+	ENST00000565263	ENSG00000167264	DUS2L	protein_coding	NA	NA	NA	NA	NA	NA	375	0.563848	1050	0.533957
chr16	68344959	68384959	+	ENST00000449359	ENSG00000132600	PRMT7	protein_coding	NA	NA	NA	NA	875	0.564482	1125	0.599534	1225	0.677618
chr16	68678739	68718739	+	ENST00000264012	ENSG00000062038	CDH3	protein_coding	NA	NA	NA	NA	NA	NA	NA	NA	1700	0.556319
chr16	69796209	69836209	+	ENST00000359154	ENSG00000198373	WWP2	protein_coding	NA	NA	NA	NA	NA	NA	NA	NA	1825	1.25172
chr16	70433140	70473140	-	ENST00000566097	ENSG00000157350	ST3GAL2	protein_coding	NA	NA	NA	NA	NA	NA	725	2.16974	NA	NA
chr16	70517468	70557468	-	ENST00000323786	ENSG00000103051	COG4	protein_coding	NA	NA	NA	NA	NA	NA	300	0.922673	1525	0.67751
chr16	71879899	71919899	+	ENST00000568581	ENSG00000261750	RP11-498D10.4	protein_coding	NA	NA	NA	NA	1400	0.691512	1150	0.585259	1425	0.979122
chr16	72087456	72127456	-	ENST00000562153	ENSG00000140830	TXNL4B	protein_coding	NA	NA	NA	NA	NA	NA	900	0.55671	1100	0.659292
chr16	72658908	72698908	-	ENST00000570035	ENSG00000261008	AC004158.2	processed_transcript	NA	NA	NA	NA	NA	NA	1300	1.00636	NA	NA
chr16	72699069	72739069	+	ENST00000563328	ENSG00000259768	RP5-991G20.1	processed_transcript	NA	NA	NA	NA	NA	NA	925	0.749418	NA	NA
chr16	74601012	74641012	-	ENST00000205061	ENSG00000090863	GLG1	protein_coding	NA	NA	900	0.593935	1575	1.36289	850	0.999224	1700	0.852913
chr16	74660779	74700779	-	ENST00000361070	ENSG00000168411	RFWD3	protein_coding	NA	NA	NA	NA	NA	NA	1025	2.97822	NA	NA
chr16	75427383	75467383	-	ENST00000283882	ENSG00000153774	CFDP1	protein_coding	NA	NA	NA	NA	1450	0.866137	NA	NA	NA	NA
chr16	75458604	75498604	-	ENST00000567194	ENSG00000261717	RP11-77K12.1	protein_coding	NA	NA	NA	NA	NA	NA	2150	0.784965	NA	NA
chr16	78133310	78173310	+	ENST00000566780	ENSG00000186153	WWOX	protein_coding	NA	NA	NA	NA	NA	NA	NA	NA	2300	1.0341
chr16	82660408	82700408	+	ENST00000566620	ENSG00000140945	CDH13	protein_coding	NA	NA	400	0.740923	NA	NA	NA	NA	NA	NA
chr16	84402133	84442133	+	ENST00000262429	ENSG00000064270	ATP2C2	protein_coding	NA	NA	NA	NA	NA	NA	NA	NA	1250	0.578571
chr16	87759582	87799582	-	ENST00000347925	ENSG00000104731	KLHDC4	protein_coding	NA	NA	NA	NA	NA	NA	450	0.652714	1150	0.878984
chr16	88968252	89008252	-	ENST00000569443	ENSG00000129993	CBFA2T3	protein_coding	NA	NA	NA	NA	NA	NA	NA	NA	2225	0.539629
chr16	89003612	89043612	-	ENST00000268679	ENSG00000129993	CBFA2T3	protein_coding	NA	NA	NA	NA	NA	NA	1850	1.36309	NA	NA
chr17	1492180	1532180	-	ENST00000574743	ENSG00000167703	SLC43A2	protein_coding	NA	NA	NA	NA	NA	NA	NA	NA	1775	0.572899
chr17	1888178	1928178	-	ENST00000331238	ENSG00000185924	RTN4RL1	protein_coding	NA	NA	NA	NA	NA	NA	NA	NA	1850	1.19718
chr17	2240806	2280806	+	ENST00000268989	ENSG00000141258	SGSM2	protein_coding	NA	NA	NA	NA	NA	NA	NA	NA	1150	0.57519
chr17	3499543	3539543	-	ENST00000572919	ENSG00000262304	RP11-235E17.2	protein_coding	NA	NA	NA	NA	NA	NA	NA	NA	1300	0.801863
chr17	3827736	3867736	-	ENST00000397039	ENSG00000074370	ATP2A3	protein_coding	NA	NA	NA	NA	NA	NA	300	2.28212	NA	NA
chr17	4229923	4269923	-	ENST00000571980	ENSG00000132388	UBE2G1	protein_coding	NA	NA	NA	NA	NA	NA	1275	0.628083	1750	1.33517
chr17	5447851	5487851	-	ENST00000262467	ENSG00000091592	NLRP1	protein_coding	NA	NA	NA	NA	1725	1.59441	NA	NA	NA	NA
chr17	6757180	6797180	+	ENST00000574727	ENSG00000262943	ALOX12P2	pseudogene	NA	NA	NA	NA	NA	NA	NA	NA	2000	1.93675
chr17	8494079	8534079	-	ENST00000360416	ENSG00000133026	MYH10	protein_coding	NA	NA	NA	NA	2000	0.797248	1000	1.02945	1425	0.517594
chr17	9548015	9588015	+	ENST00000570827	ENSG00000154914	USP43	protein_coding	NA	NA	NA	NA	NA	NA	NA	NA	1825	0.723214
chr17	15903049	15943049	+	ENST00000395886	ENSG00000011295	TTC19	protein_coding	NA	NA	875	0.828789	NA	NA	1050	1.01098	NA	NA
chr17	19140389	19180389	+	ENST00000584633	ENSG00000072134	EPN2	protein_coding	NA	NA	850	0.543815	1575	1.05516	NA	NA	1325	0.560573
chr17	19841150	19881150	-	ENST00000225737	ENSG00000108599	AKAP10	protein_coding	NA	NA	NA	NA	NA	NA	1375	1.26456	NA	NA
chr17	21029965	21069965	+	ENST00000395511	ENSG00000109016	DHRS7B	protein_coding	NA	NA	NA	NA	NA	NA	425	0.570985	NA	NA
chr17	25783670	25823670	+	ENST00000319524	ENSG00000141068	KSR1	protein_coding	NA	NA	NA	NA	NA	NA	800	1.16338	NA	NA
chr17	26180391	26220391	-	ENST00000582441	ENSG00000266202	RP1-66C13.4	protein_coding	NA	NA	NA	NA	NA	NA	1525	0.513887	NA	NA
chr17	27129857	27169857	-	ENST00000583522	ENSG00000173065	FAM222B	protein_coding	NA	NA	1150	0.609354	NA	NA	1600	1.6059	NA	NA
chr17	27238789	27278789	-	ENST00000332830	ENSG00000109118	PHF12	protein_coding	NA	NA	1275	1.04909	NA	NA	1575	1.55593	1875	1.8136
chr17	27467430	27507430	-	ENST00000527372	ENSG00000196535	MYO18A	protein_coding	NA	NA	NA	NA	NA	NA	1450	0.53068	NA	NA
chr17	29058904	29098904	+	ENST00000578195	ENSG00000264538	SUZ12P1	pseudogene	NA	NA	NA	NA	1550	0.742733	NA	NA	NA	NA
chr17	29111794	29151794	-	ENST00000324238	ENSG00000176390	CRLF3	protein_coding	NA	NA	NA	NA	NA	NA	550	0.895942	NA	NA
chr17	29158988	29198988	+	ENST00000578295	ENSG00000176208	ATAD5	protein_coding	NA	NA	NA	NA	NA	NA	700	2.82344	NA	NA
chr17	33376338	33416338	-	ENST00000315249	ENSG00000092871	RFFL	protein_coding	NA	NA	NA	NA	1900	1.09953	NA	NA	NA	NA
chr17	33914282	33954282	+	ENST00000312678	ENSG00000006125	AP2B1	protein_coding	NA	NA	NA	NA	NA	NA	1675	3.88802	NA	NA
chr17	35929486	35969486	-	ENST00000339208	ENSG00000006114	SYNRG	protein_coding	NA	NA	NA	NA	1775	1.43109	NA	NA	NA	NA
chr17	40388725	40428725	-	ENST00000415845	ENSG00000173757	STAT5B	protein_coding	NA	NA	675	0.711389	1125	0.695918	NA	NA	NA	NA
chr17	42785976	42825976	+	ENST00000393547	ENSG00000161692	DBF4B	protein_coding	NA	NA	NA	NA	NA	NA	875	0.658032	NA	NA
chr17	43971748	44011748	+	ENST00000344290	ENSG00000186868	MAPT	protein_coding	NA	NA	NA	NA	NA	NA	NA	NA	1825	0.556319
chr17	45226632	45266632	-	ENST00000066544	ENSG00000004897	CDC27	protein_coding	NA	NA	NA	NA	NA	NA	1350	4.09192	1950	1.72841
chr17	46627634	46667634	-	ENST00000498678	ENSG00000120093	HOXB3	protein_coding	NA	NA	1950	6.7689	NA	NA	NA	NA	NA	NA
chr17	47801529	47841529	-	ENST00000240364	ENSG00000121104	FAM117A	protein_coding	NA	NA	NA	NA	NA	NA	1100	2.755	NA	NA
chr17	47865917	47905917	+	ENST00000259021	ENSG00000136504	KAT7	protein_coding	NA	NA	1050	0.994868	NA	NA	1300	1.45083	NA	NA
chr17	48712218	48752218	+	ENST00000285238	ENSG00000108846	ABCC3	protein_coding	NA	NA	2000	0.685826	NA	NA	NA	NA	NA	NA
chr17	53828455	53868455	+	ENST00000573500	ENSG00000141179	PCTP	protein_coding	NA	NA	NA	NA	NA	NA	600	0.516685	NA	NA
chr17	56769934	56809934	+	ENST00000337432	ENSG00000108384	RAD51C	protein_coding	NA	NA	NA	NA	NA	NA	325	1.43026	1575	4.36951
chr17	56833230	56873230	+	ENST00000308249	ENSG00000175175	PPM1E	protein_coding	NA	NA	NA	NA	NA	NA	875	1.06612	1150	0.710125
chr17	57144282	57184282	-	ENST00000393066	ENSG00000108395	TRIM37	protein_coding	NA	NA	NA	NA	NA	NA	NA	NA	1450	29.4871
chr17	57409050	57449050	+	ENST00000581865	ENSG00000175155	YPEL2	protein_coding	NA	NA	NA	NA	NA	NA	NA	NA	1725	0.801099
chr17	57784863	57824863	+	ENST00000262291	ENSG00000062716	VMP1	protein_coding	NA	NA	1625	0.79485	NA	NA	NA	NA	2125	5.39084
chr17	59965377	60005377	-	ENST00000444766	ENSG00000108506	INTS2	protein_coding	NA	NA	NA	NA	NA	NA	325	0.76859	NA	NA
chr17	60558129	60598129	+	ENST00000542523	ENSG00000146872	TLK2	protein_coding	NA	NA	NA	NA	1675	0.524141	NA	NA	NA	NA
chr17	60704762	60744762	+	ENST00000303375	ENSG00000011028	MRC2	protein_coding	NA	NA	1800	1.87519	1675	1.90937	NA	NA	NA	NA
chr17	64961026	65001026	+	ENST00000262138	ENSG00000075461	CACNG4	protein_coding	NA	NA	NA	NA	NA	NA	NA	NA	1875	0.576281
chr17	66287659	66327659	+	ENST00000452479	ENSG00000141337	ARSG	protein_coding	NA	NA	NA	NA	NA	NA	NA	NA	875	1.31739
chr17	73623269	73663269	-	ENST00000317905	ENSG00000108469	RECQL5	protein_coding	NA	NA	NA	NA	NA	NA	500	0.633401	750	0.569627
chr17	73663196	73703196	+	ENST00000584667	ENSG00000161526	SAP30BP	protein_coding	NA	NA	1150	0.849457	NA	NA	1125	0.843182	NA	NA
chr17	74196390	74236390	-	ENST00000269391	ENSG00000141576	RNF157	protein_coding	NA	NA	NA	NA	NA	NA	900	0.620946	NA	NA
chr17	75277492	75317492	+	ENST00000427177	ENSG00000184640	SEPT9	protein_coding	NA	NA	NA	NA	NA	NA	NA	NA	1700	2.06394
chr17	75369272	75409272	+	ENST00000423034	ENSG00000184640	SEPT9	protein_coding	NA	NA	NA	NA	1400	1.39066	NA	NA	NA	NA
chr17	76738376	76778376	-	ENST00000361101	ENSG00000108669	CYTH1	protein_coding	NA	NA	NA	NA	1800	1.12767	1075	0.735143	1700	0.615442
chr17	78234665	78274665	+	ENST00000508628	ENSG00000173821	RNF213	protein_coding	NA	NA	2025	0.555753	1050	0.656957	NA	NA	200	0.956869
chr18	460722	500722	-	ENST00000400256	ENSG00000158270	COLEC12	protein_coding	NA	NA	NA	NA	1725	1.41188	NA	NA	NA	NA
chr18	976590	1016590	+	ENST00000577719	ENSG00000263551	RP11-78F17.1	lincRNA	NA	NA	NA	NA	NA	NA	950	0.816312	NA	NA
chr18	1509184	1549184	+	ENST00000583163	ENSG00000266602	RP11-476K15.1	processed_transcript	NA	NA	NA	NA	NA	NA	700	0.730525	NA	NA
chr18	8705659	8745659	+	ENST00000306329	ENSG00000168502	SOGA2	protein_coding	NA	NA	1900	3.8439	NA	NA	NA	NA	NA	NA
chr18	9102734	9142734	+	ENST00000578850	ENSG00000265257	RP11-21J18.1	processed_transcript	NA	NA	NA	NA	NA	NA	1250	6.14243	NA	NA
chr18	9574567	9614567	-	ENST00000400555	ENSG00000154845	PPP4R1	protein_coding	NA	NA	1100	1.98307	NA	NA	1100	2.29947	1975	1.07915
chr18	18822203	18862203	+	ENST00000424526	ENSG00000141449	GREB1L	protein_coding	NA	NA	700	0.581207	1675	0.581994	NA	NA	950	0.635403
chr18	19244766	19284766	-	ENST00000289119	ENSG00000158201	ABHD3	protein_coding	NA	NA	NA	NA	NA	NA	425	1.15848	NA	NA
chr18	20513278	20553278	+	ENST00000327155	ENSG00000101773	RBBP8	protein_coding	NA	NA	NA	NA	NA	NA	1150	0.921553	2025	3.27814
chr18	20714528	20754528	+	ENST00000400473	ENSG00000134508	CABLES1	protein_coding	NA	NA	NA	NA	NA	NA	NA	NA	1775	1.83029
chr18	21202851	21242851	-	ENST00000322980	ENSG00000154065	ANKRD29	protein_coding	NA	NA	NA	NA	1125	0.524898	NA	NA	NA	NA
chr18	22892154	22932154	-	ENST00000579111	ENSG00000198795	ZNF521	protein_coding	NA	NA	800	0.831508	NA	NA	NA	NA	NA	NA
chr18	23631181	23671181	-	ENST00000542420	ENSG00000141380	SS18	protein_coding	NA	NA	NA	NA	NA	NA	1400	2.58945	NA	NA
chr18	32073254	32113254	+	ENST00000283365	ENSG00000134769	DTNA	protein_coding	NA	NA	NA	NA	NA	NA	NA	NA	1975	2.11652
chr18	33877702	33917702	+	ENST00000257209	ENSG00000134775	FHOD3	protein_coding	NA	NA	1525	0.873932	NA	NA	NA	NA	NA	NA
chr18	34409069	34449069	+	ENST00000543923	ENSG00000150477	KIAA1328	protein_coding	NA	NA	NA	NA	1700	0.620777	575	0.773909	NA	NA
chr18	47681451	47721451	-	ENST00000285039	ENSG00000167306	MYO5B	protein_coding	NA	NA	NA	NA	NA	NA	NA	NA	2075	0.923489
chr18	48405419	48445419	+	ENST00000321341	ENSG00000082212	ME2	protein_coding	NA	NA	NA	NA	1300	0.566351	NA	NA	NA	NA
chr18	51711158	51751158	-	ENST00000256429	ENSG00000134046	MBD2	protein_coding	NA	NA	2025	1.44119	2175	3.4558	1375	0.804277	2150	1.93959
chr18	53138000	53178000	-	ENST00000543082	ENSG00000196628	TCF4	protein_coding	NA	NA	NA	NA	1525	1.40312	NA	NA	NA	NA
chr18	55102917	55142917	+	ENST00000491143	ENSG00000119547	ONECUT2	protein_coding	NA	NA	NA	NA	NA	NA	NA	NA	1475	1.541
chr18	59814289	59854289	-	ENST00000357637	ENSG00000197563	PIGN	protein_coding	NA	NA	NA	NA	NA	NA	1000	0.648655	NA	NA
chr18	60947361	60987361	-	ENST00000398117	ENSG00000171791	BCL2	protein_coding	NA	NA	NA	NA	NA	NA	NA	NA	1775	7.58885
chr18	67956137	67996137	+	ENST00000397942	ENSG00000170677	SOCS6	protein_coding	NA	NA	1550	2.36736	1675	5.01999	NA	NA	1550	0.962431
chr18	70891715	70931715	-	ENST00000581011	ENSG00000263711	RP11-169F17.1	protein_coding	NA	NA	NA	NA	NA	NA	1825	4.16106	NA	NA
chr18	74536116	74576116	+	ENST00000543926	ENSG00000130856	ZNF236	protein_coding	NA	NA	NA	NA	NA	NA	900	0.521863	NA	NA
chr19	1134282	1174282	-	ENST00000361757	ENSG00000064932	SBNO2	protein_coding	NA	NA	NA	NA	NA	NA	NA	NA	775	0.591879
chr19	4969124	5009124	+	ENST00000159111	ENSG00000127663	KDM4B	protein_coding	NA	NA	NA	NA	NA	NA	NA	NA	1225	1.95912
chr19	7254011	7294011	-	ENST00000302850	ENSG00000171105	INSR	protein_coding	NA	NA	NA	NA	NA	NA	NA	NA	1325	0.778846
chr19	11071598	11111598	+	ENST00000429416	ENSG00000127616	SMARCA4	protein_coding	NA	NA	NA	NA	1750	0.766876	NA	NA	1950	0.984684
chr19	11750591	11790591	+	ENST00000344893	ENSG00000197332	ZNF833P	pseudogene	NA	NA	NA	NA	NA	NA	1700	0.813653	1700	0.673146
chr19	12035890	12075890	+	ENST00000538752	ENSG00000197054	ZNF763	protein_coding	NA	NA	NA	NA	1525	0.968424	950	1.72723	NA	NA
chr19	19496639	19536639	+	ENST00000417582	ENSG00000167491	GATAD2A	protein_coding	NA	NA	NA	NA	NA	NA	650	1.14197	NA	NA
chr19	19516605	19556605	+	ENST00000457895	ENSG00000167491	GATAD2A	protein_coding	NA	NA	1375	0.702116	NA	NA	NA	NA	NA	NA
chr19	33515824	33555824	-	ENST00000254260	ENSG00000131941	RHPN2	protein_coding	NA	NA	NA	NA	NA	NA	NA	NA	1700	0.539629
chr19	34745456	34785456	+	ENST00000299505	ENSG00000166398	KIAA0355	protein_coding	NA	NA	1675	0.678783	1800	0.85697	1500	0.628083	NA	NA
chr19	40751443	40791443	-	ENST00000578123	ENSG00000105221	AKT2	protein_coding	NA	NA	NA	NA	NA	NA	1400	0.906439	NA	NA
chr19	45596218	45636218	+	ENST00000421905	ENSG00000104866	PPP1R37	protein_coding	NA	NA	900	0.578298	NA	NA	NA	NA	NA	NA
chr19	46048100	46088100	-	ENST00000323060	ENSG00000125741	OPA3	protein_coding	NA	NA	NA	NA	NA	NA	NA	NA	900	0.578571
chr19	48633601	48673601	-	ENST00000427526	ENSG00000105486	LIG1	protein_coding	NA	NA	NA	NA	NA	NA	925	0.592257	1550	0.693217
chr19	50706885	50746885	+	ENST00000440075	ENSG00000105357	MYH14	protein_coding	NA	NA	NA	NA	NA	NA	NA	NA	900	0.628313
chr2	224810	264810	-	ENST00000403658	ENSG00000035115	SH3YL1	protein_coding	NA	NA	NA	NA	425	0.570423	NA	NA	NA	NA
chr2	3284315	3324315	-	ENST00000478754	ENSG00000032389	TSSC1	protein_coding	NA	NA	2375	0.577999	NA	NA	NA	NA	NA	NA
chr2	9563697	9603697	+	ENST00000238112	ENSG00000119203	CPSF3	protein_coding	NA	NA	NA	NA	NA	NA	425	1.68902	1050	0.840696
chr2	10790101	10830101	-	ENST00000542668	ENSG00000115761	NOL10	protein_coding	NA	NA	1175	0.643021	NA	NA	375	0.794901	2000	1.14602
chr2	11674242	11714242	+	ENST00000381486	ENSG00000196208	GREB1	protein_coding	NA	NA	NA	NA	NA	NA	NA	NA	2525	16.3717
chr2	24150155	24190155	+	ENST00000446425	ENSG00000173960	UBXN2A	protein_coding	NA	NA	NA	NA	NA	NA	NA	NA	3000	0.541811
chr2	24163289	24203289	+	ENST00000309033	ENSG00000173960	UBXN2A	protein_coding	NA	NA	NA	NA	1600	0.76632	NA	NA	NA	NA
chr2	26165618	26205618	-	ENST00000405914	ENSG00000084731	KIF3C	protein_coding	NA	NA	NA	NA	NA	NA	NA	NA	1075	0.506687
chr2	28112808	28152808	+	ENST00000436924	ENSG00000158019	BRE	protein_coding	NA	NA	NA	NA	1575	0.68388	1475	0.587638	NA	NA
chr2	29117509	29157509	+	ENST00000407426	ENSG00000163811	WDR43	protein_coding	NA	NA	NA	NA	NA	NA	1100	2.04673	2000	4.16061
chr2	32196105	32236105	-	ENST00000490459	ENSG00000162959	MEMO1	protein_coding	NA	NA	1425	0.855875	1925	1.95816	1350	1.10544	2175	1.18376
chr2	32390933	32430933	+	ENST00000379343	ENSG00000152683	SLC30A6	protein_coding	NA	NA	NA	NA	1250	0.786969	1050	1.61611	1050	0.696162
chr2	32582096	32622096	+	ENST00000421745	ENSG00000115760	BIRC6	protein_coding	NA	NA	1725	1.41568	NA	NA	1725	1.58644	2025	2.04551
chr2	33359473	33399473	+	ENST00000432635	ENSG00000049323	LTBP1	protein_coding	NA	NA	NA	NA	1775	4.08268	NA	NA	NA	NA
chr2	36923833	36963833	+	ENST00000389975	ENSG00000205221	VIT	protein_coding	NA	NA	NA	NA	1825	0.938942	NA	NA	NA	NA
chr2	38564427	38604427	-	ENST00000406122	ENSG00000119787	ATL2	protein_coding	NA	NA	NA	NA	NA	NA	1675	1.83429	1975	1.57995
chr2	38893052	38933052	+	ENST00000272252	ENSG00000143891	GALM	protein_coding	NA	NA	NA	NA	NA	NA	975	2.13686	NA	NA
chr2	42795185	42835185	+	ENST00000406652	ENSG00000057935	MTA3	protein_coding	NA	NA	NA	NA	1550	0.735947	NA	NA	NA	NA
chr2	44395108	44435108	+	ENST00000419807	ENSG00000138032	PPM1B	protein_coding	NA	NA	1575	0.745138	NA	NA	1975	1.45041	NA	NA
chr2	45798420	45838420	-	ENST00000263736	ENSG00000068784	SRBD1	protein_coding	NA	NA	NA	NA	1825	0.614747	1250	1.2272	1800	0.705979
chr2	46656334	46696334	+	ENST00000432241	ENSG00000187600	TMEM247	protein_coding	NA	NA	NA	NA	NA	NA	1525	3.09284	NA	NA
chr2	47363650	47403650	-	ENST00000422269	ENSG00000143933	CALM2	protein_coding	NA	NA	NA	NA	NA	NA	1700	8.90513	NA	NA
chr2	47630108	47670108	+	ENST00000233146	ENSG00000095002	MSH2	protein_coding	NA	NA	NA	NA	NA	NA	600	1.96024	1650	1.01894
chr2	48092932	48132932	-	ENST00000403359	ENSG00000138081	FBXO11	protein_coding	NA	NA	NA	NA	NA	NA	1475	2.83351	NA	NA
chr2	48667737	48707737	+	ENST00000431614	ENSG00000162869	PPP1R21	protein_coding	NA	NA	1050	0.635652	1200	0.638956	950	0.896362	725	0.743722
chr2	54157977	54197977	-	ENST00000404125	ENSG00000068878	PSME4	protein_coding	NA	NA	1400	1.64251	NA	NA	1400	1.52739	NA	NA
chr2	54785531	54825531	+	ENST00000333896	ENSG00000115306	SPTBN1	protein_coding	NA	NA	NA	NA	1775	3.36046	1725	2.07486	1950	0.745467
chr2	56111274	56151274	-	ENST00000394555	ENSG00000115380	EFEMP1	protein_coding	NA	NA	NA	NA	1775	0.553424	NA	NA	1725	0.700962
chr2	61293015	61333015	+	ENST00000453186	ENSG00000162929	KIAA1841	protein_coding	NA	NA	NA	NA	1250	0.901516	NA	NA	NA	NA
chr2	61657904	61697904	-	ENST00000398571	ENSG00000115464	USP34	protein_coding	NA	NA	NA	NA	1650	2.19636	NA	NA	NA	NA
chr2	61725418	61765418	-	ENST00000401558	ENSG00000082898	XPO1	protein_coding	NA	NA	1700	2.31934	NA	NA	NA	NA	NA	NA
chr2	63775933	63815933	-	ENST00000272321	ENSG00000143951	WDPCP	protein_coding	NA	NA	NA	NA	1450	0.529526	NA	NA	NA	NA
chr2	64751465	64791465	+	ENST00000238855	ENSG00000119844	AFTPH	protein_coding	NA	NA	1200	0.555889	NA	NA	1550	0.936247	1975	1.25728
chr2	64937449	64977449	-	ENST00000476805	ENSG00000179833	SERTAD2	protein_coding	NA	NA	1275	0.627956	1625	0.732409	NA	NA	NA	NA
chr2	65663864	65703864	+	ENST00000377977	ENSG00000204929	AC074391.1	lincRNA	NA	NA	NA	NA	NA	NA	725	0.621646	NA	NA
chr2	66662265	66702265	+	ENST00000560281	ENSG00000143995	MEIS1	protein_coding	NA	NA	925	3.06105	NA	NA	NA	NA	NA	NA
chr2	69574382	69614382	-	ENST00000357308	ENSG00000198380	GFPT1	protein_coding	NA	NA	1325	2.23582	NA	NA	1475	6.19925	1500	1.19969
chr2	69624760	69664760	-	ENST00000410022	ENSG00000169599	NFU1	protein_coding	NA	NA	NA	NA	NA	NA	1125	0.522983	NA	NA
chr2	70435747	70475747	-	ENST00000470096	ENSG00000115998	C2orf42	protein_coding	NA	NA	575	0.77595	NA	NA	925	1.79259	1325	1.8484
chr2	71181879	71221879	-	ENST00000453130	ENSG00000258881	AC007040.11	processed_transcript	NA	NA	925	0.743832	NA	NA	NA	NA	925	0.673146
chr2	73207968	73247968	-	ENST00000463277	ENSG00000144040	SFXN5	protein_coding	NA	NA	NA	NA	1125	1.04621	NA	NA	NA	NA
chr2	74056089	74096089	+	ENST00000409707	ENSG00000124356	STAMBP	protein_coding	NA	NA	NA	NA	NA	NA	500	1.40507	1675	0.984357
chr2	75898115	75938115	-	ENST00000321027	ENSG00000005436	GCFC2	protein_coding	NA	NA	NA	NA	1500	0.770592	1025	1.04513	1175	0.528503
chr2	86076137	86116137	-	ENST00000377332	ENSG00000115525	ST3GAL5	protein_coding	NA	NA	1525	0.907871	1625	0.537937	NA	NA	NA	NA
chr2	87754887	87794887	+	ENST00000409054	ENSG00000222041	LINC00152	lincRNA	NA	NA	1700	0.654579	NA	NA	NA	NA	NA	NA
chr2	88991162	89031162	+	ENST00000283646	ENSG00000153574	RPIA	protein_coding	NA	NA	NA	NA	NA	NA	NA	NA	1675	0.695399
chr2	99307589	99347589	-	ENST00000393487	ENSG00000071073	MGAT4A	protein_coding	NA	NA	NA	NA	NA	NA	NA	NA	1450	0.994392
chr2	100899195	100939195	-	ENST00000393437	ENSG00000170500	LONRF2	protein_coding	NA	NA	NA	NA	NA	NA	NA	NA	2025	2.81301
chr2	113033171	113073171	+	ENST00000409871	ENSG00000188177	ZC3H6	protein_coding	NA	NA	NA	NA	NA	NA	325	0.562028	NA	NA
chr2	119981384	120021384	+	ENST00000393108	ENSG00000115107	STEAP3	protein_coding	NA	NA	NA	NA	1575	0.513728	NA	NA	NA	NA
chr2	120517207	120557207	+	ENST00000263708	ENSG00000088179	PTPN4	protein_coding	NA	NA	NA	NA	NA	NA	1650	0.919173	1975	1.00268
chr2	120770581	120810581	+	ENST00000263713	ENSG00000115109	EPB41L5	protein_coding	NA	NA	NA	NA	NA	NA	NA	NA	2200	1.17907
chr2	121010334	121050334	+	ENST00000272519	ENSG00000144118	RALB	protein_coding	NA	NA	925	0.634945	NA	NA	NA	NA	NA	NA
chr2	122407676	122447676	+	ENST00000419902	ENSG00000236859	AC018737.1	lincRNA	NA	NA	NA	NA	NA	NA	525	1.34601	NA	NA
chr2	126468546	126508546	+	ENST00000430692	ENSG00000235491	AC097499.1	lincRNA	NA	NA	NA	NA	NA	NA	NA	NA	1325	0.647511
chr2	132975542	133015542	-	ENST00000470729	ENSG00000163046	ANKRD30BL	protein_coding	NA	NA	375	0.694311	NA	NA	NA	NA	NA	NA
chr2	136248806	136288806	-	ENST00000536680	ENSG00000121988	ZRANB3	protein_coding	NA	NA	NA	NA	NA	NA	1000	0.899301	NA	NA
chr2	139219268	139259268	-	ENST00000431985	ENSG00000228043	AC097721.2	lincRNA	NA	NA	NA	NA	NA	NA	1525	0.92785	1175	0.769465
chr2	143635067	143675067	+	ENST00000264170	ENSG00000115919	KYNU	protein_coding	NA	NA	NA	NA	NA	NA	NA	NA	2100	23.1347
chr2	149894621	149934621	+	ENST00000473800	ENSG00000150556	LYPD6B	protein_coding	NA	NA	NA	NA	NA	NA	NA	NA	1900	0.613041
chr2	153534495	153574495	-	ENST00000410080	ENSG00000196504	PRPF40A	protein_coding	NA	NA	NA	NA	NA	NA	1525	2.44908	2100	2.37548
chr2	155554811	155594811	+	ENST00000295101	ENSG00000162989	KCNJ3	protein_coding	NA	NA	NA	NA	NA	NA	NA	NA	1750	0.554246
chr2	160103310	160143310	-	ENST00000359774	ENSG00000196151	WDSUB1	protein_coding	NA	NA	NA	NA	1650	0.906322	1150	0.856477	1550	0.967995
chr2	160569000	160609000	+	ENST00000409175	ENSG00000136536	2013-03-07	protein_coding	NA	NA	1475	3.13755	1850	7.11144	1675	4.1938	1850	3.87525
chr2	161016815	161056815	-	ENST00000409583	ENSG00000115221	ITGB6	protein_coding	NA	NA	NA	NA	NA	NA	NA	NA	1325	1.34029
chr2	166611192	166651192	-	ENST00000392701	ENSG00000115339	GALNT3	protein_coding	NA	NA	NA	NA	NA	NA	NA	NA	1925	0.620895
chr2	169705803	169745803	-	ENST00000479309	ENSG00000152253	SPC25	protein_coding	NA	NA	25	0.569052	1850	2.68452	1325	4.59083	1850	1.11351
chr2	170390383	170430383	-	ENST00000453153	ENSG00000138399	FASTKD1	protein_coding	NA	NA	NA	NA	NA	NA	825	2.28926	NA	NA
chr2	170550998	170590998	+	ENST00000498202	ENSG00000213160	KLHL23	protein_coding	NA	NA	NA	NA	NA	NA	1475	2.10453	1650	0.967995
chr2	172543919	172583919	+	ENST00000340296	ENSG00000077380	DYNC1I2	protein_coding	NA	NA	1050	1.82086	NA	NA	1100	1.65991	2050	1.38403
chr2	172710762	172750762	-	ENST00000422440	ENSG00000115840	SLC25A12	protein_coding	NA	NA	NA	NA	NA	NA	750	0.693858	NA	NA
chr2	175220443	175260443	-	ENST00000342016	ENSG00000138433	CIR1	protein_coding	NA	NA	925	0.814485	NA	NA	1200	1.28122	1875	0.952506
chr2	175830097	175870097	-	ENST00000409156	ENSG00000128656	CHN1	protein_coding	NA	NA	NA	NA	NA	NA	NA	NA	1700	0.62875
chr2	180570769	180610769	-	ENST00000409343	ENSG00000144331	ZNF385B	protein_coding	NA	NA	NA	NA	NA	NA	NA	NA	1675	1.47425
chr2	187558698	187598698	+	ENST00000304698	ENSG00000144369	FAM171B	protein_coding	NA	NA	NA	NA	NA	NA	NA	NA	1800	0.528503
chr2	187867947	187907947	+	ENST00000453517	ENSG00000224063	AC007319.1	processed_transcript	NA	NA	NA	NA	NA	NA	575	2.05918	NA	NA
chr2	189112418	189152418	-	ENST00000434418	ENSG00000231689	AC068718.1	lincRNA	NA	NA	NA	NA	NA	NA	1125	1.95562	NA	NA
chr2	190649107	190689107	+	ENST00000441310	ENSG00000064933	PMS1	protein_coding	NA	NA	NA	NA	1625	1.17262	1175	1.03183	1475	0.596679
chr2	193020435	193060435	-	ENST00000272771	ENSG00000144339	TMEFF2	protein_coding	NA	NA	NA	NA	2225	0.567308	NA	NA	NA	NA
chr2	196521471	196561471	+	ENST00000409086	ENSG00000196950	SLC39A10	protein_coding	NA	NA	1150	0.732139	NA	NA	1525	1.82715	1250	1.00137
chr2	198669426	198709426	+	ENST00000435320	ENSG00000115896	PLCL1	protein_coding	NA	NA	NA	NA	NA	NA	1925	3.00159	NA	NA
chr2	201473943	201513943	+	ENST00000465297	ENSG00000138356	AOX1	protein_coding	NA	NA	NA	NA	950	1.26523	NA	NA	NA	NA
chr2	202047855	202087855	+	ENST00000272879	ENSG00000003400	CASP10	protein_coding	NA	NA	NA	NA	NA	NA	1175	1.12895	NA	NA
chr2	204192942	204232942	+	ENST00000295851	ENSG00000138443	ABI2	protein_coding	NA	NA	NA	NA	NA	NA	NA	NA	1625	1.10707
chr2	204246898	204286898	+	ENST00000261018	ENSG00000138443	ABI2	protein_coding	NA	NA	NA	NA	825	2.13855	NA	NA	NA	NA
chr2	208394461	208434461	+	ENST00000430624	ENSG00000118260	CREB1	protein_coding	NA	NA	NA	NA	NA	NA	650	1.08487	1375	1.83804
chr2	208450652	208490652	-	ENST00000461419	ENSG00000144401	METTL21A	protein_coding	NA	NA	NA	NA	1625	4.31578	1650	3.66859	1625	5.84866
chr2	215963151	216003151	-	ENST00000272895	ENSG00000144452	ABCA12	protein_coding	NA	NA	NA	NA	NA	NA	NA	NA	1300	0.873421
chr2	216838346	216878346	-	ENST00000263268	ENSG00000118242	MREG	protein_coding	NA	NA	NA	NA	NA	NA	NA	NA	1925	4.91535
chr2	217277137	217317137	+	ENST00000357276	ENSG00000138375	SMARCAL1	protein_coding	NA	NA	425	0.560757	875	0.70048	NA	NA	NA	NA
chr2	217363578	217403578	+	ENST00000446558	ENSG00000197756	RPL37A	protein_coding	NA	NA	NA	NA	NA	NA	975	8.41309	NA	NA
chr2	219393084	219433084	-	ENST00000258399	ENSG00000135913	USP37	protein_coding	NA	NA	NA	NA	NA	NA	1100	1.06388	NA	NA
chr2	219575568	219615568	+	ENST00000457313	ENSG00000135912	TTLL4	protein_coding	NA	NA	NA	NA	1475	0.590093	NA	NA	NA	NA
chr2	224662744	224702744	-	ENST00000444408	ENSG00000152056	AP1S3	protein_coding	NA	NA	NA	NA	NA	NA	NA	NA	1925	0.686672
chr2	225410110	225450110	-	ENST00000344951	ENSG00000036257	CUL3	protein_coding	NA	NA	NA	NA	NA	NA	1525	1.16212	2025	1.60602
chr2	227624475	227664475	-	ENST00000305123	ENSG00000169047	IRS1	protein_coding	NA	NA	NA	NA	1650	1.97129	NA	NA	1350	5.87866
chr2	227700652	227740652	+	ENST00000341329	ENSG00000144468	RHBDD1	protein_coding	NA	NA	NA	NA	NA	NA	525	1.4269	NA	NA
chr2	228336868	228376868	+	ENST00000409979	ENSG00000173744	AGFG1	protein_coding	NA	NA	NA	NA	NA	NA	1675	1.22734	NA	NA
chr2	230096001	230136001	-	ENST00000392055	ENSG00000153823	PID1	protein_coding	NA	NA	1250	1.05706	NA	NA	NA	NA	NA	NA
chr2	231921578	231961578	+	ENST00000308696	ENSG00000173692	PSMD1	protein_coding	NA	NA	1250	2.25543	NA	NA	1400	1.61331	1675	2.19921
chr2	233497938	233537938	+	ENST00000264059	ENSG00000115468	EFHD1	protein_coding	NA	NA	NA	NA	NA	NA	NA	NA	1600	1.68783
chr2	234160217	234200217	+	ENST00000347464	ENSG00000085978	ATG16L1	protein_coding	NA	NA	NA	NA	NA	NA	1100	0.742	1550	1.34684
chr2	238877435	238917435	+	ENST00000434655	ENSG00000184182	UBE2F	protein_coding	NA	NA	NA	NA	NA	NA	NA	NA	1475	0.50865
chr2	240924819	240964819	-	ENST00000252711	ENSG00000130414	NDUFA10	protein_coding	NA	NA	1425	0.852367	NA	NA	1400	1.75298	1925	1.12137
chr2	241938255	241978255	+	ENST00000405547	ENSG00000162804	SNED1	protein_coding	NA	NA	NA	NA	1075	0.623647	NA	NA	NA	NA
chr20	2449553	2489553	-	ENST00000461548	ENSG00000256566	RP4-734P14.4	protein_coding	NA	NA	NA	NA	1975	0.63593	NA	NA	NA	NA
chr20	2854066	2894066	+	ENST00000455631	ENSG00000132670	PTPRA	protein_coding	NA	NA	NA	NA	NA	NA	NA	NA	2200	0.712088
chr20	5551672	5591672	-	ENST00000379019	ENSG00000125772	GPCPD1	protein_coding	NA	NA	1575	0.728304	NA	NA	2225	1.869	NA	NA
chr20	13579587	13619587	-	ENST00000337743	ENSG00000089123	TASP1	protein_coding	NA	NA	NA	NA	NA	NA	NA	NA	1675	0.704671
chr20	16514078	16554078	-	ENST00000378003	ENSG00000089177	KIF16B	protein_coding	NA	NA	NA	NA	NA	NA	NA	NA	1800	0.756485
chr20	20653266	20693266	-	ENST00000202677	ENSG00000188559	RALGAPA2	protein_coding	NA	NA	NA	NA	NA	NA	NA	NA	2200	0.773174
chr20	30102231	30142231	+	ENST00000340852	ENSG00000101294	HM13	protein_coding	NA	NA	1175	1.31783	NA	NA	NA	NA	1400	1.40029
chr20	31350191	31390191	+	ENST00000328111	ENSG00000088305	DNMT3B	protein_coding	NA	NA	NA	NA	NA	NA	1200	1.03659	1575	0.567445
chr20	32581452	32621452	+	ENST00000375114	ENSG00000125970	RALY	protein_coding	NA	NA	1350	0.88666	NA	NA	1375	1.17766	NA	NA
chr20	35974557	36014557	+	ENST00000373578	ENSG00000197122	SRC	protein_coding	NA	NA	925	0.552925	1250	0.52265	NA	NA	NA	NA
chr20	37101459	37141459	+	ENST00000397042	ENSG00000170471	RALGAPB	protein_coding	NA	NA	NA	NA	NA	NA	1175	0.760893	2300	1.44632
chr20	39906312	39946312	-	ENST00000559296	ENSG00000174306	ZHX3	protein_coding	NA	NA	1675	2.04948	NA	NA	NA	NA	NA	NA
chr20	40087957	40127957	-	ENST00000440697	ENSG00000124177	CHD6	protein_coding	NA	NA	200	0.95432	NA	NA	NA	NA	NA	NA
chr20	43160426	43200426	+	ENST00000372891	ENSG00000168734	PKIG	protein_coding	NA	NA	NA	NA	1375	0.50703	NA	NA	NA	NA
chr20	43398979	43438979	-	ENST00000372851	ENSG00000101098	RIMS4	protein_coding	NA	NA	NA	NA	NA	NA	NA	NA	1625	0.639766
chr20	44995271	45035271	-	ENST00000396391	ENSG00000062598	ELMO2	protein_coding	NA	NA	NA	NA	NA	NA	NA	NA	1100	0.650893
chr20	45945567	45985567	-	ENST00000262975	ENSG00000101040	ZMYND8	protein_coding	NA	NA	NA	NA	NA	NA	1000	6.30995	NA	NA
chr20	47404420	47444420	-	ENST00000396220	ENSG00000124126	PREX1	protein_coding	NA	NA	NA	NA	NA	NA	NA	NA	1850	2.08172
chr20	47662849	47702849	+	ENST00000262982	ENSG00000124207	CSE1L	protein_coding	NA	NA	NA	NA	1425	1.63048	1325	2.37015	1750	4.23272
chr20	47764904	47804904	-	ENST00000347458	ENSG00000124214	STAU1	protein_coding	NA	NA	NA	NA	2250	1.60395	925	1.08011	2275	2.10289
chr20	48144683	48184683	-	ENST00000478764	ENSG00000124212	PTGIS	protein_coding	NA	NA	NA	NA	2000	2.51306	NA	NA	NA	NA
chr20	49268065	49308065	-	ENST00000327979	ENSG00000042062	FAM65C	protein_coding	NA	NA	NA	NA	NA	NA	575	0.856477	NA	NA
chr20	49411431	49451431	+	ENST00000358791	ENSG00000124243	BCAS4	protein_coding	NA	NA	NA	NA	NA	NA	NA	NA	1925	13.7967
chr20	49507958	49547958	-	ENST00000396032	ENSG00000101126	ADNP	protein_coding	NA	NA	NA	NA	NA	NA	NA	NA	1800	10.3303
chr20	50119258	50159258	-	ENST00000396009	ENSG00000101096	NFATC2	protein_coding	NA	NA	NA	NA	NA	NA	1525	0.871871	1400	0.633549
chr20	56246592	56286592	-	ENST00000472841	ENSG00000124225	PMEPA1	protein_coding	NA	NA	1425	0.817857	NA	NA	NA	NA	1800	5.17933
chr20	57226490	57266490	+	ENST00000530122	ENSG00000254995	STX16-NPEPL1	protein_coding	NA	NA	NA	NA	NA	NA	1325	1.75088	NA	NA
chr21	11058925	11098925	-	ENST00000470054	ENSG00000187172	BAGE2	pseudogene	NA	NA	NA	NA	NA	NA	1725	1.75634	NA	NA
chr21	15399742	15439742	+	ENST00000428809	ENSG00000224905	AP001347.6	processed_transcript	NA	NA	NA	NA	NA	NA	2450	0.620946	NA	NA
chr21	15878664	15918664	-	ENST00000400566	ENSG00000155307	SAMSN1	protein_coding	NA	NA	NA	NA	NA	NA	1500	7.31827	NA	NA
chr21	22370633	22410633	+	ENST00000400546	ENSG00000154654	NCAM2	protein_coding	NA	NA	NA	NA	2050	0.81278	NA	NA	1525	0.940178
chr21	22519438	22559438	+	ENST00000535285	ENSG00000154654	NCAM2	protein_coding	NA	NA	NA	NA	NA	NA	2250	2.76046	NA	NA
chr21	23582258	23622258	+	ENST00000444130	ENSG00000226043	AP000705.7	lincRNA	NA	NA	NA	NA	NA	NA	2025	3.89991	NA	NA
chr21	33245628	33285628	+	ENST00000270112	ENSG00000142149	HUNK	protein_coding	NA	NA	1350	0.703312	NA	NA	NA	NA	NA	NA
chr21	34974644	35014644	-	ENST00000420072	ENSG00000205758	CRYZL1	protein_coding	NA	NA	NA	NA	NA	NA	975	0.596175	NA	NA
chr21	35947441	35987441	-	ENST00000313806	ENSG00000159200	RCAN1	protein_coding	NA	NA	NA	NA	NA	NA	900	0.55671	NA	NA
chr21	36222087	36262087	-	ENST00000399237	ENSG00000159216	RUNX1	protein_coding	NA	NA	NA	NA	NA	NA	1450	3.80867	NA	NA
chr21	39453454	39493454	-	ENST00000328264	ENSG00000184029	DSCR4	protein_coding	NA	NA	NA	NA	NA	NA	1025	2.84961	NA	NA
chr21	40817781	40857781	+	ENST00000380637	ENSG00000185437	SH3BGR	protein_coding	NA	NA	NA	NA	NA	NA	1125	0.855358	NA	NA
chr21	43934024	43974024	+	ENST00000352133	ENSG00000160190	SLC37A1	protein_coding	NA	NA	NA	NA	NA	NA	NA	NA	875	0.629622
chr21	45138978	45178978	+	ENST00000468090	ENSG00000160209	PDXK	protein_coding	NA	NA	NA	NA	NA	NA	NA	NA	1550	0.712088
chr21	46493768	46533768	+	ENST00000462214	ENSG00000197381	ADARB1	protein_coding	NA	NA	1675	0.772061	NA	NA	NA	NA	1675	0.634203
chr22	17082777	17122777	+	ENST00000558085	ENSG00000100181	TPTEP1	lincRNA	NA	NA	NA	NA	NA	NA	1600	1.7068	NA	NA
chr22	18111621	18151621	+	ENST00000399781	ENSG00000099968	BCL2L13	protein_coding	NA	NA	NA	NA	NA	NA	1750	1.14785	NA	NA
chr22	18171840	18211840	+	ENST00000399777	ENSG00000099968	BCL2L13	protein_coding	NA	NA	50	0.646775	NA	NA	NA	NA	NA	NA
chr22	18467325	18507325	-	ENST00000441493	ENSG00000243156	MICAL3	protein_coding	NA	NA	1150	0.506259	NA	NA	NA	NA	NA	NA
chr22	19379256	19419256	-	ENST00000263208	ENSG00000100084	HIRA	protein_coding	NA	NA	NA	NA	1675	1.22042	NA	NA	1300	0.89131
chr22	20008592	20048592	+	ENST00000411907	ENSG00000183597	C22orf25	protein_coding	NA	NA	NA	NA	NA	NA	200	0.538517	NA	NA
chr22	20971201	21011201	-	ENST00000443839	ENSG00000223553	SMPD4P1	pseudogene	NA	NA	NA	NA	NA	NA	400	1.45335	NA	NA
chr22	24951977	24991977	+	ENST00000404603	ENSG00000100028	SNRPD3	protein_coding	NA	NA	1950	0.927643	NA	NA	1950	2.29374	NA	NA
chr22	26138111	26178111	+	ENST00000536101	ENSG00000133454	MYO18B	protein_coding	NA	NA	NA	NA	NA	NA	1000	1.17304	NA	NA
chr22	26946127	26986127	-	ENST00000338754	ENSG00000128294	TPST2	protein_coding	NA	NA	1025	0.699994	875	0.683791	NA	NA	NA	NA
chr22	28157486	28197486	-	ENST00000302326	ENSG00000169184	MN1	protein_coding	NA	NA	825	1.02263	NA	NA	NA	NA	NA	NA
chr22	28315364	28355364	+	ENST00000430853	ENSG00000235954	TTC28-AS1	lincRNA	NA	NA	NA	NA	NA	NA	650	0.728005	NA	NA
chr22	29098410	29138410	-	ENST00000544772	ENSG00000183765	CHEK2	protein_coding	NA	NA	NA	NA	NA	NA	NA	NA	1800	1.51875
chr22	29279580	29319580	+	ENST00000544604	ENSG00000183579	ZNRF3	protein_coding	NA	NA	NA	NA	NA	NA	NA	NA	2175	0.656456
chr22	31608225	31648225	+	ENST00000462625	ENSG00000182541	LIMK2	protein_coding	NA	NA	NA	NA	1450	0.71739	NA	NA	NA	NA
chr22	35587049	35627049	-	ENST00000423311	ENSG00000233080	CTA-714B7.5	processed_transcript	NA	NA	NA	NA	NA	NA	0	0.535298	NA	NA
chr22	38244875	38284875	+	ENST00000412331	ENSG00000100129	EIF3L	protein_coding	NA	NA	1475	0.802927	NA	NA	1050	1.84968	1450	1.62805
chr22	40440821	40480821	+	ENST00000301923	ENSG00000100354	TNRC6B	protein_coding	NA	NA	NA	NA	NA	NA	1250	0.949263	NA	NA
chr22	41642255	41682255	-	ENST00000356244	ENSG00000100401	RANGAP1	protein_coding	NA	NA	NA	NA	NA	NA	575	0.628223	NA	NA
chr22	42229109	42269109	+	ENST00000361204	ENSG00000198911	SREBF2	protein_coding	NA	NA	NA	NA	1425	1.38612	NA	NA	NA	NA
chr22	43213408	43253408	-	ENST00000263245	ENSG00000242247	ARFGAP3	protein_coding	NA	NA	1350	0.818156	NA	NA	NA	NA	NA	NA
chr22	44319672	44359672	+	ENST00000406117	ENSG00000100344	PNPLA3	protein_coding	NA	NA	450	0.671385	NA	NA	NA	NA	NA	NA
chr22	44351301	44391301	+	ENST00000350028	ENSG00000100347	SAMM50	protein_coding	NA	NA	NA	NA	1250	0.597436	NA	NA	NA	NA
chr22	45148438	45188438	+	ENST00000389774	ENSG00000241484	ARHGAP8	protein_coding	NA	NA	NA	NA	NA	NA	NA	NA	2200	0.595261
chr22	46449749	46489749	+	ENST00000381051	ENSG00000197182	hsa-mir-4763	protein_coding	NA	NA	NA	NA	NA	NA	NA	NA	3500	0.529485
chr22	48027423	48067423	+	ENST00000423737	ENSG00000224271	RP11-191L9.4	lincRNA	NA	NA	NA	NA	NA	NA	1400	0.885026	1500	0.873421
chr22	48972118	49012118	+	ENST00000358295	ENSG00000219438	FAM19A5	protein_coding	NA	NA	1100	0.637773	NA	NA	NA	NA	NA	NA
chr22	50011152	50051152	-	ENST00000414287	ENSG00000188511	C22orf34	protein_coding	NA	NA	NA	NA	NA	NA	800	0.642358	NA	NA
chr3	4535032	4575032	+	ENST00000423119	ENSG00000150995	ITPR1	protein_coding	NA	NA	NA	NA	NA	NA	900	1.02064	NA	NA
chr3	10068098	10108098	+	ENST00000287647	ENSG00000144554	FANCD2	protein_coding	NA	NA	NA	NA	NA	NA	1125	2.22362	1675	1.00072
chr3	11196214	11236214	+	ENST00000431010	ENSG00000196639	HRH1	protein_coding	NA	NA	NA	NA	1200	1.26679	NA	NA	NA	NA
chr3	11313995	11353995	+	ENST00000451513	ENSG00000197548	ATG7	protein_coding	NA	NA	NA	NA	1725	1.35835	1125	0.84934	1250	1.00137
chr3	11848393	11888393	-	ENST00000273037	ENSG00000144559	TAMM41	protein_coding	NA	NA	NA	NA	800	0.750121	NA	NA	1075	1.99719
chr3	12525931	12565931	+	ENST00000314571	ENSG00000154743	TSEN2	protein_coding	NA	NA	NA	NA	NA	NA	425	0.827928	900	1.20721
chr3	13421809	13461809	-	ENST00000254508	ENSG00000132182	NUP210	protein_coding	NA	NA	NA	NA	NA	NA	675	0.977812	1800	1.41305
chr3	13590631	13630631	+	ENST00000404922	ENSG00000163520	FBLN2	protein_coding	NA	NA	NA	NA	1125	0.712739	NA	NA	NA	NA
chr3	15247750	15287750	+	ENST00000253693	ENSG00000131375	CAPN7	protein_coding	NA	NA	925	1.01904	NA	NA	925	1.27982	1800	2.72836
chr3	15334696	15374696	-	ENST00000426925	ENSG00000131370	SH3BP5	protein_coding	NA	NA	850	0.571336	NA	NA	NA	NA	NA	NA
chr3	15429025	15469025	-	ENST00000443029	ENSG00000206562	METTL6	protein_coding	NA	NA	NA	NA	NA	NA	2200	0.958499	NA	NA
chr3	15603338	15643338	-	ENST00000321169	ENSG00000131373	HACL1	protein_coding	NA	NA	NA	NA	1675	0.574362	600	0.733464	750	1.1062
chr3	15799691	15839691	-	ENST00000497037	ENSG00000206560	ANKRD28	protein_coding	NA	NA	1475	1.89257	NA	NA	NA	NA	NA	NA
chr3	16306706	16346706	+	ENST00000285083	ENSG00000154814	OXNAD1	protein_coding	NA	NA	NA	NA	NA	NA	1300	1.51339	1050	0.617078
chr3	17744240	17784240	-	ENST00000485432	ENSG00000131374	TBC1D5	protein_coding	NA	NA	NA	NA	1250	1.05429	NA	NA	2075	0.923489
chr3	20081515	20121515	+	ENST00000263754	ENSG00000114166	KAT2B	protein_coding	NA	NA	NA	NA	NA	NA	1100	0.829607	NA	NA
chr3	21752927	21792927	-	ENST00000281523	ENSG00000151789	ZNF385D	protein_coding	NA	NA	NA	NA	1750	0.671842	NA	NA	NA	NA
chr3	24496773	24536773	-	ENST00000447414	ENSG00000151090	THRB	protein_coding	NA	NA	NA	NA	NA	NA	1575	1.15512	NA	NA
chr3	28283075	28323075	+	ENST00000477739	ENSG00000187118	CMC1	protein_coding	NA	NA	NA	NA	NA	NA	1250	1.81288	1550	1.19609
chr3	31982797	32022797	-	ENST00000452791	ENSG00000144645	OSBPL10	protein_coding	NA	NA	NA	NA	NA	NA	NA	NA	1450	0.561882
chr3	32148003	32188003	+	ENST00000282541	ENSG00000152642	GPD1L	protein_coding	NA	NA	NA	NA	NA	NA	NA	NA	1700	0.95905
chr3	32726637	32766637	+	ENST00000328834	ENSG00000182973	CNOT10	protein_coding	NA	NA	NA	NA	1575	0.591161	850	1.45923	1575	0.888692
chr3	33660933	33700933	-	ENST00000480013	ENSG00000163539	CLASP2	protein_coding	NA	NA	NA	NA	1550	0.791597	NA	NA	NA	NA
chr3	33839844	33879844	+	ENST00000307296	ENSG00000170248	PDCD6IP	protein_coding	NA	NA	1200	1.43018	NA	NA	1225	2.20823	1575	1.94297
chr3	36946548	36986548	-	ENST00000429976	ENSG00000168016	TRANK1	protein_coding	NA	NA	NA	NA	950	0.631346	NA	NA	NA	NA
chr3	37034823	37074823	+	ENST00000231790	ENSG00000076242	MLH1	protein_coding	NA	NA	NA	NA	NA	NA	450	2.2281	NA	NA
chr3	38388270	38428270	+	ENST00000207870	ENSG00000093217	XYLB	protein_coding	NA	NA	NA	NA	1075	0.663988	575	0.69022	1075	0.642384
chr3	43693086	43733086	-	ENST00000413397	ENSG00000160746	ANO10	protein_coding	NA	NA	NA	NA	NA	NA	675	1.21922	NA	NA
chr3	44379611	44419611	+	ENST00000417237	ENSG00000179152	C3orf23	protein_coding	NA	NA	NA	NA	NA	NA	575	0.661951	NA	NA
chr3	44977677	45017677	-	ENST00000455235	ENSG00000163812	ZDHHC3	protein_coding	NA	NA	NA	NA	NA	NA	1075	0.690919	1725	0.511813
chr3	45017768	45057768	+	ENST00000481405	ENSG00000075914	EXOSC7	protein_coding	NA	NA	1300	0.555808	NA	NA	900	0.959759	NA	NA
chr3	45997307	46037307	-	ENST00000296137	ENSG00000163820	FYCO1	protein_coding	NA	NA	NA	NA	NA	NA	925	0.506749	1625	0.567445
chr3	46568040	46608040	-	ENST00000395905	ENSG00000163827	LRRC2	protein_coding	NA	NA	850	0.951384	NA	NA	NA	NA	NA	NA
chr3	47205987	47245987	+	ENST00000429315	ENSG00000227398	RP11-447D11.2	lincRNA	NA	NA	NA	NA	1275	0.641158	1000	1.07773	NA	NA
chr3	48845279	48885279	-	ENST00000265563	ENSG00000114302	PRKAR2A	protein_coding	NA	NA	NA	NA	1700	0.561234	NA	NA	NA	NA
chr3	48956254	48996254	+	ENST00000430423	ENSG00000177479	ARIH2	protein_coding	NA	NA	NA	NA	NA	NA	1775	1.63836	1775	1.05144
chr3	49337504	49377504	-	ENST00000265560	ENSG00000114316	USP4	protein_coding	NA	NA	850	0.662928	1675	1.04824	150	0.685182	2100	0.652093
chr3	52679852	52719852	-	ENST00000394830	ENSG00000163939	PBRM1	protein_coding	NA	NA	NA	NA	1775	2.2025	NA	NA	NA	NA
chr3	53040766	53080766	-	ENST00000474837	ENSG00000163935	SFMBT1	protein_coding	NA	NA	NA	NA	1875	0.535712	NA	NA	1975	0.895674
chr3	63897605	63937605	+	ENST00000487717	ENSG00000163635	ATXN7	protein_coding	NA	NA	NA	NA	1025	2.25699	NA	NA	NA	NA
chr3	66271168	66311168	+	ENST00000336733	ENSG00000144741	SLC25A26	protein_coding	NA	NA	NA	NA	NA	NA	NA	NA	1525	0.956868
chr3	69788586	69828586	+	ENST00000352241	ENSG00000187098	MITF	protein_coding	NA	NA	NA	NA	NA	NA	1675	0.861935	NA	NA
chr3	88159035	88199035	-	ENST00000462901	ENSG00000163320	CGGBP1	protein_coding	NA	NA	NA	NA	NA	NA	1050	0.656912	1900	0.636495
chr3	93652910	93692910	-	ENST00000394236	ENSG00000184500	PROS1	protein_coding	NA	NA	NA	NA	NA	NA	850	0.905319	NA	NA
chr3	94657016	94697016	+	ENST00000462219	ENSG00000239589	RP11-118N24.3	lincRNA	NA	NA	NA	NA	NA	NA	300	0.699456	NA	NA
chr3	99536678	99576678	+	ENST00000421999	ENSG00000184220	C3orf26	protein_coding	NA	NA	NA	NA	NA	NA	1025	0.892164	1375	0.69998
chr3	100672359	100712359	-	ENST00000471714	ENSG00000154175	ABI3BP	protein_coding	NA	NA	NA	NA	1750	2.21265	NA	NA	NA	NA
chr3	108308529	108348529	+	ENST00000361582	ENSG00000198919	DZIP3	protein_coding	NA	NA	NA	NA	NA	NA	NA	NA	1600	1.09278
chr3	111805182	111845182	+	ENST00000480282	ENSG00000114529	C3orf52	protein_coding	NA	NA	750	0.565516	NA	NA	NA	NA	1800	0.80099
chr3	113251143	113291143	+	ENST00000264852	ENSG00000072858	SIDT1	protein_coding	NA	NA	NA	NA	NA	NA	NA	NA	1700	1.79986
chr3	114826118	114866118	-	ENST00000357258	ENSG00000181722	ZBTB20	protein_coding	NA	NA	NA	NA	1350	0.638555	925	1.02525	NA	NA
chr3	120461579	120501579	+	ENST00000283875	ENSG00000153767	GTF2E1	protein_coding	NA	NA	NA	NA	1375	0.992522	900	0.563848	1475	0.884546
chr3	121224853	121264853	-	ENST00000264233	ENSG00000051341	POLQ	protein_coding	NA	NA	NA	NA	NA	NA	950	1.14813	NA	NA
chr3	122193792	122233792	-	ENST00000465882	ENSG00000114030	KPNA1	protein_coding	NA	NA	NA	NA	NA	NA	1425	0.737942	2025	4.82514
chr3	122785909	122825909	+	ENST00000489923	ENSG00000065485	PDIA5	protein_coding	NA	NA	1350	0.913528	2000	0.966132	NA	NA	1575	0.578572
chr3	122920774	122960774	+	ENST00000477063	ENSG00000121542	SEC22A	protein_coding	NA	NA	NA	NA	NA	NA	1050	1.10656	NA	NA
chr3	123264032	123304032	-	ENST00000383657	ENSG00000206527	PTPLB	protein_coding	NA	NA	NA	NA	NA	NA	NA	NA	1475	2.2352
chr3	123304389	123344389	+	ENST00000485162	ENSG00000239523	MYLK-AS1	lincRNA	NA	NA	NA	NA	NA	NA	NA	NA	1225	1.17416
chr3	124971637	125011637	-	ENST00000497929	ENSG00000163848	ZNF148	protein_coding	NA	NA	NA	NA	NA	NA	50	1.13637	NA	NA
chr3	125054198	125094198	-	ENST00000360647	ENSG00000163848	ZNF148	protein_coding	NA	NA	1675	2.16748	1725	2.79226	1450	1.02064	2425	2.14739
chr3	125199041	125239041	-	ENST00000251775	ENSG00000114520	SNX4	protein_coding	NA	NA	NA	NA	NA	NA	NA	NA	1600	1.68052
chr3	125273934	125313934	-	ENST00000296220	ENSG00000144909	OSBPL11	protein_coding	NA	NA	NA	NA	1275	0.830781	NA	NA	1650	0.601697
chr3	126333998	126373998	-	ENST00000524230	ENSG00000197763	TXNRD3	protein_coding	NA	NA	NA	NA	1450	0.701636	NA	NA	1425	0.661256
chr3	126423063	126463063	+	ENST00000290913	ENSG00000159685	CHCHD6	protein_coding	NA	NA	NA	NA	NA	NA	NA	NA	1075	0.516286
chr3	127348024	127388024	+	ENST00000342480	ENSG00000114631	PODXL2	protein_coding	NA	NA	NA	NA	NA	NA	NA	NA	1575	0.501341
chr3	129158968	129198968	+	ENST00000347300	ENSG00000163913	IFT122	protein_coding	NA	NA	NA	NA	NA	NA	275	0.66377	2000	1.1266
chr3	129572419	129612419	-	ENST00000426664	ENSG00000172765	TMCC1	protein_coding	NA	NA	1350	0.91535	NA	NA	NA	NA	NA	NA
chr3	130425673	130465673	-	ENST00000356763	ENSG00000196455	PIK3R4	protein_coding	NA	NA	1325	0.72156	NA	NA	1350	0.881808	NA	NA
chr3	130569439	130609439	+	ENST00000505330	ENSG00000017260	ATP2C1	protein_coding	NA	NA	NA	NA	NA	NA	1450	0.670907	NA	NA
chr3	132339567	132379567	-	ENST00000264990	ENSG00000240303	ACAD11	protein_coding	NA	NA	NA	NA	NA	NA	NA	NA	2450	0.65722
chr3	134204585	134244585	+	ENST00000332047	ENSG00000182923	CEP63	protein_coding	NA	NA	NA	NA	NA	NA	NA	NA	2225	0.579553
chr3	135969148	136009148	+	ENST00000251654	ENSG00000114054	PCCB	protein_coding	NA	NA	NA	NA	1275	0.601018	850	0.829888	1400	0.897964
chr3	139654027	139694027	+	ENST00000458420	ENSG00000158258	CLSTN2	protein_coding	NA	NA	NA	NA	NA	NA	NA	NA	1300	0.745467
chr3	141595456	141635456	+	ENST00000286371	ENSG00000069849	ATP1B3	protein_coding	NA	NA	1175	1.70827	1950	2.29636	1275	1.9699	2200	2.33599
chr3	141707999	141747999	-	ENST00000497579	ENSG00000114126	TFDP2	protein_coding	NA	NA	NA	NA	NA	NA	825	2.43187	NA	NA
chr3	141904449	141944449	-	ENST00000392993	ENSG00000175066	GK5	protein_coding	NA	NA	NA	NA	1375	0.79489	NA	NA	825	0.584135
chr3	142720010	142760010	+	ENST00000488497	ENSG00000163714	U2SURP	protein_coding	NA	NA	1750	1.07708	NA	NA	2400	4.87003	NA	NA
chr3	147111209	147151209	+	ENST00000472523	ENSG00000152977	ZIC1	protein_coding	NA	NA	1850	1.10174	NA	NA	NA	NA	2250	1.16871
chr3	148415571	148455571	+	ENST00000497524	ENSG00000144891	AGTR1	protein_coding	NA	NA	NA	NA	NA	NA	NA	NA	2200	0.673146
chr3	150280961	150320961	-	ENST00000479209	ENSG00000120742	SERP1	protein_coding	NA	NA	NA	NA	NA	NA	1325	1.35483	1800	0.617514
chr3	150804181	150844181	+	ENST00000422248	ENSG00000144893	MED12L	protein_coding	NA	NA	NA	NA	NA	NA	NA	NA	2275	0.874075
chr3	153838792	153878792	+	ENST00000356448	ENSG00000114790	ARHGEF26	protein_coding	NA	NA	NA	NA	NA	NA	NA	NA	1950	1.69688
chr3	155484140	155524140	-	ENST00000340171	ENSG00000174928	C3orf33	protein_coding	NA	NA	NA	NA	1550	0.575719	975	0.754876	975	0.545192
chr3	155588325	155628325	+	ENST00000496455	ENSG00000163655	GMPS	protein_coding	NA	NA	1500	0.687267	1975	2.81614	1800	2.70504	2200	2.62681
chr3	157920861	157960861	+	ENST00000482822	ENSG00000174891	RSRC1	protein_coding	NA	NA	NA	NA	NA	NA	NA	NA	2000	1.48341
chr3	160473390	160513390	+	ENST00000497343	ENSG00000163590	PPM1L	protein_coding	NA	NA	NA	NA	NA	NA	NA	NA	1050	0.617514
chr3	167412727	167452727	-	ENST00000473645	ENSG00000114209	PDCD10	protein_coding	NA	NA	NA	NA	1900	2.50453	1775	3.30346	1875	1.49693
chr3	169341406	169381406	-	ENST00000485957	ENSG00000085276	MECOM	protein_coding	NA	NA	NA	NA	NA	NA	NA	NA	3200	1.91014
chr3	169755717	169795717	+	ENST00000355897	ENSG00000173890	GPR160	protein_coding	NA	NA	NA	NA	NA	NA	NA	NA	1525	0.530903
chr3	171138197	171178197	-	ENST00000436636	ENSG00000154310	TNIK	protein_coding	NA	NA	NA	NA	NA	NA	1000	1.30557	NA	NA
chr3	171488284	171528284	-	ENST00000351298	ENSG00000075651	PLD1	protein_coding	NA	NA	NA	NA	NA	NA	1750	2.982	NA	NA
chr3	174156363	174196363	+	ENST00000491329	ENSG00000177694	NAALADL2	protein_coding	NA	NA	NA	NA	1650	1.44263	NA	NA	NA	NA
chr3	178538193	178578193	-	ENST00000425330	ENSG00000237978	RP11-385J1.2	lincRNA	NA	NA	NA	NA	NA	NA	725	0.642358	NA	NA
chr3	182971141	183011141	+	ENST00000480551	ENSG00000176597	B3GNT5	protein_coding	NA	NA	NA	NA	NA	NA	1300	1.55593	NA	NA
chr3	183106566	183146566	-	ENST00000482017	ENSG00000053524	MCF2L2	protein_coding	NA	NA	NA	NA	NA	NA	800	0.692319	NA	NA
chr3	183353356	183393356	+	ENST00000242810	ENSG00000114796	KLHL24	protein_coding	NA	NA	875	0.63867	NA	NA	1125	1.62815	1875	1.91963
chr3	183695803	183735803	-	ENST00000334444	ENSG00000114770	ABCC5	protein_coding	NA	NA	NA	NA	NA	NA	NA	NA	1675	3.63887
chr3	183853164	183893164	+	ENST00000444495	ENSG00000145191	EIF2B5	protein_coding	NA	NA	NA	NA	NA	NA	300	1.12518	NA	NA
chr3	185000741	185040741	+	ENST00000446828	ENSG00000073803	MAP3K13	protein_coding	NA	NA	NA	NA	1300	0.613122	NA	NA	1025	0.706525
chr3	185303962	185343962	+	ENST00000296257	ENSG00000163904	SENP2	protein_coding	NA	NA	NA	NA	NA	NA	1375	0.662651	NA	NA
chr3	186648274	186688274	+	ENST00000169298	ENSG00000073849	ST6GAL1	protein_coding	NA	NA	NA	NA	NA	NA	575	2.5462	NA	NA
chr3	193310933	193350933	+	ENST00000361150	ENSG00000198836	OPA1	protein_coding	NA	NA	NA	NA	NA	NA	1325	0.832686	1325	1.39189
chr3	194890595	194930595	-	ENST00000491138	ENSG00000173950	XXYLT1	protein_coding	NA	NA	NA	NA	2350	0.590649	NA	NA	NA	NA
chr3	195974828	196014828	-	ENST00000443555	ENSG00000161217	PCYT1A	protein_coding	NA	NA	1125	0.961663	NA	NA	NA	NA	NA	NA
chr3	196119345	196159345	-	ENST00000296328	ENSG00000163960	UBXN7	protein_coding	NA	NA	NA	NA	NA	NA	1600	0.984949	1975	1.09595
chr3	197242919	197282919	-	ENST00000392378	ENSG00000161267	BDH1	protein_coding	NA	NA	NA	NA	NA	NA	NA	NA	2275	0.566136
chr4	452945	492945	-	ENST00000511833	ENSG00000182903	ZNF721	protein_coding	NA	NA	NA	NA	NA	NA	450	0.763692	NA	NA
chr4	1341104	1381104	+	ENST00000389851	ENSG00000163945	UVSSA	protein_coding	NA	NA	NA	NA	NA	NA	825	0.522143	NA	NA
chr4	2470664	2510664	+	ENST00000314289	ENSG00000063978	RNF4	protein_coding	NA	NA	NA	NA	1825	1.92076	1875	1.20299	2225	1.09595
chr4	2845584	2885584	+	ENST00000398125	ENSG00000087274	ADD1	protein_coding	NA	NA	NA	NA	NA	NA	1600	1.25995	NA	NA
chr4	4543926	4583926	+	ENST00000512438	ENSG00000247708	RP11-323F5.2	lincRNA	NA	NA	NA	NA	NA	NA	700	0.699176	NA	NA
chr4	5053169	5093169	+	ENST00000282908	ENSG00000152953	STK32B	protein_coding	NA	NA	NA	NA	1750	1.09009	NA	NA	NA	NA
chr4	6911171	6951171	+	ENST00000448507	ENSG00000132405	TBC1D14	protein_coding	NA	NA	NA	NA	NA	NA	975	1.27296	NA	NA
chr4	13445989	13485989	-	ENST00000288723	ENSG00000157869	RAB28	protein_coding	NA	NA	1250	0.711797	1675	1.57612	1125	1.1151	NA	NA
chr4	15617035	15657035	-	ENST00000341285	ENSG00000118564	FBXL5	protein_coding	NA	NA	1700	1.56642	NA	NA	NA	NA	NA	NA
chr4	15643242	15683242	-	ENST00000515679	ENSG00000118564	FBXL5	protein_coding	NA	NA	NA	NA	1350	3.40665	NA	NA	1325	1.08515
chr4	16189033	16229033	-	ENST00000513359	ENSG00000169762	TAPT1	protein_coding	NA	NA	NA	NA	NA	NA	1850	1.47351	NA	NA
chr4	25122204	25162204	-	ENST00000302922	ENSG00000109618	SEPSECS	protein_coding	NA	NA	NA	NA	1800	0.584842	1125	1.08487	1475	0.65122
chr4	25235597	25275597	+	ENST00000264864	ENSG00000038210	PI4K2B	protein_coding	NA	NA	NA	NA	2425	0.507141	NA	NA	NA	NA
chr4	25314408	25354408	+	ENST00000302874	ENSG00000168228	ZCCHC4	protein_coding	NA	NA	NA	NA	NA	NA	1025	0.548733	NA	NA
chr4	25378835	25418835	+	ENST00000315368	ENSG00000053900	ANAPC4	protein_coding	NA	NA	NA	NA	NA	NA	NA	NA	1550	0.671182
chr4	25825217	25865217	-	ENST00000264868	ENSG00000091490	SEL1L3	protein_coding	NA	NA	NA	NA	NA	NA	1675	0.842203	NA	NA
chr4	26321284	26361284	+	ENST00000506956	ENSG00000168214	RBPJ	protein_coding	NA	NA	NA	NA	NA	NA	1550	0.870752	1825	0.650893
chr4	31999019	32039019	+	ENST00000513211	ENSG00000251129	RP11-734I18.1	lincRNA	NA	NA	NA	NA	NA	NA	1650	2.78145	1650	0.914327
chr4	37455563	37495563	+	ENST00000381980	ENSG00000154274	C4orf19	protein_coding	NA	NA	NA	NA	NA	NA	NA	NA	1900	2.03547
chr4	38994041	39034041	-	ENST00000381938	ENSG00000121895	TMEM156	protein_coding	NA	NA	NA	NA	NA	NA	1350	1.16338	NA	NA
chr4	40058446	40098446	+	ENST00000261435	ENSG00000078177	N4BP2	protein_coding	NA	NA	NA	NA	NA	NA	1200	0.890904	NA	NA
chr4	40592892	40632892	-	ENST00000511598	ENSG00000163694	RBM47	protein_coding	NA	NA	NA	NA	NA	NA	NA	NA	2000	1.63471
chr4	48231881	48271881	-	ENST00000381501	ENSG00000135605	TEC	protein_coding	NA	NA	NA	NA	NA	NA	1750	1.16338	NA	NA
chr4	54384384	54424384	-	ENST00000306888	ENSG00000072201	LNX1	protein_coding	NA	NA	1125	2.28194	1875	2.03326	NA	NA	NA	NA
chr4	54417783	54457783	-	ENST00000263925	ENSG00000072201	LNX1	protein_coding	NA	NA	NA	NA	NA	NA	NA	NA	1525	0.64533
chr4	55524085	55564085	+	ENST00000412167	ENSG00000157404	KIT	protein_coding	NA	NA	NA	NA	1525	1.28812	NA	NA	NA	NA
chr4	56462865	56502865	-	ENST00000515325	ENSG00000109255	NMU	protein_coding	NA	NA	NA	NA	NA	NA	1150	1.94975	NA	NA
chr4	56719782	56759782	+	ENST00000381295	ENSG00000090989	EXOC1	protein_coding	NA	NA	1075	0.937378	NA	NA	900	1.34181	1750	0.976721
chr4	68371324	68411324	-	ENST00000273853	ENSG00000145241	CENPC1	protein_coding	NA	NA	NA	NA	1925	2.77219	1275	2.91888	1850	1.4929
chr4	73394516	73434516	-	ENST00000286657	ENSG00000156140	ADAMTS3	protein_coding	NA	NA	NA	NA	NA	NA	975	0.964517	NA	NA
chr4	76872113	76912113	-	ENST00000356260	ENSG00000198301	SDAD1	protein_coding	NA	NA	650	0.914915	NA	NA	1000	1.02959	1575	1.2731
chr4	77095046	77135046	-	ENST00000264896	ENSG00000138760	SCARB2	protein_coding	NA	NA	1250	0.932972	NA	NA	NA	NA	NA	NA
chr4	77507293	77547293	+	ENST00000490690	ENSG00000138771	SHROOM3	protein_coding	NA	NA	NA	NA	NA	NA	NA	NA	1975	1.60351
chr4	78078378	78118378	+	ENST00000497512	ENSG00000138764	CCNG2	protein_coding	NA	NA	1300	0.952988	NA	NA	1300	0.813654	NA	NA
chr4	78978724	79018724	+	ENST00000264895	ENSG00000138759	FRAS1	protein_coding	NA	NA	1875	0.543434	NA	NA	NA	NA	1825	0.614241
chr4	79472673	79512673	+	ENST00000264908	ENSG00000138772	ANXA3	protein_coding	NA	NA	NA	NA	NA	NA	1100	0.55797	NA	NA
chr4	80206677	80246677	-	ENST00000511542	ENSG00000156269	NAA11	protein_coding	NA	NA	NA	NA	NA	NA	1250	1.05142	NA	NA
chr4	83443510	83483510	-	ENST00000515780	ENSG00000249242	TMEM150C	protein_coding	NA	NA	NA	NA	NA	NA	NA	NA	2175	2.11336
chr4	83680010	83720010	-	ENST00000319540	ENSG00000145284	SCD5	protein_coding	NA	NA	NA	NA	1900	1.45797	NA	NA	NA	NA
chr4	83894079	83934079	-	ENST00000505397	ENSG00000189308	LIN54	protein_coding	NA	NA	NA	NA	NA	NA	1675	0.794061	1900	0.879529
chr4	84457261	84497261	+	ENST00000395226	ENSG00000138678	AGPAT9	protein_coding	NA	NA	NA	NA	1775	0.620443	NA	NA	NA	NA
chr4	85504132	85544132	+	ENST00000295887	ENSG00000163624	CDS1	protein_coding	NA	NA	NA	NA	NA	NA	NA	NA	2150	1.23994
chr4	87857562	87897562	+	ENST00000511442	ENSG00000172493	AFF1	protein_coding	NA	NA	400	0.508543	NA	NA	NA	NA	NA	NA
chr4	88101760	88141760	-	ENST00000273963	ENSG00000145332	KLHL8	protein_coding	NA	NA	NA	NA	NA	NA	1000	1.14911	1475	0.611951
chr4	88272538	88312538	-	ENST00000358290	ENSG00000198189	HSD17B11	protein_coding	NA	NA	NA	NA	NA	NA	1050	1.89685	NA	NA
chr4	95679119	95719119	+	ENST00000515059	ENSG00000138696	BMPR1B	protein_coding	NA	NA	1225	0.841571	NA	NA	NA	NA	NA	NA
chr4	96430357	96470357	-	ENST00000453304	ENSG00000182168	UNC5C	protein_coding	NA	NA	NA	NA	NA	NA	NA	NA	1675	0.828915
chr4	99916771	99956771	+	ENST00000296411	ENSG00000164024	METAP1	protein_coding	NA	NA	1450	0.659175	NA	NA	1575	1.00636	NA	NA
chr4	103226639	103266639	-	ENST00000512657	ENSG00000138821	SLC39A8	protein_coding	NA	NA	NA	NA	NA	NA	1250	0.640678	NA	NA
chr4	103422486	103462486	+	ENST00000226574	ENSG00000109320	NFKB1	protein_coding	NA	NA	1375	0.695399	NA	NA	NA	NA	NA	NA
chr4	103750053	103790053	-	ENST00000357194	ENSG00000109332	UBE2D3	protein_coding	NA	NA	NA	NA	NA	NA	1175	0.694698	1250	0.57999
chr4	106629941	106669941	+	ENST00000394730	ENSG00000138780	GSTCD	protein_coding	NA	NA	NA	NA	1525	0.64216	1525	1.08935	1850	0.89251
chr4	106815932	106855932	+	ENST00000504304	ENSG00000168743	NPNT	protein_coding	NA	NA	NA	NA	NA	NA	NA	NA	1750	5.32539
chr4	108910870	108950870	+	ENST00000403312	ENSG00000138796	HADH	protein_coding	NA	NA	NA	NA	NA	NA	1000	0.700156	NA	NA
chr4	109050112	109090112	-	ENST00000379951	ENSG00000138795	LEF1	protein_coding	NA	NA	NA	NA	NA	NA	1475	0.810015	NA	NA
chr4	110834040	110874040	+	ENST00000509793	ENSG00000138798	EGF	protein_coding	NA	NA	NA	NA	NA	NA	1075	0.660831	NA	NA
chr4	113066553	113106553	+	ENST00000309733	ENSG00000174749	C4orf32	protein_coding	NA	NA	NA	NA	NA	NA	1475	1.39248	1575	0.76772
chr4	113218499	113258499	+	ENST00000458497	ENSG00000073331	ALPK1	protein_coding	NA	NA	NA	NA	NA	NA	675	0.727586	NA	NA
chr4	113518066	113558066	-	ENST00000309071	ENSG00000138658	C4orf21	protein_coding	NA	NA	NA	NA	1475	0.522984	1975	1.62087	NA	NA
chr4	120375975	120415975	+	ENST00000510011	ENSG00000245958	RP11-33B1.1	pseudogene	NA	NA	NA	NA	NA	NA	NA	NA	3000	0.695399
chr4	120409798	120449798	+	ENST00000498873	ENSG00000245958	RP11-33B1.1	pseudogene	NA	NA	NA	NA	2050	0.654932	NA	NA	NA	NA
chr4	122751652	122791652	-	ENST00000264499	ENSG00000138686	BBS7	protein_coding	NA	NA	25	0.58991	1225	0.642204	1750	0.742281	NA	NA
chr4	127836561	127876561	-	ENST00000515428	ENSG00000249178	RP11-123G5.1	lincRNA	NA	NA	NA	NA	NA	NA	1975	3.68663	NA	NA
chr4	128886461	128926461	+	ENST00000398965	ENSG00000164074	C4orf29	protein_coding	NA	NA	NA	NA	NA	NA	725	0.723387	1725	0.851168
chr4	140587087	140627087	+	ENST00000515137	ENSG00000085871	MGST2	protein_coding	NA	NA	NA	NA	NA	NA	1125	1.07983	NA	NA
chr4	143286413	143326413	-	ENST00000507462	ENSG00000109452	INPP4B	protein_coding	NA	NA	NA	NA	1450	0.987538	NA	NA	NA	NA
chr4	143355561	143395561	-	ENST00000507861	ENSG00000109452	INPP4B	protein_coding	NA	NA	NA	NA	NA	NA	NA	NA	2050	20.9076
chr4	147403123	147443123	-	ENST00000394062	ENSG00000120519	SLC10A7	protein_coding	NA	NA	NA	NA	1150	0.507987	1225	0.621086	NA	NA
chr4	148565381	148605381	-	ENST00000322396	ENSG00000164169	PRMT10	protein_coding	NA	NA	NA	NA	1375	0.624893	1375	0.735143	1775	0.917926
chr4	151896879	151936879	-	ENST00000535741	ENSG00000198589	LRBA	protein_coding	NA	NA	NA	NA	NA	NA	1750	1.59876	2100	1.22979
chr4	152330368	152370368	+	ENST00000508198	ENSG00000164142	FAM160A1	protein_coding	NA	NA	NA	NA	NA	NA	NA	NA	1925	0.616532
chr4	154125598	154165598	+	ENST00000479711	ENSG00000109654	TRIM2	protein_coding	NA	NA	NA	NA	NA	NA	NA	NA	1625	0.576717
chr4	154265801	154305801	+	ENST00000240488	ENSG00000121211	MND1	protein_coding	NA	NA	NA	NA	NA	NA	1175	2.13797	1400	0.753212
chr4	154387498	154427498	+	ENST00000440693	ENSG00000121210	KIAA0922	protein_coding	NA	NA	NA	NA	1550	0.71096	1350	0.967036	1525	1.96381
chr4	159131401	159171401	+	ENST00000296529	ENSG00000164124	TMEM144	protein_coding	NA	NA	NA	NA	NA	NA	450	0.50367	NA	NA
chr4	159690290	159730290	+	ENST00000264433	ENSG00000052795	FNIP2	protein_coding	NA	NA	2025	3.54678	1975	2.52349	1950	0.74228	NA	NA
chr4	166300094	166340094	+	ENST00000402744	ENSG00000109472	CPE	protein_coding	NA	NA	NA	NA	NA	NA	NA	NA	2100	0.500032
chr4	169552766	169592766	+	ENST00000504519	ENSG00000129116	PALLD	protein_coding	NA	NA	925	0.535928	NA	NA	NA	NA	1950	1.07926
chr4	169891409	169931409	-	ENST00000510042	ENSG00000145439	CBR4	protein_coding	NA	NA	NA	NA	1500	1.17133	2275	2.07864	1675	1.19816
chr4	170493780	170533780	-	ENST00000507142	ENSG00000137601	NEK1	protein_coding	NA	NA	NA	NA	NA	NA	1175	1.47365	NA	NA
chr4	170541672	170581672	+	ENST00000513761	ENSG00000109572	CLCN3	protein_coding	NA	NA	NA	NA	1625	0.852564	NA	NA	NA	NA
chr4	174089904	174129904	+	ENST00000265000	ENSG00000109586	GALNT7	protein_coding	NA	NA	NA	NA	NA	NA	1675	1.39891	NA	NA
chr4	183065140	183105140	+	ENST00000513201	ENSG00000218336	ODZ3	protein_coding	NA	NA	1575	3.96851	1600	2.5097	NA	NA	NA	NA
chr4	183370152	183410152	+	ENST00000510504	ENSG00000218336	ODZ3	protein_coding	NA	NA	NA	NA	NA	NA	NA	NA	1375	0.50625
chr4	184580420	184620420	+	ENST00000334690	ENSG00000168538	TRAPPC11	protein_coding	NA	NA	1025	0.578161	NA	NA	1100	1.07452	NA	NA
chr4	185355734	185395734	-	ENST00000393593	ENSG00000168310	IRF2	protein_coding	NA	NA	NA	NA	1350	1.59556	NA	NA	1075	0.528503
chr4	185570767	185610767	+	ENST00000314970	ENSG00000164306	CCDC111	protein_coding	NA	NA	NA	NA	900	0.592518	NA	NA	NA	NA
chr4	186131233	186171233	+	ENST00000264694	ENSG00000109762	SNX25	protein_coding	NA	NA	875	0.695045	NA	NA	NA	NA	1975	0.561773
chr4	187382151	187422151	-	ENST00000508110	ENSG00000251165	RP11-215A19.1	processed_transcript	NA	NA	NA	NA	NA	NA	1200	0.976412	NA	NA
chr4	187605009	187645009	-	ENST00000441802	ENSG00000083857	FAT1	protein_coding	NA	NA	NA	NA	NA	NA	1750	1.08487	NA	NA
chr5	612387	652387	+	ENST00000264935	ENSG00000112877	CEP72	protein_coding	NA	NA	NA	NA	NA	NA	1075	0.74326	NA	NA
chr5	11864155	11904155	-	ENST00000504499	ENSG00000169862	CTNND2	protein_coding	NA	NA	NA	NA	NA	NA	NA	NA	1925	0.50625
chr5	12574969	12614969	+	ENST00000505877	ENSG00000248131	RP11-308B16.1	lincRNA	NA	NA	NA	NA	NA	NA	1275	1.30011	NA	NA
chr5	15500305	15540305	+	ENST00000504595	ENSG00000183580	FBXL7	protein_coding	NA	NA	1500	1.51619	NA	NA	NA	NA	NA	NA
chr5	16896372	16936372	-	ENST00000513610	ENSG00000145555	MYO10	protein_coding	NA	NA	1275	0.892316	NA	NA	NA	NA	1625	0.634094
chr5	19102455	19142455	-	ENST00000504827	ENSG00000249174	RP11-124N3.3	lincRNA	NA	NA	NA	NA	NA	NA	1725	1.71449	NA	NA
chr5	19948339	19988339	-	ENST00000382275	ENSG00000145526	CDH18	protein_coding	NA	NA	NA	NA	1700	1.08942	NA	NA	NA	NA
chr5	24605087	24645087	-	ENST00000264463	ENSG00000040731	CDH10	protein_coding	NA	NA	NA	NA	1750	1.12002	NA	NA	NA	NA
chr5	35190794	35230794	-	ENST00000342362	ENSG00000113494	PRLR	protein_coding	NA	NA	NA	NA	NA	NA	NA	NA	1975	2.94293
chr5	36112063	36152063	-	ENST00000296603	ENSG00000164187	LMBRD2	protein_coding	NA	NA	NA	NA	1300	0.643784	1150	0.584	1175	0.543011
chr5	38516748	38556748	-	ENST00000453190	ENSG00000113594	LIFR	protein_coding	NA	NA	NA	NA	NA	NA	NA	NA	1750	0.617514
chr5	41470730	41510730	-	ENST00000328457	ENSG00000182836	PLCXD3	protein_coding	NA	NA	NA	NA	1625	0.587779	NA	NA	NA	NA
chr5	42423879	42463879	+	ENST00000230882	ENSG00000112964	GHR	protein_coding	NA	NA	NA	NA	NA	NA	NA	NA	2350	0.789864
chr5	42565958	42605958	+	ENST00000511135	ENSG00000112964	GHR	protein_coding	NA	NA	NA	NA	NA	NA	NA	NA	3650	0.50625
chr5	53566412	53606412	-	ENST00000502271	ENSG00000185305	ARL15	protein_coding	NA	NA	NA	NA	NA	NA	1825	3.83484	1900	0.812226
chr5	55250821	55290821	-	ENST00000381298	ENSG00000134352	IL6ST	protein_coding	NA	NA	1325	0.964927	NA	NA	1400	0.98341	1600	0.770229
chr5	60100216	60140216	-	ENST00000508821	ENSG00000164181	ELOVL7	protein_coding	NA	NA	NA	NA	NA	NA	900	1.14197	2150	0.728778
chr5	64064757	64104757	+	ENST00000381070	ENSG00000153015	CWC27	protein_coding	NA	NA	NA	NA	1750	0.659627	1050	0.871452	1325	0.601588
chr5	64737747	64777747	-	ENST00000381055	ENSG00000049192	ADAMTS6	protein_coding	NA	NA	1125	1.98022	1475	3.78785	NA	NA	NA	NA
chr5	64818998	64858998	-	ENST00000396679	ENSG00000123219	CENPK	protein_coding	NA	NA	NA	NA	NA	NA	1200	2.8128	NA	NA
chr5	65084198	65124198	+	ENST00000509935	ENSG00000123213	NLN	protein_coding	NA	NA	NA	NA	NA	NA	NA	NA	2975	0.578572
chr5	67511548	67551548	+	ENST00000521381	ENSG00000145675	PIK3R1	protein_coding	NA	NA	NA	NA	NA	NA	NA	NA	1825	7.6807
chr5	68588636	68628636	-	ENST00000383374	ENSG00000183323	CCDC125	protein_coding	NA	NA	NA	NA	NA	NA	NA	NA	2025	0.645221
chr5	68665124	68705124	+	ENST00000361732	ENSG00000152942	RAD17	protein_coding	NA	NA	700	0.551756	NA	NA	1050	1.11762	1400	0.804263
chr5	68788119	68828119	+	ENST00000355237	ENSG00000197822	OCLN	protein_coding	NA	NA	NA	NA	NA	NA	NA	NA	1800	1.08482
chr5	70883115	70923115	+	ENST00000512218	ENSG00000131844	MCCC2	protein_coding	NA	NA	NA	NA	NA	NA	NA	NA	1725	1.8592
chr5	72144011	72184011	+	ENST00000506351	ENSG00000083312	TNPO1	protein_coding	NA	NA	NA	NA	NA	NA	1250	2.45972	NA	NA
chr5	74807581	74847581	+	ENST00000241436	ENSG00000122008	POLK	protein_coding	NA	NA	1425	1.00376	NA	NA	1850	1.56167	NA	NA
chr5	77656339	77696339	+	ENST00000538629	ENSG00000085365	SCAMP1	processed_transcript	NA	NA	NA	NA	1625	1.04555	NA	NA	1900	0.758557
chr5	78241910	78281910	-	ENST00000565165	ENSG00000113273	ARSB	protein_coding	NA	NA	1725	0.893676	NA	NA	NA	NA	NA	NA
chr5	78491861	78531861	-	ENST00000520388	ENSG00000132837	DMGDH	protein_coding	NA	NA	NA	NA	NA	NA	1475	1.14701	NA	NA
chr5	78532012	78572012	+	ENST00000396137	ENSG00000152409	JMY	protein_coding	NA	NA	NA	NA	NA	NA	1700	1.02064	1700	1.21725
chr5	78770040	78810040	-	ENST00000334082	ENSG00000152413	HOMER1	protein_coding	NA	NA	NA	NA	NA	NA	700	0.535298	NA	NA
chr5	80557379	80597379	-	ENST00000505295	ENSG00000247572	CTC-281B15.1	processed_transcript	NA	NA	NA	NA	1075	0.560121	550	0.820791	NA	NA
chr5	81267844	81307844	+	ENST00000282185	ENSG00000152348	ATG10	protein_coding	NA	NA	NA	NA	NA	NA	475	1.08781	NA	NA
chr5	82373317	82413317	+	ENST00000282268	ENSG00000152422	XRCC4	protein_coding	NA	NA	NA	NA	NA	NA	850	0.685182	NA	NA
chr5	82767284	82807284	+	ENST00000265077	ENSG00000038427	VCAN	protein_coding	NA	NA	1950	5.67795	NA	NA	NA	NA	NA	NA
chr5	82977432	83017432	-	ENST00000274341	ENSG00000145681	HAPLN1	protein_coding	NA	NA	975	0.535656	NA	NA	NA	NA	NA	NA
chr5	83640611	83680611	-	ENST00000296591	ENSG00000164176	EDIL3	protein_coding	NA	NA	1500	1.11956	NA	NA	NA	NA	NA	NA
chr5	87525293	87565293	-	ENST00000503194	ENSG00000164180	TMEM161B	protein_coding	NA	NA	NA	NA	NA	NA	1550	1.4896	2025	1.19052
chr5	88179145	88219145	+	ENST00000511100	ENSG00000248309	CTC-454M9.1	lincRNA	NA	NA	NA	NA	NA	NA	1650	1.13189	NA	NA
chr5	96103803	96143803	-	ENST00000296754	ENSG00000164307	ERAP1	protein_coding	NA	NA	NA	NA	NA	NA	475	0.673846	NA	NA
chr5	96271168	96311168	+	ENST00000231368	ENSG00000113441	LNPEP	protein_coding	NA	NA	925	0.598531	1800	1.72073	1575	0.926731	1825	1.0125
chr5	104688671	104728671	-	ENST00000503650	ENSG00000251574	RP11-6N13.1	lincRNA	NA	NA	NA	NA	NA	NA	1950	2.26967	NA	NA
chr5	106966596	107006596	-	ENST00000333274	ENSG00000184349	EFNA5	protein_coding	NA	NA	1625	0.518986	1325	0.595611	NA	NA	1450	0.990139
chr5	112043195	112083195	+	ENST00000509732	ENSG00000134982	APC	protein_coding	NA	NA	NA	NA	NA	NA	NA	NA	1850	1.15158
chr5	112784527	112824527	-	ENST00000408903	ENSG00000171444	MCC	protein_coding	NA	NA	NA	NA	NA	NA	NA	NA	1600	0.613041
chr5	115177178	115217178	+	ENST00000316788	ENSG00000177879	AP3S1	protein_coding	NA	NA	1600	0.88976	1975	2.46155	1725	0.587359	1975	0.852477
chr5	118604387	118644387	+	ENST00000274456	ENSG00000145779	TNFAIP8	protein_coding	NA	NA	NA	NA	NA	NA	1350	2.53892	NA	NA
chr5	118788138	118828138	+	ENST00000256216	ENSG00000133835	HSD17B4	protein_coding	NA	NA	NA	NA	1225	0.560255	1100	0.954441	1675	0.884983
chr5	122110691	122150691	+	ENST00000379516	ENSG00000205302	SNX2	protein_coding	NA	NA	1575	0.943143	1600	1.99875	1600	0.792241	2150	1.53544
chr5	122847793	122887793	+	ENST00000345990	ENSG00000151292	CSNK1G3	protein_coding	NA	NA	1275	0.974336	NA	NA	1750	0.642218	2000	0.812225
chr5	125891110	125931110	-	ENST00000409134	ENSG00000164904	ALDH7A1	protein_coding	NA	NA	325	0.810215	NA	NA	NA	NA	1350	0.63344
chr5	127833916	127873916	-	ENST00000514742	ENSG00000138829	FBN2	protein_coding	NA	NA	1175	0.530653	1850	4.17413	NA	NA	NA	NA
chr5	130599359	130639359	+	ENST00000506419	ENSG00000158985	CDC42SE2	protein_coding	NA	NA	1275	0.557167	NA	NA	NA	NA	NA	NA
chr5	131665608	131705608	-	ENST00000417795	ENSG00000233006	AC034220.3	processed_transcript	NA	NA	NA	NA	NA	NA	900	0.585259	NA	NA
chr5	133666738	133706738	-	ENST00000519312	ENSG00000006837	CDKL3	protein_coding	NA	NA	NA	NA	NA	NA	750	0.578122	NA	NA
chr5	135468534	135508534	+	ENST00000514641	ENSG00000113658	SMAD5	protein_coding	NA	NA	1775	1.61657	1825	2.98931	1675	1.22034	2200	1.6226
chr5	135802366	135842366	+	ENST00000511165	ENSG00000249803	RP11-114H21.2	lincRNA	NA	NA	NA	NA	NA	NA	1575	1.99761	NA	NA
chr5	136795037	136835037	-	ENST00000394945	ENSG00000152377	SPOCK1	protein_coding	NA	NA	1225	0.587898	1925	2.22019	NA	NA	NA	NA
chr5	138088786	138128786	+	ENST00000523912	ENSG00000044115	CTNNA1	protein_coding	NA	NA	1050	1.23764	NA	NA	1025	1.4416	NA	NA
chr5	138609441	138649441	+	ENST00000509990	ENSG00000015479	MATR3	protein_coding	NA	NA	NA	NA	NA	NA	475	3.41836	3625	3.39911
chr5	139554227	139594227	+	ENST00000261811	ENSG00000120306	CYSTM1	protein_coding	NA	NA	NA	NA	NA	NA	1400	1.12895	NA	NA
chr5	139642706	139682706	-	ENST00000261813	ENSG00000113068	PFDN1	protein_coding	NA	NA	1350	0.822181	NA	NA	1375	1.07815	NA	NA
chr5	139838842	139878842	+	ENST00000246149	ENSG00000131503	ANKHD1	protein_coding	NA	NA	NA	NA	NA	NA	NA	NA	3600	2.78683
chr5	140248689	140288689	+	ENST00000398640	ENSG00000249158	PCDHA11	protein_coding	NA	NA	NA	NA	NA	NA	NA	NA	1725	0.875602
chr5	141704858	141744858	+	ENST00000510311	ENSG00000231185	AC005592.2	processed_transcript	NA	NA	NA	NA	NA	NA	600	0.827928	NA	NA
chr5	142744109	142784109	-	ENST00000503201	ENSG00000113580	NR3C1	protein_coding	NA	NA	1575	5.2573	1825	7.29065	1800	2.57097	1650	0.756594
chr5	145174899	145214899	-	ENST00000394450	ENSG00000186314	PRELID2	protein_coding	NA	NA	NA	NA	NA	NA	900	0.889225	NA	NA
chr5	145522223	145562223	-	ENST00000394434	ENSG00000133706	LARS	protein_coding	NA	NA	NA	NA	1475	0.771905	NA	NA	1475	1.09726
chr5	145826875	145866875	+	ENST00000296702	ENSG00000113649	TCERG1	protein_coding	NA	NA	1375	1.52895	NA	NA	1750	2.67341	NA	NA
chr5	149109861	149149861	+	ENST00000360453	ENSG00000155846	PPARGC1B	protein_coding	NA	NA	NA	NA	NA	NA	1075	0.713731	1625	0.639766
chr5	149737202	149777202	+	ENST00000451292	ENSG00000070814	TCOF1	protein_coding	NA	NA	NA	NA	NA	NA	875	0.968996	NA	NA
chr5	150098671	150138671	-	ENST00000447998	ENSG00000132912	DCTN4	protein_coding	NA	NA	1025	1.284	NA	NA	1025	1.96542	1025	1.63012
chr5	150427221	150467221	-	ENST00000522226	ENSG00000145901	TNIP1	protein_coding	NA	NA	NA	NA	NA	NA	NA	NA	1950	0.751031
chr5	150827157	150867157	+	ENST00000243389	ENSG00000123643	SLC36A1	protein_coding	NA	NA	1300	0.83586	1525	0.805192	NA	NA	1475	0.593407
chr5	153378481	153418481	-	ENST00000520667	ENSG00000055147	FAM114A2	protein_coding	NA	NA	NA	NA	1325	0.663743	1275	0.650895	NA	NA
chr5	153785379	153825379	-	ENST00000519727	ENSG00000245275	CTB-157D17.1	lincRNA	NA	NA	NA	NA	1200	0.517199	1625	0.706594	NA	NA
chr5	154277769	154317769	-	ENST00000285873	ENSG00000082516	GEMIN5	protein_coding	NA	NA	NA	NA	NA	NA	850	0.602753	NA	NA
chr5	155753756	155793756	+	ENST00000435422	ENSG00000170624	SGCD	protein_coding	NA	NA	NA	NA	1850	1.03333	NA	NA	NA	NA
chr5	159436120	159476120	+	ENST00000522793	ENSG00000113312	TTC1	protein_coding	NA	NA	925	0.550668	NA	NA	975	0.756555	1275	1.04621
chr5	167000979	167040979	+	ENST00000520393	ENSG00000145934	ODZ2	protein_coding	NA	NA	975	4.07283	1150	0.509033	NA	NA	NA	NA
chr5	167718656	167758656	+	ENST00000265293	ENSG00000113645	WWC1	protein_coding	NA	NA	NA	NA	NA	NA	NA	NA	1875	1.26688
chr5	168688133	168728133	-	ENST00000519560	ENSG00000184347	SLIT3	protein_coding	NA	NA	NA	NA	1875	0.952248	NA	NA	NA	NA
chr5	169685231	169725231	-	ENST00000046794	ENSG00000043462	LCP2	protein_coding	NA	NA	NA	NA	NA	NA	625	0.680004	NA	NA
chr5	175572158	175612158	-	ENST00000515403	ENSG00000248596	RP11-844P9.2	lincRNA	NA	NA	NA	NA	NA	NA	1025	3.01433	NA	NA
chr5	176393752	176433752	-	ENST00000511320	ENSG00000087206	UIMC1	protein_coding	NA	NA	1275	0.84962	1700	1.57124	NA	NA	2125	1.20819
chr5	179679099	179719099	-	ENST00000343111	ENSG00000050748	MAPK9	protein_coding	NA	NA	NA	NA	NA	NA	75	0.602753	2075	1.17241
chr6	2245982	2285982	+	ENST00000530346	ENSG00000250903	RP1-80B9.2	lincRNA	NA	NA	NA	NA	NA	NA	475	0.620946	NA	NA
chr6	4836332	4876332	+	ENST00000449732	ENSG00000153046	CDYL	protein_coding	NA	NA	NA	NA	NA	NA	NA	NA	2200	2.05664
chr6	7107830	7147830	+	ENST00000379933	ENSG00000124782	RREB1	protein_coding	NA	NA	1800	1.67001	NA	NA	1325	2.70896	NA	NA
chr6	10887064	10927064	+	ENST00000341041	ENSG00000153157	SYCP2L	protein_coding	NA	NA	NA	NA	NA	NA	1350	1.77775	NA	NA
chr6	11004547	11044547	-	ENST00000354666	ENSG00000197977	ELOVL2	protein_coding	NA	NA	NA	NA	NA	NA	NA	NA	2125	14.264
chr6	13447787	13487787	-	ENST00000379287	ENSG00000145990	GFOD1	protein_coding	NA	NA	NA	NA	NA	NA	900	0.628083	NA	NA
chr6	13671796	13711796	-	ENST00000011619	ENSG00000010017	RANBP9	protein_coding	NA	NA	NA	NA	NA	NA	1725	3.26861	NA	NA
chr6	15050234	15090234	-	ENST00000437648	ENSG00000234261	RP11-146I2.1	lincRNA	NA	NA	NA	NA	NA	NA	50	0.514166	NA	NA
chr6	16238811	16278811	+	ENST00000259727	ENSG00000137198	GMPR	protein_coding	NA	NA	NA	NA	NA	NA	525	1.34209	NA	NA
chr6	18155560	18195560	+	ENST00000546309	ENSG00000165097	KDM1B	protein_coding	NA	NA	NA	NA	NA	NA	325	0.50353	NA	NA
chr6	24318280	24358280	-	ENST00000378454	ENSG00000146038	DCDC2	protein_coding	NA	NA	NA	NA	NA	NA	NA	NA	1600	1.10587
chr6	28543989	28583989	-	ENST00000530247	ENSG00000232040	SCAND3	protein_coding	NA	NA	NA	NA	NA	NA	1300	3.38225	NA	NA
chr6	34759857	34799857	+	ENST00000192788	ENSG00000065060	UHRF1BP1	protein_coding	NA	NA	NA	NA	NA	NA	1325	1.69868	1700	0.828915
chr6	34857042	34897042	+	ENST00000360359	ENSG00000064999	ANKS1A	protein_coding	NA	NA	NA	NA	NA	NA	NA	NA	2025	1.18332
chr6	35616719	35656719	-	ENST00000357266	ENSG00000096060	FKBP5	protein_coding	NA	NA	NA	NA	NA	NA	1475	1.44887	1475	0.784409
chr6	37400996	37440996	+	ENST00000373451	ENSG00000137200	FTSJD2	protein_coding	NA	NA	1175	0.540633	NA	NA	NA	NA	NA	NA
chr6	39157226	39197226	-	ENST00000359534	ENSG00000164626	KCNK5	protein_coding	NA	NA	NA	NA	NA	NA	1075	0.84934	NA	NA
chr6	42070182	42110182	-	ENST00000341865	ENSG00000188112	C6orf132	protein_coding	NA	NA	NA	NA	NA	NA	NA	NA	1400	1.00792
chr6	42714696	42754696	+	ENST00000394167	ENSG00000112624	KIAA0240	protein_coding	NA	NA	NA	NA	NA	NA	300	0.918614	NA	NA
chr6	45305690	45345690	-	ENST00000475057	ENSG00000196284	SUPT3H	protein_coding	NA	NA	NA	NA	NA	NA	225	0.790422	NA	NA
chr6	46253405	46293405	-	ENST00000330430	ENSG00000172348	RCAN2	protein_coding	NA	NA	NA	NA	1900	1.4644	NA	NA	NA	NA
chr6	47996425	48036425	-	ENST00000339488	ENSG00000244694	PTCHD4	protein_coding	NA	NA	NA	NA	2975	1.16396	NA	NA	NA	NA
chr6	52226219	52266219	+	ENST00000512121	ENSG00000170915	PAQR8	protein_coding	NA	NA	NA	NA	NA	NA	1250	1.04205	NA	NA
chr6	52285106	52325106	+	ENST00000371068	ENSG00000096093	EFHC1	protein_coding	NA	NA	NA	NA	1650	0.587912	NA	NA	NA	NA
chr6	54711569	54751569	+	ENST00000306858	ENSG00000168143	FAM83B	protein_coding	NA	NA	NA	NA	NA	NA	NA	NA	1750	1.79691
chr6	56819773	56859773	+	ENST00000370750	ENSG00000151917	BEND6	protein_coding	NA	NA	NA	NA	1825	0.67963	NA	NA	NA	NA
chr6	69345259	69385259	+	ENST00000370598	ENSG00000135298	BAI3	protein_coding	NA	NA	NA	NA	NA	NA	2725	2.98634	NA	NA
chr6	70467003	70507003	-	ENST00000370577	ENSG00000168216	LMBRD1	protein_coding	NA	NA	NA	NA	1550	0.546415	1325	0.877889	1900	1.01905
chr6	72596406	72636406	+	ENST00000491071	ENSG00000079841	RIMS1	protein_coding	NA	NA	1600	4.26129	NA	NA	NA	NA	NA	NA
chr6	74171301	74211301	+	ENST00000498286	ENSG00000135297	MTO1	protein_coding	NA	NA	NA	NA	NA	NA	1175	1.79972	1450	0.976831
chr6	80816364	80856364	+	ENST00000369760	ENSG00000083123	BCKDHB	protein_coding	NA	NA	NA	NA	1325	0.556071	NA	NA	NA	NA
chr6	83735560	83775560	-	ENST00000369747	ENSG00000118420	UBE3D	protein_coding	NA	NA	NA	NA	NA	NA	500	0.592397	1325	0.639767
chr6	84897353	84937353	-	ENST00000403245	ENSG00000135315	KIAA1009	protein_coding	NA	NA	NA	NA	NA	NA	975	0.534318	NA	NA
chr6	88259721	88299721	-	ENST00000369536	ENSG00000146282	RARS2	protein_coding	NA	NA	900	0.977627	NA	NA	1075	0.762712	1350	1.3092
chr6	88299839	88339839	+	ENST00000392844	ENSG00000135336	ORC3	protein_coding	NA	NA	NA	NA	1525	0.746828	1125	1.12196	1225	0.676309
chr6	90081989	90121989	-	ENST00000369415	ENSG00000025039	RRAGD	protein_coding	NA	NA	NA	NA	NA	NA	NA	NA	1900	0.500687
chr6	90489442	90529442	-	ENST00000428876	ENSG00000112159	MDN1	protein_coding	NA	NA	NA	NA	NA	NA	NA	NA	2000	0.795536
chr6	96463860	96503860	+	ENST00000302103	ENSG00000172461	FUT9	protein_coding	NA	NA	NA	NA	NA	NA	NA	NA	1875	1.35185
chr6	97691064	97731064	-	ENST00000509383	ENSG00000146263	MMS22L	protein_coding	NA	NA	NA	NA	NA	NA	1125	1.99999	1600	0.648821
chr6	99923301	99963301	-	ENST00000500704	ENSG00000123552	USP45	protein_coding	NA	NA	NA	NA	NA	NA	825	1.07759	NA	NA
chr6	105195289	105235289	-	ENST00000369127	ENSG00000085382	HACE1	protein_coding	NA	NA	NA	NA	700	0.879154	NA	NA	NA	NA
chr6	105267794	105307794	-	ENST00000369125	ENSG00000085382	HACE1	protein_coding	NA	NA	NA	NA	1425	0.672221	1300	0.606671	NA	NA
chr6	105404923	105444923	+	ENST00000345080	ENSG00000187772	LIN28B	protein_coding	NA	NA	NA	NA	NA	NA	1400	1.57007	NA	NA
chr6	108616098	108656098	+	ENST00000368977	ENSG00000135537	LACE1	protein_coding	NA	NA	NA	NA	NA	NA	925	0.628083	NA	NA
chr6	110012499	110052499	+	ENST00000441478	ENSG00000112367	FIG4	protein_coding	NA	NA	NA	NA	1325	0.645297	NA	NA	1250	0.728777
chr6	112154655	112194655	-	ENST00000354650	ENSG00000010810	FYN	protein_coding	NA	NA	1675	0.717508	NA	NA	NA	NA	NA	NA
chr6	112535924	112575924	-	ENST00000519932	ENSG00000112769	LAMA4	protein_coding	NA	NA	NA	NA	1950	3.06632	NA	NA	NA	NA
chr6	116341921	116381921	-	ENST00000368626	ENSG00000111816	FRK	protein_coding	NA	NA	NA	NA	NA	NA	NA	NA	1375	1.22128
chr6	118991238	119031238	-	ENST00000368488	ENSG00000111860	CEP85L	protein_coding	NA	NA	NA	NA	NA	NA	1350	0.942125	NA	NA
chr6	119216327	119256327	-	ENST00000316316	ENSG00000111877	MCM9	protein_coding	NA	NA	NA	NA	NA	NA	1175	0.739482	1825	0.982721
chr6	119360344	119400344	-	ENST00000522284	ENSG00000111879	FAM184A	protein_coding	NA	NA	NA	NA	NA	NA	525	0.728006	NA	NA
chr6	119630926	119670926	-	ENST00000368468	ENSG00000111885	MAN1A1	protein_coding	NA	NA	NA	NA	NA	NA	1325	4.48405	925	0.531121
chr6	122793062	122833062	+	ENST00000392491	ENSG00000135549	PKIB	protein_coding	NA	NA	NA	NA	NA	NA	100	0.563847	NA	NA
chr6	122931377	122971377	+	ENST00000368448	ENSG00000135549	PKIB	protein_coding	NA	NA	NA	NA	NA	NA	NA	NA	1775	2.24197
chr6	125283691	125323691	+	ENST00000521654	ENSG00000146373	RNF217	protein_coding	NA	NA	975	0.918396	NA	NA	1125	3.01349	NA	NA
chr6	125474795	125514795	+	ENST00000304877	ENSG00000111907	TPD52L1	protein_coding	NA	NA	NA	NA	NA	NA	1400	1.1701	2125	2.73098
chr6	125524785	125564785	+	ENST00000392482	ENSG00000111907	TPD52L1	protein_coding	NA	NA	NA	NA	NA	NA	NA	NA	1825	2.6988
chr6	126102307	126142307	+	ENST00000368357	ENSG00000111912	NCOA7	protein_coding	NA	NA	NA	NA	NA	NA	875	1.86256	2950	0.823352
chr6	126307576	126347576	+	ENST00000334379	ENSG00000066651	TRMT11	protein_coding	NA	NA	NA	NA	1750	1.07487	NA	NA	NA	NA
chr6	127624754	127664754	-	ENST00000454859	ENSG00000093144	ECHDC1	protein_coding	NA	NA	1000	0.859683	NA	NA	1050	1.17906	1775	1.02504
chr6	131909369	131949369	-	ENST00000368060	ENSG00000112282	MED23	protein_coding	NA	NA	1375	1.25205	NA	NA	1375	1.8	1550	1.1939
chr6	136831646	136871646	-	ENST00000354570	ENSG00000135525	MAP7	protein_coding	NA	NA	NA	NA	NA	NA	NA	NA	1825	1.83345
chr6	138483058	138523058	+	ENST00000251691	ENSG00000112379	KIAA1244	protein_coding	NA	NA	NA	NA	NA	NA	NA	NA	1950	1.20928
chr6	142622991	142662991	+	ENST00000230173	ENSG00000112414	GPR126	protein_coding	NA	NA	NA	NA	NA	NA	NA	NA	1375	0.92938
chr6	143447387	143487387	+	ENST00000458219	ENSG00000146416	AIG1	protein_coding	NA	NA	NA	NA	950	0.877307	NA	NA	NA	NA
chr6	147981839	148021839	+	ENST00000427015	ENSG00000227681	RP11-307P5.1	lincRNA	NA	NA	NA	NA	NA	NA	1750	2.94771	NA	NA
chr6	148663729	148703729	+	ENST00000367467	ENSG00000111961	SASH1	protein_coding	NA	NA	NA	NA	1600	1.79222	NA	NA	NA	NA
chr6	149639063	149679063	+	ENST00000392282	ENSG00000055208	TAB2	protein_coding	NA	NA	1625	2.23454	1900	3.5813	1725	1.59946	2600	2.42708
chr6	149930108	149970108	-	ENST00000420200	ENSG00000186625	KATNA1	protein_coding	NA	NA	NA	NA	1750	0.798917	NA	NA	NA	NA
chr6	150464212	150504212	+	ENST00000361131	ENSG00000198729	PPP1R14C	protein_coding	NA	NA	NA	NA	NA	NA	1425	0.578122	NA	NA
chr6	151561134	151601134	+	ENST00000402676	ENSG00000131016	AKAP12	protein_coding	NA	NA	NA	NA	1875	0.570445	NA	NA	NA	NA
chr6	151815165	151855165	+	ENST00000239374	ENSG00000120262	CCDC170	protein_coding	NA	NA	NA	NA	NA	NA	NA	NA	1925	1.72459
chr6	155153831	155193831	+	ENST00000461783	ENSG00000146426	TIAM2	protein_coding	NA	NA	NA	NA	NA	NA	NA	NA	3650	2.52013
chr6	157802165	157842165	+	ENST00000359775	ENSG00000175048	ZDHHC14	protein_coding	NA	NA	NA	NA	NA	NA	875	1.16296	NA	NA
chr6	158549312	158589312	-	ENST00000367102	ENSG00000122335	SERAC1	protein_coding	NA	NA	1500	0.84187	1475	0.605068	NA	NA	NA	NA
chr6	158733692	158773692	+	ENST00000367094	ENSG00000130338	TULP4	protein_coding	NA	NA	NA	NA	3125	1.19007	NA	NA	NA	NA
chr6	160108389	160148389	-	ENST00000545162	ENSG00000112096	SOD2	protein_coding	NA	NA	1700	0.71555	NA	NA	NA	NA	NA	NA
chr6	166361527	166401527	-	ENST00000455853	ENSG00000223414	LINC00473	lincRNA	NA	NA	NA	NA	NA	NA	NA	NA	1425	0.774374
chr6	170615830	170655830	+	ENST00000366751	ENSG00000112584	FAM120B	protein_coding	NA	NA	1275	1.12986	NA	NA	1025	1.50597	1675	1.45756
chr7	727287	767287	-	ENST00000403562	ENSG00000188191	PRKAR1B	protein_coding	NA	NA	NA	NA	NA	NA	NA	NA	925	0.626022
chr7	855528	895528	+	ENST00000456758	ENSG00000164828	2013-12-01	protein_coding	NA	NA	NA	NA	NA	NA	NA	NA	1550	1.25172
chr7	1137896	1177896	-	ENST00000491163	ENSG00000146540	C7orf50	protein_coding	NA	NA	NA	NA	NA	NA	NA	NA	1775	0.713615
chr7	2314099	2354099	-	ENST00000222990	ENSG00000106266	SNX8	protein_coding	NA	NA	NA	NA	1025	0.77522	NA	NA	NA	NA
chr7	2794779	2834779	-	ENST00000471281	ENSG00000146535	GNA12	protein_coding	NA	NA	300	0.997234	NA	NA	NA	NA	NA	NA
chr7	5229819	5269819	+	ENST00000288828	ENSG00000157954	WIPI2	protein_coding	NA	NA	1375	0.720472	NA	NA	1025	0.844301	1750	0.969958
chr7	7222178	7262178	+	ENST00000419721	ENSG00000106392	C1GALT1	protein_coding	NA	NA	NA	NA	1375	2.41538	1350	0.951501	NA	NA
chr7	8008425	8048425	+	ENST00000223145	ENSG00000106415	GLCCI1	protein_coding	NA	NA	NA	NA	NA	NA	1325	0.799379	NA	NA
chr7	8262242	8302242	-	ENST00000407906	ENSG00000003147	ICA1	protein_coding	NA	NA	NA	NA	NA	NA	1325	0.920713	NA	NA
chr7	11013499	11053499	+	ENST00000403050	ENSG00000106443	PHF14	protein_coding	NA	NA	NA	NA	1150	0.767232	1125	1.23797	1625	1.54798
chr7	12403567	12443567	-	ENST00000521169	ENSG00000146530	VWDE	protein_coding	NA	NA	NA	NA	NA	NA	1100	6.15363	1275	0.734559
chr7	12610203	12650203	+	ENST00000341757	ENSG00000006747	SCIN	protein_coding	NA	NA	1725	1.82765	NA	NA	NA	NA	1825	3.77937
chr7	13991050	14031050	-	ENST00000421381	ENSG00000006468	ETV1	protein_coding	NA	NA	NA	NA	NA	NA	1850	2.5574	NA	NA
chr7	15686437	15726437	-	ENST00000262041	ENSG00000106511	MEOX2	protein_coding	NA	NA	1200	0.512377	NA	NA	NA	NA	NA	NA
chr7	16420947	16460947	-	ENST00000407010	ENSG00000214960	ISPD	protein_coding	NA	NA	NA	NA	NA	NA	1975	1.58294	NA	NA
chr7	20217027	20257027	-	ENST00000332878	ENSG00000183742	MACC1	protein_coding	NA	NA	NA	NA	NA	NA	725	2.06884	NA	NA
chr7	22500117	22540117	-	ENST00000404369	ENSG00000105889	STEAP1B	protein_coding	NA	NA	NA	NA	1725	0.65313	NA	NA	NA	NA
chr7	24612887	24652887	+	ENST00000432190	ENSG00000105926	MPP6	protein_coding	NA	NA	NA	NA	2100	0.73419	1050	0.63522	NA	NA
chr7	26331541	26371541	+	ENST00000416246	ENSG00000086300	SNX10	protein_coding	NA	NA	NA	NA	NA	NA	700	0.507589	750	0.50625
chr7	27662614	27702614	-	ENST00000265395	ENSG00000106049	HIBADH	protein_coding	NA	NA	NA	NA	NA	NA	725	0.879568	NA	NA
chr7	29989905	30029905	-	ENST00000434476	ENSG00000136193	SCRN1	protein_coding	NA	NA	1375	1.21264	NA	NA	NA	NA	NA	NA
chr7	30067978	30107978	+	ENST00000258679	ENSG00000106086	PLEKHA8	protein_coding	NA	NA	NA	NA	1450	0.518356	NA	NA	NA	NA
chr7	30323923	30363923	+	ENST00000323037	ENSG00000180233	ZNRF2	protein_coding	NA	NA	NA	NA	NA	NA	1400	0.506749	2325	2.1559
chr7	35840542	35880542	+	ENST00000435235	ENSG00000122545	SEPT7	protein_coding	NA	NA	NA	NA	NA	NA	1800	1.12056	NA	NA
chr7	39606005	39646005	+	ENST00000432096	ENSG00000241127	YAE1D1	protein_coding	NA	NA	NA	NA	1050	0.65531	NA	NA	NA	NA
chr7	43798279	43838279	+	ENST00000265523	ENSG00000106605	BLVRA	protein_coding	NA	NA	NA	NA	NA	NA	NA	NA	1025	0.801099
chr7	43926010	43966010	-	ENST00000426198	ENSG00000106608	URGCP	protein_coding	NA	NA	NA	NA	NA	NA	NA	NA	3700	0.517377
chr7	44490479	44530479	-	ENST00000355451	ENSG00000015676	NUDCD3	protein_coding	NA	NA	1175	0.795475	NA	NA	1225	0.856617	NA	NA
chr7	45039074	45079074	+	ENST00000461377	ENSG00000136280	CCM2	protein_coding	NA	NA	825	0.583845	NA	NA	850	1.37764	1650	0.713288
chr7	47979178	48019178	-	ENST00000436444	ENSG00000136273	HUS1	protein_coding	NA	NA	NA	NA	1225	1.66723	1850	0.74228	1825	1.56751
chr7	50344324	50384324	+	ENST00000413698	ENSG00000185811	IKZF1	protein_coding	NA	NA	NA	NA	NA	NA	2625	1.16338	NA	NA
chr7	50821159	50861159	-	ENST00000335866	ENSG00000106070	GRB10	protein_coding	NA	NA	NA	NA	NA	NA	1750	2.38064	NA	NA
chr7	53839624	53879624	-	ENST00000380970	ENSG00000205628	GS1-179L18.1	lincRNA	NA	NA	NA	NA	NA	NA	1025	0.988867	NA	NA
chr7	55600681	55640681	-	ENST00000471168	ENSG00000154978	VOPP1	protein_coding	NA	NA	1700	1.59041	NA	NA	1400	0.646416	NA	NA
chr7	64126511	64166511	+	ENST00000360117	ENSG00000196247	ZNF107	protein_coding	NA	NA	NA	NA	NA	NA	2400	1.83387	2075	3.03347
chr7	65338254	65378254	+	ENST00000360768	ENSG00000196715	VKORC1L1	protein_coding	NA	NA	NA	NA	2000	0.615548	100	0.535298	NA	NA
chr7	66017373	66057373	-	ENST00000445080	ENSG00000232559	GS1-124K5.12	pseudogene	NA	NA	NA	NA	NA	NA	1675	0.827928	NA	NA
chr7	69063905	69103905	+	ENST00000406775	ENSG00000158321	AUTS2	protein_coding	NA	NA	1275	1.91454	1650	0.888188	NA	NA	NA	NA
chr7	73442119	73482119	+	ENST00000252034	ENSG00000049540	ELN	protein_coding	NA	NA	475	0.779621	NA	NA	NA	NA	NA	NA
chr7	74072011	74112011	+	ENST00000324896	ENSG00000077809	GTF2I	protein_coding	NA	NA	NA	NA	NA	NA	NA	NA	1900	2.70219
chr7	75637321	75677321	-	ENST00000248600	ENSG00000127952	STYXL1	protein_coding	NA	NA	NA	NA	NA	NA	675	0.878869	1550	0.814953
chr7	76178677	76218677	+	ENST00000418663	ENSG00000205485	AC004980.7	pseudogene	NA	NA	NA	NA	NA	NA	625	0.649495	875	0.539193
chr7	77325760	77365760	+	ENST00000334955	ENSG00000187257	RSBN1L	protein_coding	NA	NA	NA	NA	NA	NA	NA	NA	1675	1.57744
chr7	77428122	77468122	+	ENST00000422959	ENSG00000006576	PHTF2	protein_coding	NA	NA	NA	NA	NA	NA	1375	1.58448	NA	NA
chr7	84082040	84122040	-	ENST00000424555	ENSG00000075213	SEMA3A	protein_coding	NA	NA	NA	NA	1525	1.16684	NA	NA	NA	NA
chr7	86974997	87014997	+	ENST00000419147	ENSG00000005469	CROT	protein_coding	NA	NA	NA	NA	NA	NA	NA	NA	1475	1.53795
chr7	87465664	87505664	-	ENST00000341119	ENSG00000075303	SLC25A40	protein_coding	NA	NA	NA	NA	1625	0.76988	1275	1.37386	1350	0.909854
chr7	92861653	92901653	+	ENST00000251739	ENSG00000004766	CCDC132	protein_coding	NA	NA	NA	NA	NA	NA	1325	0.638019	1725	0.752557
chr7	93220885	93260885	+	ENST00000455502	ENSG00000127928	GNGT1	protein_coding	NA	NA	NA	NA	NA	NA	1325	1.74374	NA	NA
chr7	93593667	93633667	-	ENST00000357520	ENSG00000105829	BET1	protein_coding	NA	NA	NA	NA	1400	1.09973	1175	1.1785	1300	0.503741
chr7	94139110	94179110	+	ENST00000297273	ENSG00000127995	CASD1	protein_coding	NA	NA	NA	NA	1750	0.541719	NA	NA	1650	0.9068
chr7	95911459	95951459	-	ENST00000416240	ENSG00000004864	SLC25A13	protein_coding	NA	NA	NA	NA	NA	NA	1400	1.19193	1800	1.10151
chr7	98476113	98516113	+	ENST00000355540	ENSG00000196367	TRRAP	protein_coding	NA	NA	NA	NA	NA	NA	NA	NA	1800	1.93043
chr7	102016666	102056666	+	ENST00000462601	ENSG00000128563	PRKRIP1	protein_coding	NA	NA	NA	NA	NA	NA	75	1.30613	NA	NA
chr7	103589963	103629963	-	ENST00000343529	ENSG00000189056	RELN	protein_coding	NA	NA	NA	NA	NA	NA	1525	0.608211	NA	NA
chr7	104869462	104909462	-	ENST00000357311	ENSG00000135250	SRPK2	protein_coding	NA	NA	NA	NA	750	2.1924	NA	NA	NA	NA
chr7	104989838	105029838	-	ENST00000482897	ENSG00000135250	SRPK2	protein_coding	NA	NA	1700	0.827022	NA	NA	NA	NA	NA	NA
chr7	106505723	106545723	+	ENST00000440650	ENSG00000105851	PIK3CG	protein_coding	NA	NA	NA	NA	NA	NA	1075	3.28778	NA	NA
chr7	106685094	106725094	+	ENST00000265717	ENSG00000005249	PRKAR2B	protein_coding	NA	NA	NA	NA	NA	NA	1000	3.64451	NA	NA
chr7	107164959	107204959	-	ENST00000297135	ENSG00000164597	COG5	protein_coding	NA	NA	1450	0.87377	NA	NA	1775	1.96668	1950	0.99472
chr7	111162573	111202573	-	ENST00000331762	ENSG00000184903	IMMP2L	protein_coding	NA	NA	NA	NA	NA	NA	1225	1.64816	1225	0.50625
chr7	112595689	112635689	-	ENST00000451962	ENSG00000234520	AC018464.3	lincRNA	NA	NA	NA	NA	1175	0.705753	NA	NA	NA	NA
chr7	119507429	119547429	-	ENST00000426413	ENSG00000225546	RP11-328J2.1	lincRNA	NA	NA	NA	NA	NA	NA	1450	9.40978	NA	NA
chr7	120628731	120668731	+	ENST00000310396	ENSG00000106034	CPED1	protein_coding	NA	NA	1275	0.887041	NA	NA	1625	10.7282	NA	NA
chr7	122486813	122526813	-	ENST00000334010	ENSG00000081803	CADPS2	protein_coding	NA	NA	NA	NA	NA	NA	NA	NA	1775	1.38916
chr7	127292234	127332234	+	ENST00000354725	ENSG00000197157	SND1	protein_coding	NA	NA	NA	NA	NA	NA	1650	3.54179	1675	2.50856
chr7	128864864	128904864	+	ENST00000325006	ENSG00000158467	AHCYL2	protein_coding	NA	NA	NA	NA	NA	NA	825	0.863614	1625	1.06813
chr7	129074274	129114274	+	ENST00000249344	ENSG00000128578	FAM40B	protein_coding	NA	NA	NA	NA	NA	NA	575	2.67593	NA	NA
chr7	130313598	130353598	-	ENST00000445977	ENSG00000158623	COPG2	protein_coding	NA	NA	NA	NA	1275	0.533643	800	0.882088	1275	0.782773
chr7	134815447	134855447	-	ENST00000459937	ENSG00000122783	C7orf49	protein_coding	NA	NA	NA	NA	NA	NA	1700	2.24616	975	0.622204
chr7	135777673	135817673	+	ENST00000445293	ENSG00000232053	AC009784.3	lincRNA	NA	NA	NA	NA	NA	NA	125	1.19991	NA	NA
chr7	136553416	136593416	+	ENST00000445907	ENSG00000181072	CHRM2	protein_coding	NA	NA	NA	NA	1725	1.16612	NA	NA	NA	NA
chr7	139381841	139421841	-	ENST00000342645	ENSG00000064393	HIPK2	protein_coding	NA	NA	1725	0.977082	NA	NA	NA	NA	NA	NA
chr7	139836835	139876835	-	ENST00000397560	ENSG00000006459	JHDM1D	protein_coding	NA	NA	NA	NA	NA	NA	1375	1.23475	NA	NA
chr7	140058349	140098349	-	ENST00000326232	ENSG00000157800	SLC37A3	protein_coding	NA	NA	NA	NA	NA	NA	900	0.729685	NA	NA
chr7	140300586	140340586	-	ENST00000475837	ENSG00000146966	DENND2A	protein_coding	NA	NA	NA	NA	1050	0.800675	NA	NA	NA	NA
chr7	141361953	141401953	-	ENST00000536163	ENSG00000257093	KIAA1147	protein_coding	NA	NA	NA	NA	NA	NA	NA	NA	1800	0.694962
chr7	144493488	144533488	-	ENST00000552881	ENSG00000196511	TPK1	protein_coding	NA	NA	NA	NA	NA	NA	1250	0.82079	NA	NA
chr7	148823508	148863508	+	ENST00000426851	ENSG00000197024	ZNF398	protein_coding	NA	NA	NA	NA	NA	NA	NA	NA	3950	0.555773
chr7	149980758	150020758	-	ENST00000539352	ENSG00000106526	ACTR3C	protein_coding	NA	NA	NA	NA	NA	NA	NA	NA	1050	0.773283
chr7	151722759	151762759	+	ENST00000482812	ENSG00000178234	GALNT11	protein_coding	NA	NA	NA	NA	NA	NA	225	0.670907	NA	NA
chr7	155437145	155477145	+	ENST00000287912	ENSG00000184863	RBM33	protein_coding	NA	NA	NA	NA	NA	NA	1650	2.62233	1675	2.43013
chr8	2545991	2585991	-	ENST00000523971	ENSG00000254319	RP11-134O21.1	lincRNA	NA	NA	NA	NA	NA	NA	875	2.0137	NA	NA
chr8	2584858	2624858	+	ENST00000520024	ENSG00000253853	GS1-57L11.1	lincRNA	NA	NA	NA	NA	NA	NA	1275	1.42746	NA	NA
chr8	12950983	12990983	-	ENST00000358919	ENSG00000164741	DLC1	protein_coding	NA	NA	1000	4.02712	2350	5.27383	1600	0.517805	2350	6.72339
chr8	13094382	13134382	-	ENST00000503161	ENSG00000164741	DLC1	protein_coding	NA	NA	1550	1.49754	1950	4.84849	NA	NA	1950	0.600824
chr8	15397732	15437732	+	ENST00000382020	ENSG00000104723	TUSC3	protein_coding	NA	NA	NA	NA	1575	0.912908	1350	1.00636	1400	0.578572
chr8	16010300	16050300	-	ENST00000350896	ENSG00000038945	MSR1	protein_coding	NA	NA	NA	NA	1225	0.73103	NA	NA	NA	NA
chr8	16384999	16424999	-	ENST00000522130	ENSG00000038945	MSR1	protein_coding	NA	NA	NA	NA	2150	1.67502	NA	NA	NA	NA
chr8	17104080	17144080	+	ENST00000324849	ENSG00000155975	VPS37A	protein_coding	NA	NA	1350	1.15064	NA	NA	1625	1.81945	NA	NA
chr8	17354597	17394597	+	ENST00000494857	ENSG00000003989	SLC7A2	protein_coding	NA	NA	NA	NA	NA	NA	NA	NA	2150	8.81886
chr8	17780349	17820349	+	ENST00000325083	ENSG00000078674	PCM1	protein_coding	NA	NA	1375	0.891283	NA	NA	NA	NA	NA	NA
chr8	18902240	18942240	-	ENST00000521475	ENSG00000156011	PSD3	protein_coding	NA	NA	900	0.87328	1675	1.09067	NA	NA	NA	NA
chr8	22224762	22264762	+	ENST00000359741	ENSG00000104635	SLC39A14	protein_coding	NA	NA	1300	0.562987	NA	NA	NA	NA	1300	0.639767
chr8	22298332	22338332	+	ENST00000518852	ENSG00000120910	PPP3CC	protein_coding	NA	NA	1575	1.35669	NA	NA	1600	0.835065	NA	NA
chr8	22886692	22926692	-	ENST00000276431	ENSG00000120889	TNFRSF10B	protein_coding	NA	NA	1050	1.09737	NA	NA	1100	3.43557	1575	2.82185
chr8	23275208	23315208	-	ENST00000356206	ENSG00000197217	ENTPD4	protein_coding	NA	NA	NA	NA	NA	NA	2950	0.998944	NA	NA
chr8	28351729	28391729	+	ENST00000537916	ENSG00000104290	FZD3	protein_coding	NA	NA	NA	NA	NA	NA	NA	NA	1650	1.04632
chr8	28707759	28747759	-	ENST00000416984	ENSG00000104299	INTS9	protein_coding	NA	NA	NA	NA	NA	NA	775	0.803297	1650	0.500687
chr8	29080641	29120641	-	ENST00000522355	ENSG00000197892	KIF13B	protein_coding	NA	NA	NA	NA	NA	NA	1550	1.5397	NA	NA
chr8	29952941	29992941	+	ENST00000442880	ENSG00000104660	LEPROTL1	protein_coding	NA	NA	975	0.760802	1500	0.678028	1325	1.89853	1875	1.14602
chr8	37311431	37351431	-	ENST00000522718	ENSG00000253161	RP11-150O12.1	lincRNA	NA	NA	NA	NA	1350	1.24565	NA	NA	NA	NA
chr8	37716985	37756985	-	ENST00000287263	ENSG00000156675	RAB11FIP1	protein_coding	NA	NA	NA	NA	NA	NA	1375	2.86206	1700	1.21277
chr8	41435719	41475719	+	ENST00000396987	ENSG00000158669	AGPAT6	protein_coding	NA	NA	775	0.525023	NA	NA	1025	0.506749	1325	1.82604
chr8	41615140	41655140	-	ENST00000289734	ENSG00000029534	ANK1	protein_coding	NA	NA	NA	NA	NA	NA	1250	1.59162	NA	NA
chr8	42711866	42751866	-	ENST00000319073	ENSG00000120925	RNF170	protein_coding	NA	NA	NA	NA	1250	0.679786	NA	NA	NA	NA
chr8	42995556	43035556	+	ENST00000458501	ENSG00000165102	HGSNAT	protein_coding	NA	NA	NA	NA	700	0.841773	NA	NA	NA	NA
chr8	58907068	58947068	+	ENST00000519262	ENSG00000169122	FAM110B	protein_coding	NA	NA	NA	NA	NA	NA	NA	NA	1700	1.49093
chr8	59532403	59572403	-	ENST00000038176	ENSG00000035681	NSMAF	protein_coding	NA	NA	NA	NA	1600	1.76229	1025	1.40941	1375	0.768047
chr8	61153971	61193971	-	ENST00000317995	ENSG00000178538	CA8	protein_coding	NA	NA	NA	NA	NA	NA	975	1.09201	1650	0.828915
chr8	61591337	61631337	+	ENST00000307121	ENSG00000171316	CHD7	protein_coding	NA	NA	NA	NA	NA	NA	1825	1.12056	2075	1.66339
chr8	66556124	66596124	+	ENST00000518609	ENSG00000066855	MTFR1	protein_coding	NA	NA	NA	NA	NA	NA	1725	0.885587	NA	NA
chr8	66619280	66659280	+	ENST00000521247	ENSG00000066855	MTFR1	protein_coding	NA	NA	2200	0.537044	NA	NA	NA	NA	NA	NA
chr8	67687449	67727449	+	ENST00000521960	ENSG00000104205	SGK3	protein_coding	NA	NA	NA	NA	NA	NA	NA	NA	1975	3.75035
chr8	70404996	70444996	+	ENST00000402687	ENSG00000137573	SULF1	protein_coding	NA	NA	NA	NA	1750	2.63141	NA	NA	NA	NA
chr8	74619943	74659943	-	ENST00000522509	ENSG00000040341	STAU2	protein_coding	NA	NA	NA	NA	1025	0.666836	975	1.61877	NA	NA
chr8	75193563	75233563	-	ENST00000342232	ENSG00000104369	JPH1	protein_coding	NA	NA	NA	NA	NA	NA	NA	NA	2775	3.53055
chr8	75896750	75936750	+	ENST00000262207	ENSG00000121005	CRISPLD1	protein_coding	NA	NA	NA	NA	NA	NA	NA	NA	1625	0.800772
chr8	77593454	77633454	+	ENST00000521891	ENSG00000091656	ZFHX4	protein_coding	NA	NA	1425	0.735239	1975	1.46878	NA	NA	NA	NA
chr8	80523049	80563049	+	ENST00000220876	ENSG00000104435	STMN2	protein_coding	NA	NA	1325	0.919783	NA	NA	NA	NA	NA	NA
chr8	81043894	81083894	-	ENST00000518937	ENSG00000076554	TPD52	protein_coding	NA	NA	NA	NA	NA	NA	NA	NA	2050	3.10982
chr8	87354967	87394967	+	ENST00000517970	ENSG00000123124	WWP1	protein_coding	NA	NA	1600	0.889406	NA	NA	1700	0.613809	NA	NA
chr8	87526656	87566656	+	ENST00000521271	ENSG00000085719	CPNE3	protein_coding	NA	NA	1075	0.537859	1550	2.23232	550	0.533199	1250	4.37081
chr8	91013633	91053633	+	ENST00000220764	ENSG00000104325	DECR1	protein_coding	NA	NA	1500	0.996554	NA	NA	1650	4.06995	1500	3.55902
chr8	93075514	93115514	-	ENST00000518832	ENSG00000079102	RUNX1T1	protein_coding	NA	NA	1250	1.5222	NA	NA	NA	NA	NA	NA
chr8	93938373	93978373	-	ENST00000521988	ENSG00000205133	TRIQK	protein_coding	NA	NA	NA	NA	1525	0.763583	NA	NA	1875	2.17826
chr8	95447337	95487337	-	ENST00000336148	ENSG00000197275	RAD54B	protein_coding	NA	NA	NA	NA	1500	0.698566	NA	NA	1525	1.67943
chr8	95653302	95693302	+	ENST00000423620	ENSG00000104413	ESRP1	protein_coding	NA	NA	NA	NA	NA	NA	NA	NA	1425	7.19266
chr8	95732128	95772128	+	ENST00000414645	ENSG00000156162	DPY19L4	protein_coding	NA	NA	NA	NA	1675	0.79133	925	1.01798	1200	1.80138
chr8	96037296	96077296	+	ENST00000286687	ENSG00000156170	NDUFAF6	protein_coding	NA	NA	NA	NA	NA	NA	1250	1.44873	1975	3.42038
chr8	102504660	102544660	+	ENST00000251808	ENSG00000083307	GRHL2	protein_coding	NA	NA	NA	NA	NA	NA	NA	NA	1775	9.00594
chr8	103876646	103916646	+	ENST00000520750	ENSG00000253320	KB-1507C5.2	protein_coding	NA	NA	NA	NA	NA	NA	NA	NA	1850	0.917817
chr8	104152938	104192938	+	ENST00000309982	ENSG00000164929	BAALC	protein_coding	NA	NA	1650	0.531686	NA	NA	NA	NA	NA	NA
chr8	105602961	105642961	+	ENST00000521923	ENSG00000253350	RP11-127H5.1	protein_coding	NA	NA	NA	NA	NA	NA	1550	0.987608	NA	NA
chr8	106330920	106370920	+	ENST00000407775	ENSG00000169946	ZFPM2	protein_coding	NA	NA	NA	NA	1550	0.985624	2150	4.45579	NA	NA
chr8	107032752	107072752	-	ENST00000520433	ENSG00000251003	RP11-152P17.2	processed_transcript	NA	NA	NA	NA	NA	NA	1475	2.19116	NA	NA
chr8	107282473	107322473	+	ENST00000445937	ENSG00000164830	OXR1	protein_coding	NA	NA	575	0.718378	NA	NA	NA	NA	NA	NA
chr8	107669896	107709896	+	ENST00000435082	ENSG00000164830	OXR1	protein_coding	NA	NA	NA	NA	NA	NA	1375	0.706873	1825	1.66459
chr8	108308750	108348750	-	ENST00000520052	ENSG00000154188	ANGPT1	protein_coding	NA	NA	NA	NA	NA	NA	1750	3.51296	NA	NA
chr8	109220994	109260994	-	ENST00000220849	ENSG00000104408	EIF3E	protein_coding	NA	NA	NA	NA	NA	NA	1750	6.45913	2050	7.22277
chr8	109455853	109495853	+	ENST00000220853	ENSG00000104412	EMC2	protein_coding	NA	NA	NA	NA	NA	NA	1275	0.655933	1575	2.13027
chr8	117728068	117768068	-	ENST00000522800	ENSG00000147677	EIF3H	protein_coding	NA	NA	1575	0.936345	NA	NA	NA	NA	NA	NA
chr8	120611079	120651079	-	ENST00000075322	ENSG00000136960	ENPP2	protein_coding	NA	NA	NA	NA	1450	1.6248	NA	NA	NA	NA
chr8	121457666	121497666	+	ENST00000305949	ENSG00000172167	MTBP	protein_coding	NA	NA	NA	NA	1700	0.748653	1225	0.996425	NA	NA
chr8	124084920	124124920	+	ENST00000309336	ENSG00000156787	WDR67	protein_coding	NA	NA	NA	NA	NA	NA	1175	1.52123	1100	1.30179
chr8	125511350	125551350	-	ENST00000519776	ENSG00000147687	TATDN1	protein_coding	NA	NA	NA	NA	1125	1.31549	850	0.986068	1500	9.82689
chr8	128902874	128942874	+	ENST00000513868	ENSG00000249859	PVT1	lincRNA	NA	NA	75	1.21191	NA	NA	NA	NA	NA	NA
chr8	130547262	130587262	-	ENST00000523151	ENSG00000229140	CCDC26	lincRNA	NA	NA	NA	NA	NA	NA	750	7.85245	NA	NA
chr8	130989375	131029375	-	ENST00000523993	ENSG00000153310	FAM49B	protein_coding	NA	NA	NA	NA	NA	NA	900	0.780626	2175	0.556209
chr8	132916335	132956335	+	ENST00000254624	ENSG00000132294	EFR3A	protein_coding	NA	NA	1525	2.18108	NA	NA	1625	1.209	NA	NA
chr8	133787618	133827618	+	ENST00000395383	ENSG00000129292	PHF20L1	protein_coding	NA	NA	850	1.23097	NA	NA	1075	1.25141	1575	1.24037
chr8	141605718	141645718	-	ENST00000220592	ENSG00000123908	EIF2C2	protein_coding	NA	NA	NA	NA	NA	NA	975	0.628083	2425	1.06257
chr8	141972315	142012315	-	ENST00000519635	ENSG00000169398	PTK2	protein_coding	NA	NA	NA	NA	NA	NA	1800	1.26372	2050	1.55769
chr9	214854	254854	+	ENST00000469197	ENSG00000107099	DOCK8	protein_coding	NA	NA	NA	NA	NA	NA	1350	1.38464	NA	NA
chr9	2804241	2844241	-	ENST00000397885	ENSG00000080608	KIAA0020	protein_coding	NA	NA	1825	1.16804	1850	2.01021	1800	1.06164	1975	1.26186
chr9	4259916	4299916	-	ENST00000477901	ENSG00000107249	GLIS3	protein_coding	NA	NA	NA	NA	1325	0.814248	NA	NA	NA	NA
chr9	4490444	4530444	+	ENST00000262352	ENSG00000106688	SLC1A1	protein_coding	NA	NA	NA	NA	1425	0.552088	NA	NA	NA	NA
chr9	5629025	5669025	+	ENST00000251879	ENSG00000107036	KIAA1432	protein_coding	NA	NA	1800	1.74079	NA	NA	1825	1.11104	1825	0.972795
chr9	5793117	5833117	-	ENST00000339450	ENSG00000099219	ERMP1	protein_coding	NA	NA	NA	NA	NA	NA	950	0.670907	1550	1.45199
chr9	12775020	12815020	+	ENST00000319264	ENSG00000153714	LURAP1L	protein_coding	NA	NA	1900	2.72073	1775	2.19278	NA	NA	2100	3.46074
chr9	17134980	17174980	+	ENST00000380647	ENSG00000044459	CNTLN	protein_coding	NA	NA	NA	NA	1425	0.553312	NA	NA	NA	NA
chr9	19063117	19103117	-	ENST00000380502	ENSG00000147874	HAUS6	protein_coding	NA	NA	NA	NA	1800	1.43302	NA	NA	1900	0.682745
chr9	19409057	19449057	+	ENST00000340967	ENSG00000177076	ACER2	protein_coding	NA	NA	NA	NA	NA	NA	NA	NA	1850	0.650566
chr9	26852802	26892802	-	ENST00000333916	ENSG00000120159	CAAP1	protein_coding	NA	NA	NA	NA	1275	0.814448	1550	0.971514	1575	0.780046
chr9	71320575	71360575	+	ENST00000541509	ENSG00000107242	PIP5K1B	protein_coding	NA	NA	NA	NA	NA	NA	1050	0.713731	NA	NA
chr9	71789081	71829081	+	ENST00000377245	ENSG00000119139	TJP2	protein_coding	NA	NA	NA	NA	NA	NA	NA	NA	1325	0.812225
chr9	71939488	71979488	+	ENST00000455972	ENSG00000135063	FAM189A2	protein_coding	NA	NA	NA	NA	NA	NA	NA	NA	1725	1.17383
chr9	72247222	72287222	-	ENST00000265381	ENSG00000107282	APBA1	protein_coding	NA	NA	1300	0.53737	NA	NA	NA	NA	NA	NA
chr9	74729511	74769511	+	ENST00000545168	ENSG00000119125	GDA	protein_coding	NA	NA	NA	NA	NA	NA	775	1.02134	NA	NA
chr9	75527971	75567971	-	ENST00000297785	ENSG00000165092	ALDH1A1	protein_coding	NA	NA	NA	NA	NA	NA	1300	0.659012	NA	NA
chr9	79481003	79521003	-	ENST00000376718	ENSG00000106772	PRUNE2	protein_coding	NA	NA	600	0.732383	NA	NA	NA	NA	NA	NA
chr9	80223223	80263223	-	ENST00000341700	ENSG00000156049	GNA14	protein_coding	NA	NA	1275	0.741004	NA	NA	NA	NA	NA	NA
chr9	80850978	80890978	+	ENST00000424347	ENSG00000148019	CEP78	protein_coding	NA	NA	NA	NA	1875	0.567931	1800	0.614369	1600	0.651766
chr9	84264220	84304220	-	ENST00000376499	ENSG00000196781	TLE1	protein_coding	NA	NA	NA	NA	NA	NA	NA	NA	1325	0.9068
chr9	85638043	85678043	-	ENST00000376447	ENSG00000165105	RASEF	protein_coding	NA	NA	NA	NA	NA	NA	NA	NA	775	2.50202
chr9	86283118	86323118	-	ENST00000376395	ENSG00000135018	UBQLN1	protein_coding	NA	NA	1500	1.58611	NA	NA	2225	1.29577	2075	2.36905
chr9	90112143	90152143	+	ENST00000358077	ENSG00000196730	DAPK1	protein_coding	NA	NA	NA	NA	NA	NA	1075	1.00034	NA	NA
chr9	91150020	91190020	+	ENST00000487646	ENSG00000130045	NXNL2	protein_coding	NA	NA	NA	NA	NA	NA	NA	NA	1875	2.89755
chr9	93564069	93604069	+	ENST00000375751	ENSG00000165025	SYK	protein_coding	NA	NA	NA	NA	NA	NA	1150	0.642358	NA	NA
chr9	95087766	95127766	+	ENST00000375587	ENSG00000188312	CENPP	protein_coding	NA	NA	NA	NA	NA	NA	NA	NA	1625	0.561445
chr9	96338689	96378689	+	ENST00000359246	ENSG00000197724	PHF2	protein_coding	NA	NA	NA	NA	1800	0.634061	NA	NA	1775	0.634204
chr9	98637983	98677983	+	ENST00000288985	ENSG00000182150	ERCC6L2	protein_coding	NA	NA	NA	NA	NA	NA	1500	0.92841	NA	NA
chr9	100263462	100303462	+	ENST00000395211	ENSG00000136842	TMOD1	protein_coding	NA	NA	NA	NA	NA	NA	1175	0.898041	NA	NA
chr9	101569981	101609981	+	ENST00000375011	ENSG00000119514	GALNT12	protein_coding	NA	NA	NA	NA	NA	NA	825	0.855778	NA	NA
chr9	101867371	101907371	+	ENST00000374994	ENSG00000106799	TGFBR1	protein_coding	NA	NA	1300	1.49185	1925	1.81309	1925	2.26253	NA	NA
chr9	102668915	102708915	+	ENST00000259400	ENSG00000136874	STX17	protein_coding	NA	NA	NA	NA	NA	NA	1225	0.736962	NA	NA
chr9	109625378	109665378	+	ENST00000277225	ENSG00000148143	ZNF462	protein_coding	NA	NA	NA	NA	1750	0.771749	NA	NA	1500	0.906909
chr9	111735809	111775809	-	ENST00000325551	ENSG00000119326	CTNNAL1	protein_coding	NA	NA	NA	NA	1700	2.7849	NA	NA	NA	NA
chr9	112220593	112260593	-	ENST00000394831	ENSG00000070159	PTPN3	protein_coding	NA	NA	NA	NA	NA	NA	NA	NA	1075	0.678709
chr9	112810878	112850878	+	ENST00000434623	ENSG00000241978	AKAP2	protein_coding	NA	NA	1475	4.55225	2100	7.53917	NA	NA	NA	NA
chr9	114322135	114362135	-	ENST00000538962	ENSG00000106853	PTGR1	protein_coding	NA	NA	NA	NA	1100	0.577677	NA	NA	825	0.570609
chr9	114897688	114937688	-	ENST00000374270	ENSG00000106868	SUSD1	protein_coding	NA	NA	NA	NA	NA	NA	1875	1.70806	NA	NA
chr9	115142217	115182217	+	ENST00000398805	ENSG00000119471	HSDL2	protein_coding	NA	NA	NA	NA	1350	0.74823	NA	NA	1275	0.568972
chr9	115249127	115289127	+	ENST00000337530	ENSG00000165185	KIAA1958	protein_coding	NA	NA	NA	NA	NA	NA	1250	1.08319	NA	NA
chr9	123837141	123877141	+	ENST00000373865	ENSG00000119397	CNTRL	protein_coding	NA	NA	NA	NA	NA	NA	1175	1.01266	NA	NA
chr9	125990855	126030855	-	ENST00000360998	ENSG00000165209	STRBP	protein_coding	NA	NA	NA	NA	NA	NA	1825	4.13964	2275	1.74401
chr9	127493589	127533589	-	ENST00000416460	ENSG00000148200	NR6A1	protein_coding	NA	NA	NA	NA	NA	NA	1600	1.67727	1850	0.801099
chr9	129376722	129416722	+	ENST00000526117	ENSG00000136944	LMX1B	protein_coding	NA	NA	NA	NA	NA	NA	NA	NA	1550	0.622313
chr9	130374544	130414544	+	ENST00000373302	ENSG00000136854	STXBP1	protein_coding	NA	NA	NA	NA	1600	0.578478	NA	NA	NA	NA
chr9	130830480	130870480	+	ENST00000373068	ENSG00000148339	SLC25A25	protein_coding	NA	NA	NA	NA	1425	0.903318	1475	1.65586	1775	2.22364
chr9	132765473	132805473	-	ENST00000420781	ENSG00000187239	FNBP1	protein_coding	NA	NA	NA	NA	1725	1.16492	NA	NA	NA	NA
chr9	133320094	133360094	+	ENST00000334909	ENSG00000130707	ASS1	protein_coding	NA	NA	NA	NA	NA	NA	NA	NA	1325	0.961668
chr9	135190372	135230372	-	ENST00000372169	ENSG00000107290	SETX	protein_coding	NA	NA	NA	NA	1250	2.36453	350	1.25813	725	1.18452
chr9	135780008	135820008	-	ENST00000298552	ENSG00000165699	TSC1	protein_coding	NA	NA	1600	0.789085	NA	NA	1000	0.580501	2250	1.42025
chr9	139780970	139820970	+	ENST00000247668	ENSG00000127191	TRAF2	protein_coding	NA	NA	NA	NA	NA	NA	1250	0.535298	2100	0.528394
chrX	11405893	11445893	-	ENST00000380736	ENSG00000047648	ARHGAP6	protein_coding	NA	NA	NA	NA	NA	NA	2100	4.5112	NA	NA
chrX	19777869	19817869	-	ENST00000379698	ENSG00000147010	SH3KBP1	protein_coding	NA	NA	NA	NA	1050	0.629121	NA	NA	NA	NA
chrX	19865719	19905719	-	ENST00000397821	ENSG00000147010	SH3KBP1	protein_coding	NA	NA	1125	0.560376	NA	NA	NA	NA	NA	NA
chrX	21857754	21897754	+	ENST00000379484	ENSG00000012174	MBTPS2	protein_coding	NA	NA	NA	NA	1525	0.590071	1600	0.889365	1575	0.809608
chrX	24483338	24523338	+	ENST00000379162	ENSG00000067992	PDK3	protein_coding	NA	NA	NA	NA	NA	NA	NA	NA	1800	0.828915
chrX	24712036	24752036	+	ENST00000379068	ENSG00000101868	POLA1	protein_coding	NA	NA	NA	NA	1450	0.679163	1300	0.860396	1450	0.77481
chrX	37545012	37585012	+	ENST00000378616	ENSG00000047597	XK	protein_coding	NA	NA	NA	NA	NA	NA	1200	0.68966	NA	NA
chrX	37765400	37805400	+	ENST00000567273	ENSG00000259977	AL121578.2	processed_transcript	NA	NA	NA	NA	NA	NA	NA	NA	1375	1.67452
chrX	46578490	46618490	-	ENST00000328306	ENSG00000065923	SLC9A7	protein_coding	NA	NA	1575	0.783428	2025	1.87432	NA	NA	2450	1.81916
chrX	46771711	46811711	+	ENST00000424392	ENSG00000102221	PHF16	protein_coding	NA	NA	NA	NA	NA	NA	NA	NA	2125	1.23623
chrX	47696301	47736301	+	ENST00000338637	ENSG00000197779	ZNF81	protein_coding	NA	NA	NA	NA	1550	0.502113	NA	NA	NA	NA
chrX	65382391	65422391	+	ENST00000519389	ENSG00000089472	HEPH	protein_coding	NA	NA	NA	NA	NA	NA	1175	4.4709	NA	NA
chrX	65818892	65858892	-	ENST00000451436	ENSG00000131080	EDA2R	protein_coding	NA	NA	775	0.704835	1775	1.38516	NA	NA	1800	0.734341
chrX	66764465	66804465	+	ENST00000374690	ENSG00000169083	AR	protein_coding	NA	NA	NA	NA	NA	NA	NA	NA	1700	3.05877
chrX	71401526	71441526	+	ENST00000423432	ENSG00000102309	PIN4	protein_coding	NA	NA	NA	NA	1225	0.756174	NA	NA	850	0.636604
chrX	74336567	74376567	-	ENST00000526404	ENSG00000131269	ABCB7	protein_coding	NA	NA	NA	NA	NA	NA	825	0.670907	1900	0.500687
chrX	77111090	77151090	-	ENST00000358075	ENSG00000102158	MAGT1	protein_coding	NA	NA	NA	NA	NA	NA	NA	NA	1325	0.546065
chrX	80025187	80065187	-	ENST00000373275	ENSG00000165288	BRWD3	protein_coding	NA	NA	NA	NA	1625	0.924924	NA	NA	NA	NA
chrX	84594748	84634748	-	ENST00000262753	ENSG00000124429	POF1B	protein_coding	NA	NA	NA	NA	NA	NA	NA	NA	1325	0.761611
chrX	106409670	106449670	-	ENST00000372461	ENSG00000198088	NUP62CL	protein_coding	NA	NA	NA	NA	NA	NA	1650	1.29899	NA	NA
chrX	107683112	107723112	+	ENST00000361603	ENSG00000188153	COL4A5	protein_coding	NA	NA	NA	NA	NA	NA	NA	NA	1075	0.639003
chrX	117861535	117901535	+	ENST00000371666	ENSG00000131724	IL13RA1	protein_coding	NA	NA	NA	NA	1825	1.12961	NA	NA	NA	NA
chrX	129997208	130037208	-	ENST00000370935	ENSG00000165675	ENOX2	protein_coding	NA	NA	NA	NA	NA	NA	775	0.917354	800	0.624059
chrX	131157293	131197293	+	ENST00000394334	ENSG00000134602	MST4	protein_coding	NA	NA	NA	NA	NA	NA	1825	1.99005	1775	0.812225
chrX	133594183	133634183	+	ENST00000298556	ENSG00000165704	HPRT1	protein_coding	NA	NA	NA	NA	1800	0.674891	NA	NA	1675	0.78681
chrX	134654584	134694584	+	ENST00000370752	ENSG00000165359	DDX26B	protein_coding	NA	NA	NA	NA	NA	NA	1700	1.78209	2125	0.511813
chrX	135067598	135107598	+	ENST00000370701	ENSG00000198689	SLC9A6	protein_coding	NA	NA	NA	NA	1550	0.569266	1450	0.563848	NA	NA
chrX	135991554	136031554	+	ENST00000424306	ENSG00000234062	RP11-308D16.4	processed_transcript	NA	NA	NA	NA	NA	NA	1150	0.749417	NA	NA
chrX	138032729	138072729	-	ENST00000455663	ENSG00000129682	FGF13	protein_coding	NA	NA	NA	NA	1800	0.866894	NA	NA	NA	NA
chrX	138247168	138287168	-	ENST00000436198	ENSG00000129682	FGF13	protein_coding	NA	NA	NA	NA	NA	NA	1875	1.79874	NA	NA
chrX	149861435	149901435	+	ENST00000541925	ENSG00000063601	MTMR1	protein_coding	NA	NA	NA	NA	NA	NA	1550	0.735143	1950	0.912362
chrX	153939858	153979858	-	ENST00000496390	ENSG00000160219	GAB3	protein_coding	NA	NA	NA	NA	NA	NA	1650	0.92785	NA	NA
chrX	154523966	154563966	-	ENST00000321926	ENSG00000155962	CLIC2	protein_coding	NA	NA	NA	NA	NA	NA	900	0.737662	NA	NA
chr1	154560474	154600474	-	ENST00000292205	ENSG00000160710	ADAR	protein_coding	3125	1.07449	900	0.507673	1150	1.06624	650	0.535718	2700	1.16042
chr17	30535321	30575321	+	ENST00000584852	ENSG00000126858	RHOT1	protein_coding	2850	0.717567	1750	0.75229	NA	NA	NA	NA	NA	NA
chr7	143559248	143599248	-	ENST00000479870	ENSG00000198420	FAM115A	protein_coding	2750	1.86128	975	0.50343	1475	2.57307	1600	1.271	2675	1.35491
chr1	70671365	70711365	+	ENST00000370951	ENSG00000116754	SRSF11	protein_coding	2625	3.70409	2750	1.85458	2750	3.64318	2750	3.95477	3050	1.36342
chr7	18535333	18575333	+	ENST00000413380	ENSG00000048052	HDAC9	protein_coding	2575	2.92493	150	0.918015	NA	NA	NA	NA	NA	NA
chr5	134240596	134280596	+	ENST00000254908	ENSG00000132570	PCBD2	protein_coding	2550	1.14848	NA	NA	2350	1.01617	225	1.52249	2600	1.2851
chr12	123978265	124018265	-	ENST00000376874	ENSG00000188026	RILPL1	protein_coding	2525	1.08605	2575	0.640737	2725	0.637532	500	0.678045	2350	0.867858
chr19	37808813	37848813	+	ENST00000544914	ENSG00000181666	HKR1	protein_coding	2450	1.08239	NA	NA	2425	0.611899	NA	NA	2925	0.840042
chr20	61529274	61569274	-	ENST00000395335	ENSG00000101191	DIDO1	protein_coding	2425	3.06946	2450	1.01594	2650	2.00111	2425	1.69154	2650	3.18673
chr6	56676749	56716749	-	ENST00000520645	ENSG00000151914	DST	protein_coding	2425	3.87881	NA	NA	2400	8.64822	NA	NA	2450	0.717651
chr4	71570141	71610141	+	ENST00000503876	ENSG00000018189	RUFY3	protein_coding	2300	1.90533	NA	NA	NA	NA	1650	1.33468	NA	NA
chr5	52083730	52123730	+	ENST00000282588	ENSG00000213949	ITGA1	protein_coding	2300	1.31378	1825	4.36741	2375	0.870098	NA	NA	NA	NA
chr14	105766900	105806900	+	ENST00000430725	ENSG00000179364	PACS2	protein_coding	2275	0.548284	NA	NA	NA	NA	NA	NA	NA	NA
chr1	41157320	41197320	+	ENST00000467203	ENSG00000066136	NFYC	protein_coding	2200	0.773894	875	0.504681	NA	NA	2225	1.81918	NA	NA
chr10	128593978	128633978	+	ENST00000280333	ENSG00000150760	DOCK1	protein_coding	2200	2.08328	2200	0.612319	1750	1.02051	NA	NA	2200	1.22619
chr1	155590036	155630036	-	ENST00000500626	ENSG00000246203	RP11-29H23.5	pseudogene	2075	0.760319	NA	NA	NA	NA	NA	NA	NA	NA
chr10	45415137	45455137	-	ENST00000450287	ENSG00000224812	TMEM72-AS1	lincRNA	2075	0.692256	NA	NA	NA	NA	NA	NA	NA	NA
chr12	56181330	56221330	-	ENST00000546837	ENSG00000257390	RP11-762I7.5	protein_coding	2075	1.57356	NA	NA	2700	1.38761	NA	NA	1975	1.5794
chr17	42161014	42201014	-	ENST00000393622	ENSG00000108840	HDAC5	protein_coding	2075	1.61954	NA	NA	NA	NA	NA	NA	NA	NA
chr3	195595955	195635955	-	ENST00000333602	ENSG00000061938	TNK2	protein_coding	2075	0.610253	NA	NA	NA	NA	NA	NA	1275	0.649475
chr2	85198216	85238216	+	ENST00000409785	ENSG00000176407	KCMF1	protein_coding	2050	4.18678	1950	1.94685	2100	4.04416	2100	1.67559	2125	1.84894
chr4	80846251	80886251	-	ENST00000491345	ENSG00000163297	ANTXR2	protein_coding	2050	1.80062	NA	NA	NA	NA	NA	NA	NA	NA
chr14	77747227	77787227	-	ENST00000261534	ENSG00000009830	POMT2	protein_coding	2025	0.515619	NA	NA	NA	NA	NA	NA	1675	1.26284
chr4	15471489	15511489	+	ENST00000413206	ENSG00000048342	CC2D2A	protein_coding	2025	0.516022	NA	NA	NA	NA	NA	NA	NA	NA
chr4	148538537	148578537	+	ENST00000508208	ENSG00000164168	TMEM184C	protein_coding	2025	0.7288	2050	1.01091	1975	0.941835	2025	0.870752	2025	1.4869
chr12	2986389	3026389	+	ENST00000535226	ENSG00000078246	TULP3	protein_coding	1975	1.32405	NA	NA	2150	1.08611	1250	0.870192	1925	0.77372
chr13	24144509	24184509	+	ENST00000248484	ENSG00000127863	TNFRSF19	protein_coding	1950	1.08061	1475	2.41117	NA	NA	NA	NA	NA	NA
chr2	29336862	29376862	+	ENST00000402240	ENSG00000115295	CLIP4	protein_coding	1950	1.23927	1500	1.05946	1800	2.09912	NA	NA	NA	NA
chr1	214776538	214816538	+	ENST00000366955	ENSG00000117724	CENPF	protein_coding	1925	2.22579	1500	0.708533	2400	2.0898	250	3.80587	2000	0.928616
chr12	104680460	104720460	+	ENST00000503506	ENSG00000198431	TXNRD1	protein_coding	1925	13.7849	2050	5.95548	2100	8.69717	1025	2.29906	2125	2.66815
chr20	1246960	1286960	+	ENST00000381873	ENSG00000101298	SNPH	protein_coding	1925	0.921392	650	0.588985	NA	NA	NA	NA	NA	NA
chr6	111804744	111844744	+	ENST00000438298	ENSG00000231889	TRAF3IP2-AS1	lincRNA	1925	0.838822	NA	NA	NA	NA	NA	NA	NA	NA
chr8	11653082	11693082	+	ENST00000538689	ENSG00000079459	FDFT1	protein_coding	1925	2.01853	NA	NA	NA	NA	NA	NA	NA	NA
chrX	24167762	24207762	+	ENST00000539115	ENSG00000005889	ZFX	protein_coding	1925	2.04764	NA	NA	1925	4.27566	NA	NA	NA	NA
chr13	42614176	42654176	+	ENST00000540693	ENSG00000102780	DGKH	protein_coding	1900	0.936453	1900	0.60949	2450	0.660117	NA	NA	2425	1.27953
chr16	73053597	73093597	-	ENST00000397992	ENSG00000140836	ZFHX3	protein_coding	1900	2.28239	1900	0.891473	2050	1.35712	NA	NA	2300	1.0449
chr5	52285156	52325156	+	ENST00000296585	ENSG00000164171	ITGA2	protein_coding	1900	2.34529	1875	7.06529	1900	5.99178	NA	NA	2000	1.51755
chr10	31607424	31647424	+	ENST00000488625	ENSG00000148516	ZEB1	protein_coding	1875	2.21952	NA	NA	NA	NA	1900	0.728006	NA	NA
chr13	30384821	30424821	-	ENST00000380680	ENSG00000122042	UBL3	protein_coding	1875	3.79595	1850	5.13452	2050	7.28189	NA	NA	2100	6.78862
chr5	148891007	148931007	-	ENST00000377843	ENSG00000113712	CSNK1A1	protein_coding	1875	5.80823	1875	4.5445	1875	6.27746	825	2.59029	1875	3.178
chr6	47445525	47485525	+	ENST00000359314	ENSG00000198087	CD2AP	protein_coding	1875	0.919352	1850	1.38166	1900	1.7756	1900	2.2789	1925	1.07533
chr6	53369927	53409927	-	ENST00000229416	ENSG00000001084	GCLC	protein_coding	1875	0.540515	NA	NA	NA	NA	NA	NA	NA	NA
chr1	23345941	23385941	+	ENST00000356634	ENSG00000004487	KDM1A	protein_coding	1850	1.17542	1850	1.11825	2025	2.16743	1975	1.64312	2175	1.44032
chr1	67390578	67430578	+	ENST00000355977	ENSG00000198160	MIER1	protein_coding	1850	3.33446	2025	1.66718	2100	5.53239	1950	3.06023	2100	1.23983
chr1	206809073	206849073	+	ENST00000489878	ENSG00000143479	DYRK3	protein_coding	1850	3.02901	1900	1.2802	1850	2.00017	1950	1.54166	NA	NA
chr12	114806247	114846247	-	ENST00000310346	ENSG00000089225	TBX5	protein_coding	1850	5.3826	NA	NA	NA	NA	NA	NA	NA	NA
chr15	73886475	73926475	-	ENST00000351217	ENSG00000156642	NPTN	protein_coding	1850	1.96998	1850	2.60118	1975	2.49112	1900	1.04918	1975	2.19746
chr4	108512960	108552960	-	ENST00000514815	ENSG00000138801	PAPSS1	protein_coding	1850	1.11658	1875	1.65551	NA	NA	NA	NA	NA	NA
chr4	114643083	114683083	-	ENST00000454265	ENSG00000145349	CAMK2D	protein_coding	1850	3.4466	1750	4.67057	1775	8.22786	NA	NA	1500	0.7915
chr4	120510146	120550146	-	ENST00000354960	ENSG00000138735	PDE5A	protein_coding	1850	1.45446	NA	NA	1850	1.65691	NA	NA	NA	NA
chr6	108239393	108279393	-	ENST00000369002	ENSG00000025796	SEC63	protein_coding	1850	2.54241	1850	1.14749	1900	2.59436	1850	1.4868	2075	1.32393
chr1	246729746	246769746	+	ENST00000483271	ENSG00000162852	CNST	protein_coding	1825	2.4052	1825	2.63172	1825	4.05342	1825	2.24727	1900	0.873421
chr10	1095478	1135478	+	ENST00000358220	ENSG00000047056	WDR37	protein_coding	1825	1.40995	NA	NA	NA	NA	75	0.549573	1825	0.831969
chr10	86088342	86128342	+	ENST00000359979	ENSG00000107771	FAM190B	protein_coding	1825	1.93462	1725	1.11858	1750	1.89608	1675	0.656633	1825	0.878984
chr11	66886740	66926740	+	ENST00000398645	ENSG00000173120	KDM2A	protein_coding	1825	1.24354	1075	1.06275	1875	1.8073	1025	1.09523	2050	1.81469
chr13	41885341	41925341	+	ENST00000379367	ENSG00000172766	NAA16	protein_coding	1825	1.12119	1600	0.541884	1950	1.60369	1200	0.723807	2275	1.60045
chr14	73525144	73565144	+	ENST00000261973	ENSG00000119707	RBM25	protein_coding	1825	1.88292	1225	0.91875	1950	2.42087	1175	0.969135	2150	3.57626
chr15	80351910	80391910	+	ENST00000261749	ENSG00000086666	ZFAND6	protein_coding	1825	2.09927	1825	1.17938	1925	3.02269	1925	2.95485	1925	1.83574
chr2	215634428	215674428	-	ENST00000260947	ENSG00000138376	BARD1	protein_coding	1825	3.0695	525	0.567066	1925	2.65462	1675	1.25169	2000	1.81436
chr21	38739236	38779236	+	ENST00000462274	ENSG00000157540	DYRK1A	protein_coding	1825	4.9707	1850	2.4174	2100	3.92305	2175	4.9547	2050	2.90955
chr22	36744063	36784063	-	ENST00000216181	ENSG00000100345	MYH9	protein_coding	1825	12.2264	1350	15.1354	NA	NA	1175	0.728005	NA	NA
chr8	125344933	125384933	-	ENST00000297632	ENSG00000164983	TMEM65	protein_coding	1825	1.17681	NA	NA	1900	0.684971	1025	0.763692	2000	3.17102
chr1	165796768	165836768	+	ENST00000367879	ENSG00000143179	UCK2	protein_coding	1800	3.0593	1825	1.33189	2025	2.33796	1625	1.18479	2025	2.02882
chr10	43633934	43673934	+	ENST00000374466	ENSG00000169826	CSGALNACT2	protein_coding	1800	2.26922	1425	1.12742	1600	2.20889	975	0.562028	1800	0.750158
chr15	83836770	83876770	-	ENST00000299633	ENSG00000166503	RP11-382A20.3	protein_coding	1800	1.5412	NA	NA	1950	1.82622	1950	1.02064	1950	2.42402
chr2	64331588	64371588	-	ENST00000358912	ENSG00000197329	PELI1	protein_coding	1800	0.587082	NA	NA	1800	0.809487	1725	0.949262	NA	NA
chr2	162164549	162204549	+	ENST00000409682	ENSG00000115233	PSMD14	protein_coding	1800	1.79177	1450	1.31949	1950	2.50985	2000	2.40541	2075	2.05162
chr4	129730779	129770779	+	ENST00000226319	ENSG00000077684	PHF17	protein_coding	1800	1.1182	NA	NA	NA	NA	NA	NA	NA	NA
chr5	178732431	178772431	-	ENST00000251582	ENSG00000087116	ADAMTS2	protein_coding	1800	2.81943	NA	NA	1750	0.763004	NA	NA	NA	NA
chr6	37787275	37827275	+	ENST00000287218	ENSG00000156639	ZFAND3	protein_coding	1800	2.80859	1325	1.89137	1975	3.51811	1800	5.18645	1975	2.55907
chr6	137073656	137113656	-	ENST00000359015	ENSG00000197442	MAP3K5	protein_coding	1800	1.49686	NA	NA	1800	1.45583	1300	1.16688	1825	0.762157
chr8	54792444	54832444	+	ENST00000518286	ENSG00000147509	RGS20	protein_coding	1800	0.540489	NA	NA	1925	0.922054	NA	NA	NA	NA
chr8	61429416	61469416	+	ENST00000262646	ENSG00000104388	RAB2A	protein_coding	1800	5.88896	1700	2.99097	NA	NA	1850	1.23573	NA	NA
chr9	18473892	18513892	+	ENST00000380548	ENSG00000178031	ADAMTSL1	protein_coding	1800	1.82425	1600	2.32951	1850	9.88604	NA	NA	NA	NA
chr1	25071848	25111848	+	ENST00000374379	ENSG00000169504	CLIC4	protein_coding	1775	4.63232	2050	5.21936	2050	5.94817	1775	2.37337	2025	1.14296
chr1	180952047	180992047	-	ENST00000258301	ENSG00000135823	STX6	protein_coding	1775	1.36154	1300	0.923645	2025	1.48625	950	0.595336	2050	4.2073
chr11	12132138	12172138	+	ENST00000256194	ENSG00000133816	MICAL2	protein_coding	1775	6.74099	1900	6.46217	1700	2.54249	1100	0.717509	NA	NA
chr11	35160417	35200417	+	ENST00000263398	ENSG00000026508	CD44	protein_coding	1775	33.9504	1775	10.5621	2100	16.1667	NA	NA	1775	0.518903
chr11	61583728	61623728	+	ENST00000257261	ENSG00000134824	FADS2	protein_coding	1775	0.658558	NA	NA	2450	0.56931	1050	1.2633	NA	NA
chr12	54379629	54419629	+	ENST00000513209	ENSG00000172789	HOXC5	protein_coding	1775	0.854223	NA	NA	NA	NA	NA	NA	NA	NA
chr12	66217911	66257911	+	ENST00000403681	ENSG00000149948	HMGA2	protein_coding	1775	19.6447	NA	NA	1950	16.4916	NA	NA	NA	NA
chr12	100496626	100536626	-	ENST00000279907	ENSG00000111647	UHRF1BP1L	protein_coding	1775	1.62948	1600	0.984207	2100	2.30748	1900	0.592397	2575	0.901236
chr13	47127303	47167303	+	ENST00000311191	ENSG00000136141	LRCH1	protein_coding	1775	1.73718	1125	0.559098	1850	1.17529	1575	0.748158	1775	2.40886
chr14	75603334	75643334	-	ENST00000303575	ENSG00000170348	TMED10	protein_coding	1775	1.70978	1775	0.714136	1775	1.39344	1175	0.909797	1775	3.03347
chr17	73361790	73401790	-	ENST00000316615	ENSG00000177885	GRB2	protein_coding	1775	1.75603	1800	0.703421	2200	1.65969	1700	1.58952	2025	3.67498
chr18	46947717	46987717	-	ENST00000583353	ENSG00000141627	DYM	protein_coding	1775	0.765256	NA	NA	1825	0.815717	NA	NA	1825	0.623077
chr18	74534563	74574563	+	ENST00000320610	ENSG00000130856	ZNF236	protein_coding	1775	0.846503	NA	NA	NA	NA	NA	NA	NA	NA
chr2	173940163	173980163	+	ENST00000539448	ENSG00000091436	AC013461.1	protein_coding	1775	2.34366	NA	NA	1775	1.86364	1775	1.27912	NA	NA
chr2	225867162	225907162	-	ENST00000435582	ENSG00000135905	DOCK10	protein_coding	1775	5.00137	1225	3.51947	1900	5.63928	NA	NA	NA	NA
chr3	43623560	43663560	-	ENST00000292246	ENSG00000160746	ANO10	protein_coding	1775	0.635904	1725	0.70625	1775	0.854767	1425	0.857037	NA	NA
chr4	102229435	102269435	-	ENST00000529324	ENSG00000138814	PPP3CA	protein_coding	1775	1.7068	1425	1.50817	1850	1.3011	NA	NA	2375	2.92471
chr4	129974764	130014764	-	ENST00000434680	ENSG00000151466	SCLT1	protein_coding	1775	0.900223	NA	NA	1900	1.02843	1500	1.04974	2125	0.606824
chr6	18225054	18265054	-	ENST00000397239	ENSG00000124795	DEK	protein_coding	1775	3.55421	1675	2.12207	1950	5.17826	1675	6.69424	2175	1.87261
chr6	75875767	75915767	-	ENST00000322507	ENSG00000111799	COL12A1	protein_coding	1775	6.32067	2300	18.8845	2225	3.65401	NA	NA	NA	NA
chr7	27778992	27818992	+	ENST00000543117	ENSG00000106052	TAX1BP1	protein_coding	1775	1.76912	1400	1.18719	2050	2.20842	1825	1.59512	1975	1.80389
chr7	79763814	79803814	+	ENST00000490206	ENSG00000127955	GNAI1	protein_coding	1775	4.91384	1900	0.823323	1800	2.16296	NA	NA	NA	NA
chr7	132726848	132766848	-	ENST00000457942	ENSG00000106554	CHCHD3	protein_coding	1775	1.19499	NA	NA	1625	1.3747	1100	1.50541	2050	1.362
chr7	152093090	152133090	-	ENST00000262189	ENSG00000055609	MLL3	protein_coding	1775	1.34889	1650	0.683025	2150	1.59094	1800	2.24826	2525	2.81498
chr8	38199790	38239790	-	ENST00000316985	ENSG00000147548	WHSC1L1	protein_coding	1775	0.86237	1375	0.690096	1800	1.96188	1400	0.926871	1800	1.21561
chr8	41869505	41909505	-	ENST00000396930	ENSG00000083168	KAT6A	protein_coding	1775	2.05965	1525	1.12742	1875	2.76976	1775	1.95394	1950	1.79135
chrX	123094062	123134062	+	ENST00000394477	ENSG00000101972	STAG2	protein_coding	1775	1.39869	1100	0.827865	2200	2.03004	1325	2.03092	2300	1.61834
chr1	65713902	65753902	+	ENST00000463018	ENSG00000116675	DNAJC6	protein_coding	1750	2.21113	NA	NA	2600	0.786991	NA	NA	NA	NA
chr1	240255180	240295180	+	ENST00000319653	ENSG00000155816	FMN2	protein_coding	1750	4.49321	1325	3.08297	1925	9.71944	NA	NA	NA	NA
chr10	91461367	91501367	+	ENST00000394289	ENSG00000138182	KIF20B	protein_coding	1750	1.38201	NA	NA	1900	2.54265	1825	1.55384	1850	1.04773
chr10	94353043	94393043	+	ENST00000260731	ENSG00000138160	KIF11	protein_coding	1750	1.60317	NA	NA	1750	2.40694	1650	2.16527	1750	1.37803
chr11	9406169	9446169	+	ENST00000379719	ENSG00000205339	IPO7	protein_coding	1750	1.95697	1750	1.40679	1750	2.92154	1700	1.31173	2350	1.26295
chr11	13298199	13338199	+	ENST00000529050	ENSG00000133794	ARNTL	protein_coding	1750	0.827476	NA	NA	NA	NA	NA	NA	NA	NA
chr11	85740924	85780924	-	ENST00000528398	ENSG00000073921	PICALM	protein_coding	1750	4.737	1825	6.25864	1975	5.94928	1975	9.58906	2075	3.06979
chr12	76913589	76953589	-	ENST00000261183	ENSG00000091039	OSBPL8	protein_coding	1750	2.109	1750	1.44519	1750	2.42347	1650	1.56307	1750	1.06213
chr12	106493811	106533811	-	ENST00000261402	ENSG00000074590	NUAK1	protein_coding	1750	1.49547	1925	3.45535	2000	0.513728	NA	NA	NA	NA
chr12	118770750	118810750	-	ENST00000392533	ENSG00000135090	TAOK3	protein_coding	1750	1.32033	1775	1.11433	1975	1.89524	1925	1.12266	1975	0.856731
chr14	50959327	50999327	-	ENST00000013125	ENSG00000012983	MAP4K5	protein_coding	1750	2.59995	1450	2.58685	2200	5.03341	1150	0.658452	2175	1.60907
chr14	102430865	102470865	+	ENST00000360184	ENSG00000197102	DYNC1H1	protein_coding	1750	2.7945	1650	3.35731	1775	4.6711	1650	1.9177	1775	5.68842
chr15	77672486	77712486	-	ENST00000560626	ENSG00000173517	PEAK1	protein_coding	1750	2.00486	2000	2.53412	2000	3.22382	1925	1.02064	1925	0.639766
chr17	29421945	29461945	+	ENST00000358273	ENSG00000196712	NF1	protein_coding	1750	1.67699	1450	0.883832	NA	NA	1050	1.73409	NA	NA
chr17	80477589	80517589	+	ENST00000473637	ENSG00000141568	FOXK2	protein_coding	1750	2.06526	1725	0.54444	1800	1.48573	1775	1.12993	1925	2.16659
chr18	43753988	43793988	+	ENST00000282059	ENSG00000152242	C18orf25	protein_coding	1750	1.21275	1225	0.785549	1825	1.04733	1225	0.500591	1825	1.0329
chr2	28974614	29014614	+	ENST00000358506	ENSG00000213639	PPP1CB	protein_coding	1750	2.7675	1625	1.76342	NA	NA	1825	1.39891	1825	2.00384
chr2	36583069	36623069	+	ENST00000280527	ENSG00000150938	CRIM1	protein_coding	1750	20.1196	2025	27.6048	2075	23.5044	NA	NA	2425	1.22467
chr2	65317240	65357240	-	ENST00000409784	ENSG00000138069	RAB1A	protein_coding	1750	2.88987	1750	2.73221	NA	NA	1675	1.39891	1775	1.90796
chr21	33064431	33104431	-	ENST00000434667	ENSG00000156304	SCAF4	protein_coding	1750	2.42366	1725	1.31212	NA	NA	1925	2.84331	2150	1.30735
chr4	170152256	170192256	-	ENST00000284637	ENSG00000154447	SH3RF1	protein_coding	1750	4.52808	NA	NA	NA	NA	NA	NA	NA	NA
chr5	95257775	95297775	-	ENST00000237853	ENSG00000118985	ELL2	protein_coding	1750	7.58168	1925	13.5326	1925	7.24898	NA	NA	NA	NA
chr6	158402888	158442888	+	ENST00000367121	ENSG00000078269	SYNJ2	protein_coding	1750	4.35048	1875	1.75349	1750	2.50066	NA	NA	1750	0.539629
chr8	38758753	38798753	+	ENST00000420274	ENSG00000169499	PLEKHA2	protein_coding	1750	3.81053	1450	1.08902	1775	2.14182	NA	NA	NA	NA
chr8	54895089	54935089	-	ENST00000521604	ENSG00000187735	TCEA1	protein_coding	1750	1.53989	1425	0.734804	2000	2.33251	1325	6.21297	2275	1.97177
chr9	36447545	36487545	-	ENST00000488058	ENSG00000137075	RNF38	protein_coding	1750	0.957873	1125	0.640601	1775	0.946552	NA	NA	NA	NA
chr1	171671387	171711387	-	ENST00000236192	ENSG00000117533	VAMP4	protein_coding	1725	0.951815	1375	0.709486	1775	1.62634	1025	0.835485	NA	NA
chr1	225800844	225840844	-	ENST00000366844	ENSG00000154380	ENAH	protein_coding	1725	1.68481	1700	4.15118	1875	2.7183	NA	NA	1975	2.81159
chr1	247202113	247242113	-	ENST00000474541	ENSG00000135747	ZNF670	protein_coding	1725	0.926391	NA	NA	2050	0.849872	1500	1.09187	1450	0.745467
chr12	65672423	65712423	+	ENST00000308259	ENSG00000174099	MSRB3	protein_coding	1725	3.78011	1375	3.12838	1750	2.7711	NA	NA	NA	NA
chr12	72666463	72706463	+	ENST00000261180	ENSG00000072657	TRHDE	protein_coding	1725	2.42332	1525	0.857262	2100	1.72061	NA	NA	NA	NA
chr13	111325950	111365950	-	ENST00000535398	ENSG00000134905	CARS2	protein_coding	1725	2.40177	NA	NA	NA	NA	NA	NA	NA	NA
chr13	114527046	114567046	-	ENST00000357389	ENSG00000183087	GAS6	protein_coding	1725	6.41938	1775	12.2602	1525	2.60451	NA	NA	NA	NA
chr15	65134082	65174082	+	ENST00000502574	ENSG00000249240	AC069368.3	protein_coding	1725	2.44616	1250	0.698526	1750	1.14421	NA	NA	NA	NA
chr15	85923818	85963818	+	ENST00000559362	ENSG00000170776	AKAP13	protein_coding	1725	2.36567	1650	1.69957	1875	2.48878	NA	NA	1800	1.14045
chr17	40129715	40169715	-	ENST00000457167	ENSG00000168259	DNAJC7	protein_coding	1725	2.1727	825	0.906838	1725	1.81142	NA	NA	1725	0.773283
chr2	9731143	9771143	-	ENST00000238081	ENSG00000134308	YWHAQ	protein_coding	1725	6.39017	1900	4.02497	1900	8.77732	1275	2.03875	2125	2.77167
chr2	37153615	37193615	-	ENST00000263918	ENSG00000115808	STRN	protein_coding	1725	1.08886	1700	0.582622	1900	1.61136	1725	1.35259	1800	0.734341
chr2	190004605	190044605	-	ENST00000374866	ENSG00000204262	COL5A2	protein_coding	1725	5.58872	1500	4.34046	1875	4.99663	NA	NA	NA	NA
chr2	191745553	191785553	+	ENST00000320717	ENSG00000115419	GLS	protein_coding	1725	8.63025	1775	59.0619	NA	NA	1775	1.79762	NA	NA
chr2	191838976	191878976	-	ENST00000361099	ENSG00000115415	STAT1	protein_coding	1725	3.56508	1750	3.83213	1725	2.08682	1750	0.90336	1750	1.52181
chr2	231577560	231617560	+	ENST00000258418	ENSG00000135932	CAB39	protein_coding	1725	6.106	1450	1.20492	1850	3.34809	1150	2.22082	2150	1.40749
chr22	36384473	36424473	-	ENST00000438146	ENSG00000100320	RBFOX2	protein_coding	1725	1.90643	1375	0.844698	1875	2.38066	1800	0.699456	2275	0.689836
chr22	46067678	46107678	+	ENST00000381061	ENSG00000130638	ATXN10	protein_coding	1725	5.38929	1600	1.55508	1775	4.41613	1425	0.619406	1800	1.50479
chr3	30647994	30687994	+	ENST00000295754	ENSG00000163513	TGFBR2	protein_coding	1725	3.10549	1600	2.32603	1600	4.76707	NA	NA	1700	0.600824
chr3	33318517	33358517	+	ENST00000498807	ENSG00000153558	FBXL2	protein_coding	1725	0.552868	NA	NA	2125	0.53896	NA	NA	NA	NA
chr3	160127617	160167617	-	ENST00000483754	ENSG00000248710	RP11-432B6.3	protein_coding	1725	2.57246	1675	1.18928	1900	2.80775	1425	3.15358	1900	1.66296
chr3	192595950	192635950	-	ENST00000392452	ENSG00000180611	MB21D2	protein_coding	1725	5.71638	825	0.645034	1725	4.51352	NA	NA	1600	1.3416
chr4	3076408	3116408	+	ENST00000355072	ENSG00000197386	HTT	protein_coding	1725	1.08624	1475	0.636331	1925	1.12155	1300	0.720868	1925	0.962432
chr4	106067032	106107032	+	ENST00000305737	ENSG00000168769	TET2	protein_coding	1725	1.11517	1000	0.537369	1725	1.16274	1675	0.792242	2050	1.97493
chr5	14143811	14183811	+	ENST00000502816	ENSG00000038382	TRIO	protein_coding	1725	9.39251	1375	9.07023	2075	10.329	NA	NA	1725	1.38523
chr5	132387654	132427654	+	ENST00000304858	ENSG00000170606	HSPA4	protein_coding	1725	1.79341	1500	1.12445	1850	2.49288	1475	1.45027	2050	2.81781
chr6	34320451	34360451	-	ENST00000358797	ENSG00000112664	NUDT3	protein_coding	1725	1.15964	1225	0.782014	1925	1.55389	1850	2.06254	1925	0.967995
chr6	101289248	101329248	-	ENST00000324696	ENSG00000112249	ASCC3	protein_coding	1725	3.10274	1475	1.46825	1875	2.87152	1400	0.869912	1750	1.5998
chr6	117803820	117843820	+	ENST00000368503	ENSG00000164465	DCBLD1	protein_coding	1725	3.17959	1225	1.42827	1725	1.66599	NA	NA	NA	NA
chr6	161412759	161452759	+	ENST00000366919	ENSG00000085511	MAP3K4	protein_coding	1725	0.875366	1700	1.25858	NA	NA	1575	1.46469	NA	NA
chr6	168227602	168267602	+	ENST00000400825	ENSG00000130396	MLLT4	protein_coding	1725	0.96529	NA	NA	1775	0.673556	2150	2.44782	1675	0.921417
chr7	129710350	129750350	+	ENST00000335420	ENSG00000128607	KLHDC10	protein_coding	1725	1.07049	1625	0.70527	1725	1.51985	625	2.36245	1775	1.06224
chr8	11141925	11181925	+	ENST00000221086	ENSG00000104643	MTMR9	protein_coding	1725	1.61804	1000	0.737034	1675	1.57707	1475	1.01294	2150	0.690162
chr1	36396319	36436319	+	ENST00000324350	ENSG00000126070	EIF2C3	protein_coding	1700	1.14023	NA	NA	1750	1.36514	1750	0.970814	1650	0.579226
chr1	213224589	213264589	+	ENST00000543470	ENSG00000136643	RPS6KC1	protein_coding	1700	0.786562	1300	0.625427	1700	1.37132	1700	2.48337	NA	NA
chr1	243378650	243418650	-	ENST00000522995	ENSG00000143702	CEP170	protein_coding	1700	2.36067	NA	NA	NA	NA	1775	2.94645	NA	NA
chr12	45609770	45649770	+	ENST00000426898	ENSG00000177119	ANO6	protein_coding	1700	3.25618	1475	1.64058	2025	2.37038	1825	1.12937	1975	2.2088
chr13	97873688	97913688	+	ENST00000397601	ENSG00000139793	MBNL2	protein_coding	1700	4.74326	1425	1.53928	1875	4.5469	1700	3.44522	1825	2.87584
chr16	84733584	84773584	+	ENST00000219473	ENSG00000103194	USP10	protein_coding	1700	2.5379	1725	0.969169	NA	NA	1850	2.6082	1850	2.40046
chr2	64206567	64246567	-	ENST00000483277	ENSG00000143952	VPS54	protein_coding	1700	1.30747	1400	0.722621	1875	1.49953	1725	1.27044	1800	0.727578
chr2	169312372	169352372	+	ENST00000305747	ENSG00000172292	CERS6	protein_coding	1700	0.888563	NA	NA	1775	0.517199	1425	0.558809	2150	1.63405
chr2	198259815	198299815	-	ENST00000335508	ENSG00000115524	SF3B1	protein_coding	1700	2.30418	1675	2.7145	1900	3.77559	1850	3.10459	1900	3.39627
chr2	235860617	235900617	+	ENST00000392011	ENSG00000130147	SH3BP4	protein_coding	1700	12.1942	1925	5.04986	NA	NA	NA	NA	1650	0.650893
chr20	48290415	48330415	-	ENST00000371711	ENSG00000158470	B4GALT5	protein_coding	1700	1.23641	1350	1.07324	1825	2.38356	1750	1.58434	1750	0.589698
chr22	30279144	30319144	+	ENST00000401950	ENSG00000100330	MTMR3	protein_coding	1700	0.940608	1750	0.859791	1925	1.07256	1075	0.578122	2100	0.706525
chr3	172389008	172429008	-	ENST00000538775	ENSG00000144959	NCEH1	protein_coding	1700	3.66547	1725	1.00662	1850	2.8589	NA	NA	NA	NA
chr4	54192242	54232242	-	ENST00000401642	ENSG00000184178	SCFD2	protein_coding	1700	0.825977	1950	2.18576	1950	3.18628	NA	NA	NA	NA
chr4	123747863	123787863	+	ENST00000264498	ENSG00000138685	FGF2	protein_coding	1700	14.2809	1700	22.5651	1850	16.9362	1450	1.55593	NA	NA
chr5	56111401	56151401	+	ENST00000399503	ENSG00000095015	MAP3K1	protein_coding	1700	1.02356	1600	1.49819	1600	0.714787	1325	0.806516	2375	5.58043
chr5	72921983	72961983	+	ENST00000296794	ENSG00000214944	RP11-428C6.1	protein_coding	1700	1.35662	NA	NA	1975	1.87343	NA	NA	1725	0.723214
chr6	18387581	18427581	+	ENST00000259939	ENSG00000137393	RNF144B	protein_coding	1700	0.63841	NA	NA	2025	1.03909	NA	NA	1775	0.701289
chr6	87865267	87905267	+	ENST00000369577	ENSG00000188994	ZNF292	protein_coding	1700	2.71351	1700	1.13465	1975	3.10905	1800	1.3726	2350	3.05976
chr6	118933710	118973710	-	ENST00000483035	ENSG00000111860	CEP85L	protein_coding	1700	1.19257	1900	2.68606	1900	1.48787	NA	NA	NA	NA
chr6	129991370	130031370	-	ENST00000275189	ENSG00000146376	ARHGAP18	protein_coding	1700	3.21184	1450	1.40842	1825	4.5313	1100	1.14659	NA	NA
chr7	148541413	148581413	-	ENST00000483012	ENSG00000106462	EZH2	protein_coding	1700	1.36509	NA	NA	2100	2.05077	1700	5.32836	2275	2.11314
chr8	101282555	101322555	-	ENST00000341084	ENSG00000034677	RNF19A	protein_coding	1700	2.45081	1375	1.79888	1775	3.08117	1725	1.81918	1925	4.59138
chr8	142138720	142178720	+	ENST00000424248	ENSG00000105339	DENND3	protein_coding	1700	5.8021	NA	NA	NA	NA	NA	NA	NA	NA
chr9	6413151	6453151	+	ENST00000468435	ENSG00000147854	UHRF2	protein_coding	1700	2.21893	1375	1.29785	2100	3.12963	1375	0.705894	2150	0.873421
chr9	21519668	21559668	-	ENST00000304425	ENSG00000171889	MIR31HG	lincRNA	1700	3.22794	1650	5.32273	1700	7.19562	NA	NA	NA	NA
chr9	36036430	36076430	+	ENST00000377966	ENSG00000122707	RECK	protein_coding	1700	2.46953	1975	15.7544	1925	4.17135	NA	NA	NA	NA
chr9	129089128	129129128	+	ENST00000361171	ENSG00000196814	FAM125B	protein_coding	1700	0.900236	NA	NA	NA	NA	NA	NA	NA	NA
chrX	24005303	24045303	-	ENST00000328046	ENSG00000174010	KLHL15	protein_coding	1700	0.769461	NA	NA	NA	NA	1350	0.699456	NA	NA
chr1	27776669	27816669	-	ENST00000430629	ENSG00000158195	WASF2	protein_coding	1675	2.86683	1525	1.48973	1875	3.05555	1200	2.26211	1875	1.02265
chr1	63113969	63153969	-	ENST00000251157	ENSG00000116641	DOCK7	protein_coding	1675	1.37877	1250	0.745628	1725	2.50044	NA	NA	NA	NA
chr1	66797687	66837687	+	ENST00000371045	ENSG00000184588	PDE4B	protein_coding	1675	7.47335	2400	5.30334	2025	1.9374	NA	NA	NA	NA
chr1	70631303	70671303	-	ENST00000370952	ENSG00000066557	LRRC40	protein_coding	1675	0.672926	NA	NA	1750	1.15542	1700	0.893144	NA	NA
chr1	114315098	114355098	-	ENST00000261441	ENSG00000081019	RSBN1	protein_coding	1675	0.899808	1525	0.795203	1850	1.35081	1675	2.10873	2050	3.93787
chr1	185014496	185054496	+	ENST00000367510	ENSG00000121481	RNF2	protein_coding	1675	1.05393	975	0.501146	1775	1.11633	1775	1.1277	1950	0.923489
chr1	227466175	227506175	-	ENST00000366769	ENSG00000143776	CDC42BPA	protein_coding	1675	1.68796	1325	1.31908	1775	2.32737	1675	5.78333	1675	1.77782
chr10	65281123	65321123	+	ENST00000373758	ENSG00000165476	REEP3	protein_coding	1675	1.38469	975	0.856664	1550	1.516	825	0.677764	1675	1.58813
chr10	76871229	76911229	+	ENST00000372690	ENSG00000156671	SAMD8	protein_coding	1675	1.07099	1450	0.591977	NA	NA	1525	0.806516	1875	0.561882
chr11	73882144	73922144	+	ENST00000328257	ENSG00000214517	PPME1	protein_coding	1675	0.772584	1700	2.98585	1775	1.2013	1775	0.777967	1775	0.893055
chr11	107879459	107919459	+	ENST00000393094	ENSG00000166266	CUL5	protein_coding	1675	2.92007	1625	1.06264	1800	2.73379	1775	1.93225	2125	1.44457
chr12	69864129	69904129	+	ENST00000299293	ENSG00000166225	FRS2	protein_coding	1675	2.72079	1475	2.29769	1900	4.60172	1250	1.09201	2000	7.21175
chr12	90063077	90103077	-	ENST00000551310	ENSG00000070961	ATP2B1	protein_coding	1675	4.81481	1800	1.43978	1925	2.00509	1825	2.21509	2125	4.24286
chr12	110394194	110434194	-	ENST00000338373	ENSG00000139436	GIT2	protein_coding	1675	1.12364	NA	NA	NA	NA	750	0.723387	1650	0.785392
chr13	29029265	29069265	-	ENST00000539099	ENSG00000102755	FLT1	protein_coding	1675	1.97978	NA	NA	NA	NA	NA	NA	NA	NA
chr13	60698119	60738119	-	ENST00000400330	ENSG00000139734	DIAPH3	protein_coding	1675	2.52815	NA	NA	1825	2.63648	1775	1.73437	1975	0.748194
chr13	73356197	73396197	+	ENST00000326291	ENSG00000083535	PIBF1	protein_coding	1675	0.575749	900	0.520672	1800	0.858016	1250	1.0748	NA	NA
chr13	96665736	96705736	-	ENST00000376714	ENSG00000102595	UGGT2	protein_coding	1675	0.787872	NA	NA	1850	0.82544	NA	NA	NA	NA
chr13	102104966	102144966	+	ENST00000376180	ENSG00000198542	ITGBL1	protein_coding	1675	0.753985	1600	6.45213	1950	3.4603	NA	NA	NA	NA
chr14	45682605	45722605	-	ENST00000310806	ENSG00000129534	MIS18BP1	protein_coding	1675	1.41044	NA	NA	NA	NA	1775	1.80826	2250	3.28239
chr14	65381203	65421203	+	ENST00000542227	ENSG00000125954	CHURC1-FNTB	protein_coding	1675	1.64937	1350	1.88939	1675	2.2628	1575	1.82813	1725	4.58047
chr14	103483799	103523799	-	ENST00000361246	ENSG00000198752	CDC42BPB	protein_coding	1675	2.15401	1575	0.905642	1925	1.97661	NA	NA	1900	1.63002
chr15	49298760	49338760	-	ENST00000559471	ENSG00000138593	SECISBP2L	protein_coding	1675	1.3381	1475	1.49683	1725	2.77522	1825	0.764952	2100	0.64642
chr15	59625099	59665099	-	ENST00000288235	ENSG00000157483	MYO1E	protein_coding	1675	1.86242	1350	2.46059	1925	2.53829	NA	NA	NA	NA
chr17	20907073	20947073	-	ENST00000579645	ENSG00000124422	USP22	protein_coding	1675	5.472	1575	1.89458	2075	4.63655	1550	2.05555	2100	3.81122
chr18	72265106	72305106	+	ENST00000582337	ENSG00000215421	ZNF407	protein_coding	1675	1.2069	NA	NA	1800	0.671086	NA	NA	1725	0.667583
chr2	26256976	26296976	+	ENST00000495146	ENSG00000084733	RAB10	protein_coding	1675	1.86196	1625	1.51094	1975	2.65922	1750	2.62527	1975	3.15084
chr2	39624453	39664453	-	ENST00000263881	ENSG00000011566	MAP4K3	protein_coding	1675	3.16062	1425	1.14109	1775	2.74157	1775	1.96962	1900	1.32077
chr2	65454887	65494887	+	ENST00000260641	ENSG00000138071	ACTR2	protein_coding	1675	2.29903	1625	3.16442	1700	4.20661	1700	3.71882	2225	1.94973
chr2	223725652	223765652	+	ENST00000357430	ENSG00000123983	ACSL3	protein_coding	1675	3.11581	1800	1.4931	1950	3.70183	1950	3.38547	1950	2.01933
chr2	229006361	229046361	-	ENST00000392056	ENSG00000153820	SPHKAP	protein_coding	1675	1.41001	NA	NA	NA	NA	NA	NA	NA	NA
chr20	33373452	33413452	-	ENST00000359003	ENSG00000198646	NCOA6	protein_coding	1675	1.27526	1350	1.03302	1700	1.95093	1025	0.949262	1975	1.42418
chr21	30671192	30711192	+	ENST00000286800	ENSG00000156273	BACH1	protein_coding	1675	5.78527	1675	2.19296	NA	NA	1800	2.26029	1600	0.895673
chr22	43371151	43411151	-	ENST00000263246	ENSG00000100266	PACSIN2	protein_coding	1675	1.9861	2075	0.613732	1850	1.27275	NA	NA	2475	0.595261
chr3	8965186	9005186	-	ENST00000264926	ENSG00000070950	RAD18	protein_coding	1675	1.05122	1575	0.591895	1800	2.18343	1500	0.994185	1650	0.962322
chr3	12665725	12705725	-	ENST00000251849	ENSG00000132155	RAF1	protein_coding	1675	2.24392	1450	1.34769	1675	3.06096	975	1.60897	2150	2.10616
chr3	135684515	135724515	+	ENST00000264977	ENSG00000073711	PPP2R3A	protein_coding	1675	2.70632	1325	1.05402	1625	2.16514	NA	NA	1550	0.600824
chr3	160243376	160283376	-	ENST00000334256	ENSG00000186432	KPNA4	protein_coding	1675	5.28357	1600	2.45303	1800	5.06427	1500	1.65376	1875	4.08895
chr3	196594727	196634727	+	ENST00000323460	ENSG00000119231	SENP5	protein_coding	1675	1.49494	1200	0.955109	1800	1.63548	1675	1.62031	1825	2.04725
chr4	1873151	1913151	+	ENST00000508803	ENSG00000109685	WHSC1	protein_coding	1675	3.07093	1675	0.820196	2025	3.1934	1675	2.22684	1675	1.17383
chr4	83781691	83821691	-	ENST00000355196	ENSG00000138674	SEC31A	protein_coding	1675	3.21387	2200	2.44843	NA	NA	750	3.49085	2600	2.14314
chr4	87515468	87555468	+	ENST00000427191	ENSG00000163629	PTPN13	protein_coding	1675	1.70793	NA	NA	1725	1.0977	NA	NA	1750	0.940179
chr4	99539780	99579780	-	ENST00000305798	ENSG00000168785	TSPAN5	protein_coding	1675	5.37049	2125	2.12345	1900	5.01307	NA	NA	2100	1.00366
chr5	52856463	52896463	+	ENST00000507026	ENSG00000164258	NDUFS4	protein_coding	1675	2.04853	1825	1.47366	1800	2.33449	1450	0.843742	1950	0.854004
chr5	108705695	108745695	-	ENST00000361189	ENSG00000198961	PJA2	protein_coding	1675	2.25064	1325	1.48209	NA	NA	2100	1.55593	2300	1.02363
chr6	3064092	3104092	+	ENST00000490396	ENSG00000137275	RIPK1	protein_coding	1675	3.17639	NA	NA	NA	NA	1775	1.26946	2050	1.30179
chr6	52886600	52926600	-	ENST00000356971	ENSG00000112144	ICK	protein_coding	1675	0.816344	825	0.687866	1650	0.866693	NA	NA	NA	NA
chr6	111764918	111804918	-	ENST00000422377	ENSG00000009413	REV3L	protein_coding	1675	3.55635	1650	2.16729	1775	5.23391	1675	1.86284	1775	3.29036
chr6	151186685	151226685	+	ENST00000367321	ENSG00000120254	MTHFD1L	protein_coding	1675	4.5636	1575	1.59655	1850	2.25176	1150	1.54964	1950	0.787246
chr6	154791793	154831793	-	ENST00000367213	ENSG00000153721	CNKSR3	protein_coding	1675	1.09988	NA	NA	1800	1.41611	1575	0.900701	NA	NA
chr6	158244281	158284281	+	ENST00000539592	ENSG00000130340	SNX9	protein_coding	1675	4.22197	1525	1.37217	2050	3.98052	1925	4.48028	1925	0.728778
chr7	104654626	104694626	+	ENST00000311117	ENSG00000005483	MLL5	protein_coding	1675	2.6416	1675	3.15525	1700	5.1207	1700	4.23075	2050	3.47885
chr7	131012605	131052605	+	ENST00000446815	ENSG00000128585	MKLN1	protein_coding	1675	2.32761	1700	2.322	1700	4.25815	1700	2.29108	2075	1.40607
chr7	140584564	140624564	-	ENST00000288602	ENSG00000157764	BRAF	protein_coding	1675	1.28004	1550	0.56141	1675	1.54254	1525	1.96262	2125	1.38523
chr8	68215912	68255912	-	ENST00000519436	ENSG00000066777	ARFGEF1	protein_coding	1675	1.66579	1675	1.44062	1950	2.46479	1250	1.39653	2200	1.80171
chr9	96214173	96254173	+	ENST00000375389	ENSG00000048828	FAM120A	protein_coding	1675	2.03588	1325	1.15355	2025	2.36551	1350	1.51451	1975	3.11004
chr9	114207025	114247025	-	ENST00000259335	ENSG00000136813	KIAA0368	protein_coding	1675	1.8021	1825	0.763902	1825	2.04757	1375	1.07172	2325	1.41305
chrX	54482599	54522599	-	ENST00000375135	ENSG00000102302	FGD1	protein_coding	1675	0.519925	NA	NA	NA	NA	NA	NA	NA	NA
chrX	117480036	117520036	+	ENST00000371822	ENSG00000131725	WDR44	protein_coding	1675	1.21877	1775	0.969903	2075	1.65971	1675	0.978931	NA	NA
chr1	16174359	16214359	+	ENST00000375759	ENSG00000065526	SPEN	protein_coding	1650	0.910273	1625	0.868657	2125	1.80101	1125	1.55397	2125	0.878984
chr1	86822025	86862025	-	ENST00000370566	ENSG00000122417	ODF2L	protein_coding	1650	1.26698	1425	0.854325	NA	NA	NA	NA	NA	NA
chr1	94107385	94147385	-	ENST00000260502	ENSG00000137936	BCAR3	protein_coding	1650	7.6008	1450	16.8979	2000	8.9468	NA	NA	1725	0.979121
chr1	109544850	109584850	-	ENST00000357672	ENSG00000085433	WDR47	protein_coding	1650	0.873691	1425	0.511616	1900	0.86903	NA	NA	1900	0.532757
chr1	113161795	113201795	+	ENST00000263168	ENSG00000116489	CAPZA1	protein_coding	1650	3.96938	1550	1.56909	1925	4.89165	1550	3.60113	1925	2.07562
chr10	121652223	121692223	+	ENST00000369075	ENSG00000107651	SEC23IP	protein_coding	1650	1.33744	1375	0.720989	1650	1.46144	1075	0.627804	1400	1.37967
chr11	9246937	9286937	-	ENST00000328194	ENSG00000184014	DENND5A	protein_coding	1650	1.69864	1500	0.941811	1775	1.82811	1150	0.820791	1875	0.550756
chr11	31391387	31431387	+	ENST00000529086	ENSG00000170946	DNAJC24	protein_coding	1650	0.833231	NA	NA	1650	0.83977	950	0.519624	NA	NA
chr11	116929153	116969153	-	ENST00000446921	ENSG00000160584	SIK3	protein_coding	1650	1.6909	1550	0.791315	1975	1.51166	1550	0.84934	1975	0.730741
chr11	129939732	129979732	+	ENST00000532456	ENSG00000084234	APLP2	protein_coding	1650	1.80567	1925	3.65553	1875	5.20203	1600	1.17052	1925	1.2239
chr12	31704031	31744031	-	ENST00000389082	ENSG00000170456	DENND5B	protein_coding	1650	0.876902	1150	1.08885	1875	0.939454	950	0.506749	NA	NA
chr12	107447607	107487607	-	ENST00000008527	ENSG00000008405	CRY1	protein_coding	1650	1.57423	NA	NA	1925	0.912197	1725	0.960458	2025	0.651329
chr13	34392206	34432206	+	ENST00000434425	ENSG00000133119	RFC3	protein_coding	1650	0.961197	NA	NA	1725	1.14076	1975	2.03022	1975	2.46635
chr13	98628886	98668886	+	ENST00000490680	ENSG00000065150	IPO5	protein_coding	1650	1.65449	1100	1.68728	NA	NA	1175	1.5285	1825	1.45668
chr14	35451163	35491163	+	ENST00000556994	ENSG00000100883	SRP54	protein_coding	1650	0.943076	1700	0.581725	1700	1.5441	1100	0.563848	1750	1.09497
chr15	40886218	40926218	+	ENST00000346991	ENSG00000137812	CASC5	protein_coding	1650	0.639077	NA	NA	NA	NA	1450	0.90462	NA	NA
chr15	71015932	71055932	-	ENST00000322954	ENSG00000137831	UACA	protein_coding	1650	4.07113	1400	2.9158	1650	6.98543	NA	NA	NA	NA
chr15	75831630	75871630	-	ENST00000306726	ENSG00000169410	PTPN9	protein_coding	1650	1.50623	1625	0.817775	1825	1.51457	1650	0.82359	1975	0.823353
chr16	24986987	25026987	-	ENST00000573449	ENSG00000140750	ARHGAP17	protein_coding	1650	3.15898	1175	0.755146	2200	3.23434	1175	0.613809	1800	0.528503
chr17	30264037	30304037	+	ENST00000322652	ENSG00000178691	SUZ12	protein_coding	1650	0.550223	NA	NA	1925	0.772394	NA	NA	NA	NA
chr18	9475007	9515007	+	ENST00000019317	ENSG00000017797	RALBP1	protein_coding	1650	1.324	1450	0.742419	1950	1.44206	1500	1.35273	2150	0.791609
chr18	18651812	18691812	-	ENST00000399799	ENSG00000067900	ROCK1	protein_coding	1650	3.26385	1925	2.19525	1925	4.43139	1525	0.971094	2025	1.64889
chr19	15403356	15443356	-	ENST00000360016	ENSG00000141867	BRD4	protein_coding	1650	6.53152	1650	1.66984	1900	3.51103	1575	2.86206	1900	3.5719
chr2	38790171	38830171	-	ENST00000409636	ENSG00000143889	HNRPLL	protein_coding	1650	2.28287	1750	1.54616	1875	3.19182	1775	13.795	1975	2.70437
chr2	48541776	48581776	+	ENST00000413569	ENSG00000170802	FOXN2	protein_coding	1650	2.23395	1825	0.81337	1975	3.05685	1925	1.89867	2100	0.868512
chr2	61108656	61148656	+	ENST00000295025	ENSG00000162924	REL	protein_coding	1650	0.733358	NA	NA	1750	0.711828	1575	0.948423	1900	3.46009
chr2	75873920	75913920	+	ENST00000358788	ENSG00000115364	MRPL19	protein_coding	1650	1.32711	2300	1.42085	1575	1.61793	1850	2.47665	1825	2.09274
chr2	135676395	135716395	+	ENST00000264157	ENSG00000082258	CCNT2	protein_coding	1650	2.99364	1725	1.74493	1750	4.03922	1675	2.32089	1650	2.94904
chr20	32951041	32991041	+	ENST00000374864	ENSG00000078747	ITCH	protein_coding	1650	1.5446	1450	1.4961	1775	2.79052	1150	1.13483	1825	1.70234
chr20	46130601	46170601	+	ENST00000341724	ENSG00000124151	NCOA3	protein_coding	1650	1.77655	1500	1.31084	1700	1.3699	1275	2.19116	1800	31.8167
chr22	21921836	21961836	+	ENST00000342192	ENSG00000185651	UBE2L3	protein_coding	1650	2.94256	1375	0.933326	2100	1.77604	NA	NA	1875	0.954905
chr22	33197687	33237687	+	ENST00000266085	ENSG00000100234	TIMP3	protein_coding	1650	10.2755	1675	12.5474	1850	3.88651	NA	NA	NA	NA
chr3	49409635	49449635	-	ENST00000418115	ENSG00000067560	RHOA	protein_coding	1650	5.38362	900	1.7746	1800	4.72849	1500	0.9564	1800	0.995811
chr3	142257668	142297668	-	ENST00000350721	ENSG00000175054	ATR	protein_coding	1650	0.584324	625	0.554203	1775	0.869497	625	0.969415	1875	1.37651
chr3	172468472	172508472	+	ENST00000232458	ENSG00000114346	ECT2	protein_coding	1650	2.14183	1625	0.778479	1650	3.54387	1650	2.84443	1625	1.85298
chr4	39600710	39640710	-	ENST00000295958	ENSG00000163683	C4orf34	protein_coding	1650	0.677611	750	0.559887	1850	1.20508	600	0.606671	1750	1.31291
chr5	157246183	157286183	-	ENST00000411809	ENSG00000113282	CLINT1	protein_coding	1650	2.02554	1500	0.993128	2000	2.21748	1350	1.09201	1675	1.05373
chr5	171671075	171711075	-	ENST00000393792	ENSG00000168246	UBTD2	protein_coding	1650	1.87681	1325	0.857344	1800	2.16454	NA	NA	1925	0.867857
chr5	172410760	172450760	+	ENST00000519374	ENSG00000113732	ATP6V0E1	protein_coding	1650	2.20865	1650	1.7003	1900	2.1266	1325	1.18018	2125	2.49809
chr6	111096840	111136840	-	ENST00000323817	ENSG00000155111	CDK19	protein_coding	1650	0.838507	NA	NA	1700	0.750611	950	0.676785	1525	1.05297
chr6	142468367	142508367	+	ENST00000367630	ENSG00000009844	VTA1	protein_coding	1650	1.42061	1175	0.91157	1900	2.66476	1125	1.01826	2125	1.18049
chr7	23013749	23053749	-	ENST00000440481	ENSG00000122591	FAM126A	protein_coding	1650	2.60636	1750	3.49143	1950	5.62766	1725	0.66377	NA	NA
chr7	115850547	115890547	+	ENST00000358204	ENSG00000135269	TES	protein_coding	1650	1.92435	1650	1.8815	NA	NA	1650	5.27378	NA	NA
chr7	156931607	156971607	+	ENST00000348165	ENSG00000009335	UBE3C	protein_coding	1650	1.90024	1375	0.983718	1850	2.26089	725	2.08787	2075	2.06143
chr8	98656407	98696407	+	ENST00000336273	ENSG00000147649	MTDH	protein_coding	1650	2.20667	1175	1.56561	1850	2.72798	1750	1.52725	1925	4.71857
chr8	130912118	130952118	-	ENST00000519540	ENSG00000153310	FAM49B	protein_coding	1650	1.57906	NA	NA	1625	1.22769	NA	NA	2050	1.60765
chr9	26907461	26947461	-	ENST00000397292	ENSG00000137055	PLAA	protein_coding	1650	1.68286	NA	NA	NA	NA	1200	0.58512	2100	1.13336
chr9	110045560	110085560	+	ENST00000358015	ENSG00000119318	RAD23B	protein_coding	1650	3.76637	1825	5.99279	1850	13.6083	1650	2.59602	2150	5.15752
chr9	128024073	128064073	+	ENST00000497580	ENSG00000165219	GAPVD1	protein_coding	1650	0.576718	NA	NA	1725	1.13159	1650	1.47029	1975	0.89011
chr9	128509624	128549624	+	ENST00000342287	ENSG00000167081	PBX3	protein_coding	1650	7.68547	1225	2.51723	1775	14.0479	NA	NA	1500	1.14754
chr1	1782502	1822502	-	ENST00000378606	ENSG00000078369	GNB1	protein_coding	1625	4.78592	1575	2.36628	1950	3.507	1575	1.92707	1925	1.34073
chr1	19243180	19283180	-	ENST00000455833	ENSG00000169991	IFFO2	protein_coding	1625	1.68677	NA	NA	NA	NA	NA	NA	NA	NA
chr1	66999066	67039066	+	ENST00000237247	ENSG00000118473	SGIP1	protein_coding	1625	11.7064	1500	8.10838	1950	9.06313	NA	NA	NA	NA
chr1	110091233	110131233	+	ENST00000369851	ENSG00000065135	GNAI3	protein_coding	1625	2.50128	1575	1.37018	1800	3.30608	1700	1.44664	2250	2.01944
chr1	247295307	247335307	-	ENST00000472531	ENSG00000196418	ZNF124	protein_coding	1625	0.979973	NA	NA	NA	NA	NA	NA	1675	2.26084
chr10	32177742	32217742	-	ENST00000375250	ENSG00000165322	ARHGAP12	protein_coding	1625	1.7006	2100	2.67379	NA	NA	1700	0.826669	2125	2.50595
chr10	35625455	35665455	+	ENST00000537547	ENSG00000108100	CCNY	protein_coding	1625	1.81638	1475	1.1864	2250	2.14748	2000	2.17352	2050	1.23099
chr10	75757872	75797872	+	ENST00000372755	ENSG00000035403	VCL	protein_coding	1625	4.56154	1625	9.30084	1750	6.04171	1625	2.5623	1675	1.13096
chr10	79358353	79398353	-	ENST00000286627	ENSG00000156113	KCNMA1	protein_coding	1625	3.22888	1050	0.560567	1775	3.09165	NA	NA	NA	NA
chr10	93170096	93210096	+	ENST00000446394	ENSG00000165338	HECTD2	protein_coding	1625	0.670105	1550	0.839504	1650	1.2345	NA	NA	1650	0.971376
chr10	105726959	105766959	+	ENST00000369755	ENSG00000065613	SLK	protein_coding	1625	1.28868	1850	0.841679	1950	2.72702	1725	0.679584	1925	1.71772
chr11	32914724	32954724	+	ENST00000399302	ENSG00000060749	QSER1	protein_coding	1625	1.6868	1525	0.584036	NA	NA	1575	1.95688	NA	NA
chr12	861759	901759	+	ENST00000535572	ENSG00000060237	WNK1	protein_coding	1625	1.41584	1450	1.41021	1725	2.7422	1375	0.910497	1750	1.56522
chr12	69004619	69044619	+	ENST00000250559	ENSG00000127314	RAP1B	protein_coding	1625	5.17768	1600	4.72635	1700	9.1071	1875	4.05791	1975	4.4823
chr12	95571258	95611258	-	ENST00000451107	ENSG00000180263	FGD6	protein_coding	1625	0.769751	900	0.513329	NA	NA	1100	1.18256	2000	1.48712
chr13	43597339	43637339	+	ENST00000379221	ENSG00000120675	DNAJC15	protein_coding	1625	0.987553	1125	0.661269	1650	1.12523	NA	NA	1750	1.29502
chr13	50616114	50656114	-	ENST00000416253	ENSG00000231607	DLEU2	lincRNA	1625	2.81111	NA	NA	1650	5.21861	1425	2.71106	NA	NA
chr14	69406157	69446157	-	ENST00000193403	ENSG00000072110	ACTN1	protein_coding	1625	15.4342	1575	7.99582	1700	4.81624	NA	NA	1725	2.33654
chr14	102605840	102645840	+	ENST00000557485	ENSG00000140153	WDR20	protein_coding	1625	1.73451	1350	1.10868	NA	NA	1300	0.942125	NA	NA
chr15	90931450	90971450	+	ENST00000268182	ENSG00000140575	IQGAP1	protein_coding	1625	3.93817	2075	2.42219	2075	5.43248	1650	0.977252	2025	1.2119
chr17	34900781	34940781	+	ENST00000495023	ENSG00000005955	GGNBP2	protein_coding	1625	2.71777	1675	1.68551	2050	3.58897	NA	NA	NA	NA
chr17	37026112	37066112	+	ENST00000318008	ENSG00000002834	LASP1	protein_coding	1625	6.45845	NA	NA	1900	2.95209	NA	NA	NA	NA
chr18	772547	812547	-	ENST00000584307	ENSG00000176105	YES1	protein_coding	1625	1.61761	NA	NA	1925	1.89462	1875	6.00444	1925	1.3908
chr18	29078006	29118006	+	ENST00000261590	ENSG00000046604	DSG2	protein_coding	1625	0.520316	NA	NA	NA	NA	1425	0.82303	1550	0.595261
chr18	33161003	33201003	+	ENST00000537748	ENSG00000141429	GALNT1	protein_coding	1625	1.30943	1625	0.750903	1975	1.27618	1575	0.827928	2300	1.04032
chr19	8509651	8549651	+	ENST00000325495	ENSG00000099783	HNRNPM	protein_coding	1625	4.51347	1850	1.74637	1900	3.70864	1925	4.83966	1925	3.89151
chr2	9655917	9695917	-	ENST00000310823	ENSG00000151694	ADAM17	protein_coding	1625	1.49939	1375	1.15619	2125	2.31146	1325	2.12174	2075	1.57067
chr2	39966407	40006407	-	ENST00000378727	ENSG00000138050	THUMPD2	protein_coding	1625	2.35862	1375	1.4989	1775	2.84566	1400	2.47665	1750	1.54711
chr2	100066497	100106497	-	ENST00000258428	ENSG00000135945	REV1	protein_coding	1625	1.88997	NA	NA	NA	NA	1750	1.42746	NA	NA
chr2	172778958	172818958	+	ENST00000392584	ENSG00000128708	HAT1	protein_coding	1625	1.07974	NA	NA	1550	1.5912	NA	NA	1725	1.16063
chr20	32399110	32439110	+	ENST00000217402	ENSG00000101421	CHMP4B	protein_coding	1625	2.49503	1625	1.17193	1900	1.94878	1050	0.799379	1925	1.39178
chr3	43328004	43368004	+	ENST00000454177	ENSG00000163788	SNRK	protein_coding	1625	1.76345	1075	0.994242	1800	1.81358	1075	0.920713	2000	0.745467
chr3	99979845	100019845	+	ENST00000344949	ENSG00000036054	TBC1D23	protein_coding	1625	1.89609	1100	1.38647	1725	3.12398	1150	1.59988	1725	0.965268
chr3	137906109	137946109	+	ENST00000481646	ENSG00000114098	ARMC8	protein_coding	1625	1.50626	775	0.787099	1775	1.77411	1350	1.7618	2075	1.34684
chr3	187871072	187911072	+	ENST00000448637	ENSG00000145012	LPP	protein_coding	1625	3.04829	1800	2.33756	1875	1.8278	NA	NA	2075	1.20525
chr4	57261781	57301781	-	ENST00000264220	ENSG00000128059	PPAT	protein_coding	1625	0.771338	NA	NA	1750	0.940344	1350	1.49884	1700	1.55093
chr4	150999426	151039426	+	ENST00000296550	ENSG00000170390	DCLK2	protein_coding	1625	7.7233	1850	3.52937	2025	4.6863	NA	NA	NA	NA
chr5	132259326	132299326	-	ENST00000265343	ENSG00000072364	AFF4	protein_coding	1625	3.94808	NA	NA	1875	3.7808	1300	1.50597	2075	2.81137
chr7	135154875	135194875	-	ENST00000541284	ENSG00000080802	CNOT4	protein_coding	1625	1.82078	1550	0.91777	2000	2.03337	1925	2.25539	1875	1.8905
chr7	137646813	137686813	-	ENST00000456390	ENSG00000182158	CREB3L2	protein_coding	1625	6.36869	1625	3.22463	1800	4.28503	1025	2.62653	1675	0.684272
chr8	25042238	25082238	+	ENST00000410074	ENSG00000147459	DOCK5	protein_coding	1625	5.8411	1725	3.9898	1975	9.05982	NA	NA	1600	0.789973
chr8	32405728	32445728	+	ENST00000341377	ENSG00000157168	NRG1	protein_coding	1625	5.77919	1750	7.02657	1925	3.71253	NA	NA	NA	NA
chr8	79578282	79618282	+	ENST00000263849	ENSG00000104427	ZC2HC1A	protein_coding	1625	0.998509	650	0.773502	NA	NA	NA	NA	1550	0.522612
chr9	34179003	34219003	+	ENST00000543944	ENSG00000165006	UBAP1	protein_coding	1625	1.48285	1750	1.19698	2075	2.1301	1325	0.785104	1950	0.722451
chr9	74526426	74566426	+	ENST00000479413	ENSG00000155621	C9orf85	protein_coding	1625	1.77496	NA	NA	1775	1.61969	1625	0.506749	NA	NA
chr9	95487094	95527094	-	ENST00000375512	ENSG00000185963	BICD2	protein_coding	1625	1.50438	NA	NA	1750	0.746806	NA	NA	1800	0.534284
chr9	103075221	103115221	-	ENST00000374902	ENSG00000136891	TEX10	protein_coding	1625	1.57666	1350	1.28792	1625	1.9911	1350	2.06982	1575	2.01551
chr9	113302160	113342160	-	ENST00000401783	ENSG00000165124	SVEP1	protein_coding	1625	0.644731	NA	NA	NA	NA	NA	NA	NA	NA
chr1	10270863	10310863	+	ENST00000377093	ENSG00000054523	KIF1B	protein_coding	1600	1.20247	1825	1.04928	1875	1.89057	NA	NA	NA	NA
chr1	14075930	14115930	+	ENST00000503842	ENSG00000116731	PRDM2	protein_coding	1600	3.91513	1600	2.79555	1775	3.14741	1775	1.54166	1800	1.36647
chr1	22379120	22419120	+	ENST00000400259	ENSG00000070831	CDC42	protein_coding	1600	4.60844	1650	2.52746	1775	4.89552	1650	2.5623	1675	1.55213
chr1	31498838	31538838	-	ENST00000373741	ENSG00000134644	PUM1	protein_coding	1600	2.0966	1175	1.33214	1600	1.9941	1175	2.12048	1600	1.44807
chr1	47799469	47839469	+	ENST00000371873	ENSG00000162368	CMPK1	protein_coding	1600	1.22665	1075	0.849647	1600	1.76331	1175	1.40605	1175	0.517376
chr1	68259150	68299150	-	ENST00000370982	ENSG00000172380	GNG12	protein_coding	1600	3.29988	1425	1.90279	1675	3.97125	NA	NA	NA	NA
chr1	162601163	162641163	+	ENST00000446985	ENSG00000162733	DDR2	protein_coding	1600	3.24234	1675	2.22625	1875	7.80898	NA	NA	NA	NA
chr1	184903682	184943682	-	ENST00000367511	ENSG00000135842	FAM129A	protein_coding	1600	1.50719	NA	NA	1850	1.90681	925	4.9964	NA	NA
chr1	198126093	198166093	+	ENST00000367385	ENSG00000151414	NEK7	protein_coding	1600	4.48874	2175	18.179	1625	8.37376	1425	1.44775	2150	2.12143
chr10	22252698	22292698	-	ENST00000376946	ENSG00000136770	DNAJC1	protein_coding	1600	0.578595	NA	NA	1675	0.941501	1775	2.09837	1750	1.21605
chr10	50707072	50747072	-	ENST00000355832	ENSG00000225830	ERCC6	protein_coding	1600	2.6686	1600	1.8744	1725	4.36351	1150	0.845702	1625	1.21277
chr10	101729676	101769676	-	ENST00000324109	ENSG00000107554	DNMBP	protein_coding	1600	3.1511	1600	2.37008	1700	6.7656	NA	NA	1700	1.09039
chr10	118725113	118765113	-	ENST00000469231	ENSG00000187164	KIAA1598	protein_coding	1600	0.944159	NA	NA	1675	0.923589	1350	0.71751	1725	1.68696
chr11	8852965	8892965	-	ENST00000533471	ENSG00000166444	ST5	protein_coding	1600	1.38815	900	0.622217	1625	0.995059	NA	NA	NA	NA
chr12	1639057	1679057	+	ENST00000539198	ENSG00000111186	WNT5B	protein_coding	1600	9.1373	1600	10.0288	1875	4.33202	NA	NA	NA	NA
chr12	15902510	15942510	-	ENST00000281172	ENSG00000151491	EPS8	protein_coding	1600	3.21202	1625	2.30677	1700	1.21837	NA	NA	2000	1.33309
chr12	50898768	50938768	+	ENST00000549620	ENSG00000066084	DIP2B	protein_coding	1600	1.32048	NA	NA	2125	1.02094	1175	0.999223	2075	1.29055
chr12	56915713	56955713	+	ENST00000262031	ENSG00000076067	RBMS2	protein_coding	1600	1.32383	1425	2.07823	2100	1.85695	NA	NA	NA	NA
chr12	62654119	62694119	+	ENST00000353364	ENSG00000135655	USP15	protein_coding	1600	1.54463	1650	1.37913	1975	2.67157	1775	4.60959	1950	2.43111
chr12	116675143	116715143	-	ENST00000281928	ENSG00000123066	MED13L	protein_coding	1600	2.61961	1850	2.27545	1825	6.03724	1850	3.26175	2050	19.8139
chr13	28712643	28752643	+	ENST00000503791	ENSG00000152520	PAN3	protein_coding	1600	2.02948	1525	0.731513	1750	1.88	1450	0.877889	2000	1.56555
chr13	52158644	52198644	+	ENST00000298125	ENSG00000139668	WDFY2	protein_coding	1600	3.31499	1700	1.06625	1875	2.62491	1825	0.899301	1875	1.55431
chr14	31028329	31068329	+	ENST00000206595	ENSG00000092140	G2E3	protein_coding	1600	2.89267	1625	1.0408	1775	4.57767	1975	1.40241	2025	1.89705
chr14	53122618	53162618	-	ENST00000556039	ENSG00000197930	ERO1L	protein_coding	1600	1.08455	NA	NA	1975	1.12443	NA	NA	2025	1.60165
chr14	100030363	100070363	-	ENST00000380243	ENSG00000205476	CCDC85C	protein_coding	1600	1.41507	NA	NA	NA	NA	NA	NA	NA	NA
chr15	40173093	40213093	-	ENST00000561100	ENSG00000166073	GPR176	protein_coding	1600	6.07709	2125	3.62308	NA	NA	NA	NA	NA	NA
chr15	42224776	42264776	-	ENST00000220325	ENSG00000103966	EHD4	protein_coding	1600	1.24521	NA	NA	1900	0.576364	NA	NA	NA	NA
chr15	60650941	60690941	-	ENST00000559818	ENSG00000182718	ANXA2	protein_coding	1600	30.2954	2325	21.9245	1950	27.1065	2475	1.4332	NA	NA
chr15	66679155	66719155	+	ENST00000307102	ENSG00000169032	MAP2K1	protein_coding	1600	1.2859	NA	NA	1800	1.34222	1575	0.627803	2050	0.552501
chr15	72766667	72806667	+	ENST00000379887	ENSG00000166233	ARIH1	protein_coding	1600	2.82947	1600	1.55092	2000	3.18677	1600	1.52696	2125	2.34472
chr16	24741016	24781016	+	ENST00000315183	ENSG00000090905	TNRC6A	protein_coding	1600	3.60125	1600	2.63618	1925	4.00674	1600	2.78607	2025	2.11805
chr16	50362845	50402845	-	ENST00000394688	ENSG00000166164	BRD7	protein_coding	1600	1.45727	1500	1.09334	1950	1.84366	1475	1.94807	1950	1.17383
chr16	67596310	67636310	+	ENST00000264010	ENSG00000102974	CTCF	protein_coding	1600	0.956663	NA	NA	1625	0.957032	NA	NA	1600	1.38883
chr18	9913999	9953999	+	ENST00000400000	ENSG00000101558	VAPA	protein_coding	1600	4.77891	1575	2.31553	1875	6.64631	1600	15.1077	2100	4.29108
chr18	45417515	45457515	-	ENST00000356825	ENSG00000175387	SMAD2	protein_coding	1600	1.98529	1150	0.916302	1900	2.03793	1600	1.22048	2175	1.90817
chr2	36785334	36825334	-	ENST00000379245	ENSG00000171055	FEZ2	protein_coding	1600	3.98366	2000	4.73777	NA	NA	325	0.756135	1575	0.838187
chr2	64068074	64108074	+	ENST00000394417	ENSG00000169764	UGP2	protein_coding	1600	1.40951	1100	1.65222	1625	2.20112	1350	1.2251	1550	1.00737
chr2	69830849	69870849	-	ENST00000406297	ENSG00000115977	AAK1	protein_coding	1600	2.85189	1850	1.09106	1975	2.74605	1625	2.39072	1975	0.728777
chr2	148602086	148642086	+	ENST00000487959	ENSG00000121989	ACVR2A	protein_coding	1600	0.796636	1325	1.0191	1750	1.55565	NA	NA	1950	0.728777
chr2	149402009	149442009	+	ENST00000457184	ENSG00000135999	EPC2	protein_coding	1600	2.38072	1725	0.863898	1750	2.24616	1725	1.49884	1625	1.25172
chr2	161310305	161350305	-	ENST00000348849	ENSG00000153250	RBMS1	protein_coding	1600	2.04925	1625	3.27151	1625	1.8413	NA	NA	1650	0.763902
chr2	178257372	178297372	+	ENST00000264167	ENSG00000018510	AGPS	protein_coding	1600	0.887266	1625	0.773448	1775	1.19291	1650	1.6059	NA	NA
chr2	204360133	204400133	-	ENST00000319170	ENSG00000173166	RAPH1	protein_coding	1600	1.45127	NA	NA	NA	NA	NA	NA	NA	NA
chr20	3100842	3140842	-	ENST00000348031	ENSG00000185019	UBOX5	protein_coding	1600	2.36125	1375	0.965307	1650	1.65208	1375	0.801618	1650	1.04446
chr3	9439299	9479299	+	ENST00000431285	ENSG00000168137	SETD5	protein_coding	1600	4.1535	NA	NA	NA	NA	1800	6.10241	1975	5.04713
chr3	27485911	27525911	-	ENST00000428005	ENSG00000033867	SLC4A7	protein_coding	1600	7.02656	1450	1.98484	1800	7.45956	NA	NA	1775	3.07601
chr3	47165457	47205457	-	ENST00000409792	ENSG00000181555	SETD2	protein_coding	1600	2.09449	1525	1.25433	1925	3.01855	1600	2.391	1600	1.15463
chr3	136431220	136471220	-	ENST00000483235	ENSG00000118007	STAG1	protein_coding	1600	2.48045	1250	1.31637	1825	2.46144	1400	0.66377	1625	1.49355
chr3	151985829	152025829	+	ENST00000282486	ENSG00000152601	MBNL1	protein_coding	1600	8.02644	1600	5.537	1825	9.80451	1725	8.36801	1825	1.27692
chr4	4504073	4544073	-	ENST00000507908	ENSG00000168818	STX18	protein_coding	1600	2.03381	1600	1.16087	1775	1.8413	1275	0.899721	1775	0.545192
chr4	7901653	7941653	-	ENST00000358461	ENSG00000196526	AFAP1	protein_coding	1600	2.57375	1600	2.65196	1775	3.8411	NA	NA	NA	NA
chr4	47876653	47916653	-	ENST00000464756	ENSG00000170448	NFXL1	protein_coding	1600	0.654982	NA	NA	1875	0.860374	1150	1.06976	2050	1.15791
chr4	54243812	54283812	+	ENST00000358575	ENSG00000145216	FIP1L1	protein_coding	1600	2.03288	2025	3.55167	2025	6.27143	1625	2.34972	2125	1.83073
chr4	68526897	68566897	-	ENST00000322244	ENSG00000033178	UBA6	protein_coding	1600	1.64005	1200	0.942219	1800	2.45945	1200	2.13308	1925	1.37487
chr4	110354928	110394928	+	ENST00000504968	ENSG00000138802	SEC24B	protein_coding	1600	2.19961	1725	1.34484	1900	2.91344	1575	0.856477	1900	1.38523
chr5	17217669	17257669	+	ENST00000322611	ENSG00000176788	BASP1	protein_coding	1600	3.41797	1525	1.94302	1775	4.35093	NA	NA	NA	NA
chr5	125758838	125798838	+	ENST00000515200	ENSG00000155324	GRAMD3	protein_coding	1600	8.83956	1775	15.2918	1600	6.5778	NA	NA	1775	2.00951
chr5	133984479	134024479	+	ENST00000398844	ENSG00000113615	SEC24A	protein_coding	1600	1.1565	1500	0.893105	NA	NA	1300	0.803717	NA	NA
chr5	138940751	138980751	+	ENST00000253815	ENSG00000131508	UBE2D2	protein_coding	1600	2.4059	1475	1.35343	1800	2.26218	600	1.81862	1775	1.90752
chr6	35995488	36035488	+	ENST00000229795	ENSG00000112062	MAPK14	protein_coding	1600	1.28434	1325	0.855386	1975	1.72248	1100	0.825829	1975	1.27702
chr6	53173947	53213947	-	ENST00000370918	ENSG00000012660	ELOVL5	protein_coding	1600	4.27575	1625	1.24041	2075	3.38255	1700	2.3339	1925	4.48393
chr6	110501344	110541344	+	ENST00000368932	ENSG00000168438	CDC40	protein_coding	1600	0.819013	NA	NA	1850	1.48182	1600	0.570985	1825	1.0377
chr7	17338246	17378246	+	ENST00000242057	ENSG00000106546	AHR	protein_coding	1600	2.47167	1200	0.735103	1875	3.30481	NA	NA	2000	1.17765
chr7	123349121	123389121	-	ENST00000223023	ENSG00000106299	WASL	protein_coding	1600	1.7845	1675	1.33986	1675	3.21863	1675	6.42247	2150	6.15595
chr7	154754794	154794794	-	ENST00000404141	ENSG00000157212	PAXIP1	protein_coding	1600	0.802933	NA	NA	1625	1.07027	1575	1.43432	1625	1.62718
chr8	6264113	6304113	+	ENST00000344683	ENSG00000147316	MCPH1	protein_coding	1600	1.13097	NA	NA	1625	1.25166	NA	NA	NA	NA
chr8	54716118	54756118	-	ENST00000355221	ENSG00000047249	ATP6V1H	protein_coding	1600	1.88376	1750	1.12442	NA	NA	1600	1.27828	1850	3.42016
chr8	105561417	105601417	-	ENST00000523830	ENSG00000147650	LRP12	protein_coding	1600	2.39138	1775	1.40526	2050	1.56123	1725	5.23166	1625	0.665074
chrX	77001702	77041702	-	ENST00000373344	ENSG00000085224	ATRX	protein_coding	1600	0.886623	1800	0.509087	1875	1.10729	1325	0.649495	1900	1.21278
chr1	36067445	36107445	-	ENST00000373237	ENSG00000126067	PSMB2	protein_coding	1575	1.83151	1525	1.2326	1575	2.30606	1575	1.97634	1575	1.42254
chr1	91447829	91487829	-	ENST00000361321	ENSG00000122482	ZNF644	protein_coding	1575	2.5319	1275	1.48315	1875	4.02614	1575	2.46797	1575	1.74237
chr1	172501489	172541489	+	ENST00000367723	ENSG00000094975	C1orf9	protein_coding	1575	2.24181	1575	1.5342	2100	3.61543	1575	1.66201	1575	3.56328
chr1	212208919	212248919	+	ENST00000366991	ENSG00000143476	DTL	protein_coding	1575	1.55891	NA	NA	NA	NA	1575	3.95897	1600	0.684927
chr1	245318287	245358287	+	ENST00000407071	ENSG00000162849	KIF26B	protein_coding	1575	1.70379	700	2.1689	NA	NA	NA	NA	NA	NA
chr10	22963484	23003484	-	ENST00000376573	ENSG00000150867	PIP4K2A	protein_coding	1575	4.43055	1125	0.784842	1900	1.63068	1775	3.31018	1775	1.36854
chr10	70883268	70923268	+	ENST00000373382	ENSG00000122958	VPS26A	protein_coding	1575	1.4764	1475	0.736653	2100	2.4629	1575	2.07444	2100	1.84491
chr10	80828792	80868792	+	ENST00000334512	ENSG00000108175	ZMIZ1	protein_coding	1575	10.3907	2025	4.09913	2275	2.38369	NA	NA	1850	0.534066
chr10	82213922	82253922	+	ENST00000429989	ENSG00000108219	TSPAN14	protein_coding	1575	3.18249	NA	NA	1550	0.584308	1575	0.749417	1925	1.82473
chr10	99258625	99298625	+	ENST00000370664	ENSG00000165886	UBTD1	protein_coding	1575	1.81262	1500	0.63296	1725	1.17803	NA	NA	1650	0.500687
chr11	13444844	13484844	-	ENST00000525108	ENSG00000148925	BTBD10	protein_coding	1575	1.78773	1375	1.27897	NA	NA	1225	0.842622	1825	1.09595
chr12	30808920	30848920	-	ENST00000256079	ENSG00000133704	IPO8	protein_coding	1575	0.715628	875	0.629342	NA	NA	50	0.676785	NA	NA
chr12	50794592	50834592	+	ENST00000293618	ENSG00000161813	LARP4	protein_coding	1575	1.19021	1425	0.839477	1700	1.65793	1575	1.3204	2025	2.26978
chr12	99038919	99078919	+	ENST00000551964	ENSG00000120868	APAF1	protein_coding	1575	0.947824	725	0.545745	1800	1.55333	925	0.911057	NA	NA
chr12	102271129	102311129	+	ENST00000258534	ENSG00000136048	DRAM1	protein_coding	1575	3.44067	1675	1.75363	1925	1.92679	NA	NA	1775	1.31095
chr12	111997480	112037480	-	ENST00000550104	ENSG00000204842	ATXN2	protein_coding	1575	3.18153	1400	1.35044	1975	3.23508	1400	1.47742	1475	1.92268
chr13	20317082	20357082	-	ENST00000492741	ENSG00000121390	PSPC1	protein_coding	1575	1.35507	1200	0.633775	2000	1.54072	175	0.815613	2175	2.28811
chr13	33160564	33200564	+	ENST00000315596	ENSG00000083642	PDS5B	protein_coding	1575	0.760584	NA	NA	1575	1.28258	1025	0.706594	1600	1.38502
chr13	37593850	37633850	-	ENST00000360252	ENSG00000102710	FAM48A	protein_coding	1575	1.17528	1525	1.05665	1825	2.25444	275	0.994046	2050	1.54209
chr14	52118576	52158576	+	ENST00000395718	ENSG00000139926	FRMD6	protein_coding	1575	32.8486	1650	40.1321	1825	24.744	NA	NA	1650	1.14602
chr14	71374122	71414122	+	ENST00000238570	ENSG00000100731	PCNX	protein_coding	1575	2.06016	NA	NA	NA	NA	NA	NA	NA	NA
chr14	75139818	75179818	-	ENST00000356357	ENSG00000119682	KIAA0317	protein_coding	1575	1.16089	1750	0.985649	1775	1.46486	NA	NA	1775	1.39254
chr15	81071684	81111684	+	ENST00000220244	ENSG00000103888	KIAA1199	protein_coding	1575	9.19776	1500	8.91936	1900	5.41864	NA	NA	NA	NA
chr15	89787180	89827180	+	ENST00000300027	ENSG00000140525	FANCI	protein_coding	1575	0.841353	NA	NA	1725	1.35995	1225	2.69259	1700	1.48188
chr16	16043434	16083434	+	ENST00000349029	ENSG00000103222	ABCC1	protein_coding	1575	2.32911	1550	0.670297	1900	1.77486	NA	NA	2175	1.23503
chr16	22018959	22058959	+	ENST00000567004	ENSG00000185716	C16orf52	protein_coding	1575	1.3423	1375	0.609327	2050	1.69273	1150	0.870752	2000	0.617514
chr17	16945859	16985859	+	ENST00000577514	ENSG00000133030	MPRIP	protein_coding	1575	2.66924	1225	1.21207	1575	2.11345	NA	NA	1575	0.856731
chr17	47399835	47439835	-	ENST00000362063	ENSG00000198740	ZNF652	protein_coding	1575	1.40335	1450	0.741005	1650	1.61986	1400	0.806516	1675	1.7752
chr17	49158226	49198226	-	ENST00000357122	ENSG00000008294	SPAG9	protein_coding	1575	1.5309	1575	0.707691	1900	2.17584	1125	1.10069	1900	1.73135
chr17	57697219	57737219	+	ENST00000393043	ENSG00000141367	CLTC	protein_coding	1575	3.6601	1600	3.6329	1650	6.46174	1600	2.69077	1650	15.3851
chr19	3359616	3399616	+	ENST00000346156	ENSG00000141905	NFIC	protein_coding	1575	2.39777	NA	NA	2050	0.864758	NA	NA	1950	0.778411
chr2	172251312	172291312	-	ENST00000462821	ENSG00000123600	METTL8	protein_coding	1575	0.519611	NA	NA	NA	NA	NA	NA	1450	0.539629
chr2	200776029	200816029	+	ENST00000491721	ENSG00000178074	C2orf69	protein_coding	1575	1.50476	2025	0.949453	1900	2.02027	1725	0.887545	1950	1.32491
chr2	207991991	208031991	-	ENST00000457962	ENSG00000118263	KLF7	protein_coding	1575	7.41234	1650	9.59052	1875	5.94835	NA	NA	NA	NA
chr2	224770104	224810104	-	ENST00000233055	ENSG00000085449	WDFY1	protein_coding	1575	1.8859	1425	1.80337	1825	2.18399	NA	NA	NA	NA
chr20	484482	524482	-	ENST00000400217	ENSG00000101266	CSNK2A1	protein_coding	1575	1.93142	1275	0.92582	1900	2.35227	1675	1.52053	1675	1.44087
chr20	3348272	3388272	-	ENST00000252032	ENSG00000088854	C20orf194	protein_coding	1575	1.10739	1200	0.818564	2125	1.21174	NA	NA	NA	NA
chr20	30327074	30367074	+	ENST00000340513	ENSG00000088325	TPX2	protein_coding	1575	1.95687	NA	NA	2300	2.35915	975	3.76011	1975	1.27953
chr22	28276122	28316122	-	ENST00000415296	ENSG00000180957	PITPNB	protein_coding	1575	2.94863	1500	1.30693	NA	NA	1625	1.27044	1525	1.31848
chr22	41487790	41527790	+	ENST00000263253	ENSG00000100393	EP300	protein_coding	1575	2.41575	1800	1.24582	1800	2.69013	1250	1.08753	1825	2.04725
chr3	31574130	31614130	+	ENST00000453168	ENSG00000163527	STT3B	protein_coding	1575	1.63109	1175	0.660399	1675	2.08459	1850	2.13546	2000	1.88789
chr3	38206996	38246996	+	ENST00000311806	ENSG00000172939	OXSR1	protein_coding	1575	3.06247	1575	1.1663	1950	3.45162	1250	0.883067	2075	1.1614
chr3	98580533	98620533	-	ENST00000326840	ENSG00000057019	DCBLD2	protein_coding	1575	3.53058	2025	3.76069	1825	9.71114	NA	NA	1775	0.901564
chr3	133929689	133969689	-	ENST00000427044	ENSG00000163785	RYK	protein_coding	1575	2.50653	1475	1.26304	1925	2.95536	1800	0.735143	2100	2.35879
chr3	150126122	150166122	+	ENST00000361136	ENSG00000196428	TSC22D2	protein_coding	1575	8.68914	2150	12.3538	NA	NA	NA	NA	2250	6.70354
chr3	169940153	169980153	+	ENST00000295797	ENSG00000163558	PRKCI	protein_coding	1575	1.19827	1150	0.729012	1925	1.44188	1525	0.611429	1800	1.00486
chr3	176875261	176915261	-	ENST00000422442	ENSG00000177565	TBL1XR1	protein_coding	1575	1.94104	1600	1.51312	2000	2.19398	1525	3.74709	2075	4.0776
chr4	71768043	71808043	+	ENST00000502869	ENSG00000173542	MOB1B	protein_coding	1575	1.47399	1350	0.681856	1600	1.45427	1600	2.23888	NA	NA
chr4	74084515	74124515	-	ENST00000561029	ENSG00000132466	ANKRD17	protein_coding	1575	2.70964	1575	1.70055	NA	NA	1625	3.88802	2200	2.95809
chr4	77610724	77650724	+	ENST00000486758	ENSG00000138771	SHROOM3	protein_coding	1575	2.31785	NA	NA	NA	NA	NA	NA	1450	2.02151
chr4	79697496	79737496	+	ENST00000389010	ENSG00000138756	BMP2K	protein_coding	1575	2.07562	1675	2.0311	1675	3.37167	1650	10.679	1675	0.904182
chr5	36202381	36242381	-	ENST00000506945	ENSG00000152620	NADKD1	protein_coding	1575	0.807013	NA	NA	NA	NA	2500	1.26092	1775	0.577699
chr5	54603588	54643588	+	ENST00000230640	ENSG00000039123	SKIV2L2	protein_coding	1575	1.08134	900	0.816008	1750	1.82217	1250	2.09025	1800	1.22041
chr6	43044006	43084006	+	ENST00000230419	ENSG00000112655	PTK7	protein_coding	1575	1.23316	1825	1.7675	1800	0.629967	NA	NA	NA	NA
chr6	86159809	86199809	+	ENST00000257770	ENSG00000135318	NT5E	protein_coding	1575	4.13608	1650	2.379	1575	6.7037	NA	NA	NA	NA
chr6	91256764	91296764	-	ENST00000369329	ENSG00000135341	MAP3K7	protein_coding	1575	2.28837	1350	1.04942	1725	2.42074	1550	1.77327	1875	1.67267
chr7	5423177	5463177	-	ENST00000399537	ENSG00000182095	TNRC18	protein_coding	1575	2.24911	1800	1.37277	1775	1.72863	1075	1.29899	NA	NA
chr7	6272275	6312275	-	ENST00000482460	ENSG00000008256	CYTH3	protein_coding	1575	3.30517	1625	2.7114	1800	4.07175	1750	0.678324	NA	NA
chr7	35694745	35734745	-	ENST00000396081	ENSG00000122557	HERPUD2	protein_coding	1575	1.09083	825	0.912577	NA	NA	825	0.904059	NA	NA
chr7	65670186	65710186	+	ENST00000304842	ENSG00000169902	TPST1	protein_coding	1575	1.19194	1225	1.03939	1850	1.28548	NA	NA	NA	NA
chr7	79042890	79082890	-	ENST00000354212	ENSG00000187391	MAGI2	protein_coding	1575	0.824781	NA	NA	1975	0.923122	NA	NA	NA	NA
chr7	98701723	98741723	-	ENST00000361125	ENSG00000198742	SMURF1	protein_coding	1575	3.66957	1425	1.77473	1750	3.85412	1675	1.68161	1725	2.46438
chr7	116502527	116542527	+	ENST00000361183	ENSG00000198898	CAPZA2	protein_coding	1575	3.30835	1475	2.11293	1625	3.5165	1650	1.77719	2200	2.04725
chr7	124530037	124570037	-	ENST00000393329	ENSG00000128513	POT1	protein_coding	1575	0.636823	NA	NA	1775	1.6268	1600	1.47001	1775	0.806662
chr7	138754465	138794465	-	ENST00000471652	ENSG00000105939	ZC3HAV1	protein_coding	1575	1.43819	NA	NA	1700	1.25299	1575	1.30949	1700	1.29622
chr7	148395006	148435006	+	ENST00000409469	ENSG00000055130	CUL1	protein_coding	1575	3.51831	1275	1.13514	2100	3.24711	1900	1.81288	2100	1.99369
chr8	52771735	52811735	-	ENST00000544451	ENSG00000168300	PCMTD1	protein_coding	1575	1.22942	1500	1.2006	1825	1.97212	1100	1.29899	1600	2.07747
chr8	66714557	66754557	-	ENST00000519626	ENSG00000205268	PDE7A	protein_coding	1575	0.669879	NA	NA	1725	0.944127	1525	1.30613	1925	1.96773
chr8	124513446	124553446	-	ENST00000517956	ENSG00000156804	FBXO32	protein_coding	1575	1.73946	1600	35.3375	1750	1.97011	NA	NA	1600	0.801099
chr8	124780696	124820696	+	ENST00000521166	ENSG00000176853	FAM91A1	protein_coding	1575	1.63993	1250	1.31414	1575	2.37232	1225	1.47644	1900	10.1729
chr9	140513444	140553444	+	ENST00000462484	ENSG00000181090	EHMT1	protein_coding	1575	1.76492	NA	NA	1500	1.48189	NA	NA	NA	NA
chrX	21958691	21998691	+	ENST00000404933	ENSG00000102172	SMS	protein_coding	1575	3.52978	1575	0.642722	2075	3.65967	1325	0.77083	1675	1.2239
chr1	19772066	19812066	-	ENST00000401084	ENSG00000077549	CAPZB	protein_coding	1550	6.64062	1575	2.55705	1800	2.40705	1575	1.0135	2100	0.925344
chr1	32573639	32613639	+	ENST00000373625	ENSG00000025800	KPNA6	protein_coding	1550	1.55013	1375	0.88802	NA	NA	1000	1.83275	2250	0.872221
chr1	113458975	113498975	-	ENST00000369626	ENSG00000155380	SLC16A1	protein_coding	1550	0.824655	1000	0.526057	2000	1.50035	1050	3.1267	2100	0.867857
chr1	146714291	146754291	+	ENST00000431239	ENSG00000131778	CHD1L	protein_coding	1550	1.3927	1075	0.652621	1850	1.64556	1450	1.37288	1975	2.05653
chr1	167691187	167731187	+	ENST00000359523	ENSG00000197965	MPZL1	protein_coding	1550	2.24973	1675	1.63615	1925	2.54434	1525	1.12056	1925	1.10151
chr1	179923873	179963873	+	ENST00000367607	ENSG00000135837	CEP350	protein_coding	1550	1.45971	1525	0.574898	1625	2.23129	1275	1.36323	2175	2.52013
chr1	180601140	180641140	+	ENST00000367590	ENSG00000143324	XPR1	protein_coding	1550	0.671214	1650	0.727407	1650	0.730095	1550	2.49148	1650	0.741431
chr1	235627781	235667781	-	ENST00000366600	ENSG00000162885	B3GALNT2	protein_coding	1550	0.556671	1600	0.627874	2050	0.826998	2025	1.35609	2075	1.93599
chr1	236958610	236998610	+	ENST00000366577	ENSG00000116984	MTR	protein_coding	1550	1.29334	1775	0.91671	1650	1.25653	1575	1.89545	1900	1.70681
chr10	12045023	12085023	-	ENST00000397053	ENSG00000151461	UPF2	protein_coding	1550	0.775871	1575	0.745084	1750	1.25853	1550	1.95758	1675	1.31346
chr10	69795105	69835105	-	ENST00000373700	ENSG00000148634	HERC4	protein_coding	1550	13.3851	1050	6.47886	1475	27.1868	950	1.70932	1350	2.56736
chr10	70126946	70166946	-	ENST00000388768	ENSG00000204130	RUFY2	protein_coding	1550	0.843355	NA	NA	1750	1.16245	NA	NA	NA	NA
chr10	75936444	75976444	+	ENST00000372734	ENSG00000156110	ADK	protein_coding	1550	2.40008	1375	0.656021	1900	2.12858	NA	NA	2275	1.59293
chr10	93558069	93598069	+	ENST00000371627	ENSG00000107854	TNKS2	protein_coding	1550	1.71771	1100	1.27647	2000	2.07429	1100	0.933308	1975	2.27535
chr10	93683526	93723526	+	ENST00000265990	ENSG00000095564	BTAF1	protein_coding	1550	1.30441	1500	0.671549	NA	NA	1525	1.30347	NA	NA
chr10	119094978	119134978	-	ENST00000334464	ENSG00000165650	PDZD8	protein_coding	1550	1.28983	1775	0.814458	1775	2.20074	1775	2.16359	1750	1.04664
chr11	9685624	9725624	+	ENST00000447399	ENSG00000133789	SWAP70	protein_coding	1550	1.67256	1775	1.35387	1850	2.56757	NA	NA	NA	NA
chr11	73269234	73309234	-	ENST00000064778	ENSG00000054965	FAM168A	protein_coding	1550	0.532657	1450	0.993073	1875	0.867205	NA	NA	2075	0.822807
chr11	95617459	95657459	-	ENST00000346299	ENSG00000087053	MTMR2	protein_coding	1550	1.93112	1550	1.353	1750	2.04301	1550	0.614648	NA	NA
chr12	22778009	22818009	+	ENST00000266517	ENSG00000139163	ETNK1	protein_coding	1550	1.46592	725	0.736055	2025	2.19127	1325	2.08633	2275	1.19489
chr12	109085372	109125372	-	ENST00000261401	ENSG00000110880	CORO1C	protein_coding	1550	5.75236	1550	7.27559	1975	11.8819	1550	1.93841	1900	1.00137
chr13	30129825	30169825	-	ENST00000380752	ENSG00000139514	SLC7A1	protein_coding	1550	6.63262	1250	2.60964	1600	5.423	1550	0.934568	1600	1.51624
chr13	45523618	45563618	-	ENST00000379161	ENSG00000083635	NUFIP1	protein_coding	1550	0.833886	NA	NA	1675	0.851874	NA	NA	2050	1.18365
chr13	49550048	49590048	+	ENST00000492622	ENSG00000102531	FNDC3A	protein_coding	1550	1.70686	1400	0.51371	2075	2.432	1800	1.37484	1825	0.895892
chr13	103249353	103289353	+	ENST00000376065	ENSG00000134900	TPP2	protein_coding	1550	1.89606	1250	0.89422	1800	1.91504	1550	1.80322	1900	1.20176
chr14	55738021	55778021	+	ENST00000313833	ENSG00000178974	FBXO34	protein_coding	1550	1.16265	850	0.60949	1950	1.55494	1225	1.19193	1825	2.3829
chr14	93759438	93799438	-	ENST00000298896	ENSG00000011114	BTBD7	protein_coding	1550	2.77002	1300	1.12279	1825	2.51426	1550	0.813653	1850	2.89286
chr15	25644128	25684128	-	ENST00000232165	ENSG00000114062	UBE3A	protein_coding	1550	2.97887	NA	NA	NA	NA	1850	1.95562	NA	NA
chr15	63481668	63521668	+	ENST00000321437	ENSG00000166128	RAB8B	protein_coding	1550	1.18895	NA	NA	1925	1.63143	1700	1.45937	NA	NA
chr17	1263672	1303672	-	ENST00000264335	ENSG00000108953	YWHAE	protein_coding	1550	4.21092	1525	1.88512	1550	4.47694	NA	NA	2375	2.98253
chr17	74311010	74351010	-	ENST00000435555	ENSG00000161542	PRPSAP1	protein_coding	1550	1.02679	NA	NA	1600	0.605446	NA	NA	NA	NA
chr18	2973313	3013313	-	ENST00000584294	ENSG00000101577	LPIN2	protein_coding	1550	2.46688	1250	0.690912	NA	NA	NA	NA	NA	NA
chr18	43507305	43547305	-	ENST00000282041	ENSG00000152223	EPG5	protein_coding	1550	2.11293	1525	3.68917	1550	4.45807	1350	0.625004	1575	1.10293
chr18	55430327	55470327	-	ENST00000536015	ENSG00000081923	ATP8B1	protein_coding	1550	6.37571	1450	3.85533	1825	9.56498	NA	NA	1750	0.778737
chr19	926037	966037	+	ENST00000263620	ENSG00000116017	ARID3A	protein_coding	1550	1.97191	1400	0.501663	NA	NA	75	0.554891	NA	NA
chr2	58428507	58468507	-	ENST00000449070	ENSG00000115392	FANCL	protein_coding	1550	1.08061	NA	NA	NA	NA	1475	1.61639	1525	0.984576
chr2	122367163	122407163	-	ENST00000409078	ENSG00000074054	CLASP1	protein_coding	1550	1.1489	1300	0.620803	1750	1.19343	1675	0.785104	1675	0.751031
chr2	157291802	157331802	+	ENST00000415049	ENSG00000115159	GPD2	protein_coding	1550	0.746367	NA	NA	1450	0.547438	NA	NA	1550	0.50625
chr2	167192503	167232503	-	ENST00000409672	ENSG00000169432	SCN9A	protein_coding	1550	0.562338	NA	NA	1575	1.19258	1075	0.702255	NA	NA
chr2	189156396	189196396	+	ENST00000409843	ENSG00000144366	GULP1	protein_coding	1550	1.93443	1250	0.647671	NA	NA	1525	0.877889	1950	1.95944
chr2	192109911	192149911	+	ENST00000418908	ENSG00000128641	MYO1B	protein_coding	1550	3.56032	1700	3.46353	NA	NA	NA	NA	2175	1.80913
chr2	216260895	216300895	-	ENST00000354785	ENSG00000115414	FN1	protein_coding	1550	11.1408	1550	158.766	1550	44.3412	NA	NA	1550	0.666273
chr2	232825955	232865955	+	ENST00000273009	ENSG00000144535	DIS3L2	protein_coding	1550	0.876701	NA	NA	1775	0.998796	NA	NA	NA	NA
chr22	21173100	21213100	-	ENST00000485963	ENSG00000241973	PI4KA	protein_coding	1550	1.59973	NA	NA	2050	1.18877	1575	1.67727	1875	0.723215
chr22	40992706	41032706	-	ENST00000466278	ENSG00000196588	MKL1	protein_coding	1550	1.6372	1550	1.23462	1550	1.38612	1525	0.513886	1550	1.20721
chr3	14989091	15029091	+	ENST00000413118	ENSG00000177463	NR2C2	protein_coding	1550	1.46172	1100	0.707065	1700	1.47292	1550	1.65572	1575	1.36854
chr3	23244511	23284511	+	ENST00000425792	ENSG00000182247	UBE2E2	protein_coding	1550	0.783805	625	0.641553	1925	0.902873	NA	NA	NA	NA
chr3	25791530	25831530	-	ENST00000417874	ENSG00000151092	NGLY1	protein_coding	1550	0.60373	NA	NA	1775	0.609385	1700	1.1179	1825	1.27517
chr3	32572366	32612366	-	ENST00000273130	ENSG00000144635	DYNC1LI1	protein_coding	1550	1.93562	1050	1.48505	1900	1.80241	1050	1.12196	1750	1.2023
chr3	33442002	33482002	-	ENST00000283628	ENSG00000153560	UBP1	protein_coding	1550	2.25908	1675	1.11349	NA	NA	1700	1.51115	1700	2.63542
chr3	58318607	58358607	+	ENST00000356151	ENSG00000168297	PXK	protein_coding	1550	0.833684	1600	1.05494	1625	1.28663	NA	NA	NA	NA
chr3	73045936	73085936	+	ENST00000356692	ENSG00000163605	PPP4R2	protein_coding	1550	2.67629	1475	1.22741	1550	3.61172	1275	1.98011	1675	4.99455
chr3	123640564	123680564	-	ENST00000433542	ENSG00000175455	CCDC14	protein_coding	1550	1.58914	1550	1.28273	NA	NA	NA	NA	1550	1.12682
chr3	128444965	128484965	+	ENST00000265062	ENSG00000075785	RAB7A	protein_coding	1550	6.06381	1600	2.04763	1625	4.29115	1575	1.09915	1600	3.65655
chr3	141205889	141245889	+	ENST00000515549	ENSG00000155903	RASA2	protein_coding	1550	2.74589	1925	2.91969	1950	3.5594	1650	1.10586	1950	1.02363
chr3	148764341	148804341	-	ENST00000494055	ENSG00000071794	HLTF	protein_coding	1550	0.520517	NA	NA	1875	1.32522	1550	2.03581	1850	1.9037
chr3	149530495	149570495	+	ENST00000392894	ENSG00000082996	RNF13	protein_coding	1550	1.07661	1500	1.05872	NA	NA	NA	NA	NA	NA
chr3	180630090	180670090	+	ENST00000357559	ENSG00000114416	FXR1	protein_coding	1550	2.51396	1225	1.08597	1725	3.34126	1550	1.82715	2150	1.9637
chr4	52709166	52749166	+	ENST00000509376	ENSG00000109184	DCUN1D4	protein_coding	1550	2.23487	975	0.65893	NA	NA	1350	1.19277	1625	1.40072
chr4	72053003	72093003	+	ENST00000425175	ENSG00000080493	SLC4A4	protein_coding	1550	0.808473	1600	0.659175	1825	0.57385	NA	NA	NA	NA
chr4	123844229	123884229	+	ENST00000274008	ENSG00000145375	SPATA5	protein_coding	1550	0.775871	NA	NA	1550	1.1246	1200	1.88929	NA	NA
chr4	134070470	134110470	+	ENST00000264360	ENSG00000138650	PCDH10	protein_coding	1550	4.0518	NA	NA	NA	NA	NA	NA	1900	0.984685
chr4	184020446	184060446	+	ENST00000403733	ENSG00000151718	WWC2	protein_coding	1550	2.4022	1550	2.13963	2125	3.91546	1600	0.877749	2025	0.867858
chr5	39034510	39074510	-	ENST00000357387	ENSG00000164327	RICTOR	protein_coding	1550	2.72987	1975	1.33352	2000	2.11784	1550	3.69713	1950	1.1182
chr5	61601989	61641989	+	ENST00000401507	ENSG00000068796	KIF2A	protein_coding	1550	2.10418	1900	1.01127	1850	2.80701	1875	3.63989	2050	1.6887
chr5	81007616	81047616	-	ENST00000507655	ENSG00000145687	SSBP2	protein_coding	1550	0.918017	1625	0.927724	NA	NA	1650	1.65586	1550	0.926652
chr5	126326500	126366500	-	ENST00000308660	ENSG00000173926	2013-03-03	protein_coding	1550	0.788036	NA	NA	2125	0.561367	1725	2.45734	NA	NA
chr6	20172670	20212670	-	ENST00000541730	ENSG00000172197	MBOAT1	protein_coding	1550	1.43627	NA	NA	1700	0.571358	1425	0.842202	1850	1.17536
chr6	34624636	34664636	-	ENST00000374026	ENSG00000196821	C6orf106	protein_coding	1550	0.959547	1425	0.599591	NA	NA	1375	1.36323	NA	NA
chr6	42379789	42419789	-	ENST00000372917	ENSG00000124496	TRERF1	protein_coding	1550	1.48548	1450	0.649847	2050	1.70775	NA	NA	2075	0.901237
chr6	45389773	45429773	+	ENST00000478660	ENSG00000124813	RUNX2	protein_coding	1550	2.40251	2200	2.46385	2075	1.43309	NA	NA	1725	1.37411
chr6	135336036	135376036	-	ENST00000367837	ENSG00000112339	HBS1L	protein_coding	1550	1.37207	1875	0.881629	NA	NA	1875	3.99396	NA	NA
chr7	139437577	139477577	-	ENST00000428878	ENSG00000064393	HIPK2	protein_coding	1550	3.17969	1625	1.02195	2075	2.49408	1025	0.820791	2275	0.638785
chr8	9413424	9453424	+	ENST00000520408	ENSG00000173273	TNKS	protein_coding	1550	0.767661	1050	0.97061	2000	2.01644	1350	1.27688	2050	1.01316
chr8	16884747	16924747	+	ENST00000318063	ENSG00000155970	EFHA2	protein_coding	1550	2.209	NA	NA	1850	2.12725	NA	NA	NA	NA
chr8	23221753	23261753	-	ENST00000389131	ENSG00000134013	LOXL2	protein_coding	1550	9.10036	1375	1.59688	1800	5.07544	NA	NA	1575	0.693653
chr8	28747911	28787911	+	ENST00000444075	ENSG00000147421	HMBOX1	protein_coding	1550	0.937661	1550	0.615147	1600	1.09554	1600	2.44796	2100	0.756594
chr8	38854505	38894505	+	ENST00000487273	ENSG00000168615	ADAM9	protein_coding	1550	2.7219	1550	1.78648	2075	4.59609	1525	1.43096	2275	1.98279
chr8	67579831	67619831	+	ENST00000520044	ENSG00000104205	SGK3	protein_coding	1550	0.687496	NA	NA	1400	1.01468	1375	2.2316	1550	0.776774
chr8	121417642	121457642	-	ENST00000518696	ENSG00000172172	MRPL13	protein_coding	1550	0.969647	1350	0.716583	NA	NA	1100	1.15442	1475	0.966031
chr9	13239589	13279589	-	ENST00000319217	ENSG00000107186	MPDZ	protein_coding	1550	1.08278	1250	1.24253	1675	1.24852	NA	NA	1650	0.762266
chr9	20582542	20622542	-	ENST00000380338	ENSG00000171843	MLLT3	protein_coding	1550	0.727666	NA	NA	NA	NA	NA	NA	NA	NA
chrX	44732757	44772757	+	ENST00000377967	ENSG00000147050	KDM6A	protein_coding	1550	0.937624	1150	1.19777	1825	2.47832	1700	1.94527	1900	1.35196
chrX	64887537	64927537	+	ENST00000360270	ENSG00000147065	MSN	protein_coding	1550	5.85696	1625	5.97636	1625	4.49792	1625	1.97074	NA	NA
chr1	92311787	92351787	-	ENST00000212355	ENSG00000069702	TGFBR3	protein_coding	1525	0.98807	1150	0.642695	NA	NA	NA	NA	NA	NA
chr1	112938803	112978803	+	ENST00000271277	ENSG00000143079	CTTNBP2NL	protein_coding	1525	1.63226	1750	1.9636	1750	2.69369	NA	NA	NA	NA
chr1	116519119	116559119	+	ENST00000369503	ENSG00000163393	SLC22A15	protein_coding	1525	1.54572	1150	1.161	1600	0.742868	1500	1.38464	NA	NA
chr1	165698417	165738417	-	ENST00000367881	ENSG00000143183	TMCO1	protein_coding	1525	1.38116	1525	1.14101	1650	1.93916	1400	1.51717	1725	1.20427
chr1	167190066	167230066	+	ENST00000367866	ENSG00000143190	POU2F1	protein_coding	1525	0.838557	NA	NA	1875	1.06217	1525	2.03232	1975	1.17383
chr1	168066821	168106821	-	ENST00000367835	ENSG00000143147	GPR161	protein_coding	1525	0.677069	NA	NA	1525	0.547282	NA	NA	NA	NA
chr1	171454651	171494651	+	ENST00000392078	ENSG00000117523	PRRC2C	protein_coding	1525	3.98234	1550	1.59329	1725	4.03404	1525	2.44404	1725	3.88278
chr1	206858289	206898289	+	ENST00000294981	ENSG00000162889	MAPKAPK2	protein_coding	1525	4.55666	1525	1.21789	1950	1.97528	1300	1.25015	1900	2.84563
chr1	235451534	235491534	-	ENST00000349213	ENSG00000054267	ARID4B	protein_coding	1525	1.33685	1525	0.629043	1800	1.79188	1525	1.73675	1800	1.92683
chr10	26727132	26767132	+	ENST00000376236	ENSG00000077420	APBB1IP	protein_coding	1525	2.44587	NA	NA	1600	2.01542	NA	NA	NA	NA
chr10	86184695	86224695	+	ENST00000543283	ENSG00000107771	FAM190B	protein_coding	1525	2.44341	250	2.27262	NA	NA	NA	NA	NA	NA
chr10	90639491	90679491	+	ENST00000371926	ENSG00000138134	STAMBPL1	protein_coding	1525	1.16871	NA	NA	NA	NA	NA	NA	NA	NA
chr10	99218513	99258513	-	ENST00000370782	ENSG00000155229	MMS19	protein_coding	1525	1.42689	1150	0.878311	1800	1.62863	475	0.513746	2225	0.998974
chr11	11862970	11902970	+	ENST00000339865	ENSG00000170242	USP47	protein_coding	1525	2.97295	1975	2.1482	1825	3.84702	1825	2.26253	1800	1.04032
chr11	28089855	28129855	-	ENST00000263181	ENSG00000121621	KIF18A	protein_coding	1525	1.80197	NA	NA	1875	2.46288	1600	2.59994	1600	0.734341
chr11	58305693	58345693	-	ENST00000528489	ENSG00000110031	LPXN	protein_coding	1525	3.50902	NA	NA	NA	NA	NA	NA	NA	NA
chr11	71751733	71791733	-	ENST00000393695	ENSG00000137497	NUMA1	protein_coding	1525	1.78274	NA	NA	1900	1.4561	NA	NA	NA	NA
chr11	77492063	77532063	-	ENST00000308488	ENSG00000048649	RSF1	protein_coding	1525	1.79521	1200	0.856963	1725	2.02469	1450	2.34482	1725	1.46934
chr11	82742965	82782965	-	ENST00000534141	ENSG00000137502	RAB30	protein_coding	1525	1.18459	1425	0.575687	NA	NA	NA	NA	1800	1.49923
chr12	48460091	48500091	-	ENST00000549518	ENSG00000079387	SENP1	protein_coding	1525	0.904366	NA	NA	1625	1.2481	1175	1.46021	1800	0.729214
chr12	88934628	88974628	-	ENST00000347404	ENSG00000049130	KITLG	protein_coding	1525	3.89837	1300	1.11314	1875	3.0825	NA	NA	2225	2.52885
chr12	96252747	96292747	+	ENST00000552085	ENSG00000139343	SNRPF	protein_coding	1525	1.56189	1100	0.536907	1675	1.38868	1375	2.04841	1675	1.99718
chr12	97301001	97341001	+	ENST00000266742	ENSG00000139350	NEDD1	protein_coding	1525	1.95315	1500	0.674323	1925	1.42975	1300	1.03337	1950	1.26186
chr12	117348761	117388761	+	ENST00000309909	ENSG00000174989	FBXW8	protein_coding	1525	1.38965	1425	0.52157	1750	1.79825	NA	NA	1775	1.00988
chr13	37454902	37494902	-	ENST00000483941	ENSG00000120693	SMAD9	protein_coding	1525	0.749565	NA	NA	1675	1.10952	NA	NA	NA	NA
chr13	76016250	76056250	-	ENST00000377625	ENSG00000136111	TBC1D4	protein_coding	1525	0.64526	1750	1.05918	NA	NA	NA	NA	NA	NA
chr13	100153671	100193671	+	ENST00000376387	ENSG00000125304	TM9SF2	protein_coding	1525	1.508	1425	0.948501	1825	1.95076	1525	1.20271	NA	NA
chr14	31637010	31677010	-	ENST00000553700	ENSG00000092148	HECTD1	protein_coding	1525	1.79652	NA	NA	1925	3.14089	1400	1.65502	1925	2.14456
chr14	96968710	97008710	+	ENST00000216277	ENSG00000090060	PAPOLA	protein_coding	1525	1.88985	1525	1.22817	NA	NA	1550	1.43208	1600	4.41128
chr14	97263641	97303641	+	ENST00000216639	ENSG00000100749	VRK1	protein_coding	1525	0.887052	NA	NA	1975	1.35328	1925	1.9128	2000	1.72961
chr15	26068870	26108870	-	ENST00000555815	ENSG00000206190	ATP10A	protein_coding	1525	2.87187	1375	1.57091	1700	1.65533	NA	NA	NA	NA
chr15	36871812	36911812	+	ENST00000566621	ENSG00000186073	C15orf41	protein_coding	1525	0.87359	NA	NA	1575	1.86763	NA	NA	NA	NA
chr15	37353504	37393504	-	ENST00000340545	ENSG00000134138	MEIS2	protein_coding	1525	4.31007	1175	1.04934	1975	5.49868	1550	1.73885	NA	NA
chr15	49063338	49103338	-	ENST00000380950	ENSG00000103995	CEP152	protein_coding	1525	0.531561	NA	NA	1800	0.872234	1525	1.23224	NA	NA
chr15	59002177	59042177	-	ENST00000260408	ENSG00000137845	ADAM10	protein_coding	1525	1.62241	1525	0.845623	1725	2.20413	1300	1.29185	1950	0.578572
chr15	64086141	64126141	-	ENST00000561400	ENSG00000103657	HERC1	protein_coding	1525	1.44758	1450	0.888128	1975	1.56337	1975	2.39814	1975	1.48123
chr16	53737875	53777875	+	ENST00000471389	ENSG00000140718	FTO	protein_coding	1525	1.26469	1425	1.10038	2025	1.83919	NA	NA	2025	0.906036
chr17	30469473	30509473	+	ENST00000333942	ENSG00000126858	RHOT1	protein_coding	1525	0.809682	NA	NA	1700	0.658359	1675	1.1277	1775	0.52294
chr17	64148197	64188197	-	ENST00000535342	ENSG00000154240	CEP112	protein_coding	1525	0.719255	NA	NA	1350	0.768611	NA	NA	NA	NA
chr17	76374735	76414735	+	ENST00000262764	ENSG00000087157	PGS1	protein_coding	1525	3.77015	1050	0.637773	1875	1.33325	650	0.550552	1875	2.81748
chr17	79564172	79604172	-	ENST00000331134	ENSG00000182446	NPLOC4	protein_coding	1525	3.25065	1525	0.898218	1725	1.776	775	0.979911	1675	1.96664
chr18	19321281	19361281	+	ENST00000261537	ENSG00000101752	MIB1	protein_coding	1525	1.09774	700	0.578379	1525	1.5056	700	1.32726	2000	1.13478
chr18	33607519	33647519	-	ENST00000357384	ENSG00000141425	RPRD1A	protein_coding	1525	1.38479	NA	NA	NA	NA	1450	1.42914	1825	1.45996
[truncated: 2,088 more rows]
