# Supplementary material for: Rate of elongation by RNA polymerase II is associated with specific gene features and epigenetic modifications
Source: HighWire-hosted journal article supplement (doi:10.1101/gr.171405.113), 2014-04-08
Supplement: Supplemental_Table2.xlsx [file Supplemental_Table2.xlsx]

## Sheet: GENE ENRICHEMENT PATHWAYS
MSigDB Gene Set Name	MSigDB Gene Set Collection	hf1 NES	csb NES	tm NES	K562 NES	mcf7 NES
KEGG_REGULATION_OF_ACTIN_CYTOSKELETON	Curated (KEGG)	1.90369	NS	NS	1.69667	1.67205
KEGG_LEUKOCYTE_TRANSENDOTHELIAL_MIGRATION	Curated (KEGG)	1.71597	NS	NS	1.59482	1.36477
ORGANIC_ACID_METABOLIC_PROCESS	GO (Biological Process)	-1.52293	-1.74868	NS	-1.5747	NS
CARBOXYLIC_ACID_METABOLIC_PROCESS	GO (Biological Process)	-1.54117	-1.74319	NS	-1.55924	NS

## Sheet: REG ACTIN CYTOSKELETON
KEGG_REGULATION_OF_ACTIN_CYTOSKELETON
HF1		K562		MCF-7
Gene Symbol	Core Enrichment	Gene Symbol	Core Enrichment	Gene Symbol	Core Enrichment
ITGA1	Yes	NCKAP1	Yes	TIAM2	Yes
DOCK1	Yes	SOS2	Yes	DOCK1	Yes
ITGA2	Yes	FGF13	Yes	WASF1	Yes
MYH9	Yes	PPP1CB	Yes	WASL	Yes
PPP1CB	Yes	PTK2	Yes	RAF1	Yes
ENAH	Yes	PIP4K2A	Yes	NCKAP1	Yes
FGF2	Yes	ITGB1	Yes	PIK3R3	Yes
DIAPH3	Yes	DIAPH3	Yes	BRAF	Yes
FGD1	Yes	MAPK1	Yes	ITGAV	Yes
BRAF	Yes	WASL	Yes	ACTN4	Yes
WASF2	Yes	IQGAP1	Yes	SOS2	Yes
RAF1	Yes	CDC42	Yes	PAK4	Yes
ROCK1	Yes	VCL	Yes	PTK2	Yes
RHOA	Yes	MSN	Yes	MAP2K1	Yes
VCL	Yes	PIKFYVE	Yes	IQGAP1	Yes
IQGAP1	Yes	PPP1R12A	Yes	ROCK1	Yes
ACTN1	Yes	PAK2	Yes	ITGA2	Yes
GNG12	Yes	MAP2K1	Yes	ENAH	Yes
WASL	Yes	BRAF	Yes	DIAPH3	Yes
CDC42	Yes	RDX	Yes	VAV3	Yes
MAP2K1	Yes	ROCK1	Yes	PAK2	Yes
PIP4K2A	Yes	RHOA	Yes	PXN	No
FN1	Yes	FGF2	No	WASF2	No
MSN	Yes	ARPC1A	No	APC	No
ARPC1A	Yes	ACTN4	No	SCIN	No
WASF1	Yes	ARHGEF12	No	PIK3R1	No
ITGB5	Yes	KRAS	No	PPP1CB	No
NCKAP1	Yes	ITGAV	No	RHOA	No
PAK2	Yes	WASF2	No	ITGB1	No
FGF5	No	MYH9	No	PIP4K2A	No
FGFR1	No	GNA12	No	PIK3CB	No
CYFIP1	No	PIK3CB	No	MAPK1	No
ITGA11	No	PIK3CG	No	ACTN1	No
KRAS	No	EGF	No	CYFIP1	No
PDGFRA	No	PIP5K1B	No	CDC42	No
GNA12	No	MYH10	No	KRAS	No
PDGFC	No	PIK3R3	No	PIKFYVE	No
PIKFYVE	No	IQGAP3	No	VCL	No
MAPK1	No	SLC9A1	No	ARPC1A	No
ACTN4	No	ARHGEF7	No	ABI2	No
PXN	No	RAF1	No	ARHGEF7	No
ARHGEF12	No	PXN	No	FN1	No
GSN	No	SSH2	No	SSH2	No
MYLK	No	PIP5K1A	No	GNA12	No
SOS2	No			SSH1	No
ITGAV	No			FGFR1	No
ITGA6	No			MYH10	No
ITGA4	No			ITGB6	No
ITGB1	No			MYH14	No
PAK4	No
PIK3CB	No
SSH1	No
DIAPH2	No
MRAS	No
SSH2	No
PIP5K1C	No
PDGFRB	No
VAV2	No
EGFR	No
TIAM2	No
IQGAP3	No

## Sheet: LEUK TRANSENDO MIGRATION
KEGG_LEUKOCYTE_TRANSENDOTHELIAL_MIGRATION
HF1		K562		MCF-7
Gene Symbol	Core Enrichment	Gene Symbol	Core Enrichment	Gene Symbol	Core Enrichment
GNAI1	Yes	MLLT4	Yes	GNAI3	Yes
MLLT4	Yes	CTNND1	Yes	PTPN11	Yes
ROCK1	Yes	RAP1B	Yes	PIK3R3	Yes
RHOA	Yes	PTK2	Yes	ACTN4	Yes
VCL	Yes	ITGB1	Yes	PTK2	Yes
RAP1B	Yes	GNAI3	Yes	CTNND1	Yes
GNAI3	Yes	CDC42	Yes	ROCK1	Yes
ACTN1	Yes	VCL	Yes	RAP1B	Yes
CDC42	Yes	MSN	Yes	MAPK14	Yes
MAPK14	Yes	ROCK1	No	VAV3	Yes
MSN	No	RHOA	No	PXN	No
PTPN11	No	RAP1A	No	PIK3R1	No
CXCL12	No	ACTN4	No	OCLN	No
RAP1A	No	ARHGAP5	No	ARHGAP5	No
ACTN4	No	PRKCA	No	RHOA	No
PXN	No	PIK3CB	No	ITGB1	No
ARHGAP5	No	MAPK14	No	PIK3CB	No
ITGA4	No	PIK3CG	No	ACTN1	No
PRKCA	No	PTPN11	No	RAP1A	No
ITGB1	No	CTNNA1	No	CDC42	No
JAM3	No	PIK3R3	No	MLLT4	No
PIK3CB	No	PXN	No	VCL	No
VAV2	No			CXCL12	No
				PRKCA	No

## Sheet: ORG ACID METAB PROCESS
ORGANIC_ACID_METABOLIC_PROCESS
HF1		CSB		K562
Gene Symbol	Core Enrichment	Gene Symbol	Core Enrichment	Gene Symbol	Core Enrichment
GCLC	No	SMS	No	WARS	No
FADS2	No	ME1	No	BCAT1	No
SMS	No	ACOT9	No	HADHB	No
ACO2	No	YARS	No	SMS	No
ACO1	No	DARS	No	DARS	No
SLC6A6	No	GLUD1	Yes	YARS	No
ACOT9	No	ACLY	Yes	FADS2	Yes
GLUD1	No	DDAH1	Yes	SLC6A6	Yes
ME1	No	SLC6A6	Yes	GLUD1	Yes
PPARD	No	PTS	Yes	PNPLA8	Yes
HADHB	No	NPC1	Yes	NPC1	Yes
PNPLA8	No	PNPLA8	Yes	HACL1	Yes
ALDH18A1	No	WARS	Yes	FARS2	Yes
PEPD	No	PLOD1	Yes	ACO2	Yes
MSRA	No	BCAT1	Yes	PTS	Yes
DDAH1	No			PPARD	Yes
GNE	No
FARS2	No
DARS	Yes
ACLY	Yes
PTS	Yes
NPC1	Yes
ACOX3	Yes
WARS	Yes
PLOD1	Yes
QDPR	Yes
BCAT1	Yes

## Sheet: CARB ACID METAB PROCESS
CARBOXYLIC_ACID_METABOLIC_PROCESS
HF1		CSB		K562
Gene Symbol	Core Enrichment	Gene Symbol	Core Enrichment	Gene Symbol	Core Enrichment
GCLC	No	SMS	No	WARS	No
FADS2	No	ME1	No	BCAT1	No
SMS	No	ACOT9	No	HADHB	No
ACO2	No	YARS	No	SMS	No
ACO1	No	DARS	No	DARS	No
SLC6A6	No	GLUD1	Yes	YARS	No
ACOT9	No	ACLY	Yes	FADS2	Yes
GLUD1	No	DDAH1	Yes	SLC6A6	Yes
ME1	No	SLC6A6	Yes	GLUD1	Yes
PPARD	No	PTS	Yes	PNPLA8	Yes
HADHB	No	NPC1	Yes	NPC1	Yes
PNPLA8	No	PNPLA8	Yes	HACL1	Yes
ALDH18A1	No	WARS	Yes	FARS2	Yes
PEPD	No	PLOD1	Yes	ACO2	Yes
MSRA	No	BCAT1	Yes	PTS	Yes
DDAH1	No			PPARD	Yes
GNE	No
FARS2	No
DARS	Yes
ACLY	Yes
PTS	Yes
NPC1	Yes
ACOX3	Yes
WARS	Yes
PLOD1	Yes
QDPR	Yes
BCAT1	Yes
