# Supplementary material for: Rate of elongation by RNA polymerase II is associated with specific gene features and epigenetic modifications
Source: HighWire-hosted journal article supplement (doi:10.1101/gr.171405.113), 2014-04-08
Supplement: Supplemental_Table3.xlsx [file Supplemental_Table3.xlsx]

## Sheet: NF
Chromosome	Start_(elongation_region)	End_(elongation_region)	Ensembl_Transcript_ID	Strand	Ensembl_Gene_ID	Gene_Symbol	Ensembl_Biotype	Elongation_Rate_(bp/min)	GC_Content	Exons	A_Phased_Repeat	Direct_Repeat	G_Quadruplex_Motif	Inverted_Repeat	Mirror_Repeat	Short_Tandem_Repeat	Z_DNA_Motif	DNA	LINE	Low_complexity	LTR	Other	RC	RNA	rRNA	Satellite	scRNA	Simple_repeat	SINE	snRNA	srpRNA	tRNA	Unknown	Dist_to_Downstream_Sense	Dist_to_Upstream_Sense	Dist_to_Downstream_Antisense	Dist_to_Upstream_Antisense	Transcript_Length
chr1	154569224	154600474	ENST00000292205	-	ENSG00000160710	ADAR	protein_coding	3125	0.45184	0.00032	0.00224	0.001344	0.002784	0.036992	0.00688	0.005184	0.00096	0.03888	0.136544	0.002304	0.023264	NA	NA	NA	NA	NA	NA	0.000928	0.167104	NA	NA	NA	NA	29354	296733	118548	346643	45936
chr17	30535321	30563821	ENST00000584852	+	ENSG00000126858	RHOT1	protein_coding	2850	0.390772	0.000175439	0.00368421	0.00284211	0.00133333	0.0347018	0.00263158	0.0109474	NA	0.0380351	0.0940702	0.00515789	0.0130526	NA	NA	NA	NA	NA	NA	NA	0.252982	NA	NA	NA	NA	101900	154802	80138	306592	45072
chr7	143571748	143599248	ENST00000479870	-	ENSG00000198420	FAM115A	protein_coding	2750	0.389236	0.000181818	0.00287273	0.00210909	0.00621818	0.0400364	0.0131636	0.00465455	NA	0.0445818	0.360218	0.00741818	0.0611273	NA	NA	NA	NA	NA	NA	0.00581818	0.0691636	NA	NA	NA	NA	2157295	4905215	471042	4796684	50780
chr1	70671365	70697615	ENST00000370951	+	ENSG00000116754	SRSF11	protein_coding	2625	0.376686	0.000266667	0.00247619	0.00194286	0.00072381	0.0364952	0.00544762	0.00895238	0.0008	0.0466286	0.0300952	0.00118095	NA	NA	NA	NA	NA	NA	NA	0.00620952	0.209638	NA	NA	NA	NA	109127	285365	13319	4	45935
chr7	18535333	18561083	ENST00000413380	+	ENSG00000048052	HDAC9	protein_coding	2575	0.354913	0.000271845	0.00182524	0.00104854	NA	0.0482718	0.0158058	0.00431068	NA	0.0142524	0.0956117	NA	0.0250485	NA	NA	NA	NA	NA	NA	0.00252427	0.077165	NA	NA	NA	NA	2892355	1149558	579757	467847	95834
chr5	134240596	134266096	ENST00000254908	+	ENSG00000132570	PCBD2	protein_coding	2550	0.460078	0.000352941	0.00192157	NA	0.00290196	0.0307059	0.00321569	0.00839216	NA	0.00972549	0.088549	0.00192157	0.0197647	NA	NA	NA	NA	NA	NA	NA	0.239059	NA	NA	NA	NA	22999	3273	82827	272063	56371
chr12	123993015	124018265	ENST00000376874	-	ENSG00000188026	RILPL1	protein_coding	2525	0.503525	0.000118812	NA	0.00578218	0.00582178	0.0411881	NA	0.0079604	NA	0.0220198	0.136673	0.0080396	0.0462574	NA	NA	NA	NA	NA	NA	0.118059	0.344871	NA	NA	NA	NA	57001	87304	27324	50810	62340
chr19	37808813	37833313	ENST00000544914	+	ENSG00000181666	HKR1	protein_coding	2450	0.45498	0.000367347	0.00587755	0.0042449	0.002	0.0337551	0.00938776	0.00902041	0.000408163	0.0513469	0.0357959	0.00110204	0.179265	NA	NA	NA	NA	NA	NA	0.000979592	0.24302	NA	NA	NA	NA	13245	74239	53246	107362	46535
chr20	61545024	61569274	ENST00000395335	-	ENSG00000101191	DIDO1	protein_coding	2425	0.475959	0.000123711	0.00189691	0.000989691	0.00230928	0.0367835	0.00969072	0.00552577	NA	0.0785155	0.0444536	0.00569072	NA	NA	NA	NA	NA	NA	NA	0.016866	0.174763	NA	NA	NA	NA	36159	157570	83922	166	50705
chr6	56692499	56716749	ENST00000520645	-	ENSG00000151914	DST	protein_coding	2425	0.403134	0.000164948	0.00437113	NA	0.00404124	0.0350928	0.0116289	0.00540206	NA	NA	0.0776907	0.0109278	0.0310515	NA	NA	NA	NA	NA	NA	0.00127835	0.134144	NA	NA	NA	NA	169055	336832	2887830	103023	237487
chr4	71570141	71593141	ENST00000503876	+	ENSG00000018189	RUFY3	protein_coding	2300	0.42587	0.000130435	0.00626087	NA	0.00695652	0.0401739	0.00391304	0.00786957	0.000391304	NA	0.0420435	0.00504348	NA	NA	NA	NA	NA	NA	NA	0.0148261	0.255826	NA	NA	NA	NA	157915	13873	71357	2354317	64198
chr5	52083730	52106730	ENST00000282588	+	ENSG00000213949	ITGA1	protein_coding	2300	0.379478	0.000173913	0.00147826	0.00108696	0.000913043	0.0331304	0.0193478	0.00382609	NA	0.0246087	0.0473913	0.002	0.0641304	NA	NA	NA	NA	NA	0.003	0.00382609	0.056	NA	NA	NA	NA	161425	1941374	270164	8526209	168597
chr14	105766900	105789650	ENST00000430725	+	ENSG00000179364	PACS2	protein_coding	2275	0.538769	0.000131868	0.00114286	0.00931868	0.014022	0.0222857	NA	0.00483516	0.000923077	NA	0.155341	0.0134505	0.0516044	NA	NA	NA	NA	NA	NA	0.00720879	0.368264	NA	NA	NA	NA	NA	NA	NA	NA	94109
chr10	128593978	128615978	ENST00000280333	+	ENSG00000150760	DOCK1	protein_coding	2200	0.4955	9.09091e-05	0.001	0.00954545	0.0119545	0.0336364	0.00327273	0.0085	0.000409091	0.0247273	0.0797727	0.0095	0.116727	NA	NA	NA	NA	NA	0.00422727	0.00336364	0.197682	NA	NA	NA	NA	3300660	1051714	1260946	516851	656803
chr1	41157320	41179320	ENST00000467203	+	ENSG00000066136	NFYC	protein_coding	2200	0.423182	0.000318182	0.00109091	0.00372727	NA	0.0289091	0.00718182	0.0102727	NA	0.0426364	0.0259545	0.00195455	NA	NA	NA	NA	NA	NA	NA	NA	0.3095	NA	NA	NA	NA	22706	143479	129407	594178	66800
chr10	45434387	45455137	ENST00000450287	-	ENSG00000224812	TMEM72-AS1	lincRNA	2075	0.428771	0.000144578	0.00125301	0.0086747	0.00216867	0.024241	0.00472289	0.00390361	NA	0.0286265	0.404096	0.0150843	0.0727229	NA	NA	NA	NA	NA	NA	0.00824096	0.0978313	NA	NA	NA	NA	534592	16571	1301785	41135	148665
chr1	155609286	155630036	ENST00000500626	-	ENSG00000246203	RP11-29H23.5	pseudogene	2075	0.455036	0.000192771	0.00616867	0.0013012	NA	0.0244337	0.00949398	0.00375904	NA	NA	NA	NA	0.406795	NA	NA	NA	NA	NA	NA	0.0013012	0.182699	NA	NA	NA	NA	57712	89473	5278	28845	45519
chr12	56200580	56221330	ENST00000546837	-	ENSG00000257390	RP11-762I7.5	protein_coding	2075	0.446747	0.000626506	0.00616867	0.00371084	0.00207229	0.0381687	0.00939759	0.0099759	0.00053012	0.0306506	0.0291566	0.00154217	NA	NA	NA	NA	NA	NA	NA	NA	0.353639	NA	NA	NA	NA	58420	7883	34665	2061	70271
chr17	42180264	42201014	ENST00000393622	-	ENSG00000108840	HDAC5	protein_coding	2075	0.557687	0.000289157	NA	0.0020241	0.0128675	0.043759	0.0131566	0.00804819	0.000963855	0.0296867	0.00337349	NA	NA	NA	NA	NA	NA	NA	NA	0.008	0.129349	NA	NA	NA	NA	16027	52337	7302	18259	46893
chr3	195615205	195635955	ENST00000333602	-	ENSG00000061938	TNK2	protein_coding	2075	0.547325	0.00053012	NA	0.000963855	0.0188434	0.032241	0.00910843	0.00746988	0.0020241	0.0388434	0.143181	0.00746988	NA	NA	NA	NA	NA	NA	NA	0.00154217	0.197494	NA	NA	NA	NA	325731	50836	169587	659769	45720
chr2	85198216	85218716	ENST00000409785	+	ENSG00000176407	KCMF1	protein_coding	2050	0.444049	9.7561e-05	NA	0.00282927	0.00507317	0.0534146	0.00878049	0.0103902	NA	0.0522439	0.134488	0.00970732	NA	NA	NA	NA	NA	NA	NA	0.00326829	0.350098	NA	NA	NA	NA	122366	64417	306924	511630	84344
chr4	80865751	80886251	ENST00000491345	-	ENSG00000163297	ANTXR2	protein_coding	2050	0.338195	4.87805e-05	0.00121951	0.00117073	NA	0.057122	0.00912195	0.00395122	NA	0.00946341	NA	0.0172195	0.0170732	NA	NA	NA	NA	NA	NA	0.00580488	0.0774146	NA	NA	NA	NA	985669	2388215	1012910	220172	57927
chr14	77766977	77787227	ENST00000261534	-	ENSG00000009830	POMT2	protein_coding	2025	0.463111	0.000493827	0.0011358	0.00385185	0.0025679	0.0322963	0.00483951	0.00488889	NA	0.0120494	0.0922963	NA	0.202321	NA	NA	NA	NA	NA	NA	0.0028642	0.18316	NA	NA	NA	NA	252193	20886	163597	2	45928
chr4	148538537	148558787	ENST00000508208	+	ENSG00000164168	TMEM184C	protein_coding	2025	0.373136	0.000493827	NA	NA	0.00123457	0.038716	0.00874074	0.0116049	NA	0.0144691	0.183358	0.00617284	0.0515556	NA	NA	NA	NA	NA	NA	NA	0.167556	NA	NA	NA	NA	74915	72431	2607273	1095414	54658
chr4	15471489	15491739	ENST00000413206	+	ENSG00000048342	CC2D2A	protein_coding	2025	0.412494	0.000345679	0.00237037	0.000987654	0.00138272	0.0339259	0.0289383	0.00414815	0.000444444	0.00449383	0.371062	0.0011358	0.0739753	NA	NA	NA	NA	NA	NA	0.00409877	0.0829136	NA	NA	NA	NA	171862	399712	94517	1842161	131691
chr12	2986389	3006139	ENST00000535226	+	ENSG00000078246	TULP3	protein_coding	1975	0.469468	0.000303797	NA	0.00678481	0.0044557	0.0318987	0.00293671	0.012962	0.000911392	0.0166076	0.116051	NA	NA	NA	NA	NA	NA	NA	NA	0.00465823	0.444354	NA	NA	NA	NA	42088	17428	891637	68	60425
chr13	24144509	24164009	ENST00000248484	+	ENSG00000127863	TNFRSF19	protein_coding	1950	0.412821	0.000153846	0.00379487	0.0045641	0.00548718	0.0476923	0.00282051	0.006	0.000461538	0.0249231	0.102051	0.00661538	NA	NA	NA	NA	NA	NA	NA	0.00153846	0.129282	NA	NA	NA	NA	550351	82906	119818	136668	104519
chr2	29336862	29356362	ENST00000402240	+	ENSG00000115295	CLIP4	protein_coding	1950	0.399538	0.000358974	0.00384615	0.00512821	0.00205128	0.0493333	0.00507692	0.00487179	0.000461538	0.0213846	0.201128	0.00394872	0.130513	NA	NA	NA	NA	0.0054359	NA	NA	0.0952821	NA	NA	NA	NA	992887	165782	2716031	243687	67927
chr12	104680460	104699710	ENST00000503506	+	ENSG00000198431	TXNRD1	protein_coding	1925	0.440156	0.00025974	0.00119481	NA	NA	0.0203636	0.00779221	0.00628571	0.000571429	0.0241558	0.00488312	0.00841558	0.0525714	NA	NA	NA	NA	NA	NA	0.00254545	0.251117	NA	NA	NA	NA	659637	180156	693101	148420	63595
chr1	214776538	214795788	ENST00000366955	+	ENSG00000117724	CENPF	protein_coding	1925	0.446234	0.000571429	0.00254545	0.00264935	0.0137662	0.0447273	0.00581818	0.00394805	0.00161039	0.0158442	0.147273	0.00774026	0.0196883	NA	NA	NA	NA	NA	NA	0.0113247	0.0658182	NA	NA	NA	NA	362346	266061	2787295	51514	61393
chr20	1246960	1266210	ENST00000381873	+	ENSG00000101298	SNPH	protein_coding	1925	0.479117	0.000103896	0.00119481	0.00192208	0.00550649	0.0388571	0.0027013	0.00696104	0.000987013	0.0399481	0.152052	0.00103896	NA	NA	NA	NA	NA	NA	NA	0.0483117	0.167844	NA	NA	NA	NA	19026	98534	62660	613070	43012
chr6	111804744	111823994	ENST00000438298	+	ENSG00000231889	TRAF3IP2-AS1	lincRNA	1925	0.399636	0.000311688	0.00514286	NA	0.00285714	0.0181818	0.0123117	0.00493506	NA	0.0982857	0.0755844	0.00254545	0.0443636	NA	NA	NA	NA	NA	NA	0.00119481	0.224104	NA	NA	NA	NA	563929	214483	35398	330	93619
chr8	11653082	11672332	ENST00000538689	+	ENSG00000079459	FDFT1	protein_coding	1925	0.460571	0.000467532	0.0012987	NA	0.00628571	0.0305455	NA	0.00254545	NA	0.0664416	0.0656623	0.00696104	0.166442	NA	NA	NA	NA	NA	NA	0.00124675	0.173558	NA	NA	NA	NA	1110100	8228	6951	328806	43394
chrX	24167762	24187012	ENST00000539115	+	ENSG00000005889	ZFX	protein_coding	1925	0.405506	0.000415584	0.00488312	0.004	0.00332468	0.0388052	0.00181818	0.00758442	0.00114286	0.068987	0.247948	0.00794805	NA	NA	0.00633766	NA	NA	NA	NA	0.0116364	0.206286	NA	NA	NA	NA	504301	70835	6637796	122459	66610
chr13	42614176	42633176	ENST00000540693	+	ENSG00000102780	DGKH	protein_coding	1900	0.440368	0.000210526	NA	0.00289474	0.00215789	0.0279474	0.0145263	0.00342105	0.00115789	0.0422105	0.0444211	0.0357895	0.0188947	NA	NA	NA	NA	NA	NA	0.0194211	0.143737	NA	NA	NA	NA	192112	569163	807945	78955	189118
chr16	73074597	73093597	ENST00000397992	-	ENSG00000140836	ZFHX3	protein_coding	1900	0.487211	0.000105263	0.00405263	0.00126316	0.0136842	0.0208421	0.007	0.00794737	NA	NA	0.00289474	0.0278947	NA	NA	NA	NA	NA	NA	NA	0.0355789	0.0202632	NA	NA	NA	NA	925382	1272706	906786	1237075	276813
chr5	52285156	52304156	ENST00000296585	+	ENSG00000164171	ITGA2	protein_coding	1900	0.388053	0.000105263	0.00126316	0.00521053	NA	0.0211053	0.0149474	0.00384211	0.000578947	0.0346316	0.195368	0.00547368	0.0711579	NA	NA	NA	NA	NA	NA	0.00752632	0.0785789	0.00331579	NA	NA	NA	451107	35671	68738	8727635	105453
chr10	31607424	31626174	ENST00000488625	+	ENSG00000148516	ZEB1	protein_coding	1875	0.380907	0.00048	0.00256	0.00133333	0.00245333	0.0389867	0.00122667	0.00341333	0.00106667	0.00549333	0.31328	0.0203733	NA	NA	NA	NA	NA	NA	NA	0.00928	0.0570133	NA	NA	NA	NA	1087616	856662	447800	286558	210706
chr13	30406071	30424821	ENST00000380680	-	ENSG00000122042	UBL3	protein_coding	1875	0.379573	5.33333e-05	0.00512	0.00426667	0.00096	0.0336	0.0191467	0.0107733	0.000533333	0.0804267	0.262293	0.0141867	0.0258667	NA	NA	NA	NA	NA	NA	0.0118933	0.132587	NA	NA	NA	NA	214996	351945	1131728	767008	86313
chr5	148912257	148931007	ENST00000377843	-	ENSG00000113712	CSNK1A1	protein_coding	1875	0.427467	0.000213333	0.00128	NA	0.00101333	0.0211733	0.00314667	0.0130133	NA	0.0728	0.0405867	0.00330667	NA	NA	NA	NA	NA	NA	NA	0.00677333	0.321813	NA	NA	NA	NA	448270	441678	78608	409292	56162
chr6	47445525	47464275	ENST00000359314	+	ENSG00000198087	CD2AP	protein_coding	1875	0.372533	0.000106667	0.00512	0.00256	NA	0.0331733	0.00501333	0.00906667	NA	0.0845867	0.0437333	0.00666667	0.03152	NA	NA	NA	NA	NA	0.00517333	0.00389333	0.16224	NA	NA	NA	NA	1945570	1926706	360238	167845	149474
chr6	53391177	53409927	ENST00000229416	-	ENSG00000001084	GCLC	protein_coding	1875	0.42176	5.33333e-05	0.00250667	0.00154667	0.00272	0.0347733	0.0226667	0.00474667	0.000693333	0.0362667	0.113547	0.00346667	NA	NA	NA	NA	NA	NA	NA	0.00330667	0.159627	NA	NA	NA	NA	155950	2912857	404257	249850	47788
chr1	206809073	206827573	ENST00000489878	+	ENSG00000143479	DYRK3	protein_coding	1850	0.413622	0.000216216	NA	0.00351351	0.00243243	0.0311892	NA	0.00356757	NA	NA	0.115892	0.00183784	NA	NA	NA	NA	NA	NA	NA	0.00189189	0.194054	NA	NA	NA	NA	9291	138850	368120	23169	48691
chr12	114827747	114846247	ENST00000310346	-	ENSG00000089225	TBX5	protein_coding	1850	0.500324	0.000432432	0.0012973	NA	0.00589189	0.031027	0.0105946	0.00616216	0.00156757	NA	0.00805405	0.0263243	NA	NA	NA	NA	NA	NA	NA	0.00783784	0.0439459	NA	NA	NA	NA	402071	261811	930166	2502513	54511
chr1	23345941	23364441	ENST00000356634	+	ENSG00000004487	KDM1A	protein_coding	1850	0.400973	0.000162162	NA	0.00135135	0.00243243	0.0285405	0.00654054	0.00767568	0.000486486	0.0249189	0.117676	0.00464865	NA	NA	NA	NA	NA	NA	NA	0.00681081	0.235297	NA	NA	NA	NA	309522	488291	24574	1082191	64241
chr15	73907975	73926475	ENST00000351217	-	ENSG00000156642	NPTN	protein_coding	1850	0.386216	0.000108108	NA	NA	0.00691892	0.0222703	0.0114054	0.00654054	0.000594595	0.0440541	0.00302703	0.0131351	NA	NA	NA	NA	NA	NA	NA	NA	0.113946	NA	NA	NA	NA	810349	283333	855658	50146	74120
chr1	67390578	67409078	ENST00000355977	+	ENSG00000198160	MIER1	protein_coding	1850	0.375297	0.000378378	0.0012973	0.00664865	0.00178378	0.0566486	0.00113514	0.00735135	0.000756757	0.0171351	0.0344865	0.0109189	NA	NA	NA	NA	NA	NA	NA	0.00389189	0.0943243	NA	NA	NA	NA	720281	145848	34436	8	63724
chr4	108534460	108552960	ENST00000514815	-	ENSG00000138801	PAPSS1	protein_coding	1850	0.368919	0.000108108	0.00556757	0.00313514	NA	0.0340541	0.0141081	0.00335135	NA	0.107405	0.111135	0.0102703	0.0632432	NA	NA	NA	NA	NA	NA	0.00102703	0.0459459	NA	NA	NA	NA	1275099	415740	1242579	192760	41527
chr4	114664583	114683083	ENST00000454265	-	ENSG00000145349	CAMK2D	protein_coding	1850	0.365189	0.000162162	0.00405405	0.00189189	0.0047027	0.0401622	0.00691892	0.00518919	0.00102703	NA	0.0938919	0.0119459	NA	NA	NA	NA	NA	NA	NA	0.00183784	0.112378	NA	NA	NA	NA	1084932	138356	1064341	4516833	310895
chr4	120531646	120550146	ENST00000354960	-	ENSG00000138735	PDE5A	protein_coding	1850	0.391568	0.000162162	0.00124324	0.00140541	0.00664865	0.0280541	0.00935135	0.00891892	0.000540541	0.0175135	0.0514595	0.0107568	0.0488649	NA	NA	NA	NA	NA	NA	0.0168108	0.0964865	NA	NA	NA	NA	284546	430432	89399	2172325	134596
chr6	108260893	108279393	ENST00000369002	-	ENSG00000025796	SEC63	protein_coding	1850	0.430216	0.000216216	0.0012973	0.00151351	0.00232432	0.0177297	0.00691892	0.00783784	0.0012973	0.0848649	0.128378	0.00254054	0.0263784	0.0597297	NA	NA	NA	NA	NA	0.00335135	0.26773	NA	NA	NA	NA	458614	83219	866846	336704	90433
chr10	1095478	1113728	ENST00000358220	+	ENSG00000047056	WDR37	protein_coding	1825	0.431781	0.000164384	0.00394521	NA	0.0049863	0.0287671	0.0116164	0.00876712	0.000547945	0.12411	0.213151	NA	0.042411	NA	NA	NA	NA	NA	NA	NA	0.20126	NA	NA	NA	NA	1974233	31770	2044440	417	82759
chr10	86088342	86106592	ENST00000359979	+	ENSG00000107771	FAM190B	protein_coding	1825	0.404603	5.47945e-05	0.00542466	0.00279452	0.00312329	0.0345205	0.0132055	0.00526027	NA	NA	0.125753	0.0128767	0.0677808	0.0030137	NA	NA	NA	NA	NA	0.00339726	0.184219	NA	NA	NA	NA	2388053	175031	2066670	4123014	45419
chr11	66886740	66904990	ENST00000398645	+	ENSG00000173120	KDM2A	protein_coding	1825	0.451562	0.000109589	0.00509589	0.00350685	0.00142466	0.0231233	0.00460274	0.0136438	NA	0.0282192	0.0603288	0.00936986	NA	NA	NA	NA	NA	NA	NA	0.00723288	0.462411	NA	NA	NA	NA	107164	47252	192278	160893	138396
chr1	246729746	246747996	ENST00000483271	+	ENSG00000162852	CNST	protein_coding	1825	0.403671	5.47945e-05	0.004	0.0010411	0.00120548	0.021589	0.00569863	0.00482192	NA	0.0323836	0.0274521	0.00706849	NA	NA	NA	NA	NA	NA	NA	NA	0.265589	NA	NA	NA	NA	117631	863318	232655	181	81791
chr13	41885341	41903591	ENST00000379367	+	ENSG00000172766	NAA16	protein_coding	1825	0.38789	0.000438356	0.00673973	0.00345205	NA	0.0460274	NA	0.00920548	0.000657534	0.0145205	0.0900822	0.0069589	NA	NA	NA	NA	NA	NA	NA	NA	0.254192	NA	NA	NA	NA	106200	227202	215619	47628	51579
chr14	73525144	73543394	ENST00000261973	+	ENSG00000119707	RBM25	protein_coding	1825	0.426904	0.000438356	0.00136986	0.00142466	0.00147945	0.034411	0.00164384	0.0116164	NA	0.00542466	0.0876712	0.00372603	NA	NA	NA	NA	NA	NA	NA	0.00487671	0.416877	NA	0.0142466	NA	NA	37998	98787	176773	31224	62978
chr15	80351910	80370160	ENST00000261749	+	ENSG00000086666	ZFAND6	protein_coding	1825	0.377863	0.000273973	0.00394521	0.00405479	0.00619178	0.0255342	0.00558904	0.0103014	NA	0.0412603	0.113863	0.00723288	NA	NA	NA	NA	NA	NA	NA	0.00416438	0.182795	NA	NA	NA	NA	53322	134714	876184	135814	78825
chr21	38739236	38757486	ENST00000462274	+	ENSG00000157540	DYRK1A	protein_coding	1825	0.418356	5.47945e-05	0.00394521	0.00284932	0.00136986	0.0305205	0.0116712	0.00871233	0.000493151	0.00789041	0.109479	0.026411	0.064	NA	NA	NA	NA	NA	NA	0.0140274	0.155233	NA	NA	NA	NA	1398612	146343	1768147	99403	119547
chr2	215656178	215674428	ENST00000260947	-	ENSG00000138376	BARD1	protein_coding	1825	0.390849	0.000164384	0.00252055	0.00279452	NA	0.0414795	0.00208219	0.00646575	NA	0.102192	0.111397	0.00147945	0.0766027	NA	NA	NA	NA	NA	NA	0.00191781	0.154685	NA	NA	NA	NA	1618095	550750	4149829	502250	84058
chr22	36765813	36784063	ENST00000216181	-	ENSG00000100345	MYH9	protein_coding	1825	0.51189	5.47945e-05	0.00279452	0.0049863	0.0134247	0.0255342	0.00783562	0.00739726	0.000767123	NA	0.0556164	0.0106301	0.0209863	NA	NA	NA	NA	NA	NA	0.00323288	0.34411	NA	NA	NA	NA	108063	79029	679607	631638	106736
chr8	125366683	125384933	ENST00000297632	-	ENSG00000164983	TMEM65	protein_coding	1825	0.40937	5.47945e-05	0.00569863	0.00268493	0.00213699	0.028	0.00958904	0.00679452	NA	0.0218082	0.0493699	0.0070137	0.270795	NA	NA	NA	NA	NA	NA	NA	0.193644	NA	NA	NA	NA	791440	115801	517243	78114	60702
chr10	43633934	43651934	ENST00000374466	+	ENSG00000169826	CSGALNACT2	protein_coding	1800	0.382222	0.000111111	0.00394444	0.00538889	NA	0.0255	0.014	0.00972222	NA	0.0210556	0.214944	0.00366667	0.0553333	NA	NA	NA	NA	NA	NA	0.005	0.189389	NA	NA	NA	NA	258639	303549	207130	499942	46822
chr1	165796768	165814768	ENST00000367879	+	ENSG00000143179	UCK2	protein_coding	1800	0.451111	0.000111111	0.00127778	0.00127778	0.00394444	0.0307778	0.00244444	0.00538889	0.00138889	0.0727778	0.0725	0.00472222	0.0767778	NA	NA	NA	NA	NA	NA	0.00455556	0.226222	NA	NA	NA	NA	971955	171396	988980	58633	80578
chr15	83858770	83876770	ENST00000299633	-	ENSG00000166503	RP11-382A20.3	protein_coding	1800	0.381556	0.000111111	0.00911111	0.00166667	0.00266667	0.0382222	0.00122222	0.0095	NA	0.0537222	0.229389	0.00422222	0.0501111	NA	NA	NA	NA	NA	NA	0.0065	0.108	NA	NA	NA	NA	100664	47884	177347	1267478	69954
chr2	162164549	162182549	ENST00000409682	+	ENSG00000115233	PSMD14	protein_coding	1800	0.368389	0.000166667	0.00138889	0.00166667	NA	0.0586111	0.0202778	0.00455556	NA	0.107833	0.0856667	0.00866667	0.0470556	NA	NA	NA	NA	NA	NA	0.00144444	0.175278	NA	NA	NA	NA	7108285	71866	644205	814231	103679
chr2	64353588	64371588	ENST00000358912	-	ENSG00000197329	PELI1	protein_coding	1800	0.366667	0.000166667	0.00272222	NA	0.00388889	0.0502778	0.025	0.00644444	NA	0.0735	0.0777778	0.00688889	NA	NA	NA	NA	NA	NA	NA	0.002	0.104222	NA	NA	NA	NA	85374	487166	212892	309738	51802
chr4	129730779	129748779	ENST00000226319	+	ENSG00000077684	PHF17	protein_coding	1800	0.452944	0.000277778	0.00266667	NA	0.00361111	0.0120556	0.005	0.0133889	0.00266667	0.0342222	0.00644444	0.00794444	0.0286111	NA	NA	NA	NA	NA	NA	0.00983333	0.223167	NA	NA	NA	NA	244049	598490	34372	520795	65600
chr5	178754431	178772431	ENST00000251582	-	ENSG00000087116	ADAMTS2	protein_coding	1800	0.551889	0.000111111	NA	NA	0.00827778	0.0305	0.00544444	0.00438889	0.00188889	0.0358333	0.0952778	0.031	0.0660556	NA	NA	NA	NA	NA	NA	0.0205556	0.112444	NA	NA	NA	NA	574728	268747	224740	205139	234579
chr6	137095656	137113656	ENST00000359015	-	ENSG00000197442	MAP3K5	protein_coding	1800	0.417278	5.55556e-05	NA	NA	0.00161111	0.0352778	0.005	0.00827778	0.00105556	0.0373333	0.0551667	0.00522222	0.0213333	NA	NA	NA	NA	NA	NA	0.00161111	0.184556	NA	NA	NA	NA	462667	404964	556947	30045	235471
chr6	37787275	37805275	ENST00000287218	+	ENSG00000156639	ZFAND3	protein_coding	1800	0.420333	0.000111111	0.00266667	0.00611111	0.00877778	0.0264444	0.00466667	0.00833333	NA	0.0190556	0.175611	0.0137778	NA	NA	NA	NA	NA	NA	NA	0.00222222	0.149167	NA	0.0182222	NA	NA	1932883	337991	308951	319575	335125
chr8	54792444	54810444	ENST00000518286	+	ENSG00000147509	RGS20	protein_coding	1800	0.451111	0.000166667	0.0015	NA	0.00877778	0.0497222	0.0171667	0.00905556	0.001	0.0333889	0.133444	NA	NA	NA	NA	NA	NA	NA	NA	0.003	0.179889	NA	NA	NA	NA	215336	5817990	46671	36594	74258
chr8	61429416	61447416	ENST00000262646	+	ENSG00000104388	RAB2A	protein_coding	1800	0.417833	5.55556e-05	0.00138889	0.00422222	0.00311111	0.023	0.0162222	0.00783333	NA	0.00983333	0.0841667	0.011	0.09	NA	NA	NA	NA	NA	NA	0.0115556	0.229444	NA	NA	NA	NA	2611704	1933997	943698	1397649	106770
chr9	18473892	18491892	ENST00000380548	+	ENSG00000178031	ADAMTSL1	protein_coding	1800	0.387444	5.55556e-05	0.00666667	NA	0.00144444	0.0296667	0.00355556	0.00266667	NA	0.0464444	0.0416667	0.00972222	0.0239444	NA	NA	NA	NA	NA	NA	0.00327778	0.0801111	NA	NA	NA	NA	59411	676770	539248	1603106	437056
chr11	12132138	12149888	ENST00000256194	+	ENSG00000133816	MICAL2	protein_coding	1775	0.485521	0.000169014	0.0028169	0.00129577	0.00405634	0.0300845	0.00940845	0.00732394	0.0016338	0.055831	0.129746	0.00112676	NA	NA	NA	NA	NA	NA	NA	0.00140845	0.12462	NA	NA	NA	NA	136308	151266	1237417	101221	153194
chr11	35160417	35178167	ENST00000263398	+	ENSG00000026508	CD44	protein_coding	1775	0.456789	5.6338e-05	NA	0.00428169	0.00614085	0.0184789	0.0035493	0.00743662	NA	0.00822535	0.0458592	NA	0.028	NA	NA	NA	NA	NA	NA	0.00107042	0.140056	NA	NA	NA	NA	439317	142742	72334	222478	93532
chr11	61583728	61601478	ENST00000257261	+	ENSG00000134824	FADS2	protein_coding	1775	0.504845	0.00056338	NA	0.0011831	0.00828169	0.0233239	0.0116056	0.00597183	0.000676056	0.008	0.0787042	NA	NA	NA	NA	NA	NA	NA	NA	0.00653521	0.229352	NA	NA	NA	NA	93627	19014	17269	1016	51098
chr1	180974297	180992047	ENST00000258301	-	ENSG00000135823	STX6	protein_coding	1775	0.411437	0.000112676	0.00129577	0.00259155	0.00552113	0.0434366	0.00625352	0.00771831	0.00056338	0.134197	0.1	NA	0.0303662	NA	NA	NA	NA	NA	NA	NA	0.20293	NA	NA	NA	NA	480025	1358791	36808	10513	50186
chr12	100518876	100536626	ENST00000279907	-	ENSG00000111647	UHRF1BP1L	protein_coding	1775	0.411887	0.000112676	0.00394366	0.00174648	NA	0.0349296	0.0028169	0.0126197	NA	0.0483944	0.0997183	0.00619718	0.0255211	NA	NA	NA	NA	NA	NA	0.0162817	0.253521	NA	NA	NA	NA	1458037	1250276	1367415	57947	105772
chr1	25071848	25089598	ENST00000374379	+	ENSG00000169504	CLIC4	protein_coding	1775	0.446366	5.6338e-05	0.00140845	0.00214085	0.00394366	0.0250704	0.00185915	0.00980282	NA	NA	0.126761	0.00794366	0.0221408	NA	NA	NA	NA	NA	NA	0.00377465	0.411606	NA	NA	NA	NA	552940	72076	436918	242998	98967
chr12	54379629	54397379	ENST00000513209	+	ENSG00000172789	HOXC5	protein_coding	1775	0.549746	0.000957746	0.00287324	NA	0.0279437	0.0342535	0.015831	0.00738028	0.00321127	NA	NA	0.0143662	NA	NA	NA	NA	NA	NA	NA	0.00467606	NA	NA	NA	NA	NA	2564	9426	154512	17114	49043
chr12	66217911	66235661	ENST00000403681	+	ENSG00000149948	HMGA2	protein_coding	1775	0.400901	0.000225352	0.00135211	0.00540845	0.0091831	0.0379718	0.00501408	0.00766197	0.00157746	NA	0.0318873	0.0141408	0.0242817	NA	NA	NA	NA	NA	NA	0.0138592	0.0652394	NA	NA	NA	NA	438444	357224	258937	1064685	142164
chr13	47127303	47145053	ENST00000311191	+	ENSG00000136141	LRCH1	protein_coding	1775	0.430366	5.6338e-05	0.00135211	0.00433803	0.00287324	0.0413521	0.0215775	0.00422535	0.00129577	0.0339718	0.024169	0.00383099	0.0224789	NA	NA	NA	NA	NA	NA	0.00659155	0.164282	NA	NA	NA	NA	1444399	1016470	178087	500409	198407
chr14	75625584	75643334	ENST00000303575	-	ENSG00000170348	TMED10	protein_coding	1775	0.429859	5.6338e-05	0.00338028	NA	0.00388732	0.0267042	0.0127887	0.0145915	0.00056338	0.0145915	0.186423	0.0143099	0.0399437	NA	NA	NA	NA	NA	NA	0.00253521	0.30507	NA	NA	NA	NA	9556	473898	127040	102146	45161
chr17	73384040	73401790	ENST00000316615	-	ENSG00000177885	GRB2	protein_coding	1775	0.443662	0.000338028	NA	0.00107042	0.00264789	0.0291831	0.0263662	0.0102535	0.000619718	0.0233239	0.0336901	NA	NA	NA	NA	NA	NA	NA	NA	0.00512676	0.34862	NA	NA	NA	NA	76260	94551	91814	50873	87633
chr18	46969967	46987717	ENST00000583353	-	ENSG00000141627	DYM	protein_coding	1775	0.424901	0.000169014	0.00135211	0.00135211	NA	0.023831	0.00411268	0.00664789	NA	NA	0.0942535	NA	0.236507	NA	NA	NA	NA	NA	NA	NA	0.116056	NA	NA	NA	NA	371579	19830	558131	352675	82688
chr18	74534563	74552313	ENST00000320610	+	ENSG00000130856	ZNF236	protein_coding	1775	0.435211	0.000169014	0.00552113	0.00123944	0.00461972	0.0234366	0.00721127	0.00839437	0.0011831	0.0522817	0.388394	0.0147042	0.00456338	NA	NA	NA	NA	NA	NA	NA	0.278423	NA	NA	NA	NA	2254833	1532662	3087856	312	147311
chr2	173940163	173957913	ENST00000539448	+	ENSG00000091436	AC013461.1	protein_coding	1775	0.406873	0.00028169	0.00298592	0.00349296	0.00523944	0.0541408	0.0215211	0.00602817	0.00101408	0.0771268	0.116507	0.00478873	0.0197183	NA	NA	NA	NA	NA	NA	0.00439437	0.101634	NA	NA	NA	NA	239397	476301	791023	972685	146769
chr2	225889412	225907162	ENST00000435582	-	ENSG00000135905	DOCK10	protein_coding	1775	0.416958	5.6338e-05	NA	0.004	NA	0.0216338	NA	0.00507042	0.00101408	0.00833803	0.0452958	0.0044507	0.0753239	NA	NA	NA	NA	NA	NA	0.00709859	0.105521	NA	NA	NA	NA	417052	1688870	1034731	1793508	148897
chr3	43645810	43663560	ENST00000292246	-	ENSG00000160746	ANO10	protein_coding	1775	0.401014	0.000225352	0.00416901	0.0063662	0.00270423	0.0352113	0.00405634	0.00619718	NA	0.0995493	0.181915	NA	0.0225352	NA	NA	NA	NA	NA	NA	0.00839437	0.154704	NA	NA	NA	NA	475995	817701	230926	68814	256220
chr4	102251685	102269435	ENST00000529324	-	ENSG00000138814	PPP3CA	protein_coding	1775	0.416113	0.000169014	0.00270423	0.00157746	0.00478873	0.0311549	0.00805634	0.00614085	0.00304225	0.0244507	0.0964507	0.00247887	NA	NA	NA	NA	NA	NA	NA	0.0163944	0.0980282	NA	NA	NA	NA	1117780	1283207	1355815	1153050	249860
chr4	129997014	130014764	ENST00000434680	-	ENSG00000151466	SCLT1	protein_coding	1775	0.386197	0.000169014	0.00276056	0.00270423	0.00321127	0.0393239	0.0165634	0.00692958	NA	NA	0.0802254	0.00439437	0.166085	NA	NA	NA	NA	NA	NA	0.00174648	0.0843944	NA	NA	NA	NA	764780	5102724	178385	64	209612
chr6	18247304	18265054	ENST00000397239	-	ENSG00000124795	DEK	protein_coding	1775	0.403324	0.000394366	0.00140845	0.00270423	0.00230986	0.0459718	0.00180282	0.00985915	0.00101408	0.10231	0.0183099	0.00535211	0.0609014	NA	NA	NA	NA	NA	NA	0.00495775	0.202986	NA	NA	NA	NA	69680	1835880	970	122526	40955
chr6	75898017	75915767	ENST00000322507	-	ENSG00000111799	COL12A1	protein_coding	1775	0.382028	0.000450704	0.00304225	0.00112676	0.00557746	0.0298592	0.0123944	0.00383099	0.0016338	0.0262535	0.0397183	0.0149859	NA	NA	NA	NA	NA	NA	NA	0.00642254	0.0552676	NA	NA	NA	NA	1512030	31623	1337726	78962	121725
chr7	132749098	132766848	ENST00000457942	-	ENSG00000106554	CHCHD3	protein_coding	1775	0.399211	0.000112676	0.00394366	NA	0.00371831	0.0230423	0.00816901	0.00332394	0.00112676	0.0157183	0.104732	0.00416901	NA	NA	NA	NA	NA	NA	NA	0.0016338	0.151887	NA	NA	NA	NA	1485472	1207241	1545450	170974	46339
chr7	152115340	152133090	ENST00000262189	-	ENSG00000055609	MLL3	protein_coding	1775	0.424676	5.6338e-05	NA	0.00107042	0.00411268	0.0304225	0.0023662	0.0096338	0.00101408	0.00676056	0.133859	0.0125634	0.0491268	NA	NA	NA	NA	NA	NA	0.0044507	0.313408	NA	NA	NA	NA	518774	210496	273663	28118	301080
chr7	27778992	27796742	ENST00000543117	+	ENSG00000106052	TAX1BP1	protein_coding	1775	0.387775	0.00028169	0.00394366	0.00135211	0.000957746	0.0343662	0.0139155	0.00405634	0.00056338	0.0586479	0.0455211	0.00878873	0.0541408	NA	NA	NA	NA	NA	NA	0.00123944	0.148225	NA	NA	NA	NA	2248984	532862	51200	76372	89720
chr7	79763814	79781564	ENST00000490206	+	ENSG00000127955	GNAI1	protein_coding	1775	0.393521	0.000225352	0.00698592	0.0028169	0.00225352	0.0272113	0.00146479	0.00456338	NA	0.019662	0.103662	0.0113803	0.10231	NA	NA	NA	NA	NA	NA	0.00467606	0.0562817	NA	NA	NA	NA	6977862	2176993	568039	680924	54734
chr8	38222040	38239790	ENST00000316985	-	ENSG00000147548	WHSC1L1	protein_coding	1775	0.396113	0.000169014	0.00135211	0.00123944	0.00794366	0.0335211	0.00507042	0.0150423	0.00157746	0.0103099	0.0636056	0.0151549	NA	NA	NA	NA	NA	NA	NA	0.00529577	0.308056	NA	NA	NA	NA	73052	28865	79503	4168	65855
chr8	41891755	41909505	ENST00000396930	-	ENSG00000083168	KAT6A	protein_coding	1775	0.407831	0.000225352	0.00152113	0.00152113	0.00394366	0.0265915	0.015493	0.0084507	0.00056338	0.0286197	0.00766197	0.0192676	NA	NA	NA	NA	NA	NA	NA	0.00523944	0.220732	NA	NA	NA	NA	115225	122730	386985	100958	122508
chrX	123094062	123111812	ENST00000394477	+	ENSG00000101972	STAG2	protein_coding	1775	0.427718	0.000394366	0.00383099	0.00394366	0.00726761	0.0327324	0.0168451	0.0122817	0.000507042	0.0376901	0.00670423	0.00619718	NA	NA	NA	NA	NA	NA	NA	0.00422535	0.319775	NA	NA	NA	NA	5540189	46233	5446415	227158	70836
chr10	91461367	91478867	ENST00000394289	+	ENSG00000138182	KIF20B	protein_coding	1750	0.3484	0.000685714	0.00571429	0.00691429	0.00342857	0.0325143	0.0032	0.0106857	NA	0.0334286	0.1592	0.00862857	0.0298286	NA	NA	NA	NA	NA	NA	0.00337143	0.169029	NA	NA	NA	NA	1130341	280608	1170489	56038	64836
chr10	94353043	94370543	ENST00000260731	+	ENSG00000138160	KIF11	protein_coding	1750	0.407086	0.0004	0.00542857	NA	0.00137143	0.0225143	0.00942857	0.00702857	NA	0.0298286	0.2164	0.00445714	NA	NA	NA	NA	NA	NA	NA	0.00708571	0.358114	NA	NA	NA	NA	56637	239322	673142	19191	62107
chr11	13298199	13315699	ENST00000529050	+	ENSG00000133794	ARNTL	protein_coding	1750	0.462686	0.000171429	0.00131429	0.00171429	0.00685714	0.0412571	0.00125714	0.00422857	NA	0.00914286	0.0798286	0.00748571	0.0232571	NA	NA	NA	NA	NA	NA	0.0156	0.147371	NA	NA	NA	NA	352006	331915	71356	1267282	77725
chr11	85763424	85780924	ENST00000528398	-	ENSG00000073921	PICALM	protein_coding	1750	0.401429	0.000228571	NA	0.00125714	0.00354286	0.0411429	0.00451429	0.00885714	0.000571429	0.0478857	0.179029	0.00925714	0.0210286	NA	NA	NA	NA	NA	NA	0.00525714	0.178857	NA	NA	NA	NA	218746	371225	373327	174881	111042
chr11	9406169	9423669	ENST00000379719	+	ENSG00000205339	IPO7	protein_coding	1750	0.427429	0.000114286	NA	0.00434286	NA	0.0245143	0.00748571	0.00942857	NA	0.0316	0.112514	0.00988571	NA	NA	NA	NA	NA	NA	NA	0.00131429	0.399829	NA	NA	NA	NA	4143	464543	34933	69854	63504
chr12	106516311	106533811	ENST00000261402	-	ENSG00000074590	NUAK1	protein_coding	1750	0.487486	5.71429e-05	0.00274286	0.0048	0.00708571	0.0283429	0.00657143	0.00662857	NA	0.0343429	0.0914286	0.00594286	NA	NA	NA	NA	NA	NA	NA	0.00222857	0.188743	NA	NA	NA	NA	863803	97847	728515	162769	76693
chr12	118793250	118810750	ENST00000392533	-	ENSG00000135090	TAOK3	protein_coding	1750	0.419714	0.000171429	NA	0.00171429	0.00525714	0.0332	0.0136571	0.0116571	NA	0.014	0.0391429	0.0064	NA	NA	NA	NA	NA	NA	NA	0.00411429	0.287029	NA	NA	NA	NA	228940	1312844	187360	3607	223144
chr1	240255180	240272680	ENST00000319653	+	ENSG00000155816	FMN2	protein_coding	1750	0.419886	5.71429e-05	0.0028	0.00148571	0.00108571	0.0350857	0.0243429	0.00977143	NA	0.0242286	0.0649143	0.00428571	NA	NA	NA	NA	NA	NA	NA	0.00977143	0.158	NA	NA	NA	NA	1716312	3187899	357692	3487339	383309
chr12	76936089	76953589	ENST00000261183	-	ENSG00000091039	OSBPL8	protein_coding	1750	0.384629	5.71429e-05	0.0076	0.00422857	0.00154286	0.0385714	0.00605714	0.00268571	NA	0.0795429	0.0970857	0.0012	0.0128571	NA	NA	NA	NA	NA	NA	NA	0.1652	NA	NA	NA	NA	171367	298906	1017873	204264	208009
chr14	102430865	102448365	ENST00000360184	+	ENSG00000197102	DYNC1H1	protein_coding	1750	0.427314	0.000342857	0.00148571	0.0048	0.00188571	0.0470857	0.00925714	0.00942857	NA	0.0218286	0.0790857	0.00297143	NA	NA	NA	NA	NA	NA	NA	0.00131429	0.294457	NA	NA	NA	NA	135323	36537	76209	1588185	86263
chr14	50981827	50999327	ENST00000013125	-	ENSG00000012983	MAP4K5	protein_coding	1750	0.409657	0.000171429	0.00628571	0.00542857	0.00394286	0.0307429	0.0110857	0.00725714	NA	NA	0.249429	0.00445714	NA	NA	NA	NA	NA	NA	NA	0.0064	0.217371	NA	NA	NA	NA	96710	101032	166381	707558	114084
chr15	77694986	77712486	ENST00000560626	-	ENSG00000173517	PEAK1	protein_coding	1750	0.394914	5.71429e-05	0.00285714	0.0072	0.00937143	0.0246857	0.0161143	0.00508571	NA	0.0380571	0.281771	0.0169714	NA	NA	NA	NA	NA	NA	NA	0.0165714	0.159543	NA	NA	NA	NA	154740	573088	429885	756	311986
chr1	65713902	65731402	ENST00000463018	+	ENSG00000116675	DNAJC6	protein_coding	1750	0.434686	0.000171429	NA	0.00194286	0.00377143	0.0412	0.0107429	0.0114857	NA	0.0149143	0.245143	0.0028	NA	NA	NA	NA	NA	NA	NA	0.00868571	0.247257	NA	NA	NA	NA	132228	414988	1524669	189711	117975
chr17	29421945	29439445	ENST00000358273	+	ENSG00000196712	NF1	protein_coding	1750	0.410514	0.000114286	0.00554286	0.00148571	0.00971429	0.0198857	0.0048	0.0108571	NA	NA	0.0990286	0.0201143	NA	NA	NA	NA	NA	NA	NA	0.0048	0.306	0.00228571	NA	NA	NA	425069	95016	168842	188659	282750
chr17	80477589	80495089	ENST00000473637	+	ENSG00000141568	FOXK2	protein_coding	1750	0.479886	5.71429e-05	0.00125714	0.00268571	0.00508571	0.0328	0.00182857	0.0105714	0.00154286	0.0733714	0.0789143	0.0137143	NA	NA	NA	NA	NA	NA	NA	0.00731429	0.380914	NA	NA	NA	NA	156992	31446	54848	68882	82679
chr18	43753988	43771488	ENST00000282059	+	ENSG00000152242	C18orf25	protein_coding	1750	0.445429	5.71429e-05	NA	0.00285714	0.00194286	0.0335429	0.0106857	0.0096	0.000628571	NA	0.0488571	0.0012	0.0117143	NA	NA	NA	NA	NA	NA	0.00371429	0.4456	NA	NA	NA	NA	2271438	45689	596034	69789	92966
chr21	33086931	33104431	ENST00000434667	-	ENSG00000156304	SCAF4	protein_coding	1750	0.399371	5.71429e-05	0.008	0.00142857	0.00468571	0.0457714	0.0124	0.00508571	NA	0.111314	0.0692571	0.00222857	0.0259429	NA	NA	NA	NA	NA	NA	0.00702857	0.204571	NA	NA	NA	NA	2618421	536098	23188	661010	61118
chr2	28974614	28992114	ENST00000358506	+	ENSG00000213639	PPP1CB	protein_coding	1750	0.4092	5.71429e-05	0.00428571	0.00114286	0.002	0.0275429	NA	0.00674286	0.000628571	0.218514	0.110857	0.0104571	NA	NA	NA	NA	NA	NA	NA	NA	0.2164	NA	NA	NA	NA	19085	337098	58073	860633	51182
chr2	36583069	36600569	ENST00000280527	+	ENSG00000150938	CRIM1	protein_coding	1750	0.429486	0.000114286	0.00622857	0.00377143	0.00537143	0.0347429	NA	0.0088	0.00257143	0.00897143	0.0322857	0.0132	NA	NA	NA	NA	NA	NA	NA	0.00542857	0.0548	NA	NA	NA	NA	300763	2793271	156334	356	195209
chr2	65339740	65357240	ENST00000409784	-	ENSG00000138069	RAB1A	protein_coding	1750	0.423086	5.71429e-05	0.00297143	NA	0.00354286	0.0427429	0.00257143	0.0108571	NA	0.00417143	NA	0.00645714	0.0225143	NA	NA	NA	NA	NA	NA	0.00251429	0.432286	NA	NA	NA	NA	436194	180744	3098	97588	43251
chr4	170174756	170192256	ENST00000284637	-	ENSG00000154447	SH3RF1	protein_coding	1750	0.412571	0.000228571	0.00411429	0.00165714	0.00708571	0.0429143	0.00645714	0.00742857	0.000914286	0.0318857	0.0749714	0.0157714	0.0218286	NA	NA	NA	NA	NA	NA	0.00645714	0.118686	NA	NA	NA	NA	220788	122164	302648	349415	176849
chr5	95280275	95297775	ENST00000237853	-	ENSG00000118985	ELL2	protein_coding	1750	0.4096	0.000114286	0.00131429	0.00662857	0.00725714	0.0312571	0.0101143	0.00662857	0.000571429	NA	0.102971	0.00537143	NA	NA	NA	NA	NA	NA	NA	0.0130857	0.0810286	NA	NA	NA	NA	99198	798738	125704	117066	76973
chr6	158402888	158420388	ENST00000367121	+	ENSG00000078269	SYNJ2	protein_coding	1750	0.480971	5.71429e-05	0.00137143	0.0052	0.006	0.0257143	NA	0.00594286	NA	0.0384571	0.167657	NA	0.0765143	NA	NA	NA	NA	NA	NA	0.0036	0.145429	NA	NA	NA	NA	146490	36779	87647	657635	112154
chr8	38758753	38776253	ENST00000420274	+	ENSG00000169499	PLEKHA2	protein_coding	1750	0.478171	0.000171429	0.00137143	0.00302857	0.00834286	0.0214286	0.00491429	0.0115429	NA	NA	0.128229	0.0092	0.0220571	NA	NA	NA	NA	NA	NA	0.0300571	0.2076	NA	NA	NA	NA	32914	48207	47573	299978	72675
chr8	54917589	54935089	ENST00000521604	-	ENSG00000187735	TCEA1	protein_coding	1750	0.413886	0.000171429	0.00268571	0.00674286	0.00445714	0.0422286	0.00497143	0.00811429	0.000514286	0.0825143	0.170743	0.0101714	NA	NA	NA	NA	NA	NA	NA	0.0028	0.321714	NA	0.0028	NA	NA	139239	23848	23226	112691	55973
chr9	36470045	36487545	ENST00000488058	-	ENSG00000137075	RNF38	protein_coding	1750	0.460514	5.71429e-05	NA	0.00154286	0.00645714	0.0326857	0.0064	0.00982857	0.000628571	0.0316571	0.0435429	0.00891429	NA	NA	NA	NA	NA	NA	NA	0.0028	0.406457	NA	NA	NA	NA	46350	950554	235486	85359	111540
chr1	171694137	171711387	ENST00000236192	-	ENSG00000117533	VAMP4	protein_coding	1725	0.390725	0.000173913	0.00788406	0.00376812	NA	0.0493333	0.0161739	0.00637681	0.00057971	0.0433623	0.242319	0.0066087	0.0766957	NA	NA	NA	NA	NA	NA	0.00626087	0.192928	NA	NA	NA	NA	1627508	396336	108737	39373	42087
chr1	225823594	225840844	ENST00000366844	-	ENSG00000154380	ENAH	protein_coding	1725	0.394609	5.7971e-05	0.00278261	NA	0.00515942	0.036	0.00428986	0.00852174	0.00168116	NA	0.0757681	0.00521739	0.0772174	NA	NA	NA	NA	NA	NA	0.0022029	0.214957	NA	NA	NA	NA	184287	192388	872595	124670	160306
chr1	247224863	247242113	ENST00000474541	-	ENSG00000135747	ZNF670	protein_coding	1725	0.437217	5.7971e-05	0.00150725	NA	NA	0.0390725	0.0109565	0.00782609	NA	0.0191884	0.200406	0.00185507	0.139014	NA	NA	NA	NA	NA	NA	0.00284058	0.195826	NA	NA	NA	NA	30718	21150	247325	1890416	111149
chr12	65672423	65689673	ENST00000308259	+	ENSG00000174099	MSRB3	protein_coding	1725	0.401913	0.000231884	0.00544928	0.00144928	0.00197101	0.0165217	0.00597101	0.00857971	NA	0.0103188	0.130493	0.00191304	NA	NA	NA	NA	NA	NA	NA	0.00614493	0.194261	NA	NA	NA	NA	505816	30282	439377	519197	188264
chr12	72666463	72683713	ENST00000261180	+	ENSG00000072657	TRHDE	protein_coding	1725	0.378725	0.000289855	0.00446377	0.00162319	NA	0.0454493	0.0310145	0.00678261	NA	0.0717101	0.102435	0.00776812	NA	NA	NA	NA	NA	NA	NA	0.00371014	0.0649275	NA	NA	NA	NA	2225087	345834	3184955	608714	392959
chr13	111348700	111365950	ENST00000535398	-	ENSG00000134905	CARS2	protein_coding	1725	0.477275	0.00057971	0.00266667	0.0104928	0.0143188	0.0205797	0.00307246	0.00718841	0.00208696	NA	0.0328696	0.00469565	0.0791884	NA	NA	NA	NA	NA	NA	0.00185507	0.213565	NA	NA	NA	NA	111879	150383	33608	401673	69647
chr13	114549796	114567046	ENST00000357389	-	ENSG00000183087	GAS6	protein_coding	1725	0.538841	0.000289855	0.0013913	0.0035942	0.00689855	0.0292754	0.0044058	0.00933333	0.00243478	0.0174493	NA	0.0057971	NA	NA	NA	NA	NA	NA	NA	0.119362	0.015942	NA	NA	NA	NA	382023	180147	231258	103	43522
chr15	65134082	65151332	ENST00000502574	+	ENSG00000249240	AC069368.3	protein_coding	1725	0.529681	0.000173913	NA	0.00463768	0.0167536	0.0263768	0.00863768	0.00689855	NA	0.0444638	0.0423768	0.00121739	NA	NA	NA	NA	NA	NA	NA	0.00521739	0.220812	NA	NA	NA	NA	30018	155816	81280	16244	80598
chr15	85923818	85941068	ENST00000559362	+	ENSG00000170776	AKAP13	protein_coding	1725	0.408638	0.000173913	0.00823188	0.00173913	NA	0.0283478	0.00881159	0.00544928	NA	0.00666667	0.203362	0.00452174	NA	NA	NA	NA	NA	NA	NA	0.00486957	0.200696	0.00347826	NA	NA	NA	3046865	241442	338740	664144	304287
chr17	40152465	40169715	ENST00000457167	-	ENSG00000168259	DNAJC7	protein_coding	1725	0.450783	0.000463768	NA	0.00330435	0.00156522	0.0297391	NA	0.0103188	NA	0.0157101	NA	NA	NA	NA	NA	0.00324638	NA	NA	NA	0.00376812	0.360058	NA	NA	NA	NA	54443	83706	12047	269849	41276
chr2	190027355	190044605	ENST00000374866	-	ENSG00000204262	COL5A2	protein_coding	1725	0.36742	5.7971e-05	0.0026087	0.00556522	NA	0.0561739	0.00115942	0.0118261	NA	0.0150725	0.0730435	0.0173913	0.0271884	NA	NA	NA	NA	NA	NA	0.00817391	0.113391	NA	NA	NA	NA	6768	566780	127133	261553	147983
chr2	191745553	191762803	ENST00000320717	+	ENSG00000115419	GLS	protein_coding	1725	0.374783	0.000231884	NA	0.00481159	0.00347826	0.0364638	0.0174493	0.00428986	NA	0.0466667	0.0813913	0.0121739	0.00417391	NA	NA	NA	NA	NA	NA	0.00272464	0.138493	NA	NA	NA	NA	324553	188061	48208	346085	84725
chr2	191861726	191878976	ENST00000361099	-	ENSG00000115415	STAT1	protein_coding	1725	0.412232	0.00057971	0.00150725	0.00417391	0.00591304	0.0437101	0.00892754	0.00173913	NA	0.0764638	0.137159	0.00626087	0.0424348	NA	NA	NA	NA	NA	NA	NA	0.0572754	NA	NA	NA	NA	439508	5119330	9200	231130	45216
chr2	231577560	231594810	ENST00000258418	+	ENSG00000135932	CAB39	protein_coding	1725	0.429855	0.000173913	0.00272464	0.00173913	0.00307246	0.0375652	0.0122899	0.00765217	0.00104348	0.0164638	0.0722319	0.0121159	0.00950725	NA	NA	NA	NA	NA	NA	0.00568116	0.274029	NA	NA	NA	NA	112060	167243	701898	487116	108230
chr22	36407223	36424473	ENST00000438146	-	ENSG00000100320	RBFOX2	protein_coding	1725	0.422667	5.7971e-05	0.00272464	0.00655072	0.00255072	0.0266667	0.008	0.0053913	0.00173913	0.0026087	0.141101	0.00452174	0.0224928	NA	NA	NA	NA	NA	NA	0.00492754	0.18429	NA	NA	NA	NA	2068057	197781	320017	991228	284221
chr22	46067678	46084928	ENST00000381061	+	ENSG00000130638	ATXN10	protein_coding	1725	0.426551	0.000115942	NA	0.00481159	NA	0.0252754	NA	0.00742029	0.00104348	0.0429565	0.282319	0.0195942	0.0277681	NA	NA	NA	NA	NA	NA	NA	0.168638	NA	NA	NA	NA	48725	70664	328108	431028	173506
chr2	37176365	37193615	ENST00000263918	-	ENSG00000115808	STRN	protein_coding	1725	0.410203	0.000115942	0.00150725	0.00649275	0.00144928	0.0416812	0.0193623	0.00591304	NA	0.0511304	0.161391	0.00614493	NA	NA	NA	NA	NA	NA	NA	0.00411594	0.258957	0.00388406	NA	NA	NA	328283	14537	111678	117978	122832
chr2	9753893	9771143	ENST00000238081	-	ENSG00000134308	YWHAQ	protein_coding	1725	0.409681	0.000289855	NA	0.00127536	0.00266667	0.0303768	0.00788406	0.00985507	0.000521739	0.0246377	0.180754	0.0111884	NA	NA	NA	NA	NA	NA	0.00602899	NA	0.170667	NA	NA	NA	NA	35226	425782	102552	212427	47042
chr3	160150367	160167617	ENST00000483754	-	ENSG00000248710	RP11-432B6.3	protein_coding	1725	0.378899	0.000347826	0.00637681	0.00150725	0.00394203	0.0321159	0.0281739	0.0035942	NA	0.0224348	0.0709565	0.00394203	0.0462029	NA	NA	NA	NA	NA	NA	NA	0.19942	NA	NA	NA	NA	10297	45165	5004	771481	222376
chr3	192618700	192635950	ENST00000392452	-	ENSG00000180611	MB21D2	protein_coding	1725	0.450551	5.7971e-05	0.00133333	NA	0.00486957	0.0421449	0.00475362	0.0104928	0.00110145	0.0426667	0.029913	NA	0.0245217	NA	NA	NA	NA	NA	NA	0.00255072	0.276522	NA	NA	NA	NA	2755724	1440025	1479491	674982	121346
chr3	30647994	30665244	ENST00000295754	+	ENSG00000163513	TGFBR2	protein_coding	1725	0.408464	0.000115942	0.00515942	0.00347826	0.00185507	0.0371014	0.00892754	0.00828986	0.00057971	0.0654493	0.0366377	0.00121739	NA	NA	NA	NA	NA	NA	NA	0.00771014	0.161797	NA	NA	NA	NA	886496	596108	1014322	2257376	87632
chr3	33318517	33335767	ENST00000498807	+	ENSG00000153558	FBXL2	protein_coding	1725	0.40858	0.000231884	0.00133333	NA	0.00626087	0.0274203	0.0150145	0.00689855	NA	NA	0.583072	0.00423188	NA	NA	NA	NA	NA	NA	NA	0.0017971	0.145681	NA	NA	NA	NA	481548	129252	71311	179823	96270
chr4	106067032	106084282	ENST00000305737	+	ENSG00000168769	TET2	protein_coding	1725	0.390087	0.000173913	0.00144928	0.00475362	0.00423188	0.0412754	0.0151304	0.00753623	0.00110145	NA	0.044	0.0253333	NA	NA	NA	NA	NA	NA	NA	0.00388406	0.169217	NA	NA	NA	NA	522908	2253069	183201	1947466	96896
chr4	3076408	3093658	ENST00000355072	+	ENSG00000197386	HTT	protein_coding	1725	0.42771	0.000115942	0.0013913	0.00110145	0.00515942	0.0242319	0.00666667	0.00956522	NA	0.0423188	0.199768	0.00197101	0.0257391	NA	0.0129855	NA	NA	NA	NA	0.0133333	0.295188	0.00347826	NA	NA	NA	134358	123614	388915	111290	169268
chr5	132387654	132404904	ENST00000304858	+	ENSG00000170606	HSPA4	protein_coding	1725	0.439072	0.000173913	0.00144928	0.0017971	NA	0.0191884	0.0145507	0.00846377	NA	0.0236522	0.0701449	0.00115942	NA	NA	NA	NA	NA	NA	NA	0.00475362	0.333449	NA	NA	NA	NA	1022747	183118	863543	25414	54487
chr5	14143811	14161061	ENST00000502816	+	ENSG00000038382	TRIO	protein_coding	1725	0.460174	5.7971e-05	0.00631884	0.00318841	0.0201159	0.0297391	0.00127536	0.00585507	0.000521739	0.00411594	0.132232	0.0022029	NA	NA	NA	NA	NA	NA	NA	0.0175072	0.119942	NA	NA	NA	NA	398079	3485883	521097	3382424	147185
chr6	101311998	101329248	ENST00000324696	-	ENSG00000112249	ASCC3	protein_coding	1725	0.37687	0.000173913	0.0026087	0.00313043	NA	0.0281739	0.034029	0.00707246	NA	0.0411594	0.12058	0.00678261	0.0867826	NA	NA	NA	NA	NA	NA	NA	0.0794203	NA	NA	NA	NA	377697	3846719	1308189	517612	234084
chr6	117803820	117821070	ENST00000368503	+	ENSG00000164465	DCBLD1	protein_coding	1725	0.395188	0.000173913	0.00498551	NA	NA	0.0529855	0.00475362	0.00533333	0.00104348	0.049971	0.0746667	0.00405797	0.0233043	NA	NA	NA	NA	NA	NA	0.00672464	0.136754	NA	NA	NA	NA	152796	740790	37612	716934	65782
chr6	161412759	161430009	ENST00000366919	+	ENSG00000085511	MAP3K4	protein_coding	1725	0.376406	5.7971e-05	0.00208696	0.00469565	NA	0.0377391	0.00324638	0.00365217	0.000637681	0.0485217	0.102783	0.00886957	0.115942	NA	NA	NA	NA	NA	NA	0.00486957	0.102029	NA	NA	NA	0.0066087	2382915	833009	98297	1202024	125658
chr6	168227602	168244852	ENST00000400825	+	ENSG00000130396	MLLT4	protein_coding	1725	0.38858	5.7971e-05	0.00417391	0.00144928	0.00927536	0.0306667	0.00910145	0.00991304	0.000521739	0.054087	0.0822029	0.021971	0.0175072	NA	NA	NA	NA	NA	NA	0.00805797	0.0484638	NA	NA	NA	NA	1834654	773536	1348272	816202	53450
chr6	34343201	34360451	ENST00000358797	-	ENSG00000112664	NUDT3	protein_coding	1725	0.441449	5.7971e-05	0.00144928	0.00533333	0.00115942	0.0267246	0.00411594	0.0137971	NA	0.10742	0.0186087	NA	0.030087	NA	NA	NA	NA	NA	NA	0.00568116	0.337797	NA	NA	NA	NA	103547	24779	106443	364419	104454
chr7	129710350	129727600	ENST00000335420	+	ENSG00000128607	KLHDC10	protein_coding	1725	0.416522	5.7971e-05	0.00133333	0.00121739	0.00643478	0.0374493	0.0237681	0.00718841	0.000521739	0.0281739	0.279768	0.0147826	NA	NA	NA	NA	NA	NA	NA	0.00376812	0.310783	NA	NA	NA	0.00492754	182623	313428	54204	19117	63246
chr8	11141925	11159175	ENST00000221086	+	ENSG00000104643	MTMR9	protein_coding	1725	0.374841	0.000289855	0.00347826	0.00127536	0.000985507	0.0269565	0.00863768	0.00892754	NA	0.0542609	0.339652	0.00933333	NA	NA	NA	NA	NA	NA	NA	0.0296812	0.109855	NA	NA	NA	NA	6569	855524	97047	83050	43721
chr1	213224589	213241589	ENST00000543470	+	ENSG00000136643	RPS6KC1	protein_coding	1700	0.395706	5.88235e-05	0.00558824	0.00352941	NA	0.033	0.00958824	0.00829412	NA	0.0324118	0.178294	0.00305882	0.0749412	NA	NA	NA	NA	NA	NA	0.00270588	0.256882	NA	NA	NA	NA	1189975	151884	1257449	35421	221538
chr1	243401650	243418650	ENST00000522995	-	ENSG00000143702	CEP170	protein_coding	1700	0.405235	0.000176471	0.00794118	0.00152941	0.00164706	0.0361765	0.0158824	0.00647059	NA	0.00447059	0.112353	0.00417647	NA	NA	NA	NA	NA	NA	NA	0.00517647	0.269706	NA	NA	NA	NA	1574949	232884	1325409	656	43453
chr12	45609770	45626770	ENST00000426898	+	ENSG00000177119	ANO6	protein_coding	1700	0.422647	0.000176471	0.00276471	0.00170588	0.00235294	0.0300588	0.0113529	0.00447059	NA	NA	0.0562941	0.00352941	0.0561765	NA	NA	NA	NA	NA	NA	0.00835294	0.190235	NA	NA	NA	NA	473849	826229	469732	28518	205230
chr1	36396319	36413319	ENST00000324350	+	ENSG00000126070	EIF2C3	protein_coding	1700	0.394059	0.000176471	0.00423529	NA	0.00317647	0.0353529	0.005	0.00941176	NA	NA	0.211765	0.00388235	NA	NA	NA	NA	NA	NA	NA	0.00152941	0.267588	NA	NA	NA	NA	118133	6420	165853	160768	52691
chr13	97873688	97890688	ENST00000397601	+	ENSG00000139793	MBNL2	protein_coding	1700	0.422294	0.000117647	0.00735294	0.00111765	0.00241176	0.0283529	NA	0.00729412	NA	0.0229412	0.0648824	0.00135294	NA	NA	NA	NA	NA	NA	NA	0.00864706	0.0584706	NA	NA	NA	NA	172786	1426445	1188766	1167952	172686
chr16	84733584	84750584	ENST00000219473	+	ENSG00000103194	USP10	protein_coding	1700	0.448647	0.000235294	0.002	0.00476471	0.00323529	0.0302941	0.00252941	0.00647059	0.000529412	0.00476471	0.0464118	0.00552941	0.0218824	NA	NA	NA	NA	NA	NA	0.00805882	0.212176	NA	NA	NA	NA	80002	37668	234482	81915	79603
chr20	48313415	48330415	ENST00000371711	-	ENSG00000158470	B4GALT5	protein_coding	1700	0.431882	5.88235e-05	0.00141176	0.003	0.00764706	0.0264706	0.00252941	0.0128824	0.000529412	0.039	0.0194706	NA	0.0345294	NA	NA	NA	NA	NA	NA	0.00805882	0.260706	NA	NA	NA	NA	395659	189513	393106	98834	80933
chr2	169312372	169329372	ENST00000305747	+	ENSG00000172292	CERS6	protein_coding	1700	0.416647	5.88235e-05	0.00647059	0.00123529	NA	0.0248235	0.00535294	0.006	0.00111765	0.0102353	0.0747647	0.00435294	0.0212353	NA	NA	NA	NA	NA	NA	0.0114118	0.126529	NA	NA	NA	NA	87080	7044146	375028	208267	319272
chr2	198282815	198299815	ENST00000335508	-	ENSG00000115524	SF3B1	protein_coding	1700	0.405882	0.000235294	0.00488235	0.00176471	0.00294118	0.0305882	0.00982353	0.00964706	NA	0.00670588	0.0736471	0.00429412	NA	NA	0.0184118	NA	NA	NA	NA	0.003	0.307824	NA	NA	NA	NA	84294	51492	662285	18415	43117
chr22	30279144	30296144	ENST00000401950	+	ENSG00000100330	MTMR3	protein_coding	1700	0.407588	0.000117647	0.00147059	0.00388235	0.00147059	0.0532353	0.00247059	0.00958824	NA	0.0832941	0.0736471	0.00470588	NA	NA	NA	NA	NA	NA	NA	0.0134118	0.287471	0.00611765	NA	NA	NA	433482	112742	317297	44851	144725
chr2	235860617	235877617	ENST00000392011	+	ENSG00000130147	SH3BP4	protein_coding	1700	0.497059	0.000117647	0.00158824	NA	0.00705882	0.0311176	0.00111765	0.00617647	0.00135294	0.0296471	0.0524706	0.0112941	NA	NA	NA	NA	NA	NA	NA	0.000235294	0.163529	NA	NA	NA	NA	502115	1479874	1173689	454924	103741
chr2	64229567	64246567	ENST00000483277	-	ENSG00000143952	VPS54	protein_coding	1700	0.389	5.88235e-05	0.0101765	NA	0.00294118	0.0418824	0.00770588	0.009	NA	0.0717647	0.156294	0.0108235	NA	NA	NA	NA	NA	NA	NA	0.0233529	0.206176	NA	NA	NA	NA	390700	73218	87871	434759	126261
chr3	172412008	172429008	ENST00000538775	-	ENSG00000144959	NCEH1	protein_coding	1700	0.425412	0.000117647	0.00447059	NA	0.00158824	0.0433529	0.0193529	0.00694118	NA	0.0288235	0.132706	NA	0.0464118	NA	NA	NA	NA	NA	NA	0.00258824	0.295118	0.00588235	NA	NA	NA	860724	4309533	270516	43289	80573
chr4	123747863	123764863	ENST00000264498	+	ENSG00000138685	FGF2	protein_coding	1700	0.409118	0.000117647	0.00688235	0.00152941	0.00211765	0.0243529	0.00411765	0.00105882	NA	0.0715882	0.135765	0.00476471	0.0807059	NA	NA	NA	NA	NA	NA	0.00758824	0.0454706	NA	NA	NA	NA	56361	81765	25935	956211	71528
chr4	54215242	54232242	ENST00000401642	-	ENSG00000184178	SCFD2	protein_coding	1700	0.412765	0.000117647	0.00147059	0.00817647	NA	0.0268824	0.0135294	0.00647059	NA	NA	0.102353	0.00641176	0.162412	NA	NA	NA	NA	NA	NA	NA	0.217647	NA	NA	NA	NA	666740	619423	611937	11577	493093
chr5	56111401	56128401	ENST00000399503	+	ENSG00000095015	MAP3K1	protein_coding	1700	0.414	5.88235e-05	0.00141176	0.00394118	0.00158824	0.0572353	0.0153529	0.00617647	NA	0.0210588	0.0677059	0.0100588	NA	NA	NA	NA	NA	NA	NA	0.00347059	0.123118	NA	NA	NA	NA	53685	1389992	64027	820580	80578
chr5	72921983	72938983	ENST00000296794	+	ENSG00000214944	RP11-428C6.1	protein_coding	1700	0.397118	0.000117647	0.00158824	0.00147059	0.00176471	0.0441176	0.00629412	0.00629412	0.000529412	0.0621765	0.0942941	0.003	NA	NA	NA	NA	NA	NA	NA	0.00182353	0.121529	NA	NA	NA	NA	1018985	44189	961250	60472	285539
chr6	118956710	118973710	ENST00000483035	-	ENSG00000111860	CEP85L	protein_coding	1700	0.408941	0.000176471	0.00552941	0.00429412	0.00264706	0.0239412	0.0143529	0.00682353	NA	0.0244706	0.144882	0.00776471	0.0278824	NA	NA	NA	NA	NA	NA	0.00258824	0.178235	NA	NA	NA	NA	1010005	160901	901824	241530	87512
chr6	130014370	130031370	ENST00000275189	-	ENSG00000146376	ARHGAP18	protein_coding	1700	0.402059	5.88235e-05	0.00582353	0.00370588	NA	0.0297059	0.00829412	0.0117647	NA	0.0261765	0.0415882	0.00358824	0.0184118	NA	NA	NA	NA	NA	NA	NA	0.201294	NA	NA	NA	NA	1149500	1129117	153660	308357	133129
chr6	18387581	18404581	ENST00000259939	+	ENSG00000137393	RNF144B	protein_coding	1700	0.400529	0.000235294	0.00141176	0.00229412	NA	0.0232941	0.0161176	0.00664706	0.00117647	0.0236471	0.0594706	0.002	0.0255882	NA	NA	NA	NA	NA	NA	NA	0.130882	0.00617647	NA	NA	NA	1410035	163497	1673353	122782	81524
chr6	87865267	87882267	ENST00000369577	+	ENSG00000188994	ZNF292	protein_coding	1700	0.389647	0.000117647	0.00135294	0.00294118	0.00264706	0.0362941	0.00335294	0.00829412	NA	0.0354706	0.0218824	0.00117647	0.0271176	NA	NA	NA	NA	NA	NA	0.0103529	0.226529	NA	NA	NA	NA	127038	1659758	318828	1476816	108647
chr7	148564413	148581413	ENST00000483012	-	ENSG00000106462	EZH2	protein_coding	1700	0.409529	0.000176471	NA	0.00335294	0.00429412	0.0179412	0.0216471	0.00964706	NA	0.0524706	0.124647	0.0137059	0.0605882	NA	NA	NA	NA	NA	NA	0.00647059	0.283412	NA	NA	NA	NA	4942135	118740	43211	242094	66284
chr8	101305555	101322555	ENST00000341084	-	ENSG00000034677	RNF19A	protein_coding	1700	0.388353	0.000235294	0.00441176	NA	0.00282353	0.0215294	0.0256471	0.00441176	0.000529412	0.0471176	0.149824	0.00664706	0.0485882	NA	NA	NA	NA	NA	NA	NA	0.132	NA	NA	NA	NA	124456	210444	28423	2710692	52985
chr8	142138720	142155720	ENST00000424248	+	ENSG00000105339	DENND3	protein_coding	1700	0.498235	0.000352941	0.00152941	NA	0.00288235	0.0245294	0.005	0.00435294	0.00164706	0.00911765	0.0872353	NA	0.0671176	NA	NA	NA	NA	NA	NA	NA	0.195824	NA	NA	NA	NA	1602808	611468	42149	127308	67175
chr9	129089128	129106128	ENST00000361171	+	ENSG00000196814	FAM125B	protein_coding	1700	0.491235	0.000176471	NA	0.00170588	0.00311765	0.0265294	NA	0.00482353	0.000588235	0.0437647	0.0884706	0.0133529	NA	NA	NA	NA	NA	NA	NA	0.0114118	0.146529	NA	NA	NA	NA	438156	359473	720499	619615	180192
chr9	21542668	21559668	ENST00000304425	-	ENSG00000171889	MIR31HG	lincRNA	1700	0.358176	5.88235e-05	0.00735294	0.00164706	0.00111765	0.0425882	0.00635294	0.00405882	NA	0.0541176	0.0475882	0.0114706	0.0201765	NA	NA	NA	NA	NA	NA	0.00429412	0.0392353	NA	NA	NA	NA	7484	408082	523714	242966	104027
chr9	36036430	36053430	ENST00000377966	+	ENSG00000122707	RECK	protein_coding	1700	0.392588	0.000117647	0.00435294	0.00129412	NA	0.0357647	0.00517647	0.0134118	0.00111765	0.0257647	0.343588	0.00776471	0.0431765	NA	NA	NA	NA	NA	NA	0.0120588	0.0780588	NA	NA	NA	NA	60311	129292	138008	78279	88018
chr9	6413151	6430151	ENST00000468435	+	ENSG00000147854	UHRF2	protein_coding	1700	0.412941	0.000352941	0.00152941	0.00152941	NA	0.0400588	0.00135294	0.00664706	0.000529412	0.0127059	0.145294	0.003	0.0287059	NA	NA	NA	NA	NA	NA	0.00329412	0.282824	NA	NA	NA	NA	267711	636595	1343339	397511	93903
chrX	24028303	24045303	ENST00000328046	-	ENSG00000174010	KLHL15	protein_coding	1700	0.44	0.000117647	0.00152941	0.00152941	0.0107647	0.0233529	0.0192941	0.00923529	NA	0.0257647	0.0489412	0.0171176	NA	NA	NA	NA	NA	NA	NA	0.00523529	0.334647	NA	NA	NA	NA	243896	6800255	200976	27761	43466
chr10	65281123	65297873	ENST00000373758	+	ENSG00000165476	REEP3	protein_coding	1675	0.397851	5.97015e-05	0.00161194	0.00495522	0.0041194	0.0229254	0.0080597	0.0079403	NA	0.0215522	0.243104	0.000238806	NA	NA	NA	NA	NA	NA	NA	0.00226866	0.230746	NA	NA	NA	NA	1264161	54801	4360532	55401	103760
chr10	76871229	76887979	ENST00000372690	+	ENSG00000156671	SAMD8	protein_coding	1675	0.424597	0.000179104	NA	0.00262687	0.00519403	0.0352239	0.0213134	0.0123582	NA	NA	0.0703881	0.00441791	NA	NA	NA	NA	NA	NA	NA	0.0103881	0.391343	NA	NA	NA	NA	58682	78590	82499	960403	65360
chr11	107879459	107896209	ENST00000393094	+	ENSG00000166266	CUL5	protein_coding	1675	0.411761	5.97015e-05	0.00131343	0.00435821	NA	0.0315224	0.00913433	0.00752239	NA	0.111582	0.098806	NA	0.0371343	NA	NA	NA	NA	NA	NA	0.004	0.280597	NA	NA	NA	NA	72798	1910040	108659	442998	99044
chr1	114338348	114355098	ENST00000261441	-	ENSG00000081019	RSBN1	protein_coding	1675	0.383761	0.000238806	0.00429851	0.00179104	NA	0.0252537	0.00423881	0.0118806	0.000716418	0.0644179	0.193672	0.0041194	NA	NA	NA	NA	NA	NA	0.0079403	0.00973134	0.204179	NA	NA	NA	NA	13321	82578	86553	92816	50644
chr11	73882144	73898894	ENST00000328257	+	ENSG00000214517	PPME1	protein_coding	1675	0.386627	0.000119403	0.00459701	0.00137313	0.00131343	0.0317612	0.018806	0.00489552	0.000597015	0.0724179	0.0788657	NA	0.0340299	NA	NA	NA	NA	NA	NA	NA	0.25409	NA	NA	NA	NA	381484	243365	280778	80	83604
chr1	185014496	185031246	ENST00000367510	+	ENSG00000121481	RNF2	protein_coding	1675	0.404179	0.000119403	NA	0.00208955	0.00107463	0.0315224	0.00495522	0.0081194	NA	0.0701493	0.062209	0.00292537	0.0114627	NA	NA	NA	NA	NA	NA	0.00925373	0.211582	NA	NA	NA	NA	71695	416341	32721	70814	57244
chr12	110417444	110434194	ENST00000338373	-	ENSG00000139436	GIT2	protein_coding	1675	0.428597	0.000537313	0.00423881	NA	0.00161194	0.0257313	0.0133134	0.0038806	0.000716418	0.0509851	0.0541493	0.00316418	NA	NA	NA	NA	NA	NA	NA	0.00125373	0.331104	NA	NA	NA	NA	75901	44788	38320	3040	66587
chr1	227489425	227506175	ENST00000366769	-	ENSG00000143776	CDC42BPA	protein_coding	1675	0.369612	5.97015e-05	NA	0.00149254	0.00310448	0.0352239	0.0172537	0.00907463	NA	0.054209	0.157373	0.0149254	0.0223881	NA	NA	NA	NA	NA	NA	0.00137313	0.111701	NA	NA	NA	NA	539299	412714	290929	245044	328609
chr12	69864129	69880879	ENST00000299293	+	ENSG00000166225	FRS2	protein_coding	1675	0.392537	0.000179104	0.00585075	0.00292537	0.00728358	0.029194	0.0292537	0.00764179	0.000537313	0.113493	0.202448	0.00638806	NA	NA	NA	NA	NA	NA	NA	0.011403	0.217373	NA	NA	NA	NA	75078	79553	1006502	1137968	109430
chr1	27799919	27816669	ENST00000430629	-	ENSG00000158195	WASF2	protein_coding	1675	0.430806	5.97015e-05	0.00149254	NA	0.00328358	0.0242388	0.0041194	0.0109254	0.000597015	0.064	0.112955	0.0125373	0.0207761	NA	NA	NA	NA	NA	NA	0.0238806	0.436179	NA	NA	NA	NA	83332	44086	54352	235820	85939
chr12	90086327	90103077	ENST00000551310	-	ENSG00000070961	ATP2B1	protein_coding	1675	0.395642	0.000119403	0.00555224	0.00316418	0.00674627	0.0282388	0.014209	0.00477612	0.000597015	0.0283582	0.0512836	0.00585075	NA	NA	NA	NA	NA	NA	NA	0.00167164	0.0754627	NA	NA	NA	NA	13233	1394154	1469413	3668623	53717
chr13	102104966	102121716	ENST00000376180	+	ENSG00000198542	ITGBL1	protein_coding	1675	0.407224	0.000119403	0.00202985	0.00591045	0.000895522	0.0419104	0.026806	0.00232836	NA	0.0122388	0.008	0.00597015	0.096597	NA	NA	NA	NA	NA	NA	0.0118209	0.163761	NA	NA	NA	NA	1104319	922275	1273496	777863	263828
chr13	29052515	29069265	ENST00000539099	-	ENSG00000102755	FLT1	protein_coding	1675	0.431582	5.97015e-05	0.00149254	0.0041791	NA	0.0289552	0.0205373	0.00256716	NA	0.0549254	0.0591642	0.00513433	0.0467463	NA	NA	NA	NA	NA	NA	0.00758209	0.0616716	NA	NA	NA	NA	834545	204952	159790	163875	96084
chr13	60721369	60738119	ENST00000400330	-	ENSG00000139734	DIAPH3	protein_coding	1675	0.395881	0.000179104	0.00555224	0.00256716	0.00179104	0.0321194	0.0103881	0.00328358	NA	0.0114627	0.11206	0.00435821	0.053194	NA	NA	NA	NA	NA	NA	0.00632836	0.132478	NA	NA	NA	0.00620896	7673356	12544375	7435686	232471	498394
chr13	73356197	73372947	ENST00000326291	+	ENSG00000083535	PIBF1	protein_coding	1675	0.377015	0.000358209	0.00191045	NA	NA	0.0468657	0.0132537	0.00352239	NA	0.0603582	0.199403	0.0113433	0.0522985	NA	NA	NA	NA	NA	NA	0.0126567	0.15803	NA	NA	NA	NA	236944	25869	2462611	54259	234394
chr13	96688986	96705736	ENST00000376714	-	ENSG00000102595	UGGT2	protein_coding	1675	0.410328	5.97015e-05	0.00877612	0.00477612	NA	0.0240597	0.0132537	0.00483582	0.000537313	0.0038209	0.0248358	NA	0.0843582	NA	NA	NA	NA	NA	NA	NA	0.0259104	NA	NA	NA	NA	368779	2396718	218493	1168837	69958
chr14	103507049	103523799	ENST00000361246	-	ENSG00000198752	CDC42BPB	protein_coding	1675	0.465134	0.000119403	0.0041194	0.00483582	0.0159403	0.0376119	0.0119403	0.0080597	NA	NA	0.212299	0.00543284	0.00716418	NA	NA	NA	NA	NA	NA	0.00208955	0.296239	NA	NA	NA	NA	507671	462195	105962	68864	125083
chr14	45705855	45722605	ENST00000310806	-	ENSG00000129534	MIS18BP1	protein_coding	1675	0.379821	0.00041791	0.00143284	0.00268657	0.00179104	0.0204776	0.0120597	0.00853731	NA	0.0360597	0.179881	0.00280597	0.00734328	NA	NA	NA	NA	NA	NA	0.00137313	0.212716	NA	NA	NA	NA	78873	4321436	12512	4342809	50212
chr14	65381203	65397953	ENST00000542227	+	ENSG00000125954	CHURC1-FNTB	protein_coding	1675	0.390328	0.000238806	0.00143284	NA	0.00346269	0.0347463	0.0175522	0.00841791	NA	0.0616716	0.165851	0.00376119	0.0114627	NA	NA	NA	NA	NA	NA	0.00119403	0.199045	NA	NA	NA	NA	32303	170143	51688	410649	147318
chr15	49322010	49338760	ENST00000559471	-	ENSG00000138593	SECISBP2L	protein_coding	1675	0.359582	0.000298507	0.00292537	NA	NA	0.0358806	0.0118806	0.00686567	NA	0.00895522	0.0614328	0.00931343	NA	NA	NA	NA	NA	NA	NA	0.00608955	0.104955	NA	0.0180299	NA	NA	195417	78710	126380	109215	57925
chr15	59648349	59665099	ENST00000288235	-	ENSG00000157483	MYO1E	protein_coding	1675	0.455582	0.000179104	0.00143284	NA	0.00435821	0.0334328	0.00525373	0.00979104	NA	0.0256119	0.0151642	0.00435821	0.025791	NA	NA	NA	NA	NA	NA	0.0143284	0.268537	NA	NA	NA	0.00895522	161638	265161	207855	3274410	237986
chr1	63137219	63153969	ENST00000251157	-	ENSG00000116641	DOCK7	protein_coding	1675	0.39003	5.97015e-05	0.00471642	0.00477612	0.00310448	0.0197612	0.0130149	0.00877612	NA	NA	0.422209	0.00322388	0.0168358	NA	NA	NA	NA	NA	NA	0.00155224	0.173493	NA	NA	NA	NA	922874	752471	196494	95807	233570
chr1	66797687	66814437	ENST00000371045	+	ENSG00000184588	PDE4B	protein_coding	1675	0.37797	5.97015e-05	0.00292537	0.00197015	NA	0.0276418	0.018209	0.00477612	NA	0.0404776	0.021194	0.00202985	NA	NA	NA	NA	NA	NA	NA	0.00364179	0.109254	NA	NA	NA	NA	162137	694511	440884	1273496	42572
chr1	70654553	70671303	ENST00000370952	-	ENSG00000066557	LRRC40	protein_coding	1675	0.367104	0.000119403	0.00280597	0.00149254	NA	0.0268657	0.0126567	0.0106866	NA	0.0381493	0.36806	0.00292537	0.00543284	NA	NA	NA	NA	NA	NA	0.00638806	0.202149	NA	NA	NA	NA	1668504	53381	245303	61	60815
chr17	20930323	20947073	ENST00000579645	-	ENSG00000124422	USP22	protein_coding	1675	0.46806	0.000238806	0.00274627	NA	0.00453731	0.0454925	0.0100896	0.00979104	0.000597015	0.038806	0.123045	0.0131343	0.0146269	NA	NA	NA	NA	NA	NA	0.0124179	0.202269	NA	NA	NA	NA	1025944	154189	689001	83167	40788
chr18	72265106	72281856	ENST00000582337	+	ENSG00000215421	ZNF407	protein_coding	1675	0.420657	0.000119403	0.00149254	0.00113433	0.00161194	0.0443582	0.0219701	0.00310448	0.000537313	0.0580299	0.174985	0.0111045	0.0674627	NA	NA	NA	NA	NA	NA	0.00704478	0.102388	NA	NA	NA	NA	37812	74417	604171	35	251477
chr20	33396702	33413452	ENST00000359003	-	ENSG00000198646	NCOA6	protein_coding	1675	0.422866	0.000179104	0.00423881	0.0108657	0.00991045	0.0303881	NA	0.00937313	NA	0.0558209	0.0795224	0.00967164	0.016	NA	NA	NA	NA	NA	NA	0.00925373	0.309612	NA	NA	NA	NA	108363	19070	72215	49313	110874
chr21	30671192	30687942	ENST00000286800	+	ENSG00000156273	BACH1	protein_coding	1675	0.392716	0.000358209	0.00131343	NA	0.00292537	0.0288955	NA	0.00644776	0.000537313	0.0316418	0.12406	0.0166567	0.0235821	NA	NA	NA	NA	NA	NA	0.00358209	0.0551642	NA	NA	NA	NA	2320742	122990	2332120	225182	47277
chr2	223725652	223742402	ENST00000357430	+	ENSG00000123983	ACSL3	protein_coding	1675	0.41397	0.000119403	0.00286567	0.00591045	0.00495522	0.0368358	0.00752239	0.0103881	NA	NA	0.165194	0.00979104	NA	NA	NA	NA	NA	NA	NA	0.004	0.197373	NA	NA	NA	NA	1056468	3218950	854394	204825	83705
chr2	229029611	229046361	ENST00000392056	-	ENSG00000153820	SPHKAP	protein_coding	1675	0.369791	0.000119403	0.00286567	0.00453731	0.00310448	0.0278806	0.0109254	0.00764179	NA	0.156896	0.0395821	0.00268657	0.0792836	NA	NA	NA	NA	NA	NA	0.00256716	0.0534925	NA	NA	NA	NA	1342855	842327	580423	1740845	201695
chr22	43394401	43411151	ENST00000263246	-	ENSG00000100266	PACSIN2	protein_coding	1675	0.483582	0.000119403	NA	0.00274627	0.00591045	0.0308657	0.00173134	0.0111045	0.00119403	0.00925373	0.0159403	0.00770149	0.0603582	NA	NA	NA	NA	NA	NA	0.00638806	0.276	NA	NA	NA	NA	117743	117060	359752	136383	145374
chr2	26256976	26273726	ENST00000495146	+	ENSG00000084733	RAB10	protein_coding	1675	0.433791	0.000119403	NA	NA	NA	0.030209	0.00865672	0.0124179	NA	0.0202388	0.180955	0.00179104	NA	NA	NA	NA	NA	NA	NA	NA	0.422985	0.00620896	NA	NA	NA	170639	1211731	116527	51533	101240
chr2	39647703	39664453	ENST00000263881	-	ENSG00000011566	MAP4K3	protein_coding	1675	0.390448	0.000119403	0.00567164	0.00292537	0.00489552	0.0225075	0.0262687	0.00698507	NA	0.037194	0.335701	0.00310448	0.0384478	NA	NA	NA	NA	NA	NA	0.00155224	0.144896	NA	NA	NA	NA	167780	298746	514603	103	188046
chr2	65454887	65471637	ENST00000260641	+	ENSG00000138071	ACTR2	protein_coding	1675	0.405851	0.000179104	0.00370149	0.00161194	0.00298507	0.0320597	0.00334328	0.0118806	NA	0.0113433	0.020597	0.00907463	0.00346269	NA	NA	NA	NA	NA	NA	0.00214925	0.328179	NA	NA	NA	NA	1167644	140745	43097	97452	43500
chr3	12688975	12705725	ENST00000251849	-	ENSG00000132155	RAF1	protein_coding	1675	0.436299	5.97015e-05	0.00465672	0.0038806	0.00155224	0.025194	0.0184478	0.0127761	NA	0.0459701	0.0810149	0.00131343	NA	NA	NA	NA	NA	NA	NA	0.0041791	0.421373	NA	NA	NA	NA	777373	170718	40515	132445	80625
chr3	135684515	135701265	ENST00000264977	+	ENSG00000073711	PPP2R3A	protein_coding	1675	0.398866	5.97015e-05	0.00358209	0.00322388	0.00202985	0.0560597	0.00370149	0.00507463	NA	0.107881	0.305612	0.00561194	0.0247164	NA	NA	NA	NA	NA	NA	0.00889552	0.0438806	NA	NA	NA	NA	244651	1390660	143244	1479650	182218
chr3	160266626	160283376	ENST00000334256	-	ENSG00000186432	KPNA4	protein_coding	1675	0.383582	0.000179104	0.008	0.00322388	0.00901493	0.0365373	0.0184478	0.00567164	0.000656716	0.140657	0.273194	0.00656716	0.0659104	NA	NA	NA	NA	NA	NA	NA	0.0754627	NA	NA	NA	NA	10352	518294	90635	655722	70593
chr3	196594727	196611477	ENST00000323460	+	ENSG00000119231	SENP5	protein_coding	1675	0.437612	5.97015e-05	0.00143284	0.00525373	NA	0.0277015	NA	0.00949254	0.000597015	0.0581493	0.269194	0.00334328	NA	NA	NA	NA	NA	NA	NA	NA	0.368716	NA	NA	NA	NA	34766	35209	27545	299314	66858
chr3	8988436	9005186	ENST00000264926	-	ENSG00000070950	RAD18	protein_coding	1675	0.382269	0.000238806	0.00447761	0.00561194	0.00202985	0.0367164	0.0152239	0.00620896	NA	0.0733731	0.246567	0.00429851	0.0331343	NA	NA	NA	NA	NA	NA	0.0118209	0.0961791	NA	NA	NA	NA	153886	425350	348832	399530	86426
chr4	1873151	1889901	ENST00000508803	+	ENSG00000109685	WHSC1	protein_coding	1675	0.477254	0.000119403	0.00143284	0.00376119	0.00620896	0.0204179	0.00149254	0.0078209	NA	0.0105672	0.118925	0.0176716	0.0358209	NA	0.010209	NA	NA	NA	NA	0.00925373	0.315224	NA	NA	NA	NA	63211	126246	71289	15177	107490
chr4	83804941	83821691	ENST00000355196	-	ENSG00000138674	SEC31A	protein_coding	1675	0.391642	0.000298507	0.00597015	0.00280597	NA	0.0336716	0.00602985	0.00674627	NA	0.074806	0.125851	NA	NA	NA	NA	NA	NA	NA	NA	0.00250746	0.221194	NA	NA	NA	NA	61681	24064	399447	145	81527
chr4	87515468	87532218	ENST00000427191	+	ENSG00000163629	PTPN13	protein_coding	1675	0.352298	0.000119403	0.00268657	0.00262687	NA	0.0391045	0.00841791	0.00555224	0.000537313	0.0540896	0.00967164	0.0215522	NA	NA	NA	NA	NA	NA	NA	0.00286567	0.126149	NA	NA	NA	NA	300685	591645	189152	1627924	220842
chr4	99563030	99579780	ENST00000305798	-	ENSG00000168785	TSPAN5	protein_coding	1675	0.404299	0.000119403	0.00441791	0.0038209	0.00280597	0.0221493	0.0128955	0.00722388	NA	0.0365373	0.0881194	0.00286567	0.0261493	NA	NA	NA	NA	NA	NA	0.00256716	0.057194	NA	NA	NA	0.00835821	9561457	219826	174768	337007	188262
chr5	108728945	108745695	ENST00000361189	-	ENSG00000198961	PJA2	protein_coding	1675	0.394985	0.000119403	0.00316418	0.00489552	0.00328358	0.0332537	0.0278806	0.0119403	NA	0.00728358	0.466627	NA	0.0431642	NA	NA	NA	NA	NA	NA	0.00650746	0.23009	NA	NA	NA	NA	987896	2088326	182322	279460	75285
chr5	52856463	52873213	ENST00000507026	+	ENSG00000164258	NDUFS4	protein_coding	1675	0.385552	0.000119403	0.008	NA	NA	0.0285373	0.00638806	0.00865672	NA	0.0352239	0.127522	0.00471642	0.0733134	NA	NA	NA	NA	NA	NA	NA	0.205612	NA	NA	NA	NA	854967	74159	284150	450865	122586
chr6	111788168	111804918	ENST00000422377	-	ENSG00000009413	REV3L	protein_coding	1675	0.387701	0.000238806	0.00447761	0.00298507	0.00429851	0.0303881	0.0124179	0.00567164	0.00107463	0.0371343	0.140896	0.0127164	0.0197015	NA	NA	NA	NA	NA	NA	0.00734328	0.108836	NA	NA	NA	NA	628506	75224	174657	603755	184684
chr6	151186685	151203435	ENST00000367321	+	ENSG00000120254	MTHFD1L	protein_coding	1675	0.468298	0.000298507	0.00155224	0.00656716	0.00597015	0.0281194	0.00704478	0.00674627	NA	0.101134	0.13606	0.00913433	0.0386269	NA	NA	NA	NA	NA	NA	0.015403	0.30406	NA	NA	NA	NA	334448	946041	458564	796483	236338
chr6	154815043	154831793	ENST00000367213	-	ENSG00000153721	CNKSR3	protein_coding	1675	0.451642	5.97015e-05	NA	0.0041194	0.00292537	0.0259701	0.0124776	0.00573134	0.000537313	0.0544478	0.0466269	0.00883582	0.0402388	NA	NA	NA	NA	NA	NA	0.0081791	0.142149	NA	NA	NA	NA	1339404	745470	3000561	222718	105360
chr6	158244281	158261031	ENST00000539592	+	ENSG00000130340	SNX9	protein_coding	1675	0.402149	0.000179104	0.00274627	0.00286567	0.00441791	0.0385075	0.00226866	0.00776119	NA	0.0262687	0.135224	0.00507463	0.0724179	NA	NA	NA	NA	NA	NA	0.0561791	0.165373	NA	NA	NA	NA	118606	149304	246254	499028	119589
chr6	3064092	3080842	ENST00000490396	+	ENSG00000137275	RIPK1	protein_coding	1675	0.462866	0.000238806	0.00286567	0.00280597	0.00943284	0.0364776	0.00477612	0.00979104	0.00113433	NA	0.211522	0.00543284	0.00519403	NA	NA	NA	0.00346269	NA	NA	0.0141493	0.182269	NA	NA	NA	NA	14833	44098	49809	91693	42193
chr6	52909850	52926600	ENST00000356971	-	ENSG00000112144	ICK	protein_coding	1675	0.408299	0.000298507	0.00447761	0.00149254	0.00137313	0.0260299	0.0152239	0.00704478	NA	0.072597	0.107104	0.00507463	0.0541493	NA	NA	NA	NA	NA	NA	0.00465672	0.110627	NA	NA	NA	NA	26422	205595	335215	3195	60491
chr7	104654626	104671376	ENST00000311117	+	ENSG00000005483	MLL5	protein_coding	1675	0.370567	0.000119403	0.00274627	NA	0.00298507	0.0368955	0.00728358	0.0041791	NA	0.0355224	0.0595821	0.0080597	0.00507463	NA	NA	NA	NA	NA	NA	0.00262687	0.163522	NA	NA	NA	NA	477905	1644784	62196	38	99906
chr7	131012605	131029355	ENST00000446815	+	ENSG00000128585	MKLN1	protein_coding	1675	0.360179	0.000119403	0.00280597	0.00256716	NA	0.0259701	0.0127164	0.00841791	NA	0.0600597	0.274507	0.0104478	NA	NA	NA	NA	NA	NA	NA	0.00519403	0.148657	NA	NA	NA	NA	1885217	1048585	132415	219043	71451
chr7	140607814	140624564	ENST00000288602	-	ENSG00000157764	BRAF	protein_coding	1675	0.396298	5.97015e-05	0.00143284	0.00143284	NA	0.0403582	0.0213731	0.00602985	NA	0.0845373	0.150925	0.00274627	NA	NA	NA	NA	NA	NA	NA	0.00513433	0.168119	NA	NA	NA	NA	187687	81396	178118	626513	190285
chr8	68239162	68255912	ENST00000519436	-	ENSG00000066777	ARFGEF1	protein_coding	1675	0.390388	5.97015e-05	0.00340299	0.00459701	0.0039403	0.0278209	0.00710448	0.00716418	0.000537313	0.0438209	0.112179	0.00644776	0.0436418	NA	NA	NA	NA	NA	NA	NA	0.196179	NA	NA	NA	NA	241350	2768354	107063	2122946	44363
chr9	114230275	114247025	ENST00000259335	-	ENSG00000136813	KIAA0368	protein_coding	1675	0.465254	0.000238806	0.00280597	NA	0.00889552	0.0324179	0.00125373	0.00865672	0.000537313	0.00555224	0.0869851	0.0176716	NA	NA	NA	NA	NA	NA	NA	0.00841791	0.361075	NA	NA	NA	NA	406660	64976	1272234	40421	124052
chr9	96214173	96230923	ENST00000375389	+	ENSG00000048828	FAM120A	protein_coding	1675	0.416776	0.000119403	0.00274627	0.00280597	0.00370149	0.0333134	0.012	0.00513433	NA	0.0743284	0.221194	0.00764179	0.00758209	NA	NA	NA	NA	NA	NA	NA	0.0864478	NA	NA	NA	NA	84735	338608	1607162	317603	79515
chrX	117480036	117496786	ENST00000371822	+	ENSG00000131725	WDR44	protein_coding	1675	0.395642	5.97015e-05	0.00155224	0.00226866	0.00298507	0.0313433	0.00656716	0.00704478	NA	0.00208955	0.0041791	0.00119403	NA	NA	NA	NA	NA	NA	NA	0.00202985	0.219881	NA	NA	NA	NA	109835	2594857	1152075	3011401	103885
chrX	54505849	54522599	ENST00000375135	-	ENSG00000102302	FGD1	protein_coding	1675	0.508239	5.97015e-05	NA	0.00322388	0.0106866	0.0459104	0.0119403	0.00979104	0.000776119	0.025791	0.160478	0.0100299	NA	NA	NA	NA	NA	NA	NA	0.0139701	0.241194	NA	NA	NA	NA	272885	988449	10868	34044	50712
chr10	121652223	121668723	ENST00000369075	+	ENSG00000107651	SEC23IP	protein_coding	1650	0.414182	0.000363636	0.004	0.00157576	0.00266667	0.0512121	0.00375758	0.01	NA	0.0281818	0.144485	0.00751515	0.0266667	NA	NA	NA	NA	NA	NA	0.0090303	0.252485	NA	NA	NA	NA	524242	63561	1810401	19829	49435
chr1	109568350	109584850	ENST00000357672	-	ENSG00000085433	WDR47	protein_coding	1650	0.437273	0.000181818	NA	NA	0.0049697	0.0430909	0.00254545	0.0170909	NA	0.0195758	0.0594545	0.00224242	0.00539394	NA	NA	NA	NA	NA	NA	0.00890909	0.449333	NA	NA	NA	NA	38739	22147	71806	48552	72010
chr11	116952653	116969153	ENST00000446921	-	ENSG00000160584	SIK3	protein_coding	1650	0.427636	6.06061e-05	NA	NA	0.00915152	0.0318182	0.0133939	0.00521212	0.00139394	0.00975758	0.119515	0.00993939	NA	NA	NA	NA	NA	NA	NA	0.0102424	0.241758	NA	NA	NA	NA	270414	97175	2608153	45846	252844
chr11	129939732	129956232	ENST00000532456	+	ENSG00000084234	APLP2	protein_coding	1650	0.417758	0.000484848	0.00436364	0.00212121	0.00690909	0.0262424	0.00333333	0.00733333	NA	0.0262424	0.255091	0.00945455	0.0126061	NA	NA	NA	NA	NA	NA	0.00145455	0.210364	NA	NA	NA	NA	3959087	64351	116841	67002	40800
chr1	113161795	113178295	ENST00000263168	+	ENSG00000116489	CAPZA1	protein_coding	1650	0.409394	0.00030303	0.00284848	0.00375758	0.00442424	0.0407879	0.00648485	0.00733333	NA	0.0160606	0.113939	0.00145455	0.0268485	NA	NA	NA	NA	NA	NA	NA	0.250242	0.00315152	NA	NA	0.0221212	15252	97885	41953	863376	52446
chr11	31391387	31407887	ENST00000529086	+	ENSG00000170946	DNAJC24	protein_coding	1650	0.359394	0.000242424	0.00593939	0.00139394	NA	0.0413939	0.00666667	0.00272727	NA	0.0481818	0.199333	NA	0.0724242	NA	NA	NA	NA	NA	NA	NA	0.111394	NA	NA	NA	NA	99909	1032222	22561	3261641	47498
chr1	16174359	16190859	ENST00000375759	+	ENSG00000065526	SPEN	protein_coding	1650	0.450788	0.000121212	NA	0.00157576	0.00266667	0.0315758	0.00793939	0.0124848	NA	0.028	0.0355152	0.00878788	NA	NA	NA	NA	NA	NA	NA	0.00872727	0.443333	NA	NA	NA	NA	479223	61275	54004	40165	92596
chr11	9270437	9286937	ENST00000328194	-	ENSG00000184014	DENND5A	protein_coding	1650	0.467818	6.06061e-05	0.00315152	0.00315152	0.00957576	0.0385455	0.00824242	0.0114545	0.000545455	NA	0.0809091	0.00515152	NA	NA	NA	NA	NA	NA	NA	0.00921212	0.511273	NA	NA	NA	NA	221341	15263	305311	119231	126565
chr12	107471107	107487607	ENST00000008527	-	ENSG00000008405	CRY1	protein_coding	1650	0.406727	0.000121212	0.00139394	NA	0.00175758	0.0268485	0.0203636	0.00684848	NA	NA	0.468364	0.00642424	0.180545	NA	NA	NA	NA	NA	NA	0.00151515	0.0672121	NA	NA	NA	NA	66678	639035	79794	591982	102465
chr12	31727531	31744031	ENST00000389082	-	ENSG00000170456	DENND5B	protein_coding	1650	0.433394	0.000181818	0.00284848	0.00351515	0.00781818	0.0448485	0.00612121	0.0108485	0.00109091	0.04	0.0741212	0.0263636	0.0273333	NA	NA	NA	NA	NA	NA	0.00157576	0.275152	NA	NA	NA	NA	224872	80039	446306	368321	208874
chr13	34392206	34408706	ENST00000434425	+	ENSG00000133119	RFC3	protein_coding	1650	0.362242	0.000484848	0.00284848	NA	0.00145455	0.039697	0.0152727	0.00381818	NA	0.0412727	0.125818	0.00436364	0.0287879	NA	NA	NA	NA	NA	NA	0.00387879	0.110242	0.00678788	NA	NA	NA	1084217	1040048	1615719	141274	148489
chr13	98628886	98645386	ENST00000490680	+	ENSG00000065150	IPO5	protein_coding	1650	0.379697	0.000848485	0.00181818	NA	0.00430303	0.0432121	0.0125455	0.00660606	0.000545455	0.0938182	0.0163636	0.00830303	0.00242424	NA	NA	NA	NA	NA	NA	0.000484848	0.144242	NA	NA	NA	NA	126547	508634	433568	1923150	45250
chr14	35451163	35467663	ENST00000556994	+	ENSG00000100883	SRP54	protein_coding	1650	0.395939	0.00030303	0.00309091	NA	NA	0.028303	0.0221212	0.00424242	0.000606061	0.0328485	0.141212	0.00533333	0.0376364	NA	NA	NA	NA	NA	NA	0.00806061	0.267576	NA	NA	NA	NA	22949	2148895	63514	106310	47610
chr15	40886218	40902718	ENST00000346991	+	ENSG00000137812	CASC5	protein_coding	1650	0.426242	0.000424242	0.00139394	0.00745455	0.00369697	0.0301212	0.00381818	0.00842424	0.00121212	0.088303	0.119636	0.00121212	0.0555758	NA	NA	NA	NA	NA	NA	0.00490909	0.378788	0.00630303	NA	NA	NA	61108	19557	59734	28966	70322
chr15	71039432	71055932	ENST00000322954	-	ENSG00000137831	UACA	protein_coding	1650	0.404424	0.000181818	NA	0.00169697	0.00115152	0.0428485	0.0138182	0.0118182	0.000545455	0.0221818	0.181939	0.0101212	NA	NA	NA	NA	NA	NA	NA	NA	0.242061	NA	NA	NA	NA	625676	67956	1268048	128995	109039
chr15	75855130	75871630	ENST00000306726	-	ENSG00000169410	PTPN9	protein_coding	1650	0.449879	0.000121212	0.00151515	0.00278788	0.00145455	0.0415758	0.0107879	0.0089697	0.000545455	0.0300606	0.0664848	0.00418182	NA	NA	NA	NA	NA	NA	NA	0.00242424	0.456606	NA	NA	NA	NA	83506	18793	199016	69717	112168
chr16	25010487	25026987	ENST00000573449	-	ENSG00000140750	ARHGAP17	protein_coding	1650	0.446424	0.000181818	0.00290909	0.00139394	0.00642424	0.0363636	0.00236364	0.00957576	NA	0.084	0.122909	0.00545455	0.0147273	NA	0.0489697	NA	NA	NA	NA	0.00278788	0.260485	NA	NA	NA	NA	1334309	220334	149440	16074	47315
chr17	30264037	30280537	ENST00000322652	+	ENSG00000178691	SUZ12	protein_coding	1650	0.416485	0.000242424	NA	0.00193939	0.00260606	0.0253939	0.00727273	0.0108485	0.000606061	0.0247879	0.014303	0.00709091	NA	NA	NA	NA	NA	NA	NA	0.00145455	0.374788	NA	NA	NA	NA	44117	361497	351422	35308	64027
chr18	18675312	18691812	ENST00000399799	-	ENSG00000067900	ROCK1	protein_coding	1650	0.385333	6.06061e-05	0.00593939	NA	0.00339394	0.0342424	0.00527273	0.010303	0.000666667	0.0281212	0.226303	NA	0.0161818	NA	NA	NA	NA	NA	NA	NA	0.184364	NA	NA	NA	NA	4519323	417449	4887258	130390	162111
chr1	86845525	86862025	ENST00000370566	-	ENSG00000122417	ODF2L	protein_coding	1650	0.348788	0.000484848	0.0029697	0.00563636	0.0029697	0.0347273	0.00478788	0.00824242	NA	0.0273333	0.243333	0.00690909	NA	NA	NA	NA	NA	NA	NA	NA	0.101091	NA	NA	NA	NA	647909	466102	772377	308227	49517
chr18	9475007	9491507	ENST00000019317	+	ENSG00000017797	RALBP1	protein_coding	1650	0.423212	0.00030303	0.00145455	0.00242424	0.00569697	0.0238182	0.0181212	0.00963636	0.000727273	0.0178788	0.317333	0.00236364	0.072	NA	NA	NA	NA	NA	NA	0.0138182	0.232303	NA	NA	NA	NA	193220	72589	31784	4177955	63105
chr19	15426856	15443356	ENST00000360016	-	ENSG00000141867	BRD4	protein_coding	1650	0.472485	0.000121212	0.00139394	0.00121212	0.0049697	0.0301818	NA	0.00606061	0.00115152	0.00369697	0.0430303	0.0117576	NA	NA	NA	NA	NA	NA	NA	0.0153333	0.287939	NA	NA	NA	NA	12094	20975	177567	734960	79548
chr1	94130885	94147385	ENST00000260502	-	ENSG00000137936	BCAR3	protein_coding	1650	0.455152	0.000181818	0.00151515	0.00321212	0.00490909	0.0381212	0.00769697	0.00509091	0.000545455	0.0214545	0.169091	0.00230303	NA	NA	NA	NA	NA	NA	NA	0.00145455	0.1	NA	NA	NA	NA	296017	187628	87167	736547	120037
chr20	32951041	32967541	ENST00000374864	+	ENSG00000078747	ITCH	protein_coding	1650	0.439455	0.000121212	NA	0.0030303	0.00139394	0.0147879	0.0147879	0.0175758	0.000545455	0.0400606	0.0370909	0.00909091	NA	NA	NA	NA	NA	NA	NA	0.00206061	0.447394	0.00618182	NA	NA	NA	63088	280050	157304	51433	148157
chr20	46130601	46147101	ENST00000341724	+	ENSG00000124151	NCOA3	protein_coding	1650	0.417091	6.06061e-05	NA	0.00187879	0.00121212	0.0223636	0.00866667	0.00775758	NA	0.00224242	0.0857576	0.0120606	NA	NA	NA	NA	NA	NA	NA	0.00927273	0.370364	NA	NA	NA	NA	1367673	181103	1559274	145127	155020
chr2	135676395	135692895	ENST00000264157	+	ENSG00000082258	CCNT2	protein_coding	1650	0.388303	0.000121212	0.00157576	0.00351515	0.00181818	0.033697	0.0117576	0.00684848	0.00145455	0.00939394	0.101455	0.00284848	NA	NA	NA	NA	NA	NA	NA	0.00284848	0.203455	NA	NA	NA	NA	93439	464203	241178	219	40517
chr22	21921836	21938336	ENST00000342192	+	ENSG00000185651	UBE2L3	protein_coding	1650	0.492121	6.06061e-05	NA	0.00175758	0.00290909	0.0270909	0.0105455	0.00830303	0.000606061	NA	0.06	NA	NA	NA	NA	NA	NA	NA	NA	NA	0.448788	NA	NA	NA	NA	25249	116086	20541	553260	56487
chr22	33197687	33214187	ENST00000266085	+	ENSG00000100234	TIMP3	protein_coding	1650	0.462727	0.000242424	0.00145455	0.00121212	0.00127273	0.0418182	0.00224242	0.00793939	0.00121212	0.0740606	0.0050303	0.0164242	NA	NA	NA	NA	NA	NA	NA	0.0221818	0.138667	NA	NA	NA	NA	2415757	302869	431374	389413	61343
chr2	38813671	38830171	ENST00000409636	-	ENSG00000143889	HNRPLL	protein_coding	1650	0.400303	0.00030303	NA	0.0101818	NA	0.028	0.00169697	0.0109697	0.000606061	NA	0.0685455	0.0150909	0.0384242	NA	NA	NA	NA	NA	NA	NA	0.22497	NA	NA	NA	NA	185739	140569	495886	175155	41051
chr2	48541776	48558276	ENST00000413569	+	ENSG00000170802	FOXN2	protein_coding	1650	0.380061	0.000121212	0.00278788	0.00327273	NA	0.0227879	0.00369697	0.00721212	NA	0.0495152	0.149333	0.0104242	NA	NA	NA	NA	NA	NA	NA	0.00624242	0.183879	NA	NA	NA	NA	86131	507684	5315340	408844	58691
chr2	61108656	61125156	ENST00000295025	+	ENSG00000162924	REL	protein_coding	1650	0.368485	0.000181818	0.00357576	0.00175758	0.00587879	0.0385455	0.0135758	0.0104242	NA	0.0100606	0.173394	0.00587879	NA	NA	NA	NA	NA	NA	NA	NA	0.177455	NA	NA	NA	NA	96155	79435	18891	328023	41989
chr2	75873920	75890420	ENST00000358788	+	ENSG00000115364	MRPL19	protein_coding	1650	0.373212	0.000545455	0.00466667	0.00272727	0.00581818	0.037697	0.0163636	0.0069697	0.00115152	0.0118182	0.391091	NA	0.0164242	NA	NA	NA	NA	NA	NA	0.00121212	0.0929091	NA	NA	NA	0.00666667	9218842	677061	8736726	77072	43965
chr3	142281168	142297668	ENST00000350721	-	ENSG00000175054	ATR	protein_coding	1650	0.411273	0.000242424	0.00145455	0.00333333	NA	0.0278788	0.00509091	0.00757576	0.000545455	0.0439394	0.137576	0.00157576	0.0434545	NA	NA	NA	NA	NA	NA	0.00321212	0.262242	NA	NA	NA	NA	90815	422018	612286	145597	129589
chr3	172468472	172484972	ENST00000232458	+	ENSG00000114346	ECT2	protein_coding	1650	0.361636	0.000848485	0.00448485	0.00139394	0.00157576	0.0452727	0.00812121	0.00387879	NA	NA	0.0794545	0.0149091	0.0234545	NA	NA	0.00539394	NA	NA	NA	0.00193939	0.146727	NA	NA	NA	NA	607771	349980	4230069	39464	70792
chr3	49433135	49449635	ENST00000418115	-	ENSG00000067560	RHOA	protein_coding	1650	0.460061	0.000121212	NA	0.00181818	0.00478788	0.0301212	0.00933333	0.0139394	0.00151515	0.0115758	0.0750909	0.00224242	0.0089697	NA	NA	NA	0.00242424	NA	NA	0.0106667	0.495152	NA	NA	NA	NA	13844	4575	195716	3	53057
chr4	39624210	39640710	ENST00000295958	-	ENSG00000163683	C4orf34	protein_coding	1650	0.431758	0.000121212	NA	0.00181818	0.00309091	0.0388485	0.0153333	0.00884848	0.000545455	0.0473939	0.112303	0.00430303	0.0217576	NA	NA	NA	NA	NA	NA	0.00309091	0.384788	NA	NA	NA	NA	71492	183772	121439	58953	88169
chr5	157269683	157286183	ENST00000411809	-	ENSG00000113282	CLINT1	protein_coding	1650	0.406	6.06061e-05	NA	0.00424242	0.00175758	0.0384848	NA	0.00715152	NA	0.139879	0.0195758	0.00430303	NA	NA	NA	NA	NA	NA	NA	0.00115152	0.315273	NA	NA	NA	NA	243400	1298233	62437	1403905	72886
chr5	171694575	171711075	ENST00000393792	-	ENSG00000168246	UBTD2	protein_coding	1650	0.431879	0.000121212	0.00424242	NA	0.00454545	0.0364848	NA	0.00781818	0.000666667	0.0264242	0.0951515	0.0224848	0.0228485	NA	NA	NA	NA	NA	NA	0.00369697	0.317515	NA	NA	NA	NA	55729	49427	786445	357200	74431
chr5	172410760	172427260	ENST00000519374	+	ENSG00000113732	ATP6V0E1	protein_coding	1650	0.441758	0.000242424	0.00139394	0.00187879	0.000969697	0.0272727	0.00139394	0.0144242	NA	0.0347273	0.060303	0.00981818	NA	NA	NA	NA	NA	NA	NA	0.00418182	0.412	NA	NA	NA	NA	32594	13986	290965	24389	51688
chr6	111120340	111136840	ENST00000323817	-	ENSG00000155111	CDK19	protein_coding	1650	0.423818	0.000181818	0.00606061	0.00575758	0.00345455	0.0495152	0.00921212	0.0121212	NA	0.0521212	0.127939	0.00381818	NA	NA	NA	NA	NA	NA	NA	0.00290909	0.319758	NA	NA	NA	NA	595633	483393	543418	59146	205659
chr6	142468367	142484867	ENST00000367630	+	ENSG00000009844	VTA1	protein_coding	1650	0.357515	6.06061e-05	0.00315152	0.00339394	NA	0.0333333	NA	0.00793939	0.000545455	0.0880606	0.319091	0.00169697	0.0244242	NA	NA	NA	NA	NA	NA	0.00442424	0.0988485	NA	NA	NA	NA	114688	2966421	564236	2772582	73718
chr7	115850547	115867047	ENST00000358204	+	ENSG00000135269	TES	protein_coding	1650	0.376	0.000121212	0.00587879	NA	NA	0.0199394	0.0389091	0.00327273	0.000545455	0.0146061	0.0584848	0.00751515	0.038	NA	NA	NA	NA	NA	NA	NA	0.06	NA	NA	NA	NA	249107	1190577	5098357	3091910	48290
chr7	156931607	156948107	ENST00000348165	+	ENSG00000009335	UBE3C	protein_coding	1650	0.456909	6.06061e-05	NA	0.00721212	0.00787879	0.0282424	0.0110303	0.00448485	NA	0.0350909	0.183697	0.00660606	0.0362424	NA	NA	NA	NA	NA	0.00460606	0.0126667	0.229636	NA	NA	NA	NA	158102	165731	1452395	245705	130459
chr7	23037249	23053749	ENST00000440481	-	ENSG00000122591	FAM126A	protein_coding	1650	0.372	6.06061e-05	0.00454545	NA	0.0010303	0.0339394	0.0131515	0.00551515	0.000545455	0.0207273	0.180424	0.0159394	0.0881212	NA	NA	NA	0.00248485	NA	NA	0.00551515	0.0767879	NA	NA	NA	NA	151328	296078	117444	91603	72861
chr8	130935618	130952118	ENST00000519540	-	ENSG00000153310	FAM49B	protein_coding	1650	0.410303	0.000121212	NA	0.00121212	0.00339394	0.0302424	0.00121212	0.0104848	NA	0.0189091	0.0978182	0.0101212	0.172424	NA	NA	NA	NA	NA	NA	0.00939394	0.19303	NA	NA	NA	NA	4808057	112232	1749684	1964237	98375
chr8	98656407	98672907	ENST00000336273	+	ENSG00000147649	MTDH	protein_coding	1650	0.420242	6.06061e-05	0.00133333	0.00206061	NA	0.0385455	0.0112727	0.00884848	NA	0.0724242	0.0878182	0.00169697	NA	NA	0.0249697	NA	NA	NA	NA	NA	0.260788	NA	NA	NA	NA	91401	500685	357530	1382611	84591
chr9	110045560	110062060	ENST00000358015	+	ENSG00000119318	RAD23B	protein_coding	1650	0.402364	0.000181818	0.00145455	0.00545455	0.00460606	0.0491515	0.00521212	0.00751515	0.000545455	0.0289091	0.185576	0.014	0.0304242	NA	NA	NA	NA	NA	NA	NA	0.209394	NA	NA	NA	NA	1611112	271764	161572	2355033	48915
chr9	128024073	128040573	ENST00000497580	+	ENSG00000165219	GAPVD1	protein_coding	1650	0.434848	0.000242424	NA	0.008	0.00115152	0.0373939	0.00115152	0.0108485	NA	0.0295152	0.0300606	0.00975758	NA	NA	NA	NA	NA	NA	NA	0.00806061	0.459818	NA	NA	NA	NA	445543	27635	135599	20407	80070
chr9	128509624	128526124	ENST00000342287	+	ENSG00000167081	PBX3	protein_coding	1650	0.368182	0.000121212	0.00466667	0.00472727	0.00351515	0.0415758	0.0183636	0.00709091	NA	0.00418182	0.00824242	0.0150909	NA	NA	NA	NA	NA	NA	NA	0.00654545	0.0133939	NA	NA	NA	NA	539498	382334	1300003	40111	220032
chr9	26930961	26947461	ENST00000397292	-	ENSG00000137055	PLAA	protein_coding	1650	0.401273	0.000242424	NA	NA	NA	0.0279394	0.0307879	0.0110909	0.000545455	0.0478182	0.325576	0.00515152	0.0226667	NA	NA	NA	NA	NA	NA	0.0029697	0.234727	NA	NA	NA	NA	14635	599082	4786368	161685	43380
chr10	105726959	105743209	ENST00000369755	+	ENSG00000065613	SLK	protein_coding	1625	0.383262	0.000123077	0.0016	0.00350769	NA	0.0333538	0.0192	0.0096	0.000615385	0.0424615	0.397169	0.0168	0.000738462	NA	NA	NA	NA	NA	NA	0.00141538	0.207015	NA	NA	NA	NA	114856	520940	304939	48914	62032
chr10	32201492	32217742	ENST00000375250	-	ENSG00000165322	ARHGAP12	protein_coding	1625	0.408985	0.000123077	0.00603077	0.0016	NA	0.0174769	0.00535385	0.0072	0.000553846	0.0343385	0.2984	0.00775385	NA	NA	NA	NA	NA	NA	NA	0.0131077	0.246523	NA	NA	NA	NA	856876	80195	359000	517298	123377
chr10	35625455	35641705	ENST00000537547	+	ENSG00000108100	CCNY	protein_coding	1625	0.441354	6.15385e-05	NA	0.00307692	0.00855385	0.0184	0.0197538	0.00492308	0.00252308	0.0376	0.104	0.00861538	NA	NA	NA	NA	NA	NA	NA	0.00904615	0.130585	NA	NA	NA	NA	2634122	123569	2452443	245885	232643
chr10	75757872	75774122	ENST00000372755	+	ENSG00000035403	VCL	protein_coding	1625	0.425969	0.000123077	0.00387692	0.00129231	0.00541538	0.0307692	0.0153846	0.008	NA	0.0441231	0.0350769	0.00461538	NA	NA	NA	NA	NA	NA	NA	0.00147692	0.335323	NA	NA	NA	NA	113070	80614	82142	123523	122046
chr10	79382103	79398353	ENST00000286627	-	ENSG00000156113	KCNMA1	protein_coding	1625	0.487077	0.000123077	0.00578462	NA	0.00184615	0.024	0.0180923	0.00812308	0.000553846	0.00898462	0.0635077	0.0148308	NA	NA	NA	NA	NA	NA	NA	0.0108923	0.1432	NA	NA	NA	NA	2196840	152195	2367146	395164	753714
chr10	93170096	93186346	ENST00000446394	+	ENSG00000165338	HECTD2	protein_coding	1625	0.369292	0.000123077	0.00430769	0.00123077	0.000923077	0.0431385	0.00596923	0.00664615	NA	0.0887385	0.147815	0.0143385	0.0205538	NA	NA	NA	NA	NA	NA	0.00707692	0.0828923	NA	NA	NA	NA	348054	126075	178100	257259	104422
chr1	110091233	110107483	ENST00000369851	+	ENSG00000065135	GNAI3	protein_coding	1625	0.387877	6.15385e-05	0.00295385	0.00941538	0.00664615	0.0352615	0.0138462	0.00990769	0.000553846	0.0201846	0.118831	0.0117538	0.00898462	NA	NA	NA	NA	NA	NA	0.00910769	0.183877	NA	NA	NA	NA	10281	48170	145320	38897	45742
chr11	32914724	32930974	ENST00000399302	+	ENSG00000060749	QSER1	protein_coding	1625	0.416615	6.15385e-05	0.00147692	0.00307692	0.00824615	0.0303385	NA	0.004	NA	0.0102154	0.187015	NA	0.0124308	NA	NA	NA	NA	NA	NA	0.00923077	0.239815	NA	NA	NA	NA	82685	290710	151405	1383555	87088
chr1	1806252	1822502	ENST00000378606	-	ENSG00000078369	GNB1	protein_coding	1625	0.484554	0.000123077	0.00147692	0.00153846	0.00664615	0.0348308	0.0112615	0.00916923	0.00116923	0.052	0.0474462	0.0201231	0.0248	NA	NA	NA	0.00590769	NA	NA	0.00449231	0.388677	NA	NA	NA	NA	70994	293396	216512	337631	103732
chr1	19266930	19283180	ENST00000455833	-	ENSG00000169991	IFFO2	protein_coding	1625	0.539877	6.15385e-05	0.00430769	0.00726154	0.0156923	0.0274462	0.00510769	0.00596923	0.000615385	0.00504615	0.0485538	0.0112	NA	NA	NA	NA	NA	NA	NA	0.0131692	0.215508	NA	NA	NA	NA	13887	117819	1218810	294894	52405
chr1	247319057	247335307	ENST00000472531	-	ENSG00000196418	ZNF124	protein_coding	1625	0.399508	0.000246154	0.0096	0.00332308	0.00535385	0.0366154	0.0154462	0.00953846	0.00129231	0.00707692	0.3784	0.00418462	0.134277	NA	NA	NA	NA	NA	NA	0.00116923	0.123631	NA	NA	NA	NA	19588	29961	340519	1797222	50030
chr12	69004619	69020869	ENST00000250559	+	ENSG00000127314	RAP1B	protein_coding	1625	0.408369	0.000246154	0.0016	0.0138462	0.00326154	0.0173538	0.0107077	0.00867692	0.000553846	0.0681846	0.0308923	0.00406154	NA	NA	NA	NA	NA	NA	NA	0.00953846	0.261354	NA	NA	NA	NA	36111	948175	1866012	278458	49753
chr12	861759	878009	ENST00000535572	+	ENSG00000060237	WNK1	protein_coding	1625	0.431815	6.15385e-05	NA	0.00375385	0.00406154	0.0242462	0.0134769	0.0103385	NA	0.0512615	0.0338462	0.00713846	NA	NA	NA	NA	NA	NA	NA	NA	0.322954	NA	NA	NA	NA	198644	309953	119495	363139	158707
chr12	95595008	95611258	ENST00000451107	-	ENSG00000180263	FGD6	protein_coding	1625	0.405846	0.000123077	0.00436923	NA	0.00135385	0.0310154	0.0201846	0.00332308	0.000615385	0.0234462	0.0267077	0.0016	0.0232615	NA	NA	NA	NA	NA	NA	0.00892308	0.135815	NA	NA	NA	NA	103854	440324	343029	263	136084
chr13	43597339	43613589	ENST00000379221	+	ENSG00000120675	DNAJC15	protein_coding	1625	0.413108	6.15385e-05	0.00313846	0.00436923	NA	0.0342769	0.00406154	0.0072	NA	0.0732923	0.193477	0.00258462	0.103631	NA	NA	NA	NA	NA	NA	NA	0.239877	NA	NA	NA	NA	816080	699936	773149	30962	85706
chr13	50639864	50656114	ENST00000416253	-	ENSG00000231607	DLEU2	lincRNA	1625	0.341415	0.000369231	0.00363077	0.00547692	0.00418462	0.0279385	0.0171692	0.00910769	NA	0.00338462	0.0453538	0.0196308	NA	NA	NA	NA	NA	NA	NA	0.00313846	0.0386462	NA	NA	NA	NA	45477	1279586	21056	299	42586
chr14	102605840	102622090	ENST00000557485	+	ENSG00000140153	WDR20	protein_coding	1625	0.442646	0.000184615	NA	0.00289231	0.00147692	0.0518769	0.00910769	0.00996923	NA	0.00941538	0.0790154	0.00375385	0.0472	NA	NA	NA	NA	NA	NA	0.00516923	0.386585	NA	NA	NA	NA	140255	88705	49337	1763160	69180
chr14	69429907	69446157	ENST00000193403	-	ENSG00000072110	ACTN1	protein_coding	1625	0.520369	0.000307692	0.00147692	0.00307692	0.00935385	0.0180308	0.00910769	0.00504615	0.00123077	0.00966154	0.0368615	0.00295385	0.0225231	NA	NA	NA	NA	NA	NA	0.00492308	0.118092	NA	NA	NA	NA	143197	71479	343419	212036	105297
chr15	90931450	90947700	ENST00000268182	+	ENSG00000140575	IQGAP1	protein_coding	1625	0.423323	0.000246154	NA	0.0016	0.00461538	0.0236923	0.00713846	0.00861538	NA	0.0589538	0.0912615	0.00467692	NA	NA	NA	NA	NA	NA	NA	0.00116923	0.2928	NA	NA	NA	NA	101747	26735	502704	154171	114025
chr1	66999066	67015316	ENST00000237247	+	ENSG00000118473	SGIP1	protein_coding	1625	0.391508	0.000184615	NA	0.00707692	0.00209231	0.0361231	0.00436923	0.00393846	NA	0.0974154	0.0924923	0.00972308	0.0144	NA	NA	NA	NA	NA	NA	0.0121231	0.0903385	NA	NA	NA	NA	55056	158804	239505	1474875	210991
chr17	34900781	34917031	ENST00000495023	+	ENSG00000005955	GGNBP2	protein_coding	1625	0.422831	0.000307692	0.00492308	NA	0.00578462	0.0248615	0.00978462	0.00898462	NA	0.0268308	0.0891077	0.00596923	NA	NA	NA	NA	NA	NA	NA	0.0124308	0.312062	NA	NA	NA	NA	7444	5631	501145	9476	41807
chr17	37026112	37042362	ENST00000318008	+	ENSG00000002834	LASP1	protein_coding	1625	0.544862	0.000184615	NA	0.00498462	0.0186462	0.0183385	0.00264615	0.00412308	NA	NA	0.00836923	0.00381538	NA	NA	NA	NA	NA	NA	NA	0.00738462	0.215754	NA	NA	NA	NA	15308	105634	263596	16059	51911
chr18	29078006	29094256	ENST00000261590	+	ENSG00000046604	DSG2	protein_coding	1625	0.410646	6.15385e-05	NA	0.00116923	0.00898462	0.0378462	0.0096	0.00172308	NA	0.0668923	0.256492	0.00744615	0.0953846	NA	NA	NA	NA	NA	NA	0.00676923	0.0669538	NA	NA	NA	NA	553811	7044512	291129	3320561	50965
chr18	33161003	33177253	ENST00000537748	+	ENSG00000141429	GALNT1	protein_coding	1625	0.431938	0.000184615	NA	0.00116923	0.00732308	0.0187077	0.0332923	0.0072	NA	0.0673846	0.266585	0.0107077	0.00707692	NA	NA	NA	NA	NA	NA	0.00898462	0.0377231	NA	NA	NA	NA	33529	270273	368788	83048	129009
chr18	796297	812547	ENST00000584307	-	ENSG00000176105	YES1	protein_coding	1625	0.406585	0.000184615	NA	NA	0.00276923	0.0380923	NA	0.00972308	NA	0.0308308	0.114892	0.00461538	0.00572308	NA	NA	NA	NA	NA	NA	0.00135385	0.249477	0.00886154	NA	NA	NA	59885	1724976	99048	1758962	90959
chr19	8509651	8525901	ENST00000325495	+	ENSG00000099783	HNRNPM	protein_coding	1625	0.457538	0.000123077	0.00147692	NA	0.00307692	0.0294769	0.00652308	0.00978462	NA	NA	0.0475077	0.00923077	NA	NA	NA	NA	NA	NA	NA	0.00264615	0.224308	NA	NA	NA	NA	701404	5752	25810	54076	44234
chr20	32399110	32415360	ENST00000217402	+	ENSG00000101421	CHMP4B	protein_coding	1625	0.462831	6.15385e-05	NA	0.00301538	0.00590769	0.0340923	NA	0.00615385	0.000553846	0.0295385	0.125231	0.00707692	NA	NA	NA	NA	NA	NA	NA	0.00350769	0.291077	NA	NA	NA	NA	142347	19035	237004	124900	43062
chr2	100090247	100106497	ENST00000258428	-	ENSG00000135945	REV1	protein_coding	1625	0.423138	6.15385e-05	0.00295385	0.00338462	0.00252308	0.0327385	0.0130462	0.00744615	0.000615385	0.0100308	0.0329846	0.00843077	0.121969	NA	NA	NA	NA	NA	NA	0.00332308	0.249969	0.00350769	NA	NA	NA	113637	57218	49769	1072920	89559
chr2	172778958	172795208	ENST00000392584	+	ENSG00000128708	HAT1	protein_coding	1625	0.413846	0.000184615	NA	0.00190769	NA	0.0290462	0.0134154	0.00886154	0.000553846	0.0329231	0.360985	0.00350769	NA	NA	NA	NA	NA	NA	NA	0.00356923	0.376123	NA	NA	NA	NA	45845	174039	145207	28145	69641
chr2	39990157	40006407	ENST00000378727	-	ENSG00000138050	THUMPD2	protein_coding	1625	0.361292	0.000246154	0.00147692	0.0016	0.0016	0.0393846	0.0126154	0.00393846	NA	0.0482462	0.0561231	0.0102769	NA	NA	NA	NA	NA	NA	NA	0.00695385	0.1712	NA	NA	NA	NA	302188	332878	137923	2390082	42960
chr2	9679667	9695917	ENST00000310823	-	ENSG00000151694	ADAM17	protein_coding	1625	0.416492	0.000123077	0.00430769	NA	0.00184615	0.0259692	0.0103385	0.00935385	0.000553846	0.0597538	0.119815	0.00486154	NA	NA	NA	NA	NA	NA	NA	NA	0.340123	NA	NA	NA	NA	92274	28188	27326	287653	67302
chr3	137906109	137922359	ENST00000481646	+	ENSG00000114098	ARMC8	protein_coding	1625	0.406892	0.000123077	0.00596923	0.00166154	NA	0.024	0.0126154	0.00572308	NA	0.0431385	0.169723	0.00627692	0.0154462	NA	NA	NA	NA	NA	NA	0.00190769	0.248	NA	NA	NA	NA	120380	1176183	267077	12318	109282
chr3	187871072	187887322	ENST00000448637	+	ENSG00000145012	LPP	protein_coding	1625	0.454892	0.000123077	0.00295385	NA	0.00350769	0.0300308	0.0252923	0.00806154	NA	0.0177231	0.100246	0.00535385	NA	NA	NA	NA	NA	NA	NA	0.00787692	0.193046	NA	NA	NA	NA	2320767	1363387	1763444	407559	559558
chr3	43328004	43344254	ENST00000454177	+	ENSG00000163788	SNRK	protein_coding	1625	0.391877	0.000184615	0.00596923	0.0064	0.00135385	0.0411692	0.00916923	0.00726154	NA	0.0214154	0.0907077	0.00750769	NA	NA	NA	NA	NA	NA	NA	0.00996923	0.118954	NA	NA	NA	NA	364370	343721	39813	180439	62326
chr3	99979845	99996095	ENST00000344949	+	ENSG00000036054	TBC1D23	protein_coding	1625	0.376246	0.000123077	0.00590769	0.00258462	0.00104615	0.0342769	0.0259692	0.00449231	NA	0.135631	0.145231	0.00486154	0.0860308	NA	NA	NA	NA	NA	NA	0.00486154	0.0900308	NA	NA	NA	NA	33716	82369	62457	146496	64250
chr4	150999426	151015676	ENST00000296550	+	ENSG00000170390	DCLK2	protein_coding	1625	0.413785	6.15385e-05	0.00301538	0.00436923	NA	0.0238769	0.00504615	0.00516923	NA	0.0115077	0.0427692	0.00695385	0.0771077	NA	NA	NA	NA	NA	NA	0.00424615	0.110031	NA	NA	NA	NA	981327	2005499	146384	2394146	179183
chr4	57285531	57301781	ENST00000264220	-	ENSG00000128059	PPAT	protein_coding	1625	0.384246	6.15385e-05	NA	0.00166154	NA	0.0493538	NA	0.00596923	0.000553846	0.0622154	0.0981538	NA	0.0251077	NA	NA	NA	NA	NA	NA	0.00707692	0.133846	NA	NA	NA	NA	8143	527734	362254	133	42253
chr5	132283076	132299326	ENST00000265343	-	ENSG00000072364	AFF4	protein_coding	1625	0.440369	0.000123077	0.00301538	0.00443077	0.00584615	0.0249846	0.00184615	0.0106462	NA	0.0268923	0.0980923	0.00467692	0.0484308	NA	NA	NA	NA	NA	NA	0.0187692	0.381969	NA	NA	NA	NA	92736	33351	54790	88335	88255
chr7	135178625	135194875	ENST00000541284	-	ENSG00000080802	CNOT4	protein_coding	1625	0.398831	0.000184615	0.00295385	0.00153846	0.0016	0.0231385	0.0165538	0.00972308	NA	NA	0.0251077	0.00855385	0.0228308	NA	NA	NA	NA	NA	NA	0.0072	0.307077	NA	NA	NA	NA	258559	171111	499395	47786	148328
chr7	137670563	137686813	ENST00000456390	-	ENSG00000182158	CREB3L2	protein_coding	1625	0.447631	0.000123077	0.00621538	0.0032	0.00332308	0.0398769	0.00258462	0.00486154	0.00123077	0.0245538	0.0731692	0.00849231	0.0267692	NA	NA	NA	NA	NA	NA	0.00824615	0.130523	NA	NA	NA	NA	115204	829313	945042	458265	117800
chr8	25042238	25058488	ENST00000410074	+	ENSG00000147459	DOCK5	protein_coding	1625	0.440615	6.15385e-05	0.00141538	NA	0.00270769	0.0304	0.0124308	0.0112	NA	0.116246	0.132985	0.0108923	NA	NA	NA	NA	NA	NA	NA	0.0102154	0.278338	NA	NA	NA	NA	234274	1612175	194535	1329918	86499
chr8	32405728	32421978	ENST00000341377	+	ENSG00000157168	NRG1	protein_coding	1625	0.409969	6.15385e-05	0.00455385	0.00129231	0.00418462	0.0392	0.00603077	0.00603077	0.000861538	0.0175385	0.00904615	0.00627692	NA	NA	NA	NA	NA	NA	NA	0.00683077	0.151631	NA	NA	NA	NA	896956	1374451	782615	1735376	216820
chr8	79578282	79594532	ENST00000263849	+	ENSG00000104427	ZC2HC1A	protein_coding	1625	0.342892	0.000246154	NA	0.00227692	NA	0.0353846	0.0166769	0.00590769	NA	0.0585231	0.158462	0.00713846	0.0339692	NA	NA	NA	NA	NA	NA	NA	0.0668923	NA	NA	NA	NA	1780165	60780	26724	1665002	51653
chr9	103098971	103115221	ENST00000374902	-	ENSG00000136891	TEX10	protein_coding	1625	0.385108	0.000369231	NA	NA	0.00147692	0.0278769	0.00209231	0.004	0.000553846	0.0263385	0.134154	0.00467692	0.0403077	NA	NA	NA	NA	NA	NA	0.0100308	0.134831	NA	NA	NA	NA	213891	1037027	11795	74273	50855
chr9	113325910	113342160	ENST00000401783	-	ENSG00000165124	SVEP1	protein_coding	1625	0.399815	6.15385e-05	0.00313846	0.00116923	NA	0.0438154	0.0123692	0.00566154	0.000676923	0.00541538	0.107385	0.00738462	0.0473846	NA	NA	NA	NA	NA	NA	0.00972308	0.142708	NA	NA	NA	NA	283240	293893	367369	945286	214629
chr9	34179003	34195253	ENST00000543944	+	ENSG00000165006	UBAP1	protein_coding	1625	0.4352	0.000184615	0.00147692	0.00295385	0.00153846	0.0329231	0.00498462	0.0142154	NA	0.0169231	0.0516308	0.00289231	0.0467077	NA	NA	NA	NA	NA	0.00547692	0.0102769	0.474585	NA	NA	NA	NA	110500	244625	33374	52232	73518
chr9	74526426	74542676	ENST00000479413	+	ENSG00000155621	C9orf85	protein_coding	1625	0.391323	0.000123077	0.00455385	0.00276923	0.00190769	0.0543385	0.00584615	0.00578462	NA	0.0778462	0.181169	NA	0.0578462	NA	NA	NA	NA	NA	NA	0.00172308	0.181046	NA	NA	NA	NA	1200354	1556637	399914	278	61642
chr9	95510844	95527094	ENST00000375512	-	ENSG00000185963	BICD2	protein_coding	1625	0.5072	6.15385e-05	0.00276923	NA	0.0121846	0.0251692	0.00264615	0.00990769	NA	0.0232615	0.159446	0.00393846	0.0658462	NA	NA	NA	NA	NA	NA	0.00578462	0.259877	NA	NA	NA	NA	54547	81256	104277	293894	53449
chr10	101753676	101769676	ENST00000324109	-	ENSG00000107554	DNMBP	protein_coding	1600	0.429062	6.25e-05	0.003	0.004125	0.001625	0.0336875	0.0071875	0.0055625	NA	0.0208125	0.166313	0.0075	NA	NA	NA	NA	NA	NA	NA	0.0075625	0.26075	NA	NA	NA	NA	237253	140170	213782	337095	134342
chr10	118749113	118765113	ENST00000469231	-	ENSG00000187164	KIAA1598	protein_coding	1600	0.406	6.25e-05	0.0030625	NA	0.0033125	0.0264375	0.0059375	0.005	0.0005625	0.03525	0.127562	0.0016875	0.368063	NA	NA	NA	NA	NA	NA	NA	0.136063	NA	NA	NA	NA	223028	277492	1987674	2102366	120801
chr10	22276698	22292698	ENST00000376946	-	ENSG00000136770	DNAJC1	protein_coding	1600	0.385188	6.25e-05	NA	0.0014375	0.0015	0.0195625	0.006625	0.008125	0.0006875	0.0306875	0.11525	0.01025	0.0518125	NA	NA	NA	NA	NA	NA	0.0146875	0.0844375	NA	NA	NA	NA	3312148	431655	220139	312613	83159
chr10	50731072	50747072	ENST00000355832	-	ENSG00000225830	ERCC6	protein_coding	1600	0.427063	0.000375	0.002125	0.010625	NA	0.0295	0.0054375	0.002875	NA	0.023875	0.117	0.007	NA	NA	NA	NA	NA	NA	NA	0.008625	0.109625	NA	NA	NA	NA	383513	279252	1063889	818035	83658
chr1	10270863	10286863	ENST00000377093	+	ENSG00000054523	KIF1B	protein_coding	1600	0.44475	0.000125	0.0044375	NA	NA	0.026375	0.0118125	0.0105	NA	0.0209375	0.0730625	0.0033125	NA	NA	NA	NA	NA	NA	NA	0.0116875	0.411375	NA	NA	NA	NA	148221	29567	209739	268037	97792
chr1	14075930	14091930	ENST00000503842	+	ENSG00000116731	PRDM2	protein_coding	1600	0.40525	6.25e-05	0.0015	NA	0.0088125	0.021	0.01575	0.012875	0.001125	0.0216875	0.0260625	0.0140625	NA	NA	NA	NA	NA	NA	NA	0.0033125	0.087875	NA	NA	NA	NA	809282	1503832	1702838	2089445	74064
chr1	162601163	162617163	ENST00000446985	+	ENSG00000162733	DDR2	protein_coding	1600	0.4075	0.0001875	0.003125	0.002125	NA	0.0278125	0.0095	0.0063125	0.000625	0.0243125	0.0951875	0.0060625	NA	NA	NA	NA	NA	NA	NA	0.003375	0.200125	NA	NA	NA	NA	397232	31530	2990285	607519	123455
chr1	184927682	184943682	ENST00000367511	-	ENSG00000135842	FAM129A	protein_coding	1600	0.412625	6.25e-05	0.0030625	0.0011875	0.0011875	0.0340625	0.0155625	0.0086875	0.0005625	NA	0.187625	NA	0.114	NA	NA	NA	NA	NA	NA	0.0073125	0.1585	NA	NA	NA	NA	179641	143535	305527	70868	183518
chr11	8876965	8892965	ENST00000533471	-	ENSG00000166444	ST5	protein_coding	1600	0.437375	0.0001875	0.0048125	NA	0.009625	0.0314375	0.011375	0.003375	0.000625	0.013125	0.176687	0.007875	NA	NA	NA	NA	NA	NA	NA	0.0040625	0.182688	NA	NA	NA	NA	172582	75874	141546	39735	140350
chr1	198126093	198142093	ENST00000367385	+	ENSG00000151414	NEK7	protein_coding	1600	0.407438	6.25e-05	0.0029375	0.0048125	0.0014375	0.0330625	0.018125	0.0058125	0.000625	0.177125	0.0230625	0.006125	0.018125	NA	NA	NA	NA	NA	NA	0.0031875	0.054875	NA	NA	NA	NA	2542592	249596	611038	381470	165457
chr12	116699143	116715143	ENST00000281928	-	ENSG00000123066	MED13L	protein_coding	1600	0.38625	0.000125	0.003125	0.0035	0.0035	0.0305	0.0068125	0.0099375	0.0005625	0.0185625	0.0290625	0.006625	NA	NA	NA	NA	NA	NA	NA	0.02025	0.145375	NA	NA	NA	NA	88684	438452	1824506	633617	318762
chr12	15926510	15942510	ENST00000281172	-	ENSG00000151491	EPS8	protein_coding	1600	0.367125	0.0003125	0.0021875	0.00175	0.006	0.029125	0.0026875	0.005125	NA	0.0669375	0.204187	0.0086875	0.0244375	NA	NA	NA	NA	NA	NA	0.017875	0.0504375	NA	NA	NA	NA	946109	5679333	971574	92777	169414
chr12	1639057	1655057	ENST00000539198	+	ENSG00000111186	WNT5B	protein_coding	1600	0.5035	0.000125	0.0014375	0.0026875	0.00725	0.0451875	0.001375	0.006	0.0005625	0.04275	0.081625	0.016625	NA	NA	NA	NA	NA	NA	NA	0.0031875	0.22125	NA	NA	NA	NA	47164	25467	376156	580194	109818
chr1	22379120	22395120	ENST00000400259	+	ENSG00000070831	CDC42	protein_coding	1600	0.443437	0.00025	0.0068125	0.006125	0.0070625	0.0194375	0.0044375	0.00575	NA	0.0108125	0.0290625	0.0089375	0.0223125	NA	NA	NA	NA	NA	NA	0.002125	0.408438	NA	NA	NA	NA	359223	21405	991395	115370	40296
chr12	50898768	50914768	ENST00000549620	+	ENSG00000066084	DIP2B	protein_coding	1600	0.447688	6.25e-05	0.0029375	NA	0.0014375	0.0233125	0.00375	0.0131875	0.0005625	0.0169375	0.0255625	NA	0.026875	NA	NA	NA	NA	NA	NA	0.0035	0.375312	NA	NA	NA	NA	219020	24980	434797	221415	175297
chr12	56915713	56931713	ENST00000262031	+	ENSG00000076067	RBMS2	protein_coding	1600	0.426875	0.000125	NA	0.0065625	0.00525	0.0408125	0.0065	0.013625	NA	NA	0.255125	0.0105625	NA	NA	NA	NA	NA	NA	NA	0.00775	0.461938	NA	NA	NA	NA	526963	50946	33666	72513	69032
chr12	62654119	62670119	ENST00000353364	+	ENSG00000135655	USP15	protein_coding	1600	0.35325	0.0001875	0.001625	NA	NA	0.0355	0.0099375	0.0048125	NA	0.022875	0.159312	NA	NA	NA	NA	NA	NA	NA	NA	NA	0.1515	NA	NA	NA	NA	166477	2478711	301411	3339857	145780
chr1	31522838	31538838	ENST00000373741	-	ENSG00000134644	PUM1	protein_coding	1600	0.449375	0.0003125	0.004625	0.0013125	0.00125	0.0585625	0.0084375	0.012625	NA	NA	0.0104375	0.005125	NA	NA	NA	NA	NA	NA	NA	0.0060625	0.426625	NA	NA	NA	NA	57754	193576	299245	231003	133141
chr13	28712643	28728643	ENST00000503791	+	ENSG00000152520	PAN3	protein_coding	1600	0.424812	6.25e-05	0.0041875	NA	0.004875	0.04125	0.001625	0.0100625	0.0005625	0.0416875	0.170375	0.0075	0.00625	NA	NA	NA	0.002375	NA	NA	0.0144375	0.345562	NA	NA	NA	NA	480497	192933	121839	517923	133807
chr13	52158644	52174644	ENST00000298125	+	ENSG00000139668	WDFY2	protein_coding	1600	0.396188	0.0003125	0.0016875	0.00125	0.0020625	0.0254375	0.0268125	0.0044375	NA	0.024375	0.04475	0.0058125	0.0270625	NA	0.0091875	NA	NA	NA	0.006625	0.003	0.083875	NA	0.0183125	NA	NA	387878	614048	143486	131369	175491
chr14	100054363	100070363	ENST00000380243	-	ENSG00000205476	CCDC85C	protein_coding	1600	0.56875	6.25e-05	NA	NA	0.010875	0.0431875	0.00675	0.004875	0.0006875	0.0135	NA	0.0035	NA	NA	NA	NA	NA	NA	NA	0.0031875	0.139563	NA	NA	NA	NA	83137	687089	52511	41116	92760
chr14	31028329	31044329	ENST00000206595	+	ENSG00000092140	G2E3	protein_coding	1600	0.369063	0.0003125	0.004625	0.00175	0.001625	0.024125	0.0158125	0.0046875	NA	0.0083125	0.4495	0.00475	0.0928125	NA	NA	NA	NA	NA	NA	0.0055625	0.109313	NA	NA	NA	NA	23191	6117782	277055	631430	60940
chr14	53146618	53162618	ENST00000556039	-	ENSG00000197930	ERO1L	protein_coding	1600	0.409625	0.0001875	0.001625	0.0046875	0.0023125	0.0496875	0.00875	0.005125	NA	NA	0.132062	0.0111875	0.03425	NA	NA	NA	NA	NA	NA	0.0034375	0.233375	NA	NA	NA	NA	103317	79292	651198	11277	52495
chr1	47799469	47815469	ENST00000371873	+	ENSG00000162368	CMPK1	protein_coding	1600	0.454	6.25e-05	NA	0.00175	0.01325	0.033875	0.002875	0.018	NA	0.0344375	0.026125	0.0175	0.009875	NA	NA	NA	NA	NA	NA	0.018375	0.492688	NA	NA	NA	NA	3594897	968779	58337	19650	45042
chr15	40197093	40213093	ENST00000561100	-	ENSG00000166073	GPR176	protein_coding	1600	0.43275	6.25e-05	0.0060625	0.003625	0.002125	0.0268125	0.0065	0.0068125	0.0005625	0.0156875	0.104875	NA	0.0834375	NA	NA	NA	NA	NA	NA	0.003875	0.224125	NA	NA	NA	NA	2779593	114797	283425	13253	120162
chr15	42248776	42264776	ENST00000220325	-	ENSG00000103966	EHD4	protein_coding	1600	0.447937	6.25e-05	NA	NA	0.009	0.0379375	0.01125	0.0075	NA	0.02275	0.226188	0.001125	0.0233125	0.0416875	NA	NA	NA	NA	NA	0.0043125	0.201313	NA	NA	NA	NA	388312	186122	84430	301589	73826
chr15	60674941	60690941	ENST00000559818	-	ENSG00000182718	ANXA2	protein_coding	1600	0.446	0.00075	NA	NA	0.0065	0.044125	0.01125	0.0045625	0.0013125	0.0209375	0.0645625	NA	NA	NA	NA	NA	NA	NA	NA	0.005875	0.124938	NA	NA	NA	NA	669299	20866	1233697	2248568	47009
chr15	66679155	66695155	ENST00000307102	+	ENSG00000169032	MAP2K1	protein_coding	1600	0.452	6.25e-05	0.0015625	0.00175	0.0023125	0.0278125	0.00375	0.007875	0.0013125	0.0215625	0.150688	0.0029375	0.0195	NA	NA	NA	NA	NA	NA	NA	0.350875	NA	NA	NA	NA	78275	52919	63510	30101	105599
chr15	72766667	72782667	ENST00000379887	+	ENSG00000166233	ARIH1	protein_coding	1600	0.428125	0.000125	NA	0.0069375	0.00275	0.053125	0.0244375	0.0166875	NA	0.0656875	0.126312	0.003625	0.03475	NA	NA	NA	NA	NA	NA	0.018875	0.286438	NA	NA	NA	NA	72890	333356	237040	98147	113025
chr16	24741016	24757016	ENST00000315183	+	ENSG00000090905	TNRC6A	protein_coding	1600	0.402312	0.000125	0.0015	0.0033125	0.0038125	0.02625	0.0109375	0.0098125	0.0011875	0.0165	0.276687	0.0073125	NA	NA	NA	NA	NA	NA	NA	0.008625	0.22175	NA	NA	NA	NA	262045	156833	149695	1088338	96526
chr16	50386845	50402845	ENST00000394688	-	ENSG00000166164	BRD7	protein_coding	1600	0.396125	0.000375	0.0021875	0.0045625	0.0054375	0.0293125	0.0209375	0.0071875	NA	0.0394375	0.279875	0.0131875	0.013625	NA	NA	0.011875	NA	NA	0.0049375	0.0071875	0.150625	NA	NA	NA	NA	1718725	767040	10802	373115	52977
chr16	67596310	67612310	ENST00000264010	+	ENSG00000102974	CTCF	protein_coding	1600	0.471125	0.000125	0.0015625	NA	0.00575	0.031375	0.001	0.0105	NA	0.024125	0.0219375	0.01	0.023625	NA	NA	NA	NA	NA	NA	0.011125	0.488875	NA	NA	NA	NA	64406	15619	55104	81221	76776
chr1	68283150	68299150	ENST00000370982	-	ENSG00000172380	GNG12	protein_coding	1600	0.426562	0.000125	NA	0.0031875	0.0060625	0.0358125	0.0015	0.0133125	NA	0.03475	0.0821875	0.0066875	0.0381875	NA	NA	NA	NA	NA	NA	0.005375	0.144625	NA	NA	NA	NA	363027	264991	105129	2085854	132001
chr18	45441515	45457515	ENST00000356825	-	ENSG00000175387	SMAD2	protein_coding	1600	0.41075	0.0003125	0.0029375	0.0013125	0.0038125	0.0316875	0.001625	0.007	0.000625	0.153062	0.249062	0.0159375	0.01925	NA	NA	NA	NA	NA	NA	0.006625	0.122188	NA	NA	NA	NA	714770	988707	1570560	607911	98049
chr18	9913999	9929999	ENST00000400000	+	ENSG00000101558	VAPA	protein_coding	1600	0.3855	0.000375	0.0029375	0.0155	0.004625	0.046625	0.0215	0.005	0.0005625	0.0408125	0.14575	0.00875	0.0304375	NA	NA	NA	0.0051875	NA	NA	0.00325	0.0985	NA	NA	NA	NA	500625	51446	1929472	299399	46019
chr20	3124842	3140842	ENST00000348031	-	ENSG00000185019	UBOX5	protein_coding	1600	0.445312	0.00025	0.0015625	0.003125	NA	0.028375	0.004875	0.007875	NA	0.0369375	0.0660625	0.0044375	NA	NA	NA	NA	NA	NA	NA	0.002375	0.336625	NA	NA	NA	NA	279510	2430	71946	49213	52623
chr2	148602086	148618086	ENST00000487959	+	ENSG00000121989	ACVR2A	protein_coding	1600	0.373688	6.25e-05	0.0031875	0.009875	0.004625	0.025875	NA	0.01025	0.0008125	0.071125	0.1175	0.015125	NA	NA	NA	NA	NA	NA	NA	0.009875	0.058	NA	NA	NA	NA	136493	9271281	45879	3324128	51930
chr2	149402009	149418009	ENST00000457184	+	ENSG00000135999	EPC2	protein_coding	1600	0.3965	0.0001875	0.0088125	0.0050625	0.0061875	0.0335625	0.0054375	0.0060625	0.0005625	0.064625	0.052125	0.0065	NA	NA	NA	NA	NA	NA	NA	0.00875	0.139313	NA	NA	NA	NA	2824387	130965	984137	622836	109580
chr2	161334305	161350305	ENST00000348849	-	ENSG00000153250	RBMS1	protein_coding	1600	0.394375	0.000125	0.0015625	0.0055	0.0015625	0.0380625	0.0140625	0.0110625	0.0005625	0.0151875	0.0318125	0.0050625	NA	NA	NA	NA	NA	NA	NA	0.0065	0.08075	NA	NA	NA	NA	391179	1498449	685221	643160	221643
chr2	178257372	178273372	ENST00000264167	+	ENSG00000018510	AGPS	protein_coding	1600	0.394313	0.000125	0.004625	0.0035	NA	0.0218125	0.0180625	0.0025625	NA	0.0198125	0.151438	0.0013125	0.0369375	NA	NA	0.0045	NA	NA	NA	NA	0.166375	NA	NA	NA	NA	679809	168687	117508	127513	151192
chr2	204384133	204400133	ENST00000319170	-	ENSG00000173166	RAPH1	protein_coding	1600	0.402938	0.000125	0.0014375	0.0013125	0.0048125	0.0356875	0.0175625	0.007625	0.0006875	0.068	0.267188	0.0080625	NA	NA	NA	NA	NA	NA	NA	0.01075	0.275438	NA	NA	NA	NA	583184	2458311	63241	1010382	101728
chr2	36809334	36825334	ENST00000379245	-	ENSG00000171055	FEZ2	protein_coding	1600	0.427438	0.000375	0.001875	0.002625	0.0060625	0.0391875	0.0150625	0.006125	NA	0.0398125	0.116187	0.0043125	0.124438	NA	NA	NA	NA	NA	NA	0.0016875	0.133063	NA	NA	NA	NA	202621	239506	7056	98498	45933
chr2	64068074	64084074	ENST00000394417	+	ENSG00000169764	UGP2	protein_coding	1600	0.39875	0.000625	0.0018125	0.0031875	0.0038125	0.0438125	0.01025	0.007375	NA	0.0076875	0.0793125	NA	0.0526875	NA	NA	NA	NA	NA	NA	NA	0.101875	NA	NA	NA	0.0055	573252	233744	11592	252207	50622
chr2	69854849	69870849	ENST00000406297	-	ENSG00000115977	AAK1	protein_coding	1600	0.43175	0.000125	0.0015	0.001375	0.003375	0.0339375	0.0073125	0.00475	NA	0.0739375	0.101062	0.003625	0.0186875	NA	NA	NA	NA	NA	NA	0.008	0.168187	NA	NA	NA	NA	83546	480318	354390	98277	162661
chr3	136455220	136471220	ENST00000483235	-	ENSG00000118007	STAG1	protein_coding	1600	0.437875	0.000125	0.0029375	0.003375	0.0010625	0.033375	0.02175	0.008375	NA	0.0543125	0.113312	0.013125	0.060125	NA	NA	NA	NA	NA	NA	0.0063125	0.366938	NA	NA	NA	NA	516532	1309606	382207	66640	414990
chr3	151985829	152001829	ENST00000282486	+	ENSG00000152601	MBNL1	protein_coding	1600	0.368125	0.0003125	0.00325	0.0053125	0.0045625	0.03725	0.0078125	0.00575	0.0011875	0.0175	0.0080625	0.005875	NA	NA	NA	NA	NA	NA	NA	0.0020625	0.0534375	NA	NA	NA	NA	854199	1637595	1967627	1504566	197739
chr3	27509911	27525911	ENST00000428005	-	ENSG00000033867	SLC4A7	protein_coding	1600	0.422062	6.25e-05	0.003375	0.003	0.0011875	0.0426875	0.002625	0.0136875	NA	0.011	0.006125	0.006875	0.0496875	NA	NA	NA	NA	NA	NA	0.00175	0.318437	0.002	NA	NA	NA	74999	837933	1649886	757212	60779
chr3	47189457	47205457	ENST00000409792	-	ENSG00000181555	SETD2	protein_coding	1600	0.41625	0.000125	0.003125	0.00475	0.0033125	0.0361875	0.0175	0.008	NA	0.0213125	0.102938	0.0050625	0.00825	NA	NA	NA	NA	NA	NA	0.002375	0.29975	NA	NA	NA	NA	147187	64058	114264	402	147278
chr3	9439299	9455299	ENST00000431285	+	ENSG00000168137	SETD5	protein_coding	1600	0.382812	0.0001875	0.00475	0.00175	0.0048125	0.0336875	0.0180625	0.00625	NA	0.051875	0.077625	0.0120625	NA	NA	NA	NA	NA	NA	NA	0.002625	0.098375	NA	NA	NA	NA	211817	10824	319729	125	43083
chr4	110354928	110370928	ENST00000504968	+	ENSG00000138802	SEC24B	protein_coding	1600	0.418813	0.0001875	0.0051875	0.0015625	0.00575	0.036625	0.0103125	0.011625	NA	0.029	0.098	0.0073125	0.124688	NA	NA	NA	NA	NA	NA	0.00125	0.250937	NA	NA	NA	NA	86426	765948	214856	1264816	105974
chr4	4528073	4544073	ENST00000507908	-	ENSG00000168818	STX18	protein_coding	1600	0.413	0.0001875	0.009625	0.0025625	NA	0.042375	0.0114375	0.0084375	0.0006875	0.043125	0.115125	0.001875	0.0568125	NA	NA	NA	NA	NA	NA	0.0105625	0.113812	NA	NA	NA	0.011375	212177	1020072	180560	317318	117173
chr4	47900653	47916653	ENST00000464756	-	ENSG00000170448	NFXL1	protein_coding	1600	0.380375	0.000625	0.003125	0.00175	NA	0.032375	0.009625	0.009	NA	0.0296875	NA	0.0089375	0.028875	NA	NA	NA	NA	NA	NA	0.0013125	0.198563	NA	NA	NA	NA	410977	582726	281150	102137	67396
chr4	54243812	54259812	ENST00000358575	+	ENSG00000145216	FIP1L1	protein_coding	1600	0.362875	0.0004375	0.003625	0.0015	NA	0.0464375	0.004625	0.0126875	0.00125	0.0125625	0.0984375	0.00175	NA	NA	NA	NA	NA	NA	NA	0.004875	0.110937	NA	NA	NA	NA	811451	663507	567853	11570	82023
chr4	68550897	68566897	ENST00000322244	-	ENSG00000033178	UBA6	protein_coding	1600	0.380437	0.000125	0.002875	0.004875	0.001125	0.02125	0.006	0.00375	NA	0.172625	0.213688	NA	0.0299375	NA	NA	NA	NA	NA	NA	0.012125	0.171125	NA	NA	NA	NA	115641	609207	10629563	98	85418
chr4	7925653	7941653	ENST00000358461	-	ENSG00000196526	AFAP1	protein_coding	1600	0.47525	0.000125	NA	NA	0.006125	0.0281875	0.0119375	0.0045625	0.0005625	0.00925	0.0415	0.0081875	0.102688	NA	NA	NA	NA	NA	NA	NA	0.281813	NA	NA	NA	NA	831853	426355	841976	500878	181211
chr5	125758838	125774838	ENST00000515200	+	ENSG00000155324	GRAMD3	protein_coding	1600	0.391625	0.000125	NA	NA	0.0061875	0.0258125	0.009625	0.0021875	0.0005625	0.02525	0.180375	0.011	NA	NA	NA	NA	NA	NA	NA	0.0056875	0.141125	NA	NA	NA	NA	137768	2806374	78694	2999552	71225
chr5	133984479	134000479	ENST00000398844	+	ENSG00000113615	SEC24A	protein_coding	1600	0.445062	0.0001875	NA	0.0011875	NA	0.0331875	0.00125	0.0138125	NA	NA	0.060625	0.0049375	0.0031875	NA	NA	NA	NA	NA	NA	0.003625	0.556	0.0034375	NA	NA	NA	49690	65561	338944	15946	79034
chr5	138940751	138956751	ENST00000253815	+	ENSG00000131508	UBE2D2	protein_coding	1600	0.449125	0.000125	0.0015625	0.004625	0.0138125	0.0261875	0.007125	0.0115	NA	0.05075	0.0215625	0.017	0.0383125	NA	NA	NA	NA	NA	NA	0.005375	0.399313	NA	NA	NA	NA	47549	235342	643883	78408	67265
chr5	17217669	17233669	ENST00000322611	+	ENSG00000176788	BASP1	protein_coding	1600	0.428688	6.25e-05	NA	0.00175	0.008375	0.0271875	0.0033125	0.0044375	0.0016875	NA	0.033375	0.0083125	0.0068125	NA	NA	NA	NA	NA	NA	0.0074375	0.0993125	NA	NA	NA	NA	4201919	1277769	2215485	281284	59274
chr6	110501344	110517344	ENST00000368932	+	ENSG00000168438	CDC40	protein_coding	1600	0.383875	0.0001875	NA	NA	0.0015	0.0395	0.015125	0.0073125	0.0005625	0.014	0.279125	0.0025	0.0345625	NA	NA	NA	NA	NA	NA	NA	0.113437	NA	NA	NA	NA	654642	354710	389836	137	52076
chr6	35995488	36011488	ENST00000229795	+	ENSG00000112062	MAPK14	protein_coding	1600	0.41325	0.000125	0.001625	0.00675	0.0015	0.02875	0.018125	0.0104375	NA	0.147875	0.0455625	0.0016875	NA	NA	NA	NA	NA	NA	NA	0.00925	0.228563	NA	NA	NA	NA	62773	556930	426180	106531	83525
chr6	53197947	53213947	ENST00000370918	-	ENSG00000012660	ELOVL5	protein_coding	1600	0.435937	0.0001875	NA	0.0015625	0.0084375	0.0285	0.017	0.0048125	NA	0.08675	0.0478125	0.00475	0.0229375	NA	NA	NA	NA	NA	NA	NA	0.0985625	NA	NA	NA	NA	247347	148192	208277	445830	81751
chr7	123373121	123389121	ENST00000223023	-	ENSG00000106299	WASL	protein_coding	1600	0.373313	6.25e-05	NA	0.0015	0.003625	0.028375	0.0158125	0.0083125	NA	0.11425	0.272125	0.009375	NA	NA	NA	NA	NA	NA	NA	0.004125	0.0974375	NA	NA	NA	NA	151163	1073318	2411623	3839284	67132
chr7	154778794	154794794	ENST00000404141	-	ENSG00000157212	PAXIP1	protein_coding	1600	0.42775	0.0003125	NA	NA	0.0108125	0.022375	0.009125	0.004875	NA	0.0635625	0.0533125	0.0205	0.005625	NA	NA	NA	NA	NA	NA	0.00175	0.119	NA	NA	NA	NA	2381544	1636265	13598	348	59397
chr7	17338246	17354246	ENST00000242057	+	ENSG00000106546	AHR	protein_coding	1600	0.366688	0.0001875	0.0029375	0.002875	0.0013125	0.0328125	0.01175	0.0048125	NA	0.0159375	0.077375	0.0029375	NA	NA	NA	NA	NA	NA	NA	0.0109375	0.04275	NA	NA	NA	NA	748325	514085	452138	652804	47528
chr8	105585417	105601417	ENST00000523830	-	ENSG00000147650	LRP12	protein_coding	1600	0.391562	6.25e-05	0.0030625	0.002875	0.003375	0.02425	0.019625	0.0085	NA	0.0431875	0.46275	0.0075625	NA	NA	NA	NA	NA	NA	NA	0.002125	0.0735625	NA	NA	NA	NA	1133949	2660292	294761	1680988	89815
chr8	54740118	54756118	ENST00000355221	-	ENSG00000047249	ATP6V1H	protein_coding	1600	0.413188	0.0003125	NA	0.0033125	0.002625	0.032375	0.0119375	0.006375	0.00075	0.0238125	0.183938	NA	0.01525	NA	NA	NA	NA	NA	NA	NA	0.14725	NA	NA	NA	NA	1089092	122997	5741664	8249	128001
chr8	6264113	6280113	ENST00000344683	+	ENSG00000147316	MCPH1	protein_coding	1600	0.428937	0.0003125	0.0015	0.0034375	0.00475	0.0270625	0.009125	0.0124375	NA	0.054125	0.288625	0.0074375	0.0805	NA	NA	NA	NA	NA	NA	0.0071875	0.226687	NA	NA	NA	NA	261764	4357306	361927	44	237031
chrX	77025702	77041702	ENST00000373344	-	ENSG00000085224	ATRX	protein_coding	1600	0.427812	6.25e-05	0.0014375	0.002	0.0035625	0.0414375	0.003375	0.0088125	0.000625	0.06775	0.10175	NA	NA	NA	NA	NA	NA	NA	NA	0.006125	0.402187	NA	NA	NA	NA	2038788	40159	1349956	113258	281324
chr10	22987734	23003484	ENST00000376573	-	ENSG00000150867	PIP4K2A	protein_coding	1575	0.438603	0.000126984	0.00584127	0.0032381	0.00514286	0.0247619	0.00577778	0.00412698	NA	0.0542857	0.158032	0.00749206	0.0233651	NA	NA	NA	NA	NA	NA	0.015619	0.0876825	NA	NA	NA	NA	236626	1869053	343070	380942	179706
chr10	70883268	70899018	ENST00000373382	+	ENSG00000122958	VPS26A	protein_coding	1575	0.409016	0.000253968	NA	0.0032381	0.0064127	0.0424762	0.00190476	0.00577778	NA	NA	0.195746	0.0064127	0.0360635	NA	NA	NA	NA	NA	NA	0.0024127	0.275048	NA	NA	NA	NA	16724	18701	948754	595988	49349
chr10	80828792	80844542	ENST00000334512	+	ENSG00000108175	ZMIZ1	protein_coding	1575	0.56254	6.34921e-05	0.0015873	0.00203175	0.0186667	0.0336508	0.0174603	0.0048254	0.00196825	NA	0.105905	0.0141587	NA	NA	NA	NA	NA	NA	NA	0.00653968	0.168825	NA	NA	NA	NA	238427	1012221	273290	1039494	247484
chr10	82213922	82229672	ENST00000429989	+	ENSG00000108219	TSPAN14	protein_coding	1575	0.519873	0.00031746	NA	0.00406349	0.0164444	0.0351746	0.00977778	0.00412698	NA	0.00977778	0.0183492	0.00368254	0.0824127	NA	NA	NA	NA	NA	NA	0.00838095	0.099873	NA	NA	NA	NA	3645262	234509	5941090	248594	68465
chr10	99258625	99274375	ENST00000370664	+	ENSG00000165886	UBTD1	protein_coding	1575	0.475556	6.34921e-05	NA	0.0032381	0.0055873	0.0424127	0.0113651	0.00273016	0.000698413	0.0174603	0.166667	NA	NA	NA	NA	NA	NA	NA	NA	0.00895238	0.235302	NA	NA	NA	NA	101817	41498	75684	259	72341
chr11	13469094	13484844	ENST00000525108	-	ENSG00000148925	BTBD10	protein_coding	1575	0.372381	0.000190476	0.0031746	0.00133333	0.00355556	0.0536508	0.00355556	0.00869841	NA	0.0265397	0.206603	0.00495238	0.0247619	NA	NA	NA	NA	NA	NA	0.00126984	0.12273	NA	NA	NA	NA	1413927	814621	36032	205361	57531
chr1	172501489	172517239	ENST00000367723	+	ENSG00000094975	C1orf9	protein_coding	1575	0.394032	0.000126984	NA	0.00666667	0.00279365	0.0333968	0.00463492	0.00596825	0.00171429	0.0447619	0.163492	0.0031746	0.0624127	NA	NA	NA	NA	NA	NA	0.0100952	0.0974603	NA	NA	NA	NA	904996	734633	611380	88259	79482
chr12	102271129	102286879	ENST00000258534	+	ENSG00000136048	DRAM1	protein_coding	1575	0.444571	0.000126984	0.00292063	0.00146032	0.00533333	0.0175238	NA	0.00850794	NA	0.0419048	0.0835556	0.0071746	0.00495238	NA	NA	NA	0.00812698	NA	NA	0.00177778	0.384571	NA	NA	NA	NA	202826	148283	95587	46484	46272
chr12	112021730	112037480	ENST00000550104	-	ENSG00000204842	ATXN2	protein_coding	1575	0.474857	0.000253968	0.0015873	0.00488889	0.00679365	0.0224127	0.0175238	0.0101587	NA	0.0415873	0.0312381	0.016381	0.00412698	NA	NA	NA	NA	NA	NA	0.0103492	0.486667	NA	NA	NA	NA	190555	42469	108053	86376	147408
chr1	212208919	212224669	ENST00000366991	+	ENSG00000143476	DTL	protein_coding	1575	0.389143	0.00031746	NA	0.00146032	0.00114286	0.0405714	0.0189841	0.00888889	NA	0.191683	0.144381	0.00298413	0.0247619	NA	NA	NA	NA	NA	NA	0.00247619	0.173587	NA	NA	NA	NA	2035	603042	288896	204805	69429
chr12	30833170	30848920	ENST00000256079	-	ENSG00000133704	IPO8	protein_coding	1575	0.367937	0.000507937	0.00444444	0.00450794	0.0015873	0.0334603	NA	0.00133333	NA	0.0539683	0.0690794	0.00768254	NA	NA	NA	NA	0.00463492	NA	NA	0.00177778	0.0549206	NA	NA	NA	NA	1274777	13565	1321914	99694	66998
chr1	245318287	245334037	ENST00000407071	+	ENSG00000162849	KIF26B	protein_coding	1575	0.462159	0.000126984	0.00698413	0.00177778	0.00526984	0.0288254	0.00603175	0.00736508	NA	NA	0.170222	0.0087619	0.0160635	NA	NA	NA	NA	NA	NA	0.00863492	0.0879365	NA	NA	NA	NA	1371351	29757	554354	290460	548141
chr12	50794592	50810342	ENST00000293618	+	ENSG00000161813	LARP4	protein_coding	1575	0.420952	0.000380952	0.00222222	0.00679365	NA	0.0387302	0.00996825	0.0107937	NA	0.0820317	0.040127	0.00520635	0.0378413	NA	NA	NA	NA	NA	NA	0.00126984	0.43454	NA	NA	NA	NA	64175	280358	538973	117239	79187
chr12	99038919	99054669	ENST00000551964	+	ENSG00000120868	APAF1	protein_coding	1575	0.408825	0.00031746	0.00165079	0.00571429	0.00463492	0.0413333	0.0161905	0.0101587	0.000571429	0.0136508	0.18781	NA	0.0102222	0.0448889	NA	NA	NA	NA	NA	0.00203175	0.244825	NA	NA	NA	NA	1515654	43141	1351943	330	88386
chr13	20341332	20357082	ENST00000492741	-	ENSG00000121390	PSPC1	protein_coding	1575	0.48927	0.000126984	0.00209524	0.00209524	0.00793651	0.0309206	0.00749206	0.0100317	NA	0.0163175	0.0954921	0.0048254	NA	0.155873	NA	NA	NA	NA	NA	NA	0.453841	NA	NA	NA	NA	NA	NA	NA	NA	107554
chr13	33160564	33176314	ENST00000315596	+	ENSG00000083642	PDS5B	protein_coding	1575	0.417206	6.34921e-05	0.0047619	0.00171429	0.00838095	0.0494603	0.00838095	0.00793651	0.000952381	0.0151746	0.195556	0.0243175	NA	NA	NA	NA	NA	NA	NA	0.00152381	0.227302	NA	NA	NA	NA	1191641	186755	476707	47628	191593
chr13	37618100	37633850	ENST00000360252	-	ENSG00000102710	FAM48A	protein_coding	1575	0.369905	0.000571429	0.00152381	0.00755556	0.0031746	0.0440635	0.00971429	0.00520635	NA	0.0347937	0.304063	0.00126984	NA	NA	NA	NA	NA	NA	NA	0.00653968	0.0986667	NA	NA	NA	NA	20346	576922	10099	1290091	50397
chr1	36091695	36107445	ENST00000373237	-	ENSG00000126067	PSMB2	protein_coding	1575	0.397079	0.000190476	0.00146032	0.00228571	NA	0.0311746	0.0224127	0.00457143	NA	0.0443175	0.0558095	0.0071746	0.0229841	NA	NA	NA	NA	NA	NA	0.00590476	0.301714	NA	NA	NA	NA	44408	72031	35065	166382	40260
chr14	52118576	52134326	ENST00000395718	+	ENSG00000139926	FRMD6	protein_coding	1575	0.400571	6.34921e-05	0.00292063	0.00361905	NA	0.0333968	0.00609524	0.00609524	0.000698413	0.036254	0.199048	0.00450794	0.0462857	NA	NA	NA	NA	NA	NA	NA	0.0692698	NA	NA	NA	NA	168445	394204	312943	707328	78869
chr14	71374122	71389872	ENST00000238570	+	ENSG00000100731	PCNX	protein_coding	1575	0.400762	6.34921e-05	0.00812698	0.0064127	0.00120635	0.0379683	0.0206984	0.00469841	NA	0.151302	0.209778	0.00838095	NA	NA	NA	NA	NA	NA	NA	0.0199365	0.0540952	NA	NA	NA	NA	450931	1135400	1722537	98234	207977
chr14	75164068	75179818	ENST00000356357	-	ENSG00000119682	KIAA0317	protein_coding	1575	0.416698	0.000253968	NA	0.00165079	NA	0.027619	0.00850794	0.00660317	NA	0.0650159	0.0982222	0.00133333	0.167302	NA	NA	NA	NA	NA	NA	0.00634921	0.195937	NA	NA	NA	NA	60784	190838	177547	31	51863
chr15	81071684	81087434	ENST00000220244	+	ENSG00000103888	KIAA1199	protein_coding	1575	0.461143	6.34921e-05	NA	NA	NA	0.0266667	0.00546032	0.00203175	NA	0.0688254	0.0671746	0.00273016	NA	NA	NA	NA	NA	NA	NA	0.00653968	0.0780317	NA	NA	NA	NA	181610	23722	156410	855588	172433
chr15	89787180	89802930	ENST00000300027	+	ENSG00000140525	FANCI	protein_coding	1575	0.394032	0.000380952	0.00469841	0.00196825	0.00171429	0.0338413	0.0136508	0.00977778	NA	0.0131429	0.463556	0.00266667	0.0285079	NA	NA	NA	NA	NA	NA	0.00228571	0.17854	NA	NA	NA	NA	291637	41589	32355	330517	73312
chr16	16043434	16059184	ENST00000349029	+	ENSG00000103222	ABCC1	protein_coding	1575	0.48	6.34921e-05	NA	0.00463492	0.0107302	0.0427937	0.00133333	0.00984127	NA	0.0518095	0.112	0.00761905	0.0933968	NA	NA	NA	NA	NA	NA	0.00768254	0.289905	NA	NA	NA	NA	2995482	223226	1112746	60987	193497
chr16	22018959	22034709	ENST00000567004	+	ENSG00000185716	C16orf52	protein_coding	1575	0.416952	0.000126984	0.00298413	0.0024127	0.00501587	0.0232381	NA	0.0055873	NA	0.0143492	0.0505397	0.0148571	0.0403175	NA	NA	NA	NA	NA	NA	NA	0.173841	NA	NA	NA	NA	158632	24291	298297	487194	68740
chr17	16945859	16961609	ENST00000577514	+	ENSG00000133030	MPRIP	protein_coding	1575	0.499111	0.000190476	0.00152381	0.00946032	0.00939683	0.0394286	0.00526984	0.00679365	0.00152381	0.095873	0.139873	0.00355556	NA	NA	NA	NA	NA	NA	NA	0.00774603	0.134667	NA	NA	NA	NA	394440	601247	118449	388692	89074
chr17	47424085	47439835	ENST00000362063	-	ENSG00000198740	ZNF652	protein_coding	1575	0.419873	0.000253968	0.00304762	0.00126984	0.00812698	0.0408254	0.0191111	0.0104762	NA	0.0107302	0.110286	0.0168889	NA	NA	NA	NA	NA	NA	NA	0.012254	0.283873	NA	NA	NA	NA	377681	41584	266328	213462	67908
chr17	49182476	49198226	ENST00000357122	-	ENSG00000008294	SPAG9	protein_coding	1575	0.460952	6.34921e-05	NA	0.00647619	0.00120635	0.0185397	0.00203175	0.00933333	NA	NA	0.0467937	0.00368254	NA	NA	NA	NA	NA	NA	NA	0.00634921	0.563048	NA	NA	NA	NA	212887	56559	212494	32797	155221
chr17	57697219	57712969	ENST00000393043	+	ENSG00000141367	CLTC	protein_coding	1575	0.406476	6.34921e-05	0.00311111	0.00304762	0.00374603	0.0374603	0.00431746	0.00247619	NA	0.067619	0.0775873	0.00190476	NA	NA	NA	NA	NA	NA	NA	NA	0.246095	NA	NA	NA	NA	47643	11506	37447	464419	70968
chr1	91472079	91487829	ENST00000361321	-	ENSG00000122482	ZNF644	protein_coding	1575	0.38546	0.000253968	0.00330159	0.00419048	0.00203175	0.0415238	0.0106667	0.00533333	NA	0.0411429	0.13581	0.00152381	NA	NA	NA	NA	NA	NA	NA	0.00368254	0.150349	NA	NA	NA	NA	1349376	238493	953735	478574	106087
chr19	3359616	3375366	ENST00000346156	+	ENSG00000141905	NFIC	protein_coding	1575	0.590286	0.000126984	NA	0.00615873	0.0265397	0.0304762	0.0180952	0.00463492	0.00228571	0.0128254	0.0454603	0.0672381	NA	NA	NA	NA	NA	NA	NA	0.0532063	0.110857	NA	NA	NA	NA	106678	150043	91202	296652	103987
chr20	30327074	30342824	ENST00000340513	+	ENSG00000088325	TPX2	protein_coding	1575	0.425841	0.000126984	0.00768254	NA	NA	0.036381	0.008	0.00812698	NA	0.0227302	0.0631111	0.00279365	0.0173968	NA	NA	NA	NA	NA	NA	0.00539683	0.433905	NA	NA	NA	NA	40103	132031	165683	16418	62534
chr20	3372522	3388272	ENST00000252032	-	ENSG00000088854	C20orf194	protein_coding	1575	0.423111	0.000126984	0.00596825	0.00660317	0.00209524	0.0417143	0.0015873	0.00965079	NA	NA	0.274349	NA	0.0688254	NA	NA	NA	NA	NA	NA	NA	0.22673	NA	NA	NA	NA	128385	260347	143766	63392	158321
chr20	508732	524482	ENST00000400217	-	ENSG00000101266	CSNK2A1	protein_coding	1575	0.419556	6.34921e-05	0.00285714	NA	0.00539683	0.0570159	0.00622222	0.0109206	NA	0.067873	0.0389841	NA	0.135175	NA	NA	NA	NA	NA	NA	NA	0.228063	NA	NA	NA	NA	41295	102785	72872	289873	61142
chr2	172275562	172291312	ENST00000462821	-	ENSG00000123600	METTL8	protein_coding	1575	0.430286	0.000253968	0.0048254	0.00533333	0.00273016	0.0341587	0.00749206	0.0088254	0.00126984	0.052	0.266286	0.00266667	0.276444	NA	NA	NA	NA	NA	NA	0.00228571	0.0814603	NA	NA	NA	NA	163488	348602	427669	87553	97330
chr2	200776029	200791779	ENST00000491721	+	ENSG00000178074	C2orf69	protein_coding	1575	0.394286	0.000126984	0.00292063	0.00184127	0.00171429	0.0340952	0.0182857	0.00209524	NA	0.0464762	0.188063	0.00425397	0.176317	NA	NA	NA	NA	NA	NA	0.0259683	0.18927	NA	NA	NA	NA	4010	2202915	537654	440040	44629
chr2	208016241	208031991	ENST00000457962	-	ENSG00000118263	KLF7	protein_coding	1575	0.438349	0.000190476	0.0015873	0.00450794	0.00609524	0.0168254	0.0143492	0.00946032	0.000634921	0.00692063	0.0071746	0.012254	NA	NA	NA	NA	NA	NA	NA	0.00920635	0.047873	NA	NA	NA	NA	17194	441847	331080	362624	42942
chr2	224794354	224810104	ENST00000233055	-	ENSG00000085449	WDFY1	protein_coding	1575	0.455746	6.34921e-05	0.00152381	0.0015873	0.00780952	0.0256508	NA	0.00755556	0.00146032	0.0426667	0.00444444	0.00273016	0.091619	NA	NA	NA	NA	NA	NA	NA	0.280952	NA	NA	NA	NA	67785	29660	961985	12016	70040
chr22	28300372	28316122	ENST00000415296	-	ENSG00000180957	PITPNB	protein_coding	1575	0.401524	0.00031746	0.00774603	0.00361905	0.00514286	0.0424127	NA	0.00647619	0.000571429	0.0180952	0.153841	0.00190476	NA	NA	NA	NA	NA	NA	NA	0.00374603	0.13581	NA	NA	NA	NA	1290033	57879	1203682	821920	59938
chr22	41487790	41503540	ENST00000263253	+	ENSG00000100393	EP300	protein_coding	1575	0.435619	6.34921e-05	0.00171429	0.00355556	NA	0.044	0.00336508	0.00984127	NA	0.0747937	0.0440635	0.0137143	NA	NA	NA	NA	NA	NA	NA	0.0101587	0.293333	NA	NA	NA	NA	73522	118771	97723	235103	88291
chr3	133953939	133969689	ENST00000427044	-	ENSG00000163785	RYK	protein_coding	1575	0.408508	0.000126984	0.00444444	0.0048254	0.00292063	0.0233651	0.0245079	0.0114921	0.000571429	0.0344127	0.248571	0.004	0.0219048	NA	NA	NA	NA	NA	NA	0.0126984	0.13327	NA	NA	NA	NA	548952	104500	389353	234885	93711
chr3	150126122	150141872	ENST00000361136	+	ENSG00000196428	TSC22D2	protein_coding	1575	0.40546	0.000190476	0.00292063	NA	0.00298413	0.0365079	0.0111111	0.0102222	0.000698413	NA	0.0088254	0.00552381	NA	NA	NA	NA	NA	NA	NA	NA	0.0871111	NA	NA	NA	NA	98451	435093	93657	437381	51491
chr3	169940153	169955903	ENST00000295797	+	ENSG00000163558	PRKCI	protein_coding	1575	0.410286	0.000126984	NA	0.00444444	0.00761905	0.0330159	0.0072381	0.0133968	0.000571429	NA	0.185397	0.00247619	0.0194921	NA	NA	NA	NA	NA	NA	0.00666667	0.316381	NA	NA	NA	NA	95319	223992	602511	40616	83616
chr3	176899511	176915261	ENST00000422442	-	ENSG00000177565	TBL1XR1	protein_coding	1575	0.437968	0.000126984	0.00444444	0.0032381	0.00692063	0.044	NA	0.0104762	0.00133333	NA	0.00609524	0.0247619	NA	NA	NA	NA	NA	NA	NA	NA	0.353587	NA	NA	NA	NA	4446253	1819749	1351833	1951049	143700
chr3	31574130	31589880	ENST00000453168	+	ENSG00000163527	STT3B	protein_coding	1575	0.38946	0.000126984	NA	0.00679365	0.00126984	0.0249524	0.0178413	0.00526984	0.00139683	0.0279365	0.0528889	0.00539683	0.027873	NA	NA	NA	NA	NA	NA	0.0048254	0.0946032	NA	NA	NA	NA	819032	838497	88186	3183512	87636
chr3	38206996	38222746	ENST00000311806	+	ENSG00000172939	OXSR1	protein_coding	1575	0.420825	6.34921e-05	0.00152381	0.00380952	0.00869841	0.0178413	0.0146667	0.00996825	NA	0.0257778	0.199746	NA	0.0440635	NA	NA	NA	NA	NA	NA	0.00120635	0.319873	NA	NA	NA	NA	60301	22484	891094	28263	89983
chr3	98604783	98620533	ENST00000326840	-	ENSG00000057019	DCBLD2	protein_coding	1575	0.389651	0.000253968	0.00298413	0.00139683	0.00177778	0.0359365	0.0107937	0.00590476	0.000571429	0.00425397	0.132127	0.0141587	0.0552381	NA	NA	NA	NA	NA	NA	0.00749206	0.0706032	NA	NA	NA	NA	268078	931454	1063160	736920	105748
chr4	71768043	71783793	ENST00000502869	+	ENSG00000173542	MOB1B	protein_coding	1575	0.435365	6.34921e-05	0.00304762	0.00311111	0.00444444	0.0247619	0.00126984	0.0140317	NA	NA	0.0950476	0.00793651	0.105778	NA	NA	NA	NA	NA	NA	0.0106667	0.347302	NA	NA	NA	NA	51221	93707	2112372	62416	72928
chr4	74108765	74124515	ENST00000561029	-	ENSG00000132466	ANKRD17	protein_coding	1575	0.381524	6.34921e-05	0.00146032	0.00184127	0.00412698	0.0552381	0.0206984	0.00888889	NA	NA	0.0857143	0.00304762	0.13181	NA	NA	NA	NA	NA	NA	0.0184127	0.129206	NA	NA	NA	NA	149043	777796	1646711	481707	156335
chr4	77610724	77626474	ENST00000486758	+	ENSG00000138771	SHROOM3	protein_coding	1575	0.425841	6.34921e-05	0.00787302	0.00171429	0.00171429	0.0253968	0.0126984	0.00501587	0.000571429	NA	0.111365	NA	NA	NA	NA	NA	NA	NA	NA	0.000825397	0.155492	NA	NA	NA	NA	220170	378441	318452	475672	52559
chr4	79697496	79713246	ENST00000389010	+	ENSG00000138756	BMP2K	protein_coding	1575	0.382921	6.34921e-05	0.00431746	0.00501587	NA	0.0290794	0.00584127	0.00653968	0.000634921	0.0675556	0.122222	NA	0.0198095	NA	NA	NA	NA	NA	NA	0.0124444	0.0900317	NA	NA	NA	NA	1368927	823552	101597	956952	103093
chr5	36226631	36242381	ENST00000506945	-	ENSG00000152620	NADKD1	protein_coding	1575	0.383365	0.00031746	0.00330159	0.00374603	0.00692063	0.0432381	0.0064127	0.00615873	NA	0.00914286	0.144952	0.00920635	NA	NA	NA	NA	NA	NA	NA	0.0119365	0.0688254	NA	NA	NA	NA	50366	863948	18239	634479	47293
chr5	54603588	54619338	ENST00000230640	+	ENSG00000039123	SKIV2L2	protein_coding	1575	0.373651	0.000126984	0.00146032	NA	NA	0.0469841	0.0183492	0.0111111	NA	0.0674921	0.372952	0.00380952	0.0325714	NA	NA	NA	NA	NA	NA	NA	0.117714	NA	0.0031746	NA	NA	1467311	140459	77094	67	117821
chr6	43044006	43059756	ENST00000230419	+	ENSG00000112655	PTK7	protein_coding	1575	0.505016	0.000126984	NA	0.00895238	0.000380952	0.0209524	NA	0.012	0.000571429	0.06	NA	NA	NA	NA	NA	NA	NA	NA	NA	0.00349206	0.301651	NA	NA	NA	NA	54913	1173	109360	16764	85451
chr6	86159809	86175559	ENST00000257770	+	ENSG00000135318	NT5E	protein_coding	1575	0.438095	6.34921e-05	0.00596825	0.0047619	0.00653968	0.0469841	0.00273016	0.00539683	NA	0.0222222	0.104889	0.00133333	0.0919365	NA	NA	NA	NA	NA	NA	0.00565079	0.0664127	NA	NA	NA	NA	1665459	1489663	15405	685910	45687
chr6	91281014	91296764	ENST00000369329	-	ENSG00000135341	MAP3K7	protein_coding	1575	0.376889	0.000126984	0.00190476	NA	0.00152381	0.0506032	0.00946032	0.00533333	NA	0.0158095	0.147746	0.00622222	NA	NA	NA	NA	NA	NA	NA	0.00514286	0.164825	NA	NA	NA	NA	727322	6040422	672609	4728608	73472
chr7	116502527	116518277	ENST00000361183	+	ENSG00000198898	CAPZA2	protein_coding	1575	0.412635	0.000380952	0.0015873	0.00165079	NA	0.0407619	NA	0.00755556	NA	0.0506032	0.0914286	0.00819048	0.0544762	NA	NA	NA	NA	NA	NA	0.00279365	0.20546	NA	NA	NA	NA	50853	64087	4446377	3743890	56788
chr7	124554287	124570037	ENST00000393329	-	ENSG00000128513	POT1	protein_coding	1575	0.353397	0.000253968	0.00146032	0.00520635	NA	0.0408889	0.0297778	0.00622222	0.00126984	0.0429841	0.482286	0.00292063	0.0793016	NA	NA	NA	NA	NA	NA	0.00177778	0.0469206	NA	NA	NA	NA	1140921	2440316	3592539	2658368	107596
chr7	138778715	138794465	ENST00000471652	-	ENSG00000105939	ZC3HAV1	protein_coding	1575	0.449143	6.34921e-05	0.00152381	0.00355556	0.00292063	0.0268571	0.00126984	0.00761905	NA	0.0535238	0.108825	0.00304762	NA	0.0773333	NA	NA	NA	NA	NA	0.012381	0.275492	NA	NA	NA	NA	33690	451850	484133	24024	49381
chr7	148395006	148410756	ENST00000409469	+	ENSG00000055130	CUL1	protein_coding	1575	0.436	0.000190476	0.00298413	0.00177778	0.00457143	0.0229841	0.00419048	0.00285714	0.000634921	0.0426032	0.0580952	0.0064127	NA	NA	NA	NA	NA	NA	NA	NA	0.0996825	NA	NA	NA	NA	388501	5306800	69457	4795728	102668
chr7	35718995	35734745	ENST00000396081	-	ENSG00000122557	HERPUD2	protein_coding	1575	0.408127	6.34921e-05	0.00165079	0.00495238	0.00330159	0.0375238	0.00907937	0.00425397	0.000571429	0.00692063	0.245587	0.00431746	0.00526984	NA	NA	NA	NA	NA	NA	0.0103492	0.210032	NA	NA	NA	NA	617092	629013	1500633	105850	62476
chr7	5447427	5463177	ENST00000399537	-	ENSG00000182095	TNRC18	protein_coding	1575	0.539365	0.00031746	NA	0.00736508	0.0123175	0.023873	0.00984127	0.0103492	NA	NA	0.119429	0.0113016	NA	NA	NA	NA	NA	NA	NA	0.00368254	0.362222	NA	NA	NA	NA	499842	52250	149691	169258	116756
chr7	6296525	6312275	ENST00000482460	-	ENSG00000008256	CYTH3	protein_coding	1575	0.435365	6.34921e-05	NA	0.00349206	0.00596825	0.0302857	0.00704762	0.00546032	0.000634921	0.00552381	0.248825	0.0114286	0.0896508	NA	NA	NA	NA	NA	NA	0.00666667	0.200508	NA	NA	NA	NA	173415	56764	71080	101850	85580
chr7	65670186	65685936	ENST00000304842	+	ENSG00000169902	TPST1	protein_coding	1575	0.431937	0.000126984	0.00793651	NA	0.00209524	0.019873	0.0193016	0.00761905	NA	0.0111111	0.22654	0.00533333	NA	NA	NA	NA	NA	NA	NA	0.0195556	0.331048	NA	NA	NA	NA	383681	50633	308366	222885	155244
chr7	79067140	79082890	ENST00000354212	-	ENSG00000187391	MAGI2	protein_coding	1575	0.369905	0.000126984	0.00304762	0.00730159	0.00457143	0.0347302	0.0126984	0.00679365	NA	NA	0.202286	0.0114921	0.0366349	NA	NA	NA	NA	NA	NA	0.0125079	0.0586667	NA	NA	NA	NA	1615143	1288963	1456069	681249	1436497
chr7	98725973	98741723	ENST00000361125	-	ENSG00000198742	SMURF1	protein_coding	1575	0.423365	6.34921e-05	0.00304762	0.00146032	0.00736508	0.0389841	0.0224127	0.0031746	NA	0.00965079	0.145524	0.0555556	0.0295238	NA	NA	NA	NA	NA	NA	0.0095873	0.126032	NA	NA	NA	NA	671296	250574	90857	181772	116659
chr8	124537696	124553446	ENST00000517956	-	ENSG00000156804	FBXO32	protein_coding	1575	0.435429	0.00031746	NA	NA	0.00615873	0.0217778	0.00933333	0.00774603	NA	0.0297143	0.00450794	0.00425397	NA	NA	NA	NA	NA	NA	NA	NA	0.164762	NA	NA	NA	NA	104741	769712	59186	227435	43317
chr8	124780696	124796446	ENST00000521166	+	ENSG00000176853	FAM91A1	protein_coding	1575	0.375302	0.000507937	0.00139683	0.00469841	NA	0.0393016	0.00577778	0.00349206	NA	0.0284444	0.0599365	0.012381	NA	NA	NA	NA	NA	NA	NA	0.00120635	0.105587	NA	NA	NA	NA	642351	326436	502462	227203	42023
chr8	52795985	52811735	ENST00000544451	-	ENSG00000168300	PCMTD1	protein_coding	1575	0.383111	0.000190476	0.00152381	0.00152381	0.0102222	0.032127	0.0148571	0.00628571	NA	0.00615873	0.0259048	0.00444444	0.0644444	NA	NA	NA	NA	NA	NA	0.004	0.0977143	NA	NA	NA	NA	2937736	723282	3797281	1952632	81595
chr8	66738807	66754557	ENST00000519626	-	ENSG00000205268	PDE7A	protein_coding	1575	0.380571	0.000126984	NA	0.00514286	NA	0.0473016	0.00742857	0.00469841	NA	0.159492	0.121397	0.00653968	0.0272381	NA	NA	NA	NA	NA	NA	0.00584127	0.0598095	NA	NA	NA	NA	168105	577264	91759	586705	94557
chr9	140513444	140529194	ENST00000462484	+	ENSG00000181090	EHMT1	protein_coding	1575	0.473714	6.34921e-05	0.00146032	0.0120635	0.00266667	0.0188571	NA	0.0168254	NA	0.0455873	0.154349	0.0128889	NA	NA	NA	NA	NA	NA	NA	0.00425397	0.46946	NA	NA	NA	NA	NA	NA	NA	NA	165401
chrX	21958691	21974441	ENST00000404933	+	ENSG00000102172	SMS	protein_coding	1575	0.450984	0.000126984	0.00146032	NA	0.00450794	0.0216508	0.00520635	0.00698413	0.00120635	0.0812698	0.149841	0.00793651	0.0299048	NA	NA	NA	NA	NA	NA	NA	0.164889	NA	NA	NA	NA	1686953	55150	1723085	1673941	54262
chr10	119119478	119134978	ENST00000334464	-	ENSG00000165650	PDZD8	protein_coding	1550	0.399097	6.45161e-05	0.00316129	0.00174194	0.00464516	0.0516129	0.0114194	0.00741935	0.000580645	0.0467097	0.0461935	0.0165161	NA	NA	NA	NA	NA	NA	NA	0.013871	0.163226	NA	NA	NA	NA	329890	629448	2357539	1732501	94978
chr10	12069523	12085023	ENST00000397053	-	ENSG00000151461	UPF2	protein_coding	1550	0.424387	0.000258065	0.0016129	0.00309677	0.00593548	0.0245161	0.0204516	0.01	0.000645161	0.0246452	0.0125806	0.00954839	NA	NA	NA	NA	NA	NA	NA	0.00412903	0.379097	NA	NA	NA	NA	391344	124549	130747	25910	123001
chr10	69819605	69835105	ENST00000373700	-	ENSG00000148634	HERC4	protein_coding	1550	0.39129	0.000387097	0.00167742	0.00367742	0.00322581	0.0235484	0.0123871	0.00587097	NA	NA	0.0154839	0.012129	NA	NA	NA	NA	NA	NA	NA	0.00690323	0.299161	NA	NA	NA	NA	4569383	207311	116958	34144	152859
chr10	70151446	70166946	ENST00000388768	-	ENSG00000204130	RUFY2	protein_coding	1550	0.414839	0.000451613	0.00154839	NA	0.00380645	0.0383871	0.0130323	0.0141935	0.000645161	0.0177419	NA	0.00658065	NA	NA	NA	NA	NA	NA	NA	NA	0.38271	NA	NA	NA	NA	34262	6874	23993	153170	63680
chr10	75936444	75951944	ENST00000372734	+	ENSG00000156110	ADK	protein_coding	1550	0.416645	6.45161e-05	0.00483871	0.00503226	0.00851613	0.0309677	0.00651613	0.00780645	NA	0.0105161	0.0972903	0.0126452	0.0403871	NA	NA	NA	NA	NA	NA	0.0103226	0.33471	NA	NA	NA	NA	609934	56530	1017284	25618	532617
chr10	93558069	93573569	ENST00000371627	+	ENSG00000107854	TNKS2	protein_coding	1550	0.418581	0.000258065	NA	NA	0.00187097	0.027871	0.0103226	0.00774194	0.000709677	0.00509677	0.10929	0.00245161	NA	NA	NA	NA	NA	NA	NA	0.00180645	0.180581	NA	NA	NA	NA	85666	283549	68275	165211	66964
chr10	93683526	93699026	ENST00000265990	+	ENSG00000095564	BTAF1	protein_coding	1550	0.38671	0.000129032	0.00309677	0.00180645	0.00122581	0.0316774	0.0101935	0.00574194	NA	0.029871	0.192	0.00167742	NA	NA	NA	NA	NA	NA	NA	0.00296774	0.112387	0.00225806	NA	NA	NA	327393	58294	84870	14268	106556
chr1	113483475	113498975	ENST00000369626	-	ENSG00000155380	SLC16A1	protein_coding	1550	0.416839	6.45161e-05	0.0103871	0.00696774	0.00174194	0.038	0.0136774	0.00716129	0.000645161	0.0352903	0.162	0.00593548	NA	NA	NA	NA	NA	NA	NA	NA	0.313677	0.00516129	NA	NA	NA	208950	740848	215607	116855	44506
chr1	146714291	146729791	ENST00000431239	+	ENSG00000131778	CHD1L	protein_coding	1550	0.406194	0.000387097	0.00309677	0.00225806	0.00141935	0.044	0.004	0.00651613	0.000709677	0.00703226	0.229484	0.00212903	0.106903	NA	NA	NA	NA	NA	NA	NA	0.133548	NA	NA	NA	NA	258890	62763	364876	70162	53150
chr1	167691187	167706687	ENST00000359523	+	ENSG00000197965	MPZL1	protein_coding	1550	0.434387	6.45161e-05	0.00322581	NA	NA	0.0400645	0.00270968	0.00748387	0.000580645	0.0203871	0.134516	0.00129032	0.148065	NA	NA	NA	NA	NA	NA	0.00741935	0.267355	NA	NA	NA	NA	174609	294605	154725	168131	69969
chr11	73293734	73309234	ENST00000064778	-	ENSG00000054965	FAM168A	protein_coding	1550	0.425226	6.45161e-05	0.002	0.00232258	0.00122581	0.022	0.02	0.0103226	NA	0.0899355	0.0675484	0.00974194	0.0276129	NA	NA	NA	NA	NA	NA	NA	0.342258	NA	NA	NA	NA	416091	77448	160715	189682	197702
chr1	179923873	179939373	ENST00000367607	+	ENSG00000135837	CEP350	protein_coding	1550	0.391677	0.000129032	0.0016129	NA	0.000903226	0.0330323	NA	0.00780645	NA	0.0665806	0.258645	0.0116129	0.0836774	NA	NA	NA	NA	NA	NA	0.00206452	0.192968	NA	NA	NA	NA	160094	34662	274924	76932	160142
chr1	180601140	180616640	ENST00000367590	+	ENSG00000143324	XPR1	protein_coding	1550	0.384065	6.45161e-05	0.00148387	0.00148387	0.000967742	0.0351613	NA	0.002	NA	0.0790968	0.0023871	0.00851613	NA	NA	NA	NA	NA	NA	NA	NA	0.146323	NA	NA	NA	0.0290968	241172	431281	301035	129118	258247
chr11	95641959	95657459	ENST00000346299	-	ENSG00000087053	MTMR2	protein_coding	1550	0.360452	0.000258065	0.00445161	0.00212903	NA	0.0456129	0.0150968	0.00535484	NA	0.047871	0.0620645	0.0247742	0.0289677	NA	NA	NA	NA	NA	NA	0.00316129	0.0795484	NA	NA	NA	NA	94505	53980	51602	465698	91413
chr11	9685624	9701124	ENST00000447399	+	ENSG00000133789	SWAP70	protein_coding	1550	0.392839	6.45161e-05	NA	0.00490323	0.004	0.0340645	0.0125806	0.0104516	NA	0.022	0.0658065	0.00529032	0.00690323	NA	NA	NA	NA	NA	NA	0.0634839	0.281419	NA	NA	NA	NA	54215	74311	50692	203379	87744
chr1	19796566	19812066	ENST00000401084	-	ENSG00000077549	CAPZB	protein_coding	1550	0.506065	0.000193548	0.0016129	0.00180645	0.00606452	0.0542581	0.0145161	0.002	0.00212903	0.00516129	0.0176774	0.000903226	NA	NA	NA	NA	NA	NA	NA	0.00406452	0.246839	NA	NA	NA	NA	133426	196639	116272	111404	146799
chr12	109109872	109125372	ENST00000261401	-	ENSG00000110880	CORO1C	protein_coding	1550	0.422323	0.000258065	0.00309677	0.00412903	0.0129032	0.0362581	0.0112903	0.00716129	NA	0.0229677	0.119161	0.010129	NA	NA	NA	NA	NA	NA	NA	0.00490323	0.157032	NA	NA	NA	NA	57702	51093	122212	365007	86487
chr12	22778009	22793509	ENST00000266517	+	ENSG00000139163	ETNK1	protein_coding	1550	0.369226	0.000129032	NA	0.00135484	0.00483871	0.0423226	0.0107097	0.00645161	NA	0.0396129	0.268774	0.00716129	0.0335484	NA	NA	NA	NA	NA	NA	0.00477419	0.162387	NA	NA	NA	NA	2530140	559407	2144948	80557	60637
chr1	235652281	235667781	ENST00000366600	-	ENSG00000162885	B3GALNT2	protein_coding	1550	0.404129	0.000258065	0.00309677	NA	NA	0.0226452	0.00993548	0.0100645	0.000774194	0.0697419	0.193484	0.00335484	0.0351613	NA	NA	NA	NA	NA	NA	NA	0.186452	NA	NA	NA	NA	136249	156563	15501	638050	54543
chr1	236958610	236974110	ENST00000366577	+	ENSG00000116984	MTR	protein_coding	1550	0.404323	0.000322581	NA	0.00954839	NA	0.0296129	NA	0.00664516	0.000580645	0.0445806	0.112	0.0036129	0.0256129	NA	NA	NA	NA	NA	NA	0.00580645	0.128065	NA	NA	NA	NA	3256574	242331	3654262	190769	108671
chr13	103249353	103264853	ENST00000376065	+	ENSG00000134900	TPP2	protein_coding	1550	0.411419	0.000193548	0.00148387	0.00696774	0.00696774	0.0252258	NA	0.00574194	0.000645161	0.0329677	0.155742	0.00541935	0.109806	NA	NA	NA	NA	NA	NA	0.00296774	0.111677	NA	NA	NA	NA	162045	880559	129109	1922250	81458
chr1	32573639	32589139	ENST00000373625	+	ENSG00000025800	KPNA6	protein_coding	1550	0.457548	0.000129032	NA	0.00574194	0.00212903	0.0191613	0.0132903	0.0145806	NA	0.161806	0.0693548	0.00812903	0.0118065	NA	NA	NA	NA	NA	NA	0.00903226	0.542387	NA	NA	NA	NA	31705	5172	68158	169651	68530
chr13	30154325	30169825	ENST00000380752	-	ENSG00000139514	SLC7A1	protein_coding	1550	0.481742	0.000129032	0.00322581	0.00225806	0.00703226	0.0303871	0.0127742	0.00503226	0.00122581	0.0314839	0.0641935	0.00425806	NA	NA	NA	NA	NA	NA	NA	0.00612903	0.0883871	NA	NA	NA	NA	836675	168719	876732	1022004	86278
chr13	45548118	45563618	ENST00000379161	-	ENSG00000083635	NUFIP1	protein_coding	1550	0.419548	0.000322581	0.00322581	0.0016129	NA	0.0290323	0.0242581	0.0110323	NA	0.113871	0.14071	0.0185806	0.0376774	NA	NA	NA	NA	NA	NA	NA	0.240387	NA	NA	NA	NA	372917	347685	369050	68	50234
chr13	49550048	49565548	ENST00000492622	+	ENSG00000102531	FNDC3A	protein_coding	1550	0.368129	0.000193548	NA	0.00425806	0.00116129	0.0372903	0.0181935	0.00696774	NA	0.0673548	0.263484	0.00677419	NA	NA	NA	NA	NA	NA	NA	0.00451613	0.129871	0.00683871	NA	NA	NA	231998	494022	292737	442732	232422
chr14	55738021	55753521	ENST00000313833	+	ENSG00000178974	FBXO34	protein_coding	1550	0.418839	0.000322581	0.00148387	0.00277419	NA	0.0313548	0.0056129	0.00677419	0.000580645	0.0835484	0.0277419	0.00425806	0.0609032	NA	NA	NA	NA	NA	NA	0.00632258	0.238323	NA	0.0114194	NA	NA	268903	125873	55087	79625	82306
chr14	93783938	93799438	ENST00000298896	-	ENSG00000011114	BTBD7	protein_coding	1550	0.41271	0.000129032	0.00367742	0.00335484	0.00645161	0.0303226	0.0056129	0.00612903	NA	0.0145806	0.214452	0.00683871	0.055871	NA	NA	NA	NA	NA	NA	0.00419355	0.238516	NA	NA	NA	NA	85979	717829	63877	748200	45464
chr15	25668628	25684128	ENST00000232165	-	ENSG00000114062	UBE3A	protein_coding	1550	0.379161	6.45161e-05	0.00335484	0.00535484	0.00116129	0.021871	0.00522581	0.00574194	0.00116129	NA	0.127806	0.00277419	0.0224516	NA	NA	NA	NA	NA	NA	0.0330323	0.154968	NA	NA	NA	NA	2557285	239731	120572	5234750	101747
chr15	63481668	63497168	ENST00000321437	+	ENSG00000166128	RAB8B	protein_coding	1550	0.408839	6.45161e-05	0.00309677	0.00651613	0.00154839	0.0232258	0.00612903	0.00380645	NA	0.0710968	0.0120645	0.0207097	NA	NA	NA	NA	NA	NA	NA	0.00174194	0.169935	NA	NA	NA	NA	48080	47408	94061	31927	78313
chr17	1288172	1303672	ENST00000264335	-	ENSG00000108953	YWHAE	protein_coding	1550	0.455032	6.45161e-05	0.00154839	0.00135484	0.00154839	0.0505161	0.0169032	0.0127742	0.000580645	0.00832258	0.00819355	NA	NA	NA	NA	NA	NA	NA	NA	0.00245161	0.434065	0.00296774	0.00470968	NA	NA	173056	21785	358282	116540	56106
chr17	74335510	74351010	ENST00000435555	-	ENSG00000161542	PRPSAP1	protein_coding	1550	0.490129	0.000387097	NA	0.00387097	0.00703226	0.0264516	0.00445161	0.0150968	0.000580645	0.00322581	0.0939355	0.00154839	NA	NA	NA	NA	NA	NA	NA	0.00193548	0.46929	NA	NA	NA	NA	7249	34602	43631	29679	42060
chr18	2997813	3013313	ENST00000584294	-	ENSG00000101577	LPIN2	protein_coding	1550	0.44929	0.000129032	0.0036129	0.00135484	0.00322581	0.034	NA	0.00677419	0.000580645	0.0156774	0.0794194	0.00664516	0.10671	NA	NA	NA	NA	NA	NA	0.0108387	0.243613	NA	NA	NA	NA	26692	2223409	59223	234214	72710
chr18	43531805	43547305	ENST00000282041	-	ENSG00000152223	EPG5	protein_coding	1550	0.420323	0.000193548	0.00464516	0.0036129	NA	0.0203871	0.0127742	0.0043871	0.000580645	0.0375484	0.241226	0.00187097	0.0210968	NA	NA	NA	NA	NA	NA	0.00574194	0.204774	NA	NA	NA	NA	4406744	16196	858830	136992	119730
chr18	55454827	55470327	ENST00000536015	-	ENSG00000081923	ATP8B1	protein_coding	1550	0.44929	6.45161e-05	0.00329032	NA	0.00864516	0.0285806	0.0117419	0.0109032	0.000580645	0.0344516	0.196258	0.00303226	NA	NA	NA	NA	NA	NA	NA	0.00529032	0.256516	NA	NA	NA	NA	141150	678154	93819	241282	156666
chr19	926037	941537	ENST00000263620	+	ENSG00000116017	ARID3A	protein_coding	1550	0.608129	0.000451613	NA	0.00148387	0.0289677	0.0518065	0.00393548	0.00664516	0.00122581	0.011871	0.042	0.0232903	NA	NA	NA	NA	NA	NA	NA	0.00193548	0.300968	NA	NA	NA	NA	18290	112384	43612	12812	46744
chr2	122391663	122407163	ENST00000409078	-	ENSG00000074054	CLASP1	protein_coding	1550	0.418581	6.45161e-05	0.00625806	0.0016129	0.00529032	0.0454839	0.00735484	0.00890323	NA	0.01	0.142	0.0063871	NA	NA	NA	NA	NA	NA	NA	0.00425806	0.308516	NA	NA	NA	NA	1386179	77357	78578	66	308944
chr2	157291802	157307302	ENST00000415049	+	ENSG00000115159	GPD2	protein_coding	1550	0.435419	0.000193548	0.00148387	0.00367742	0.00425806	0.0192258	0.00232258	0.00845161	NA	0.00941935	0.0976129	0.00464516	0.105355	0.008	NA	NA	NA	NA	NA	0.00503226	0.220258	NA	NA	NA	NA	782537	3674035	1261155	102515	75559
chr2	167217003	167232503	ENST00000409672	-	ENSG00000169432	SCN9A	protein_coding	1550	0.357613	6.45161e-05	0.00174194	NA	NA	0.0500645	0.00567742	0.00851613	NA	0.00793548	0.163097	0.0165161	NA	NA	NA	NA	NA	NA	NA	0.00993548	0.119742	NA	NA	NA	NA	382155	1578026	4924277	2080331	180808
chr2	189156396	189171896	ENST00000409843	+	ENSG00000144366	GULP1	protein_coding	1550	0.383032	0.000258065	0.00625806	0.00954839	0.00154839	0.0437419	0.00490323	0.00296774	0.000580645	NA	NA	0.0117419	0.15729	NA	NA	NA	NA	NA	NA	0.00148387	0.0534194	NA	NA	NA	NA	642702	1527884	700244	737177	303390
chr2	192109911	192125411	ENST00000418908	+	ENSG00000128641	MYO1B	protein_coding	1550	0.431806	0.000258065	0.00148387	0.0063871	0.00445161	0.0245161	0.00587097	0.00832258	0.000580645	0.0741935	0.0568387	0.00135484	NA	NA	NA	NA	NA	NA	NA	0.00122581	0.106645	NA	NA	NA	NA	392886	280135	4848395	230935	101089
chr2	216285395	216300895	ENST00000354785	-	ENSG00000115414	FN1	protein_coding	1550	0.40729	0.000709677	0.00690323	NA	0.00341935	0.0563871	0.0043871	0.00522581	0.00129032	0.013871	0.0216774	0.00509677	NA	NA	NA	NA	NA	NA	NA	0.008	0.110258	NA	NA	NA	NA	586467	506418	46399	673124	75718
chr22	21197600	21213100	ENST00000485963	-	ENSG00000241973	PI4KA	protein_coding	1550	0.451097	6.45161e-05	NA	0.00529032	0.00548387	0.0166452	0.0112258	0.00696774	NA	0.00658065	0.156774	0.0063871	0.0427097	NA	NA	NA	NA	NA	NA	0.00464516	0.383097	NA	NA	NA	NA	322930	140960	231181	191	60334
chr2	232825955	232841455	ENST00000273009	+	ENSG00000144535	DIS3L2	protein_coding	1550	0.41871	6.45161e-05	0.00735484	0.00154839	0.00541935	0.0536129	0.00122581	0.0113548	0.00122581	0.0952258	0.227742	0.006	0.0225161	NA	NA	NA	NA	NA	NA	0.00922581	0.270452	NA	NA	NA	NA	549401	152521	546823	179981	383105
chr22	41017206	41032706	ENST00000466278	-	ENSG00000196588	MKL1	protein_coding	1550	0.429871	6.45161e-05	NA	NA	0.00348387	0.0407742	0.008	0.00954839	NA	NA	0.091871	0.00367742	0.0905161	NA	NA	NA	NA	NA	NA	0.00793548	0.384516	NA	NA	NA	NA	1063846	132932	186413	220378	117117
chr2	58453007	58468507	ENST00000449070	-	ENSG00000115392	FANCL	protein_coding	1550	0.347419	0.000258065	0.00303226	0.00290323	NA	0.0436129	0.00858065	0.00529032	NA	0.0136774	0.39671	0.0102581	0.0605161	NA	NA	NA	NA	NA	NA	NA	0.026	NA	NA	NA	NA	2277209	2209794	41452	2514857	81254
chr3	123665064	123680564	ENST00000433542	-	ENSG00000175455	CCDC14	protein_coding	1550	0.361097	0.000387097	0.00787097	0.00341935	0.00193548	0.0339355	0.0223226	0.00354839	NA	0.0378065	0.125742	0.0153548	0.0532258	NA	NA	NA	NA	NA	NA	0.00419355	0.0386452	NA	NA	NA	NA	37415	801230	647582	132993	47398
chr3	128444965	128460465	ENST00000265062	+	ENSG00000075785	RAB7A	protein_coding	1550	0.433355	6.45161e-05	0.00335484	NA	0.00135484	0.0331613	0.00387097	0.00954839	NA	NA	0.0206452	0.0142581	0.0446452	NA	NA	NA	NA	NA	NA	NA	0.321742	NA	NA	NA	0.00432258	113367	215536	321446	75246	88674
chr3	141205889	141221389	ENST00000515549	+	ENSG00000155903	RASA2	protein_coding	1550	0.388065	6.45161e-05	0.00154839	0.00348387	0.00877419	0.0325806	0.0105806	0.00690323	NA	0.0314194	0.172258	0.00935484	NA	NA	NA	NA	NA	NA	NA	0.00967742	0.132129	NA	NA	NA	NA	211161	37257	417380	2097367	53526
chr3	148788841	148804341	ENST00000494055	-	ENSG00000071794	HLTF	protein_coding	1550	0.375484	0.000580645	0.00651613	NA	NA	0.0294839	0.0307742	0.00722581	0.000580645	0.0305806	0.195806	0.0143226	0.00645161	NA	NA	NA	NA	NA	NA	NA	0.248774	NA	NA	NA	NA	2501713	282463	18885	43029	55559
chr3	149530495	149545995	ENST00000392894	+	ENSG00000082996	RNF13	protein_coding	1550	0.377742	0.000322581	0.00187097	0.00645161	0.00206452	0.0338065	0.0105806	0.00754839	NA	0.0199355	0.197871	0.00651613	0.0583226	NA	NA	NA	NA	NA	NA	0.00329032	0.141677	NA	NA	NA	NA	118570	639190	112195	60209	149431
chr3	14989091	15004591	ENST00000413118	+	ENSG00000177463	NR2C2	protein_coding	1550	0.41871	0.000451613	0.00335484	0.00322581	0.0103871	0.0360645	0.0132903	0.00780645	NA	NA	0.161032	0.0369032	NA	NA	NA	NA	NA	NA	NA	0.00122581	0.166903	NA	NA	NA	NA	218641	274925	60927	768919	66134
chr3	180630090	180645590	ENST00000357559	+	ENSG00000114416	FXR1	protein_coding	1550	0.401871	0.000258065	0.00477419	0.0056129	0.00225806	0.0512903	0.00683871	0.00541935	0.00122581	0.0647742	0.0617419	0.00316129	NA	NA	NA	NA	NA	NA	NA	0.00303226	0.241742	NA	NA	NA	NA	1841200	301172	31407	1307656	64860
chr3	23244511	23260011	ENST00000425792	+	ENSG00000182247	UBE2E2	protein_coding	1550	0.37129	0.000258065	0.00451613	0.00167742	0.006	0.0401935	0.0175484	0.00316129	0.00180645	0.00503226	0.0574839	0.0208387	NA	NA	NA	NA	NA	NA	NA	NA	0.0752258	NA	NA	NA	NA	91114	3048615	649060	3016787	387202
chr3	25816030	25831530	ENST00000417874	-	ENSG00000151092	NGLY1	protein_coding	1550	0.412	0.000580645	0.00154839	NA	0.00116129	0.0346452	0.00858065	0.00432258	0.000645161	0.107032	0.17071	0.0083871	0.0083871	NA	NA	NA	NA	NA	NA	0.00251613	0.100129	NA	NA	NA	NA	85742	1425566	1769421	32	70628
chr3	32596866	32612366	ENST00000273130	-	ENSG00000144635	DYNC1LI1	protein_coding	1550	0.422387	0.000193548	NA	0.00193548	NA	0.0287097	0.00677419	0.0107097	NA	0.0211613	0.086	0.00264516	NA	NA	NA	NA	NA	NA	NA	0.00651613	0.375161	NA	NA	NA	NA	27963	425733	76033	114331	44903
chr3	33466502	33482002	ENST00000283628	-	ENSG00000153560	UBP1	protein_coding	1550	0.418452	0.000129032	0.00148387	0.0016129	0.00858065	0.0232258	0.00929032	0.00974194	NA	0.0362581	0.131871	0.00929032	0.0147742	NA	NA	NA	NA	NA	NA	0.0164516	0.202839	NA	NA	NA	NA	303308	55736	13245	358063	50376
chr3	58318607	58334107	ENST00000356151	+	ENSG00000168297	PXK	protein_coding	1550	0.450516	0.000129032	0.00367742	0.00212903	0.00322581	0.0385161	0.00812903	0.00696774	0.000645161	0.0389032	0.0820645	0.00709677	NA	NA	NA	NA	NA	NA	NA	0.0096129	0.349935	NA	NA	NA	NA	119215	12687	54749	639791	92271
chr3	73045936	73061436	ENST00000356692	+	ENSG00000163605	PPP4R2	protein_coding	1550	0.418194	0.000193548	0.00148387	0.00322581	0.0100645	0.0390323	0.00567742	0.00625806	0.000645161	0.0529677	0.0727097	0.00767742	NA	NA	NA	NA	NA	NA	NA	0.00935484	0.350065	NA	NA	NA	NA	24873	3028448	345715	148338	72414
chr4	123844229	123859729	ENST00000274008	+	ENSG00000145375	SPATA5	protein_coding	1550	0.370387	0.000516129	0.00451613	0.00129032	NA	0.0328387	0.0192903	0.00490323	NA	0.0686452	0.111548	0.00522581	NA	NA	NA	NA	NA	NA	NA	0.00748387	0.122323	NA	NA	NA	NA	2353337	24839	1700974	70	391580
chr4	134070470	134085970	ENST00000264360	+	ENSG00000138650	PCDH10	protein_coding	1550	0.381484	0.000258065	0.00464516	NA	NA	0.0407097	0.0443226	0.00541935	NA	0.00509677	0.0105161	0.0203226	NA	NA	NA	NA	0.00683871	NA	NA	0.00167742	0.00948387	NA	NA	NA	NA	5826472	4036627	1007018	4055706	42262
chr4	184020446	184035946	ENST00000403733	+	ENSG00000151718	WWC2	protein_coding	1550	0.430258	6.45161e-05	NA	NA	0.00651613	0.0386452	0.0107097	0.00903226	NA	0.0415484	0.143677	0.014	0.0225161	NA	NA	NA	NA	NA	NA	0.00509677	0.230968	NA	NA	NA	NA	305342	296269	355443	94	221484
chr4	52709166	52724666	ENST00000509376	+	ENSG00000109184	DCUN1D4	protein_coding	1550	0.439161	0.000258065	0.00193548	0.00129032	0.0108387	0.0209032	0.038129	0.00483871	0.000645161	0.0465806	0.157935	0.0250323	0.0369032	NA	NA	NA	NA	NA	NA	0.00219355	0.0554194	NA	NA	NA	NA	168426	3845332	110699	3800351	71294
chr4	72053003	72068503	ENST00000425175	+	ENSG00000080493	SLC4A4	protein_coding	1550	0.388129	6.45161e-05	0.0016129	NA	NA	0.0250323	0.0190968	0.00322581	0.000580645	0.0417419	0.0754194	0.00341935	0.0267742	NA	NA	NA	NA	NA	NA	0.00832258	0.113935	NA	NA	NA	NA	2513219	156374	1827412	347376	384801
chr5	126351000	126366500	ENST00000308660	-	ENSG00000173926	2013-03-03	protein_coding	1550	0.408968	0.000129032	NA	0.00374194	0.004	0.0349032	0.00393548	0.00470968	NA	0.0892903	0.0781935	0.00522581	0.0492903	NA	NA	NA	NA	NA	NA	0.0147097	0.0690968	NA	NA	NA	NA	395418	11749	153788	486808	163094
chr5	39059010	39074510	ENST00000357387	-	ENSG00000164327	RICTOR	protein_coding	1550	0.388452	0.000129032	0.00470968	NA	0.00767742	0.0532258	0.00251613	0.00483871	0.000580645	0.0200645	0.0768387	0.0139355	0.156	NA	NA	NA	NA	NA	NA	NA	0.0796129	NA	NA	NA	NA	439003	297265	98767	1605521	136489
chr5	61601989	61617489	ENST00000401507	+	ENSG00000068796	KIF2A	protein_coding	1550	0.408516	0.000258065	0.00329032	0.00180645	0.00845161	0.0324516	0.0112258	0.00941935	0.00116129	0.0241935	0.172839	0.00709677	NA	NA	NA	NA	NA	NA	NA	0.00832258	0.188	NA	NA	NA	NA	66583	759990	42361	1143687	79514
chr5	81032116	81047616	ENST00000507655	-	ENSG00000145687	SSBP2	protein_coding	1550	0.401871	0.000258065	0.00251613	0.00341935	0.0226452	0.0416774	0.0172258	0.010129	0.00154839	NA	0.13129	0.0116774	0.0260645	NA	NA	NA	NA	NA	NA	0.0166452	0.116323	NA	NA	NA	NA	410228	521522	398651	220227	304928
chr6	135360536	135376036	ENST00000367837	-	ENSG00000112339	HBS1L	protein_coding	1550	0.380258	0.000258065	0.00612903	0.00264516	NA	0.0230323	0.00490323	0.00329032	NA	0.0630323	0.0779355	0.00548387	0.0727097	NA	NA	NA	NA	NA	NA	0.00245161	0.131226	NA	NA	NA	NA	35466	229073	1027407	796797	94520
chr6	20197170	20212670	ENST00000541730	-	ENSG00000172197	MBOAT1	protein_coding	1550	0.435032	0.000129032	0.00148387	0.00432258	0.00496774	0.0388387	0.00845161	0.00606452	0.000580645	0.0165161	0.0347097	0.0136129	0.127742	NA	NA	NA	NA	NA	NA	0.00419355	0.150645	NA	NA	NA	NA	1907871	4437534	331755	189466	111735
chr6	34649136	34664636	ENST00000374026	-	ENSG00000196821	C6orf106	protein_coding	1550	0.429871	0.000387097	NA	NA	0.00645161	0.0469677	0.0129032	0.00819355	0.000645161	0.0207742	0.106387	0.00309677	NA	NA	NA	NA	NA	NA	NA	0.0235484	0.352839	0.013871	0.0199355	NA	NA	230734	180918	410628	60234	109571
chr6	42404289	42419789	ENST00000372917	-	ENSG00000124496	TRERF1	protein_coding	1550	0.464839	0.000129032	0.00483871	0.00322581	0.0114839	0.0286452	0.00980645	0.0110323	0.000709677	NA	0.125355	NA	0.0123226	NA	NA	NA	NA	NA	NA	0.00748387	0.201032	NA	NA	NA	NA	194156	244543	331145	111970	227120
chr6	45389773	45405273	ENST00000478660	+	ENSG00000124813	RUNX2	protein_coding	1550	0.407742	0.000129032	0.00225806	0.00206452	0.00780645	0.0452903	0.00612903	0.00535484	NA	NA	0.0177419	0.0176774	NA	NA	NA	NA	NA	NA	NA	0.0161935	0.0815484	NA	NA	NA	NA	2015751	971612	758693	44103	241836
chr7	139462077	139477577	ENST00000428878	-	ENSG00000064393	HIPK2	protein_coding	1550	0.451097	0.000129032	0.00148387	NA	0.00529032	0.0175484	NA	0.00825806	0.00135484	0.161871	0.125935	0.0143871	NA	NA	NA	NA	NA	NA	NA	NA	0.0682581	NA	NA	NA	NA	643112	245971	329374	399483	220202
chr8	121442142	121457642	ENST00000518696	-	ENSG00000172172	MRPL13	protein_coding	1550	0.35729	0.000258065	0.00477419	0.00212903	0.00129032	0.0519355	NA	0.00464516	NA	0.0678065	0.32329	0.00141935	NA	NA	NA	NA	NA	NA	NA	NA	0.0835484	NA	NA	NA	NA	549472	90342	980964	23	49966
chr8	16884747	16900247	ENST00000318063	+	ENSG00000155970	EFHA2	protein_coding	1550	0.417613	6.45161e-05	0.00309677	0.00535484	NA	0.0245161	0.0165806	0.00277419	NA	0.161419	0.159355	NA	0.234258	NA	NA	NA	NA	NA	NA	0.00735484	0.114968	NA	NA	NA	NA	89088	1260589	161992	3512318	95406
chr8	23246253	23261753	ENST00000389131	-	ENSG00000134013	LOXL2	protein_coding	1550	0.458	0.000129032	0.0076129	0.00167742	0.00819355	0.0287742	0.00832258	0.00722581	0.000645161	0.00909677	0.189548	0.0083871	0.0739355	NA	NA	NA	NA	NA	NA	0.0171613	0.137161	NA	NA	NA	NA	139073	24911	67961	124609	107051
chr8	28747911	28763411	ENST00000444075	+	ENSG00000147421	HMBOX1	protein_coding	1550	0.390645	0.000193548	0.00316129	0.00148387	0.00580645	0.0212258	0.00458065	0.00419355	0.000645161	0.0901935	0.0103226	0.0096129	0.0198065	NA	NA	NA	NA	NA	NA	0.00696774	0.136194	NA	NA	NA	NA	1165010	136709	402667	213	162331
chr8	38854505	38870005	ENST00000487273	+	ENSG00000168615	ADAM9	protein_coding	1550	0.40471	0.000193548	0.00451613	0.00167742	0.00180645	0.032129	0.00174194	0.00683871	0.000580645	0.0383871	0.0773548	0.0043871	0.136903	NA	NA	NA	NA	NA	NA	0.00154839	0.178323	NA	NA	NA	NA	70544	8324	2224970	464	108015
chr8	67579831	67595331	ENST00000520044	+	ENSG00000104205	SGK3	protein_coding	1550	0.407613	0.000387097	0.00154839	0.00380645	0.00516129	0.0369032	0.0207742	0.00774194	NA	0.0203226	0.0879355	0.00258065	NA	NA	NA	NA	NA	NA	NA	0.0130323	0.346	NA	NA	NA	NA	4821	198787	59800	379	126237
chr8	9413424	9428924	ENST00000520408	+	ENSG00000173273	TNKS	protein_coding	1550	0.369161	0.000129032	0.00619355	0.0043871	0.006	0.0469677	0.00245161	0.00509677	NA	0.0807742	0.145355	NA	0.0540645	NA	NA	NA	NA	NA	NA	0.00322581	0.110194	NA	NA	NA	NA	145757	522575	1169459	404272	154495
chr9	13264089	13279589	ENST00000319217	-	ENSG00000107186	MPDZ	protein_coding	1550	0.396065	0.000258065	0.00316129	0.00548387	0.00503226	0.0227742	0.0139355	0.00664516	NA	0.0389032	0.0416774	0.0199355	0.0754194	NA	NA	NA	NA	NA	NA	0.00406452	0.0651613	NA	NA	NA	NA	5439790	1331479	416530	2143192	173886
chr9	20607042	20622542	ENST00000380338	-	ENSG00000171843	MLLT3	protein_coding	1550	0.380903	0.000193548	0.00329032	0.00290323	0.01	0.0282581	0.00167742	0.00974194	0.00458065	0.0381935	0.0918065	0.0178065	NA	NA	NA	NA	NA	NA	NA	0.0125806	0.0632258	NA	NA	NA	NA	80202	383822	1130042	35766	280879
chrX	44732757	44748257	ENST00000377967	+	ENSG00000147050	KDM6A	protein_coding	1550	0.406903	0.000193548	NA	NA	0.00458065	0.0394839	0.0144516	0.0136774	NA	0.0140645	0.0419355	0.00722581	NA	NA	NA	NA	NA	NA	NA	0.0183871	0.295355	0.00387097	NA	NA	NA	1533866	3523233	832827	330536	239090
chrX	64887537	64903037	ENST00000360270	+	ENSG00000147065	MSN	protein_coding	1550	0.452065	6.45161e-05	0.00470968	0.00122581	0.00270968	0.0184516	NA	0.00516129	NA	NA	0.0427097	NA	NA	NA	NA	NA	NA	NA	NA	0.00335484	0.192839	NA	NA	NA	NA	1836336	7263627	887944	115236	74254
chr10	26727132	26742382	ENST00000376236	+	ENSG00000077420	APBB1IP	protein_coding	1525	0.406557	0.000131148	0.00183607	0.00839344	0.00190164	0.0476721	0.0188852	0.00583607	NA	0.016	0.0895738	0.00760656	NA	NA	NA	NA	NA	NA	NA	0.016	0.214164	NA	NA	NA	NA	111661	1411539	268392	1485599	129600
chr10	86184695	86199945	ENST00000543283	+	ENSG00000107771	FAM190B	protein_coding	1525	0.369311	0.000262295	0.00334426	0.00196721	NA	0.0358689	0.0295738	0.00714754	NA	0.0525246	0.309049	0.00327869	NA	NA	NA	NA	NA	NA	NA	0.011541	0.136852	NA	NA	NA	NA	2291700	271384	1970317	4219367	88628
chr10	90639491	90654741	ENST00000371926	+	ENSG00000138134	STAMBPL1	protein_coding	1525	0.393049	0.000262295	0.00622951	0.00144262	0.0015082	0.0228852	0.00859016	0.00452459	NA	0.0274754	0.148656	0.00819672	NA	NA	NA	NA	NA	NA	NA	0.00662295	0.0667541	NA	NA	NA	NA	70796	910959	15339	1061574	43753
chr10	99243263	99258513	ENST00000370782	-	ENSG00000155229	MMS19	protein_coding	1525	0.431869	0.000131148	NA	0.00229508	0.00459016	0.0300328	0.0158689	0.0112131	0.000590164	0.0220984	0.207213	0.00229508	NA	NA	NA	NA	NA	NA	NA	0.00209836	0.338492	NA	NA	NA	NA	12745	115796	1386	254	40432
chr11	11862970	11878220	ENST00000339865	+	ENSG00000170242	USP47	protein_coding	1525	0.386885	0.000131148	0.00636066	0.00380328	0.000393443	0.032459	0.00262295	0.00819672	0.00104918	0.0685246	0.281049	NA	0.0246557	NA	NA	NA	NA	NA	NA	0.00491803	0.107934	NA	NA	NA	NA	229167	962147	81572	488066	117900
chr1	112938803	112954053	ENST00000271277	+	ENSG00000143079	CTTNBP2NL	protein_coding	1525	0.408262	0.000131148	0.00301639	0.00183607	0.00144262	0.0298361	0.00255738	0.00465574	0.000655738	0.00308197	0.0571148	0.00531148	0.0241311	NA	NA	NA	NA	NA	NA	0.00432787	0.293246	NA	NA	NA	NA	31236	628604	87337	640384	64983
chr1	116519119	116534369	ENST00000369503	+	ENSG00000163393	SLC22A15	protein_coding	1525	0.409377	6.55738e-05	0.00163934	0.00636066	0.004	0.0310164	0.00819672	0.00714754	0.000655738	0.0291148	0.0997377	0.00406557	0.0304262	NA	NA	NA	NA	NA	NA	0.00557377	0.130557	NA	NA	NA	NA	356675	278274	376367	638262	93556
chr11	28114605	28129855	ENST00000263181	-	ENSG00000121621	KIF18A	protein_coding	1525	0.357377	0.000262295	0.0015082	0.00196721	0.00321311	0.0349508	0.012	0.00629508	NA	0.0464262	0.221377	0.00465574	0.0493115	NA	NA	NA	NA	NA	NA	0.00537705	0.110295	NA	NA	NA	NA	346250	3324093	1071223	2214793	87688
chr11	58330443	58345693	ENST00000528489	-	ENSG00000110031	LPXN	protein_coding	1525	0.386689	0.000262295	0.00163934	NA	0.00144262	0.0266885	0.00419672	0.00609836	NA	0.17423	0.0881311	0.00131148	0.0015082	NA	NA	NA	NA	NA	NA	0.00144262	0.182426	NA	NA	NA	0.00622951	30115	255846	719041	893	51181
chr1	165723167	165738417	ENST00000367881	-	ENSG00000143183	TMCO1	protein_coding	1525	0.386164	0.000393443	NA	0.00177049	NA	0.0241967	0.00531148	0.00360656	0.000590164	0.00918033	0.159279	0.00268852	0.00970492	NA	NA	NA	NA	NA	NA	0.00537705	0.253836	NA	NA	NA	NA	30517	1087331	73045	58314	42385
chr1	167190066	167205316	ENST00000367866	+	ENSG00000143190	POU2F1	protein_coding	1525	0.404131	6.55738e-05	0.00340984	NA	0.0082623	0.0264918	0.0133115	0.00681967	0.00118033	0.0537705	0.0569836	0.0190164	0.00498361	NA	NA	NA	NA	NA	NA	0.00642623	0.13823	NA	NA	NA	NA	461120	366357	280184	344412	206516
chr1	168091571	168106821	ENST00000367835	-	ENSG00000143147	GPR161	protein_coding	1525	0.46518	0.000262295	0.00144262	0.00144262	0.0137049	0.0283934	0.0104918	0.00760656	0.000590164	0.0241311	0.177377	0.00478689	0.0783607	NA	NA	NA	NA	NA	NA	0.0198689	0.200459	NA	NA	NA	NA	160514	994947	21738	41349	52305
chr1	171454651	171469901	ENST00000392078	+	ENSG00000117523	PRRC2C	protein_coding	1525	0.400656	0.000131148	0.00301639	NA	0.00301639	0.0285246	0.013377	0.00268852	NA	0.0118689	0.0612459	0.0027541	0.0443934	NA	NA	NA	NA	NA	NA	0.00511475	0.26741	NA	0.0192787	NA	NA	256109	143428	174644	1410772	106335
chr11	71776483	71791733	ENST00000393695	-	ENSG00000137497	NUMA1	protein_coding	1525	0.439279	0.00052459	NA	0.00163934	0.00360656	0.0331803	0.00570492	0.00885246	NA	0.0356721	0.212918	NA	0.0376393	NA	NA	NA	NA	NA	NA	0.00262295	0.305836	NA	NA	NA	NA	592256	16604	37768	55037	77823
chr11	77516813	77532063	ENST00000308488	-	ENSG00000048649	RSF1	protein_coding	1525	0.419344	0.000131148	0.00459016	0.00367213	0.00170492	0.0278689	0.0142951	0.0052459	NA	0.0544918	0.0387541	0.00190164	NA	NA	NA	NA	NA	NA	NA	0.004	0.209049	NA	NA	NA	NA	143212	57702	170662	144	161022
chr11	82767715	82782965	ENST00000534141	-	ENSG00000137502	RAB30	protein_coding	1525	0.414623	0.000131148	0.00183607	0.0015082	0.00288525	0.0361311	NA	0.00865574	0.00118033	0.00760656	0.233443	NA	0.0384918	NA	NA	NA	NA	NA	NA	0.00491803	0.231803	NA	NA	NA	NA	131408	189536	97266	142	92655
chr1	206858289	206873539	ENST00000294981	+	ENSG00000162889	MAPKAPK2	protein_coding	1525	0.502098	0.000131148	0.00163934	0.00498361	0.00740984	0.0351475	0.012	0.00636066	0.000655738	0.0238689	0.0152131	0.0165246	0.0268852	NA	NA	NA	NA	NA	NA	0.0129836	0.0788852	NA	NA	NA	NA	328330	35747	318904	72385	47919
chr12	117348761	117364011	ENST00000309909	+	ENSG00000174989	FBXW8	protein_coding	1525	0.44518	6.55738e-05	0.0015082	0.00819672	0.00163934	0.0303607	0.00767213	0.00714754	NA	0.130361	0.101115	0.00196721	0.0754098	NA	NA	NA	NA	NA	NA	0.00177049	0.243213	NA	NA	NA	NA	1065744	2498124	192823	172918	117680
chr1	235476284	235491534	ENST00000349213	-	ENSG00000054267	ARID4B	protein_coding	1525	0.423082	0.000262295	0.00170492	0.00157377	0.00583607	0.0382295	NA	0.00852459	NA	0.0175082	0.125705	0.0142951	NA	NA	NA	NA	NA	NA	NA	0.00144262	0.336262	NA	NA	NA	NA	98103	118998	931739	218	161324
chr12	48484841	48500091	ENST00000549518	-	ENSG00000079387	SENP1	protein_coding	1525	0.412525	0.000590164	0.00314754	NA	NA	0.0277377	0.0184918	0.008	NA	0.057377	0.0116721	0.0181639	NA	NA	NA	NA	NA	NA	NA	NA	0.348918	NA	NA	NA	NA	161277	41480	97430	708123	60986
chr12	88959378	88974628	ENST00000347404	-	ENSG00000049130	KITLG	protein_coding	1525	0.384066	6.55738e-05	0.00485246	0.00190164	0.00308197	0.0350164	0.00465574	0.00616393	0.000655738	NA	0.0100984	0.0122623	NA	NA	NA	NA	NA	NA	NA	0.0133115	0.159016	NA	NA	NA	NA	398635	767208	340964	1128103	84269
chr12	96252747	96267997	ENST00000552085	+	ENSG00000139343	SNRPF	protein_coding	1525	0.374689	0.000459016	0.0064918	0.00347541	0.0015082	0.0328525	0.00393443	0.00334426	NA	0.0410492	0.213574	0.00721311	NA	NA	NA	NA	NA	NA	NA	0.0012459	0.122557	NA	NA	NA	NA	295459	343134	101863	68211	44859
chr12	97301001	97316251	ENST00000266742	+	ENSG00000139350	NEDD1	protein_coding	1525	0.370951	0.000393443	0.0015082	NA	0.00137705	0.0481967	0.00786885	0.00609836	NA	0.0118033	0.0967213	0.0104262	NA	NA	NA	NA	NA	NA	NA	0.00229508	0.108262	NA	NA	NA	NA	1568349	639395	1506617	506635	46128
chr13	100153671	100168921	ENST00000376387	+	ENSG00000125304	TM9SF2	protein_coding	1525	0.397443	0.000131148	0.00157377	0.00170492	0.0064918	0.0434754	0.00393443	0.0055082	0.000590164	0.0672787	0.0365902	0.00177049	0.026623	NA	NA	NA	NA	NA	NA	0.00255738	0.10682	NA	NA	NA	NA	101641	114918	988746	415011	61974
chr13	37479652	37494902	ENST00000483941	-	ENSG00000120693	SMAD9	protein_coding	1525	0.420393	0.000131148	0.004	NA	0.0119344	0.028459	0.00957377	0.00937705	0.00242623	0.0292459	0.149836	0.0141639	NA	NA	NA	NA	NA	NA	NA	0.00780328	0.138361	NA	NA	NA	NA	510585	29005	51162	79775	41303
chr13	76041000	76056250	ENST00000377625	-	ENSG00000136111	TBC1D4	protein_coding	1525	0.421246	6.55738e-05	NA	0.0067541	0.00209836	0.0309508	0.0148197	0.00859016	NA	0.081377	0.0415738	0.00380328	NA	NA	NA	NA	NA	NA	NA	0.00367213	0.210164	NA	NA	NA	NA	2659906	43099	2364574	67676	197441
chr14	31661760	31677010	ENST00000553700	-	ENSG00000092148	HECTD1	protein_coding	1525	0.409508	0.000196721	0.00491803	0.00183607	0.00609836	0.0400656	0.00865574	0.00832787	NA	0.0949508	0.146623	0.00852459	NA	NA	NA	NA	NA	NA	NA	NA	0.254623	NA	NA	NA	NA	141403	83983	74372	353580	107686
chr14	96968710	96983960	ENST00000216277	+	ENSG00000090060	PAPOLA	protein_coding	1525	0.395082	0.000196721	0.00327869	0.00281967	0.00498361	0.0182951	0.018623	0.00616393	NA	0.12918	0.0667541	0.00321311	NA	NA	NA	NA	NA	NA	NA	0.0012459	0.180984	NA	NA	NA	NA	254973	115147	2855372	139032	64738
chr14	97263641	97278891	ENST00000216639	+	ENSG00000100749	VRK1	protein_coding	1525	0.38859	6.55738e-05	NA	NA	0.00295082	0.0366557	0.00327869	0.00845902	0.000590164	0.0777705	0.268852	0.00590164	0.0368525	NA	NA	NA	NA	NA	NA	0.0133115	0.092459	NA	NA	NA	0.0175738	2644097	230188	2560441	433963	84309
chr15	26093620	26108870	ENST00000555815	-	ENSG00000206190	ATP10A	protein_coding	1525	0.48682	0.000262295	0.00485246	0.0027541	0.012	0.0291148	NA	0.00734426	0.00118033	0.026623	0.127148	0.00268852	0.113967	NA	NA	NA	NA	NA	NA	0.0101639	0.0796721	NA	NA	NA	NA	384695	2247317	545314	4810008	186450
chr15	36871812	36887062	ENST00000566621	+	ENSG00000186073	C15orf41	protein_coding	1525	0.37882	6.55738e-05	0.00452459	0.012459	NA	0.0189508	0.00977049	0.00767213	0.000721311	0.106098	0.0886557	0.00806557	NA	NA	NA	NA	NA	NA	NA	0.00603279	0.132	NA	NA	NA	NA	1633239	2349460	244831	1033408	230612
chr15	37378254	37393504	ENST00000340545	-	ENSG00000134138	MEIS2	protein_coding	1525	0.44059	0.000786885	0.0015082	0.00144262	0.0129836	0.0342295	0.0180328	0.0100984	0.00144262	NA	NA	0.0500328	NA	NA	NA	NA	NA	NA	NA	0.0153443	0.0108852	NA	NA	NA	NA	174770	2699426	251055	1151547	210271
chr15	49088088	49103338	ENST00000380950	-	ENSG00000103995	CEP152	protein_coding	1525	0.369902	0.000459016	0.00334426	0.00177049	0.00281967	0.0373115	NA	0.00668852	0.000786885	0.0331803	0.0802623	0.00209836	NA	NA	NA	NA	NA	NA	NA	0.00222951	0.0485246	NA	NA	NA	NA	125353	177496	427768	66951	73206
chr15	59026927	59042177	ENST00000260408	-	ENSG00000137845	ADAM10	protein_coding	1525	0.39259	0.000131148	0.00314754	0.00327869	0.00845902	0.0455738	0.0102951	0.00878689	0.00137705	0.0478033	0.0149508	0.0142951	NA	NA	0.0250492	NA	NA	NA	NA	0.00163934	0.150754	NA	NA	NA	NA	16853	129066	1000621	21215	154774
chr15	64110891	64126141	ENST00000561400	-	ENSG00000103657	HERC1	protein_coding	1525	0.398098	6.55738e-05	0.00177049	0.00170492	0.0015082	0.0289836	0.0140328	0.00518033	NA	0.0128525	0.36459	0.00177049	NA	NA	NA	NA	NA	NA	NA	0.00721311	0.232787	NA	NA	NA	NA	193115	73093	202478	261941	137818
chr16	53737875	53753125	ENST00000471389	+	ENSG00000140718	FTO	protein_coding	1525	0.365705	6.55738e-05	0.00177049	0.0012459	NA	0.026623	0.0205246	0.00878689	NA	0.0401311	0.326689	NA	0.0301639	NA	NA	NA	NA	NA	NA	0.00616393	0.101902	NA	NA	NA	NA	1187235	212315	539336	104	417978
chr17	30469473	30484723	ENST00000333942	+	ENSG00000126858	RHOT1	protein_coding	1525	0.446689	0.000327869	0.00144262	NA	0.00406557	0.0321967	0.00577049	0.0118689	0.000590164	0.00885246	0.0491803	0.0122623	0.00963934	NA	NA	NA	NA	NA	NA	0.0206557	0.44118	NA	NA	NA	NA	167748	88954	145986	240744	83316
chr17	64172947	64188197	ENST00000535342	-	ENSG00000154240	CEP112	protein_coding	1525	0.391279	0.000327869	0.0064918	0.0015082	0.00262295	0.0363934	0.00754098	0.0037377	NA	0.0361967	0.405115	0.00465574	NA	NA	NA	NA	NA	NA	NA	0.00708197	0.149508	NA	NA	NA	NA	590457	878356	1614135	110728	556541
chr17	76374735	76389985	ENST00000262764	+	ENSG00000087157	PGS1	protein_coding	1525	0.495213	0.000262295	0.00157377	0.00177049	NA	0.0201311	0.00157377	0.00904918	0.0012459	NA	0.0257705	NA	NA	NA	NA	NA	NA	NA	NA	0.00504918	0.351869	NA	NA	NA	NA	605515	153019	255394	18577	45900
chr17	79588922	79604172	ENST00000331134	-	ENSG00000182446	NPLOC4	protein_coding	1525	0.484	0.000262295	0.00157377	0.00196721	0.00281967	0.0281967	NA	0.015541	NA	NA	0.0845246	0.00170492	NA	NA	NA	NA	NA	NA	NA	0.0153443	0.560525	NA	NA	NA	NA	44743	27893	60016	5176	80259
chr18	19321281	19336531	ENST00000261537	+	ENSG00000101752	MIB1	protein_coding	1525	0.404787	6.55738e-05	0.00327869	0.010623	0.00721311	0.0263607	0.0108852	0.00760656	0.000590164	0.100262	0.142295	0.00957377	0.0253115	NA	NA	NA	NA	NA	NA	0.0114098	0.246557	NA	NA	NA	NA	1152013	111073	1514697	36515	129637
chr18	33632269	33647519	ENST00000357384	-	ENSG00000141425	RPRD1A	protein_coding	1525	0.397967	0.000262295	0.00459016	NA	0.00301639	0.0422295	0.0082623	0.00767213	NA	0.0523934	0.24623	0.00452459	0.109115	NA	NA	NA	NA	NA	NA	0.00452459	0.210885	NA	NA	NA	NA	529564	40974	48269	62317	77670
chr1	92336537	92351787	ENST00000212355	-	ENSG00000069702	TGFBR3	protein_coding	1525	0.444393	6.55738e-05	0.0015082	0.0067541	0.00314754	0.0340328	0.00990164	0.0114098	0.000721311	NA	0.0681967	0.00596721	NA	NA	NA	NA	NA	NA	NA	0.00596721	0.285639	NA	NA	NA	NA	441361	360167	202452	143745	205885
chr19	45349393	45364643	ENST00000252483	+	ENSG00000130202	PVRL2	protein_coding	1525	0.538623	6.55738e-05	0.00308197	0.0082623	0.024918	0.0264262	0.00760656	0.0118033	NA	NA	0.0977049	0.0141639	0.0300328	NA	NA	NA	NA	0.0326557	NA	0.00478689	0.370033	NA	NA	NA	NA	5083	24715	185364	344819	43092
chr20	30865467	30880717	ENST00000375712	+	ENSG00000101350	KIF3B	protein_coding	1525	0.444393	0.000131148	0.00157377	0.00393443	0.0015082	0.0304918	NA	0.00963934	NA	0.0428197	0.155672	0.00183607	NA	NA	NA	NA	NA	NA	NA	0.00295082	0.476918	NA	NA	NA	NA	40679	39000	125394	69921	57347
chr20	31316564	31331814	ENST00000446419	-	ENSG00000149600	COMMD7	protein_coding	1525	0.483803	6.55738e-05	NA	0.00131148	0.00865574	0.028459	0.00465574	0.0117377	NA	0.0411803	0.0263607	0.00209836	0.0236721	NA	NA	NA	NA	NA	NA	0.00845902	0.66741	NA	NA	NA	NA	220526	614830	264692	18376	41320
chr20	33665424	33680674	ENST00000252015	-	ENSG00000100991	TRPC4AP	protein_coding	1525	0.410426	0.000131148	0.00170492	0.00504918	0.00439344	0.0282623	NA	0.0158033	NA	0.0064918	0.269311	0.00137705	NA	NA	NA	NA	NA	NA	NA	0.041377	0.354689	NA	NA	NA	NA	62399	22485	124905	79099	90467
chr20	35807449	35822699	ENST00000237530	+	ENSG00000118705	RPN2	protein_coding	1525	0.461508	0.000196721	0.00157377	NA	0.00321311	0.020459	0.00616393	0.0125902	NA	0.00832787	0.245115	NA	0.0411148	NA	NA	NA	NA	NA	NA	0.00485246	0.409836	NA	NA	NA	NA	70601	566489	298369	83039	62573
chr21	38445526	38460776	ENST00000492275	+	ENSG00000182670	TTC3	protein_coding	1525	0.389311	0.000262295	0.00491803	0.00222951	NA	0.0403934	0.00688525	0.0077377	0.00137705	0.0587541	0.43482	0.00577049	NA	NA	NA	NA	NA	NA	NA	0.00177049	0.131148	NA	NA	NA	NA	95428	656401	110199	68	62185
chr21	45432200	45447450	ENST00000380221	+	ENSG00000160218	TRAPPC10	protein_coding	1525	0.450295	6.55738e-05	0.00157377	NA	NA	0.0277377	0.0131148	0.00432787	NA	0.0461639	0.130689	0.00996721	0.0335738	NA	NA	NA	NA	NA	NA	0.00557377	0.251869	NA	NA	NA	NA	55007	24725	276626	235941	47943
chr2	152266397	152281647	ENST00000444746	+	ENSG00000080345	RIF1	protein_coding	1525	0.414492	0.00052459	0.00347541	0.00760656	0.00144262	0.0314754	0.00504918	0.0077377	0.0012459	0.141574	0.0974426	NA	NA	NA	NA	NA	NA	NA	NA	0.00131148	0.301902	NA	NA	NA	NA	885353	2721261	351082	119967	65505
chr2	153191751	153207001	ENST00000288670	+	ENSG00000157827	FMNL2	protein_coding	1525	0.448852	6.55738e-05	0.00629508	0.0027541	0.00491803	0.0250492	0.0113443	0.00616393	0.00118033	0.0249836	0.0478689	0.0064918	NA	NA	NA	NA	NA	NA	NA	0.00642623	0.199869	NA	NA	NA	NA	342655	857891	276355	159245	314597
chr2	162915802	162931052	ENST00000360534	-	ENSG00000197635	DPP4	protein_coding	1525	0.419344	0.000262295	0.00465574	0.00177049	0.0042623	0.0212459	0.0102295	0.00845902	NA	NA	0.166557	0.0200656	0.13718	NA	NA	NA	NA	NA	NA	NA	0.0864262	NA	NA	NA	NA	1540734	96147	622826	6381782	82301
chr2	172002160	172017410	ENST00000409443	-	ENSG00000198586	TLK1	protein_coding	1525	0.396	0.000393443	0.00157377	0.00144262	0.00334426	0.0443934	0.00308197	0.00963934	NA	0.0270164	0.064459	0.0291148	0.0169836	NA	NA	NA	NA	NA	NA	0.0092459	0.217115	0.00629508	NA	NA	NA	1296057	156502	153767	273350	164176
chr2	183888336	183903586	ENST00000360982	-	ENSG00000061676	NCKAP1	protein_coding	1525	0.372656	0.000196721	0.0015082	0.00295082	0.0123934	0.0242623	0.0156721	0.0103607	NA	0.0557377	0.0196066	0.0142951	NA	NA	NA	NA	NA	NA	NA	0.00668852	0.179344	NA	NA	NA	NA	2991806	4425371	220331	85496	113981
chr22	32043168	32058418	ENST00000439502	-	ENSG00000241878	PISD	protein_coding	1525	0.464984	0.000196721	0.00177049	0.0015082	0.00183607	0.0299672	0.0105574	0.00727869	0.00118033	0.0131148	0.138492	NA	0.059082	NA	NA	NA	NA	NA	NA	0.00327869	0.460197	NA	NA	NA	NA	132544	18915	3884	91518	43329
chr2	27805897	27821147	ENST00000379717	+	ENSG00000243943	ZNF512	protein_coding	1525	0.420131	0.000196721	NA	0.0132459	NA	0.0222951	NA	0.00662295	NA	0.0317377	0.402033	0.00203279	NA	0.0897705	NA	NA	NA	NA	NA	0.00537705	0.223803	NA	NA	NA	NA	5617	136549	27781	87771	40064
chr2	56411258	56426508	ENST00000407595	+	ENSG00000055813	CCDC85A	protein_coding	1525	0.448459	0.000262295	0.00183607	0.00144262	0.00734426	0.0464918	0.00295082	0.00596721	0.00177049	0.0258361	0.0956066	0.00465574	NA	NA	NA	NA	NA	NA	NA	0.00157377	0.0412459	NA	NA	NA	NA	1822518	639042	1935119	259960	202050
chr2	69240310	69255560	ENST00000303714	+	ENSG00000169604	ANTXR1	protein_coding	1525	0.410098	6.55738e-05	NA	0.00321311	0.00183607	0.0348197	0.0107541	0.0077377	NA	0.058623	0.164525	NA	0.0516721	NA	NA	NA	NA	NA	NA	0.0266885	0.0549508	NA	NA	NA	NA	50503	433016	266590	545920	236149
chr2	69969106	69984356	ENST00000394295	+	ENSG00000196975	ANXA4	protein_coding	1525	0.443475	6.55738e-05	0.00163934	NA	0.00301639	0.028459	0.00465574	0.00977049	0.000655738	0.0691803	0.0781639	0.00334426	0.0512787	NA	NA	NA	NA	NA	0.00452459	0.0120656	0.298885	NA	NA	NA	NA	47711	492647	342061	98129	84490
chr3	107241783	107257033	ENST00000415149	+	ENSG00000114439	BBX	protein_coding	1525	0.408328	0.000393443	0.00170492	NA	0.00898361	0.0287213	0.0135738	0.00662295	0.000590164	0.0262951	0.0132459	0.0436066	NA	NA	NA	NA	NA	NA	NA	0.00681967	0.0859672	NA	NA	NA	NA	1026553	195972	480157	1653896	288388
chr3	124591424	124606674	ENST00000465464	-	ENSG00000082781	ITGB5	protein_coding	1525	0.466623	0.000196721	0.00340984	0.0015082	0.00780328	0.016	0.008	0.0101639	NA	0.0228197	0.229311	0.0192131	NA	NA	NA	NA	NA	NA	NA	0.00170492	0.213443	NA	NA	NA	NA	886419	77879	98555	1816443	66496
chr3	133365487	133380737	ENST00000260810	-	ENSG00000163781	TOPBP1	protein_coding	1525	0.372197	0.000590164	NA	NA	NA	0.0393443	0.0266885	0.00793443	NA	0.00780328	0.192393	0.00288525	NA	NA	NA	NA	NA	NA	NA	0.00419672	0.204066	NA	NA	NA	NA	899434	495240	31619	122139	61320
chr3	149360638	149375888	ENST00000360632	-	ENSG00000018408	WWTR1	protein_coding	1525	0.43318	0.000393443	0.00308197	0.00360656	0.00360656	0.0208525	0.00970492	0.00878689	0.00144262	NA	0.0672787	0.00262295	NA	NA	NA	NA	NA	NA	NA	0.011541	0.200131	NA	NA	NA	NA	240320	80368	444583	154586	137856
chr3	167798513	167813763	ENST00000470487	-	ENSG00000173905	GOLIM4	protein_coding	1525	0.398098	6.55738e-05	0.00531148	NA	0.00314754	0.0318033	0.00144262	0.00596721	0.000590164	0.0597377	0.0677377	0.00688525	0.155279	NA	NA	NA	NA	NA	NA	NA	0.101049	NA	NA	NA	NA	321112	1668634	6803968	1677089	87298
chr3	182511288	182526538	ENST00000323116	+	ENSG00000058063	ATP11B	protein_coding	1525	0.382689	6.55738e-05	0.00616393	0.00452459	0.00340984	0.0238689	0.00681967	0.00983607	NA	0.0503607	0.250426	0.0064918	NA	NA	NA	NA	NA	NA	NA	0.00865574	0.157443	NA	NA	NA	NA	614107	1810749	109270	1803726	128135
chr3	196466728	196481978	ENST00000327134	+	ENSG00000180370	PAK2	protein_coding	1525	0.409836	0.000131148	NA	0.00295082	0.00334426	0.035082	0.0120656	0.0104918	0.000918033	0.0215082	0.135869	0.00459016	NA	NA	NA	NA	NA	NA	NA	0.00360656	0.281902	0.00445902	NA	NA	NA	87998	3852	155544	171315	92790
chr3	33744598	33759848	ENST00000359576	-	ENSG00000163539	CLASP2	protein_coding	1525	0.39882	6.55738e-05	0.00308197	0.0052459	0.0037377	0.0429508	0.0102295	0.00596721	NA	0.0257705	0.436787	0.00334426	0.0323934	NA	NA	NA	NA	NA	NA	0.00859016	0.188787	NA	NA	NA	NA	237951	3108459	291091	80217	222107
chr3	39093489	39108739	ENST00000302313	+	ENSG00000114742	WDR48	protein_coding	1525	0.401705	0.000393443	0.00321311	0.00668852	0.00596721	0.0413115	0.00144262	0.0067541	NA	0.0144262	0.323869	0.00498361	0.00878689	NA	NA	NA	NA	NA	NA	0.00163934	0.14177	NA	NA	NA	NA	15662	525693	4601	914756	44390
chr3	61547243	61562493	ENST00000495879	+	ENSG00000144724	PTPRG	protein_coding	1525	0.464393	6.55738e-05	0.0015082	0.0052459	0.0108197	0.0218361	0.0144918	0.0042623	0.00118033	0.00714754	0.00740984	0.0042623	0.0285902	NA	NA	NA	NA	NA	NA	0.0015082	0.15023	NA	NA	NA	NA	718152	3059156	521915	3024314	209826
chr4	119258908	119274158	ENST00000296498	-	ENSG00000164099	PRSS12	protein_coding	1525	0.40118	0.000131148	0.00157377	0.00432787	0.00340984	0.0375082	0.0148197	0.00859016	0.000590164	0.0340328	0.00531148	0.00786885	0.0556066	NA	NA	NA	NA	NA	NA	0.00714754	0.152	NA	NA	NA	NA	4333280	369819	33180	332415	72965
chr4	178230990	178246240	ENST00000264596	+	ENSG00000109674	NEIL3	protein_coding	1525	0.378623	0.000131148	0.00308197	0.00577049	0.00222951	0.0361311	0.00163934	0.00288525	NA	0.0320656	0.100918	NA	0.0142295	NA	NA	NA	NA	NA	NA	0.00288525	0.0965902	NA	NA	NA	NA	4974146	977594	80938	517095	53107
chr4	54915607	54930857	ENST00000263921	-	ENSG00000109220	CHIC2	protein_coding	1525	0.366623	0.000131148	0.00636066	0.00177049	0.00203279	0.0432131	0.0158689	0.00596721	NA	0.0813115	0.142361	0.0104918	0.00485246	NA	NA	NA	NA	NA	NA	0.00701639	0.0917377	NA	NA	NA	NA	37408	1367802	564754	164406	54901
chr4	57961301	57976551	ENST00000295666	-	ENSG00000163453	IGFBP7	protein_coding	1525	0.431607	0.000196721	0.00360656	0.00177049	NA	0.0219016	0.0104918	0.00472131	0.000918033	0.0487869	0.106361	0.00170492	NA	NA	NA	NA	NA	NA	NA	0.0015082	0.169115	0.00695082	NA	NA	NA	92725	10361437	39217	10590444	79612
chr4	88928820	88944070	ENST00000237596	+	ENSG00000118762	PKD2	protein_coding	1525	0.421115	0.000131148	0.00163934	0.00432787	0.00170492	0.0476066	0.00557377	0.00767213	NA	0.0420984	0.145639	0.008	0.00419672	NA	NA	NA	NA	NA	NA	0.00459016	0.195213	NA	NA	NA	NA	331070	113653	212711	616365	70109
chr5	10746134	10761384	ENST00000230895	-	ENSG00000112977	DAP	protein_coding	1525	0.472656	0.000131148	NA	0.00629508	0.00367213	0.0277377	0.00413115	0.00740984	0.000721311	0.0257049	0.0992787	0.00740984	0.0747541	NA	NA	NA	NA	NA	NA	0.00478689	0.139541	NA	NA	NA	NA	413216	3943524	63456	3382444	82042
chr5	137353525	137368775	ENST00000425075	-	ENSG00000031003	FAM13B	protein_coding	1525	0.416328	0.000393443	0.0064918	0.00209836	NA	0.0240656	NA	0.0104262	0.0012459	0.0123279	0.0512787	0.0015082	0.0507541	NA	NA	NA	NA	NA	NA	0.0077377	0.310098	NA	NA	NA	NA	238736	106683	1810353	145641	92914
chr5	179483868	179499118	ENST00000521389	-	ENSG00000113269	RNF130	protein_coding	1525	0.447803	6.55738e-05	0.00321311	NA	0.00629508	0.0402623	0.0141639	0.00452459	0.000786885	0.020918	0.185639	0.0135082	0.162492	NA	NA	NA	NA	NA	NA	NA	0.13777	NA	NA	NA	NA	16721	161476	194041	422298	117051
chr5	59980767	59996017	ENST00000512452	-	ENSG00000035499	DEPDC1B	protein_coding	1525	0.38518	0.000262295	0.00157377	0.00209836	NA	0.032	0.00242623	0.00622951	NA	0.00780328	0.184459	NA	0.0447869	NA	NA	NA	NA	NA	NA	0.00216393	0.135607	NA	NA	NA	NA	2200051	173641	3395511	244938	52792
chr5	60628100	60643350	ENST00000252744	+	ENSG00000130449	ZSWIM6	protein_coding	1525	0.420721	0.000131148	0.00314754	NA	0.00419672	0.0306885	0.00852459	0.00629508	NA	0.0381639	0.0446557	0.0113443	0.0042623	NA	NA	NA	NA	NA	NA	0.0158033	0.146295	NA	NA	NA	NA	933888	179236	1016250	169798	213897
chr5	64049262	64064512	ENST00000513458	-	ENSG00000153006	SREK1IP1	protein_coding	1525	0.380787	0.000262295	0.00491803	0.00878689	0.0037377	0.0253115	0.0150164	0.00754098	NA	0.0698361	0.20918	0.00852459	0.0424918	NA	NA	NA	NA	NA	NA	0.0024918	0.159672	NA	NA	NA	NA	2324784	380050	2100096	242	48174
chr5	65003612	65018862	ENST00000506816	-	ENSG00000197860	SGTB	protein_coding	1525	0.419541	0.000393443	0.0055082	0.00183607	0.00118033	0.0299672	0.0145574	0.00577049	NA	0.012918	0.178754	0.0123279	NA	NA	NA	NA	NA	NA	NA	0.00177049	0.239869	NA	NA	NA	NA	58675	3628690	16908	203521	42347
chr6	106758416	106773666	ENST00000369070	-	ENSG00000057663	ATG5	protein_coding	1525	0.385902	0.000196721	0.00321311	0.00465574	0.00163934	0.0253115	0.027082	0.0092459	NA	0.0215738	0.278361	0.00183607	NA	NA	NA	NA	NA	NA	NA	0.00236066	0.148131	NA	NA	NA	NA	882667	245236	175852	186063	141315
chr6	110485957	110501207	ENST00000392588	-	ENSG00000112290	WASF1	protein_coding	1525	0.367607	0.000196721	0.00163934	0.00393443	0.00308197	0.0310164	0.0309508	0.00393443	NA	0.0536393	0.206492	NA	NA	NA	NA	NA	NA	NA	NA	NA	0.0641311	NA	NA	NA	NA	656767	429973	314573	416	80185
chr6	128826620	128841870	ENST00000368227	-	ENSG00000152894	PTPRK	protein_coding	1525	0.397508	0.000196721	0.00459016	0.00196721	0.00708197	0.0281311	0.0146885	0.00459016	NA	0.0556721	0.0100984	0.00419672	NA	NA	NA	NA	NA	NA	NA	0.0113443	0.108852	NA	NA	NA	NA	961370	1056369	1192165	362415	551945
chr6	144314291	144329541	ENST00000392307	-	ENSG00000118495	PLAGL1	protein_coding	1525	0.367148	6.55738e-05	0.00340984	0.00340984	0.00190164	0.0365246	0.0165902	0.008	NA	0.036	0.23377	0.00393443	0.0601967	NA	NA	NA	NA	NA	NA	0.00944262	0.0859016	NA	NA	NA	NA	456521	86476	104598	283331	68102
chr6	144606837	144622087	ENST00000433557	+	ENSG00000152818	UTRN	protein_coding	1525	0.401377	0.000131148	0.00236066	0.00577049	0.00131148	0.0385574	0.0107541	0.00531148	NA	0.0369836	0.151541	0.00845902	NA	NA	NA	NA	NA	NA	NA	0.00832787	0.104328	NA	NA	NA	NA	2217990	421894	1299602	190083	117483
chr6	155054459	155069709	ENST00000367178	+	ENSG00000213079	SCAF8	protein_coding	1525	0.407213	0.000131148	0.00163934	0.00144262	0.00878689	0.0300328	0.0067541	0.0108197	NA	0.0179672	0.134689	0.00937705	NA	NA	NA	NA	NA	NA	NA	0.00262295	0.261967	NA	NA	NA	NA	316963	3263227	482804	222706	100733
chr6	160390131	160405381	ENST00000356956	+	ENSG00000197081	IGF2R	protein_coding	1525	0.464918	6.55738e-05	NA	0.0160656	0.00472131	0.026623	0.0027541	0.00406557	0.00118033	0.0375082	0.103738	0.00727869	0.0489836	NA	NA	NA	NA	NA	NA	0.0189508	0.0776393	NA	NA	NA	NA	83982	170670	1120925	179396	137452
chr6	64345725	64360975	ENST00000506783	+	ENSG00000118482	PHF3	protein_coding	1525	0.358623	0.000196721	0.00642623	0.00229508	NA	0.0373115	0.0113443	0.00931148	0.000590164	0.140393	0.0494426	0.00944262	NA	NA	NA	NA	NA	NA	NA	0.00937705	0.0984918	NA	NA	NA	NA	6737381	52236	5999915	7258647	73385
chr7	158607069	158622319	ENST00000251527	-	ENSG00000117868	ESYT2	protein_coding	1525	0.445836	0.000131148	0.0015082	0.0106885	0.00163934	0.031082	0.0077377	0.00485246	NA	0.00754098	0.0507541	0.00537705	0.0716721	NA	NA	NA	NA	NA	NA	NA	0.17718	NA	NA	NA	NA	NA	NA	NA	NA	98633
chr7	35062403	35077653	ENST00000310974	-	ENSG00000173852	DPY19L1	protein_coding	1525	0.434426	6.55738e-05	0.00544262	NA	0.00511475	0.0363934	0.00832787	0.00347541	NA	0.080918	0.0696393	0.0172459	0.0411803	NA	NA	NA	NA	NA	NA	0.00498361	0.107279	NA	NA	NA	NA	1888651	594616	843541	762942	109165
chr7	82057864	82073114	ENST00000356860	-	ENSG00000153956	CACNA2D1	protein_coding	1525	0.378295	6.55738e-05	0.00465574	NA	0.00177049	0.0540984	0.00747541	0.00563934	NA	NA	0.0637377	0.0101639	NA	NA	NA	NA	NA	NA	NA	0.00609836	0.123869	NA	NA	NA	NA	1484447	1514544	2184389	4708562	497354
chr7	86781677	86796927	ENST00000331242	+	ENSG00000135164	DMTF1	protein_coding	1525	0.361902	0.000590164	0.00183607	0.00281967	0.00485246	0.0462295	0.00459016	0.00504918	NA	0.0268852	0.0640656	0.0055082	NA	NA	NA	NA	NA	NA	NA	NA	0.079541	NA	NA	NA	NA	153273	6932952	3800	2030430	43971
chr7	96323923	96339173	ENST00000417009	-	ENSG00000127922	SHFM1	protein_coding	1525	0.367475	0.000262295	0.00157377	0.00668852	0.00701639	0.0472131	0.0102951	0.00498361	NA	0.044459	0.159082	0.00131148	0.0219672	NA	NA	NA	NA	NA	NA	0.0027541	0.107738	NA	NA	NA	NA	347714	1142255	2112845	406731	87299
chr7	98923521	98938771	ENST00000432884	+	ENSG00000241685	ARPC1A	protein_coding	1525	0.439541	0.000327869	0.00459016	NA	0.0015082	0.0354098	0.00740984	0.00904918	NA	0.0539016	0.133639	0.00137705	NA	NA	NA	NA	NA	NA	NA	0.00170492	0.432918	NA	NA	NA	NA	8776	312655	28776	181778	62266
chr7	99156291	99171541	ENST00000486324	+	ENSG00000197343	ZNF655	protein_coding	1525	0.430951	0.000459016	0.00157377	0.00131148	0.00609836	0.0311475	NA	0.00904918	NA	0.00806557	0.0228852	0.00334426	NA	NA	NA	NA	NA	NA	NA	0.00819672	0.250689	NA	NA	NA	NA	18279	24846	277393	6534	44132
chr8	30241944	30257194	ENST00000538486	+	ENSG00000157110	RBPMS	protein_coding	1525	0.419803	0.000459016	0.00157377	0.0148197	0.0109508	0.0205902	0.00498361	0.00511475	NA	NA	0.0298361	0.0095082	0.034623	NA	NA	NA	NA	NA	NA	0.00859016	0.0735738	NA	NA	NA	NA	319745	200789	154086	301295	187790
chr8	30500518	30515768	ENST00000355904	-	ENSG00000197265	GTF2E2	protein_coding	1525	0.401574	0.000459016	0.00642623	0.0024918	NA	0.0371148	0.00196721	0.0127213	0.000655738	0.0221639	0.275475	NA	0.0268197	NA	NA	NA	NA	NA	NA	0.00439344	0.247934	0.00754098	NA	NA	NA	535119	19811	46034	85921	79933
chr8	30891317	30906567	ENST00000298139	+	ENSG00000165392	WRN	protein_coding	1525	0.38282	6.55738e-05	0.00478689	0.00708197	NA	0.0125246	0.0203934	0.00491803	NA	0.0344262	0.469049	NA	0.0683279	NA	NA	NA	NA	NA	NA	0.00865574	0.0818361	NA	NA	NA	NA	565950	266797	2297026	220965	139968
chr8	56685701	56700951	ENST00000260129	+	ENSG00000137574	TGS1	protein_coding	1525	0.41259	0.000327869	0.00314754	0.00268852	0.00183607	0.0325246	0.00839344	0.00622951	NA	0.0169836	0.135148	0.00459016	0.0922623	NA	NA	NA	NA	NA	NA	NA	0.239738	NA	NA	NA	NA	66684	1624627	255037	1671124	52304
chr8	81397902	81413152	ENST00000430430	+	ENSG00000205189	ZBTB10	protein_coding	1525	0.425311	0.000196721	0.00616393	0.00137705	0.011082	0.027541	0.0137705	0.0102295	NA	0.0405902	0.0236066	0.0214426	NA	NA	NA	NA	NA	NA	NA	0.0224918	0.14118	NA	NA	NA	0.00668852	4581420	1765905	442143	455396	40598
chr9	111866975	111882225	ENST00000374586	-	ENSG00000106771	TMEM245	protein_coding	1525	0.408984	0.000196721	0.00393443	NA	0.00688525	0.0304262	0.00157377	0.00636066	NA	NA	0.130492	0.00531148	NA	NA	NA	NA	NA	NA	NA	0.00419672	0.236656	NA	NA	NA	NA	33647	1123866	138988	520842	104793
chr9	132815705	132830955	ENST00000347136	+	ENSG00000148358	GPR107	protein_coding	1525	0.465836	6.55738e-05	NA	NA	0.00295082	0.0274098	0.00262295	0.0137049	NA	0.0340984	0.0773115	0.00622951	0.028459	NA	NA	NA	NA	NA	NA	0.0118033	0.464656	NA	NA	NA	NA	79151	171598	597031	10232	86738
chr9	74510597	74525847	ENST00000377041	-	ENSG00000107362	FAM108B1	protein_coding	1525	0.396984	0.000131148	0.00157377	0.00131148	0.00268852	0.0334426	0.00708197	0.00459016	NA	0.0466885	0.132787	NA	NA	NA	NA	NA	NA	NA	0.00498361	0.00472131	0.234885	NA	NA	NA	NA	102047	440493	1516058	575	48479
chr9	82186688	82201938	ENST00000376552	+	ENSG00000106829	TLE4	protein_coding	1525	0.404852	0.000655738	0.00157377	0.004	0.00780328	0.0508852	0.00144262	0.00878689	0.000590164	NA	0.0256393	0.011082	NA	NA	NA	NA	NA	NA	NA	0.0102951	0.0504918	NA	NA	NA	NA	4011344	1241679	3631216	1540469	153726
chrX	109546217	109561467	ENST00000262844	-	ENSG00000101935	AMMECR1	protein_coding	1525	0.398885	0.000262295	NA	0.00131148	0.00157377	0.0390164	0.00465574	0.00721311	NA	0.0401967	0.0318689	0.00367213	NA	NA	NA	NA	NA	NA	NA	NA	0.0952787	NA	NA	NA	NA	53179	4783715	100451	1362878	124053
chrX	133507283	133522533	ENST00000370803	+	ENSG00000156531	PHF6	protein_coding	1525	0.384787	0.000196721	NA	0.00177049	0.00498361	0.0322623	0.00970492	0.00760656	0.000721311	0.00898361	0.0120656	NA	NA	NA	NA	NA	NA	NA	NA	NA	0.192721	NA	NA	NA	NA	46891	3875862	130123	2155094	55537
chrX	153347962	153363212	ENST00000303391	-	ENSG00000169057	MECP2	protein_coding	1525	0.458098	0.000262295	NA	0.00603279	0.00334426	0.0300328	0.0264262	0.00636066	0.00216393	0.011541	0.085377	0.00786885	NA	NA	NA	NA	NA	NA	NA	0.00321311	0.248918	NA	NA	NA	NA	37870	213687	74566	244384	76188
chrX	41767466	41782716	ENST00000378154	-	ENSG00000147044	CASK	protein_coding	1525	0.392852	0.000131148	0.00170492	0.00183607	0.00583607	0.0343607	0.0236066	0.00301639	NA	0.0695738	0.0356721	0.0064918	NA	NA	NA	NA	NA	NA	NA	0.0107541	0.147738	0.00577049	NA	NA	NA	1147912	2600168	533192	2949706	363966
chrX	70752933	70768183	ENST00000373719	+	ENSG00000147162	OGT	protein_coding	1525	0.404721	0.000393443	0.00452459	0.00734426	0.00295082	0.0312787	0.0015082	0.00813115	0.000786885	0.0434754	0.00340984	0.00990164	NA	NA	NA	NA	NA	NA	NA	0.0037377	0.100984	NA	NA	NA	NA	4940	67078	554027	277886	42814
chrY	16634518	16649768	ENST00000471252	+	ENSG00000165246	NLGN4Y	protein_coding	1525	0.404328	0.000196721	0.00314754	0.00485246	0.00596721	0.0193443	0.00439344	0.00380328	0.000590164	0.00419672	0.0172459	0.0117377	0.0209836	NA	NA	NA	NA	NA	NA	0.0207869	0.0695738	NA	NA	NA	NA	5054725	816616	4359868	2101129	99859
chr10	112679301	112694301	ENST00000265277	+	ENSG00000108061	SHOC2	protein_coding	1500	0.358	0.000133333	0.00473333	0.00646667	NA	0.0236	0.0105333	0.00373333	NA	0.0178	0.0896667	0.0251333	0.0240667	NA	NA	NA	NA	NA	NA	0.00473333	0.0896667	NA	NA	NA	NA	1487454	19537	1190320	177	94121
chr10	115614420	115629420	ENST00000369301	+	ENSG00000196865	NHLRC2	protein_coding	1500	0.370133	0.000133333	0.0016	0.0074	0.0014	0.0344	0.0294667	0.00453333	NA	0.0262667	0.234133	0.00786667	0.0348667	NA	NA	NA	NA	NA	NA	0.00426667	0.1258	NA	NA	NA	NA	927082	123756	227553	561	62533
chr10	116581503	116596503	ENST00000369248	+	ENSG00000151553	FAM160B1	protein_coding	1500	0.392267	0.000333333	NA	0.0064	0.0016	0.0428	0.0192667	0.00633333	0.0006	0.0341333	0.0476667	0.0133333	NA	NA	NA	NA	NA	NA	NA	NA	0.1656	NA	NA	NA	NA	76448	909238	1809199	137089	42969
chr10	122610695	122625695	ENST00000263461	+	ENSG00000120008	WDR11	protein_coding	1500	0.364467	0.000533333	0.00333333	0.00153333	NA	0.0582667	0.0188	0.00446667	NA	0.0755333	0.189133	NA	NA	NA	NA	NA	NA	NA	NA	0.0163333	0.104	NA	NA	NA	NA	1097993	261328	851929	978301	58341
chr10	180405	195405	ENST00000439456	+	ENSG00000015171	ZMYND11	protein_coding	1500	0.4282	0.0002	0.00153333	NA	0.0062	0.0258667	0.00546667	0.00453333	0.00193333	0.00293333	0.1608	0.0212	0.0243333	NA	NA	NA	NA	NA	NA	0.0183333	0.1398	NA	NA	NA	NA	NA	NA	NA	NA	103186
chr10	44865497	44880497	ENST00000395795	-	ENSG00000107562	CXCL12	protein_coding	1500	0.5106	0.000466667	NA	0.00593333	0.0044	0.03	0.00613333	0.00453333	NA	NA	NA	NA	NA	NA	NA	NA	NA	NA	NA	0.00493333	NA	NA	NA	NA	NA	696171	591211	727145	615775	87459
chr11	107313572	107328572	ENST00000433523	-	ENSG00000152404	CWF19L2	protein_coding	1500	0.372667	0.000266667	0.01	0.0014	NA	0.0235333	0.0276667	0.0100667	NA	NA	0.314	0.015	0.0396	NA	NA	NA	NA	NA	NA	0.0082	0.101733	NA	NA	NA	NA	1340107	44880	1319153	550835	112382
chr11	12398732	12413732	ENST00000334956	+	ENSG00000197702	PARVA	protein_coding	1500	0.450067	6.66667e-05	NA	0.00173333	0.00493333	0.0264	0.00786667	0.00633333	0.0014	0.0906667	0.1558	0.00793333	0.0692	NA	NA	NA	NA	NA	NA	0.00513333	0.0418	NA	NA	NA	NA	257236	18041	970823	367815	153616
chr1	115285648	115300648	ENST00000530886	-	ENSG00000009307	CSDE1	protein_coding	1500	0.389667	0.000333333	NA	0.0034	0.0018	0.0289333	0.0188667	0.00473333	0.0002	0.0261333	0.0512667	NA	NA	NA	NA	NA	NA	NA	NA	NA	0.133467	NA	NA	NA	NA	1133	11456	735773	883925	40722
chr11	18328721	18343721	ENST00000396253	-	ENSG00000110756	HPS5	protein_coding	1500	0.404	0.000466667	0.00346667	0.00386667	NA	0.0290667	0.0123333	0.0108	0.0006	0.0116	0.0838667	NA	0.104867	NA	NA	NA	NA	NA	NA	0.00493333	0.2436	NA	NA	NA	NA	176083	158136	904853	94	43498
chr11	33278218	33293218	ENST00000525975	+	ENSG00000110422	HIPK3	protein_coding	1500	0.415667	0.0002	0.0038	0.00533333	0.00753333	0.0499333	0.0143333	0.00986667	0.0006	NA	0.0542	0.0126	NA	NA	NA	NA	0.00393333	NA	NA	0.00886667	0.240333	NA	NA	NA	NA	245658	177218	401435	95181	96896
chr1	197729826	197744826	ENST00000477581	-	ENSG00000213047	DENND1B	protein_coding	1500	0.374467	0.000266667	0.0018	0.0018	0.0052	0.0202	0.0141333	0.00453333	0.000733333	NA	0.0159333	0.00673333	NA	NA	NA	NA	NA	NA	NA	0.0338667	0.131267	NA	NA	NA	NA	535154	1032305	4480884	126855	40038
chr1	205165727	205180727	ENST00000367160	-	ENSG00000133059	DSTYK	protein_coding	1500	0.445333	0.000133333	NA	0.00186667	0.00613333	0.0256	0.0260667	0.0119333	0.0006	0.00866667	0.0808667	0.0114667	NA	NA	NA	NA	NA	NA	NA	0.0116	0.329733	NA	NA	NA	NA	49577	90463	148777	1335472	69095
chr12	101111304	101126304	ENST00000549155	+	ENSG00000151572	ANO4	protein_coding	1500	0.394933	6.66667e-05	0.00693333	0.0034	0.0082	0.0236667	0.0155333	0.00473333	0.0006	0.0107333	0.270867	0.0016	0.0252	NA	NA	NA	NA	NA	NA	NA	0.1246	NA	NA	NA	NA	37069	92619	635598	574662	302598
chr12	111843752	111858752	ENST00000341259	+	ENSG00000111252	SH2B3	protein_coding	1500	0.554733	0.000133333	NA	0.00386667	0.0135333	0.0215333	0.00226667	0.00793333	0.00126667	NA	0.122333	0.00666667	NA	NA	NA	NA	NA	NA	NA	0.00266667	0.292467	NA	NA	NA	NA	240104	756817	6265	36827	45675
chr12	112856713	112871713	ENST00000392597	+	ENSG00000179295	PTPN11	protein_coding	1500	0.4426	6.66667e-05	0.00186667	0.0046	0.0032	0.0214667	0.00386667	0.00953333	NA	0.0240667	0.1154	0.0062	NA	NA	NA	NA	NA	NA	NA	0.0230667	0.386467	NA	NA	NA	NA	479535	265305	698264	9270	68014
chr1	224301789	224316789	ENST00000366862	+	ENSG00000143756	FBXO28	protein_coding	1500	0.4056	6.66667e-05	0.0048	0.00206667	NA	0.0382667	0.0106667	0.00933333	NA	0.0206667	0.016	0.0018	NA	NA	NA	NA	NA	NA	NA	0.0112667	0.306333	NA	NA	NA	NA	29138	338069	73246	268115	47960
chr13	27731033	27746033	ENST00000282344	-	ENSG00000152484	USP12	protein_coding	1500	0.395133	0.0002	0.005	0.00146667	0.0128667	0.0294667	0.0074	0.00553333	0.0006	0.0211333	0.0228	0.0339333	0.0288667	NA	NA	NA	NA	NA	NA	NA	0.0616	NA	NA	NA	NA	909525	263742	442951	79658	105740
chr13	30866621	30881621	ENST00000380615	-	ENSG00000102781	KATNAL1	protein_coding	1500	0.3966	0.0002	0.00306667	NA	0.00426667	0.0419333	0.00946667	0.00713333	0.0006	0.159733	0.222467	0.00646667	0.00913333	NA	0.00766667	NA	NA	NA	NA	0.0014	0.1412	NA	NA	NA	NA	416801	151257	1588528	310208	104854
chr13	45563755	45578755	ENST00000361121	+	ENSG00000133114	KIAA1704	protein_coding	1500	0.419067	0.000266667	0.00313333	0.0034	0.0052	0.016	0.00393333	0.0124667	NA	0.0623333	0.123133	0.00206667	0.0242	NA	NA	NA	NA	NA	NA	0.0104667	0.256333	NA	0.0211333	NA	NA	90875	409187	307548	142	43987
chr13	50352057	50367057	ENST00000261667	-	ENSG00000102753	KPNA3	protein_coding	1500	0.4226	6.66667e-05	0.0046	0.00666667	0.00106667	0.0482667	NA	0.0062	NA	0.0611333	0.112667	0.0084	0.0368667	NA	NA	NA	NA	NA	NA	0.00286667	0.183467	NA	NA	NA	NA	61434	119784	223940	204085	93610
chr13	99853028	99868028	ENST00000403766	+	ENSG00000134882	UBAC2	protein_coding	1500	0.462933	0.0002	0.00173333	0.003	0.0014	0.0242667	NA	0.00626667	NA	0.0166667	0.0739333	NA	0.044	NA	NA	0.0160667	NA	NA	NA	0.00166667	0.2064	NA	NA	NA	0.00813333	110645	751005	1289389	114368	184766
chr14	100705322	100720322	ENST00000262238	+	ENSG00000100811	YY1	protein_coding	1500	0.4794	0.000133333	NA	0.00533333	0.0107333	0.0198667	0.0014	0.0160667	0.0006	0.00626667	NA	0.0172667	0.0303333	NA	NA	NA	NA	NA	NA	0.0246	0.386133	NA	NA	NA	NA	97432	296927	12130	634595	43807
chr14	102276140	102291140	ENST00000350249	+	ENSG00000078304	PPP2R5C	protein_coding	1500	0.416467	0.000333333	0.00153333	0.0028	0.00173333	0.0280667	0.0046	0.00686667	NA	0.112867	0.0541333	0.00453333	NA	NA	NA	NA	NA	NA	NA	0.0129333	0.1234	NA	NA	NA	NA	114724	743002	230934	1433460	117716
chr14	64179757	64194757	ENST00000247225	-	ENSG00000126821	SGPP1	protein_coding	1500	0.4192	6.66667e-05	0.003	NA	NA	0.0172	0.00446667	0.00926667	NA	0.0781333	0.154533	0.017	NA	NA	NA	NA	NA	NA	NA	0.00733333	0.3856	NA	NA	NA	NA	46166	758797	1586330	124925	43825
chr14	99947761	99962761	ENST00000555049	+	ENSG00000090061	CCNK	protein_coding	1500	0.394467	0.000333333	0.00173333	0.00366667	0.0016	0.0238	0.0128667	0.0066	NA	0.0178667	0.256933	0.00406667	0.0218667	NA	NA	NA	NA	NA	NA	NA	0.0919333	NA	NA	NA	NA	123718	2599810	769691	535	53620
chr15	38544527	38559527	ENST00000299084	+	ENSG00000166068	SPRED1	protein_coding	1500	0.3772	6.66667e-05	0.00646667	0.002	0.00273333	0.0464667	0.00593333	0.00566667	0.000666667	0.0446	0.0752667	0.00473333	0.0265333	NA	NA	NA	NA	NA	NA	0.00273333	0.0831333	NA	NA	NA	NA	161800	1442078	1508403	1151027	104923
chr15	72395918	72410918	ENST00000564931	-	ENSG00000066933	MYO9A	protein_coding	1500	0.4136	0.0004	NA	0.00426667	0.0082	0.0291333	0.00966667	0.0108	0.0006	0.0264667	0.2284	0.0129333	0.01	NA	NA	NA	NA	NA	NA	0.00753333	0.262	NA	NA	NA	NA	1186146	80451	295196	355748	72233
chr15	89630690	89645690	ENST00000569411	+	ENSG00000140526	ABHD2	protein_coding	1500	0.448533	0.000466667	0.00313333	0.00326667	0.0066	0.0436	0.0103333	0.00393333	0.000666667	0.0128	0.059	0.007	NA	NA	NA	NA	NA	NA	NA	0.00186667	0.2012	NA	NA	NA	NA	116503	431811	188845	174027	67931
chr16	69598997	69613997	ENST00000426654	+	ENSG00000102908	NFAT5	protein_coding	1500	0.403333	0.0002	0.0048	0.00473333	0.0026	0.0501333	0.0209333	0.00706667	NA	0.0162667	0.0283333	0.0206667	NA	NA	NA	NA	NA	NA	NA	0.00833333	0.2854	NA	NA	NA	NA	157276	98830	104306	179123	139556
chr16	88908374	88923374	ENST00000268695	-	ENSG00000141012	GALNS	protein_coding	1500	0.569267	0.0004	NA	0.00213333	0.0148667	0.0311333	0.0170667	0.00426667	0.00173333	0.0438667	0.1682	NA	0.0554	NA	NA	NA	NA	NA	NA	0.00586667	0.205067	NA	NA	NA	NA	5032	410660	7708	131	43232
chr17	61699775	61714775	ENST00000579585	+	ENSG00000198909	MAP3K3	protein_coding	1500	0.434867	0.000266667	0.0016	0.00333333	NA	0.0318	0.00473333	0.00946667	0.0018	0.0121333	0.016	0.0217333	NA	NA	NA	NA	0.00366667	NA	NA	0.00186667	0.200333	NA	NA	NA	NA	111791	14050	33473	176053	72674
chr17	76906472	76921472	ENST00000262768	-	ENSG00000035862	TIMP2	protein_coding	1500	0.5448	0.000133333	NA	0.00153333	0.0088	0.0315333	0.0086	0.007	0.0016	0.0205333	0.0532	0.0098	0.0297333	NA	NA	NA	NA	NA	NA	0.0052	0.2766	NA	NA	NA	NA	44503	45862	460833	98778	72409
chr18	2571510	2586510	ENST00000261597	+	ENSG00000080986	NDC80	protein_coding	1500	0.370533	0.0006	0.00173333	0.00366667	NA	0.0566	0.0114667	0.00546667	NA	0.0528667	0.106533	0.00326667	0.0147333	NA	NA	NA	NA	NA	NA	0.0102667	0.200867	NA	NA	NA	NA	44375	1898011	40658	21	45124
chr18	59854507	59869507	ENST00000398130	+	ENSG00000134444	KIAA1468	protein_coding	1500	0.378267	6.66667e-05	0.00166667	NA	NA	0.0320667	0.0206	0.00453333	NA	0.0153333	0.266267	0.006	NA	NA	NA	NA	NA	NA	NA	0.00446667	0.131467	NA	NA	NA	NA	296150	2282969	896071	218	119848
chr1	89149905	89164905	ENST00000316005	+	ENSG00000065243	PKN2	protein_coding	1500	0.3626	0.0002	0.00206667	NA	0.00386667	0.0262	0.018	0.00593333	NA	0.0354667	0.194733	0.00806667	0.0173333	NA	NA	NA	NA	NA	NA	0.0066	0.102467	NA	NA	NA	NA	908738	1335298	128415	1769798	122046
chr18	9708162	9723162	ENST00000578921	+	ENSG00000168461	RAB31	protein_coding	1500	0.483733	0.000133333	NA	0.0072	0.00813333	0.0372667	0.00726667	0.0102	NA	0.0223333	0.110733	0.0096	0.0463333	NA	NA	NA	NA	NA	NA	0.0048	0.205333	NA	NA	NA	NA	165792	170056	2135309	93562	154386
chr19	18617937	18632937	ENST00000262809	-	ENSG00000105656	ELL	protein_coding	1500	0.5436	6.66667e-05	NA	NA	0.00573333	0.0382	NA	0.0102	NA	0.0137333	0.0438667	0.00346667	NA	NA	NA	NA	NA	NA	NA	0.0058	0.322467	NA	NA	NA	NA	43826	9630	47565	35634	79462
chr1	97187221	97202221	ENST00000482253	+	ENSG00000117569	PTBP2	protein_coding	1500	0.387	0.0002	0.00473333	0.00526667	0.00326667	0.0337333	0.0052	0.00753333	0.0006	0.0258667	0.270467	0.00766667	0.0182	NA	NA	NA	NA	NA	NA	0.0018	0.2086	NA	NA	NA	NA	1900014	1474440	316078	1648714	92046
chr20	23387125	23402125	ENST00000377026	-	ENSG00000125814	NAPB	protein_coding	1500	0.403467	6.66667e-05	0.00306667	0.00206667	0.00726667	0.0304	0.0112	0.00546667	NA	NA	0.227133	0.00773333	0.004	NA	NA	NA	NA	NA	NA	NA	0.148733	NA	NA	NA	NA	2668859	212168	8442	1774213	46966
chr20	35477089	35492089	ENST00000237536	-	ENSG00000149639	SOGA1	protein_coding	1500	0.550533	0.000133333	NA	0.0064	0.0120667	0.021	0.0174	0.0072	0.00193333	0.0217333	0.0974667	0.00566667	NA	NA	NA	NA	NA	NA	NA	0.0212	0.197667	NA	NA	NA	NA	49859	28137	211129	315366	86244
chr20	39657458	39672458	ENST00000361337	+	ENSG00000198900	TOP1	protein_coding	1500	0.414133	0.000133333	NA	0.00126667	0.00746667	0.0172	0.0185333	0.0068	NA	0.0526	0.0151333	0.0119333	NA	NA	NA	NA	NA	NA	NA	0.00266667	0.163533	NA	NA	NA	NA	68702	1989092	109630	2593440	95669
chr20	9049410	9064410	ENST00000407043	+	ENSG00000101333	PLCB4	protein_coding	1500	0.402467	0.000133333	0.00466667	NA	0.00386667	0.0272667	NA	0.00426667	0.0006	0.0280667	0.0567333	0.00693333	0.0236	NA	NA	NA	NA	NA	NA	0.0112	0.117733	NA	NA	NA	NA	1326540	183863	1296422	1049017	270244
chr2	102313312	102328312	ENST00000427603	+	ENSG00000071054	MAP4K4	protein_coding	1500	0.442533	0.0002	0.00166667	0.0032	0.0018	0.0456667	NA	0.00653333	NA	0.0102	0.104867	0.0277333	0.0152	NA	NA	NA	NA	NA	NA	0.00693333	0.1862	NA	NA	NA	NA	417089	426534	980353	222147	127203
chr21	16422321	16437321	ENST00000400202	-	ENSG00000180530	NRIP1	protein_coding	1500	0.3844	0.000133333	0.005	NA	0.0052	0.0449333	0.00773333	0.00593333	NA	0.0122	0.0139333	0.0142	0.0322667	NA	NA	NA	NA	NA	NA	0.0038	0.0330667	NA	NA	NA	NA	641812	2528646	6571058	665174	103765
chr2	128770694	128785694	ENST00000259234	-	ENSG00000136715	SAP130	protein_coding	1500	0.444667	0.000466667	0.0038	NA	0.0151333	0.0329333	0.0104667	0.0126	NA	0.0812667	0.0791333	0.00706667	0.003	NA	NA	NA	NA	NA	0.00566667	0.0018	0.322667	NA	NA	NA	NA	102180	237359	284287	63059	86896
chr2	131836033	131851033	ENST00000389915	-	ENSG00000152102	FAM168B	protein_coding	1500	0.460533	0.000133333	0.0016	NA	0.00333333	0.0241333	0.00426667	0.0124	NA	0.0166	0.145667	0.00293333	0.0376	NA	NA	NA	NA	NA	NA	0.00293333	0.4384	NA	NA	NA	NA	711111	390499	678051	11386	41093
chr2	139259371	139274371	ENST00000280098	+	ENSG00000144228	SPOPL	protein_coding	1500	0.378733	6.66667e-05	NA	0.00173333	0.008	0.0406667	0.006	0.00386667	NA	0.0908	0.206667	0.0174	0.0276	NA	NA	NA	NA	NA	NA	0.00186667	0.123533	NA	NA	NA	NA	9303198	2716738	5404209	2516149	71746
chr2	158114110	158129110	ENST00000259056	+	ENSG00000136542	GALNT5	protein_coding	1500	0.406533	6.66667e-05	0.00313333	NA	NA	0.0272667	0.0086	0.00513333	0.001	0.0142	0.113267	NA	0.0200667	NA	NA	NA	NA	NA	NA	0.0152	0.1332	NA	NA	NA	NA	1159365	671195	438847	924823	56613
chr2	175098426	175113426	ENST00000284719	-	ENSG00000138430	OLA1	protein_coding	1500	0.419	0.000333333	0.00406667	0.00153333	0.00406667	0.0388667	0.0195333	0.007	0.0018	0.117867	0.1856	NA	0.0666667	NA	NA	NA	NA	NA	NA	NA	0.237733	NA	0.0211333	NA	NA	242996	99451	839708	147030	176251
chr2	176852514	176867514	ENST00000535310	-	ENSG00000144320	KIAA1715	protein_coding	1500	0.374	0.0004	NA	0.00133333	0.00206667	0.0396667	0.0129333	0.00353333	NA	0.00513333	0.00306667	0.00486667	0.0279333	NA	NA	NA	NA	NA	NA	0.002	0.213267	NA	NA	NA	NA	781024	132054	1533211	90017	72803
chr2	180856840	180871840	ENST00000404136	-	ENSG00000163510	CWC22	protein_coding	1500	0.380333	0.0002	0.00713333	0.00713333	0.00326667	0.0258	0.01	0.00393333	NA	0.044	0.240333	0.00186667	0.012	NA	NA	NA	NA	NA	NA	0.0042	0.115467	NA	NA	NA	NA	702490	2917764	1290831	973271	61492
chr2	188404219	188419219	ENST00000233156	-	ENSG00000003436	TFPI	protein_coding	1500	0.3414	0.000466667	0.008	NA	NA	0.0386667	0.0177333	0.00626667	NA	NA	0.0830667	0.0128	0.0319333	NA	NA	NA	NA	NA	NA	0.00266667	0.0996	NA	NA	NA	NA	4475990	1477421	750707	738170	90259
chr2	201921394	201936394	ENST00000485636	-	ENSG00000155744	FAM126B	protein_coding	1500	0.4094	0.000333333	NA	0.00166667	NA	0.0274667	NA	0.00973333	0.0006	0.0239333	0.0729333	0.00973333	0.118333	NA	NA	NA	NA	NA	NA	0.0207333	0.1814	NA	NA	NA	NA	67970	216752	127739	67	49125
chr22	19094967	19109967	ENST00000537045	-	ENSG00000070413	DGCR2	protein_coding	1500	0.483467	0.000133333	NA	0.00353333	0.0066	0.0194667	NA	0.00706667	0.000666667	0.0162667	0.1504	0.0104	NA	NA	NA	NA	NA	NA	NA	0.00366667	0.217133	NA	NA	NA	NA	34079	7824	409805	310068	86172
chr22	29999545	30014545	ENST00000413209	+	ENSG00000186575	NF2	protein_coding	1500	0.451667	0.000133333	0.0016	NA	0.00186667	0.0339333	0.0078	0.0104667	NA	0.0484667	0.277533	0.00353333	NA	NA	NA	NA	NA	NA	NA	0.00293333	0.433067	NA	NA	NA	NA	123812	290771	87399	22219	95038
chr22	41865129	41880129	ENST00000216254	+	ENSG00000100412	ACO2	protein_coding	1500	0.478133	6.66667e-05	0.0016	0.00466667	0.00326667	0.0175333	0.0116	0.0082	NA	NA	0.1102	0.00146667	NA	NA	NA	NA	NA	NA	NA	0.0016	0.429867	NA	NA	NA	NA	112165	69799	16673	421	59864
chr2	54683422	54698422	ENST00000356805	+	ENSG00000115306	SPTBN1	protein_coding	1500	0.4182	0.000133333	0.005	NA	0.00973333	0.0396	0.0148667	0.00506667	0.0006	0.0309333	0.0975333	0.0209333	NA	NA	NA	NA	NA	NA	NA	0.00526667	0.130133	NA	NA	NA	NA	32936	150987	475904	485445	213390
chr2	65644771	65659771	ENST00000440972	-	ENSG00000198369	SPRED2	protein_coding	1500	0.448533	0.000133333	0.0016	0.00166667	0.00586667	0.0184667	0.00706667	0.0042	0.0008	0.0336667	0.0614667	0.006	NA	NA	NA	NA	NA	NA	NA	0.00953333	0.1786	NA	NA	NA	NA	262336	2609560	121381	1002760	98008
chr2	9128942	9143942	ENST00000305997	-	ENSG00000143797	MBOAT2	protein_coding	1500	0.424733	6.66667e-05	0.00153333	0.00426667	0.0044	0.0196667	0.0074	0.004	0.0006	0.138733	0.051	0.0163333	0.0232	NA	NA	NA	NA	NA	NA	NA	0.0736	NA	NA	NA	NA	126187	401872	279359	202951	151122
chr2	98597388	98612388	ENST00000425805	-	ENSG00000075568	TMEM131	protein_coding	1500	0.377133	0.000133333	0.00493333	0.00153333	0.00433333	0.0262	0.00793333	0.00946667	0.0006	NA	0.261867	0.01	0.115733	NA	NA	NA	NA	NA	NA	0.00333333	0.0286	NA	NA	NA	NA	291827	603476	252859	448932	181576
chr3	130612812	130627812	ENST00000510168	+	ENSG00000017260	ATP2C1	protein_coding	1500	0.371533	0.0002	NA	0.00333333	0.00773333	0.0404667	0.0128667	0.00846667	NA	0.0429333	0.200667	0.0108	NA	NA	NA	NA	NA	NA	NA	0.00673333	0.0727333	NA	NA	NA	NA	92881	1373621	79908	147116	109139
chr3	171757418	171772418	ENST00000392699	+	ENSG00000075420	FNDC3B	protein_coding	1500	0.4238	0.0002	0.0048	0.00446667	0.008	0.0339333	0.0140667	0.00853333	0.0006	0.0414667	0.0578	0.0096	NA	NA	NA	NA	NA	NA	NA	0.00846667	0.183067	NA	NA	NA	NA	674879	1604939	551016	229134	94754
chr3	179154378	179169378	ENST00000232564	-	ENSG00000114450	GNB4	protein_coding	1500	0.406933	0.0002	NA	NA	0.00186667	0.0316	0.0102	0.007	NA	0.0509333	0.145067	0.00273333	0.0385333	NA	NA	NA	NA	NA	NA	0.00326667	0.1826	NA	NA	NA	NA	144540	136876	18370	111329	52388
chr3	191046866	191061866	ENST00000392455	+	ENSG00000152492	CCDC50	protein_coding	1500	0.381467	0.000266667	0.00166667	NA	0.0056	0.0336667	0.0265333	0.00513333	0.000666667	0.0469333	0.0606667	0.0066	NA	NA	NA	NA	NA	NA	NA	0.004	0.0744667	NA	NA	NA	NA	2224066	671880	1427738	1206640	69593
chr3	25691398	25706398	ENST00000424225	-	ENSG00000077097	TOP2B	protein_coding	1500	0.377267	0.000133333	0.00473333	0.0014	0.00153333	0.0264	0.0180667	0.00906667	NA	0.0803333	0.317467	0.00866667	NA	NA	NA	NA	NA	NA	NA	NA	0.1368	NA	NA	NA	NA	1707861	54036	1644289	125164	49434
chr3	87025257	87040257	ENST00000398399	-	ENSG00000206538	VGLL3	protein_coding	1500	0.371133	0.000133333	NA	0.00193333	NA	0.0416667	0.003	0.00473333	0.0006	0.0363333	0.0419333	0.0106	NA	NA	NA	NA	NA	NA	NA	0.0219333	0.0777333	NA	NA	NA	NA	5189307	1060842	11271803	236155	53138
chr3	88108424	88123424	ENST00000473136	+	ENSG00000229729	RP11-159G9.5	protein_coding	1500	0.371133	6.66667e-05	0.00326667	0.00846667	NA	0.0391333	0.0092	0.00866667	0.0006	0.0338	0.177	0.0048	0.0126667	NA	NA	NA	NA	NA	NA	0.00733333	0.1344	NA	NA	NA	NA	39837	803726	5628341	1068167	76224
chr4	39046659	39061659	ENST00000261425	+	ENSG00000109790	KLHL5	protein_coding	1500	0.392267	6.66667e-05	0.00173333	0.00193333	0.00653333	0.0322667	0.0124667	0.00473333	NA	0.0722667	0.120867	0.0132667	0.0598667	NA	NA	NA	NA	NA	NA	0.003	0.220667	NA	NA	NA	NA	97364	99294	202409	188221	77170
chr4	39352995	39367995	ENST00000381897	-	ENSG00000035928	RFC1	protein_coding	1500	0.406	0.0002	0.00333333	0.00473333	NA	0.0404667	0.0016	0.00726667	NA	0.0156	0.1552	0.00186667	NA	NA	NA	NA	NA	NA	NA	0.0116	0.323533	NA	NA	NA	NA	469557	87749	40565	92669	78919
chr4	81188096	81203096	ENST00000507780	+	ENSG00000138675	FGF5	protein_coding	1500	0.357	0.0002	0.00326667	0.0016	0.0022	0.0343333	0.0132667	0.0054	0.00166667	0.0098	0.0124667	0.0103333	NA	NA	NA	NA	NA	NA	NA	0.00646667	0.0456667	NA	NA	NA	NA	28777	62614	2046370	193619	69738
chr5	10564442	10579442	ENST00000504806	+	ENSG00000164236	ANKRD33B	protein_coding	1500	0.4924	6.66667e-05	0.00173333	NA	0.0133333	0.0283333	0.0116667	0.00993333	0.0014	0.0388	0.0699333	0.00873333	0.046	NA	NA	NA	NA	NA	NA	0.00693333	0.239067	NA	NA	NA	NA	3539386	99304	74899	256274	85294
chr5	153418528	153433528	ENST00000520327	+	ENSG00000037749	MFAP3	protein_coding	1500	0.383067	0.000266667	0.00353333	NA	0.00153333	0.0367333	NA	0.005	NA	0.0689333	0.136067	0.0074	0.0044	NA	NA	NA	NA	NA	NA	0.00266667	0.0660667	NA	NA	NA	NA	111766	2233613	310800	31	110979
chr5	71403061	71418061	ENST00000296755	+	ENSG00000131711	MAP1B	protein_coding	1500	0.432533	0.0002	0.0032	0.00406667	0.0108667	0.0405333	0.00653333	0.00513333	0.000666667	NA	0.0186	0.00393333	NA	NA	NA	NA	NA	NA	NA	0.00473333	0.0878667	NA	NA	NA	NA	22232	448531	72174	2737221	102334
chr6	132707684	132722684	ENST00000367963	-	ENSG00000079931	MOXD1	protein_coding	1500	0.396933	0.000133333	0.00313333	0.0036	0.00266667	0.022	0.0178667	0.00613333	0.0006	0.0161333	0.3498	0.00686667	0.0210667	NA	NA	NA	NA	NA	NA	0.0064	0.0797333	NA	NA	NA	0.00813333	410166	55978	466389	413023	105490
chr6	143999102	144014102	ENST00000440869	+	ENSG00000112419	PHACTR2	protein_coding	1500	0.387333	6.66667e-05	0.0084	NA	0.0028	0.0358	0.00226667	0.00706667	NA	0.0181333	0.3436	0.0108	0.0092	NA	NA	NA	NA	NA	NA	NA	0.0958667	NA	NA	NA	NA	125405	187351	222334	166082	146156
chr6	72114969	72129969	ENST00000436803	-	ENSG00000233237	LINC00472	lincRNA	1500	0.3768	0.000266667	0.0078	NA	0.00193333	0.0459333	0.00733333	0.007	NA	0.0314667	0.00653333	0.00786667	0.0231333	NA	NA	NA	NA	NA	NA	0.0016	0.0846667	NA	NA	NA	NA	3235	1803298	77996	1201601	75680
chr6	83777385	83792385	ENST00000237163	+	ENSG00000083097	DOPEY1	protein_coding	1500	0.374467	0.0002	0.00186667	0.0064	NA	0.0422	0.00586667	0.00206667	NA	0.0838667	0.25	0.0096	0.0302667	NA	NA	NA	NA	NA	NA	0.00206667	0.114667	NA	NA	NA	NA	85646	700252	57207	1840	100742
chr6	99380849	99395849	ENST00000229971	-	ENSG00000112234	FBXL4	protein_coding	1500	0.385267	0.000133333	0.00333333	0.00286667	0.00273333	0.029	0.0239333	0.0108667	0.000666667	0.212533	0.177133	0.005	0.0579333	NA	0.00686667	NA	NA	NA	NA	0.00206667	0.0870667	NA	NA	NA	NA	1624797	324943	2352698	573020	74248
chr7	135647101	135662101	ENST00000435723	-	ENSG00000105887	MTPN	protein_coding	1500	0.356733	6.66667e-05	0.00306667	0.00266667	0.0012	0.0274667	0.0198667	0.00946667	NA	0.0523333	0.0894667	0.00566667	0.00766667	NA	NA	NA	NA	NA	NA	0.00366667	0.107467	NA	NA	NA	NA	188507	1249990	260941	891297	47894
chr7	139044627	139059627	ENST00000545899	+	ENSG00000146963	LUC7L2	protein_coding	1500	0.385333	0.000266667	0.0032	0.00133333	0.00633333	0.0284	0.00846667	0.0058	NA	0.0962	0.0138	0.006	NA	NA	NA	NA	NA	NA	NA	0.00206667	0.0965333	NA	NA	NA	NA	792433	14086	161688	250162	63571
chr7	33087409	33102409	ENST00000242210	-	ENSG00000122643	NT5C3	protein_coding	1500	0.401933	6.66667e-05	0.00186667	0.00186667	NA	0.0368	0.00146667	0.00713333	0.0006	0.0745333	0.0212	NA	0.0198	NA	NA	NA	NA	NA	NA	0.0072	0.309133	NA	NA	NA	NA	79627	32000	15866	66742	48649
chr7	5806370	5821370	ENST00000389902	-	ENSG00000011275	RNF216	protein_coding	1500	0.460533	0.000333333	0.00153333	NA	0.0052	0.0293333	0.00506667	0.0164667	0.0006	NA	0.133667	0.0115333	0.0218	NA	NA	NA	NA	NA	NA	0.00306667	0.422533	NA	NA	NA	NA	211138	191499	135083	227511	159132
chr7	6144515	6159515	ENST00000306177	+	ENSG00000106346	USP42	protein_coding	1500	0.4386	0.000333333	0.00553333	0.0014	0.0094	0.0572	0.0058	0.0127333	0.0006	0.0126667	0.154667	0.0256667	0.0152667	NA	NA	NA	NA	NA	NA	0.0118667	0.337467	NA	NA	NA	0.00586667	229610	81050	16896	45655	56680
chr8	116666710	116681710	ENST00000519815	-	ENSG00000104447	TRPS1	protein_coding	1500	0.364667	0.000266667	0.0032	0.007	0.00986667	0.0392	0.0148	0.008	0.000733333	NA	NA	0.0334667	NA	NA	NA	NA	NA	NA	NA	0.00706667	0.00753333	NA	NA	NA	NA	6295360	975344	6064319	1097031	49709
chr8	131440906	131455906	ENST00000518721	-	ENSG00000153317	ASAP1	protein_coding	1500	0.483933	6.66667e-05	NA	0.0052	0.0068	0.0206667	0.00326667	0.0105333	0.0006	NA	0.223467	0.00413333	0.0895333	NA	NA	NA	NA	NA	NA	0.00753333	0.196267	NA	NA	NA	0.007	107127	2793507	2253472	1460449	390818
chr8	25316513	25331513	ENST00000330560	+	ENSG00000184661	CDCA2	protein_coding	1500	0.403933	0.000466667	NA	NA	NA	0.0202	0.0185333	0.00313333	0.000866667	0.0526	0.1208	0.00133333	NA	NA	NA	NA	NA	NA	NA	0.00273333	0.199933	NA	NA	NA	NA	792493	45894	1785890	529	48923
chr8	38311352	38326352	ENST00000341462	-	ENSG00000077782	FGFR1	protein_coding	1500	0.509267	0.0006	0.00153333	NA	0.00713333	0.0356	0.00733333	0.00353333	NA	0.0204	0.0246	0.00233333	NA	NA	NA	NA	NA	NA	NA	NA	0.277867	NA	NA	NA	NA	46562	131340	20290	259351	57695
chr8	89325254	89340254	ENST00000522726	-	ENSG00000156103	MMP16	protein_coding	1500	0.372467	0.000266667	0.0016	0.00133333	0.0016	0.0247333	0.0195333	0.00426667	NA	0.166	0.123533	0.0128667	0.0240667	NA	NA	NA	NA	NA	NA	0.0103333	0.0436	NA	NA	NA	NA	1779245	1605309	1726528	1429720	160102
chr8	97273943	97288943	ENST00000517309	+	ENSG00000156471	PTDSS1	protein_coding	1500	0.4146	0.000133333	NA	0.00333333	0.00806667	0.0252	0.003	0.00766667	0.0008	NA	0.0489333	0.0054	NA	NA	NA	NA	NA	NA	NA	0.0038	0.145933	NA	NA	NA	NA	191938	1105030	1739994	147	75280
chr9	2015342	2030342	ENST00000349721	+	ENSG00000080503	SMARCA2	protein_coding	1500	0.443333	0.000333333	0.00233333	0.00393333	0.0134667	0.0332667	0.0104667	0.00686667	0.0014	NA	0.007	0.00146667	0.0129333	NA	NA	NA	NA	NA	NA	NA	0.0509333	NA	NA	NA	NA	NA	NA	NA	NA	178282
chrX	40944888	40959888	ENST00000378308	+	ENSG00000124486	USP9X	protein_coding	1500	0.418733	6.66667e-05	0.0048	NA	0.00553333	0.0382667	0.0014	0.00473333	NA	0.1024	0.100133	0.0038	NA	NA	NA	NA	NA	NA	NA	NA	0.2454	NA	NA	NA	NA	207762	479000	389300	350084	146962
chrX	80457442	80472442	ENST00000373212	+	ENSG00000131171	SH3BGRL	protein_coding	1500	0.369267	0.0002	0.00486667	0.00666667	0.0014	0.0270667	0.0229333	0.0062	NA	NA	0.190667	NA	0.0296667	NA	NA	NA	NA	NA	NA	NA	0.124333	NA	NA	NA	NA	3761455	3075118	3075439	1	96604
chr10	104005289	104020039	ENST00000369983	+	ENSG00000107862	GBF1	protein_coding	1475	0.424	0.00020339	NA	0.00447458	0.00189831	0.0538983	NA	0.0080678	NA	0.0292881	0.0745763	NA	NA	NA	NA	NA	NA	NA	NA	0.00142373	0.352475	NA	NA	NA	NA	108939	81662	137712	125079	137367
chr10	11639003	11653753	ENST00000379237	-	ENSG00000148429	USP6NL	protein_coding	1475	0.387119	0.000135593	0.00657627	0.00420339	0.00413559	0.0391864	0.0170847	0.00657627	NA	0.0383729	0.175458	0.0127458	NA	NA	NA	NA	NA	NA	NA	0.00854237	0.121085	NA	NA	NA	NA	3783809	308267	3557039	211643	151242
chr10	60012944	60027694	ENST00000373935	-	ENSG00000151151	IPMK	protein_coding	1475	0.396339	6.77966e-05	0.00359322	0.00162712	0.00149153	0.0302373	0.00542373	0.00915254	NA	NA	0.352	NA	0.0832542	NA	NA	NA	NA	NA	NA	0.00216949	0.172542	NA	NA	NA	NA	1866660	1520811	5910277	1200	76416
chr10	96162261	96177011	ENST00000225235	+	ENSG00000108239	TBC1D12	protein_coding	1475	0.41078	6.77966e-05	NA	0.0040678	0.00183051	0.0268475	0.00318644	0.0110508	0.000610169	0.0185085	0.0562712	0.00691525	NA	NA	NA	NA	NA	NA	NA	0.00983051	0.226237	NA	NA	NA	NA	103312	499770	795068	39578	133426
chr10	962814	977564	ENST00000406525	-	ENSG00000107929	LARP4B	protein_coding	1475	0.437356	0.000135593	NA	NA	0.015661	0.0399322	0.00311864	0.00779661	0.000881356	0.0249492	0.0269831	0.00745763	0.0855593	NA	NA	NA	NA	NA	NA	0.00494915	0.264339	NA	NA	0.00833898	NA	5862	108399	636987	56784	67845
chr1	100700640	100715390	ENST00000370132	-	ENSG00000137992	DBT	protein_coding	1475	0.402915	0.000271186	0.00318644	0.00155932	0.00216949	0.0310508	0.00928814	0.0115254	0.000677966	0.0218983	0.136746	0.0124068	0.0374915	NA	NA	NA	NA	NA	NA	0.0117966	0.269695	NA	NA	NA	NA	76879	622550	59336	16323	55654
chr11	118307205	118321955	ENST00000534358	+	ENSG00000118058	MLL	protein_coding	1475	0.414237	0.00020339	0.00372881	0.00149153	0.00759322	0.016339	0.00989831	0.00711864	NA	NA	0.0194576	0.00942373	NA	NA	NA	NA	NA	NA	NA	0.004	0.127254	NA	NA	NA	NA	51004	26643	68037	1120233	90334
chr11	126081309	126096059	ENST00000533050	+	ENSG00000197798	FAM118B	protein_coding	1475	0.43078	0.00020339	0.00515254	0.00738983	0.00318644	0.0251525	0.0155254	0.00650847	NA	0.0502373	0.161085	0.0020339	NA	NA	NA	NA	NA	NA	NA	0.00318644	0.210644	0.00467797	NA	NA	NA	17625	310768	11504	308193	51572
chr11	46600925	46615675	ENST00000526606	-	ENSG00000110497	AMBRA1	protein_coding	1475	0.436	0.000135593	0.00189831	0.00684746	0.00142373	0.0384407	NA	0.0132881	NA	NA	0.180271	0.00284746	NA	0.020678	NA	NA	NA	NA	NA	0.00325424	0.424068	NA	NA	NA	NA	102236	9180	170300	23150	45816
chr11	63448918	63463668	ENST00000341307	+	ENSG00000133318	RTN3	protein_coding	1475	0.429898	6.77966e-05	NA	0.00135593	0.00379661	0.0313898	0.00501695	0.0124068	NA	0.00705085	0.113831	NA	NA	NA	NA	NA	NA	NA	NA	NA	0.364746	0.00366102	NA	NA	NA	92004	792563	38445	9835	78436
chr1	170631869	170646619	ENST00000553786	+	ENSG00000116132	PRRX1	protein_coding	1475	0.449695	0.000135593	0.00162712	NA	0.00494915	0.0286102	0.00528814	0.00338983	0.00277966	NA	0.0319322	0.0132881	NA	NA	NA	NA	NA	NA	NA	0.00983051	0.0564746	NA	NA	NA	NA	611616	108895	997426	587990	57175
chr1	173976685	173991435	ENST00000367696	-	ENSG00000135870	RC3H1	protein_coding	1475	0.392203	0.00020339	NA	NA	NA	0.0417627	0.00772881	0.0127458	NA	0.0224407	0.0797288	0.0162712	NA	NA	NA	NA	NA	NA	NA	0.00752542	0.249288	NA	NA	NA	NA	114310	990658	95661	137116	91083
chr1	179262925	179277675	ENST00000539888	+	ENSG00000057252	SOAT1	protein_coding	1475	0.422441	0.00020339	0.00332203	NA	0.00162712	0.0294237	0.00745763	0.0124746	NA	0.0503051	0.0762712	0.00610169	0.0282034	NA	NA	NA	NA	NA	NA	NA	0.315525	NA	NA	NA	NA	548494	197796	506176	64106	60017
chr11	93862094	93876844	ENST00000227638	+	ENSG00000110218	PANX1	protein_coding	1475	0.451797	6.77966e-05	0.00318644	0.00183051	0.00759322	0.0233898	0.0167458	0.00142373	0.000677966	0.0320678	0.141492	0.011661	0.0710508	NA	NA	NA	NA	NA	NA	0.00135593	0.0622373	NA	NA	NA	NA	325058	315598	248374	387391	53044
chr1	19522020	19536770	ENST00000375254	-	ENSG00000127481	UBR4	protein_coding	1475	0.423525	0.000542373	0.00169492	0.00881356	NA	0.0143051	0.00752542	0.00711864	NA	0.0712542	0.0302373	0.00562712	NA	NA	NA	NA	NA	NA	NA	0.00779661	0.222915	NA	NA	NA	NA	213944	7813	1472400	41304	135770
chr11	96061632	96076382	ENST00000440572	-	ENSG00000184384	MAML2	protein_coding	1475	0.423186	0.000135593	NA	0.00359322	0.00176271	0.0210169	0.00474576	0.00630508	NA	NA	0.0170847	NA	0.0317288	NA	NA	NA	NA	NA	NA	0.012339	0.109017	NA	NA	NA	NA	379011	9546	470525	46775	364270
chr1	198891789	198906539	ENST00000432296	-	ENSG00000229989	RP11-31E23.1	lincRNA	1475	0.319525	6.77966e-05	0.00162712	NA	NA	0.0466441	0.0131525	0.00298305	NA	NA	0.0108475	0.0131525	NA	NA	NA	NA	NA	NA	NA	0.0079322	0.0216271	NA	NA	NA	NA	38257	1468880	574991	1802146	129752
chr1	203595689	203610439	ENST00000357681	+	ENSG00000058668	ATP2B4	protein_coding	1475	0.494576	6.77966e-05	0.00176271	0.00352542	0.0152542	0.0302373	0.0147797	0.0079322	NA	0.00569492	0.0958644	0.00183051	0.00440678	NA	NA	NA	NA	NA	NA	0.00149153	0.231458	NA	NA	NA	NA	63019	316960	464500	659285	117520
chr1	207925402	207940152	ENST00000358170	+	ENSG00000117335	CD46	protein_coding	1475	0.408136	0.000338983	0.00345763	0.00169492	0.00162712	0.0585763	0.0149153	0.00413559	0.000610169	0.0280678	0.135797	NA	0.056678	NA	NA	NA	NA	NA	NA	NA	0.0696271	NA	NA	NA	NA	1791642	391091	9794	700980	43456
chr12	11802788	11817538	ENST00000396373	+	ENSG00000139083	ETV6	protein_coding	1475	0.444881	6.77966e-05	NA	NA	0.00223729	0.0302373	NA	0.00359322	0.000677966	0.0333559	0.0265085	0.00359322	NA	NA	NA	NA	NA	NA	NA	0.00738983	0.139797	NA	NA	NA	NA	667231	477065	426172	478564	241770
chr12	132434505	132449255	ENST00000537902	+	ENSG00000183495	EP400	protein_coding	1475	0.471254	0.00020339	NA	0.00162712	0.00942373	0.0301695	0.00440678	0.00223729	0.000610169	0.0166102	0.0795254	0.00135593	NA	NA	NA	NA	NA	NA	NA	0.00461017	0.317898	NA	NA	NA	NA	41263	6099	146634	1110694	40709
chr1	221900768	221915518	ENST00000366899	-	ENSG00000143507	DUSP10	protein_coding	1475	0.423864	0.00020339	0.00494915	0.00413559	0.00610169	0.0372881	0.00549153	0.00210169	0.00149153	0.0244068	0.0119322	0.00264407	0.0264407	NA	NA	NA	NA	NA	NA	0.00332203	0.0877288	NA	NA	NA	NA	1429675	815725	817118	875925	40752
chr12	25389120	25403870	ENST00000557334	-	ENSG00000133703	KRAS	protein_coding	1475	0.389898	0.00020339	0.0019661	NA	0.00908475	0.0485424	0.0101017	0.004	NA	0.0611525	0.12678	0.00691525	0.0145085	NA	NA	NA	NA	NA	NA	0.016	0.145966	NA	NA	NA	NA	261477	703717	5921	708093	41768
chr12	42719947	42734697	ENST00000337898	+	ENSG00000134283	PPHLN1	protein_coding	1475	0.394373	0.000338983	0.00338983	0.00142373	0.00108475	0.031661	0.00772881	0.00528814	NA	0.0637288	0.0931525	0.00142373	0.0681356	NA	NA	NA	NA	NA	NA	0.00135593	0.183593	NA	NA	NA	NA	1392799	3996419	1362464	15	119301
chr1	247079976	247094726	ENST00000326225	-	ENSG00000153207	AHCTF1	protein_coding	1475	0.42278	0.000135593	0.00345763	0.00305085	NA	0.0335593	0.0131525	0.0105763	0.000745763	NA	0.112949	0.00738983	0.0259661	NA	NA	NA	NA	NA	NA	0.00359322	0.370237	NA	NA	NA	NA	325161	14122	99938	2037803	92326
chr12	52345451	52360201	ENST00000257963	+	ENSG00000135503	ACVR1B	protein_coding	1475	0.429085	0.00020339	0.00155932	0.00135593	0.00820339	0.0200678	0.00657627	0.00461017	0.000610169	0.0635932	0.17661	0.0019661	0.0337627	NA	NA	NA	NA	NA	NA	0.00318644	0.158305	NA	NA	NA	NA	15296	28306	177328	560251	45411
chr12	96779588	96794338	ENST00000261211	-	ENSG00000059758	CDK17	protein_coding	1475	0.424949	0.00020339	NA	0.00149153	0.00935593	0.0429153	0.00989831	0.00684746	0.000677966	NA	0.0249492	0.0139661	0.0487458	NA	NA	NA	NA	NA	NA	0.00311864	0.293288	NA	NA	NA	NA	324973	2053280	92732	506662	122299
chr13	21462437	21477187	ENST00000490513	-	ENSG00000132953	XPO4	protein_coding	1475	0.428068	6.77966e-05	0.00345763	0.00345763	0.00447458	0.035661	0.00372881	0.0099661	NA	0.0655593	0.0998644	0.00318644	NA	NA	NA	NA	NA	NA	NA	NA	0.424339	NA	NA	NA	NA	89130	69988	171611	237465	47414
chr1	32479467	32494217	ENST00000484270	+	ENSG00000121774	KHDRBS1	protein_coding	1475	0.451729	6.77966e-05	0.00325424	0.00244068	0.0108475	0.0258983	0.00230508	0.00935593	NA	0.0183729	0.109017	0.0114576	NA	NA	NA	NA	NA	NA	NA	0.00657627	0.481695	NA	NA	NA	NA	19035	571940	162330	75479	46984
chr13	27131840	27146590	ENST00000361042	+	ENSG00000132970	WASF3	protein_coding	1475	0.417356	6.77966e-05	NA	NA	0.00562712	0.0383729	0.0175593	0.0020339	0.00189831	0.0496949	0.342441	0.00589831	0.0120678	NA	NA	NA	NA	NA	NA	0.00542373	0.0788475	NA	NA	NA	NA	653851	153271	468446	335332	131222
chr13	28179791	28194541	ENST00000316334	-	ENSG00000139517	LNX2	protein_coding	1475	0.404203	6.77966e-05	0.00162712	0.00183051	0.00440678	0.0177627	0.0131525	0.00122034	NA	0.0113898	0.153559	0.00542373	0.16	NA	NA	NA	NA	NA	NA	0.00128814	0.12861	NA	NA	NA	NA	129802	679941	144695	338	74491
chr13	33098220	33112970	ENST00000505213	-	ENSG00000244754	N4BP2L2	protein_coding	1475	0.371254	0.000271186	NA	NA	NA	0.0212203	0.0176949	0.00745763	NA	0.0376949	0.0947797	0.004	0.0689492	NA	NA	NA	NA	NA	NA	0.00684746	0.174915	NA	NA	NA	NA	70655	564301	99161	47593	95136
chr13	38429812	38444562	ENST00000447043	-	ENSG00000133107	TRPC4	protein_coding	1475	0.342847	6.77966e-05	0.00481356	0.00372881	0.00522034	0.0237966	0.0211525	0.00169492	NA	0.0212881	0.00508475	0.00555932	0.00569492	NA	NA	NA	NA	NA	NA	0.00867797	NA	NA	NA	NA	NA	770712	1139439	820811	479379	233522
chr13	42520506	42535256	ENST00000281496	-	ENSG00000102763	KIAA0564	protein_coding	1475	0.394102	0.000135593	0.00162712	NA	0.00427119	0.0304407	0.00738983	0.00786441	NA	0.0548475	0.229966	NA	0.115593	NA	NA	NA	NA	NA	NA	0.0019661	0.182576	NA	NA	NA	NA	657543	926865	450243	78915	241783
chr14	30382198	30396948	ENST00000331968	-	ENSG00000184304	PRKD1	protein_coding	1475	0.390373	6.77966e-05	0.00325424	0.00305085	0.00732203	0.0495593	0.00305085	0.00250847	NA	0.00427119	0.0376949	0.0141695	0.0311864	NA	NA	NA	NA	NA	NA	0.0039322	0.126102	NA	NA	NA	NA	4837853	948436	5446401	631380	351261
chr14	45431411	45446161	ENST00000361577	+	ENSG00000198718	FAM179B	protein_coding	1475	0.38061	0.000135593	0.004	NA	NA	0.0389153	NA	0.00847458	NA	0.0141695	0.512203	0.00461017	0.024	NA	NA	NA	NA	NA	NA	0.00562712	0.116475	NA	NA	NA	NA	81890	54951	113390	232	112223
chr14	78068366	78083116	ENST00000216484	-	ENSG00000100596	SPTLC2	protein_coding	1475	0.431458	6.77966e-05	0.00237288	0.00135593	NA	0.0480678	0.0109153	0.012	0.000610169	0.00711864	0.100881	0.00677966	0.016339	NA	NA	NA	NA	NA	NA	0.00637288	0.282644	NA	NA	NA	NA	119133	55632	107301	91308	110776
chr15	101777387	101792137	ENST00000254190	-	ENSG00000131873	CHSY1	protein_coding	1475	0.451051	0.000135593	0.00501695	0.00474576	0.00535593	0.0242712	0.00813559	0.00250847	0.000677966	0.0468475	0.154305	0.00488136	NA	NA	NA	NA	NA	NA	NA	NA	0.0774237	NA	NA	NA	NA	609692	19076	141820	566252	76209
chr15	22892663	22907413	ENST00000313077	+	ENSG00000068793	CYFIP1	protein_coding	1475	0.465831	6.77966e-05	NA	0.00583051	0.00786441	0.0331525	0.0039322	0.00725424	0.000610169	0.0270508	0.203729	0.00569492	0.0531525	NA	NA	NA	NA	NA	NA	NA	0.319593	NA	NA	NA	NA	NA	NA	NA	NA	113353
chr1	53004380	53019130	ENST00000484723	-	ENSG00000134744	ZCCHC11	protein_coding	1475	0.408407	0.000135593	0.00155932	0.00271186	0.00447458	0.0199322	0.0114576	0.0108475	NA	0.0311864	0.243458	0.0079322	NA	NA	NA	NA	NA	NA	NA	0.00372881	0.302305	NA	NA	NA	NA	108987	132883	95138	48912	107058
chr15	68709751	68724501	ENST00000423218	-	ENSG00000137809	ITGA11	protein_coding	1475	0.512339	6.77966e-05	0.00298305	0.00142373	0.0130169	0.024	0.00854237	0.00555932	0.000677966	0.0416949	0.168475	NA	0.0282712	NA	NA	NA	NA	NA	NA	NA	0.0845424	NA	NA	NA	NA	162421	346373	100861	146806	130451
chr15	77712754	77727504	ENST00000560498	+	ENSG00000140382	HMG20A	protein_coding	1475	0.368	0.000135593	0.00230508	0.00101695	0.00318644	0.0317288	0.0114576	0.008	NA	0.0297627	0.330102	0.00318644	0.00576271	NA	NA	NA	NA	NA	NA	NA	0.158441	NA	NA	NA	NA	688964	470153	532820	308	46746
chr15	99192200	99206950	ENST00000268035	+	ENSG00000140443	IGF1R	protein_coding	1475	0.45878	6.77966e-05	0.00155932	0.00372881	0.00847458	0.0214237	0.00508475	0.00610169	0.000610169	0.00657627	0.0245424	0.00535593	NA	NA	NA	NA	NA	NA	NA	0.00461017	0.0818305	NA	NA	NA	NA	95454	675132	444327	5993169	315559
chr16	3915977	3930727	ENST00000262367	-	ENSG00000005339	CREBBP	protein_coding	1475	0.453695	6.77966e-05	NA	NA	0.0117288	0.0431864	0.00664407	0.00264407	0.00128814	0.0272542	0.0463729	0.0258983	NA	NA	NA	NA	NA	NA	NA	0.0260339	0.101763	NA	NA	NA	NA	123129	81922	182631	451497	155672
chr16	48278207	48292957	ENST00000285737	+	ENSG00000102910	LONP2	protein_coding	1475	0.399254	0.000474576	0.00481356	0.0039322	NA	0.0364746	0.00257627	0.00569492	NA	0.0795932	0.0344407	0.0100339	0.0496271	NA	NA	NA	NA	NA	NA	NA	0.201695	NA	NA	NA	NA	71388	542773	76238	783192	113053
chr16	75032928	75047678	ENST00000335325	+	ENSG00000186187	ZNRF1	protein_coding	1475	0.458576	0.000271186	NA	NA	0.00535593	0.0296271	0.00922034	0.0105085	0.000677966	0.088339	0.0732203	0.00698305	NA	NA	NA	NA	NA	NA	NA	0.00698305	0.226305	NA	NA	NA	NA	109492	692742	189999	13911	111964
chr1	70805667	70820417	ENST00000262346	-	ENSG00000118454	ANKRD13C	protein_coding	1475	0.402576	6.77966e-05	0.00325424	0.00494915	0.00135593	0.0330169	0.00284746	0.00955932	0.000610169	0.136814	0.133559	0.00142373	NA	NA	NA	0.00820339	NA	NA	NA	0.00325424	0.304	NA	NA	NA	NA	109056	708556	62716	75	93497
chr17	42962243	42976993	ENST00000426333	-	ENSG00000108883	EFTUD2	protein_coding	1475	0.441898	0.000542373	NA	0.00481356	0.00169492	0.0244746	0.00494915	0.00698305	0.00128814	0.0402034	0.286034	0.00461017	0.00786441	NA	NA	NA	NA	NA	NA	0.00291525	0.328678	NA	NA	NA	NA	28814	26454	107357	160	49338
chr17	57970447	57985197	ENST00000472940	+	ENSG00000108443	RPS6KB1	protein_coding	1475	0.453424	0.00020339	0.00338983	0.00440678	0.00230508	0.0335593	0.00840678	0.0130169	NA	NA	0.120814	0.00277966	NA	NA	NA	NA	NA	NA	NA	0.00583051	0.563593	NA	NA	NA	NA	667096	51749	19275	141	54375
chr17	58588830	58603580	ENST00000083182	-	ENSG00000062725	APPBP2	protein_coding	1475	0.419593	6.77966e-05	NA	0.00189831	NA	0.0296949	0.00481356	0.00766102	NA	0.0877288	0.0810169	0.00210169	NA	NA	NA	NA	NA	NA	NA	0.0124068	0.384814	NA	NA	NA	NA	93994	1064213	535794	73963	83060
chr17	61627822	61642572	ENST00000310827	+	ENSG00000136485	DCAF7	protein_coding	1475	0.419864	0.000135593	NA	0.00162712	0.00467797	0.0187119	0.00983051	0.0039322	NA	0.051661	0.227254	0.00155932	NA	NA	NA	NA	NA	NA	NA	0.0135593	0.306712	NA	NA	NA	NA	10408	52081	105426	104100	43817
chr17	75137005	75151755	ENST00000430767	+	ENSG00000129657	SEC14L1	protein_coding	1475	0.456678	0.00040678	0.00162712	0.00169492	0.0124068	0.0399322	0.00684746	0.00861017	0.00115254	0.023322	0.0821695	0.0161356	0.0410169	NA	NA	NA	NA	NA	NA	0.00854237	0.18461	0.0103051	NA	NA	NA	100486	45937	993154	403512	76178
chr17	76822219	76836969	ENST00000312010	-	ENSG00000055483	USP36	protein_coding	1475	0.481424	0.000474576	0.00162712	NA	0.0101695	0.0189153	0.0134915	0.00454237	0.00318644	0.0907797	0.0622373	0.00183051	NA	NA	NA	NA	NA	NA	NA	0.00576271	0.264203	NA	NA	NA	NA	18593	12089	376330	183281	44004
chr18	158383	173133	ENST00000582707	+	ENSG00000101557	USP14	protein_coding	1475	0.415458	0.000338983	0.00691525	0.00162712	0.00332203	0.0322712	0.00291525	0.0101017	NA	0.161288	0.153695	0.0174915	NA	NA	NA	NA	NA	NA	NA	0.00508475	0.312949	NA	NA	NA	NA	NA	NA	NA	NA	53008
chr18	39535199	39549949	ENST00000262039	+	ENSG00000078142	PIK3C3	protein_coding	1475	0.354169	0.000271186	0.00345763	0.00162712	0.00583051	0.0355932	0.00610169	0.00820339	NA	0.04	0.0867119	0.00149153	NA	NA	NA	NA	NA	NA	NA	0.00894915	0.122373	NA	NA	NA	NA	2684938	4729911	3852374	434638	126245
chr18	9334765	9349515	ENST00000262120	+	ENSG00000128791	TWSG1	protein_coding	1475	0.388068	0.000135593	0.00352542	0.00230508	0.00508475	0.0250847	NA	0.00549153	NA	0.0202034	0.238576	0.0136271	0.0324746	NA	NA	NA	NA	NA	NA	0.0111864	0.195322	NA	NA	NA	NA	100764	48782	172026	4037713	67653
chr1	99127236	99141986	ENST00000370189	+	ENSG00000162627	SNX7	protein_coding	1475	0.386576	0.00020339	0.00345763	0.00155932	0.00244068	0.0219661	0.0234576	0.00549153	NA	0.0579661	0.140136	0.00135593	0.119932	NA	NA	NA	NA	NA	NA	0.00847458	0.111322	NA	NA	NA	NA	562611	1846631	1007022	615509	98818
chr20	21283942	21298692	ENST00000377191	+	ENSG00000088930	XRN2	protein_coding	1475	0.409356	0.000135593	NA	0.00169492	NA	0.0341695	0.0248136	0.0122034	0.000271186	0.0511186	0.387186	NA	0.0587119	NA	NA	NA	NA	NA	NA	0.00169492	0.264746	NA	NA	NA	NA	2007430	56684	2031213	590676	86521
chr20	40232383	40247133	ENST00000373233	-	ENSG00000124177	CHD6	protein_coding	1475	0.409966	0.000135593	0.00169492	0.00386441	0.00969492	0.0412203	0.0139661	0.00657627	0.000610169	0.0641356	0.0799322	0.0180339	0.0107797	NA	NA	NA	NA	NA	NA	NA	0.142847	NA	NA	NA	NA	278394	2493203	217911	1839370	216392
chr2	109150857	109165607	ENST00000544547	+	ENSG00000169756	LIMS1	protein_coding	1475	0.414508	6.77966e-05	0.00481356	NA	0.00128814	0.0252881	0.0145763	0.00677966	NA	0.101831	0.0896271	0.00372881	0.0482712	NA	NA	NA	NA	NA	NA	0.00522034	0.163661	NA	NA	NA	NA	145079	25003	1109518	2340062	150189
chr2	110357033	110371783	ENST00000397712	-	ENSG00000186522	SEPT10	protein_coding	1475	0.427593	0.000271186	NA	0.00210169	0.00386441	0.0381695	0.0260339	0.0110508	NA	0.0228475	0.150847	0.0105085	0.0808814	NA	NA	NA	NA	NA	NA	0.00745763	0.244	NA	NA	NA	NA	3520988	597322	69576	127	71224
chr2	128554011	128568761	ENST00000436787	-	ENSG00000136709	WDR33	protein_coding	1475	0.419322	0.00020339	0.00305085	NA	NA	0.0304407	0.0100339	0.0111186	NA	0.00705085	0.100542	0.00291525	NA	NA	NA	NA	NA	NA	0.00623729	0.00318644	0.418508	NA	NA	NA	NA	89401	35078	67354	279992	84535
chr2	159825146	159839896	ENST00000454300	+	ENSG00000115183	TANC1	protein_coding	1475	0.431458	6.77966e-05	0.00169492	0.00698305	0.00447458	0.0411525	0.00583051	0.00691525	NA	0.0644068	0.0174915	0.00854237	0.0207458	NA	NA	NA	NA	NA	NA	0.00732203	0.240542	NA	NA	NA	NA	703863	287206	227157	1092772	264020
chr2	181845112	181859862	ENST00000392415	+	ENSG00000170035	UBE2E3	protein_coding	1475	0.37322	0.000474576	0.00162712	0.00135593	0.00420339	0.0408814	0.0105085	0.00698305	0.00122034	0.162373	0.0272542	0.0148475	0.0105763	NA	NA	NA	NA	NA	NA	0.00277966	0.0322712	NA	NA	NA	NA	436506	2304103	1904492	973332	83038
chr3	107795122	107809872	ENST00000355354	-	ENSG00000196776	CD47	protein_coding	1475	0.374102	0.000135593	0.00338983	0.00522034	0.00488136	0.0231186	0.0191864	0.00433898	NA	NA	0.202102	NA	0.0286102	NA	NA	NA	NA	NA	NA	0.00840678	0.0669831	NA	NA	NA	NA	2181985	69786	239823	498464	47726
chr3	11670648	11685398	ENST00000430365	-	ENSG00000144560	VGLL4	protein_coding	1475	0.434644	0.000135593	NA	NA	0.00244068	0.0288136	0.00142373	0.00915254	NA	NA	0.130034	0.00244068	0.0272542	NA	NA	NA	NA	NA	NA	NA	0.147458	NA	NA	NA	NA	1282540	146520	46259	643950	85448
chr3	15886528	15901278	ENST00000399451	-	ENSG00000206560	ANKRD28	protein_coding	1475	0.407525	6.77966e-05	0.00515254	0.004	0.0019661	0.0322034	0.0157966	0.00576271	NA	0.0404068	0.19261	NA	0.184746	NA	NA	NA	NA	NA	NA	0.0162034	0.125153	NA	NA	NA	NA	218148	397289	173953	405388	192535
chr3	183587946	183602696	ENST00000421484	-	ENSG00000175193	PARL	protein_coding	1475	0.431254	6.77966e-05	0.00149153	NA	0.00257627	0.0149153	0.00169492	0.0105085	NA	0.221017	0.0492203	NA	0.0414915	NA	NA	NA	NA	NA	NA	0.0178983	0.301356	NA	NA	NA	NA	19303	35027	32283	250113	55399
chr3	37284668	37299418	ENST00000361924	+	ENSG00000144674	GOLGA4	protein_coding	1475	0.395051	0.00040678	NA	0.00549153	NA	0.0446102	0.0080678	0.0100339	NA	0.00576271	0.109627	0.00752542	0.0534237	NA	NA	NA	NA	NA	NA	0.0227797	0.202576	NA	NA	NA	NA	116299	192331	724318	66817	123574
chr3	48116019	48130769	ENST00000383737	-	ENSG00000047849	MAP4	protein_coding	1475	0.454847	6.77966e-05	0.00386441	0.00501695	0.00535593	0.0327458	0.00942373	0.0105085	0.000677966	0.0132881	0.212068	0.00305085	NA	NA	NA	NA	NA	NA	NA	0.0200678	0.463322	NA	NA	NA	NA	267364	67898	199083	151826	238587
chr3	57741957	57756707	ENST00000295951	+	ENSG00000163681	SLMAP	protein_coding	1475	0.434576	0.000135593	0.00155932	0.00155932	NA	0.0389831	0.00786441	0.00589831	NA	0.00908475	0.0470508	NA	0.0290847	NA	NA	NA	NA	NA	NA	NA	0.33139	NA	NA	NA	NA	212169	194189	631399	63141	172938
chr3	63850233	63864983	ENST00000474112	+	ENSG00000163635	ATXN7	protein_coding	1475	0.393966	0.000135593	0.00176271	0.00522034	0.000542373	0.0279322	NA	0.00555932	NA	0.0457627	0.0286102	0.00698305	0.0884746	NA	NA	NA	NA	NA	NA	0.00447458	0.165763	NA	NA	NA	NA	99464	1530913	105997	636	132079
chr3	71099327	71114077	ENST00000485326	-	ENSG00000114861	FOXP1	protein_coding	1475	0.388407	0.00020339	0.00949153	NA	NA	0.0355254	NA	0.0111186	0.000949153	NA	0.0113898	0.00827119	NA	NA	NA	NA	NA	NA	NA	0.00237288	0.00454237	NA	NA	NA	NA	1944553	477043	1056589	1932041	49377
chr3	99357319	99372069	ENST00000261037	+	ENSG00000144810	COL8A1	protein_coding	1475	0.385424	6.77966e-05	0.00338983	NA	NA	0.028	NA	0.00359322	NA	0.0328814	0.0289492	0.00142373	NA	NA	NA	NA	NA	NA	NA	0.00576271	0.0810169	NA	NA	NA	NA	139358	1839946	154668	736786	160751
chr3	99580267	99595017	ENST00000476723	-	ENSG00000168386	FILIP1L	protein_coding	1475	0.38461	0.000135593	0.00481356	0.00366102	NA	0.0226441	0.00149153	0.00440678	0.00101695	0.0385085	0.0635254	0.00542373	NA	NA	NA	NA	NA	NA	NA	0.00359322	0.0505085	NA	NA	NA	NA	934484	487285	39859	384668	46032
chr4	144434616	144449366	ENST00000283131	+	ENSG00000153147	SMARCA5	protein_coding	1475	0.36278	0.000610169	0.00162712	NA	0.0040678	0.0427797	0.0212203	0.00650847	NA	0.00535593	0.0463051	0.00928814	0.023322	NA	NA	NA	NA	NA	NA	0.00135593	0.0713898	NA	NA	NA	NA	6008	38898	1441696	667012	44023
chr4	169753156	169767906	ENST00000393726	+	ENSG00000129116	PALLD	protein_coding	1475	0.439593	0.000135593	0.00169492	0.00135593	0.00772881	0.0135593	0.00650847	0.00311864	NA	0.0447458	0.0528814	NA	NA	NA	NA	NA	NA	NA	NA	0.00169492	0.0857627	NA	NA	NA	NA	748515	3488842	115585	351518	81964
chr4	177699131	177713881	ENST00000280193	-	ENSG00000150630	VEGFC	protein_coding	1475	0.388271	6.77966e-05	NA	0.00366102	0.004	0.0399322	0.00576271	0.00867797	0.00183051	0.0395932	NA	0.0174915	NA	NA	NA	NA	NA	NA	NA	0.00298305	0.132271	NA	NA	NA	NA	2468479	638047	420485	517109	109192
chr4	37978931	37993681	ENST00000446803	+	ENSG00000065882	TBC1D1	protein_coding	1475	0.43383	6.77966e-05	0.00467797	0.00386441	0.00691525	0.0296949	0.00772881	0.00684746	NA	0.0138305	0.0949153	0.00847458	0.0581695	NA	NA	NA	NA	NA	NA	0.00155932	0.192136	NA	NA	NA	NA	646858	16300	806397	290932	112755
chr4	55095264	55110014	ENST00000257290	+	ENSG00000134853	PDGFRA	protein_coding	1475	0.492203	0.000338983	0.00162712	NA	0.00786441	0.0441356	0.0167458	0.00420339	0.000610169	NA	0.0180339	0.00908475	0.248407	NA	NA	NA	NA	NA	NA	0.00142373	0.141898	NA	NA	NA	NA	1077123	769161	1163395	164449	69150
chr5	10353815	10368565	ENST00000449913	+	ENSG00000145495	2013-03-06	protein_coding	1475	0.396068	0.00020339	0.00332203	0.00813559	0.00216949	0.0181017	0.0142373	0.00827119	NA	0.135051	0.0732881	0.00711864	0.096678	NA	NA	NA	NA	NA	NA	0.0117288	0.178915	NA	NA	NA	NA	48158	87314	285526	45647	80258
chr5	109025067	109039817	ENST00000261483	+	ENSG00000112893	MAN2A1	protein_coding	1475	0.422712	0.000135593	0.00467797	NA	0.0107797	0.0347119	0.00447458	0.00616949	NA	0.0708475	0.0553898	NA	NA	NA	NA	0.0157288	NA	NA	NA	0.00894915	0.0637288	NA	NA	NA	NA	1009686	501694	1768954	279392	177812
chr5	114583819	114598569	ENST00000419445	-	ENSG00000164219	PGGT1B	protein_coding	1475	0.364475	0.000135593	0.00318644	0.00386441	NA	0.0368136	0.00881356	0.00413559	0.000610169	0.0798644	0.088339	0.00244068	0.0349831	NA	0.0040678	NA	NA	NA	NA	NA	0.092678	NA	NA	NA	NA	2300538	4315	726372	579049	52042
chr5	126112315	126127065	ENST00000460265	+	ENSG00000113368	LMNB1	protein_coding	1475	0.470237	6.77966e-05	0.00488136	0.00176271	0.0020339	0.0284746	0.00461017	0.00874576	0.00149153	0.056678	0.0786441	0.0040678	NA	NA	NA	NA	NA	NA	NA	0.0153898	0.391797	NA	NA	NA	NA	700993	149371	51090	181233	60391
chr5	148521046	148535796	ENST00000326685	+	ENSG00000173210	ABLIM3	protein_coding	1475	0.444203	6.77966e-05	0.00494915	NA	0.00528814	0.0242034	0.00752542	0.00379661	NA	0.0341017	0.156271	0.00135593	0.0611525	NA	NA	NA	NA	NA	NA	0.00359322	0.119458	NA	NA	NA	NA	90354	312849	313798	78309	119059
chr5	149379884	149394634	ENST00000503427	+	ENSG00000113716	HMGXB3	protein_coding	1475	0.43478	0.000474576	NA	0.00305085	0.00352542	0.0370847	0.00949153	0.00630508	0.000610169	0.0208814	0.133085	0.00569492	NA	NA	NA	NA	NA	NA	NA	0.00569492	0.183864	NA	NA	NA	NA	317317	12921	73517	448877	52502
chr5	5422807	5437557	ENST00000296564	+	ENSG00000164151	KIAA0947	protein_coding	1475	0.404	0.00020339	0.00183051	0.00210169	NA	0.0264407	0.0271186	0.00447458	0.000677966	0.015661	0.296339	0.00162712	0.0459661	NA	NA	NA	NA	NA	NA	NA	0.0571525	NA	NA	NA	NA	1170692	2667296	909231	2671038	67540
chr5	54588800	54603550	ENST00000251636	-	ENSG00000067248	DHX29	protein_coding	1475	0.386983	0.000474576	0.00501695	0.00169492	NA	0.0354576	0.0079322	0.00305085	NA	0.0387797	0.173288	0.00135593	0.0842034	NA	NA	NA	NA	NA	NA	0.00284746	0.163051	NA	NA	NA	NA	957147	117132	100421	25	51477
chr6	132819587	132834337	ENST00000367937	-	ENSG00000079950	STX7	protein_coding	1475	0.401288	0.000135593	0.00508475	NA	NA	0.0326102	0.00542373	0.00772881	0.000610169	0.019661	0.0978305	0.00155932	0.0154576	NA	NA	NA	NA	NA	NA	0.00867797	0.0972203	NA	NA	NA	NA	71673	1656046	578042	301370	51484
chr6	149068464	149083214	ENST00000367463	+	ENSG00000111962	UST	protein_coding	1475	0.431322	6.77966e-05	0.00162712	0.00345763	0.00583051	0.0350508	0.00535593	0.00562712	NA	0.0119322	0.133559	0.0059661	0.0252203	NA	NA	NA	NA	NA	NA	0.00894915	0.0864407	NA	NA	NA	NA	530971	195280	717166	1943504	329662
chr6	15246527	15261277	ENST00000341776	+	ENSG00000008083	JARID2	protein_coding	1475	0.447186	0.000271186	0.00162712	0.00535593	0.00467797	0.0261695	0.0151186	0.00861017	0.000610169	0.0327458	0.032339	0.0256949	NA	NA	NA	NA	NA	NA	NA	NA	0.158644	NA	NA	NA	NA	842789	1109379	236504	1431735	275725
chr6	17691906	17706656	ENST00000537253	-	ENSG00000124789	NUP153	protein_coding	1475	0.439458	6.77966e-05	NA	0.0111186	0.00189831	0.0223729	0.00915254	0.0142373	0.000813559	0.0398644	0.023661	0.00345763	0.00969492	NA	NA	NA	NA	NA	NA	0.00223729	0.414102	NA	NA	NA	NA	904935	52757	54706	448962	90382
chr6	20534688	20549438	ENST00000378624	+	ENSG00000145996	CDKAL1	protein_coding	1475	0.399458	0.000271186	0.00155932	NA	NA	0.0200678	0.00155932	0.008	NA	0.0562034	0.340949	0.00366102	0.0269831	NA	NA	NA	NA	NA	NA	0.00230508	0.235119	NA	NA	NA	NA	1019283	40743	4075516	322018	697947
chr6	42531800	42546550	ENST00000372899	+	ENSG00000024048	UBR2	protein_coding	1475	0.395729	0.000135593	0.00155932	0.00305085	NA	0.0482712	0.00684746	0.0111864	NA	0.0143729	0.174441	0.00162712	0.00576271	NA	NA	NA	NA	NA	NA	0.00325424	0.242034	NA	NA	NA	NA	216993	483156	92532	112017	129442
chr7	114562209	114576959	ENST00000393486	+	ENSG00000135272	MDFIC	protein_coding	1475	0.381424	0.000271186	0.00555932	0.00162712	0.00149153	0.0418305	0.0219661	0.00745763	NA	0.0407458	0.145898	0.00569492	NA	NA	NA	NA	NA	NA	NA	0.00433898	0.0708475	NA	NA	NA	NA	1248337	2431266	6386695	1803572	97047
chr7	128680448	128695198	ENST00000471234	-	ENSG00000064419	TNPO3	protein_coding	1475	0.407729	0.000135593	0.00827119	0.00155932	0.00162712	0.0242034	0.0103729	0.00820339	0.000610169	0.00786441	0.139119	NA	0.0474576	NA	NA	NA	NA	NA	NA	0.00345763	0.215458	NA	NA	NA	NA	605162	775374	143097	78	100056
chr7	39773231	39787981	ENST00000340510	+	ENSG00000188185	LINC00265	lincRNA	1475	0.438712	6.77966e-05	0.00366102	0.00237288	NA	0.043322	0.0122712	0.00820339	0.00122034	0.059322	0.0943051	0.00962712	0.0442712	NA	NA	NA	NA	NA	NA	0.0114576	0.304271	NA	NA	NA	0.0112542	176727	25508	359110	824431	59460
chr7	91570181	91584931	ENST00000356239	+	ENSG00000127914	AKAP9	protein_coding	1475	0.390305	6.77966e-05	NA	NA	0.0020339	0.0250169	0.00284746	0.00888136	NA	0.00915254	0.161831	0.00847458	NA	NA	NA	NA	NA	NA	NA	0.00616949	0.228746	NA	NA	NA	NA	265366	672049	131281	60165	169806
chr8	108495533	108510283	ENST00000297450	-	ENSG00000154188	ANGPT1	protein_coding	1475	0.370847	0.000135593	0.00155932	NA	NA	0.0371525	0.00318644	0.00379661	NA	0.109898	0.0727458	0.00298305	NA	NA	NA	NA	NA	NA	NA	0.00176271	0.0835932	NA	NA	NA	NA	2869031	703688	705362	945569	248562
chr8	136469700	136484450	ENST00000355849	+	ENSG00000131773	KHDRBS3	protein_coding	1475	0.424136	0.00020339	0.00162712	0.00718644	0.00549153	0.0295593	0.00989831	0.00433898	NA	0.0128814	0.109898	0.011661	NA	NA	NA	NA	NA	NA	NA	NA	0.145627	NA	NA	NA	NA	5011696	2608648	4232885	744408	190153
chr8	99129540	99144290	ENST00000401707	+	ENSG00000104356	POP1	protein_coding	1475	0.423932	0.00040678	0.00176271	0.000338983	0.00162712	0.027661	NA	0.00766102	NA	0.0728136	0.0594576	0.00135593	0.0216949	NA	NA	NA	NA	NA	NA	NA	0.301017	NA	NA	NA	NA	269709	264710	34846	122	42522
chr9	102846572	102861322	ENST00000262455	-	ENSG00000023318	ERP44	protein_coding	1475	0.370915	6.77966e-05	0.00332203	NA	0.00155932	0.0279322	0.0099661	0.00650847	NA	0.0613559	0.142915	0.00637288	NA	NA	NA	NA	NA	NA	NA	0.00861017	0.177695	NA	NA	NA	NA	837076	203034	84504	188	119861
chr9	117865786	117880536	ENST00000350763	-	ENSG00000041982	TNC	protein_coding	1475	0.411051	0.00020339	0.00583051	0.00291525	0.0020339	0.0364068	0.0258983	0.00332203	0.000677966	0.0609492	0.0176271	NA	0.0592542	NA	NA	NA	NA	NA	NA	NA	0.185288	NA	NA	NA	NA	572800	1306967	431833	1035534	97723
chr9	134269480	134284230	ENST00000405995	+	ENSG00000130723	PRRC2B	protein_coding	1475	0.487051	6.77966e-05	0.00332203	NA	0.00786441	0.019661	0.00664407	0.0121356	0.000610169	NA	0.0865085	0.0250847	NA	NA	NA	NA	NA	NA	NA	0.00135593	0.291254	NA	NA	NA	NA	51571	160389	89702	455025	106104
chr9	74369050	74383800	ENST00000377044	-	ENSG00000135048	TMEM2	protein_coding	1475	0.404271	6.77966e-05	0.00481356	0.00569492	0.00447458	0.0391186	0.00142373	0.00732203	NA	NA	0.0340339	NA	0.0671864	NA	NA	NA	NA	NA	NA	0.0227119	0.123186	NA	NA	NA	NA	1314227	93567	1374011	142622	85518
chr9	91003334	91018084	ENST00000375859	+	ENSG00000106723	SPIN1	protein_coding	1475	0.44061	0.000135593	NA	0.00691525	0.00169492	0.027661	0.0117288	0.0106441	0.000677966	0.0655593	0.0861695	0.0182373	0.0797966	NA	NA	NA	NA	NA	NA	0.00345763	0.268203	NA	NA	NA	NA	106681	656950	577351	413639	90275
chrY	2803112	2817862	ENST00000431102	+	ENSG00000067646	ZFY	protein_coding	1475	0.394237	0.000135593	0.00508475	0.00250847	0.00420339	0.0435254	NA	0.0120678	0.00128814	0.0580339	0.0738983	0.00467797	NA	NA	NA	NA	NA	NA	NA	0.00657627	0.280407	NA	NA	NA	NA	NA	NA	NA	NA	47434
chr10	101419263	101433763	ENST00000370489	+	ENSG00000198018	ENTPD7	protein_coding	1450	0.401931	0.000206897	NA	0.0037931	0.00241379	0.0277241	0.0126897	0.01	NA	0.138828	0.151793	NA	0.0351724	NA	NA	NA	NA	NA	NA	0.00703448	0.246759	NA	NA	NA	NA	32694	265176	9241	39042	46734
chr10	131934663	131949163	ENST00000368644	+	ENSG00000108010	GLRX3	protein_coding	1450	0.436207	0.000137931	0.00165517	0.0037931	0.00193103	0.0143448	0.00744828	0.0082069	0.00062069	NA	0.100138	0.00144828	0.0144138	NA	NA	NA	NA	NA	NA	0.00606897	0.302552	NA	NA	NA	NA	1773296	2683883	1806540	25582	43977
chr10	27135516	27150016	ENST00000376134	-	ENSG00000136754	ABI1	protein_coding	1450	0.410414	6.89655e-05	0.00158621	0.00910345	0.00144828	0.0375172	NA	0.00841379	NA	0.107931	0.0877931	0.00586207	NA	NA	NA	NA	NA	NA	NA	0.0111034	0.295103	NA	NA	NA	NA	1868483	143028	74290	293736	114491
chr10	32330859	32345359	ENST00000302418	-	ENSG00000170759	KIF5B	protein_coding	1450	0.390897	0.000137931	NA	0.00268966	0.00186207	0.0296552	0.0148276	0.00475862	NA	0.0332414	0.121379	NA	0.0245517	NA	NA	NA	NA	NA	NA	0.00544828	0.128414	NA	NA	NA	NA	87589	212499	486617	389681	47421
chr10	5726801	5741301	ENST00000328090	+	ENSG00000108021	FAM208B	protein_coding	1450	0.405931	0.000137931	0.00324138	0.00137931	0.00634483	0.0357241	0.0125517	0.00310345	NA	0.0628966	0.312483	0.00386207	NA	NA	NA	NA	NA	NA	NA	NA	0.137448	NA	NA	NA	NA	165412	226375	40384	18243	78902
chr10	79671878	79686378	ENST00000372388	-	ENSG00000151208	DLG5	protein_coding	1450	0.485448	0.000137931	NA	NA	NA	0.0134483	0.00131034	0.0105517	NA	0.0182759	0.0948966	0.00572414	0.0165517	NA	NA	NA	NA	NA	NA	0.0062069	0.268966	NA	0.0196552	NA	NA	248801	48528	2655171	107139	135827
chr10	88267072	88281572	ENST00000342368	-	ENSG00000062650	WAPAL	protein_coding	1450	0.424138	0.000137931	0.00337931	0.00689655	0.00358621	0.0249655	0.010069	0.0103448	NA	0.00482759	0.143862	0.00248276	NA	NA	NA	NA	NA	NA	NA	0.00386207	0.274552	NA	NA	NA	NA	6276244	413725	1963296	234823	86559
chr10	88516396	88530896	ENST00000224764	+	ENSG00000107779	BMPR1A	protein_coding	1450	0.424207	6.89655e-05	0.00324138	0.00806897	0.00137931	0.0311724	0.0114483	0.00565517	0.000689655	0.0404828	0.0658621	0.00186207	0.0988276	NA	NA	NA	NA	NA	NA	0.00137931	0.246414	NA	NA	NA	NA	171791	2238120	138901	234855	168546
chr1	112162399	112176899	ENST00000433097	+	ENSG00000116473	RAP1A	protein_coding	1450	0.371379	0.000206897	0.00151724	0.00137931	0.00524138	0.0322759	0.0197241	0.00613793	0.000758621	0.0247586	0.107103	0.012069	NA	NA	NA	NA	NA	NA	0.0106207	0.0108966	0.0943448	NA	NA	NA	NA	95790	141265	62286	170569	84628
chr11	122526383	122540883	ENST00000284273	+	ENSG00000154127	UBASH3B	protein_coding	1450	0.490414	6.89655e-05	0.00655172	0.00358621	0.00551724	0.0173103	0.0113103	0.00462069	NA	NA	0.0317241	0.00558621	0.0647586	NA	NA	NA	NA	NA	NA	0.00351724	0.319103	NA	NA	NA	NA	187089	1342264	361816	452613	158798
chr11	128377705	128392205	ENST00000535549	-	ENSG00000134954	ETS1	protein_coding	1450	0.423103	6.89655e-05	0.00496552	0.00241379	0.00331034	0.023931	0.00151724	0.00496552	NA	0.00675862	NA	0.00489655	NA	NA	NA	NA	NA	NA	NA	0.00593103	0.100552	NA	NA	NA	NA	1481439	377254	2067672	171605	63549
chr1	115039281	115053781	ENST00000358465	-	ENSG00000197323	TRIM33	protein_coding	1450	0.420069	6.89655e-05	0.00510345	0.00344828	0.00227586	0.0512414	0.0268276	0.006	NA	0.19531	0.118	0.00172414	0.0371724	NA	NA	NA	NA	NA	NA	0.0147586	0.28069	NA	NA	NA	NA	566040	56399	488906	1130792	118382
chr1	155518098	155532598	ENST00000548830	-	ENSG00000116539	ASH1L	protein_coding	1450	0.443724	0.000206897	0.00331034	0.00413793	0.00165517	0.0197931	0.0196552	0.0135862	0.00062069	0.032069	0.0984138	NA	NA	NA	NA	NA	NA	NA	NA	0.011931	0.453724	NA	NA	NA	NA	176425	96634	191689	47408	81396
chr11	9482069	9496569	ENST00000396604	+	ENSG00000166478	ZNF143	protein_coding	1450	0.447931	0.000689655	0.00310345	NA	NA	0.0282759	0.00144828	0.00896552	NA	NA	0.131103	0.00544828	NA	NA	NA	NA	NA	NA	NA	0.00503448	0.396345	NA	NA	NA	NA	73158	12395	254247	145754	67532
chr1	226483070	226497570	ENST00000366808	-	ENSG00000183814	LIN9	protein_coding	1450	0.439517	0.000413793	NA	0.00172414	0.00351724	0.0488276	0.0171724	0.0077931	NA	0.0127586	0.107103	0.0124138	NA	NA	NA	NA	NA	NA	NA	0.00227586	0.320414	0.00703448	NA	NA	NA	83147	50821	197867	560702	78712
chr12	29519586	29534086	ENST00000360150	-	ENSG00000087502	ERGIC2	protein_coding	1450	0.348552	0.000482759	0.00186207	0.00310345	NA	0.0491034	0.00806897	0.00717241	NA	0.0375172	0.127724	0.00765517	0.0282069	NA	NA	NA	NA	NA	NA	0.0037931	0.104207	NA	NA	NA	0.0318621	2326747	1247828	7080	1414528	43801
chr12	59299803	59314303	ENST00000320743	-	ENSG00000139263	LRIG3	protein_coding	1450	0.399586	0.000275862	0.00158621	NA	NA	0.0369655	0.0168276	0.00413793	0.00137931	0.0338621	0.0133793	0.00641379	NA	NA	NA	NA	NA	NA	NA	NA	0.0563448	NA	NA	NA	NA	944356	3681227	923251	768822	48372
chr12	59989848	60004348	ENST00000552432	+	ENSG00000118596	SLC16A7	protein_coding	1450	0.386	0.000137931	0.00324138	NA	0.002	0.0471724	0.0102069	0.00558621	0.00165517	0.0224828	0.0528276	0.00165517	0.0674483	NA	NA	NA	NA	NA	NA	0.00917241	0.125862	NA	NA	NA	NA	53277	1638796	2965682	675586	184146
chr12	64845660	64860160	ENST00000331710	+	ENSG00000183735	TBK1	protein_coding	1450	0.397862	0.000413793	0.00510345	0.00406897	NA	0.0337241	0.0122069	0.00882759	NA	0.0204138	0.112621	0.0121379	0.0426897	NA	NA	NA	NA	NA	NA	0.00482759	0.213655	NA	NA	NA	NA	118632	3197	221561	229584	50228
chr12	95867296	95881796	ENST00000535095	+	ENSG00000111142	METAP2	protein_coding	1450	0.400552	0.000413793	0.00151724	0.00696552	NA	0.0346897	0.0135172	0.00668966	NA	0.0386207	0.159931	0.00662069	NA	NA	NA	NA	NA	NA	NA	0.00186207	0.238621	NA	NA	NA	NA	345412	163536	144286	256056	40822
chr13	48560962	48575462	ENST00000378645	-	ENSG00000136143	SUCLA2	protein_coding	1450	0.386552	0.000413793	0.00165517	0.00572414	NA	0.0375172	0.00613793	0.0104138	NA	0.0114483	0.145172	NA	0.0134483	NA	NA	NA	NA	NA	NA	0.00296552	0.189241	NA	NA	NA	NA	1164095	74629	1208287	36240	58671
chr13	51483814	51498314	ENST00000336617	+	ENSG00000136104	RNASEH2B	protein_coding	1450	0.415517	0.000206897	NA	0.0077931	0.00406897	0.0308276	0.00186207	0.0077931	NA	0.012	0.240138	0.00827586	NA	NA	NA	NA	NA	NA	NA	0.00317241	0.0983448	NA	NA	NA	NA	634669	804381	411886	784137	47052
chr1	39571083	39585583	ENST00000524432	+	ENSG00000127603	MACF1	protein_coding	1450	0.442483	6.89655e-05	NA	0.00158621	0.00324138	0.0222069	0.0114483	0.0114483	NA	NA	0.143655	0.00310345	NA	NA	NA	NA	NA	NA	NA	0.0128276	0.207655	NA	NA	0.00248276	NA	264092	70775	376868	232033	217597
chr14	102829300	102843800	ENST00000359520	+	ENSG00000196663	TECPR2	protein_coding	1450	0.458897	0.000137931	0.00165517	0.00317241	0.00572414	0.032069	NA	0.0124138	NA	0.0384138	0.204345	0.00606897	NA	NA	NA	NA	NA	NA	NA	NA	0.318345	0.00462069	NA	NA	NA	189695	20256	103897	47	139518
chr14	104095514	104110014	ENST00000348520	+	ENSG00000126214	KLC1	protein_coding	1450	0.474138	6.89655e-05	0.00331034	0.002	0.010069	0.0282759	0.015931	0.0108276	0.000827586	NA	0.131586	0.0166207	0.0408276	NA	NA	NA	NA	NA	NA	0.0128276	0.461448	NA	NA	NA	NA	46566	38278	28439	66363	72374
chr1	47765319	47779819	ENST00000360380	-	ENSG00000123473	STIL	protein_coding	1450	0.410621	0.000482759	0.00668966	0.00351724	NA	0.0314483	0.00455172	0.00524138	NA	0.026	0.0801379	0.00151724	0.0736552	NA	NA	NA	NA	NA	NA	NA	0.342276	NA	NA	NA	NA	555083	117987	909129	19649	64008
chr14	91962324	91976824	ENST00000554390	-	ENSG00000100796	SMEK1	protein_coding	1450	0.434	6.89655e-05	NA	0.00331034	NA	0.0131034	0.00841379	0.00944828	NA	0.0142069	0.0442759	0.00475862	NA	NA	NA	NA	NA	NA	NA	0.0246897	0.379586	NA	NA	NA	NA	409831	269442	245121	611473	48426
chr15	64633942	64648442	ENST00000303032	-	ENSG00000169118	CSNK1G1	protein_coding	1450	0.40669	0.000137931	NA	NA	0.00296552	0.0543448	NA	0.00662069	0.00062069	0.0234483	0.101241	0.00772414	NA	NA	NA	NA	NA	NA	NA	0.00186207	0.317517	NA	NA	NA	NA	153088	8768	172009	31560	166837
chr16	1756184	1770684	ENST00000250894	+	ENSG00000138834	MAPK8IP3	protein_coding	1450	0.515103	0.000206897	0.00158621	NA	0.0166207	0.0352414	0.00751724	0.00986207	0.0022069	0.0133103	0.0608276	0.014069	NA	NA	NA	NA	NA	NA	NA	0.011931	0.303724	NA	NA	NA	NA	27044	4111	24136	94075	64134
chr16	71828604	71843104	ENST00000299980	-	ENSG00000166747	AP1G1	protein_coding	1450	0.437724	0.000275862	NA	0.00406897	0.00172414	0.0345517	NA	0.0138621	NA	0.0155862	0.0558621	0.00158621	NA	NA	NA	NA	NA	NA	NA	0.00441379	0.44731	NA	NA	NA	NA	10714	50478	1191533	36794	80191
chr17	13490744	13505244	ENST00000284110	-	ENSG00000153976	HS3ST3A1	protein_coding	1450	0.430276	6.89655e-05	0.00331034	0.00331034	0.00496552	0.0286897	0.0122759	0.00772414	0.00289655	0.0376552	0.0395862	0.00158621	NA	NA	NA	NA	NA	NA	NA	0.012	0.0731724	NA	NA	NA	NA	543863	1627851	794593	467474	106238
chr17	42566302	42580802	ENST00000335500	-	ENSG00000186566	GPATCH8	protein_coding	1450	0.406414	6.89655e-05	0.00186207	0.00448276	0.00310345	0.0273103	0.00303448	0.0102759	0.000689655	0.00689655	0.055931	0.00406897	0.0309655	NA	NA	NA	NA	NA	NA	0.00503448	0.33869	NA	NA	NA	NA	138585	174002	110332	54009	108150
chr17	49322898	49337398	ENST00000405860	-	ENSG00000011258	MBTD1	protein_coding	1450	0.383517	0.000275862	0.00165517	0.00406897	0.00627586	0.0293793	0.0233793	0.00931034	NA	0.0373103	0.30869	NA	NA	NA	NA	NA	NA	NA	NA	NA	0.200207	NA	NA	NA	NA	99172	3691860	48293	498	79461
chr18	13712091	13726591	ENST00000402563	-	ENSG00000177150	FAM210A	protein_coding	1450	0.410483	0.000137931	NA	0.00331034	0.00165517	0.0281379	0.00393103	0.00303448	NA	0.0208966	0.0412414	0.00186207	0.209448	NA	NA	NA	NA	NA	NA	0.00662069	0.0731724	NA	0.0197931	NA	NA	802257	349397	561540	112	63241
chr18	2655737	2670237	ENST00000320876	+	ENSG00000101596	SMCHD1	protein_coding	1450	0.406897	0.000206897	0.00158621	NA	0.00131034	0.0235862	0.0183448	0.00862069	0.000758621	0.00427586	0.232276	0.00696552	NA	NA	NA	NA	NA	NA	NA	0.014	0.263379	NA	NA	NA	NA	151290	39103	221254	343	149278
chr18	72922710	72937210	ENST00000322038	+	ENSG00000179981	TSHZ1	protein_coding	1450	0.429931	0.000206897	0.00489655	0.00151724	0.00882759	0.0328966	0.0144828	0.0128966	0.00255172	NA	NA	0.0237931	NA	NA	NA	NA	NA	NA	NA	0.00537931	0.0141379	NA	NA	NA	NA	1573405	145082	1106926	1429	79195
chr18	74192646	74207146	ENST00000443185	-	ENSG00000101493	ZNF516	protein_coding	1450	0.470207	0.000275862	0.00172414	0.0022069	0.0255172	0.0371724	0.0168276	0.00413793	0.00503448	0.0382759	0.0302759	0.0257241	NA	NA	NA	NA	NA	NA	NA	0.00924138	0.0335862	NA	NA	NA	NA	1245865	299541	1165245	328969	137502
chr19	34663352	34677852	ENST00000433627	+	ENSG00000257103	LSM14A	protein_coding	1450	0.40669	6.89655e-05	0.00158621	0.00696552	0.00510345	0.0395172	0.00468966	0.0114483	0.00062069	0.014	0.262345	0.00772414	0.0233103	NA	NA	NA	NA	NA	NA	0.00186207	0.198828	NA	NA	NA	NA	42103	356686	380993	650553	57068
chr19	8056029	8070529	ENST00000407627	-	ENSG00000066044	ELAVL1	protein_coding	1450	0.495586	0.000206897	0.00337931	0.00496552	0.00848276	0.0395172	0.0082069	0.00951724	0.00062069	0.0436552	0.168345	0.0162069	NA	NA	NA	NA	NA	NA	NA	0.00310345	0.313586	NA	NA	NA	NA	21821	296481	42393	315854	47071
chr19	9435021	9449521	ENST00000541595	+	ENSG00000188629	ZNF177	protein_coding	1450	0.408	0.000275862	0.00172414	0.00234483	0.00137931	0.045931	0.0124138	0.00848276	NA	0.041931	0.245034	0.00137931	0.0778621	NA	NA	NA	NA	NA	NA	0.00248276	0.278621	NA	NA	NA	NA	257136	160930	48249	19226	58270
chr20	36661948	36676448	ENST00000373433	+	ENSG00000101413	RPRD1B	protein_coding	1450	0.418345	0.000137931	NA	NA	NA	0.014069	0.00896552	0.00827586	0.000689655	0.036	0.129448	NA	0.0364138	NA	NA	NA	NA	NA	NA	0.00317241	0.173655	NA	NA	NA	NA	373348	161428	347290	115	58820
chr20	55043647	55058147	ENST00000023939	+	ENSG00000022277	C20orf43	protein_coding	1450	0.41469	0.000551724	0.00524138	0.00151724	NA	0.0427586	NA	0.00827586	NA	0.218207	0.0758621	0.00324138	0.0507586	NA	NA	NA	NA	NA	NA	0.00455172	0.232828	0.00731034	NA	NA	NA	120710	9251	1139804	76296	50296
chr2	114499900	114514400	ENST00000245680	-	ENSG00000115084	SLC35F5	protein_coding	1450	0.395931	0.000482759	NA	0.00882759	0.00434483	0.035931	0.0196552	0.00731034	0.00131034	0.00834483	0.143379	0.00737931	NA	NA	NA	NA	NA	NA	NA	0.00517241	0.291103	NA	NA	NA	NA	880044	4158653	449820	133136	44031
chr21	47878812	47893312	ENST00000400274	+	ENSG00000160305	DIP2A	protein_coding	1450	0.445586	0.000344828	0.00331034	0.008	0.0190345	0.0431724	0.00275862	0.0105517	NA	0.0984138	0.057931	NA	0.0655172	NA	NA	NA	NA	NA	NA	0.00441379	0.31869	NA	NA	NA	NA	NA	NA	NA	NA	110809
chr2	175697793	175712293	ENST00000444394	-	ENSG00000128656	CHN1	protein_coding	1450	0.368138	0.000206897	0.00648276	NA	NA	0.0329655	0.0124138	0.00875862	NA	0.0148276	0.221793	0.00531034	0.0284828	NA	NA	NA	NA	NA	NA	NA	0.136207	NA	NA	NA	NA	124666	226712	377990	1245238	45844
chr2	180115017	180129517	ENST00000428443	-	ENSG00000187231	SESTD1	protein_coding	1450	0.399655	0.000137931	NA	NA	NA	0.0266897	0.0111034	0.00593103	0.00062069	0.185448	0.165448	0.00848276	0.0528276	NA	NA	NA	NA	NA	NA	0.00537931	0.137793	NA	NA	NA	NA	746162	680086	548508	1715594	163034
chr2	209130991	209145491	ENST00000443896	+	ENSG00000115020	PIKFYVE	protein_coding	1450	0.401586	0.000482759	0.00351724	NA	NA	0.0211724	0.0166897	0.00241379	NA	NA	0.0614483	0.0155862	0.0413103	NA	NA	NA	NA	NA	NA	NA	0.129379	NA	NA	0.00186207	NA	1696360	510095	1714443	11185	59840
chr2	26568982	26583482	ENST00000260585	+	ENSG00000138018	EPT1	protein_coding	1450	0.42669	0.000206897	0.00324138	0.002	0.00565517	0.0373793	NA	0.0113103	NA	0.0666897	0.191517	0.00193103	0.0417241	NA	NA	NA	NA	NA	NA	NA	0.275103	NA	NA	NA	NA	378159	55649	684359	101388	49777
chr2	27193480	27207980	ENST00000233121	+	ENSG00000084764	MAPRE3	protein_coding	1450	0.45331	0.000137931	NA	0.00351724	0.016069	0.0227586	0.00510345	0.00227586	NA	0.024	0.080069	0.00303448	NA	NA	NA	NA	NA	NA	NA	0.00841379	0.0798621	NA	NA	NA	NA	22293	176025	59861	725886	56584
chr3	132136370	132150870	ENST00000260818	+	ENSG00000138246	DNAJC13	protein_coding	1450	0.377517	6.89655e-05	0.00344828	NA	NA	0.0286207	0.0017931	0.00351724	0.00062069	0.0708966	0.134621	0.00462069	NA	NA	NA	NA	NA	NA	NA	0.00572414	0.129103	NA	NA	NA	NA	196919	1028696	100611	914510	121506
chr3	16541033	16555533	ENST00000431547	-	ENSG00000131378	RFTN1	protein_coding	1450	0.461034	0.000275862	0.00531034	NA	0.00462069	0.0283448	0.00827586	0.00786207	0.00062069	0.0742759	0.173517	0.00441379	0.0805517	NA	NA	NA	NA	NA	NA	0.020069	0.0577241	NA	NA	NA	NA	209037	643120	167939	370918	104553
chr3	197449273	197463773	ENST00000389665	-	ENSG00000145016	KIAA0226	protein_coding	1450	0.459517	6.89655e-05	0.00158621	0.0166897	0.00634483	0.0311724	0.00682759	0.00841379	NA	NA	0.0732414	NA	0.0482069	0.0597241	NA	NA	NA	NA	NA	0.0037931	0.339793	NA	NA	NA	NA	NA	NA	NA	NA	60062
chr3	37903451	37917951	ENST00000443503	+	ENSG00000144677	CTDSPL	protein_coding	1450	0.401724	6.89655e-05	0.00331034	NA	0.00441379	0.0271034	0.011931	0.00248276	0.00372414	NA	0.464207	0.014069	0.0272414	NA	NA	NA	NA	NA	NA	0.00806897	0.0804828	NA	NA	NA	NA	67443	426463	105535	685600	122509
chr3	40566474	40580974	ENST00000490457	+	ENSG00000172888	ZNF621	protein_coding	1450	0.430966	0.000551724	0.00468966	NA	NA	0.031931	0.01	0.00482759	NA	0.160207	0.158	0.0143448	0.0214483	NA	NA	NA	NA	NA	NA	0.00393103	0.177517	NA	NA	NA	NA	634467	7275	681615	1371372	49702
chr3	67690538	67705038	ENST00000307227	-	ENSG00000172340	SUCLG2	protein_coding	1450	0.419034	6.89655e-05	0.00565517	0.00682759	0.00172414	0.0327586	0.0156552	0.00524138	0.00062069	0.0762759	0.130483	0.00558621	0.0361379	NA	NA	NA	NA	NA	NA	0.00675862	0.142552	NA	NA	NA	NA	1114193	1319329	603406	1429051	279895
chr4	142040116	142054616	ENST00000306799	-	ENSG00000170153	RNF150	protein_coding	1450	0.421172	6.89655e-05	0.00393103	0.00551724	0.0110345	0.0498621	0.00503448	0.00358621	NA	0.0257241	0.17731	0.0165517	0.0350345	NA	NA	NA	NA	NA	NA	0.00310345	0.0562069	NA	NA	NA	NA	337145	894565	539692	87432	267891
chr4	153701089	153715589	ENST00000451320	+	ENSG00000164144	ARFIP1	protein_coding	1450	0.381379	6.89655e-05	0.00310345	NA	NA	0.044	0.00468966	0.00510345	NA	0.0984828	0.190138	NA	NA	NA	NA	NA	NA	NA	NA	0.00696552	0.167586	NA	NA	NA	NA	123045	240674	1715059	99772	132420
chr4	157878046	157892546	ENST00000502773	-	ENSG00000145431	PDGFC	protein_coding	1450	0.386483	0.000137931	0.00193103	0.00310345	NA	0.017931	0.0107586	0.00675862	0.00062069	0.0202759	0.0514483	0.00344828	0.0177931	NA	NA	NA	NA	NA	NA	0.0128966	0.0347586	NA	NA	NA	NA	977498	1695284	3294684	1700730	210940
chr4	24571673	24586173	ENST00000336812	-	ENSG00000109606	DHX15	protein_coding	1450	0.405931	0.000344828	0.00262069	0.00165517	0.00331034	0.0323448	0.00393103	0.00806897	NA	0.0151034	0.0305517	NA	NA	NA	NA	NA	NA	NA	NA	0.0017931	0.207862	NA	NA	NA	NA	24260	221565	3816193	210911	57075
chr4	39965076	39979576	ENST00000503396	-	ENSG00000121892	PDS5A	protein_coding	1450	0.455862	0.000344828	0.0017931	0.00131034	0.004	0.0309655	0.00758621	0.0132414	0.00131034	0.00537931	0.0748276	0.00351724	0.0344828	NA	NA	NA	NA	NA	NA	0.00344828	0.410345	NA	NA	NA	NA	299095	445695	155166	78947	79942
chr4	48343339	48357839	ENST00000264313	+	ENSG00000109171	SLAIN2	protein_coding	1450	0.399793	6.89655e-05	0.00496552	0.00137931	0.00117241	0.0433793	0.00462069	0.0101379	NA	0.0606207	0.144138	0.00137931	0.0311724	NA	NA	NA	NA	NA	NA	0.0077931	0.116552	NA	NA	NA	NA	449720	304259	116040	426706	84737
chr4	79846048	79860548	ENST00000295462	-	ENSG00000163291	PAQR3	protein_coding	1450	0.384414	0.000344828	0.0042069	0.00172414	NA	0.0293793	0.0113793	0.00427586	NA	0.0463448	0.11931	0.00703448	0.03	NA	NA	NA	NA	NA	NA	0.00524138	0.0628276	NA	NA	NA	NA	1080004	962222	946604	1245875	52241
chr4	99182535	99197035	ENST00000509011	+	ENSG00000138698	RAP1GDS1	protein_coding	1450	0.368897	0.000137931	0.00158621	0.0042069	NA	0.0475862	NA	0.00510345	NA	0.289448	0.228207	0.0077931	0.0250345	NA	NA	NA	NA	NA	NA	0.00351724	0.0285517	NA	NA	NA	NA	694252	3593158	168982	9204212	130696
chr5	115420688	115435188	ENST00000274458	+	ENSG00000145781	COMMD10	protein_coding	1450	0.371103	0.000344828	NA	NA	NA	0.0304138	0.0124138	0.00255172	0.000689655	0.0950345	0.175655	NA	0.0537931	NA	NA	NA	NA	NA	NA	0.00131034	0.0651724	NA	NA	NA	NA	2946395	170910	2711880	243140	208296
chr5	121297656	121312156	ENST00000339397	+	ENSG00000151304	SRFBP1	protein_coding	1450	0.363103	0.000206897	NA	0.00213793	0.00144828	0.0232414	0.00255172	0.002	NA	0.0197241	0.385379	NA	NA	NA	NA	NA	NA	NA	NA	0.00241379	0.0546897	NA	NA	NA	0.0315862	310163	1274692	61233	2973416	66658
chr5	171419377	171433877	ENST00000296933	-	ENSG00000072803	FBXW11	protein_coding	1450	0.41331	0.000206897	0.00165517	NA	0.00144828	0.0462069	0.0144828	0.00524138	NA	0.0255862	0.0185517	0.00924138	0.00627586	NA	NA	NA	NA	NA	NA	0.0123448	0.181448	NA	NA	NA	0.0231724	1986133	35196	509247	634398	145324
chr5	93954052	93968552	ENST00000265140	+	ENSG00000133302	ANKRD32	protein_coding	1450	0.364966	0.000482759	0.00606897	0.00593103	NA	0.0548966	0.0102759	0.00951724	NA	NA	0.0955172	0.0102759	0.0155172	NA	NA	NA	NA	NA	NA	0.00434483	0.176414	NA	NA	NA	NA	896772	1024266	48236	506648	79274
chr6	11218415	11232915	ENST00000379446	-	ENSG00000111859	NEDD9	protein_coding	1450	0.423862	6.89655e-05	0.00158621	0.00213793	0.00165517	0.0354483	0.0122759	0.00655172	0.000827586	0.0233793	0.00786207	0.00144828	NA	NA	NA	NA	NA	NA	NA	0.00234483	0.115379	NA	NA	NA	NA	773118	2046611	53946	779808	49384
chr6	129204342	129218842	ENST00000421865	+	ENSG00000196569	LAMA2	protein_coding	1450	0.341862	6.89655e-05	0.00834483	0.00310345	NA	0.0530345	0.00503448	0.00731034	NA	0.0911724	0.130069	0.011931	NA	NA	NA	NA	NA	NA	NA	0.006	0.0946207	NA	NA	NA	NA	1095385	1594637	653897	362472	633372
chr6	131369962	131384462	ENST00000337057	-	ENSG00000079819	EPB41L2	protein_coding	1450	0.421448	0.000137931	0.00489655	0.00958621	0.00331034	0.0398621	0.0148276	0.0057931	NA	0.00882759	0.0902759	0.00496552	0.1	NA	NA	NA	NA	NA	NA	0.00137931	0.152345	NA	NA	NA	NA	1313092	510643	580252	72363	223975
chr6	132129156	132143656	ENST00000360971	+	ENSG00000197594	ENPP1	protein_coding	1450	0.403586	0.000206897	0.00565517	0.00310345	0.00310345	0.0302069	0.00517241	0.00655172	NA	0.104345	NA	NA	0.0916552	NA	NA	0.0164138	NA	NA	NA	0.0157931	0.170276	NA	NA	NA	NA	966551	524481	100160	179793	87139
chr6	139294898	139309398	ENST00000258062	-	ENSG00000135597	REPS1	protein_coding	1450	0.416621	6.89655e-05	0.00158621	0.00468966	0.00158621	0.0455172	0.00834483	0.00751724	NA	0.0234483	0.204276	NA	NA	NA	NA	NA	NA	NA	NA	0.00151724	0.189586	NA	NA	NA	NA	375730	383998	154942	40420	83391
chr6	139456249	139470749	ENST00000367658	+	ENSG00000112406	HECA	protein_coding	1450	0.433586	0.000137931	NA	0.00151724	0.00227586	0.0292414	0.00344828	0.00648276	NA	0.00841379	0.072	0.0124138	0.0774483	NA	NA	NA	NA	NA	NA	0.00786207	0.18931	NA	NA	NA	NA	2972160	91810	197147	146851	45690
chr7	112565471	112579971	ENST00000297145	-	ENSG00000164603	C7orf60	protein_coding	1450	0.361172	0.000206897	0.00151724	0.00517241	0.00331034	0.0216552	0.021931	0.00434483	0.000689655	0.0331034	0.0642759	0.00406897	0.0311724	NA	NA	NA	NA	NA	NA	0.00558621	0.0610345	NA	NA	NA	NA	109493	176801	409028	1982237	120769
chr7	141250989	141265489	ENST00000355413	+	ENSG00000006530	AGK	protein_coding	1450	0.426207	0.000275862	0.00158621	0.00172414	0.0077931	0.0264828	0.0109655	0.0126207	0.00062069	NA	0.371862	0.00848276	0.0984138	NA	NA	NA	NA	NA	NA	NA	0.150414	NA	NA	NA	NA	147186	844543	65538	536208	104055
chr7	23495586	23510086	ENST00000258729	-	ENSG00000136231	IGF2BP3	protein_coding	1450	0.452345	0.000275862	0.00337931	0.002	0.00634483	0.0310345	0.00544828	0.0102759	0.00062069	NA	0.0517241	0.00351724	0.0326207	NA	NA	NA	NA	NA	NA	NA	0.174828	NA	NA	NA	NA	416316	34314	120906	126911	160258
chr7	28205862	28220362	ENST00000283928	-	ENSG00000153814	JAZF1	protein_coding	1450	0.433448	0.000137931	0.00496552	0.00206897	0.0153103	0.0282069	0.00586207	0.0062069	0.000689655	0.114414	0.0255172	0.0453793	0.00193103	NA	NA	NA	NA	NA	NA	0.0213103	0.0814483	NA	NA	NA	NA	477742	1465175	310976	1847614	350170
chr7	2869458	2883958	ENST00000275364	-	ENSG00000146535	GNA12	protein_coding	1450	0.473793	0.000137931	0.00344828	NA	0.00227586	0.0250345	0.0231034	0.0082069	NA	0.022069	0.210138	0.0214483	0.0232414	NA	NA	NA	NA	NA	NA	NA	0.214207	NA	NA	NA	NA	248566	1954781	88889	1837971	116212
chr7	38217824	38232324	ENST00000009041	+	ENSG00000010270	STARD3NL	protein_coding	1450	0.383931	0.000137931	0.00158621	0.0017931	0.00358621	0.0291724	0.0196552	0.00324138	0.00062069	0.0543448	0.24869	0.00241379	0.02	NA	NA	NA	NA	NA	NA	0.0142759	0.0333793	NA	NA	NA	NA	1348178	1724424	505718	1788090	52448
chr7	90225811	90240311	ENST00000380050	+	ENSG00000058091	CDK14	protein_coding	1450	0.391448	0.000344828	0.00158621	0.00234483	0.00186207	0.038069	0.00413793	0.00675862	0.00124138	0.0202759	0.0241379	0.00855172	0.056	NA	NA	NA	NA	NA	NA	0.00524138	0.115379	0.00744828	NA	NA	NA	72900	180543	1236209	2369503	614094
chr7	94271021	94285521	ENST00000265735	-	ENSG00000127990	SGCE	protein_coding	1450	0.370966	0.000137931	0.00489655	0.00131034	0.00344828	0.0191034	0.0198621	0.00648276	NA	0.0108966	0.124	0.00448276	NA	NA	NA	NA	NA	NA	NA	NA	0.0677241	NA	NA	NA	NA	611831	748652	59193	2460383	70979
chr8	56792372	56806872	ENST00000519728	+	ENSG00000254087	LYN	protein_coding	1450	0.454276	0.000137931	0.00186207	NA	0.0105517	0.0567586	NA	0.00813793	NA	0.0284138	0.0968276	0.0022069	NA	NA	NA	NA	NA	NA	NA	0.0104138	0.269586	NA	NA	NA	NA	291942	54367	148366	106487	130759
chr8	62612655	62627155	ENST00000356457	-	ENSG00000198363	ASPH	protein_coding	1450	0.378966	6.89655e-05	0.00331034	0.00144828	0.00475862	0.0248276	0.0183448	0.00565517	NA	NA	0.270345	0.00565517	NA	NA	NA	NA	NA	NA	NA	0.0135862	0.0701379	NA	NA	NA	NA	2555388	1300483	1050952	1453965	90060
chr8	82740039	82754539	ENST00000345957	-	ENSG00000104497	SNX16	protein_coding	1450	0.38531	0.000344828	NA	NA	NA	0.0472414	0.0170345	0.00606897	NA	0.0210345	0.330621	0.0042069	0.0846897	NA	NA	NA	NA	NA	NA	0.00186207	0.0633793	NA	NA	NA	NA	81000	3371748	1279929	3264783	41346
chr8	95551257	95565757	ENST00000421249	-	ENSG00000164944	KIAA1429	protein_coding	1450	0.400552	0.000206897	0.00317241	0.004	0.00248276	0.0316552	0.00827586	0.0124828	NA	0.0325517	0.106276	0.00193103	0.0603448	NA	NA	NA	NA	NA	NA	0.00531034	0.301034	NA	NA	NA	NA	38414	326695	587461	166345	42796
chr9	127163221	127177721	ENST00000536392	-	ENSG00000136930	PSMB7	protein_coding	1450	0.407034	0.000413793	0.002	0.00234483	0.00372414	0.0251034	0.00537931	0.00544828	0.00062069	0.0362759	0.128828	0.00296552	NA	NA	NA	NA	NA	NA	NA	0.00193103	0.271793	NA	NA	NA	NA	445304	442436	16258	242993	59043
chr9	133454993	133469493	ENST00000319725	+	ENSG00000107164	FUBP3	protein_coding	1450	0.44731	0.000137931	0.00158621	NA	NA	0.0337931	NA	0.00448276	0.000758621	0.0485517	0.0793103	0.00186207	0.00282759	NA	NA	NA	NA	NA	NA	0.00868966	0.322069	NA	NA	NA	NA	74164	78332	282831	112	58746
chr9	99367612	99382112	ENST00000265659	-	ENSG00000081377	CDC14B	protein_coding	1450	0.442621	0.000137931	0.00848276	NA	0.00655172	0.0254483	0.0110345	0.00682759	NA	NA	0.0437241	0.0170345	0.0335862	NA	NA	NA	NA	NA	NA	0.00758621	0.224759	NA	NA	NA	NA	161443	21420	88494	618595	123543
chrX	128674252	128688752	ENST00000357121	+	ENSG00000122126	OCRL	protein_coding	1450	0.40331	0.000344828	0.00158621	0.00503448	0.00551724	0.0301379	0.0253103	0.00565517	0.00124138	0.0122069	0.30731	0.0104138	NA	NA	NA	NA	NA	NA	NA	0.00282759	0.143379	NA	NA	NA	NA	325844	5437747	223011	16792	52286
chrX	46696375	46710875	ENST00000218340	+	ENSG00000102218	RP2	protein_coding	1450	0.402897	6.89655e-05	0.00165517	NA	0.00275862	0.0208966	0.00393103	0.00441379	NA	NA	0.202207	0.00441379	0.0565517	NA	NA	NA	NA	NA	NA	0.0245517	0.245103	NA	NA	NA	NA	35360	238537	265239	77903	45418
chrX	54195188	54209688	ENST00000375180	-	ENSG00000184083	FAM120C	protein_coding	1450	0.419655	0.000206897	0.00393103	NA	0.00337931	0.0282759	0.00413793	0.00875862	0.00062069	0.230483	0.115103	NA	0.0412414	NA	NA	NA	NA	NA	NA	0.0062069	0.192759	NA	NA	NA	NA	98119	262198	1051960	257164	114931
chr10	102672720	102686970	ENST00000238961	+	ENSG00000119906	FAM178A	protein_coding	1425	0.389123	0.000421053	0.0034386	0.00161404	0.00252632	0.0335439	0.00498246	0.00589474	NA	0.0541053	0.00919298	0.00603509	0.024	NA	NA	NA	NA	NA	NA	0.00147368	0.221754	NA	NA	NA	NA	19565	359039	24858	383084	52173
chr10	118487835	118502085	ENST00000369209	-	ENSG00000165868	HSPA12A	protein_coding	1425	0.503789	7.01754e-05	0.00519298	0.00140351	0.00750877	0.0367018	0.004	0.00842105	NA	0.103649	0.0318596	NA	0.0625263	NA	NA	NA	NA	NA	NA	0.00778947	0.209193	NA	NA	NA	NA	2017671	142220	1724646	2365394	71382
chr10	15196442	15210692	ENST00000378165	-	ENSG00000152465	NMT2	protein_coding	1425	0.442877	0.000350877	0.00175439	0.00589474	0.00336842	0.0366316	0.0109474	0.00617544	0.000631579	0.0665263	0.0160702	NA	0.0665965	NA	NA	NA	NA	NA	NA	0.0120702	0.250526	NA	NA	NA	NA	31374	42951	24436	1268274	60789
chr10	70320413	70334663	ENST00000373644	+	ENSG00000138336	TET1	protein_coding	1425	0.457193	0.000140351	NA	0.00484211	0.00835088	0.0518596	0.0220351	0.00919298	NA	NA	0.0204211	0.0131228	NA	NA	NA	NA	NA	NA	NA	0.00161404	0.347088	NA	NA	NA	NA	120557	217460	1511609	33133	133826
chr10	721433	735683	ENST00000423550	-	ENSG00000151240	DIP2C	protein_coding	1425	0.517684	7.01754e-05	0.00336842	0.0219649	0.0722807	0.0268772	NA	0.00568421	0.00210526	NA	0.110807	0.0746667	NA	NA	NA	NA	NA	NA	NA	0.00610526	0.0507368	NA	NA	NA	NA	NA	NA	NA	NA	248872
chr1	109102711	109116961	ENST00000405454	+	ENSG00000162636	FAM102B	protein_coding	1425	0.400491	7.01754e-05	NA	0.00210526	NA	0.0358596	NA	0.00603509	0.000631579	0.0145965	0.305965	0.00849123	0.0532632	NA	NA	NA	NA	NA	NA	0.00757895	0.138316	NA	NA	NA	NA	92220	1500795	329418	359737	84811
chr1	109289310	109303560	ENST00000370008	+	ENSG00000116266	STXBP3	protein_coding	1425	0.344702	0.000491228	0.00168421	0.00336842	0.00421053	0.042807	0.0107368	0.00687719	NA	0.0465965	0.0725614	0.00940351	0.0576842	NA	NA	NA	NA	NA	NA	0.00308772	0.131158	NA	NA	NA	NA	90292	44888	142819	546336	62838
chr11	118647595	118661845	ENST00000264018	-	ENSG00000110367	DDX6	protein_coding	1425	0.430246	0.000350877	0.00161404	0.00561404	0.00287719	0.042807	0.00287719	0.0126316	NA	0.0301754	0.0933333	0.00659649	NA	NA	NA	NA	NA	NA	NA	NA	0.389053	NA	NA	NA	NA	185054	105005	93097	207006	41811
chr11	34937376	34951626	ENST00000533550	+	ENSG00000110435	PDHX	protein_coding	1425	0.38814	0.000280702	NA	0.00378947	0.00147368	0.0454737	0.013193	0.00666667	0.000631579	0.050807	0.0538246	0.00673684	0.0628772	NA	NA	NA	NA	NA	NA	0.00442105	0.0988772	NA	NA	NA	NA	183040	443769	295375	557821	44682
chr11	35684353	35698603	ENST00000299413	+	ENSG00000166326	TRIM44	protein_coding	1425	0.399649	7.01754e-05	NA	NA	NA	0.018807	0.0359298	0.00617544	NA	0.0242807	0.314035	0.0209123	0.0330526	NA	NA	NA	NA	NA	NA	0.0074386	0.152211	NA	NA	NA	NA	241258	41932	569488	137177	145422
chr1	153881201	153895451	ENST00000368655	-	ENSG00000143614	GATAD2B	protein_coding	1425	0.451088	7.01754e-05	0.0034386	NA	0.00449123	0.0497544	0.00252632	0.00989474	NA	0.0257544	0.0250526	0.010386	NA	NA	NA	NA	NA	NA	NA	0.0082807	0.392772	NA	NA	NA	NA	211972	6525	102818	44945	118250
chr1	16664699	16678949	ENST00000375592	-	ENSG00000037637	FBXO42	protein_coding	1425	0.449684	7.01754e-05	0.00161404	0.00161404	NA	0.0241404	0.0127018	0.0131228	0.000631579	NA	0.0528421	NA	0.0442807	NA	NA	NA	NA	NA	NA	0.000350877	0.514877	NA	NA	NA	NA	75290	114981	371999	14633	105615
chr11	67967045	67981295	ENST00000405515	-	ENSG00000110066	SUV420H1	protein_coding	1425	0.467509	0.000210526	0.00175439	0.00336842	0.00989474	0.0376842	0.025614	0.0125614	0.00077193	NA	0.0922807	0.0230877	0.0310877	NA	NA	NA	NA	NA	NA	NA	0.261333	NA	NA	NA	NA	52437	47507	122929	246890	48113
chr11	73019334	73033584	ENST00000263674	+	ENSG00000110237	ARHGEF17	protein_coding	1425	0.576632	0.000210526	NA	0.00140351	0.014386	0.0424561	0.00315789	0.00519298	NA	NA	0.0717895	NA	0.0332632	NA	NA	NA	NA	NA	NA	NA	0.183509	NA	NA	NA	NA	28070	478654	57693	166191	60802
chr11	73457932	73472182	ENST00000310653	-	ENSG00000175582	RAB6A	protein_coding	1425	0.44007	0.000280702	0.00175439	0.00364912	0.00554386	0.0375439	0.00961404	0.00638596	NA	0.036	0.210737	0.0174035	NA	NA	NA	NA	NA	NA	NA	0.00421053	0.389193	NA	NA	NA	NA	122954	111530	323663	26734	85244
chr12	102513956	102528206	ENST00000327680	+	ENSG00000185480	PARPBP	protein_coding	1425	0.376491	0.000210526	0.00477193	NA	0.00385965	0.0214737	0.0140351	0.00484211	NA	0.0429474	0.38	NA	0.00849123	NA	NA	NA	NA	NA	NA	NA	0.215789	NA	NA	NA	NA	1770232	196555	1612124	1595	77342
chr12	132195634	132209884	ENST00000261674	+	ENSG00000061936	SFSWAP	protein_coding	1425	0.413544	0.000210526	NA	0.00498246	0.00182456	0.0305965	0.00442105	0.00357895	0.00147368	0.0232982	0.0074386	0.00947368	0.0285614	NA	NA	NA	NA	NA	NA	NA	0.101965	NA	NA	NA	NA	77306	834808	385505	871823	88648
chr1	218458629	218472879	ENST00000366932	+	ENSG00000067533	RRP15	protein_coding	1425	0.393193	7.01754e-05	0.00161404	0.00154386	NA	0.0471579	0.00778947	0.00505263	0.000701754	0.0848421	0.0855439	NA	0.0575439	NA	NA	NA	NA	NA	NA	NA	0.263158	NA	NA	NA	NA	20046	2663480	1643312	654220	52696
chr1	222988406	223002656	ENST00000495684	+	ENSG00000154309	DISP1	protein_coding	1425	0.380912	0.000280702	0.00175439	NA	0.00308772	0.0332632	0.0116491	0.00842105	0.00126316	0.0107368	0.0787368	0.0127719	0.0831579	NA	NA	NA	NA	NA	NA	0.004	0.150526	NA	NA	NA	NA	860888	64404	939188	102542	179836
chr1	229629853	229644103	ENST00000537506	-	ENSG00000069248	NUP133	protein_coding	1425	0.386597	0.000631579	NA	NA	NA	0.0538246	0.00315789	0.00785965	0.000631579	0.0675088	0.0604912	NA	0.00589474	NA	NA	NA	NA	NA	NA	0.00470175	0.235298	NA	NA	NA	NA	125415	8225	162853	117877	66460
chr12	46123448	46137698	ENST00000334344	+	ENSG00000189079	ARID2	protein_coding	1425	0.378456	0.000210526	NA	0.00624561	0.00884211	0.0459649	0.00996491	0.00926316	0.00077193	0.0364211	0.175088	0.018386	NA	NA	NA	NA	NA	NA	NA	0.00968421	0.151298	NA	NA	NA	NA	1446603	289261	149465	1744	178375
chr12	62860597	62874847	ENST00000393630	+	ENSG00000061987	2013-12-02	protein_coding	1425	0.405474	0.000140351	0.00336842	0.00189474	NA	0.0233684	NA	0.0121404	0.000631579	0.0247018	0.103439	NA	NA	NA	NA	NA	NA	NA	NA	0.00168421	0.280842	NA	NA	NA	NA	96868	57096	94933	3546335	130766
chr12	70636774	70651024	ENST00000552231	+	ENSG00000111596	CNOT2	protein_coding	1425	0.374737	0.000210526	0.00336842	0.00189474	NA	0.0321404	NA	0.00884211	NA	0.0558596	0.0781053	0.0105263	NA	NA	NA	NA	NA	NA	NA	0.00140351	0.114175	NA	NA	NA	NA	1380902	641417	233857	1910613	95511
chr12	76464563	76478813	ENST00000261182	-	ENSG00000187109	NAP1L1	protein_coding	1425	0.394035	0.000210526	0.00168421	0.00491228	0.00575439	0.0368421	0.0241404	0.00575439	NA	0.0918596	0.209825	0.00392982	0.0283509	NA	NA	NA	NA	NA	NA	0.00301754	0.104912	NA	NA	NA	NA	13257	259452	543097	679040	40143
chr1	28099694	28113944	ENST00000373943	+	ENSG00000117758	STX12	protein_coding	1425	0.430456	0.000140351	0.00168421	0.00133333	0.00414035	0.0354386	NA	0.00442105	0.000421053	NA	0.0891228	NA	NA	NA	NA	NA	NA	NA	NA	0.00154386	0.417123	NA	NA	NA	NA	17557	10271	78354	100970	51269
chr1	28400957	28415207	ENST00000373871	-	ENSG00000158161	EYA3	protein_coding	1425	0.382737	7.01754e-05	0.00245614	NA	NA	0.0621754	NA	0.010386	NA	0.0164912	0.0837193	0.00814035	0.000210526	NA	NA	NA	NA	NA	NA	0.00624561	0.246105	NA	NA	NA	NA	133971	111582	80603	147394	118352
chr13	100741269	100755519	ENST00000376279	+	ENSG00000175198	PCCA	protein_coding	1425	0.429404	0.000140351	0.00329825	0.0037193	0.00308772	0.0246316	0.0118596	0.00807018	NA	0.0741053	0.122807	0.00526316	0.0466667	NA	NA	NA	NA	NA	NA	0.00322807	0.304842	NA	NA	NA	NA	1323696	445866	401148	1002609	441417
chr13	26828276	26842526	ENST00000381527	+	ENSG00000132964	CDK8	protein_coding	1425	0.393193	7.01754e-05	0.00168421	0.00161404	0.00645614	0.0448421	NA	0.00378947	0.00140351	0.0240702	0.183579	0.00161404	0.0210526	NA	NA	NA	NA	NA	NA	0.0112982	0.106175	NA	NA	NA	NA	263563	911715	772010	31768	151099
chr13	45694650	45708900	ENST00000340473	+	ENSG00000188342	GTF2F2	protein_coding	1425	0.446456	0.000140351	0.0034386	0.00182456	NA	0.0343158	0.00814035	0.0085614	NA	NA	0.174667	0.00140351	0.140491	NA	NA	0.0167018	NA	NA	NA	NA	0.349404	NA	NA	NA	NA	180829	92246	176653	131037	163587
chr14	32963477	32977727	ENST00000554410	+	ENSG00000151320	AKAP6	protein_coding	1425	0.352281	0.000140351	0.00175439	NA	0.00133333	0.0425965	0.0230175	0.00680702	NA	0.0620351	0.218807	0.00785965	0.0437895	NA	NA	NA	NA	NA	NA	0.00680702	0.0708772	NA	NA	NA	NA	2448626	334543	1898666	1036797	51184
chr1	46138052	46152302	ENST00000355105	-	ENSG00000159592	GPBP1L1	protein_coding	1425	0.404912	0.000140351	0.00336842	NA	0.00161404	0.0345965	0.018807	0.0115789	NA	0.0469474	0.106175	NA	0.0112281	NA	NA	NA	NA	NA	NA	NA	0.309404	NA	NA	NA	NA	22571	7695	27724	1544	59324
chr14	67707826	67722076	ENST00000261681	+	ENSG00000072415	MPP5	protein_coding	1425	0.402877	0.000210526	0.00161404	0.00392982	0.00147368	0.0305263	0.0137544	0.0105965	0.000701754	0.0177544	0.127789	0.0042807	0.0903158	NA	NA	NA	NA	NA	NA	0.00540351	0.293053	NA	NA	NA	NA	79207	59301	56754	1828491	94710
chr14	70078313	70092563	ENST00000342745	+	ENSG00000100647	KIAA0247	protein_coding	1425	0.442386	0.000140351	0.00168421	0.00596491	0.00175439	0.0341754	0.00133333	0.00631579	0.00077193	0.0973333	0.0545263	0.00322807	0.00624561	NA	NA	NA	NA	NA	NA	NA	0.142596	NA	NA	NA	NA	115515	149206	673484	213292	103546
chr14	76618259	76632509	ENST00000554375	+	ENSG00000089916	C14orf118	protein_coding	1425	0.410456	0.000280702	0.00231579	0.00189474	NA	0.0383158	0.0232281	0.00252632	NA	0.0305263	0.103158	0.00589474	0.0382456	NA	NA	NA	NA	NA	NA	0.00259649	0.107228	NA	NA	NA	NA	569975	68167	595326	490721	50091
chr14	77564654	77578904	ENST00000557752	+	ENSG00000259164	RP11-463C8.4	protein_coding	1425	0.426035	0.000421053	0.00357895	0.00175439	0.00407018	0.0233684	0.00336842	0.00652632	NA	0.0304561	0.161474	0.0146667	0.0323509	NA	NA	NA	NA	NA	NA	0.00217544	0.145754	NA	NA	NA	0.0178246	182575	315291	136644	69620	127151
chr1	51970750	51985000	ENST00000371733	-	ENSG00000085832	EPS15	protein_coding	1425	0.385965	0.000140351	NA	0.00477193	0.00505263	0.0264561	0.00414035	0.00554386	NA	0.0141754	0.121684	0.0251228	NA	NA	NA	NA	NA	NA	NA	0.00470175	0.214456	NA	NA	NA	NA	519064	269865	205881	97545	165065
chr15	30100456	30114706	ENST00000346128	-	ENSG00000104067	TJP1	protein_coding	1425	0.398456	0.000210526	0.00182456	0.00526316	0.0113684	0.0251228	0.0166316	0.00835088	NA	0.0389474	0.270667	0.00982456	NA	NA	NA	NA	NA	NA	NA	0.00385965	0.104491	NA	NA	NA	NA	512686	1116437	4551150	804172	123135
chr15	41394302	41408552	ENST00000361937	-	ENSG00000128908	INO80	protein_coding	1425	0.457333	0.000140351	NA	0.00161404	0.00547368	0.038386	0.00968421	0.0148772	0.000631579	0.017193	0.0948772	0.00582456	NA	NA	NA	NA	NA	NA	NA	0.0034386	0.525404	NA	NA	NA	NA	268876	192913	119835	114884	137474
chr15	57210821	57225071	ENST00000438423	+	ENSG00000140262	TCF12	protein_coding	1425	0.386667	0.000280702	0.00329825	0.00414035	0.00175439	0.0510877	0.0117193	0.00505263	NA	0.0333333	0.0449825	0.0185965	NA	NA	NA	NA	NA	NA	NA	0.00470175	0.105193	NA	NA	NA	NA	341741	1562975	1637688	185034	369891
chr15	68346517	68360767	ENST00000249636	+	ENSG00000033800	PIAS1	protein_coding	1425	0.394737	0.000350877	0.00168421	0.00561404	0.00336842	0.0411228	0.0129123	0.00484211	NA	0.0967719	0.0960702	0.0077193	NA	NA	NA	NA	NA	NA	NA	0.00666667	0.192491	NA	NA	NA	NA	183623	247062	96525	799443	133885
chr16	50186829	50201079	ENST00000436909	+	ENSG00000121274	PAPD5	protein_coding	1425	0.449965	0.000140351	0.00329825	0.004	0.00175439	0.033614	NA	0.0131228	NA	0.0037193	0.130175	0.017193	0.00315789	NA	NA	NA	NA	NA	NA	0.033614	0.280912	NA	NA	NA	NA	94993	47454	126099	1542709	78913
chr1	65417937	65432187	ENST00000342505	-	ENSG00000162434	JAK1	protein_coding	1425	0.425404	7.01754e-05	0.00182456	NA	0.00175439	0.0385263	NA	0.00519298	0.00147368	0.0696842	0.0848421	0.00385965	NA	NA	NA	NA	NA	NA	NA	NA	0.16386	NA	NA	NA	NA	1403243	91929	93273	298242	133275
chr17	11924141	11938391	ENST00000353533	+	ENSG00000065559	MAP2K4	protein_coding	1425	0.393474	0.000280702	0.00364912	0.00203509	0.00378947	0.0430877	0.008	0.00561404	NA	NA	0.0378246	0.0129825	NA	NA	NA	NA	NA	NA	NA	0.00442105	0.11586	NA	NA	NA	NA	21074	1309266	930787	23452	122999
chr17	60128393	60142643	ENST00000397786	-	ENSG00000108510	MED13	protein_coding	1425	0.37614	0.000210526	NA	0.00182456	0.0034386	0.0283509	0.00484211	0.00561404	NA	NA	0.0178246	0.00449123	0.0215439	NA	NA	NA	NA	NA	NA	0.00687719	0.176982	NA	NA	NA	NA	97266	1367021	612002	358602	122677
chr18	12363001	12377251	ENST00000269143	-	ENSG00000141385	AFG3L2	protein_coding	1425	0.466246	0.000421053	0.00189474	0.008	0.00175439	0.0317895	0.00898246	0.0101754	NA	0.0118596	0.103719	NA	0.0305263	NA	NA	NA	NA	NA	NA	NA	0.313614	NA	NA	NA	NA	428455	69259	10683	30643	48308
chr18	12991361	13005611	ENST00000506447	+	ENSG00000101639	CEP192	protein_coding	1425	0.429684	0.000280702	0.00329825	0.00392982	0.00154386	0.0394386	0.0138947	0.00554386	NA	0.0253333	0.348702	0.00189474	0.0354386	NA	NA	NA	NA	NA	NA	0.00182456	0.158035	NA	NA	NA	NA	695342	3825	631984	107027	133674
chr1	85142190	85156440	ENST00000476905	-	ENSG00000117155	SSX2IP	protein_coding	1425	0.396421	0.000210526	0.00364912	0.00512281	0.00147368	0.0208421	0.0127018	0.00322807	NA	0.0107368	0.0842105	0.00673684	0.0373333	NA	NA	NA	NA	NA	NA	NA	0.161965	NA	NA	NA	NA	76277	122645	152407	585600	43416
chr19	30433158	30447408	ENST00000392271	+	ENSG00000105176	URI1	protein_coding	1425	0.414807	0.000140351	0.00175439	0.00133333	0.00273684	0.0301754	0.0207719	0.00582456	NA	0.102456	0.199368	0.00624561	NA	0.0979649	NA	NA	NA	NA	NA	0.00554386	0.137754	NA	NA	NA	NA	2363355	117943	1292692	226706	73453
chr1	93412807	93427057	ENST00000370310	-	ENSG00000154511	FAM69A	protein_coding	1425	0.41193	7.01754e-05	0.00350877	NA	0.00645614	0.0366316	0.00757895	0.00540351	NA	0.0107368	0.283509	0.00238596	0.0546667	NA	NA	NA	NA	NA	NA	0.0117193	0.231228	NA	NA	NA	NA	129096	188241	79576	117734	119333
chr20	36322408	36336658	ENST00000361383	+	ENSG00000132792	CTNNBL1	protein_coding	1425	0.414456	0.000140351	0.00161404	0.00196491	NA	0.0220351	NA	0.00652632	0.000631579	0.212632	0.054807	0.00147368	NA	NA	NA	NA	NA	NA	NA	0.00168421	0.262316	NA	NA	NA	NA	299539	288587	249014	166075	178123
chr20	49126891	49141141	ENST00000371621	+	ENSG00000196396	PTPN1	protein_coding	1425	0.412842	7.01754e-05	0.00245614	NA	0.00161404	0.0237895	0.00561404	0.00905263	NA	0.0220351	0.0546667	0.00407018	NA	NA	NA	NA	NA	NA	NA	0.00245614	0.103439	NA	NA	NA	NA	35431	317664	35755	356556	74408
chr2	10443015	10457265	ENST00000423674	+	ENSG00000115756	HPCAL1	protein_coding	1425	0.494667	0.000140351	NA	0.00407018	0.0136842	0.0232281	NA	0.0125614	0.000631579	0.0112982	0.0598596	0.00596491	NA	NA	NA	NA	NA	NA	NA	0.0195789	0.128982	NA	NA	NA	NA	812524	92073	97492	222477	116958
chr2	134877554	134891804	ENST00000468758	+	ENSG00000152127	MGAT5	protein_coding	1425	0.489404	0.000140351	0.0034386	0.00891228	0.0120702	0.0434386	0.00821053	0.00715789	0.00133333	0.0280702	0.0191579	0.012	0.214877	NA	NA	NA	NA	NA	NA	0.00196491	0.0877895	NA	NA	NA	NA	94275	1473385	706648	2627490	134661
chr21	35014706	35028956	ENST00000399353	+	ENSG00000205726	ITSN1	protein_coding	1425	0.433544	0.000140351	0.00175439	NA	NA	0.0329123	0.00947368	0.00540351	NA	0.0474386	0.0875088	0.0145263	0.0157895	NA	NA	NA	NA	NA	NA	0.0045614	0.218807	NA	NA	NA	NA	391116	64894	221050	546	194616
chr2	136289025	136303275	ENST00000483021	+	ENSG00000048991	R3HDM1	protein_coding	1425	0.394596	7.01754e-05	NA	NA	0.00161404	0.0340351	0.00308772	0.00435088	NA	0.284561	0.0647719	0.00568421	0.0112982	NA	NA	NA	NA	NA	NA	0.010807	0.228772	NA	NA	NA	NA	93941	360746	268170	219	71215
chr2	148764897	148779147	ENST00000264169	-	ENSG00000115947	ORC4	protein_coding	1425	0.380842	0.000280702	0.00175439	0.0101053	0.0045614	0.0230175	0.0404211	0.00694737	0.000701754	0.144702	0.47593	0.00491228	0.0352281	NA	NA	NA	NA	NA	NA	0.00505263	0.0939649	NA	NA	NA	NA	3461189	1646999	50754	623412	87415
chr2	191513796	191528046	ENST00000409581	+	ENSG00000138386	NAB1	protein_coding	1425	0.397474	0.000350877	0.00350877	0.00519298	0.00105263	0.0442807	0.00610526	0.00926316	NA	0.0354386	0.0659649	0.00547368	NA	NA	NA	NA	NA	NA	NA	0.00442105	0.0344561	NA	NA	NA	NA	191750	146755	279965	114328	41849
chr22	22207720	22221970	ENST00000398822	-	ENSG00000100030	MAPK1	protein_coding	1425	0.435439	7.01754e-05	0.00161404	0.00154386	NA	0.037193	0.00926316	0.0117193	0.00077193	0.0442105	0.116211	0.0229474	NA	NA	NA	NA	0.0204211	NA	NA	0.0037193	0.23593	NA	NA	NA	NA	197630	51821	129768	430492	98641
chr2	55263714	55277964	ENST00000404909	-	ENSG00000115310	RTN4	protein_coding	1425	0.397825	0.000350877	NA	NA	NA	0.0484912	0.0101053	0.00933333	0.000631579	0.0561404	0.289614	0.0136842	0.0264561	NA	NA	NA	NA	NA	NA	0.00470175	0.118386	NA	NA	NA	NA	1039987	121722	339381	181074	78639
chr2	86667924	86682174	ENST00000409556	+	ENSG00000115548	KDM3A	protein_coding	1425	0.410947	0.000561404	0.00498246	0.00189474	0.00575439	0.0483509	0.00687719	0.00498246	0.00147368	0.0964912	0.0356491	0.0100351	NA	NA	NA	NA	NA	NA	NA	0.00526316	0.0974737	NA	NA	NA	NA	239489	227447	22628	245031	51915
chr3	120155850	120170100	ENST00000295633	-	ENSG00000163430	FSTL1	protein_coding	1425	0.443719	0.000280702	NA	0.00189474	0.00301754	0.0402105	0.00336842	0.00722807	0.00259649	0.0166316	0.0541053	0.00638596	NA	NA	NA	NA	NA	NA	NA	0.010386	0.120702	NA	NA	NA	NA	61914	235427	886975	145027	58960
chr3	195149557	195163807	ENST00000326793	-	ENSG00000114331	ACAP2	protein_coding	1425	0.408772	0.000210526	0.00175439	0.00568421	0.00378947	0.0258246	0.00526316	0.0122105	0.00147368	0.0231579	0.324702	0.00147368	NA	NA	NA	NA	NA	NA	NA	NA	0.28807	NA	NA	NA	NA	131912	77413	714041	221102	168342
chr3	45730678	45744928	ENST00000455997	+	ENSG00000211456	SACM1L	protein_coding	1425	0.405614	7.01754e-05	0.00168421	0.00470175	NA	0.0456842	0.0174035	0.00821053	0.000701754	0.0515088	0.101333	0.0105263	NA	NA	NA	NA	NA	NA	NA	0.00203509	0.227088	NA	NA	NA	NA	1250494	7923	94767	462864	56221
chr4	108745719	108759969	ENST00000506462	+	ENSG00000164023	SGMS2	protein_coding	1425	0.413614	0.000140351	0.00238596	0.00315789	0.00533333	0.0287719	0.00217544	0.00350877	NA	0.0430877	0.179158	0.00463158	0.0352982	NA	NA	NA	NA	NA	NA	0.00603509	0.132281	NA	NA	NA	NA	66997	1475338	182981	104300	70984
chr4	175191165	175205415	ENST00000393674	-	ENSG00000164117	FBXO8	protein_coding	1425	0.353965	0.000140351	0.00336842	NA	NA	0.0303158	0.0164211	0.00512281	NA	0.0223158	0.278456	0.008	0.00736842	NA	NA	NA	NA	NA	NA	NA	0.131298	NA	NA	NA	NA	714037	2399275	866732	2035674	47606
chr4	85873294	85887544	ENST00000322366	-	ENSG00000163625	WDFY3	protein_coding	1425	0.385544	0.000140351	0.00161404	NA	0.00526316	0.0294035	0.0210526	0.0138246	NA	0.0237193	0.204772	0.00835088	NA	NA	NA	NA	NA	NA	NA	NA	0.131228	NA	NA	NA	NA	1441254	1857076	1320518	508739	296840
chr4	86699859	86714109	ENST00000395183	+	ENSG00000138639	ARHGAP24	protein_coding	1425	0.365123	7.01754e-05	0.00322807	NA	NA	0.0725614	0.0113684	0.00645614	NA	0.0585965	0.016	0.00154386	0.0728421	NA	NA	NA	NA	NA	NA	0.00821053	0.0583158	NA	NA	NA	NA	775608	56173	1004761	812315	222517
chr5	102089685	102103935	ENST00000505654	+	ENSG00000145730	PAM	protein_coding	1425	0.422526	0.000140351	NA	NA	NA	0.0249825	0.00982456	0.00414035	0.00077193	0.0835088	0.123018	0.00652632	0.0604211	NA	NA	NA	NA	NA	NA	0.00694737	0.0953684	NA	NA	NA	NA	71841	2167245	292018	3827447	112301
chr5	107703549	107717799	ENST00000542267	-	ENSG00000145743	FBXL17	protein_coding	1425	0.402947	0.000140351	0.00603509	0.00364912	NA	0.0337544	0.0122807	0.00764912	NA	0.0550175	0.324632	0.00933333	0.0504561	NA	NA	NA	NA	NA	NA	0.0214035	0.106526	NA	NA	NA	NA	4779309	952610	5063438	365723	523053
chr5	112849380	112863630	ENST00000161863	+	ENSG00000047188	YTHDC2	protein_coding	1425	0.360632	0.000350877	0.0034386	0.00168421	NA	0.0303158	0.0108772	0.00547368	NA	0.0367018	0.0742456	0.00982456	0.0425263	NA	NA	NA	NA	NA	NA	0.00814035	0.159088	NA	NA	NA	NA	808635	491488	1657146	591349	81601
chr5	134721327	134735577	ENST00000304332	-	ENSG00000113648	H2AFY	protein_coding	1425	0.497193	0.000280702	0.00175439	NA	0.0126316	0.0273684	0.00245614	0.00547368	0.00140351	0.0213333	0.127509	0.00884211	0.025614	NA	NA	NA	NA	NA	NA	NA	0.0365614	NA	NA	NA	NA	325613	1575409	348180	629006	65504
chr5	141488070	141502320	ENST00000253814	+	ENSG00000131507	NDFIP1	protein_coding	1425	0.410316	7.01754e-05	0.00161404	0.00147368	0.00196491	0.0197895	NA	0.0105965	NA	0.0209123	0.288842	NA	NA	NA	NA	NA	0.00280702	NA	NA	0.00778947	0.213193	NA	NA	NA	NA	622221	118214	161921	95450	45938
chr5	156988533	157002783	ENST00000257527	-	ENSG00000135074	ADAM19	protein_coding	1425	0.465544	0.000421053	0.00168421	NA	NA	0.0279298	0.0037193	0.00785965	NA	NA	0.15207	0.00154386	0.0342456	NA	NA	NA	NA	NA	NA	NA	0.25186	NA	NA	NA	NA	392862	209967	767985	155539	98471
chr5	174905398	174919648	ENST00000321442	+	ENSG00000164466	SFXN1	protein_coding	1425	0.461544	0.000210526	0.00322807	0.0074386	0.00196491	0.0178947	0.0305965	0.00610526	NA	0.0138947	0.134877	NA	0.0553684	NA	NA	NA	NA	NA	NA	0.00175439	0.165614	NA	NA	NA	NA	719971	1518085	827667	1861732	51347
chr5	33878047	33892297	ENST00000504830	-	ENSG00000151388	ADAMTS12	protein_coding	1425	0.427719	0.000280702	0.00329825	0.00638596	0.00407018	0.0387368	0.00835088	0.013193	0.000701754	0.0452632	0.0389474	NA	0.00785965	NA	NA	NA	NA	NA	NA	0.00680702	0.158386	0.00694737	NA	NA	NA	1407453	94793	384101	764135	368657
chr6	11094039	11108289	ENST00000376935	+	ENSG00000224531	C6orf228	protein_coding	1425	0.452491	0.000140351	NA	0.00224561	0.00168421	0.0353684	0.00680702	0.00329825	0.000701754	0.0222456	0.0953684	0.00603509	0.324561	NA	NA	NA	NA	NA	NA	0.00442105	0.162596	NA	NA	NA	NA	878684	336825	49491	674242	42005
chr6	130686879	130701129	ENST00000296978	+	ENSG00000164484	TMEM200A	protein_coding	1425	0.417614	7.01754e-05	NA	0.00357895	0.00842105	0.0367719	NA	0.00533333	0.000631579	NA	0.117825	0.00582456	0.0836491	NA	NA	NA	NA	NA	NA	NA	0.0999298	NA	NA	NA	NA	31382	224285	433608	655509	77329
chr6	167412670	167426920	ENST00000366847	+	ENSG00000213066	FGFR1OP	protein_coding	1425	0.40414	0.000491228	0.00336842	0.00133333	NA	0.0277895	0.0126316	0.00414035	NA	0.0342456	0.0611228	0.0121404	0.0248421	NA	NA	NA	NA	NA	NA	0.00294737	0.117895	NA	NA	NA	NA	775000	3413042	2163204	1270	43236
chr6	36500997	36515247	ENST00000229812	-	ENSG00000112079	STK38	protein_coding	1425	0.418035	0.000140351	NA	0.00189474	NA	0.0154386	0.0138246	0.010807	NA	NA	0.263789	0.00210526	NA	NA	NA	NA	NA	NA	NA	0.00231579	0.400982	NA	NA	NA	NA	586290	307358	16932	46842	53578
chr6	38593674	38607924	ENST00000497373	-	ENSG00000183826	BTBD9	protein_coding	1425	0.404842	7.01754e-05	0.00182456	0.00757895	0.00182456	0.0271579	0.0119298	0.008	0.00133333	0.00870175	0.241754	0.00421053	0.0677193	NA	NA	NA	NA	NA	NA	0.0117895	0.139579	NA	NA	NA	NA	1100224	35777	445525	1152234	46184
chr7	32535038	32549288	ENST00000485228	+	ENSG00000105778	AVL9	protein_coding	1425	0.402737	7.01754e-05	NA	NA	0.00421053	0.0458947	0.00392982	0.00638596	0.000842105	0.0506667	0.251719	0.00694737	NA	NA	NA	NA	NA	NA	NA	0.00926316	0.231228	NA	NA	NA	NA	192523	1603036	332739	168	56824
chr8	26149007	26163257	ENST00000380737	+	ENSG00000221914	PPP2R2A	protein_coding	1425	0.381263	0.000561404	NA	0.00322807	0.00322807	0.044	0.00596491	0.00449123	0.00133333	0.0910877	0.0989474	0.0102456	NA	NA	0.0128421	NA	NA	NA	NA	0.00336842	0.108351	NA	NA	NA	NA	51515	783582	953396	833023	81189
chr8	30571193	30585443	ENST00000221130	-	ENSG00000104687	GSR	protein_coding	1425	0.471509	0.000140351	0.00498246	0.004	0.00301754	0.0508772	0.00140351	0.0124211	0.00077193	0.0465263	0.0532632	0.0121404	0.0202105	NA	NA	NA	NA	NA	NA	0.00491228	0.433614	NA	NA	NA	NA	29705	57682	115709	16246	49860
chr8	42752075	42766325	ENST00000307602	+	ENSG00000168172	HOOK3	protein_coding	1425	0.420632	0.000210526	NA	0.00610526	0.00322807	0.0374035	0.0134737	0.00898246	0.00077193	0.0727719	0.233123	0.00364912	0.0117895	NA	NA	NA	NA	NA	NA	NA	0.153263	NA	NA	NA	NA	119366	343935	5857400	209	122239
chr8	60017517	60031767	ENST00000361421	-	ENSG00000198846	TOX	protein_coding	1425	0.388211	0.000140351	NA	NA	0.0042807	0.0325614	0.010807	0.00463158	NA	NA	0.00224561	0.00666667	NA	NA	NA	NA	NA	NA	NA	0.00891228	0.0112281	NA	NA	NA	NA	419363	2381347	496348	1397701	313790
chr9	132427920	132442170	ENST00000372469	+	ENSG00000167157	PRRX2	protein_coding	1425	0.582105	7.01754e-05	NA	NA	0.0221754	0.0455439	0.0136842	0.00126316	0.00140351	0.0305965	0.0818246	0.0277895	NA	NA	NA	NA	NA	NA	NA	0.00701754	0.190175	NA	NA	NA	NA	97511	30041	32694	23472	56955
chr9	135531538	135545788	ENST00000372153	-	ENSG00000125485	DDX31	protein_coding	1425	0.440561	0.000701754	0.00407018	0.00175439	0.00112281	0.0265965	NA	0.00694737	0.000631579	0.0160702	0.14014	NA	0.0533333	NA	NA	NA	NA	NA	NA	NA	0.195649	NA	NA	NA	NA	223550	220946	1106595	208501	76112
chr9	16856591	16870841	ENST00000486514	-	ENSG00000173068	BNC2	protein_coding	1425	0.402947	7.01754e-05	0.00168421	NA	0.0082807	0.0208421	NA	0.010386	NA	NA	0.158877	0.00842105	NA	NA	NA	NA	NA	NA	NA	0.00287719	0.167649	NA	NA	NA	NA	1319838	2182299	1369214	264196	318263
chr9	33153104	33167354	ENST00000535206	-	ENSG00000086062	B4GALT1	protein_coding	1425	0.469193	0.000140351	0.00231579	0.00533333	0.00547368	0.030386	0.0152281	0.00589474	NA	0.0141754	0.162877	0.00385965	NA	NA	NA	NA	NA	NA	NA	0.00336842	0.112421	NA	NA	NA	NA	50640	85115	88292	97522	63274
chr9	36190928	36205178	ENST00000464497	+	ENSG00000122705	CLTA	protein_coding	1425	0.438737	0.000280702	0.00540351	0.00357895	0.00196491	0.0246316	0.00926316	0.00449123	NA	0.0210526	0.0332632	0.00308772	NA	NA	NA	NA	NA	NA	NA	0.00203509	0.28814	NA	NA	NA	NA	341976	19597	105470	232777	113850
chr9	88556061	88570311	ENST00000361671	+	ENSG00000135040	NAA35	protein_coding	1425	0.414947	0.000210526	0.00182456	0.00168421	0.00210526	0.0289825	0.00624561	0.00645614	0.00133333	0.166596	0.128351	NA	NA	NA	NA	NA	NA	NA	NA	0.00280702	0.262947	NA	NA	NA	NA	1744912	1937074	44996	199117	81152
chrX	10530745	10544995	ENST00000380779	-	ENSG00000101871	MID1	protein_coding	1425	0.399439	0.000140351	0.00512281	0.00329825	NA	0.0147368	0.00364912	0.00666667	0.000631579	0.0155789	0.0296842	0.00308772	0.0605614	NA	NA	NA	NA	NA	NA	0.0170526	0.0675789	NA	NA	NA	NA	2609215	3185365	392477	584410	131399
chrX	119588970	119603220	ENST00000434600	-	ENSG00000005893	LAMP2	protein_coding	1425	0.406526	0.000280702	0.00505263	0.00252632	NA	0.0197895	0.00961404	0.00701754	NA	0.0584561	0.0935439	0.0037193	0.012	NA	NA	NA	NA	NA	NA	0.00807018	0.154386	NA	NA	NA	NA	184098	55225	170969	134523	41538
chrX	128643227	128657477	ENST00000371122	-	ENSG00000102038	SMARCA1	protein_coding	1425	0.376982	0.000421053	0.00512281	NA	0.00498246	0.0386667	0.0121404	0.00989474	0.00077193	0.0511579	0.0635088	0.02	NA	NA	NA	NA	NA	NA	NA	0.00905263	0.149895	NA	NA	NA	NA	5750573	279786	5380972	16774	76995
chr10	74371899	74385899	ENST00000398761	-	ENSG00000107745	MICU1	protein_coding	1400	0.406643	7.14286e-05	0.006	NA	NA	0.0275714	NA	0.007	NA	0.0272857	0.2225	0.0106429	0.0272143	NA	NA	NA	NA	NA	NA	0.00364286	0.346786	NA	NA	NA	NA	9358	381080	310102	65989	258801
chr10	94050920	94064920	ENST00000358935	+	ENSG00000198060	2013-03-05	protein_coding	1400	0.427929	7.14286e-05	0.00407143	NA	0.00685714	0.0442143	0.0015	0.0118571	NA	0.0728571	0.0487857	NA	0.0235714	NA	NA	NA	NA	NA	NA	0.00571429	0.340714	NA	NA	NA	NA	261904	260840	120520	45	62801
chr1	100584511	100598511	ENST00000462159	-	ENSG00000156876	SASS6	protein_coding	1400	0.387857	0.0005	0.00335714	0.008	0.00121429	0.0356429	0.00292857	0.002	NA	0.0791429	0.0552143	0.00478571	0.0280714	NA	NA	NA	NA	NA	NA	0.00242857	0.280429	NA	NA	NA	NA	327162	53966	9582	194	49392
chr11	120207787	120221787	ENST00000397843	+	ENSG00000196914	ARHGEF12	protein_coding	1400	0.371714	7.14286e-05	0.0035	0.00364286	NA	0.0264286	0.00828571	0.00678571	0.000857143	0.038	0.0233571	0.0143571	0.0238571	NA	NA	NA	NA	NA	NA	0.00685714	0.146714	NA	NA	NA	NA	647015	3399	1712023	608352	152858
chr1	112268025	112282025	ENST00000527570	-	ENSG00000197852	FAM212B	protein_coding	1400	0.526214	0.000142857	NA	0.00307143	0.0108571	0.0446429	0.00692857	0.00564286	NA	0.0285714	0.0286429	NA	NA	NA	NA	NA	NA	NA	NA	0.00792857	0.118286	NA	NA	NA	NA	250195	784115	220891	16164	58773
chr11	123051989	123065989	ENST00000448775	-	ENSG00000166250	CLMP	protein_coding	1400	0.471071	0.000285714	NA	0.00342857	0.00457143	0.0339286	0.00292857	0.00742857	NA	0.0292143	0.0533571	0.00957143	NA	NA	NA	NA	NA	NA	NA	0.00707143	0.190143	NA	NA	NA	NA	93088	529007	135670	330538	122954
chr11	3173969	3187969	ENST00000534491	-	ENSG00000021762	OSBPL5	protein_coding	1400	0.595071	0.000357143	NA	0.00135714	0.0208571	0.0295	0.0157857	0.00214286	0.00285714	0.0113571	0.0485	0.00421429	0.0240714	NA	NA	NA	NA	NA	NA	0.0015	0.0357857	NA	NA	NA	NA	69288	191187	201493	214221	73354
chr11	46853843	46867843	ENST00000312055	-	ENSG00000175216	CKAP5	protein_coding	1400	0.428143	7.14286e-05	0.00171429	0.00642857	0.00142857	0.0332857	0.00278571	0.0106429	NA	NA	0.245	0.00714286	0.0914286	NA	NA	NA	NA	NA	NA	0.00678571	0.315714	NA	NA	NA	NA	43794	318005	100377	118	102757
chr1	149968625	149982625	ENST00000369135	-	ENSG00000163113	OTUD7B	protein_coding	1400	0.408071	7.14286e-05	0.00171429	0.00392857	0.00164286	0.0275714	0.0095	0.00321429	NA	NA	0.0685	0.00207143	NA	NA	NA	NA	NA	NA	NA	0.00342857	0.156071	NA	NA	NA	NA	33834	208091	70277	56716	70394
chr1	154192655	154206655	ENST00000343815	+	ENSG00000143569	UBAP2L	protein_coding	1400	0.440857	0.0005	0.00342857	0.0015	0.00614286	0.0287857	0.0207143	0.00942857	NA	NA	0.0329286	0.00528571	NA	NA	NA	NA	NA	NA	NA	0.0095	0.283929	NA	NA	NA	NA	12383	228024	288395	28046	43326
chr1	157963063	157977063	ENST00000392272	+	ENSG00000183853	KIRREL	protein_coding	1400	0.497071	7.14286e-05	0.00171429	NA	0.0107143	0.025	0.0144286	0.00528571	0.000642857	0.0280714	0.0231429	0.00935714	NA	NA	NA	NA	NA	NA	NA	0.0055	0.130714	NA	NA	NA	NA	976618	1076837	1801200	854680	102775
chr1	16010827	16024827	ENST00000375799	+	ENSG00000116786	PLEKHM2	protein_coding	1400	0.489143	7.14286e-05	NA	0.00435714	0.00485714	0.0276429	0.00135714	0.0116429	0.000642857	0.0123571	0.0514286	0.0212857	NA	NA	NA	NA	NA	NA	NA	0.00892857	0.423857	NA	NA	NA	NA	11981	22610	82829	159542	50437
chr11	68228186	68242186	ENST00000393799	+	ENSG00000110075	PPP6R3	protein_coding	1400	0.454429	7.14286e-05	0.00357143	0.00371429	0.00607143	0.0346429	0.0147857	0.00828571	NA	0.045	0.230786	0.00678571	0.0554286	NA	NA	NA	NA	NA	NA	0.00321429	0.205786	NA	NA	NA	NA	403132	409820	206721	188717	154611
chr1	178995031	179009031	ENST00000263733	+	ENSG00000116199	FAM20B	protein_coding	1400	0.425429	0.000142857	NA	0.00328571	0.00342857	0.0255714	0.0133571	0.00957143	NA	NA	0.00571429	0.00635714	0.0333571	0.0117143	NA	NA	NA	NA	NA	0.0116429	0.138	NA	NA	NA	NA	16080	105794	33430	931903	50666
chr1	179098179	179112179	ENST00000408940	-	ENSG00000143322	ABL2	protein_coding	1400	0.447357	0.000285714	0.00164286	0.0085	0.0015	0.0374286	0.0220714	0.00721429	NA	0.0637857	0.101857	0.00478571	NA	0.142714	NA	NA	NA	NA	NA	0.00928571	0.174571	NA	NA	NA	NA	1009051	696922	7050	150837	43716
chr1	193091147	193105147	ENST00000367435	+	ENSG00000134371	CDC73	protein_coding	1400	0.386357	0.0005	NA	0.00342857	0.00192857	0.0265	NA	0.0133571	NA	0.0298571	0.253143	0.0117143	NA	NA	NA	NA	NA	NA	NA	0.00785714	0.256786	NA	NA	NA	NA	4740534	30241	3922109	15903	131884
chr12	102210716	102224716	ENST00000299314	-	ENSG00000111670	GNPTAB	protein_coding	1400	0.4455	7.14286e-05	0.00678571	0.00435714	NA	0.0222143	0.0117143	0.00585714	NA	0.0240714	0.100429	0.0115	0.142929	NA	NA	NA	NA	NA	NA	0.00921429	0.312571	NA	NA	NA	NA	383144	182000	61870	46388	85441
chr12	110437328	110451328	ENST00000261739	+	ENSG00000076513	ANKRD13A	protein_coding	1400	0.441429	0.000214286	NA	NA	0.00364286	0.0192143	0.015	0.00564286	NA	0.0217857	0.200929	NA	NA	NA	NA	NA	NA	NA	NA	NA	0.333429	NA	NA	NA	NA	84811	81454	1654	3134	40240
chr12	120689574	120703574	ENST00000228307	-	ENSG00000089159	PXN	protein_coding	1400	0.506643	0.000142857	NA	0.00642857	0.003	0.0311429	0.0179286	0.00935714	NA	0.0113571	0.0680714	0.00228571	NA	NA	NA	NA	NA	NA	NA	NA	0.3705	NA	NA	NA	NA	24560	178189	12943	172329	55324
chr12	122516628	122530628	ENST00000319080	+	ENSG00000175727	MLXIP	protein_coding	1400	0.488143	7.14286e-05	0.00171429	0.00564286	0.00121429	0.0247857	0.00135714	0.0113571	NA	0.021	0.106071	0.0109286	0.0426429	NA	NA	NA	NA	NA	NA	0.00342857	0.188	NA	NA	NA	NA	455180	16678	135580	275238	112638
chr12	95611522	95625522	ENST00000436874	+	ENSG00000028203	VEZT	protein_coding	1400	0.390929	0.000285714	0.00914286	0.00185714	NA	0.0217857	0.0159286	0.00871429	NA	0.0427857	0.187786	0.00585714	0.0429286	NA	NA	NA	NA	NA	NA	0.00221429	0.253643	NA	NA	NA	NA	50673	383293	400060	282	85044
chr13	110945496	110959496	ENST00000397198	-	ENSG00000187498	COL4A1	protein_coding	1400	0.444286	0.000142857	0.00664286	0.00342857	0.00607143	0.0251429	NA	0.00171429	0.00135714	0.0184286	0.0769286	0.00635714	0.0582857	NA	NA	NA	NA	NA	NA	0.00214286	0.032	NA	NA	NA	NA	480582	215916	2032893	134	158178
chr13	41226734	41240734	ENST00000379561	-	ENSG00000150907	FOXO1	protein_coding	1400	0.465071	7.14286e-05	NA	NA	0.0035	0.0407143	0.0196429	0.00957143	0.00157143	NA	0.0243571	0.00857143	NA	NA	NA	NA	NA	NA	NA	0.00978571	0.248143	NA	NA	NA	NA	1023378	61229	834932	122812	110917
chr14	34917980	34931980	ENST00000551935	-	ENSG00000129521	EGLN3	protein_coding	1400	0.437357	0.000142857	0.00164286	0.00228571	0.0137857	0.0267857	0.0132143	0.0102857	NA	0.028	NA	0.0102857	0.000785714	NA	NA	NA	NA	NA	NA	0.00314286	0.386643	NA	NA	NA	NA	2965300	53154	1589712	520123	477393
chr1	43855640	43869640	ENST00000562955	+	ENSG00000198198	SZT2	protein_coding	1400	0.441429	0.000214286	NA	NA	0.00228571	0.0182143	0.0167857	0.0100714	NA	0.0472857	0.133857	0.00142857	NA	NA	NA	NA	NA	NA	NA	NA	0.368786	NA	NA	NA	NA	100906	26767	21033	157	62664
chr1	46269285	46283285	ENST00000361297	+	ENSG00000086015	MAST2	protein_coding	1400	0.437571	7.14286e-05	0.00171429	0.00171429	0.00157143	0.018	0.0085	0.0147857	NA	0.087	0.154643	0.00542857	0.0117857	NA	NA	NA	NA	NA	NA	0.00264286	0.355286	NA	NA	NA	NA	359720	109177	196526	52800	232511
chr14	65171154	65185154	ENST00000247226	+	ENSG00000126822	PLEKHG3	protein_coding	1400	0.487357	0.000142857	NA	0.00142857	0.0174286	0.0237857	0.00914286	0.002	0.0015	0.0114286	0.0565	NA	NA	NA	NA	NA	NA	NA	NA	0.0148571	0.106857	NA	NA	NA	NA	169924	161200	201377	200600	42456
chr14	71787166	71801166	ENST00000555989	+	ENSG00000197555	SIPA1L1	protein_coding	1400	0.419786	0.000428571	0.00164286	0.012	NA	0.0204286	0.00542857	0.00607143	NA	NA	0.114143	0.00885714	NA	NA	NA	NA	NA	NA	NA	0.00392857	0.108143	NA	NA	NA	NA	37887	205067	1309493	511278	267316
chr14	85996488	86010488	ENST00000330753	+	ENSG00000185070	FLRT2	protein_coding	1400	0.437071	0.000142857	0.00164286	0.00342857	0.00407143	0.0250714	0.0156429	0.00728571	0.00292857	0.00885714	0.026	0.00757143	NA	NA	NA	NA	NA	NA	NA	0.0115	0.0331429	NA	NA	NA	NA	2815499	7596191	2362869	3996283	98546
chr1	52442436	52456436	ENST00000371655	-	ENSG00000169213	RAB3B	protein_coding	1400	0.462643	0.000214286	0.00171429	0.0015	0.0194286	0.0312857	0.00407143	0.00757143	0.000642857	0.106143	0.0862143	0.0165	NA	NA	NA	NA	NA	NA	NA	0.00685714	0.349571	NA	NA	NA	NA	71827	29367	161545	65420	82808
chr15	41709302	41723302	ENST00000389629	+	ENSG00000137815	RTF1	protein_coding	1400	0.468357	7.14286e-05	0.002	0.00178571	0.00735714	0.0257857	0.00514286	0.0102143	NA	0.02	0.0551429	0.00157143	NA	NA	NA	NA	NA	NA	NA	0.00757143	0.542571	NA	NA	NA	NA	36753	36054	60072	14660	66459
chr15	42551861	42565861	ENST00000389834	-	ENSG00000103978	TMEM87A	protein_coding	1400	0.383714	0.000785714	0.00185714	0.00392857	0.00142857	0.0272857	0.00578571	0.00971429	NA	0.112286	0.156071	0.00171429	NA	NA	NA	NA	NA	NA	NA	0.00714286	0.190929	NA	NA	NA	NA	25359	139159	385515	504	63131
chr15	56271944	56285944	ENST00000435532	-	ENSG00000069869	NEDD4	protein_coding	1400	0.421429	0.000214286	NA	0.00835714	0.00521429	0.0265	0.00514286	0.00664286	NA	0.0477857	0.3185	0.00407143	0.0417857	NA	NA	NA	NA	NA	NA	0.00735714	0.144857	NA	NA	NA	NA	364894	96786	598098	924888	166824
chr16	1662386	1676386	ENST00000397412	+	ENSG00000007545	CRAMP1L	protein_coding	1400	0.5275	0.000428571	0.00514286	NA	0.0103571	0.0337143	0.0100714	0.00607143	0.000642857	0.00421429	0.00628571	0.0228571	NA	NA	NA	NA	NA	NA	NA	NA	0.2025	NA	NA	NA	NA	25891	57143	117934	277	65523
chr16	53088945	53102945	ENST00000447540	+	ENSG00000177200	CHD9	protein_coding	1400	0.461929	7.14286e-05	0.00171429	0.00628571	0.00214286	0.0333571	0.00771429	0.00871429	NA	0.112929	0.0864286	0.00435714	0.0202857	NA	NA	NA	NA	NA	NA	0.0075	0.425714	NA	NA	NA	0.0172857	339405	2253099	396246	1903762	272468
chr16	69458428	69472428	ENST00000512062	+	ENSG00000103018	CYB5B	protein_coding	1400	0.414929	7.14286e-05	NA	0.0115714	0.00192857	0.0234286	0.00978571	0.0102143	0.000642857	0.0509286	0.276143	0.00292857	0.0321429	NA	NA	NA	NA	NA	NA	0.00471429	0.316286	NA	NA	NA	NA	101440	81415	101282	38554	41741
chr16	89574811	89588811	ENST00000268704	+	ENSG00000197912	SPG7	protein_coding	1400	0.498357	0.000357143	NA	0.0025	NA	0.0446429	0.00235714	0.0126429	0.000714286	0.0158571	0.0385	0.00285714	NA	NA	NA	NA	NA	NA	NA	0.00364286	0.473286	NA	NA	NA	NA	12253	278846	96032	17842	49363
chr17	17861736	17875736	ENST00000579586	-	ENSG00000175662	TOM1L2	protein_coding	1400	0.456643	7.14286e-05	NA	0.00321429	0.0114286	0.0236429	0.00778571	0.0127143	0.000642857	0.00971429	0.0714286	NA	0.0617143	NA	NA	NA	NA	NA	NA	0.00178571	0.325	NA	NA	NA	NA	95411	45597	120971	66874	78744
chr17	2496504	2510504	ENST00000576586	+	ENSG00000007168	PAFAH1B1	protein_coding	1400	0.442929	0.000142857	0.00321429	NA	0.0121429	0.043	0.00728571	0.0109286	NA	NA	0.0372143	0.0154286	NA	NA	NA	NA	NA	NA	NA	0.00671429	0.350214	NA	NA	NA	NA	163227	212156	56175	81304	73835
chr17	36508111	36522111	ENST00000331159	+	ENSG00000174111	SOCS7	protein_coding	1400	0.4605	0.000285714	0.00171429	0.00292857	0.00192857	0.0336429	NA	0.00685714	NA	NA	0.0367143	0.00435714	NA	NA	NA	NA	NA	NA	NA	0.00357143	0.179	NA	NA	NA	NA	36608	29010	342038	94855	47790
chr19	13603317	13617317	ENST00000573710	-	ENSG00000141837	CACNA1A	protein_coding	1400	0.470143	7.14286e-05	0.0055	0.00814286	0.0116429	0.0278571	0.00735714	0.0095	NA	0.0661429	0.143357	0.0035	0.0245714	NA	NA	NA	NA	NA	NA	0.0327857	0.0998571	NA	NA	NA	NA	316330	328012	311599	241435	299190
chr19	39138310	39152310	ENST00000252699	+	ENSG00000130402	ACTN4	protein_coding	1400	0.4785	0.000142857	0.00185714	NA	0.00442857	0.0207857	0.00771429	0.00907143	NA	0.0532143	0.0154286	0.00314286	NA	NA	NA	NA	NA	NA	NA	NA	0.233714	NA	NA	NA	NA	212029	10715	127751	331704	83913
chr1	94883933	94897933	ENST00000394233	+	ENSG00000117528	ABCD3	protein_coding	1400	0.401286	0.000142857	0.00178571	0.00185714	0.00192857	0.0334286	0.0107143	0.00364286	NA	0.0305714	0.203429	0.00407143	0.176714	NA	NA	NA	NA	NA	NA	0.00728571	0.0869286	NA	NA	NA	NA	469650	863715	70798	180626	100286
chr1	98372605	98386605	ENST00000306031	-	ENSG00000188641	DPYD	protein_coding	1400	0.364429	7.14286e-05	0.00364286	0.00185714	NA	0.0335	NA	0.00592857	NA	0.0146429	0.189143	0.00971429	0.0172143	NA	NA	NA	NA	NA	NA	NA	0.0791429	NA	NA	NA	NA	2808098	124193	1066000	740630	201291
chr1	9870584	9884584	ENST00000377288	-	ENSG00000171603	CLSTN1	protein_coding	1400	0.457571	7.14286e-05	0.00171429	NA	0.0100714	0.0409286	0.00614286	0.00785714	0.000714286	0.0132857	0.0813571	0.00264286	NA	NA	NA	NA	NA	NA	NA	0.013	0.363214	NA	NA	NA	NA	632748	23749	55412	118901	95498
chr20	34359896	34373896	ENST00000461122	+	ENSG00000025293	PHF20	protein_coding	1400	0.468714	0.000142857	0.00164286	0.00328571	0.00492857	0.0263571	0.00757143	0.00985714	NA	0.0107143	0.0167857	0.00921429	NA	NA	NA	NA	NA	NA	NA	NA	0.504429	NA	NA	NA	NA	300451	70994	141642	29638	91426
chr20	35089741	35103741	ENST00000475894	+	ENSG00000080845	DLGAP4	protein_coding	1400	0.5225	0.000285714	0.00164286	0.00214286	0.0217143	0.0202857	0.00585714	0.00764286	NA	NA	0.0577857	0.00521429	NA	NA	NA	NA	NA	NA	NA	0.0217857	0.2695	NA	NA	NA	NA	40155	244888	150427	450859	67299
chr20	43595115	43609115	ENST00000372806	+	ENSG00000101109	STK4	protein_coding	1400	0.392571	0.000428571	0.00342857	0.0085	0.00135714	0.0264286	0.0166429	0.0045	0.000642857	0.0035	0.0585714	NA	0.0495	NA	NA	NA	NA	NA	NA	0.00714286	0.154	NA	NA	NA	NA	355461	27153	318813	6001	113485
chr20	54987168	55001168	ENST00000360314	+	ENSG00000087589	CASS4	protein_coding	1400	0.441429	0.000142857	0.00807143	NA	0.0015	0.0360714	0.007	0.00671429	NA	0.0388571	0.0842857	0.00364286	NA	NA	NA	NA	NA	NA	NA	0.00228571	0.223857	NA	NA	NA	NA	16478	7586	1196283	19817	46668
chr2	121493199	121507199	ENST00000472722	+	ENSG00000074047	GLI2	protein_coding	1400	0.510929	0.000142857	0.00321429	0.00528571	0.0174286	0.0252143	0.0105	0.00664286	0.00192857	0.0217143	0.049	0.0295714	NA	NA	NA	NA	NA	NA	NA	0.00928571	0.0363571	NA	NA	NA	NA	21667	440913	562152	512215	216140
chr2	170440850	170454850	ENST00000260970	+	ENSG00000138398	PPIG	protein_coding	1400	0.423714	0.000142857	0.00171429	NA	0.0015	0.0477857	0.00435714	0.0118571	0.000714286	0.0101429	0.0737143	0.00392857	NA	NA	NA	NA	NA	NA	NA	0.003	0.432143	NA	NA	NA	NA	70113	77685	21084	10426	57066
chr2	201170604	201184604	ENST00000439084	+	ENSG00000196141	SPATS2L	protein_coding	1400	0.443	0.000214286	0.0101429	0.00164286	0.00385714	0.0312857	0.00892857	0.00457143	0.002	0.0315714	0.133	0.0102857	NA	NA	NA	NA	NA	NA	NA	0.00185714	0.0701429	NA	NA	NA	NA	180260	341757	143079	350145	113452
chr22	18470267	18484267	ENST00000495076	-	ENSG00000243156	MICAL3	protein_coding	1400	0.506214	0.000142857	NA	0.00178571	0.00135714	0.0278571	0.00271429	0.00707143	0.00135714	0.0235714	0.0605	NA	NA	NA	NA	NA	NA	NA	NA	0.00207143	0.275786	NA	NA	NA	NA	186836	539527	232278	76418	161909
chr2	223507056	223521056	ENST00000281828	-	ENSG00000116120	FARSB	protein_coding	1400	0.399143	0.000285714	NA	0.00185714	NA	0.0289286	0.0110714	0.00692857	0.000642857	0.073	0.0360714	0.00892857	0.156357	NA	NA	NA	NA	NA	NA	NA	0.117357	NA	NA	NA	NA	317341	1098990	2974354	204675	85801
chr2	42396490	42410490	ENST00000318522	+	ENSG00000143924	EML4	protein_coding	1400	0.412429	0.000214286	0.0035	NA	0.0035	0.0213571	0.00935714	0.0121429	NA	0.0204286	0.174714	0.00142857	0.0192857	NA	NA	NA	NA	NA	NA	0.000642857	0.234143	NA	NA	NA	NA	359180	2568006	141154	1656915	163198
chr3	101442769	101456769	ENST00000341893	+	ENSG00000182504	CEP97	protein_coding	1400	0.424286	0.000428571	0.00364286	NA	0.00178571	0.0572857	0.00707143	0.00642857	NA	0.019	0.194357	NA	NA	NA	NA	NA	NA	NA	NA	NA	0.255	NA	NA	NA	NA	15259	44712	3894339	37206	46637
chr3	141121191	141135191	ENST00000510338	+	ENSG00000177311	ZBTB38	protein_coding	1400	0.4415	0.000285714	0.00164286	NA	0.00164286	0.0322857	0.0110714	0.00428571	NA	0.0413571	0.00357143	0.00235714	NA	NA	NA	NA	NA	NA	NA	0.00235714	0.108643	NA	NA	NA	NA	44734	107705	502078	2012669	40477
chr3	157237408	157251408	ENST00000479987	-	ENSG00000197415	VEPH1	protein_coding	1400	0.376643	7.14286e-05	0.00485714	0.0055	0.00157143	0.0272857	NA	0.00521429	0.000642857	0.0455714	0.231857	0.00214286	NA	NA	NA	NA	NA	NA	NA	0.0117857	0.0873571	NA	NA	NA	NA	332926	1132794	49991	9724	105297
chr3	169885537	169899537	ENST00000466189	-	ENSG00000173889	PHC3	protein_coding	1400	0.398786	0.000357143	0.00514286	0.00221429	0.00314286	0.0335	NA	0.00964286	NA	0.0689286	0.0447857	0.00785714	0.025	NA	NA	NA	NA	NA	NA	0.00157143	0.237429	NA	NA	NA	NA	328963	683127	143376	40682	45215
chr3	183415606	183429606	ENST00000421660	+	ENSG00000163872	YEATS2	protein_coding	1400	0.436571	7.14286e-05	0.00164286	0.00178571	0.0035	0.0237143	0.008	0.0112143	0.000785714	0.0252143	0.159357	0.00164286	NA	NA	NA	NA	NA	NA	NA	0.00464286	0.349071	NA	NA	NA	NA	397203	13302	78057	598241	114807
chr3	42832010	42846010	ENST00000431549	-	ENSG00000181061	HIGD1A	protein_coding	1400	0.451286	0.000214286	0.00164286	NA	0.00678571	0.0442857	0.00264286	0.00735714	NA	0.0224286	0.0672143	0.00642857	0.0897857	0.169071	NA	NA	NA	NA	NA	0.00271429	0.180929	NA	NA	NA	NA	163438	274718	96938	101391	47341
chr3	53367637	53381637	ENST00000480258	-	ENSG00000162290	DCP1A	processed_transcript	1400	0.397643	0.000285714	0.00335714	NA	0.00578571	0.0317143	0.0186429	0.00928571	0.000714286	0.0127143	0.145429	0.00142857	NA	NA	NA	NA	NA	NA	NA	0.00357143	0.2545	NA	NA	NA	NA	51507	519456	114904	3209546	64189
chr3	64239655	64253655	ENST00000498162	-	ENSG00000163637	PRICKLE2	protein_coding	1400	0.426786	7.14286e-05	NA	NA	0.00657143	0.0217143	0.00628571	0.00685714	0.000642857	0.0642143	0.131786	0.00585714	0.0936429	NA	NA	NA	NA	NA	NA	NA	0.0749286	NA	NA	NA	NA	2524	1086250	215738	1865629	110669
chr4	103668151	103682151	ENST00000226578	-	ENSG00000109323	MANBA	protein_coding	1400	0.395071	0.000214286	NA	NA	NA	0.0528571	NA	0.00528571	0.000642857	NA	0.259286	0.00614286	0.0402857	NA	NA	NA	NA	NA	NA	0.00335714	0.174071	NA	NA	NA	NA	1373523	34981	103692	107983	129101
chr4	146845787	146859787	ENST00000508784	-	ENSG00000151612	ZNF827	protein_coding	1400	0.445429	7.14286e-05	NA	NA	0.0223571	0.0200714	0.0140714	0.0127857	0.000857143	0.0485714	0.0505714	0.0401429	0.0515714	NA	NA	NA	NA	NA	NA	0.00892857	0.0790714	NA	NA	NA	NA	718955	315349	238600	237047	181008
chr4	186111155	186125155	ENST00000458385	-	ENSG00000164323	KIAA1430	protein_coding	1400	0.435143	0.000142857	0.0035	NA	NA	0.0432857	0.00335714	0.00557143	NA	0.170786	0.0445	0.00807143	0.0192143	NA	NA	NA	NA	NA	NA	NA	0.373786	NA	NA	0.00235714	NA	337940	195538	13617	6128	44336
chr4	56815147	56829147	ENST00000257287	+	ENSG00000174799	CEP135	protein_coding	1400	0.388786	0.000428571	0.00171429	NA	0.00657143	0.0354286	0.00778571	0.00757143	0.00192857	0.0292857	0.175	0.00807143	NA	NA	NA	NA	NA	NA	NA	NA	0.214857	NA	NA	NA	NA	446767	43903	349309	402150	83390
chr4	83955600	83969600	ENST00000509093	+	ENSG00000138663	COPS4	protein_coding	1400	0.406786	0.000214286	NA	NA	0.00142857	0.0244286	0.00928571	0.00728571	0.000642857	0.0184286	0.110143	0.00221429	0.0706429	NA	NA	NA	NA	NA	NA	0.00185714	0.347357	NA	NA	NA	NA	381517	114316	15610	21560	41342
chr5	133547762	133561762	ENST00000519718	-	ENSG00000113558	SKP1	protein_coding	1400	0.408357	0.000285714	0.00371429	NA	NA	0.0333571	NA	0.00657143	NA	0.119357	NA	NA	NA	NA	NA	NA	NA	NA	NA	NA	0.274857	NA	NA	NA	NA	9038	72352	37842	145107	58901
chr5	43120985	43134985	ENST00000515326	+	ENSG00000172262	ZNF131	protein_coding	1400	0.437929	0.000357143	NA	0.00171429	0.004	0.0489286	0.00342857	0.009	0.00142857	0.0457143	0.133571	0.00292857	NA	NA	NA	NA	NA	NA	NA	0.00342857	0.3175	NA	NA	NA	NA	441805	75615	128507	53912	40890
chr5	60240956	60254956	ENST00000296597	+	ENSG00000164182	NDUFAF2	protein_coding	1400	0.361714	7.14286e-05	0.00164286	0.00342857	0.00171429	0.0309286	0.0120714	0.00578571	NA	NA	0.355286	0.00214286	NA	NA	NA	NA	NA	NA	NA	NA	0.131643	NA	NA	NA	NA	347143	3680450	172579	51	207897
chr6	111303218	111317218	ENST00000441448	+	ENSG00000197498	RPF2	protein_coding	1400	0.418214	0.000357143	NA	0.00135714	0.00192857	0.0347857	0.00864286	0.0131429	NA	0.031	0.0992857	0.00442857	NA	NA	NA	NA	NA	NA	NA	0.0025	0.432286	NA	NA	NA	NA	237263	14127	277015	166806	44085
chr6	119201520	119215520	ENST00000505485	-	ENSG00000111877	MCM9	protein_coding	1400	0.382643	0.000142857	0.00521429	0.00392857	NA	0.0233571	NA	0.00785714	0.00142857	0.0222857	0.469214	0.0108571	0.0265	NA	NA	NA	NA	NA	NA	0.00242857	0.0841429	NA	NA	NA	NA	144282	283746	1143634	2541224	66343
chr6	3259218	3273218	ENST00000451246	+	ENSG00000180822	PSMG4	protein_coding	1400	0.518214	0.000285714	0.005	0.00164286	0.00742857	0.0257143	0.00535714	0.00321429	0.00128571	0.0249286	0.0342143	0.0116429	0.0179286	NA	NA	NA	NA	NA	NA	NA	0.0802857	NA	NA	NA	NA	550413	105786	423617	101435	44389
chr6	8088763	8102763	ENST00000397456	-	ENSG00000265818	EEF1E1-MUTED	protein_coding	1400	0.392929	0.000357143	0.00335714	0.00442857	NA	0.0393571	0.00685714	0.006	NA	0.0628571	0.149643	0.00657143	0.101214	NA	NA	NA	NA	NA	NA	0.00564286	0.165286	NA	NA	NA	NA	151716	310537	450563	2309787	86804
chr6	89659348	89673348	ENST00000265607	-	ENSG00000111880	RNGTT	protein_coding	1400	0.409	7.14286e-05	0.00507143	0.00707143	NA	0.0243571	0.0177857	0.00628571	NA	0.101429	0.560643	NA	0.0322143	NA	NA	NA	NA	NA	NA	0.00685714	0.173714	NA	0.003	NA	NA	1221363	362995	1256176	117080	353359
chr7	103834495	103848495	ENST00000297431	-	ENSG00000164815	ORC5	protein_coding	1400	0.381786	0.000428571	0.00164286	NA	0.00164286	0.0420714	0.0153571	0.000642857	NA	0.0612143	0.0555714	0.00664286	0.0558571	NA	NA	NA	NA	NA	NA	NA	0.101786	NA	NA	NA	NA	823175	773698	798653	806141	81707
chr7	129251555	129265555	ENST00000353868	+	ENSG00000106459	NRF1	protein_coding	1400	0.413857	7.14286e-05	0.00357143	0.00428571	0.00242857	0.0448571	0.0141429	0.0115	NA	0.0402143	0.0602857	0.0125	0.0310714	NA	NA	NA	NA	NA	NA	0.015	0.201	NA	NA	NA	NA	418793	123316	179017	556328	145365
chr7	36429415	36443415	ENST00000265748	+	ENSG00000011426	ANLN	protein_coding	1400	0.400143	0.0005	0.00178571	0.00614286	NA	0.0382143	0.00942857	0.00764286	0.00157143	0.0282143	0.0735714	0.00664286	0.163929	NA	NA	NA	NA	NA	NA	0.00435714	0.169	NA	NA	NA	NA	1748392	88263	2294127	694643	63985
chr7	39663082	39677082	ENST00000005257	+	ENSG00000006451	RALA	protein_coding	1400	0.422714	0.000142857	NA	0.0035	0.00228571	0.0362143	0.00642857	0.00628571	0.000642857	0.0498571	0.189214	0.0015	0.0857857	NA	NA	NA	NA	NA	NA	0.00707143	0.182786	NA	NA	NA	NA	70084	50602	469259	714282	84641
chr7	4721940	4735940	ENST00000328914	+	ENSG00000164916	FOXK1	protein_coding	1400	0.490714	0.000142857	0.00178571	0.00492857	0.0103571	0.0385714	0.00307143	0.00821429	NA	0.0507143	0.0568571	0.00457143	NA	NA	NA	NA	NA	NA	NA	0.00771429	0.272857	0.00764286	NA	NA	NA	53321	1966871	76799	1837981	89134
chr8	57109859	57123859	ENST00000423799	-	ENSG00000181690	PLAG1	protein_coding	1400	0.380571	0.000142857	0.00328571	0.00364286	0.00557143	0.0378571	0.0186429	0.00728571	0.00128571	NA	0.0402857	0.0137857	NA	NA	NA	NA	NA	NA	NA	0.00192857	0.00471429	NA	NA	NA	NA	96719	307018	158853	455	45201
chr8	67976603	67990603	ENST00000412460	+	ENSG00000104218	CSPP1	protein_coding	1400	0.396786	0.000428571	0.00185714	0.0045	NA	0.0204286	NA	0.00678571	NA	0.00592857	0.154071	0.00357143	0.0393571	NA	NA	NA	NA	NA	NA	0.00721429	0.312857	NA	NA	NA	NA	2362255	202346	93280	2041	131891
chr9	32384618	32398618	ENST00000379921	+	ENSG00000122729	ACO1	protein_coding	1400	0.427071	0.000142857	0.0035	0.00492857	0.00192857	0.0330714	0.0102857	0.00728571	NA	0.0627143	0.0281429	0.00592857	0.0757857	NA	NA	NA	NA	NA	NA	0.00692857	0.099	NA	NA	NA	0.0193571	126523	5154446	30681	4810776	66113
chr9	72873937	72887937	ENST00000361138	+	ENSG00000198887	SMC5	protein_coding	1400	0.392143	0.000214286	NA	0.00221429	0.00392857	0.0223571	0.00821429	0.0065	NA	0.0518571	0.291143	0.00728571	0.0531429	NA	NA	NA	NA	NA	NA	NA	0.2095	NA	NA	NA	NA	1612485	32049	85575	147	95867
chrX	10574674	10588674	ENST00000317552	-	ENSG00000101871	MID1	protein_coding	1400	0.403714	7.14286e-05	NA	NA	0.00364286	0.0317857	NA	0.00178571	NA	0.0153571	0.0585714	0.002	NA	NA	NA	NA	NA	NA	NA	0.0125714	0.0707857	NA	NA	NA	NA	2652894	3141686	436156	540731	175324
chrX	69509879	69523879	ENST00000374388	+	ENSG00000090889	KIF4A	protein_coding	1400	0.385929	0.000571429	0.00357143	NA	0.00464286	0.0385	0.00685714	0.00421429	NA	0.096	0.219	0.00778571	NA	NA	NA	NA	NA	NA	NA	0.00207143	0.134	NA	NA	NA	NA	93001	123706	730908	81	125433
chr10	125637580	125651330	ENST00000241305	-	ENSG00000121898	CPXM2	protein_coding	1375	0.494327	0.000218182	0.00174545	0.00618182	0.0088	0.0362909	0.00690909	0.0064	0.000654545	0.0136	0.110618	0.00196364	0.0414545	NA	NA	NA	NA	NA	NA	0.0205091	0.0890182	NA	NA	NA	NA	843019	434541	686444	499010	146178
chr10	15399311	15413061	ENST00000455654	-	ENSG00000148468	FAM171A1	protein_coding	1375	0.445455	7.27273e-05	NA	NA	0.00785455	0.0271273	0.00167273	0.00385455	NA	NA	0.0576727	0.00894545	0.116582	NA	NA	NA	NA	NA	NA	0.0064	0.169891	NA	NA	NA	NA	162366	407113	226805	1065905	122423
chr10	17686124	17699874	ENST00000377524	+	ENSG00000136738	STAM	protein_coding	1375	0.397745	7.27273e-05	0.00167273	0.00356364	NA	0.0274909	0.0138909	0.00676364	NA	0.0393455	0.211636	0.00196364	0.114691	NA	NA	NA	NA	NA	NA	0.00385455	0.145964	NA	NA	NA	NA	1222188	406532	1108139	26751	71789
chr10	28021239	28034989	ENST00000375790	-	ENSG00000150051	MKX	protein_coding	1375	0.452218	0.000509091	0.00174545	0.00603636	0.00676364	0.0402182	0.00756364	0.00465455	NA	0.0127273	0.048	0.0162909	NA	NA	NA	NA	NA	NA	NA	0.00370909	0.0401455	NA	NA	NA	NA	463921	66107	165890	786432	73186
chr10	35090503	35104253	ENST00000545260	-	ENSG00000148498	PARD3	protein_coding	1375	0.458036	7.27273e-05	0.00523636	NA	0.0048	0.0226909	0.00501818	0.00974545	NA	0.0235636	0.0376727	0.0102545	NA	NA	NA	NA	NA	NA	NA	0.00996364	0.197091	NA	NA	NA	NA	1440420	193225	2200761	311547	705765
chr10	88854953	88868703	ENST00000298784	+	ENSG00000122376	FAM35A	protein_coding	1375	0.424873	0.000145455	0.00167273	0.0016	0.0016	0.0391273	0.00152727	0.0119273	0.000654545	NA	0.133309	0.00472727	0.0337455	NA	NA	NA	NA	NA	NA	0.00254545	0.412727	NA	NA	NA	NA	369269	84993	617921	177	96267
chr1	117910071	117923821	ENST00000356554	+	ENSG00000198162	MAN1A2	protein_coding	1375	0.361455	7.27273e-05	0.00363636	0.00370909	0.00138182	0.0348364	0.0202909	0.00603636	NA	0.0465455	0.166327	0.00749091	0.0248	NA	NA	NA	NA	NA	NA	0.00836364	0.120582	NA	NA	NA	NA	198532	264580	456035	245660	161423
chr11	19734881	19748631	ENST00000396085	+	ENSG00000166833	NAV2	protein_coding	1375	0.464145	7.27273e-05	0.00341818	0.00138182	0.00785455	0.0234182	0.0032	0.00349091	NA	0.0116364	0.0886545	0.00749091	NA	NA	NA	NA	NA	NA	NA	0.00821818	0.184873	NA	NA	0.00370909	NA	610349	536914	2869197	472374	408263
chr11	58657938	58671688	ENST00000533636	-	ENSG00000156689	GLYATL2	protein_coding	1375	0.413382	0.000290909	0.0133091	0.00152727	0.00516364	0.0274909	0.0141091	0.00676364	NA	0.0354909	0.102764	NA	0.103564	NA	NA	NA	NA	NA	NA	0.00494545	0.0811636	NA	NA	NA	NA	19691	670182	238483	202969	69485
chr11	63425631	63439381	ENST00000538786	-	ENSG00000184743	ATL3	protein_coding	1375	0.457964	0.000363636	0.00327273	0.00341818	0.00283636	0.0345455	0.0128	0.0152727	NA	0.0398545	0.0508364	0.00145455	0.0136	NA	NA	NA	NA	NA	NA	0.00647273	0.412436	NA	NA	NA	NA	17440	87982	743026	9540	42656
chr1	179185069	179198819	ENST00000392043	-	ENSG00000143322	ABL2	protein_coding	1375	0.4448	0.000218182	0.0016	0.00589091	0.00414545	0.0164364	NA	0.0138182	0.000945455	0.0258182	0.0228364	0.00385455	NA	NA	NA	NA	NA	NA	NA	0.00669091	0.4008	NA	NA	NA	NA	1095691	610282	93690	64197	119103
chr1	186330707	186344457	ENST00000367478	-	ENSG00000047410	TPR	protein_coding	1375	0.354764	0.000654545	0.00174545	NA	NA	0.0384727	NA	0.00450909	0.00210909	0.197891	0.1192	0.0104727	NA	NA	NA	NA	0.00647273	NA	NA	NA	0.101164	NA	NA	NA	NA	1017996	296486	1043544	432	61503
chr11	8819363	8833113	ENST00000527473	-	ENSG00000166444	ST5	protein_coding	1375	0.478473	0.000218182	0.00167273	0.00312727	NA	0.0272	0.0096	0.00763636	0.00145455	NA	0.0379636	NA	NA	NA	NA	NA	NA	NA	NA	0.0119273	0.241091	NA	NA	NA	NA	112730	135726	81694	99587	80526
chr11	93394805	93408555	ENST00000325212	+	ENSG00000166004	KIAA1731	protein_coding	1375	0.372727	0.000363636	0.00341818	NA	NA	0.0288	0.0151273	0.00552727	0.000654545	0.0284364	0.118255	0.00669091	0.0233455	NA	NA	NA	NA	NA	NA	0.00203636	0.197891	NA	NA	NA	NA	19874	6354929	28875	118259	68717
chr12	100660918	100674668	ENST00000549687	+	ENSG00000136021	SCYL2	protein_coding	1375	0.378982	7.27273e-05	0.00174545	0.00378182	0.00174545	0.0335273	0.00916364	0.0056	NA	0.105527	0.354982	0.00952727	NA	NA	NA	NA	NA	NA	NA	0.00152727	0.117164	NA	NA	NA	NA	266570	42717	1085984	124276	70264
chr12	105501492	105515242	ENST00000332180	+	ENSG00000136051	KIAA1033	protein_coding	1375	0.352727	0.000654545	0.00989091	0.00385455	0.0056	0.0518545	NA	0.00341818	NA	0.00429091	0.155564	0.00669091	0.0325091	NA	NA	NA	NA	NA	NA	0.00385455	0.0728727	NA	NA	NA	NA	182921	112987	25582	23151	61420
chr12	121328424	121342174	ENST00000353487	-	ENSG00000157837	SPPL3	protein_coding	1375	0.440873	0.000290909	0.00363636	NA	0.00152727	0.0326545	0.0110545	0.0119273	NA	NA	0.0931636	0.00756364	NA	NA	NA	NA	NA	NA	NA	0.00778182	0.302836	NA	NA	NA	NA	282973	98673	124363	305489	141861
chr1	229680692	229694442	ENST00000344517	-	ENSG00000135776	ABCB10	protein_coding	1375	0.459709	0.000290909	0.00334545	NA	NA	0.0344727	0.0101818	0.00996364	0.00145455	0.0832727	0.0376	0.00210909	0.0119273	NA	NA	NA	0.00865455	NA	NA	NA	0.216873	NA	NA	NA	NA	10354	34423	213192	67538	42113
chr12	4758273	4772023	ENST00000266544	+	ENSG00000139180	NDUFA9	protein_coding	1375	0.388073	0.000581818	0.00174545	0.00203636	0.00225455	0.0326545	0.0119273	0.00472727	NA	0.0696	0.255055	0.0100364	NA	NA	NA	NA	NA	NA	NA	NA	0.0586182	NA	NA	NA	NA	743006	35232	1639649	110636	40181
chr12	51984050	51997800	ENST00000546961	+	ENSG00000196876	SCN8A	protein_coding	1375	0.416073	0.000218182	0.00181818	NA	0.00705455	0.0203636	0.00370909	0.00574545	0.0008	NA	0.120945	0.0195636	NA	NA	NA	NA	NA	NA	NA	0.00843636	0.0394909	NA	NA	NA	NA	277151	81070	538729	198850	72554
chr12	57811038	57824788	ENST00000347140	-	ENSG00000179912	R3HDM2	protein_coding	1375	0.4672	7.27273e-05	0.00196364	0.00174545	0.00145455	0.0168727	0.00305455	0.0122909	NA	NA	0.123345	0.0201455	0.0152727	NA	NA	NA	NA	NA	NA	0.00152727	0.475055	0.00269091	NA	NA	NA	80542	85582	156070	56947	177241
chr12	77157368	77171118	ENST00000426126	+	ENSG00000186908	ZDHHC17	protein_coding	1375	0.403127	0.000218182	NA	0.00312727	0.00225455	0.0330909	0.00967273	0.008	NA	0.0714182	0.0821818	0.00858182	0.0141818	NA	NA	NA	NA	NA	NA	0.00909091	0.288727	NA	NA	NA	NA	1027700	1261652	55127	203779	90108
chr12	96588160	96601910	ENST00000228741	+	ENSG00000111145	ELK3	protein_coding	1375	0.435927	0.000145455	0.00174545	0.00174545	0.00436364	0.0253091	0.00807273	0.00734545	0.000727273	0.0136727	0.0618909	NA	NA	NA	NA	NA	NA	NA	NA	0.00763636	0.166836	NA	NA	NA	NA	672840	327922	43878	158795	75453
chr13	46613144	46626894	ENST00000282007	-	ENSG00000123200	ZC3H13	protein_coding	1375	0.3432	0.000363636	0.00174545	0.00494545	NA	0.0417455	0.0138182	0.00654545	NA	0.0351273	0.116509	0.00530909	NA	NA	NA	NA	NA	NA	NA	0.00138182	0.0692364	NA	NA	NA	NA	594378	718496	476061	500401	90580
chr1	36273773	36287523	ENST00000373210	+	ENSG00000134698	EIF2C4	protein_coding	1375	0.424582	0.000145455	0.00167273	NA	0.00305455	0.0269091	NA	0.0136727	NA	0.0323636	0.1672	0.0167273	0.00370909	NA	NA	NA	NA	NA	NA	0.0114909	0.329745	NA	NA	NA	0.0048	35036	241393	288399	38222	49718
chr13	99725129	99738879	ENST00000427887	-	ENSG00000088387	DOCK9	protein_coding	1375	0.451564	7.27273e-05	0.00523636	0.00676364	0.004	0.0446545	0.00887273	0.00938182	NA	0.103564	0.0377455	0.00567273	0.111345	NA	NA	NA	NA	NA	NA	0.0154909	0.160436	NA	NA	NA	NA	469483	1443538	596856	113799	164574
chr1	40335433	40349183	ENST00000495175	-	ENSG00000043514	TRIT1	protein_coding	1375	0.428945	0.000218182	NA	NA	0.00189091	0.028	0.00429091	0.0107636	NA	0.0150545	0.208145	0.004	0.00276364	0.0556364	NA	NA	NA	NA	0.00792727	0.00836364	0.353309	NA	NA	NA	NA	266662	189198	79597	71600	41903
chr14	32546173	32559923	ENST00000556611	+	ENSG00000100852	ARHGAP5	protein_coding	1375	0.375782	0.000290909	0.00901818	0.00174545	0.00130909	0.0325091	0.0162909	0.00407273	NA	0.0533091	0.0513455	0.0128	NA	NA	NA	NA	NA	NA	NA	0.0024	0.0792727	NA	NA	NA	NA	212305	215744	2315970	619493	78044
chr14	58765103	58778853	ENST00000355431	+	ENSG00000032219	ARID4A	protein_coding	1375	0.390836	0.000436364	0.00523636	0.00341818	0.00538182	0.0405818	0.00705455	0.00690909	NA	0.0248	0.147782	0.00909091	NA	NA	NA	NA	NA	NA	NA	0.00232727	0.1688	NA	NA	NA	NA	88999	26376	70266	248	75348
chr14	69864732	69878482	ENST00000556125	+	ENSG00000029364	SLC39A9	protein_coding	1375	0.407127	0.000218182	NA	0.00138182	NA	0.0231273	0.00734545	0.0107636	NA	0.0557091	0.0153455	NA	0.0375273	NA	NA	NA	NA	NA	NA	0.0072	0.264364	NA	NA	NA	NA	173577	153995	887065	244818	55285
chr14	74551499	74565249	ENST00000555028	+	ENSG00000205659	LIN52	protein_coding	1375	0.429382	0.000290909	NA	0.00509091	0.00218182	0.0448	0.00792727	0.0112727	NA	0.0133818	0.116509	0.00647273	0.0150545	NA	NA	NA	NA	NA	0.0107636	0.00174545	0.472436	NA	NA	NA	NA	368950	121686	160480	303	116437
chr14	75230069	75243819	ENST00000552421	+	ENSG00000119596	YLPM1	protein_coding	1375	0.432291	7.27273e-05	0.00523636	0.00429091	0.00152727	0.0319273	0.0101091	0.0165091	NA	0.0950545	0.178109	NA	NA	NA	NA	NA	NA	NA	NA	0.00138182	0.311636	NA	NA	NA	NA	78524	26679	100587	50262	72824
chr14	89290968	89304718	ENST00000345383	+	ENSG00000165533	TTC8	protein_coding	1375	0.390545	0.000363636	NA	NA	NA	0.0261818	0.00414545	0.00938182	0.000654545	0.0184727	0.0382545	0.00814545	0.0391273	NA	NA	NA	NA	NA	NA	NA	0.107345	NA	NA	NA	NA	1091277	211115	291547	31872	53367
chr15	100105622	100119372	ENST00000560493	+	ENSG00000068305	MEF2A	protein_coding	1375	0.398109	0.000218182	0.00363636	0.00138182	0.00392727	0.0509818	0.0130182	0.00334545	0.00167273	0.076	0.1808	0.0203636	NA	NA	NA	NA	NA	NA	NA	0.0145455	0.0821818	NA	NA	NA	NA	997132	179124	121989	315807	80344
chr1	52082547	52096297	ENST00000337809	+	ENSG00000117859	OSBPL9	protein_coding	1375	0.4072	7.27273e-05	0.00327273	0.00167273	0.00341818	0.0287273	NA	0.00952727	NA	0.028	0.223855	0.0119273	0.0769455	NA	NA	NA	NA	NA	NA	0.00196364	0.230764	NA	NA	NA	NA	399309	343428	132318	97552	172342
chr15	31619058	31632808	ENST00000307145	+	ENSG00000169926	KLF13	protein_coding	1375	0.552509	0.000145455	0.00181818	0.00276364	0.0135273	0.0363636	0.0104727	0.00232727	0.0016	0.0245818	0.0442182	0.0217455	NA	NA	NA	NA	NA	NA	NA	0.00843636	0.0457455	NA	NA	NA	NA	1248632	383748	1398688	335251	51044
chr15	34317627	34331377	ENST00000306730	-	ENSG00000169857	AVEN	protein_coding	1375	0.419927	7.27273e-05	NA	0.00152727	0.00189091	0.0330909	0.00181818	0.0106909	0.00145455	0.0766545	0.1048	0.00538182	NA	NA	NA	NA	NA	NA	NA	0.00814545	0.275927	NA	NA	NA	NA	931292	44846	1264507	62896	172949
chr15	41624892	41638642	ENST00000260359	+	ENSG00000137804	NUSAP1	protein_coding	1375	0.439491	0.000363636	NA	0.00603636	0.0032	0.0397818	0.00552727	0.0125818	NA	0.00625455	0.283491	0.00596364	NA	NA	NA	NA	NA	NA	NA	0.0142545	0.418982	NA	NA	NA	NA	44409	50809	14658	73	48356
chr15	44119161	44132911	ENST00000263795	+	ENSG00000092470	WDR76	protein_coding	1375	0.422982	0.000363636	NA	NA	0.00567273	0.0397818	0.00661818	0.0125091	NA	0.0132364	0.107055	0.00196364	NA	NA	NA	NA	NA	NA	NA	0.00269091	0.492	NA	NA	NA	NA	421747	24392	6568	2210	41456
chr15	50633855	50647605	ENST00000380877	-	ENSG00000104064	GABPB1	protein_coding	1375	0.425455	0.000290909	0.00378182	0.00727273	0.00414545	0.0420364	0.0106909	0.00836364	NA	0.0462545	0.106691	0.0115636	0.0306909	NA	NA	NA	NA	NA	NA	0.00392727	0.260073	0.00756364	NA	NA	NA	1159751	201746	670272	4920	78216
chr15	50965262	50979012	ENST00000313478	-	ENSG00000092439	TRPM7	protein_coding	1375	0.435273	7.27273e-05	NA	0.00523636	0.004	0.0275636	NA	0.0135273	NA	0.0147636	0.174327	0.000436364	0.0276364	NA	NA	NA	NA	NA	NA	0.00989091	0.416655	NA	NA	NA	NA	291407	20724	145735	221856	126520
chr1	55667289	55681039	ENST00000294383	-	ENSG00000162402	USP24	protein_coding	1375	0.399055	7.27273e-05	0.00378182	0.00145455	0.004	0.0385455	0.00363636	0.00581818	0.0008	0.0857455	0.0290909	0.008	NA	NA	NA	NA	NA	NA	NA	0.00283636	0.1176	NA	NA	NA	NA	288118	1279379	432711	41	149007
chr15	57012534	57026284	ENST00000396245	-	ENSG00000137871	ZNF280D	protein_coding	1375	0.398473	0.000290909	0.00349091	0.00152727	0.00298182	0.0560727	0.0312	0.00974545	NA	0.329891	0.115709	0.00167273	0.0381818	NA	NA	NA	NA	NA	NA	0.00254545	0.110909	NA	NA	NA	NA	228949	1862225	1338438	184548	79340
chr15	85246197	85259947	ENST00000268220	-	ENSG00000140612	SEC11A	protein_coding	1375	0.443636	0.000145455	NA	0.004	0.0016	0.0242182	0.00734545	0.00647273	NA	0.00923636	0.0434909	0.00290909	0.191927	NA	NA	NA	NA	NA	NA	0.00530909	0.369236	NA	NA	NA	NA	18145	1042611	34253	31870	47172
chr16	15528152	15541902	ENST00000300006	+	ENSG00000166780	C16orf45	protein_coding	1375	0.456145	0.000145455	0.00174545	0.00836364	0.00814545	0.0189818	0.00181818	0.00603636	0.000872727	NA	0.120218	0.0072	0.0277091	NA	NA	NA	NA	NA	NA	0.00218182	0.396436	NA	NA	NA	NA	168971	396600	120073	339994	153964
chr16	31885079	31898829	ENST00000300870	+	ENSG00000185947	ZNF267	protein_coding	1375	0.417091	0.000363636	0.00516364	0.00174545	0.00174545	0.0362182	NA	0.00414545	NA	0.0538182	0.0403636	0.00749091	0.1864	NA	NA	NA	NA	NA	NA	NA	0.0756364	NA	NA	NA	NA	14798478	112193	2478722	304234	43589
chr17	40526699	40540449	ENST00000389272	-	ENSG00000168610	STAT3	protein_coding	1375	0.448145	7.27273e-05	NA	NA	0.0032	0.0179636	NA	0.012	0.000727273	0.0169455	0.0338182	0.00538182	NA	NA	NA	NA	NA	NA	NA	NA	0.408291	NA	NA	NA	NA	72025	14017	36489	70412	72963
chr17	5185558	5199308	ENST00000408982	+	ENSG00000029725	RABEP1	protein_coding	1375	0.4304	0.000145455	0.00283636	NA	0.00807273	0.0327273	0.0112	0.0142545	0.000654545	0.0192727	0.207273	0.0229091	0.0161455	NA	NA	NA	NA	NA	NA	0.00232727	0.385382	NA	NA	NA	NA	97402	46627	63787	90380	103571
chr17	57218880	57232630	ENST00000330137	-	ENSG00000182628	SKA2	protein_coding	1375	0.416655	0.000218182	0.00254545	NA	0.00305455	0.0377455	0.00509091	0.0115636	NA	NA	0.137382	0.00414545	0.0133091	NA	NA	NA	NA	NA	NA	0.00727273	0.387564	NA	NA	NA	NA	8364	542036	380938	229	45318
chr17	61851223	61864973	ENST00000578681	+	ENSG00000198231	DDX42	protein_coding	1375	0.438545	0.000363636	NA	0.00363636	0.00516364	0.0296	0.0152	0.00603636	NA	NA	0.112873	0.00298182	NA	NA	NA	NA	NA	NA	NA	0.00654545	0.316291	NA	NA	NA	NA	13546	77553	5569	135	45454
chr17	65228355	65242105	ENST00000581159	-	ENSG00000198265	HELZ	protein_coding	1375	0.432	0.000436364	0.00174545	0.00276364	0.00843636	0.0377455	NA	0.00829091	0.000654545	NA	0.0509091	0.0192	NA	NA	NA	NA	NA	NA	NA	0.0114182	0.283345	NA	NA	NA	NA	1013893	94513	395243	131818	42609
chr17	74435538	74449288	ENST00000319380	-	ENSG00000175931	UBE2O	protein_coding	1375	0.480218	7.27273e-05	0.00683636	NA	0.0088	0.0195636	0.00152727	0.00756364	0.00196364	0.0407273	0.0398545	0.00872727	NA	NA	NA	NA	NA	NA	NA	0.00967273	0.195855	NA	NA	NA	NA	59058	17686	25347	104557	63674
chr18	59547242	59560992	ENST00000312828	-	ENSG00000176641	RNF152	protein_coding	1375	0.429673	0.000218182	0.00341818	0.00254545	0.0056	0.0173091	NA	0.00792727	0.000654545	0.0578182	0.00698182	NA	0.0265455	NA	NA	NA	NA	NA	NA	0.00698182	0.105236	NA	NA	NA	NA	2156348	150465	1949454	293531	85696
chr19	12391899	12405649	ENST00000397742	-	ENSG00000197857	ZNF44	protein_coding	1375	0.456436	0.000290909	0.00167273	0.00341818	0.00298182	0.0208727	0.00283636	0.00872727	NA	0.00901818	0.1168	0.00152727	0.165236	NA	NA	NA	NA	NA	NA	0.00690909	0.361745	NA	NA	NA	NA	98103	22654	65585	316082	46431
chr19	31826703	31840453	ENST00000240587	-	ENSG00000121297	TSHZ3	protein_coding	1375	0.454182	0.000218182	0.00698182	NA	0.00989091	0.0379636	0.00334545	0.0122182	0.000654545	NA	NA	0.0203636	NA	NA	NA	NA	NA	NA	NA	0.0298182	NA	NA	NA	NA	NA	1594001	1247453	1293840	996060	74602
chr19	39833108	39846858	ENST00000314471	+	ENSG00000179134	SAMD4B	protein_coding	1375	0.471782	0.000290909	0.00174545	0.00392727	0.00705455	0.0273455	0.0103273	0.00829091	0.000654545	0.0491636	0.156145	0.00676364	0.0493091	NA	NA	NA	NA	NA	NA	0.00356364	0.184945	NA	NA	NA	NA	8854	163062	3161	366728	42427
chr19	47634080	47647830	ENST00000270225	+	ENSG00000142230	SAE1	protein_coding	1375	0.484655	0.000290909	0.00181818	0.00589091	0.00203636	0.0202182	0.0226182	0.0128727	0.000654545	0.0354182	0.174545	NA	NA	NA	NA	NA	NA	NA	NA	0.00341818	0.558036	NA	NA	NA	NA	85650	125747	49998	17071	79812
chr20	30297953	30311703	ENST00000450273	-	ENSG00000171552	BCL2L1	protein_coding	1375	0.487855	0.000436364	0.00167273	0.00232727	0.00334545	0.0346909	0.0072	0.00429091	0.00138182	NA	0.0593455	NA	0.0370909	NA	NA	NA	NA	NA	NA	NA	0.150109	NA	NA	NA	NA	4081834	221054	76660	15200	57865
chr20	48429250	48443000	ENST00000417961	+	ENSG00000197818	SLC9A8	protein_coding	1375	0.4256	0.000218182	0.00189091	0.00138182	0.00356364	0.0472727	NA	0.00756364	0.000654545	0.0279273	0.132291	0.0115636	0.0698909	NA	NA	NA	NA	NA	NA	0.0016	0.2616	NA	NA	NA	NA	83663	531941	50678	98829	79522
chr20	56884752	56898502	ENST00000244040	+	ENSG00000124209	RAB22A	protein_coding	1375	0.439273	0.000145455	0.00341818	0.00603636	0.0117091	0.0210909	NA	0.0105455	NA	0.0358545	0.155782	0.0016	NA	NA	NA	NA	NA	NA	NA	NA	0.267709	NA	NA	NA	NA	39422	886474	109673	257	57811
chr2	127413509	127427259	ENST00000259254	+	ENSG00000136732	GYPC	protein_coding	1375	0.509673	0.000145455	NA	0.00341818	0.00858182	0.0204364	0.00749091	0.00334545	0.00174545	0.0444364	0.0470545	NA	NA	NA	NA	NA	NA	NA	NA	0.0158545	0.175127	NA	NA	NA	NA	1005087	4888081	352089	4919006	40737
chr2	131862420	131876170	ENST00000409158	+	ENSG00000115762	PLEKHB2	protein_coding	1375	0.450182	0.000145455	NA	0.00610909	0.00574545	0.0217455	0.00138182	0.00734545	NA	0.0144	0.163709	0.0056	0.172436	NA	NA	NA	NA	NA	NA	NA	0.267782	NA	NA	NA	NA	347965	729438	339112	11416	42950
chr2	201980827	201994577	ENST00000309955	+	ENSG00000003402	CFLAR	protein_coding	1375	0.446691	0.000509091	NA	0.00567273	0.00363636	0.0250182	0.0233455	0.00210909	0.000654545	0.0202182	0.0604364	0.00196364	0.0840727	NA	NA	NA	NA	NA	NA	0.00545455	0.0741091	NA	NA	NA	NA	26793	30354	132319	44435	48206
chr2	202671098	202684848	ENST00000260967	+	ENSG00000138395	CDK15	protein_coding	1375	0.391345	0.000436364	NA	NA	0.00189091	0.0232	0.0131636	0.0096	NA	NA	0.243564	0.00167273	0.0353455	NA	NA	NA	NA	NA	0.00698182	0.00501818	0.157745	NA	NA	NA	NA	188211	325524	359804	25203	87169
chr22	18560781	18574531	ENST00000474897	+	ENSG00000215193	PEX26	protein_coding	1375	0.481236	0.000436364	NA	0.00356364	0.00938182	0.0311273	0.0150545	0.0048	NA	NA	0.202255	0.00414545	NA	NA	NA	NA	NA	NA	NA	0.00829091	0.234691	NA	NA	NA	NA	31976	348792	423013	53456	53124
chr2	224890286	224904036	ENST00000258405	-	ENSG00000135919	SERPINE2	protein_coding	1375	0.4592	0.000363636	0.00356364	0.00414545	0.00472727	0.0310545	0.00749091	0.00378182	0.000654545	0.0594182	0.0937455	0.00465455	0.0309091	NA	NA	NA	NA	NA	NA	NA	0.0821091	NA	NA	NA	NA	53984	430832	31605	2796634	64207
chr2	231280657	231294407	ENST00000264052	+	ENSG00000067066	SP100	protein_coding	1375	0.371273	0.000218182	0.00349091	0.00152727	0.00567273	0.0357091	0.0103273	0.00581818	0.0008	0.0494545	0.599564	0.00218182	0.0404364	NA	NA	NA	NA	NA	NA	0.00167273	0.0866909	NA	NA	NA	NA	256899	12212	998801	190213	100585
chr2	236402733	236416483	ENST00000409457	+	ENSG00000157985	AGAP1	protein_coding	1375	0.519418	0.000218182	0.00189091	0.00174545	0.00698182	0.0333818	0.00305455	0.00996364	0.0032	0.0128	0.0253091	0.0146182	0.0317091	NA	NA	NA	NA	NA	NA	0.00872727	0.145818	NA	NA	NA	NA	1551350	438375	631573	997040	359113
chr2	239183500	239197250	ENST00000254657	-	ENSG00000132326	PER2	protein_coding	1375	0.520509	0.000436364	NA	0.0168727	0.0127273	0.0514182	0.00821818	0.00407273	0.00145455	0.0374545	0.168	NA	0.0460364	NA	NA	NA	NA	NA	NA	NA	0.111636	NA	NA	NA	NA	8569	772613	149196	31934	44571
chr22	40573929	40587679	ENST00000454349	+	ENSG00000100354	TNRC6B	protein_coding	1375	0.413236	7.27273e-05	NA	0.00181818	NA	0.0418182	0.00887273	0.00378182	0.000727273	0.0624	0.100218	0.00523636	NA	NA	NA	NA	NA	NA	NA	NA	0.159709	NA	NA	NA	NA	128574	655238	192362	645069	157882
chr2	44209394	44223144	ENST00000260665	-	ENSG00000138095	LRPPRC	protein_coding	1375	0.4128	0.000145455	0.00167273	0.00385455	NA	0.0307636	0.00509091	0.00821818	NA	0.00552727	0.123709	NA	NA	NA	NA	NA	NA	NA	NA	NA	0.213891	NA	NA	NA	NA	359959	321603	145995	172855	109497
chr2	58273729	58287479	ENST00000412104	+	ENSG00000028116	VRK2	protein_coding	1375	0.364945	0.000363636	0.00603636	0.00283636	NA	0.0508364	0.0112	0.00647273	NA	0.0313455	0.0032	0.00421818	NA	NA	NA	NA	NA	NA	NA	0.00138182	0.0725091	NA	NA	NA	0.0300364	2669635	1660420	72648	2122431	113326
chr2	88913344	88927094	ENST00000303236	-	ENSG00000172071	EIF2AK3	protein_coding	1375	0.435055	0.000290909	0.00712727	NA	0.00341818	0.04	0.00443636	0.00581818	NA	0.0392727	0.132945	0.00596364	0.0239273	NA	NA	NA	NA	NA	NA	0.0184	0.150109	NA	NA	NA	NA	531846	6825857	400938	64081	70833
chr3	119799514	119813264	ENST00000264235	-	ENSG00000082701	GSK3B	protein_coding	1375	0.382255	7.27273e-05	0.00174545	0.00843636	NA	0.0278545	0.0141091	0.0112727	0.00152727	0.0248727	0.0813818	0.0105455	NA	NA	NA	NA	NA	NA	NA	0.00167273	0.140655	NA	NA	NA	NA	377021	230311	530139	501863	273094
chr3	123589428	123603178	ENST00000360772	-	ENSG00000065534	MYLK	protein_coding	1375	0.431491	0.000145455	0.00174545	0.00407273	0.00661818	0.0355636	0.0048	0.00130909	NA	0.0754909	0.266691	0.00349091	0.0605091	NA	NA	NA	NA	NA	NA	NA	0.0785455	NA	NA	NA	NA	259254	29095	570196	210379	274282
chr3	131208077	131221827	ENST00000511168	-	ENSG00000114686	MRPL3	protein_coding	1375	0.378618	0.000436364	0.00174545	0.00698182	NA	0.0361455	0.00916364	0.00370909	0.000654545	0.0781818	0.192364	0.00247273	NA	NA	NA	NA	NA	NA	NA	0.00305455	0.0858182	NA	NA	NA	NA	81508	1055154	74153	914725	40547
chr3	14444076	14457826	ENST00000454876	+	ENSG00000131389	SLC6A6	protein_coding	1375	0.525745	0.000145455	NA	0.00967273	0.0131636	0.0341091	0.00261818	0.00770909	0.0016	0.0275636	0.0992727	0.00189091	0.0362909	NA	NA	NA	NA	NA	NA	0.0253818	0.185455	NA	NA	NA	NA	209176	204207	605942	223904	86781
chr3	179370543	179384293	ENST00000263966	+	ENSG00000058056	USP13	protein_coding	1375	0.462691	0.000145455	0.00174545	0.00152727	0.00749091	0.0347636	0.0165818	0.00778182	NA	0.0328	0.187636	0.0165818	0.0704727	NA	NA	NA	NA	NA	NA	0.00203636	0.215273	NA	NA	NA	NA	909374	28255	1290954	48109	136646
chr3	29322473	29336223	ENST00000434693	+	ENSG00000144642	RBMS3	protein_coding	1375	0.359491	0.000145455	0.00181818	0.00785455	NA	0.0253818	0.0106909	0.00581818	NA	0.0293091	NA	0.0230545	NA	NA	NA	NA	NA	NA	NA	0.00523636	NA	NA	NA	NA	NA	1285520	961210	2339843	931855	724147
chr3	33124972	33138722	ENST00000307363	-	ENSG00000170266	GLB1	protein_coding	1375	0.441964	0.000218182	0.00334545	0.00210909	0.00305455	0.0384727	0.0131636	0.00872727	NA	0.0282909	0.206036	0.00567273	NA	NA	NA	NA	NA	NA	NA	0.00669091	0.128727	NA	NA	NA	NA	486356	291106	283368	16727	100610
chr3	49810225	49823975	ENST00000460540	-	ENSG00000176095	IP6K1	protein_coding	1375	0.463127	0.000290909	NA	NA	0.00581818	0.0420364	0.00305455	0.00734545	0.0008	0.0453818	0.0603636	NA	NA	NA	NA	NA	NA	NA	NA	0.00596364	0.4824	NA	NA	NA	NA	22591	18662	25013	16711	59514
chr3	57261765	57275515	ENST00000288266	+	ENSG00000157500	APPL1	protein_coding	1375	0.402255	0.000436364	0.00370909	NA	0.00349091	0.0536	0.00618182	0.0113455	NA	0.0512727	0.145673	0.00603636	0.0261091	NA	NA	NA	NA	NA	NA	0.00181818	0.245818	NA	NA	NA	NA	240215	605917	255324	544630	45731
chr3	72883881	72897631	ENST00000325599	-	ENSG00000144736	SHQ1	protein_coding	1375	0.409164	0.000363636	0.00523636	0.00494545	0.00152727	0.0397818	0.00647273	0.00996364	0.000654545	0.0728727	0.117745	0.004	0.0307636	NA	NA	NA	NA	NA	NA	NA	0.223491	NA	NA	NA	NA	361857	534020	2840143	148487	99201
chr4	107224111	107237861	ENST00000432496	-	ENSG00000145348	TBCK	protein_coding	1375	0.371491	0.000581818	0.004	0.00647273	NA	0.0260364	0.0133818	0.00763636	NA	0.0192	0.192364	0.0016	0.127055	NA	NA	NA	NA	NA	NA	0.00334545	0.0959273	NA	NA	NA	NA	567980	1296960	428979	1507859	270628
chr4	120133791	120147541	ENST00000274030	+	ENSG00000145390	USP53	protein_coding	1375	0.363127	0.000363636	0.00734545	NA	NA	0.0208727	0.00458182	0.00858182	NA	0.0432	0.232073	0.0133818	0.0965091	NA	NA	NA	NA	NA	NA	0.00443636	0.0873455	NA	NA	NA	NA	202146	151389	43782	376465	82021
chr4	13615597	13629347	ENST00000040738	-	ENSG00000038219	BOD1L1	protein_coding	1375	0.407927	0.000363636	0.00167273	0.00494545	0.00436364	0.0337455	0.0178909	0.00887273	NA	0.0582545	0.0998545	0.00749091	NA	NA	NA	NA	NA	NA	NA	0.0088	0.109018	NA	NA	NA	NA	103358	1976659	5111065	484244	58985
chr4	141663524	141677274	ENST00000442267	-	ENSG00000109436	TBC1D9	protein_coding	1375	0.384727	7.27273e-05	0.00341818	0.00501818	0.00116364	0.0282909	0.0122182	0.00858182	NA	0.0463273	0.292145	0.00705455	0.0749091	NA	NA	NA	NA	NA	NA	0.00792727	0.138327	NA	NA	NA	NA	562041	109450	162350	464774	135355
chr4	146005943	146019693	ENST00000514390	-	ENSG00000164162	ANAPC10	protein_coding	1375	0.388509	0.000436364	0.00174545	0.00698182	0.00261818	0.0250182	0.00603636	0.00567273	0.000654545	0.128582	0.264727	NA	0.0216	NA	NA	NA	NA	NA	NA	NA	0.1104	NA	NA	NA	NA	2212089	35108	1497080	383257	103086
chr4	3294755	3308505	ENST00000506631	+	ENSG00000159788	RGS12	protein_coding	1375	0.541745	7.27273e-05	NA	0.0168727	0.00850909	0.0370182	0.00843636	0.00574545	0.000654545	0.00778182	0.0465455	0.0208	0.1568	NA	NA	NA	NA	NA	NA	0.0181091	0.0799273	NA	NA	NA	NA	957168	36413	170568	329637	125091
chr4	37674248	37687998	ENST00000454158	-	ENSG00000181826	RELL1	protein_coding	1375	0.438691	7.27273e-05	NA	NA	0.00523636	0.0264727	NA	0.00625455	NA	0.0330909	0.0791273	NA	0.0340364	NA	NA	NA	NA	NA	NA	NA	0.246327	NA	NA	NA	NA	12485794	1137330	10620995	140283	73475
chr4	77870856	77884606	ENST00000264893	+	ENSG00000138758	SEPT11	protein_coding	1375	0.419782	0.000145455	0.00181818	0.00530909	0.0024	0.0202909	0.0104	0.00618182	0.000727273	0.0696727	0.0401455	0.00901818	0.0379636	NA	NA	NA	NA	NA	NA	0.00727273	0.028	NA	NA	NA	NA	167500	166451	58320	735804	88911
chr5	112244486	112258236	ENST00000379638	-	ENSG00000129625	REEP5	protein_coding	1375	0.4296	0.000218182	0.00356364	0.00152727	0.00174545	0.0379636	0.00989091	0.00225455	0.000654545	NA	0.0578182	0.0156364	0.0530182	NA	NA	NA	NA	NA	NA	0.00210909	0.179927	NA	NA	NA	NA	905608	2288290	36300	54170	46152
chr5	151151471	151165221	ENST00000394123	+	ENSG00000145907	G3BP1	protein_coding	1375	0.3944	0.000218182	0.00189091	0.00385455	0.00501818	0.0546182	0.00356364	0.00843636	0.00167273	0.0794182	0.212655	0.00770909	NA	NA	NA	NA	NA	NA	NA	NA	0.176218	NA	NA	NA	NA	2227047	279531	2179797	13261	40875
chr5	175875356	175889106	ENST00000261942	+	ENSG00000113194	FAF2	protein_coding	1375	0.425891	0.000290909	0.00167273	0.00392727	NA	0.0170182	0.00618182	0.0106182	NA	0.0332364	0.122545	0.00378182	NA	NA	NA	NA	NA	NA	NA	0.0171636	0.459273	NA	NA	NA	NA	159031	58605	38343	31816	61719
chr5	38845960	38859710	ENST00000502536	+	ENSG00000145623	OSMR	protein_coding	1375	0.418327	7.27273e-05	0.00167273	NA	0.00305455	0.0412364	0.00981818	0.00647273	NA	0.0349091	0.307345	0.0024	0.0314182	NA	NA	NA	NA	NA	NA	0.00385455	0.124873	NA	NA	NA	NA	1794071	1093186	52061	250453	40799
chr6	149853424	149867174	ENST00000253329	-	ENSG00000131013	PPIL4	protein_coding	1375	0.3968	0.000509091	0.00174545	0.00443636	NA	0.0284364	0.0189818	0.00930909	NA	0.171564	0.124436	0.00603636	0.0146182	NA	NA	NA	NA	NA	NA	0.00305455	0.250255	NA	NA	NA	NA	2702214	48836	94427	20353	41305
chr6	25279306	25293056	ENST00000461945	+	ENSG00000079691	LRRC16A	protein_coding	1375	0.427927	0.000290909	NA	NA	0.00472727	0.0328	0.0128727	0.00829091	NA	0.0226182	0.109018	0.00530909	NA	NA	NA	NA	NA	NA	0.0072	0.00261818	0.153382	NA	NA	NA	NA	643764	492981	697953	140686	173519
chr6	31368479	31382229	ENST00000414046	+	ENSG00000206337	HCP5	processed_transcript	1375	0.495127	0.000509091	NA	0.00625455	0.0203636	0.0283636	0.00654545	0.00581818	NA	0.0130182	0.198182	NA	NA	NA	NA	NA	NA	NA	0.00705455	0.00523636	0.064	NA	NA	NA	NA	57375	196734	89516	43490	65107
chr6	37225548	37239298	ENST00000373491	+	ENSG00000065491	TBC1D22B	protein_coding	1375	0.405309	0.000218182	0.00174545	0.00472727	NA	0.0251636	0.0248727	0.00254545	NA	NA	0.233818	NA	NA	NA	NA	NA	NA	NA	NA	0.0237818	0.268945	NA	NA	NA	NA	56199	82344	185148	271599	75198
chr7	107531609	107545359	ENST00000417551	+	ENSG00000091140	DLD	protein_coding	1375	0.378909	0.000509091	0.00167273	0.00341818	NA	0.0393455	0.00167273	0.00785455	NA	NA	0.123345	NA	NA	NA	NA	NA	NA	NA	NA	NA	0.240073	NA	NA	NA	NA	638579	129526	540461	326650	40566
chr7	121022638	121036388	ENST00000359943	-	ENSG00000196937	FAM3C	protein_coding	1375	0.376582	0.000145455	0.00501818	0.00516364	NA	0.0346909	0.0100364	0.00523636	NA	0.0494545	0.0435636	0.0138182	0.0849455	NA	NA	NA	NA	NA	NA	0.0121455	0.0498909	NA	NA	NA	NA	8237751	677209	58890	6192017	47483
chr7	129579039	129592789	ENST00000355621	-	ENSG00000186591	UBE2H	protein_coding	1375	0.447273	0.000218182	0.00174545	0.00254545	0.00429091	0.0221091	0.00305455	0.008	NA	0.00974545	0.0452364	0.00930909	NA	NA	NA	NA	NA	NA	NA	0.00378182	0.305673	NA	NA	NA	NA	857562	65336	155867	117559	122217
chr7	16671692	16685442	ENST00000306999	-	ENSG00000106524	ANKMY2	protein_coding	1375	0.3888	0.000218182	0.00421818	0.00138182	NA	0.0358545	0.00858182	0.008	0.000654545	0.0137455	0.155491	0.0108364	0.0705455	NA	NA	NA	NA	NA	NA	0.00501818	0.1448	NA	NA	NA	NA	184495	1144942	3914884	316	46041
chr7	77166592	77180342	ENST00000248594	+	ENSG00000127947	PTPN12	protein_coding	1375	0.411055	0.000290909	0.00174545	0.00530909	0.00487273	0.0483636	0.0190545	0.00523636	NA	0.0706182	0.136509	0.00930909	0.0236364	NA	NA	NA	NA	NA	NA	0.00683636	0.121818	NA	NA	NA	NA	119150	909293	106575	120875	102796
chr8	110332864	110346614	ENST00000239690	-	ENSG00000120526	NUDCD1	protein_coding	1375	0.377527	0.000290909	NA	0.00574545	0.00196364	0.0199273	NA	0.0113455	0.000654545	0.0248	0.337236	0.00843636	0.0472	NA	NA	NA	NA	NA	NA	NA	0.0788364	NA	NA	NA	NA	1045655	6074109	807478	205314	93466
chr8	53613247	53626997	ENST00000521611	-	ENSG00000023287	RB1CC1	protein_coding	1375	0.404073	7.27273e-05	0.00174545	NA	0.00181818	0.0522182	0.00843636	0.00763636	0.00145455	NA	0.0865455	0.00414545	NA	NA	NA	NA	NA	NA	NA	0.00298182	0.232436	NA	NA	NA	NA	775262	1001117	4612543	1137370	91108
chr8	92039542	92053292	ENST00000285419	-	ENSG00000155099	TMEM55A	protein_coding	1375	0.394618	7.27273e-05	0.00167273	0.00734545	NA	0.0250182	0.0251636	0.00770909	NA	NA	0.169382	0.0132364	0.175055	NA	NA	NA	NA	NA	NA	0.0104727	0.1104	NA	NA	NA	NA	15807	913902	949065	29131	47268
chr8	98787285	98801035	ENST00000445593	+	ENSG00000104341	LAPTM4B	protein_coding	1375	0.459636	7.27273e-05	0.00618182	0.00138182	0.00574545	0.0301818	0.00305455	0.0154182	0.000872727	NA	0.0674182	0.00545455	0.126982	NA	NA	NA	NA	NA	NA	0.00494545	0.391636	NA	NA	NA	NA	302235	44797	226652	1513489	77956
chr9	124030338	124044088	ENST00000449773	+	ENSG00000148180	GSN	protein_coding	1375	0.478836	0.000290909	NA	0.00334545	0.00981818	0.0424	0.0024	0.00669091	0.00181818	0.044	0.181091	0.00741818	0.0338182	NA	NA	NA	NA	NA	NA	NA	0.154327	NA	NA	NA	NA	259060	90452	31014	65973	44417
chr9	37800499	37814249	ENST00000377724	+	ENSG00000122741	DCAF10	protein_coding	1375	0.409236	0.000218182	0.00341818	0.00356364	0.00494545	0.0259636	0.00901818	0.00538182	NA	0.0317091	0.353818	0.00610909	NA	NA	NA	NA	NA	NA	NA	0.0297455	0.284873	NA	NA	NA	NA	552161	21530	37072	15432	62823
chr9	72361108	72374858	ENST00000340434	-	ENSG00000188647	PTAR1	protein_coding	1375	0.372	0.000218182	0.00363636	NA	0.00196364	0.0365091	0.00247273	0.00763636	NA	0.0368	0.0896	NA	NA	NA	NA	NA	NA	NA	NA	0.00443636	0.0905455	NA	NA	NA	NA	47583	393191	464734	283638	41804
chrX	122853156	122866906	ENST00000355725	-	ENSG00000125676	THOC2	protein_coding	1375	0.412291	7.27273e-05	NA	0.00363636	0.00167273	0.0273455	0.0237091	0.00690909	NA	0.0219636	0.188582	0.00901818	NA	NA	NA	NA	NA	NA	NA	NA	0.322545	NA	NA	NA	NA	3062901	5713571	202140	126755	122857
chrX	84258832	84272582	ENST00000373173	+	ENSG00000155008	APOOL	protein_coding	1375	0.387491	7.27273e-05	0.00189091	0.00407273	0.00392727	0.0289455	0.00392727	0.0088	0.000654545	0.00509091	0.714764	0.00152727	NA	NA	NA	NA	NA	NA	NA	0.00421818	0.0978182	NA	NA	NA	NA	11640829	3704786	817352	501345	84237
chr10	28821422	28834922	ENST00000375664	+	ENSG00000095787	WAC	protein_coding	1350	0.412296	0.000518519	NA	NA	0.00177778	0.0463704	0.00325926	0.0111852	0.000814815	0.0755556	0.0604444	0.0188889	NA	NA	NA	NA	NA	NA	NA	0.00266667	0.176148	NA	NA	NA	NA	105001	992323	884854	139	88506
chr10	5842012	5855512	ENST00000380191	-	ENSG00000057608	GDI2	protein_coding	1350	0.414	0.000222222	0.0017037	NA	0.00333333	0.0462222	0.0157037	0.0102222	NA	0.168222	0.0804444	NA	NA	NA	NA	NA	NA	NA	NA	0.00437037	0.246296	NA	NA	NA	NA	106954	48176	9809	76701	48326
chr10	70661034	70674534	ENST00000373585	+	ENSG00000107625	DDX50	protein_coding	1350	0.402222	0.000666667	0.00355556	0.00192593	NA	0.0406667	0.015037	0.00985185	NA	0.0234074	0.0754074	0.00740741	NA	NA	NA	NA	NA	NA	NA	0.00585185	0.312148	0.00762963	NA	NA	NA	14857	109725	1170988	373754	45569
chr10	89419370	89432870	ENST00000361175	+	ENSG00000198682	PAPSS2	protein_coding	1350	0.423259	0.000296296	NA	NA	0.002	0.018	0.01	0.00822222	NA	0.0233333	0.0662222	NA	NA	NA	NA	NA	NA	NA	NA	0.00733333	0.155926	NA	NA	NA	NA	163824	106152	53504	564594	88092
chr10	89564417	89577917	ENST00000541004	-	ENSG00000138138	ATAD1	protein_coding	1350	0.353037	0.000222222	0.00696296	0.0042963	NA	0.0222222	0.0203704	0.00837037	NA	0.0319259	0.183926	0.0111852	0.0371111	NA	NA	NA	NA	NA	NA	NA	0.0862963	NA	NA	NA	NA	683141	1116913	30455	45277	58405
chr10	89622870	89636370	ENST00000371953	+	ENSG00000171862	PTEN	protein_coding	1350	0.368148	0.000222222	0.00696296	0.00222222	0.00222222	0.0511111	0.0125185	0.00696296	NA	0.0276296	NA	0.0171111	NA	NA	NA	NA	NA	NA	NA	0.00548148	0.125185	NA	NA	NA	NA	977155	115408	1031960	44953	108817
chr10	97037281	97050781	ENST00000329399	-	ENSG00000107438	PDLIM1	protein_coding	1350	0.442444	7.40741e-05	0.00192593	0.00325926	0.00222222	0.0303704	0.00192593	0.00525926	0.000962963	0.0472593	0.10837	0.0111111	NA	NA	NA	NA	NA	NA	NA	0.00607407	0.198148	NA	NA	NA	NA	888098	314904	648925	752377	53452
chr10	99894387	99907887	ENST00000370584	+	ENSG00000166024	R3HCC1L	protein_coding	1350	0.392	7.40741e-05	0.00333333	NA	NA	0.0443704	0.00437037	0.00874074	NA	0.0521481	0.189407	0.006	0.0382963	NA	NA	NA	NA	NA	NA	0.020963	0.231259	NA	NA	NA	NA	1154468	373723	73055	447372	109934
chr11	12695969	12709469	ENST00000361905	+	ENSG00000187079	TEAD1	protein_coding	1350	0.440889	0.000148148	NA	0.00155556	0.00533333	0.0261481	0.00577778	0.0111111	0.00162963	0.0374074	0.0176296	0.0201481	NA	NA	NA	NA	NA	NA	NA	0.00518519	0.0311111	NA	NA	NA	NA	563355	139066	673586	665052	270329
chr11	129859230	129872730	ENST00000358825	-	ENSG00000170325	PRDM10	protein_coding	1350	0.442667	7.40741e-05	0.00185185	0.0037037	0.00392593	0.0306667	0.00666667	0.0125185	0.000740741	0.0508889	0.0484444	0.0097037	NA	NA	NA	NA	NA	NA	NA	NA	0.301185	NA	NA	NA	NA	67240	223843	1149568	66985	103129
chr1	115199543	115213043	ENST00000493549	-	ENSG00000175984	DENND2C	protein_coding	1350	0.402296	0.000148148	0.0017037	NA	0.00311111	0.0434074	0.00311111	0.00777778	0.000740741	0.175037	0.117704	0.00207407	NA	NA	NA	NA	NA	NA	NA	0.00244444	0.251259	NA	NA	NA	NA	48778	34041	648168	971530	44724
chr11	76777979	76791479	ENST00000531028	+	ENSG00000149260	CAPN5	protein_coding	1350	0.513852	0.000222222	0.00340741	0.00466667	0.0195556	0.0346667	0.00896296	0.004	0.000740741	0.00525926	0.283778	NA	0.0334815	NA	NA	NA	NA	NA	NA	0.00896296	0.118148	NA	NA	NA	NA	482700	43129	215080	686099	56983
chr1	182808504	182822004	ENST00000367549	+	ENSG00000135829	DHX9	protein_coding	1350	0.404296	0.00037037	0.00562963	NA	0.00162963	0.017037	0.0042963	0.00807407	0.000740741	0.0371852	0.218519	0.00377778	0.0891852	NA	NA	NA	NA	NA	NA	NA	0.195926	NA	NA	NA	NA	144090	1748525	746827	250110	48382
chr11	88057455	88070955	ENST00000227266	-	ENSG00000109861	CTSC	protein_coding	1350	0.390889	0.00037037	0.00185185	0.002	NA	0.0324444	0.015037	0.00555556	NA	0.00688889	0.00459259	0.00644444	0.0674815	NA	NA	NA	NA	NA	NA	0.00140741	0.129704	NA	NA	NA	NA	122320	1862641	991079	5323860	44177
chr12	109915207	109928707	ENST00000434735	+	ENSG00000151148	UBE3B	protein_coding	1350	0.445111	0.000666667	0.00340741	0.00162963	0.00133333	0.0312593	0.0147407	0.00696296	0.000666667	0.0428889	0.0947407	0.00303704	0.00918519	NA	NA	NA	NA	NA	NA	0.00162963	0.213185	NA	NA	NA	NA	56292	209177	36313	52	59300
chr12	112806396	112819896	ENST00000430131	-	ENSG00000173064	C12orf51	protein_coding	1350	0.448074	7.40741e-05	NA	NA	0.00666667	0.0265185	NA	0.0160741	NA	NA	0.118222	0.00177778	0.0358519	NA	NA	NA	NA	NA	NA	0.000296296	0.437407	NA	NA	NA	NA	233261	23097	188488	36639	221904
chr1	215179118	215192618	ENST00000486921	+	ENSG00000082482	KCNK2	protein_coding	1350	0.347407	7.40741e-05	NA	NA	NA	0.0271852	0.00911111	0.00518519	NA	NA	0.400074	0.00407407	NA	NA	NA	NA	NA	NA	NA	0.0248889	0.0801481	NA	NA	NA	NA	521616	341204	2384715	454094	230466
chr1	2160134	2173634	ENST00000378536	+	ENSG00000157933	SKI	protein_coding	1350	0.596074	0.000148148	0.00355556	0.00140741	0.00637037	0.0302222	NA	0.00451852	0.0042963	NA	0.0225185	0.00703704	NA	NA	NA	NA	NA	NA	NA	0.00644444	0.0734074	NA	NA	NA	NA	123079	594144	52561	20962	81424
chr1	244601936	244615436	ENST00000366535	-	ENSG00000035687	ADSS	protein_coding	1350	0.407111	7.40741e-05	0.00355556	0.00214815	0.00177778	0.0319259	NA	0.00725926	NA	0.0174074	0.127481	0.00651852	NA	NA	0.00940741	NA	NA	NA	NA	0.00355556	0.0856296	NA	NA	NA	NA	568550	398165	354658	200915	43640
chr13	113228981	113242481	ENST00000261965	-	ENSG00000126216	TUBGCP3	protein_coding	1350	0.435333	0.000222222	NA	0.0142222	0.008	0.0259259	0.0154815	0.00348148	0.002	0.0422963	0.321259	0.0156296	0.0582222	NA	NA	NA	NA	NA	NA	NA	0.10763	NA	NA	NA	NA	1635065	589443	1244400	102161	103156
chr13	20532810	20546310	ENST00000456228	+	ENSG00000121741	ZMYM2	protein_coding	1350	0.40363	0.000222222	0.0017037	0.00237037	0.0057037	0.0428889	0.00251852	0.0106667	NA	NA	0.0903704	0.011037	NA	NA	NA	NA	NA	NA	NA	0.0147407	0.226815	NA	NA	NA	NA	568397	285211	404995	95034	133158
chr1	32757687	32771187	ENST00000373548	+	ENSG00000116478	HDAC1	protein_coding	1350	0.475037	0.000222222	NA	0.002	0.00192593	0.0300741	0.00140741	0.011037	NA	0.0225926	0.144889	0.00474074	0.026963	NA	NA	NA	NA	NA	NA	0.00214815	0.496593	NA	NA	NA	NA	30174	43226	1752	50376	41549
chr13	77887679	77901179	ENST00000360084	-	ENSG00000005810	MYCBP2	protein_coding	1350	0.421926	7.40741e-05	0.00533333	0.00355556	NA	0.0300741	0.0132593	0.00644444	0.000814815	0.0377778	0.175037	NA	0.132148	NA	NA	NA	NA	NA	NA	0.0154815	0.131556	NA	NA	NA	NA	259848	1287241	284527	2154079	228976
chr14	103243813	103257313	ENST00000560371	+	ENSG00000131323	TRAF3	protein_coding	1350	0.467704	0.000148148	0.00177778	0.00533333	0.00755556	0.0276296	0.0159259	0.00474074	0.000666667	0.00940741	0.136963	0.0116296	0.0257778	NA	NA	NA	NA	NA	NA	0.0160741	0.290519	0.00762963	NA	NA	NA	308850	46900	114902	267685	134024
chr14	50684776	50698276	ENST00000216373	-	ENSG00000100485	SOS2	protein_coding	1350	0.409333	0.000148148	0.006	NA	NA	0.0488889	NA	0.0112593	NA	0.0607407	0.181333	0.00637037	0.0193333	NA	NA	NA	NA	NA	NA	0.0100741	0.267926	NA	NA	NA	NA	74979	10875	294504	80770	114429
chr14	63996592	64010092	ENST00000337537	-	ENSG00000154001	PPP2R5E	protein_coding	1350	0.422593	0.000148148	NA	0.0042963	0.0116296	0.0259259	0.00785185	0.0148889	0.00140741	0.0197778	0.0798519	0.00733333	NA	NA	NA	NA	NA	NA	NA	0.00207407	0.336815	NA	NA	NA	NA	2522310	53664	1401665	309590	172017
chr15	40226347	40239847	ENST00000559624	+	ENSG00000128829	EIF2AK4	protein_coding	1350	0.40363	0.000296296	0.00348148	NA	NA	0.0408148	0.00281481	0.0077037	0.000666667	0.196444	0.120889	0.0104444	0.0603704	NA	NA	NA	NA	NA	NA	0.00140741	0.108222	NA	NA	NA	NA	65164	336679	61543	13254	41283
chr1	54291033	54304533	ENST00000371429	-	ENSG00000058804	TMEM48	protein_coding	1350	0.423852	0.000444444	0.0037037	0.0017037	0.00118519	0.0313333	NA	0.00955556	0.000888889	0.004	0.0834815	0.00844444	0.0388148	NA	NA	NA	NA	NA	NA	NA	0.309778	NA	NA	NA	NA	64656	12858	584664	107503	73400
chr15	56521983	56535483	ENST00000423270	-	ENSG00000181827	RFX7	protein_coding	1350	0.374889	7.40741e-05	0.00162963	0.00392593	0.0017037	0.0414074	NA	0.00777778	NA	0.0321481	0.0274815	0.00518519	0.163333	NA	NA	NA	NA	NA	NA	0.00525926	0.0811852	NA	NA	NA	NA	209648	185445	847637	675349	152751
chr15	65822756	65836256	ENST00000562901	+	ENSG00000074696	PTPLAD1	protein_coding	1350	0.427926	0.00037037	0.00377778	0.00407407	0.00162963	0.0227407	NA	0.00896296	0.000740741	0.191259	0.215778	NA	0.0685185	NA	NA	NA	NA	NA	NA	0.00348148	0.262889	NA	NA	NA	NA	51513	571715	8339	12721	46255
chr15	69099734	69113234	ENST00000465139	-	ENSG00000140350	ANP32A	protein_coding	1350	0.517333	0.000296296	NA	NA	0.013037	0.0397778	0.0222963	0.0108889	0.00362963	0.0536296	0.0458519	0.0111852	NA	NA	NA	NA	NA	NA	NA	0.00377778	0.144519	NA	NA	NA	NA	348742	1227308	53090	339738	42360
chr1	57031741	57045241	ENST00000371250	-	ENSG00000162407	PPAP2B	protein_coding	1350	0.437852	7.40741e-05	0.00177778	0.00466667	0.00525926	0.0273333	NA	0.00659259	NA	0.0394074	0.0876296	0.00185185	NA	NA	NA	NA	NA	NA	NA	0.00444444	0.241926	NA	NA	NA	NA	1324202	1901149	1322113	2717383	84822
chr16	3415112	3428612	ENST00000575785	+	ENSG00000262621	LA16c-306E5.2	processed_transcript	1350	0.450222	0.000296296	0.00177778	0.00111111	0.00148148	0.0376296	0.0199259	0.00222222	0.000888889	0.0198519	0.0635556	0.0131852	NA	NA	NA	NA	NA	NA	NA	NA	0.196296	NA	NA	0.0153333	NA	38555	46536	30997	59673	121841
chr16	4674826	4688326	ENST00000399577	+	ENSG00000102858	MGRN1	protein_coding	1350	0.515037	0.000222222	NA	0.002	0.00985185	0.0313333	0.00681481	0.00874074	NA	0.0383704	0.148444	0.00755556	NA	NA	NA	NA	NA	NA	NA	0.00474074	0.493111	NA	NA	NA	NA	28867	114478	31684	9899	66149
chr16	47481685	47495185	ENST00000544001	-	ENSG00000129636	ITFG1	protein_coding	1350	0.376148	0.000518519	0.00362963	NA	0.00177778	0.0367407	0.00933333	0.00555556	NA	NA	0.081037	0.00674074	0.0448148	NA	NA	NA	0.00703704	NA	NA	0.00162963	0.0781481	NA	NA	NA	NA	277249	899260	489984	24	305669
chr16	58650290	58663790	ENST00000317147	-	ENSG00000125107	CNOT1	protein_coding	1350	0.455407	0.000296296	0.00333333	NA	0.00340741	0.0411852	NA	0.00977778	NA	0.0231111	0.0211852	0.0017037	0.0552593	NA	NA	NA	NA	NA	NA	NA	0.492667	0.00688889	NA	NA	NA	29955	36507	183742	7922675	109935
chr17	20058651	20072151	ENST00000582063	+	ENSG00000128487	SPECC1	protein_coding	1350	0.424741	0.000222222	0.00385185	0.00214815	0.00540741	0.0287407	0.0148148	0.00162963	NA	0.0308889	0.148519	0.00540741	0.0539259	NA	NA	NA	NA	NA	NA	0.0143704	0.232963	NA	NA	NA	NA	931589	477743	804254	177522	49400
chr17	27717482	27730982	ENST00000583121	+	ENSG00000160551	TAOK1	protein_coding	1350	0.437407	0.000296296	0.0017037	NA	0.00792593	0.036963	0.00955556	0.00762963	NA	0.0106667	NA	0.0122963	0.0294074	NA	NA	NA	NA	NA	NA	0.0162222	0.459259	NA	NA	NA	NA	138256	529410	130206	96316	85239
chr18	32621324	32634824	ENST00000300249	+	ENSG00000166974	MAPRE2	protein_coding	1350	0.397926	7.40741e-05	0.00340741	0.00674074	NA	0.0351111	0.0263704	0.00703704	0.00103704	NA	0.092	NA	0.0257778	NA	NA	NA	NA	NA	NA	0.0294815	0.0631852	NA	NA	NA	NA	159669	2909800	169698	3098233	101054
chr19	5623150	5636650	ENST00000454510	+	ENSG00000160633	SAFB	protein_coding	1350	0.452296	0.000222222	0.00177778	0.00192593	0.00585185	0.019037	0.00962963	0.00637037	0.00148148	0.0271852	0.147852	NA	NA	NA	NA	NA	NA	NA	NA	NA	0.262889	NA	NA	NA	NA	17884	469542	15282	212	45188
chr1	9599541	9613041	ENST00000302692	+	ENSG00000171612	SLC25A33	protein_coding	1350	0.474593	7.40741e-05	NA	0.00348148	0.00866667	0.0217037	0.00155556	0.0125926	0.000666667	0.0412593	0.0260741	NA	0.004	NA	NA	NA	NA	NA	NA	0.0082963	0.411778	NA	NA	NA	NA	9390	169951	149537	387705	43290
chr19	7460098	7473598	ENST00000319670	+	ENSG00000104880	ARHGEF18	protein_coding	1350	0.484593	7.40741e-05	0.00259259	NA	0.00333333	0.0264444	0.00540741	0.011037	NA	0.0154074	0.117111	NA	0.0222963	NA	NA	NA	NA	NA	NA	0.00148148	0.478296	NA	NA	NA	NA	80905	372120	41662	166087	77265
chr20	37590942	37604442	ENST00000373325	+	ENSG00000101452	DHX35	protein_coding	1350	0.417333	0.000222222	0.00177778	0.00362963	0.002	0.0242963	0.0177037	0.0022963	NA	0.0817778	0.100074	NA	0.0225185	NA	NA	NA	NA	NA	NA	0.00303704	0.174	NA	NA	NA	0.00392593	2026519	9239	2176146	526924	77422
chr20	47881463	47894963	ENST00000371754	-	ENSG00000124201	ZNFX1	protein_coding	1350	0.446889	0.00037037	NA	0.00585185	0.0133333	0.030963	0.0136296	0.00525926	NA	0.0211852	0.153481	0.0222963	NA	NA	NA	NA	NA	NA	NA	NA	0.269037	NA	NA	NA	NA	50059	354519	141477	518	40480
chr2	106361354	106374854	ENST00000233154	+	ENSG00000071051	NCK2	protein_coding	1350	0.463111	0.000148148	0.00511111	0.00288889	0.00740741	0.0202963	0.012963	0.00192593	0.002	0.0205926	0.0477778	0.0162222	0.0267407	NA	0.0111111	NA	NA	NA	NA	0.00466667	0.0885185	NA	NA	NA	NA	2664222	399370	308404	306124	149376
chr2	187454792	187468292	ENST00000261023	+	ENSG00000138448	ITGAV	protein_coding	1350	0.392667	0.000222222	0.004	NA	0.004	0.0160741	0.0188148	0.0082963	0.000814815	0.0303704	0.0645185	0.0157778	NA	NA	NA	NA	NA	NA	NA	0.00459259	0.165704	NA	NA	NA	NA	63996	80705	834165	3551563	90836
chr2	30670092	30683592	ENST00000466477	+	ENSG00000172954	LCLAT1	protein_coding	1350	0.402222	0.000148148	NA	0.025037	0.00237037	0.0441481	0.0164444	0.00696296	NA	NA	0.139704	0.0037037	0.0602963	NA	NA	NA	NA	NA	NA	NA	0.122963	NA	NA	NA	NA	746787	187193	1382801	1576917	105323
chr2	86409393	86422893	ENST00000410111	-	ENSG00000132305	IMMT	protein_coding	1350	0.428593	0.000222222	NA	0.00407407	NA	0.0448889	0.00822222	0.00748148	0.00185185	NA	0.156963	0.00451852	0.214519	NA	NA	NA	NA	NA	NA	0.00303704	0.264074	NA	NA	NA	NA	49615	307659	13613	3662	51838
chr2	99953816	99967316	ENST00000289371	+	ENSG00000158417	EIF5B	protein_coding	1350	0.404444	0.000222222	0.00533333	0.00377778	0.00148148	0.0408889	0.0107407	0.00703704	0.00155556	0.0557037	0.154	0.0077037	0.0254815	NA	NA	NA	NA	NA	NA	0.00992593	0.253111	NA	NA	NA	NA	1185601	137796	23121	956	62912
chr3	101218585	101232085	ENST00000314261	-	ENSG00000138468	SENP7	protein_coding	1350	0.403037	0.000222222	0.00585185	0.00637037	0.00414815	0.0304444	0.00540741	0.00896296	NA	0.0057037	0.122963	0.00437037	0.00644444	NA	NA	NA	NA	NA	NA	0.00762963	0.323852	0.00785185	NA	NA	NA	152666	136197	724274	48626	188968
chr3	107927917	107941417	ENST00000264538	-	ENSG00000114446	IFT57	protein_coding	1350	0.359111	0.000296296	0.00192593	0.00622222	0.00207407	0.038963	0.00748148	0.00577778	0.000740741	0.0634074	0.162296	0.0037037	0.0823704	NA	NA	NA	NA	NA	NA	0.00148148	0.0697037	NA	NA	NA	NA	91482	327300	371368	366919	61758
chr3	113465866	113479366	ENST00000273398	+	ENSG00000114573	ATP6V1A	protein_coding	1350	0.357926	0.000222222	0.00185185	0.00185185	0.000592593	0.0304444	0.00518519	0.00755556	NA	NA	0.192148	0.0131852	NA	NA	NA	NA	NA	NA	NA	0.010963	0.154741	NA	NA	NA	NA	51814	459561	177117	746	65037
chr3	129312161	129325661	ENST00000393239	-	ENSG00000004399	PLXND1	protein_coding	1350	0.590889	7.40741e-05	NA	0.00251852	0.00940741	0.0725185	0.0125185	0.00303704	0.00140741	NA	0.0817778	0.0164444	NA	NA	NA	NA	NA	NA	NA	0.0184444	0.126593	NA	NA	NA	NA	126809	40973	46470	1243707	51643
chr3	44803209	44816709	ENST00000326047	+	ENSG00000163808	KIF15	protein_coding	1350	0.434444	0.000148148	NA	0.0017037	NA	0.016963	0.00548148	0.00607407	NA	NA	0.179778	NA	0.409037	NA	NA	NA	NA	NA	NA	NA	0.180741	NA	NA	NA	NA	60170	24634	113543	36	91544
chr3	79055109	79068609	ENST00000436010	-	ENSG00000169855	ROBO1	protein_coding	1350	0.386	7.40741e-05	NA	0.00207407	0.00555556	0.0354815	0.0125926	0.00659259	NA	NA	0.0301481	0.00844444	NA	NA	NA	NA	NA	NA	NA	0.0176296	0.0982222	NA	NA	NA	NA	3194354	2470240	3300155	8207803	422219
chr4	139150003	139163503	ENST00000280612	-	ENSG00000151012	SLC7A11	protein_coding	1350	0.365778	0.000222222	0.00355556	0.0022963	NA	0.0285185	0.0166667	0.00511111	0.000740741	NA	0.078963	0.0103704	NA	NA	NA	NA	NA	NA	NA	0.00451852	0.163185	NA	NA	NA	NA	669874	815367	5010771	773439	78252
chr4	140084872	140098372	ENST00000394235	-	ENSG00000109381	ELF2	protein_coding	1350	0.429556	7.40741e-05	0.00348148	NA	0.00607407	0.0531111	0.024	0.00748148	0.000666667	0.0817037	0.133704	0.0265926	0.274074	NA	NA	NA	NA	NA	NA	0.0107407	0.307407	NA	NA	NA	NA	894869	88944	91277	124303	119501
chr4	140222609	140236109	ENST00000296543	+	ENSG00000164134	NAA15	protein_coding	1350	0.418593	0.000222222	0.00177778	NA	0.00140741	0.0302963	0.00355556	0.00859259	0.00140741	0.0973333	0.0734074	0.00762963	NA	NA	NA	NA	NA	NA	NA	0.00703704	0.332296	NA	NA	NA	NA	112351	255514	164582	21117	89913
chr4	153442672	153456172	ENST00000281708	-	ENSG00000109670	FBXW7	protein_coding	1350	0.370148	7.40741e-05	0.00896296	NA	0.00377778	0.0331111	0.0157037	0.00637037	0.00155556	0.0339259	0.0924444	0.00748148	NA	NA	NA	NA	NA	NA	NA	0.0117778	0.141111	NA	NA	NA	NA	5604	91093	831388	1243	213762
chr4	87928140	87941640	ENST00000307808	+	ENSG00000172493	AFF1	protein_coding	1350	0.39837	7.40741e-05	NA	NA	0.00333333	0.0391111	0.0145185	0.00681481	NA	0.0399259	0.0634074	0.00148148	0.0619259	NA	NA	NA	NA	NA	NA	NA	0.106519	NA	NA	NA	NA	375587	191812	114073	72138	134050
chr4	95373038	95386538	ENST00000437932	+	ENSG00000163110	PDLIM5	protein_coding	1350	0.373852	0.000296296	0.00407407	0.00592593	NA	0.0464444	0.00703704	0.00533333	0.000740741	NA	0.068963	0.00459259	NA	NA	NA	NA	NA	NA	NA	NA	0.0685926	NA	NA	NA	NA	3769488	160595	3978479	5394715	216339
chr5	112312399	112325899	ENST00000515408	+	ENSG00000172795	DCP2	protein_coding	1350	0.391111	0.000222222	0.00185185	0.00355556	0.0017037	0.0212593	0.0105926	0.0077037	NA	0.00696296	0.113037	0.00237037	NA	NA	NA	NA	NA	NA	NA	0.00525926	0.223259	NA	NA	NA	NA	496991	83623	2194127	54368	43421
chr5	122745786	122759286	ENST00000508442	-	ENSG00000168944	CEP120	protein_coding	1350	0.389481	0.000444444	NA	0.00540741	0.00481481	0.033037	NA	0.00407407	NA	0.0323704	0.251926	0.00888889	NA	NA	0.027037	NA	NA	NA	NA	NA	0.143926	NA	NA	NA	NA	346861	3118246	374384	88506	73532
chr5	131630136	131643636	ENST00000200652	+	ENSG00000197208	SLC22A4	protein_coding	1350	0.460667	0.000222222	0.00525926	0.00266667	0.00703704	0.0282222	0.00851852	0.00659259	NA	NA	0.296519	NA	NA	NA	NA	NA	NA	NA	NA	0.00785185	0.155037	NA	NA	NA	NA	35264	20989	147164	66580	49763
chr5	131892616	131906116	ENST00000378823	+	ENSG00000113522	RAD50	protein_coding	1350	0.398074	0.000148148	0.00192593	NA	NA	0.0334074	0.0251852	0.00392593	NA	0.00296296	0.419926	NA	0.117704	NA	NA	NA	NA	NA	NA	0.00192593	0.108222	NA	NA	NA	NA	269702	80880	95706	66151	87697
chr5	14858387	14871887	ENST00000284268	-	ENSG00000154122	ANKH	protein_coding	1350	0.431111	0.000148148	0.002	0.00659259	0.00911111	0.046	0.00874074	0.0107407	NA	NA	0.0683704	0.0142963	NA	NA	NA	NA	NA	NA	NA	0.00866667	0.215185	NA	NA	NA	NA	4070500	1579740	132045	628417	166974
chr5	32431367	32444867	ENST00000265069	-	ENSG00000056097	ZFR	protein_coding	1350	0.404963	0.000148148	0.00340741	NA	0.0062963	0.0497037	0.00488889	0.0103704	NA	0.134222	0.0947407	0.0122222	NA	NA	NA	NA	NA	NA	NA	0.0017037	0.248889	NA	NA	NA	NA	91753	1082419	849702	140737	90411
chr5	68530700	68544200	ENST00000256443	+	ENSG00000134058	CDK7	protein_coding	1350	0.407852	0.000148148	0.00414815	0.00711111	0.00614815	0.037037	0.0145926	0.00674074	NA	NA	0.469111	NA	0.076	NA	NA	NA	NA	NA	NA	0.00333333	0.284074	NA	NA	NA	NA	94423	4715	76852	3512759	42550
chr5	74049696	74063196	ENST00000296805	-	ENSG00000164347	GFM2	protein_coding	1350	0.378444	0.000518519	0.00185185	0.00377778	0.00318519	0.0234815	0.012	0.0062963	NA	0.0917037	0.266815	0.00148148	0.043037	NA	NA	NA	NA	NA	NA	NA	0.105926	NA	NA	NA	NA	85947	260092	6083	569796	46167
chr5	78908243	78921743	ENST00000453514	+	ENSG00000164329	PAPD4	protein_coding	1350	0.36837	0.000592593	0.00177778	0.0017037	NA	0.0379259	0.00977778	0.00925926	NA	NA	0.21437	0.0022963	0.0274074	NA	NA	NA	NA	NA	NA	NA	0.179704	NA	NA	NA	NA	755594	285205	324295	98543	74228
chr6	116691010	116704510	ENST00000537543	+	ENSG00000111817	DSE	protein_coding	1350	0.411185	0.000296296	0.00340741	0.00748148	0.00592593	0.0334815	NA	0.000962963	NA	NA	0.0434074	0.00148148	0.0627407	NA	NA	NA	NA	NA	NA	0.00392593	0.0668148	NA	NA	NA	NA	101797	124157	225770	89730	67974
chr6	4021501	4035001	ENST00000480058	+	ENSG00000112739	PRPF4B	protein_coding	1350	0.396296	0.000222222	0.00562963	0.004	NA	0.0313333	0.019037	0.0105185	0.000740741	0.00555556	0.0898519	0.00851852	NA	NA	NA	NA	NA	NA	NA	0.00577778	0.245704	NA	NA	NA	NA	644891	169950	54425	269255	43715
chr7	107220422	107233922	ENST00000005259	+	ENSG00000075790	BCAP29	protein_coding	1350	0.380519	0.000296296	NA	0.0042963	0.00659259	0.0444444	0.0182222	0.00214815	NA	0.0533333	0.231333	0.00962963	0.021037	NA	NA	NA	NA	NA	NA	0.00414815	0.156444	NA	NA	NA	NA	123856	1454	303823	15463	41893
chr7	16685756	16699256	ENST00000258761	+	ENSG00000136261	BZW2	protein_coding	1350	0.376741	7.40741e-05	0.00703704	0.0022963	0.00414815	0.0299259	0.0140741	0.00740741	NA	0.0240741	0.15437	0.0113333	NA	NA	NA	NA	NA	NA	NA	0.00962963	0.111185	NA	NA	NA	NA	67594	3955198	1104628	314	60392
chr7	73868120	73881620	ENST00000265755	+	ENSG00000006704	GTF2IRD1	protein_coding	1350	0.55963	7.40741e-05	0.0017037	0.00740741	0.0157778	0.0317778	0.0183704	0.0108889	0.000666667	0.0251111	0.0527407	0.0193333	NA	NA	NA	NA	NA	NA	NA	0.00140741	0.329778	NA	NA	NA	NA	163909	47847	548162	199382	148797
chr8	104033291	104046791	ENST00000395862	+	ENSG00000155097	ATP6V1C1	protein_coding	1350	0.40637	0.000148148	0.00340741	0.00177778	0.00451852	0.0479259	0.0126667	0.00585185	0.000814815	0.0191852	0.196444	0.00651852	0.0315556	NA	NA	NA	NA	NA	NA	0.00451852	0.150815	NA	NA	NA	NA	237369	2779159	337574	156894	51988
chr8	18858470	18871970	ENST00000521841	-	ENSG00000156011	PSD3	protein_coding	1350	0.445481	0.000148148	NA	NA	0.00340741	0.0343704	0.0136296	0.00896296	0.00148148	0.0325926	0.0399259	0.0167407	0.0271111	NA	NA	NA	NA	NA	NA	NA	0.195407	NA	NA	NA	NA	889463	1231705	944513	299110	78407
chr8	28230483	28243983	ENST00000344423	-	ENSG00000186918	ZNF395	protein_coding	1350	0.482444	0.000296296	0.0105926	0.0037037	0.0152593	0.0241481	0.0077037	0.00762963	0.000666667	0.018	0.155037	0.0417778	NA	NA	NA	NA	NA	NA	NA	0.00318519	0.178593	NA	NA	NA	NA	508634	381191	155314	315169	40881
chr9	124842385	124855885	ENST00000321582	-	ENSG00000175764	TTLL11	protein_coding	1350	0.44563	7.40741e-05	NA	0.00140741	0.00185185	0.0422222	0.00874074	0.00740741	NA	NA	0.122074	NA	0.0292593	NA	NA	NA	NA	NA	NA	0.0197037	0.262519	NA	NA	NA	NA	683340	50452	268076	170996	271678
chr9	126678931	126692431	ENST00000373618	-	ENSG00000119522	DENND1A	protein_coding	1350	0.432444	7.40741e-05	0.00185185	0.00311111	0.00711111	0.0379259	0.00674074	0.00962963	NA	0.0121481	0.259852	0.013037	NA	NA	NA	NA	NA	NA	NA	0.00592593	0.264222	NA	NA	NA	NA	487549	423312	785284	327453	516881
chr9	131314866	131328366	ENST00000358161	+	ENSG00000197694	SPTAN1	protein_coding	1350	0.451259	0.000148148	0.00177778	NA	0.00733333	0.0202222	0.00237037	0.0102222	NA	NA	0.0316296	0.00325926	NA	NA	NA	NA	NA	NA	NA	0.0062963	0.337556	NA	NA	NA	NA	91067	10286	41073	230169	81072
chrX	20272023	20285523	ENST00000544447	-	ENSG00000177189	RPS6KA3	protein_coding	1350	0.394667	0.000148148	NA	0.00207407	0.00844444	0.0197037	NA	0.00266667	0.000740741	0.0544444	0.10363	0.00474074	NA	NA	NA	NA	NA	NA	NA	0.0127407	0.090963	NA	NA	NA	NA	85557	3436253	865698	1572132	112439
chrX	39943156	39956656	ENST00000397354	-	ENSG00000183337	BCOR	protein_coding	1350	0.550148	7.40741e-05	NA	0.00140741	0.0181481	0.0308148	0.008	0.00703704	0.00237037	NA	NA	0.00814815	NA	NA	NA	NA	NA	NA	NA	0.00185185	NA	NA	NA	NA	NA	1729868	529516	1250873	483559	46157
chrX	53700173	53713673	ENST00000218328	-	ENSG00000086758	HUWE1	protein_coding	1350	0.410148	0.00037037	0.00518519	0.00355556	0.006	0.0143704	0.0164444	0.00474074	NA	0.034	0.184	0.00155556	0.00585185	NA	NA	NA	NA	NA	NA	0.00562963	0.0817037	NA	NA	NA	NA	89438	249439	555945	753179	102502
chrX	73640638	73654138	ENST00000276033	+	ENSG00000147100	SLC16A2	protein_coding	1350	0.483407	7.40741e-05	NA	0.00148148	0.0145926	0.03	0.00777778	0.00740741	0.00133333	NA	0.0884444	0.00718519	NA	NA	NA	NA	NA	NA	NA	0.010963	0.160148	NA	NA	NA	NA	813255	350421	122172	127229	113114
chr10	115920729	115933979	ENST00000369287	-	ENSG00000165813	C10orf118	protein_coding	1325	0.386491	0.000226415	0.00430189	0.00158491	0.00309434	0.0491321	NA	0.008	NA	0.0129057	0.0513962	0.00150943	0.0324528	NA	NA	NA	NA	NA	NA	0.00279245	0.205962	NA	NA	NA	NA	280120	256889	221714	647523	53358
chr10	98592017	98605267	ENST00000540664	+	ENSG00000196233	LCOR	protein_coding	1325	0.433887	0.000226415	NA	NA	0.0121509	0.0344151	0.0188679	0.00784906	0.00166038	0.00588679	0.0836981	0.0188679	NA	NA	NA	NA	NA	NA	NA	0.0074717	0.260226	NA	NA	NA	NA	109023	668500	349912	245208	132171
chr11	101981192	101994442	ENST00000282441	+	ENSG00000137693	YAP1	protein_coding	1325	0.405962	0.000226415	NA	0.00467925	0.00407547	0.0467925	0.00535849	0.00928302	0.000981132	0.0529811	0.053434	0.018717	NA	NA	NA	NA	NA	NA	NA	0.00550943	0.127019	NA	NA	NA	NA	196773	109399	245863	5858109	122962
chr11	119076752	119090002	ENST00000264033	+	ENSG00000110395	CBL	protein_coding	1325	0.444981	7.54717e-05	0.00181132	0.00158491	0.00716981	0.0371321	0.00407547	0.012	NA	0.0809057	NA	0.0190189	0.00332075	NA	NA	NA	NA	NA	NA	0.00581132	0.403019	NA	NA	NA	NA	88484	22027	171902	103967	100899
chr11	34073230	34086480	ENST00000341394	+	ENSG00000135387	CAPRIN1	protein_coding	1325	0.430264	0.000679245	0.00188679	0.00226415	0.00618868	0.0384906	NA	0.00875472	0.000830189	NA	0.0179623	0.0127547	NA	NA	NA	NA	NA	NA	NA	0.00150943	0.244981	NA	NA	NA	NA	13880	377584	59303	277159	49473
chr11	48002113	48015363	ENST00000418331	+	ENSG00000149177	PTPRJ	protein_coding	1325	0.47366	7.54717e-05	0.00211321	NA	0.00581132	0.0286038	0.00898113	0.0144151	0.00128302	0.026717	0.0455849	0.00754717	NA	NA	NA	NA	NA	NA	NA	0.00188679	0.400377	NA	NA	NA	NA	9366557	391367	9024989	132056	187557
chr1	160299940	160313190	ENST00000241704	-	ENSG00000122218	COPA	protein_coding	1325	0.398189	0.000528302	0.00354717	NA	NA	0.0380377	0.0085283	0.0074717	0.000679245	0.025434	0.0924528	0.0111698	NA	NA	NA	NA	NA	NA	NA	0.00150943	0.165962	NA	NA	NA	NA	18249	694231	88028	23670	54127
chr1	180123969	180137219	ENST00000367602	+	ENSG00000116260	QSOX1	protein_coding	1325	0.472	0.000150943	NA	0.00279245	0.0104906	0.0266415	0.00301887	0.0029434	NA	0.00724528	0.0173585	0.00271698	0.266943	NA	NA	NA	NA	NA	NA	0.00286792	0.0571321	NA	NA	NA	NA	3200	39954	74828	277028	49196
chr1	193015987	193029237	ENST00000367452	-	ENSG00000116750	UCHL5	protein_coding	1325	0.391849	0.000528302	NA	NA	NA	0.0531321	0.0124528	0.00769811	NA	0.160226	0.0990943	0.00158491	0.0528302	NA	NA	NA	NA	NA	NA	0.00324528	0.163094	NA	NA	NA	NA	6339678	36357	207830	61850	40220
chr1	203764782	203778032	ENST00000453771	+	ENSG00000058673	ZC3H11A	protein_coding	1325	0.403472	0.000226415	0.0034717	NA	0.00415094	0.0342642	0.0029434	0.0128302	0.000679245	NA	0.0890566	0.00883019	NA	NA	NA	NA	NA	NA	NA	0.0029434	0.216377	NA	NA	NA	NA	25957	51573	295407	828378	52033
chr12	100967461	100980711	ENST00000266754	+	ENSG00000139354	GAS2L3	protein_coding	1325	0.401887	0.000226415	0.00173585	NA	NA	0.0200755	0.00943396	0.00611321	NA	NA	0.157509	0.00173585	0.0813585	NA	NA	NA	NA	NA	NA	0.00483019	0.137811	NA	NA	NA	NA	180912	233547	779441	430819	51207
chr12	104221725	104234975	ENST00000392876	-	ENSG00000111696	NT5DC3	protein_coding	1325	0.434113	7.54717e-05	0.00173585	0.00211321	0.00520755	0.0260377	0.0126792	0.00754717	0.000830189	0.0498868	0.253208	0.00264151	0.213736	NA	NA	NA	NA	NA	NA	0.0143396	0.121736	NA	NA	NA	NA	1682614	109005	1603677	89213	68887
chr12	112533576	112546826	ENST00000261745	-	ENSG00000111300	NAA25	protein_coding	1325	0.454113	0.000150943	NA	NA	0.00603774	0.0342642	0.00626415	0.0103396	0.00090566	0.0808302	0.0698113	0.00686792	0.00913208	NA	NA	NA	NA	NA	NA	NA	0.365887	NA	NA	NA	NA	226120	51165	45802	16522	82326
chr12	19592608	19605858	ENST00000398864	+	ENSG00000139154	AEBP2	protein_coding	1325	0.414189	0.000226415	0.00196226	0.00460377	0.00226415	0.0431698	0.0167547	0.00777358	NA	NA	0.0209057	0.00641509	0.0383396	NA	NA	NA	NA	NA	NA	0.0196981	0.296453	0.00792453	NA	NA	NA	1957929	63275	1989235	3650098	79701
chr12	2162464	2175714	ENST00000335762	+	ENSG00000151067	CACNA1C	protein_coding	1325	0.490113	7.54717e-05	0.00173585	0.00203774	0.0123774	0.0449057	NA	0.00649057	NA	NA	0.103472	0.0203774	NA	NA	NA	NA	NA	NA	NA	0.0050566	0.0540377	NA	NA	NA	0.0153208	701643	264619	764382	48787	638112
chr1	23797435	23810685	ENST00000478858	-	ENSG00000088280	ASAP3	protein_coding	1325	0.491396	0.000150943	0.00173585	0.00407547	0.00369811	0.0222642	0.00181132	0.013434	NA	0.0163774	0.216302	NA	0.0353962	NA	NA	NA	NA	NA	NA	NA	0.324453	NA	NA	NA	NA	19424	22234	72355	207583	42842
chr12	50088698	50101948	ENST00000550424	-	ENSG00000161791	FMNL3	protein_coding	1325	0.461509	0.000226415	0.00196226	NA	0.00611321	0.0468679	0.024	0.008	NA	0.0714717	0.104226	NA	0.00392453	NA	NA	NA	NA	NA	NA	0.00950943	0.195019	NA	NA	NA	NA	100037	82980	23499	33344	42006
chr1	25757388	25770638	ENST00000399763	+	ENSG00000204178	TMEM57	protein_coding	1325	0.412226	7.54717e-05	0.00362264	NA	0.00218868	0.0486792	0.00867925	0.0132075	NA	0.0309434	0.0453585	0.00928302	NA	NA	NA	NA	NA	NA	NA	0.00543396	0.220981	NA	NA	NA	NA	72687	68536	349056	183403	69312
chr12	72044499	72057749	ENST00000378743	-	ENSG00000133858	ZFC3H1	protein_coding	1325	0.381359	0.000301887	0.0034717	NA	0.00203774	0.0280755	0.0239245	0.00792453	NA	0.013434	0.324453	0.00384906	NA	NA	NA	NA	NA	NA	NA	NA	0.143472	NA	NA	NA	NA	986529	589537	1268976	22128	54497
chr12	76653619	76666869	ENST00000550380	+	ENSG00000257219	RP11-54A9.1	processed_transcript	1325	0.39117	7.54717e-05	0.00354717	0.00173585	NA	0.02	0.0123019	0.00641509	NA	0.0811321	0.143245	0.00943396	0.0689057	NA	NA	NA	NA	NA	NA	0.0136604	0.168604	NA	NA	NA	NA	464234	757903	44646	174881	42974
chr12	81318454	81331704	ENST00000552864	-	ENSG00000111052	LIN7A	protein_coding	1325	0.395019	0.000226415	0.00173585	0.00158491	0.0034717	0.046566	0.00981132	0.0045283	NA	0.0156981	0.199925	0.00732075	NA	NA	NA	NA	NA	NA	NA	0.00588679	0.100604	NA	NA	NA	NA	65296	1414378	1445916	1420571	145405
chr1	31769842	31783092	ENST00000344147	+	ENSG00000121766	ZCCHC17	protein_coding	1325	0.436	0.000150943	0.00528302	0.00550943	NA	0.0404528	NA	0.013434	NA	0.0682264	0.160302	NA	0.0406792	NA	NA	NA	NA	NA	NA	0.00143396	0.332377	NA	NA	NA	NA	72569	570249	28257	198	67941
chr13	25848897	25862147	ENST00000381801	-	ENSG00000139505	MTMR6	protein_coding	1325	0.415623	7.54717e-05	0.00369811	NA	0.00233962	0.0370566	0.00249057	0.00596226	0.00090566	0.0166792	0.0655849	0.00890566	0.030566	NA	NA	NA	NA	NA	NA	0.00996226	0.219547	NA	NA	NA	NA	325062	924757	149443	13518	41808
chr13	48877887	48891137	ENST00000525036	+	ENSG00000139687	RB1	protein_coding	1325	0.391623	0.000226415	0.00181132	0.00475472	0.00128302	0.0208302	NA	0.00769811	0.000981132	0.0190943	0.219547	0.00324528	NA	NA	NA	NA	NA	NA	NA	0.00973585	0.206415	NA	NA	NA	NA	632160	41655	145211	208647	56986
chr13	49822061	49835311	ENST00000251108	+	ENSG00000102543	CDADC1	protein_coding	1325	0.391094	0.000301887	0.00173585	NA	NA	0.0501887	0.00384906	0.00769811	NA	0.0169811	0.046717	NA	0.0937358	NA	NA	NA	NA	NA	NA	0.00679245	0.176755	NA	NA	NA	NA	156367	38146	20724	714745	45557
chr13	80055287	80068537	ENST00000218652	+	ENSG00000102471	NDFIP2	protein_coding	1325	0.379623	0.000150943	0.00173585	0.00777358	0.00150943	0.0344151	NA	0.00324528	NA	0.0693585	0.143849	0.00158491	0.0737358	NA	NA	NA	NA	NA	NA	0.00777358	0.0961509	NA	NA	NA	NA	11904786	2478635	814824	75364	74923
chr13	98795434	98808684	ENST00000376581	+	ENSG00000152767	FARP1	protein_coding	1325	0.441057	7.54717e-05	0.00264151	0.00196226	0.00777358	0.026717	0.028	0.00483019	NA	0.0291321	0.0791698	0.0163774	0.057283	NA	NA	NA	NA	NA	NA	0.0221132	0.256226	NA	NA	NA	NA	25343	118884	267020	2089698	102124
chr14	103058998	103072248	ENST00000262241	+	ENSG00000089902	RCOR1	protein_coding	1325	0.466038	0.000150943	NA	NA	0.00618868	0.0436226	0.00679245	0.0151698	0.0010566	0.0428679	0.00890566	0.0160755	0.0338868	NA	NA	NA	NA	NA	NA	0.00996226	0.481283	NA	NA	NA	NA	144817	90180	299717	82870	137893
chr14	65555855	65569105	ENST00000341653	-	ENSG00000125952	MAX	protein_coding	1325	0.415321	0.000528302	0.00173585	NA	0.00784906	0.0252075	0.0184151	0.00332075	NA	0.0283019	0.0388679	0.00407547	NA	NA	NA	NA	NA	NA	NA	0.00686792	0.045434	NA	NA	NA	NA	90230	308205	1207	308204	96213
chr14	69606593	69619843	ENST00000341516	-	ENSG00000139990	DCAF5	protein_coding	1325	0.426642	0.000301887	0.00166038	NA	0.0129057	0.0451321	0.00830189	0.00543396	NA	0.0335094	0.0146415	0.0278491	NA	NA	NA	NA	NA	NA	0.00732075	0.00445283	0.222943	NA	NA	NA	NA	133760	226996	517105	38350	102245
chr14	90785231	90798481	ENST00000354366	-	ENSG00000119720	C14orf102	protein_coding	1325	0.420226	7.54717e-05	0.00528302	NA	0.00709434	0.0315472	0.00626415	0.0127547	NA	0.00996226	0.245132	0.00339623	0.0286038	NA	NA	NA	NA	NA	NA	0.00422642	0.289208	NA	NA	NA	NA	337392	208450	19515	64845	55901
chr14	99933966	99947216	ENST00000331768	-	ENSG00000183576	SETD3	protein_coding	1325	0.437434	0.000150943	0.00181132	NA	0.00928302	0.0317736	0.0148679	0.00415094	0.000679245	0.00271698	0.0295849	0.00898113	NA	NA	NA	NA	NA	NA	NA	0.00218868	0.132	NA	NA	NA	NA	3077538	30386	2559265	522	83133
chr15	101142739	101155989	ENST00000332783	+	ENSG00000183475	ASB7	protein_coding	1325	0.401509	0.00045283	0.00181132	0.00407547	0.00203774	0.0235472	0.0125283	0.00716981	0.000679245	0.0556981	0.0110189	0.00324528	NA	NA	NA	NA	NA	NA	NA	NA	0.13034	NA	NA	NA	NA	237269	886110	533188	294	49171
chr15	42867857	42881107	ENST00000290607	+	ENSG00000159433	STARD9	protein_coding	1325	0.444302	0.000301887	0.00181132	0.00211321	0.000754717	0.033283	0.0264151	0.0102642	NA	0.0263396	NA	0.00362264	NA	NA	NA	NA	NA	NA	NA	0.00226415	0.179925	NA	NA	NA	NA	517864	5667	107902	26855	145322
chr15	43385061	43398311	ENST00000546274	-	ENSG00000159459	UBR1	protein_coding	1325	0.410642	7.54717e-05	NA	0.00150943	NA	0.0281509	NA	0.0117736	NA	0.190717	0.114566	0.00422642	NA	NA	NA	NA	NA	NA	NA	0.00196226	0.234717	NA	NA	NA	NA	145304	221662	345115	27410	90457
chr15	44580927	44594177	ENST00000559222	+	ENSG00000166734	CASC4	protein_coding	1325	0.429434	0.000301887	NA	0.00724528	NA	0.0356981	0.0136604	0.00958491	NA	0.0153208	0.0967547	0.00996226	0.0741887	NA	NA	NA	NA	NA	NA	0.0100377	0.327472	NA	NA	NA	NA	98651	420310	205775	93498	49152
chr15	52958319	52971569	ENST00000566768	-	ENSG00000047346	FAM214A	protein_coding	1325	0.383925	0.000226415	0.00550943	0.00656604	0.00928302	0.0275472	NA	0.00588679	NA	0.0510943	0.0915472	0.00498113	NA	NA	NA	NA	NA	NA	NA	NA	0.150415	NA	NA	NA	NA	70356	2501942	573107	2639563	67771
[truncated: 1,312 more rows]

## Sheet: CS-B
Chromosome	Start_(elongation_region)	End_(elongation_region)	Ensembl_Transcript_ID	Strand	Ensembl_Gene_ID	Gene_Symbol	Ensembl_Biotype	Elongation_Rate_(bp/min)	GC_Content	Exons	A_Phased_Repeat	Direct_Repeat	empty	G_Quadruplex_Motif	Inverted_Repeat	Mirror_Repeat	Short_Tandem_Repeat	Z_DNA_Motif	DNA	LINE	Low_complexity	LTR	Other	RC	RNA	rRNA	Satellite	scRNA	Simple_repeat	SINE	snRNA	srpRNA	tRNA	Unknown	Dist_to_Downstream_Sense	Dist_to_Upstream_Sense	Dist_to_Downstream_Antisense	Dist_to_Upstream_Antisense	Transcript_Length
[truncated: 1,932 more rows]

[truncated: 3 more sheets: TM, K562, MCF-7]
