# Supplementary material for: Rate of elongation by RNA polymerase II is associated with specific gene features and epigenetic modifications
Source: HighWire-hosted journal article supplement (doi:10.1101/gr.171405.113), 2014-04-08
Supplement: Supplemental_Table4.xlsx [file Supplemental_Table4.xlsx]

## Sheet: Sheet1
Feature_ID	Analysis	Obs_Reg_Coeff.HF1	Median_Perm_Reg_Coeff.HF1	Corr_Reg_Coeff.HF1	FDR_P_val.HF1	Obs_Reg_Coeff.CS-B	Median_Perm_Reg_Coeff.CS-B	Corr_Reg_Coeff.CS-B	FDR_P_val.CS-B	Obs_Reg_Coeff.TM	Median_Perm_Reg_Coeff.TM	Corr_Reg_Coeff.TM	FDR_P_val.TM	Obs_Reg_Coeff.K562	Median_Perm_Reg_Coeff.K562	Corr_Reg_Coeff.K562	FDR_P_val.K562	Obs_Reg_Coeff.mcf7	Median_Perm_Reg_Coeff.mcf7	Corr_Reg_Coeff.mcf7	FDR_P_val.mcf7
Exons	exon_num	-0.000899055	-0.000440176	-0.000458879	0	-0.000808261	-0.000464921	-0.00034334	0	-0.000743069	-0.000269536	-0.000473533	0	-0.000741733	-0.000471669	-0.000270064	0	-0.000628044	-0.00023031	-0.000397735	0
GC Content	gc_content	-0.000114741	-3.61823e-05	-7.85583e-05	0	-4.3315e-05	-4.21569e-05	-1.15816e-06	0.468	-7.06387e-05	-2.27326e-05	-4.79061e-05	0	-7.7317e-05	-4.39319e-05	-3.33851e-05	0	-4.62334e-05	-2.20859e-05	-2.41475e-05	0
Transcript Length	gene_length	0.000165947	-2.4681e-07	0.000166193	0	0.00016347	-1.30038e-06	0.000164771	0	0.000255889	1.86667e-06	0.000254022	0	0.000171565	8.82572e-07	0.000170682	0	0.00015291	-1.71004e-08	0.000152927	0
Dist_to_Downstream_Antisense	neighborhood	0.000330372	-1.11962e-06	0.000331492	0.009	0.000219186	7.75914e-07	0.00021841	0.084	0.000367185	6.52501e-07	0.000366532	0.00457143	0.000446657	3.02145e-06	0.000443635	0	0.000342063	-3.83535e-06	0.000345898	0
Dist_to_Downstream_Sense	neighborhood	0.000470399	-3.24675e-06	0.000473646	0	0.00013792	-3.9956e-06	0.000141915	0.186	0.000526725	3.01764e-06	0.000523707	0	0.000339851	-5.82403e-06	0.000345675	0	0.000315248	-8.18715e-07	0.000316067	0.006
Dist_to_Upstream_Antisense	neighborhood	0.000485707	-2.07297e-06	0.00048778	0.0241154	0.000724471	7.49729e-08	0.000724396	0	0.000870998	-2.94446e-06	0.000873942	0	0.00125417	-5.97845e-06	0.00126015	0	0.000834308	-8.65559e-06	0.000842964	0
Dist_to_Upstream_Sense	neighborhood	0.000547735	9.42261e-07	0.000546792	0	0.000174212	-7.51383e-07	0.000174963	0.130462	0.00026108	-3.33106e-06	0.000264411	0.0533333	0.000426103	3.38282e-06	0.00042272	0	0.000284117	-3.01848e-06	0.000287135	0.0112
A_Phased_Repeat_antisense	nonb	-0.000277709	-0.000453666	0.000175957	0.0033	-0.000437764	-0.000430422	-7.34146e-06	0.468	-0.000330717	-0.000279473	-5.12436e-05	0.29037	-0.000489001	-0.000498207	9.20537e-06	0.4665	-0.000360438	-0.000247492	-0.000112946	0.0566154
A_Phased_Repeat_sense	nonb	-0.000359805	-0.000460867	0.000101062	0.0856429	-0.000465815	-0.000480888	1.50732e-05	0.468	-0.00014492	-0.000267492	0.000122571	0.055	-0.000415503	-0.000492065	7.65622e-05	0.0931579	-0.000146753	-0.000247096	0.000100344	0.0672
Direct_Repeat_antisense	nonb	-0.00055891	-0.000428677	-0.000130232	0.0649688	-0.000495659	-0.00042577	-6.98894e-05	0.238316	-0.000270792	-0.000279573	8.78175e-06	0.4695	-0.000593072	-0.000513533	-7.95388e-05	0.124565	-0.000236745	-0.000268638	3.18928e-05	0.358069
Direct_Repeat_sense	nonb	-0.000623114	-0.000453357	-0.000169756	0.0286	-0.000496452	-0.000442402	-5.40499e-05	0.300364	-0.000340142	-0.00024879	-9.13522e-05	0.174609	-0.000553114	-0.000502344	-5.07695e-05	0.24375	-0.000297225	-0.000245711	-5.15137e-05	0.268667
G_Quadruplex_Motif_antisense	nonb	-0.00080162	-0.000712781	-8.88395e-05	0.142043	-0.000726193	-0.000737698	1.15046e-05	0.468	-0.000697708	-0.000559825	-0.000137883	0.0589474	-0.000802797	-0.000798976	-3.8208e-06	0.4665	-0.00053819	-0.000517406	-2.07837e-05	0.3792
G_Quadruplex_Motif_sense	nonb	-0.000731495	-0.000712827	-1.86676e-05	0.4213	-0.000579352	-0.00073441	0.000155059	0.0388571	-0.00054944	-0.000543461	-5.97897e-06	0.4695	-0.000704881	-0.00081203	0.00010715	0.03625	-0.000344424	-0.000529698	0.000185274	0.00711111
Inverted_Repeat_antisense	nonb	5.47604e-05	3.00175e-05	2.47428e-05	0.289056	-3.10168e-05	3.3743e-05	-6.47599e-05	0.0888889	8.61619e-05	2.3055e-05	6.31069e-05	0.0589474	0.000113356	5.84673e-05	5.48891e-05	0.0871875	3.85718e-05	2.13856e-05	1.71862e-05	0.326769
Inverted_Repeat_sense	nonb	9.50499e-05	3.66853e-05	5.83647e-05	0.084975	4.36325e-05	3.91956e-05	4.43694e-06	0.468	6.44176e-05	1.85945e-05	4.58231e-05	0.127238	8.37535e-05	4.21393e-05	4.16142e-05	0.124565	0.000111381	2.54813e-05	8.58995e-05	0.00457143
Mirror_Repeat_antisense	nonb	-2.18844e-05	-0.000301805	0.000279921	0	-0.000280803	-0.000286745	5.94243e-06	0.468	6.23954e-05	-0.000168957	0.000231352	0.0142222	-0.000207563	-0.000320955	0.000113392	0.0871875	-4.89836e-05	-0.000164471	0.000115487	0.0993684
Mirror_Repeat_sense	nonb	-0.000343826	-0.000345841	2.01546e-06	0.4995	-0.000475382	-0.00035303	-0.000122352	0.130462	-0.000123251	-0.000183517	6.02666e-05	0.29037	-0.000345549	-0.000382295	3.67459e-05	0.334038	-2.27553e-05	-0.000166637	0.000143882	0.048
Short_Tandem_Repeat_antisense	nonb	0.000133378	4.97796e-05	8.35982e-05	0.09	6.99199e-05	4.2421e-05	2.7499e-05	0.379333	0.000135997	2.45093e-05	0.000111488	0.0533333	-8.56203e-06	5.92111e-05	-6.77732e-05	0.0891176	9.47486e-05	2.43114e-05	7.04372e-05	0.0993684
Short_Tandem_Repeat_sense	nonb	9.0976e-06	6.28954e-05	-5.37978e-05	0.184673	4.45616e-05	5.85327e-05	-1.39711e-05	0.468	7.7945e-05	3.89469e-05	3.89981e-05	0.29037	1.13924e-05	6.15569e-05	-5.01644e-05	0.124565	6.24971e-05	1.79676e-05	4.45294e-05	0.173217
Z_DNA_Motif_antisense	nonb	-0.000792358	-0.00070799	-8.43676e-05	0.18216	-0.00081296	-0.000738645	-7.43151e-05	0.238316	-0.000476907	-0.000520896	4.39893e-05	0.328828	NA	NA	NA	NA	-0.00048431	-0.000513957	2.96464e-05	0.358069
Z_DNA_Motif_sense	nonb	-0.000702428	-0.000703999	1.57042e-06	0.4995	-0.000691614	-0.000744872	5.32575e-05	0.301913	-0.000496707	-0.000543722	4.70151e-05	0.324571	NA	NA	NA	NA	-0.000535729	-0.000520553	-1.51762e-05	0.412903
DNA	rep_dna	-0.000135734	-0.000184469	4.87351e-05	0.299357	-0.000211943	-0.000156581	-5.53624e-05	0.300364	-4.57582e-05	-9.41532e-05	4.83951e-05	0.29037	-0.000211998	-0.000217537	5.53922e-06	0.4665	-8.0496e-05	-0.000112953	3.24574e-05	0.341333
LINE	rep_dna	0.000123694	0.000281541	-0.000157847	0.0282857	0.000161594	0.000324479	-0.000162885	0.0388571	0.000121309	0.000265412	-0.000144103	0.0589474	0.000209554	0.000300715	-9.11618e-05	0.0931579	0.000169894	0.000262559	-9.26653e-05	0.0993684
Low_complexity	rep_dna	-0.000152859	-0.000497187	0.000344329	0	-0.000174786	-0.000499294	0.000324508	0	-8.22061e-06	-0.000320196	0.000311976	0.014	-0.00020045	-0.000539702	0.000339252	0	-8.47396e-06	-0.000289664	0.00028119	0
LTR	rep_dna	-0.000672835	-0.000346483	-0.000326353	0.00183333	-0.000279286	-0.000360984	8.16978e-05	0.300364	-0.000645055	-0.000241394	-0.000403661	0	-0.000561079	-0.000391017	-0.000170062	0.0496154	-0.000379035	-0.00023373	-0.000145305	0.069
Simple_repeat	rep_dna	-0.000358351	-0.000391923	3.3572e-05	0.360724	-0.0002656	-0.000384214	0.000118614	0.1056	-0.000274482	-0.000234522	-3.99602e-05	0.3328	-0.000210571	-0.000462973	0.000252402	0	-8.27101e-05	-0.000210113	0.000127403	0.0261818
SINE	rep_dna	5.28448e-06	0.000128339	-0.000123054	0.023375	8.84983e-05	0.000157525	-6.90263e-05	0.161067	-3.764e-05	5.56802e-05	-9.33202e-05	0.0712	-0.000109724	0.000154997	-0.00026472	0	-9.36155e-06	5.02463e-05	-5.96078e-05	0.1192
Methylated CpG Rep1	methylation	NA	NA	NA	NA	NA	NA	NA	NA	NA	NA	NA	NA	-1.02414	-0.830768	-0.193376	0.028	-1.47588	-0.776616	-0.699263	0.0015
Methylated CpG Rep1	methylation	NA	NA	NA	NA	NA	NA	NA	NA	NA	NA	NA	NA	-1.20636	-0.80059	-0.405769	0	-1.22467	-0.724686	-0.49998	0.001
