# Supplementary material for: Rate of elongation by RNA polymerase II is associated with specific gene features and epigenetic modifications
Source: HighWire-hosted journal article supplement (doi:10.1101/gr.171405.113), 2014-04-08
Supplement: Supplemental_Table5.xlsx [file Supplemental_Table5.xlsx]

## Sheet: NF
Gene 1 Chromosome	Gene 1 Start (analysis region)	Gene 1 End (analysis region)	Gene 1 Ensembl Transcript ID	Gene 1 Strand	Gene 1 Ensembl Gene ID	Gene 1 Gene Symbol	Gene 1 Ensembl Biotype	Gene 1 Elongation Rate	Gene 2 Chromosome	Gene 2 Start (analysis region)	Gene 2 End (analysis region)	Gene 2 Ensembl Transcript ID	Gene 2 Strand	Gene 2 Ensembl Gene ID	Gene 2 Gene Symbol	Gene 2 Ensembl Biotype	Gene 2 Elongation Rate
chr1	1782502	1822502	ENST00000378606	-	ENSG00000078369	GNB1	protein_coding	1625	chr1	2160134	2200134	ENST00000378536	+	ENSG00000157933	SKI	protein_coding	1350
chr1	3408012	3448012	ENST00000294599	-	ENSG00000162591	MEGF6	protein_coding	400	chr1	3733763	3773763	ENST00000378230	-	ENSG00000116198	CEP104	protein_coding	550
chr1	4714792	4754792	ENST00000378190	+	ENSG00000196581	AJAP1	protein_coding	825	chr1	3733763	3773763	ENST00000378230	-	ENSG00000116198	CEP104	protein_coding	550
chr1	6721984	6761984	ENST00000377577	-	ENSG00000007923	DNAJC11	protein_coding	1225	chr1	4714792	4754792	ENST00000378190	+	ENSG00000196581	AJAP1	protein_coding	825
chr1	9599541	9639541	ENST00000302692	+	ENSG00000171612	SLC25A33	protein_coding	1350	chr1	9844584	9884584	ENST00000377288	-	ENSG00000171603	CLSTN1	protein_coding	1400
chr1	9844584	9884584	ENST00000377288	-	ENSG00000171603	CLSTN1	protein_coding	1400	chr1	9930394	9970394	ENST00000400904	-	ENSG00000178585	CTNNBIP1	protein_coding	1225
chr1	10092890	10132890	ENST00000253251	+	ENSG00000130939	UBE4B	protein_coding	1025	chr1	9930394	9970394	ENST00000400904	-	ENSG00000178585	CTNNBIP1	protein_coding	1225
chr1	10270863	10310863	ENST00000377093	+	ENSG00000054523	KIF1B	protein_coding	1600	chr1	10092890	10132890	ENST00000253251	+	ENSG00000130939	UBE4B	protein_coding	1025
chr1	11282564	11322564	ENST00000361445	-	ENSG00000198793	MTOR	protein_coding	1100	chr1	11994792	12034792	ENST00000376369	+	ENSG00000083444	PLOD1	protein_coding	650
chr1	11994792	12034792	ENST00000376369	+	ENSG00000083444	PLOD1	protein_coding	650	chr1	12290124	12330124	ENST00000358136	+	ENSG00000048707	VPS13D	protein_coding	1300
chr1	14075930	14115930	ENST00000503842	+	ENSG00000116731	PRDM2	protein_coding	1600	chr1	15853308	15893308	ENST00000375847	+	ENSG00000116138	DNAJC16	protein_coding	875
chr1	15853308	15893308	ENST00000375847	+	ENSG00000116138	DNAJC16	protein_coding	875	chr1	15943995	15983995	ENST00000480945	+	ENSG00000197312	DDI2	protein_coding	1200
chr1	15943995	15983995	ENST00000480945	+	ENSG00000197312	DDI2	protein_coding	1200	chr1	16010827	16050827	ENST00000375799	+	ENSG00000116786	PLEKHM2	protein_coding	1400
chr1	16174359	16214359	ENST00000375759	+	ENSG00000065526	SPEN	protein_coding	1650	chr1	16010827	16050827	ENST00000375799	+	ENSG00000116786	PLEKHM2	protein_coding	1400
chr1	16638949	16678949	ENST00000375592	-	ENSG00000037637	FBXO42	protein_coding	1425	chr1	16174359	16214359	ENST00000375759	+	ENSG00000065526	SPEN	protein_coding	1650
chr1	17222232	17262232	ENST00000466256	+	ENSG00000058453	CROCC	protein_coding	175	chr1	16638949	16678949	ENST00000375592	-	ENSG00000037637	FBXO42	protein_coding	1425
chr1	17866330	17906330	ENST00000361221	+	ENSG00000074964	ARHGEF10L	protein_coding	1125	chr1	17222232	17262232	ENST00000466256	+	ENSG00000058453	CROCC	protein_coding	175
chr1	19243180	19283180	ENST00000455833	-	ENSG00000169991	IFFO2	protein_coding	1625	chr1	19496770	19536770	ENST00000375254	-	ENSG00000127481	UBR4	protein_coding	1475
chr1	19772066	19812066	ENST00000401084	-	ENSG00000077549	CAPZB	protein_coding	1550	chr1	19496770	19536770	ENST00000375254	-	ENSG00000127481	UBR4	protein_coding	1475
chr1	20086438	20126438	ENST00000496528	-	ENSG00000162542	TMCO4	protein_coding	775	chr1	19772066	19812066	ENST00000401084	-	ENSG00000077549	CAPZB	protein_coding	1550
chr1	21463377	21503377	ENST00000438975	-	ENSG00000075151	EIF4G3	protein_coding	750	chr1	21576982	21616982	ENST00000374893	-	ENSG00000117298	ECE1	protein_coding	450
chr1	21576982	21616982	ENST00000374893	-	ENSG00000117298	ECE1	protein_coding	450	chr1	21631997	21671997	ENST00000415912	-	ENSG00000117298	ECE1	protein_coding	875
chr1	22223790	22263790	ENST00000374695	-	ENSG00000142798	HSPG2	protein_coding	1175	chr1	22379120	22419120	ENST00000400259	+	ENSG00000070831	CDC42	protein_coding	1600
chr1	23345941	23385941	ENST00000356634	+	ENSG00000004487	KDM1A	protein_coding	1850	chr1	23770685	23810685	ENST00000478858	-	ENSG00000088280	ASAP3	protein_coding	1325
chr1	24742284	24782284	ENST00000374399	+	ENSG00000001461	NIPAL3	protein_coding	1050	chr1	25071848	25111848	ENST00000374379	+	ENSG00000169504	CLIC4	protein_coding	1775
chr1	25757388	25797388	ENST00000399763	+	ENSG00000204178	TMEM57	protein_coding	1325	chr1	25071848	25111848	ENST00000374379	+	ENSG00000169504	CLIC4	protein_coding	1775
chr1	27776669	27816669	ENST00000430629	-	ENSG00000158195	WASF2	protein_coding	1675	chr1	27890942	27930942	ENST00000480033	-	ENSG00000126705	AHDC1	protein_coding	1200
chr1	28099694	28139694	ENST00000373943	+	ENSG00000117758	STX12	protein_coding	1425	chr1	27890942	27930942	ENST00000480033	-	ENSG00000126705	AHDC1	protein_coding	1200
chr1	28375207	28415207	ENST00000373871	-	ENSG00000158161	EYA3	protein_coding	1425	chr1	28099694	28139694	ENST00000373943	+	ENSG00000117758	STX12	protein_coding	1425
chr1	28696114	28736114	ENST00000373839	+	ENSG00000204138	PHACTR4	protein_coding	950	chr1	28375207	28415207	ENST00000373871	-	ENSG00000158161	EYA3	protein_coding	1425
chr1	31498838	31538838	ENST00000373741	-	ENSG00000134644	PUM1	protein_coding	1600	chr1	31769842	31809842	ENST00000344147	+	ENSG00000121766	ZCCHC17	protein_coding	1325
chr1	32129920	32169920	ENST00000373672	-	ENSG00000084636	COL16A1	protein_coding	675	chr1	32479467	32519467	ENST00000484270	+	ENSG00000121774	KHDRBS1	protein_coding	1475
chr1	32479467	32519467	ENST00000484270	+	ENSG00000121774	KHDRBS1	protein_coding	1475	chr1	32573639	32613639	ENST00000373625	+	ENSG00000025800	KPNA6	protein_coding	1550
chr1	32757687	32797687	ENST00000373548	+	ENSG00000116478	HDAC1	protein_coding	1350	chr1	32573639	32613639	ENST00000373625	+	ENSG00000025800	KPNA6	protein_coding	1550
chr1	33076166	33116166	ENST00000341885	-	ENSG00000176261	ZBTB8OS	protein_coding	1125	chr1	33283043	33323043	ENST00000373476	+	ENSG00000116497	S100PBP	protein_coding	275
chr1	33722174	33762174	ENST00000539719	+	ENSG00000160094	ZNF362	protein_coding	1300	chr1	33856653	33896653	ENST00000484692	-	ENSG00000134686	PHC2	protein_coding	1175
chr1	35457569	35497569	ENST00000357182	-	ENSG00000163867	ZMYM6	protein_coding	950	chr1	35734568	35774568	ENST00000373297	+	ENSG00000146463	ZMYM4	protein_coding	1300
chr1	35734568	35774568	ENST00000373297	+	ENSG00000146463	ZMYM4	protein_coding	1300	chr1	35983551	36023551	ENST00000482929	-	ENSG00000142687	KIAA0319L	protein_coding	975
chr1	35983551	36023551	ENST00000482929	-	ENSG00000142687	KIAA0319L	protein_coding	975	chr1	36067445	36107445	ENST00000373237	-	ENSG00000126067	PSMB2	protein_coding	1575
chr1	36273773	36313773	ENST00000373210	+	ENSG00000134698	EIF2C4	protein_coding	1375	chr1	36396319	36436319	ENST00000324350	+	ENSG00000126070	EIF2C3	protein_coding	1700
chr1	36690017	36730017	ENST00000354618	+	ENSG00000054118	THRAP3	protein_coding	1300	chr1	36396319	36436319	ENST00000324350	+	ENSG00000126070	EIF2C3	protein_coding	1700
chr1	38372729	38412729	ENST00000373023	-	ENSG00000204084	INPP5B	protein_coding	650	chr1	39571083	39611083	ENST00000524432	+	ENSG00000127603	MACF1	protein_coding	1450
chr1	39571083	39611083	ENST00000524432	+	ENSG00000127603	MACF1	protein_coding	1450	chr1	40309183	40349183	ENST00000495175	-	ENSG00000043514	TRIT1	protein_coding	1375
chr1	40309183	40349183	ENST00000495175	-	ENSG00000043514	TRIT1	protein_coding	1375	chr1	40839369	40879369	ENST00000372718	+	ENSG00000084070	SMAP2	protein_coding	1300
chr1	40839369	40879369	ENST00000372718	+	ENSG00000084070	SMAP2	protein_coding	1300	chr1	41157320	41197320	ENST00000467203	+	ENSG00000066136	NFYC	protein_coding	2200
chr1	41667826	41707826	ENST00000488592	-	ENSG00000010803	SCMH1	protein_coding	1200	chr1	41157320	41197320	ENST00000467203	+	ENSG00000066136	NFYC	protein_coding	2200
chr1	43855640	43895640	ENST00000562955	+	ENSG00000198198	SZT2	protein_coding	1400	chr1	43996547	44036547	ENST00000359947	+	ENSG00000142949	PTPRF	protein_coding	1150
chr1	43996547	44036547	ENST00000359947	+	ENSG00000142949	PTPRF	protein_coding	1150	chr1	44115829	44155829	ENST00000372396	+	ENSG00000066135	KDM4A	protein_coding	1075
chr1	44780932	44820932	ENST00000452396	-	ENSG00000117419	ERI3	protein_coding	1250	chr1	44115829	44155829	ENST00000372396	+	ENSG00000066135	KDM4A	protein_coding	1075
chr1	46112302	46152302	ENST00000355105	-	ENSG00000159592	GPBP1L1	protein_coding	1425	chr1	46269285	46309285	ENST00000361297	+	ENSG00000086015	MAST2	protein_coding	1400
chr1	47144824	47184824	ENST00000544071	-	ENSG00000159658	KIAA0494	protein_coding	1300	chr1	47739819	47779819	ENST00000360380	-	ENSG00000123473	STIL	protein_coding	1450
chr1	47739819	47779819	ENST00000360380	-	ENSG00000123473	STIL	protein_coding	1450	chr1	47799469	47839469	ENST00000371873	+	ENSG00000162368	CMPK1	protein_coding	1600
chr1	51945000	51985000	ENST00000371733	-	ENSG00000085832	EPS15	protein_coding	1425	chr1	52082547	52122547	ENST00000337809	+	ENSG00000117859	OSBPL9	protein_coding	1375
chr1	52304477	52344477	ENST00000354831	-	ENSG00000078618	NRD1	protein_coding	1100	chr1	52416436	52456436	ENST00000371655	-	ENSG00000169213	RAB3B	protein_coding	1400
chr1	52608046	52648046	ENST00000287727	+	ENSG00000157077	ZFYVE9	protein_coding	1275	chr1	52416436	52456436	ENST00000371655	-	ENSG00000169213	RAB3B	protein_coding	1400
chr1	52979130	53019130	ENST00000484723	-	ENSG00000134744	ZCCHC11	protein_coding	1475	chr1	53192126	53232126	ENST00000443756	+	ENSG00000162378	ZYG11B	protein_coding	1225
chr1	53753742	53793742	ENST00000480045	-	ENSG00000157193	LRP8	protein_coding	775	chr1	54264533	54304533	ENST00000371429	-	ENSG00000058804	TMEM48	protein_coding	1350
chr1	55641039	55681039	ENST00000294383	-	ENSG00000162402	USP24	protein_coding	1375	chr1	57005241	57045241	ENST00000371250	-	ENSG00000162407	PPAP2B	protein_coding	1350
chr1	59125764	59165764	ENST00000472487	-	ENSG00000162601	MYSM1	protein_coding	1175	chr1	57005241	57045241	ENST00000371250	-	ENSG00000162407	PPAP2B	protein_coding	1350
chr1	63113969	63153969	ENST00000251157	-	ENSG00000116641	DOCK7	protein_coding	1675	chr1	65392187	65432187	ENST00000342505	-	ENSG00000162434	JAK1	protein_coding	1425
chr1	65392187	65432187	ENST00000342505	-	ENSG00000162434	JAK1	protein_coding	1425	chr1	65713902	65753902	ENST00000463018	+	ENSG00000116675	DNAJC6	protein_coding	1750
chr1	66797687	66837687	ENST00000371045	+	ENSG00000184588	PDE4B	protein_coding	1675	chr1	66999066	67039066	ENST00000237247	+	ENSG00000118473	SGIP1	protein_coding	1625
chr1	67390578	67430578	ENST00000355977	+	ENSG00000198160	MIER1	protein_coding	1850	chr1	66999066	67039066	ENST00000237247	+	ENSG00000118473	SGIP1	protein_coding	1625
chr1	68259150	68299150	ENST00000370982	-	ENSG00000172380	GNG12	protein_coding	1600	chr1	68658803	68698803	ENST00000471243	-	ENSG00000116729	WLS	protein_coding	1000
chr1	70631303	70671303	ENST00000370952	-	ENSG00000066557	LRRC40	protein_coding	1675	chr1	70671365	70711365	ENST00000370951	+	ENSG00000116754	SRSF11	protein_coding	2625
chr1	70780417	70820417	ENST00000262346	-	ENSG00000118454	ANKRD13C	protein_coding	1475	chr1	70671365	70711365	ENST00000370951	+	ENSG00000116754	SRSF11	protein_coding	2625
chr1	78354198	78394198	ENST00000401035	+	ENSG00000162614	NEXN	protein_coding	825	chr1	78956757	78996757	ENST00000370756	+	ENSG00000122420	PTGFR	protein_coding	1225
chr1	84543745	84583745	ENST00000370689	+	ENSG00000142875	PRKACB	protein_coding	1150	chr1	85116440	85156440	ENST00000476905	-	ENSG00000117155	SSX2IP	protein_coding	1425
chr1	86004046	86044046	ENST00000535924	-	ENSG00000153904	DDAH1	protein_coding	1175	chr1	86134116	86174116	ENST00000431532	-	ENSG00000117174	ZNHIT6	protein_coding	1125
chr1	86822025	86862025	ENST00000370566	-	ENSG00000122417	ODF2L	protein_coding	1650	chr1	87380331	87420331	ENST00000370551	+	ENSG00000153936	HS2ST1	protein_coding	1300
chr1	89149905	89189905	ENST00000316005	+	ENSG00000065243	PKN2	protein_coding	1500	chr1	89418604	89458604	ENST00000260508	-	ENSG00000137944	CCBL2	protein_coding	950
chr1	91447829	91487829	ENST00000361321	-	ENSG00000122482	ZNF644	protein_coding	1575	chr1	92311787	92351787	ENST00000212355	-	ENSG00000069702	TGFBR3	protein_coding	1525
chr1	92311787	92351787	ENST00000212355	-	ENSG00000069702	TGFBR3	protein_coding	1525	chr1	92764522	92804522	ENST00000370343	+	ENSG00000122484	RPAP2	protein_coding	1225
chr1	93387057	93427057	ENST00000370310	-	ENSG00000154511	FAM69A	protein_coding	1425	chr1	93645476	93685476	ENST00000343253	+	ENSG00000122483	CCDC18	protein_coding	975
chr1	94107385	94147385	ENST00000260502	-	ENSG00000137936	BCAR3	protein_coding	1650	chr1	93645476	93685476	ENST00000343253	+	ENSG00000122483	CCDC18	protein_coding	975
chr1	94883933	94923933	ENST00000394233	+	ENSG00000117528	ABCD3	protein_coding	1400	chr1	94107385	94147385	ENST00000260502	-	ENSG00000137936	BCAR3	protein_coding	1650
chr1	97187221	97227221	ENST00000482253	+	ENSG00000117569	PTBP2	protein_coding	1500	chr1	98346605	98386605	ENST00000306031	-	ENSG00000188641	DPYD	protein_coding	1400
chr1	98346605	98386605	ENST00000306031	-	ENSG00000188641	DPYD	protein_coding	1400	chr1	99127236	99167236	ENST00000370189	+	ENSG00000162627	SNX7	protein_coding	1475
chr1	100503653	100543653	ENST00000370152	+	ENSG00000156875	HIAT1	protein_coding	1300	chr1	100558511	100598511	ENST00000462159	-	ENSG00000156876	SASS6	protein_coding	1400
chr1	100675390	100715390	ENST00000370132	-	ENSG00000137992	DBT	protein_coding	1475	chr1	100558511	100598511	ENST00000462159	-	ENSG00000156876	SASS6	protein_coding	1400
chr1	101361632	101401632	ENST00000370112	+	ENSG00000162695	SLC30A7	protein_coding	1100	chr1	100675390	100715390	ENST00000370132	-	ENSG00000137992	DBT	protein_coding	1475
chr1	103534052	103574052	ENST00000353414	-	ENSG00000060718	COL11A1	protein_coding	1300	chr1	101361632	101401632	ENST00000370112	+	ENSG00000162695	SLC30A7	protein_coding	1100
chr1	108702980	108742980	ENST00000565488	-	ENSG00000085491	SLC25A24	protein_coding	1225	chr1	109102711	109142711	ENST00000405454	+	ENSG00000162636	FAM102B	protein_coding	1425
chr1	109102711	109142711	ENST00000405454	+	ENSG00000162636	FAM102B	protein_coding	1425	chr1	109289310	109329310	ENST00000370008	+	ENSG00000116266	STXBP3	protein_coding	1425
chr1	109544850	109584850	ENST00000357672	-	ENSG00000085433	WDR47	protein_coding	1650	chr1	109289310	109329310	ENST00000370008	+	ENSG00000116266	STXBP3	protein_coding	1425
chr1	110091233	110131233	ENST00000369851	+	ENSG00000065135	GNAI3	protein_coding	1625	chr1	109544850	109584850	ENST00000357672	-	ENSG00000085433	WDR47	protein_coding	1650
chr1	111682249	111722249	ENST00000545121	+	ENSG00000134255	CEPT1	protein_coding	1100	chr1	112162399	112202399	ENST00000433097	+	ENSG00000116473	RAP1A	protein_coding	1450
chr1	112162399	112202399	ENST00000433097	+	ENSG00000116473	RAP1A	protein_coding	1450	chr1	112242025	112282025	ENST00000527570	-	ENSG00000197852	FAM212B	protein_coding	1400
chr1	112938803	112978803	ENST00000271277	+	ENSG00000143079	CTTNBP2NL	protein_coding	1525	chr1	113161795	113201795	ENST00000263168	+	ENSG00000116489	CAPZA1	protein_coding	1650
chr1	113458975	113498975	ENST00000369626	-	ENSG00000155380	SLC16A1	protein_coding	1550	chr1	113499051	113539051	ENST00000435800	+	ENSG00000226419	RP11-31F15.1	lincRNA	1075
chr1	113615831	113655831	ENST00000361127	+	ENSG00000198799	LRIG2	protein_coding	1300	chr1	113499051	113539051	ENST00000435800	+	ENSG00000226419	RP11-31F15.1	lincRNA	1075
chr1	113933371	113973371	ENST00000369617	+	ENSG00000081026	MAGI3	protein_coding	1250	chr1	113615831	113655831	ENST00000361127	+	ENSG00000198799	LRIG2	protein_coding	1300
chr1	114315098	114355098	ENST00000261441	-	ENSG00000081019	RSBN1	protein_coding	1675	chr1	113933371	113973371	ENST00000369617	+	ENSG00000081026	MAGI3	protein_coding	1250
chr1	115013781	115053781	ENST00000358465	-	ENSG00000197323	TRIM33	protein_coding	1450	chr1	115173043	115213043	ENST00000493549	-	ENSG00000175984	DENND2C	protein_coding	1350
chr1	115173043	115213043	ENST00000493549	-	ENSG00000175984	DENND2C	protein_coding	1350	chr1	115260648	115300648	ENST00000530886	-	ENSG00000009307	CSDE1	protein_coding	1500
chr1	115840857	115880857	ENST00000369512	-	ENSG00000134259	NGF	protein_coding	975	chr1	115260648	115300648	ENST00000530886	-	ENSG00000009307	CSDE1	protein_coding	1500
chr1	116519119	116559119	ENST00000369503	+	ENSG00000163393	SLC22A15	protein_coding	1525	chr1	117073661	117113661	ENST00000369487	-	ENSG00000116815	CD58	protein_coding	1225
chr1	117073661	117113661	ENST00000369487	-	ENSG00000116815	CD58	protein_coding	1225	chr1	117602925	117642925	ENST00000369466	+	ENSG00000116830	TTF2	protein_coding	750
chr1	117602925	117642925	ENST00000369466	+	ENSG00000116830	TTF2	protein_coding	750	chr1	117910071	117950071	ENST00000356554	+	ENSG00000198162	MAN1A2	protein_coding	1375
chr1	118432253	118472253	ENST00000369443	-	ENSG00000196505	GDAP2	protein_coding	1250	chr1	117910071	117950071	ENST00000356554	+	ENSG00000198162	MAN1A2	protein_coding	1375
chr1	119643294	119683294	ENST00000235521	-	ENSG00000116874	WARS2	protein_coding	1050	chr1	118432253	118472253	ENST00000369443	-	ENSG00000196505	GDAP2	protein_coding	1250
chr1	146714291	146754291	ENST00000431239	+	ENSG00000131778	CHD1L	protein_coding	1550	chr1	149942625	149982625	ENST00000369135	-	ENSG00000163113	OTUD7B	protein_coding	1400
chr1	149942625	149982625	ENST00000369135	-	ENSG00000163113	OTUD7B	protein_coding	1400	chr1	150039369	150079369	ENST00000369130	+	ENSG00000136631	VPS45	protein_coding	1125
chr1	150809244	150849244	ENST00000358595	-	ENSG00000143437	ARNT	protein_coding	1175	chr1	150039369	150079369	ENST00000369130	+	ENSG00000136631	VPS45	protein_coding	1125
chr1	151584541	151624541	ENST00000368841	+	ENSG00000143376	SNX27	protein_coding	1100	chr1	150809244	150849244	ENST00000358595	-	ENSG00000143437	ARNT	protein_coding	1175
chr1	153855451	153895451	ENST00000368655	-	ENSG00000143614	GATAD2B	protein_coding	1425	chr1	154192655	154232655	ENST00000343815	+	ENSG00000143569	UBAP2L	protein_coding	1400
chr1	154560474	154600474	ENST00000292205	-	ENSG00000160710	ADAR	protein_coding	3125	chr1	154192655	154232655	ENST00000343815	+	ENSG00000143569	UBAP2L	protein_coding	1400
chr1	155492598	155532598	ENST00000548830	-	ENSG00000116539	ASH1L	protein_coding	1450	chr1	155590036	155630036	ENST00000500626	-	ENSG00000246203	RP11-29H23.5	pseudogene	2075
chr1	156502396	156542396	ENST00000491900	-	ENSG00000183856	IQGAP3	protein_coding	850	chr1	155590036	155630036	ENST00000500626	-	ENSG00000246203	RP11-29H23.5	pseudogene	2075
chr1	157963063	158003063	ENST00000392272	+	ENSG00000183853	KIRREL	protein_coding	1400	chr1	156502396	156542396	ENST00000491900	-	ENSG00000183856	IQGAP3	protein_coding	850
chr1	160192321	160232321	ENST00000461888	-	ENSG00000132716	DCAF8	protein_coding	1175	chr1	160273190	160313190	ENST00000241704	-	ENSG00000122218	COPA	protein_coding	1325
chr1	161284047	161324047	ENST00000367975	+	ENSG00000143252	SDHC	protein_coding	875	chr1	160273190	160313190	ENST00000241704	-	ENSG00000122218	COPA	protein_coding	1325
chr1	162601163	162641163	ENST00000446985	+	ENSG00000162733	DDR2	protein_coding	1600	chr1	161284047	161324047	ENST00000367975	+	ENSG00000143252	SDHC	protein_coding	875
chr1	164528644	164568644	ENST00000340699	+	ENSG00000185630	PBX1	protein_coding	1100	chr1	165698417	165738417	ENST00000367881	-	ENSG00000143183	TMCO1	protein_coding	1525
chr1	165698417	165738417	ENST00000367881	-	ENSG00000143183	TMCO1	protein_coding	1525	chr1	165796768	165836768	ENST00000367879	+	ENSG00000143179	UCK2	protein_coding	1800
chr1	167190066	167230066	ENST00000367866	+	ENSG00000143190	POU2F1	protein_coding	1525	chr1	167691187	167731187	ENST00000359523	+	ENSG00000197965	MPZL1	protein_coding	1550
chr1	167691187	167731187	ENST00000359523	+	ENSG00000197965	MPZL1	protein_coding	1550	chr1	168066821	168106821	ENST00000367835	-	ENSG00000143147	GPR161	protein_coding	1525
chr1	169823093	169863093	ENST00000367771	-	ENSG00000000457	SCYL3	protein_coding	1075	chr1	170631869	170671869	ENST00000553786	+	ENSG00000116132	PRRX1	protein_coding	1475
chr1	171454651	171494651	ENST00000392078	+	ENSG00000117523	PRRC2C	protein_coding	1525	chr1	171671387	171711387	ENST00000236192	-	ENSG00000117533	VAMP4	protein_coding	1725
chr1	172501489	172541489	ENST00000367723	+	ENSG00000094975	C1orf9	protein_coding	1575	chr1	171671387	171711387	ENST00000236192	-	ENSG00000117533	VAMP4	protein_coding	1725
chr1	173684109	173724109	ENST00000546011	+	ENSG00000076321	KLHL20	protein_coding	1075	chr1	173951435	173991435	ENST00000367696	-	ENSG00000135870	RC3H1	protein_coding	1475
chr1	173951435	173991435	ENST00000367696	-	ENSG00000135870	RC3H1	protein_coding	1475	chr1	174128548	174168548	ENST00000367689	+	ENSG00000152061	RABGAP1L	protein_coding	975
chr1	178694300	178734300	ENST00000495034	+	ENSG00000116191	RALGPS2	protein_coding	1025	chr1	178995031	179035031	ENST00000263733	+	ENSG00000116199	FAM20B	protein_coding	1400
chr1	178995031	179035031	ENST00000263733	+	ENSG00000116199	FAM20B	protein_coding	1400	chr1	179072179	179112179	ENST00000408940	-	ENSG00000143322	ABL2	protein_coding	1400
chr1	179158819	179198819	ENST00000392043	-	ENSG00000143322	ABL2	protein_coding	1375	chr1	179072179	179112179	ENST00000408940	-	ENSG00000143322	ABL2	protein_coding	1400
chr1	179262925	179302925	ENST00000539888	+	ENSG00000057252	SOAT1	protein_coding	1475	chr1	179158819	179198819	ENST00000392043	-	ENSG00000143322	ABL2	protein_coding	1375
chr1	179923873	179963873	ENST00000367607	+	ENSG00000135837	CEP350	protein_coding	1550	chr1	180123969	180163969	ENST00000367602	+	ENSG00000116260	QSOX1	protein_coding	1325
chr1	180432089	180472089	ENST00000367595	-	ENSG00000135847	ACBD6	protein_coding	1175	chr1	180601140	180641140	ENST00000367590	+	ENSG00000143324	XPR1	protein_coding	1550
chr1	180952047	180992047	ENST00000258301	-	ENSG00000135823	STX6	protein_coding	1775	chr1	180601140	180641140	ENST00000367590	+	ENSG00000143324	XPR1	protein_coding	1550
chr1	182808504	182848504	ENST00000367549	+	ENSG00000135829	DHX9	protein_coding	1350	chr1	182992597	183032597	ENST00000258341	+	ENSG00000135862	LAMC1	protein_coding	1275
chr1	184903682	184943682	ENST00000367511	-	ENSG00000135842	FAM129A	protein_coding	1600	chr1	185014496	185054496	ENST00000367510	+	ENSG00000121481	RNF2	protein_coding	1675
chr1	186304457	186344457	ENST00000367478	-	ENSG00000047410	TPR	protein_coding	1375	chr1	185014496	185054496	ENST00000367510	+	ENSG00000121481	RNF2	protein_coding	1675
chr1	192989237	193029237	ENST00000367452	-	ENSG00000116750	UCHL5	protein_coding	1325	chr1	193091147	193131147	ENST00000367435	+	ENSG00000134371	CDC73	protein_coding	1400
chr1	197075824	197115824	ENST00000367409	-	ENSG00000066279	ASPM	protein_coding	1225	chr1	197129672	197169672	ENST00000367405	-	ENSG00000177888	ZBTB41	protein_coding	925
chr1	197704826	197744826	ENST00000477581	-	ENSG00000213047	DENND1B	protein_coding	1500	chr1	198126093	198166093	ENST00000367385	+	ENSG00000151414	NEK7	protein_coding	1600
chr1	198866539	198906539	ENST00000432296	-	ENSG00000229989	RP11-31E23.1	lincRNA	1475	chr1	198126093	198166093	ENST00000367385	+	ENSG00000151414	NEK7	protein_coding	1600
chr1	200549862	200589862	ENST00000367350	-	ENSG00000118193	KIF14	protein_coding	850	chr1	200599035	200639035	ENST00000447706	-	ENSG00000118197	DDX59	protein_coding	900
chr1	200708686	200748686	ENST00000358823	+	ENSG00000118200	CAMSAP2	protein_coding	1100	chr1	200599035	200639035	ENST00000447706	-	ENSG00000118197	DDX59	protein_coding	900
chr1	201875715	201915715	ENST00000367288	-	ENSG00000163431	LMOD1	protein_coding	1275	chr1	200708686	200748686	ENST00000358823	+	ENSG00000118200	CAMSAP2	protein_coding	1100
chr1	203595689	203635689	ENST00000357681	+	ENSG00000058668	ATP2B4	protein_coding	1475	chr1	203764782	203804782	ENST00000453771	+	ENSG00000058673	ZC3H11A	protein_coding	1325
chr1	204042243	204082243	ENST00000367203	+	ENSG00000143842	SOX13	protein_coding	1050	chr1	203764782	203804782	ENST00000453771	+	ENSG00000058673	ZC3H11A	protein_coding	1325
chr1	205140727	205180727	ENST00000367160	-	ENSG00000133059	DSTYK	protein_coding	1500	chr1	204042243	204082243	ENST00000367203	+	ENSG00000143842	SOX13	protein_coding	1050
chr1	206809073	206849073	ENST00000489878	+	ENSG00000143479	DYRK3	protein_coding	1850	chr1	206858289	206898289	ENST00000294981	+	ENSG00000162889	MAPKAPK2	protein_coding	1525
chr1	207925402	207965402	ENST00000358170	+	ENSG00000117335	CD46	protein_coding	1475	chr1	208002495	208042495	ENST00000415882	-	ENSG00000203709	C1orf132	protein_coding	1100
chr1	208377665	208417665	ENST00000367033	-	ENSG00000076356	PLXNA2	protein_coding	650	chr1	208002495	208042495	ENST00000415882	-	ENSG00000203709	C1orf132	protein_coding	1100
chr1	210111538	210151538	ENST00000422431	+	ENSG00000143469	SYT14	protein_coding	1025	chr1	211432621	211472621	ENST00000367006	+	ENSG00000117625	RCOR3	protein_coding	900
chr1	211432621	211472621	ENST00000367006	+	ENSG00000117625	RCOR3	protein_coding	900	chr1	211964114	212004114	ENST00000366997	-	ENSG00000123684	LPGAT1	protein_coding	1250
chr1	211964114	212004114	ENST00000366997	-	ENSG00000123684	LPGAT1	protein_coding	1250	chr1	212168884	212208884	ENST00000366994	-	ENSG00000143493	INTS7	protein_coding	1250
chr1	212168884	212208884	ENST00000366994	-	ENSG00000143493	INTS7	protein_coding	1250	chr1	212208919	212248919	ENST00000366991	+	ENSG00000143476	DTL	protein_coding	1575
chr1	212458782	212498782	ENST00000542178	+	ENSG00000066027	PPP2R5A	protein_coding	1175	chr1	212208919	212248919	ENST00000366991	+	ENSG00000143476	DTL	protein_coding	1575
chr1	213031597	213071597	ENST00000366971	+	ENSG00000162769	FLVCR1	protein_coding	975	chr1	213224589	213264589	ENST00000543470	+	ENSG00000136643	RPS6KC1	protein_coding	1700
chr1	214454445	214494445	ENST00000491455	+	ENSG00000143499	SMYD2	protein_coding	1075	chr1	214776538	214816538	ENST00000366955	+	ENSG00000117724	CENPF	protein_coding	1925
chr1	215179118	215219118	ENST00000486921	+	ENSG00000082482	KCNK2	protein_coding	1350	chr1	214776538	214816538	ENST00000366955	+	ENSG00000117724	CENPF	protein_coding	1925
chr1	218458629	218498629	ENST00000366932	+	ENSG00000067533	RRP15	protein_coding	1425	chr1	220180000	220220000	ENST00000366923	-	ENSG00000136628	EPRS	protein_coding	925
chr1	220180000	220220000	ENST00000366923	-	ENSG00000136628	EPRS	protein_coding	925	chr1	220267444	220307444	ENST00000366922	+	ENSG00000067704	IARS2	protein_coding	1250
chr1	220405796	220445796	ENST00000358951	-	ENSG00000118873	RAB3GAP2	protein_coding	1300	chr1	220267444	220307444	ENST00000366922	+	ENSG00000067704	IARS2	protein_coding	1250
chr1	221875518	221915518	ENST00000366899	-	ENSG00000143507	DUSP10	protein_coding	1475	chr1	222846526	222886526	ENST00000541237	-	ENSG00000186063	AIDA	protein_coding	1250
chr1	222846526	222886526	ENST00000541237	-	ENSG00000186063	AIDA	protein_coding	1250	chr1	222988406	223028406	ENST00000495684	+	ENSG00000154309	DISP1	protein_coding	1425
chr1	224301789	224341789	ENST00000366862	+	ENSG00000143756	FBXO28	protein_coding	1500	chr1	224478089	224518089	ENST00000281701	-	ENSG00000143748	NVL	protein_coding	1300
chr1	224478089	224518089	ENST00000281701	-	ENSG00000143748	NVL	protein_coding	1300	chr1	224582001	224622001	ENST00000414423	-	ENSG00000162923	WDR26	protein_coding	1275
chr1	225800844	225840844	ENST00000366844	-	ENSG00000154380	ENAH	protein_coding	1725	chr1	226334431	226374431	ENST00000366812	-	ENSG00000182827	ACBD3	protein_coding	1150
chr1	226334431	226374431	ENST00000366812	-	ENSG00000182827	ACBD3	protein_coding	1150	chr1	226457570	226497570	ENST00000366808	-	ENSG00000183814	LIN9	protein_coding	1450
chr1	226457570	226497570	ENST00000366808	-	ENSG00000183814	LIN9	protein_coding	1450	chr1	226555774	226595774	ENST00000366794	-	ENSG00000143799	PARP1	protein_coding	1175
chr1	227466175	227506175	ENST00000366769	-	ENSG00000143776	CDC42BPA	protein_coding	1675	chr1	226555774	226595774	ENST00000366794	-	ENSG00000143799	PARP1	protein_coding	1175
chr1	229604103	229644103	ENST00000537506	-	ENSG00000069248	NUP133	protein_coding	1425	chr1	229654442	229694442	ENST00000344517	-	ENSG00000135776	ABCB10	protein_coding	1375
chr1	230778235	230818235	ENST00000494371	+	ENSG00000135775	COG2	protein_coding	1100	chr1	229654442	229694442	ENST00000344517	-	ENSG00000135776	ABCB10	protein_coding	1375
chr1	233391459	233431459	ENST00000430153	-	ENSG00000135749	PCNXL2	protein_coding	1225	chr1	235451534	235491534	ENST00000349213	-	ENSG00000054267	ARID4B	protein_coding	1525
chr1	235451534	235491534	ENST00000349213	-	ENSG00000054267	ARID4B	protein_coding	1525	chr1	235530675	235570675	ENST00000366601	+	ENSG00000116957	TBCE	protein_coding	1100
chr1	235627781	235667781	ENST00000366600	-	ENSG00000162885	B3GALNT2	protein_coding	1550	chr1	235530675	235570675	ENST00000366601	+	ENSG00000116957	TBCE	protein_coding	1100
chr1	236188462	236228462	ENST00000264187	-	ENSG00000116962	NID1	protein_coding	925	chr1	236305832	236345832	ENST00000366592	+	ENSG00000077585	GPR137B	protein_coding	975
chr1	236727804	236767804	ENST00000366581	-	ENSG00000119285	HEATR1	protein_coding	1075	chr1	236958610	236998610	ENST00000366577	+	ENSG00000116984	MTR	protein_coding	1550
chr1	240255180	240295180	ENST00000319653	+	ENSG00000155816	FMN2	protein_coding	1750	chr1	240735449	240775449	ENST00000318160	-	ENSG00000180875	GREM2	protein_coding	1275
chr1	241763701	241803701	ENST00000331838	-	ENSG00000054277	OPN3	protein_coding	1225	chr1	242011482	242051482	ENST00000366548	+	ENSG00000174371	EXO1	protein_coding	1175
chr1	243378650	243418650	ENST00000522995	-	ENSG00000143702	CEP170	protein_coding	1700	chr1	243974381	244014381	ENST00000552631	-	ENSG00000117020	AKT3	protein_coding	1000
chr1	244575436	244615436	ENST00000366535	-	ENSG00000035687	ADSS	protein_coding	1350	chr1	244816237	244856237	ENST00000302550	+	ENSG00000121644	DESI2	protein_coding	1300
chr1	245318287	245358287	ENST00000407071	+	ENSG00000162849	KIF26B	protein_coding	1575	chr1	244816237	244856237	ENST00000302550	+	ENSG00000121644	DESI2	protein_coding	1300
chr1	246729746	246769746	ENST00000483271	+	ENSG00000162852	CNST	protein_coding	1825	chr1	246887349	246927349	ENST00000366510	+	ENSG00000143653	SCCPDH	protein_coding	825
chr1	247054726	247094726	ENST00000326225	-	ENSG00000153207	AHCTF1	protein_coding	1475	chr1	247202113	247242113	ENST00000474541	-	ENSG00000135747	ZNF670	protein_coding	1725
chr1	247202113	247242113	ENST00000474541	-	ENSG00000135747	ZNF670	protein_coding	1725	chr1	247295307	247335307	ENST00000472531	-	ENSG00000196418	ZNF124	protein_coding	1625
chr10	180405	220405	ENST00000439456	+	ENSG00000015171	ZMYND11	protein_coding	1500	chr10	695683	735683	ENST00000423550	-	ENSG00000151240	DIP2C	protein_coding	1425
chr10	695683	735683	ENST00000423550	-	ENSG00000151240	DIP2C	protein_coding	1425	chr10	937564	977564	ENST00000406525	-	ENSG00000107929	LARP4B	protein_coding	1475
chr10	937564	977564	ENST00000406525	-	ENSG00000107929	LARP4B	protein_coding	1475	chr10	1095478	1135478	ENST00000358220	+	ENSG00000047056	WDR37	protein_coding	1825
chr10	5726801	5766801	ENST00000328090	+	ENSG00000108021	FAM208B	protein_coding	1450	chr10	5815512	5855512	ENST00000380191	-	ENSG00000057608	GDI2	protein_coding	1350
chr10	5931535	5971535	ENST00000397269	+	ENSG00000134452	FBXO18	protein_coding	1025	chr10	5815512	5855512	ENST00000380191	-	ENSG00000057608	GDI2	protein_coding	1350
chr10	7860467	7900467	ENST00000344293	+	ENSG00000165632	TAF3	protein_coding	900	chr10	5931535	5971535	ENST00000397269	+	ENSG00000134452	FBXO18	protein_coding	1025
chr10	11613753	11653753	ENST00000379237	-	ENSG00000148429	USP6NL	protein_coding	1475	chr10	12045023	12085023	ENST00000397053	-	ENSG00000151461	UPF2	protein_coding	1550
chr10	12045023	12085023	ENST00000397053	-	ENSG00000151461	UPF2	protein_coding	1550	chr10	12110971	12150971	ENST00000263035	+	ENSG00000181192	DHTKD1	protein_coding	1100
chr10	14956431	14996431	ENST00000378289	-	ENSG00000152457	DCLRE1C	protein_coding	1075	chr10	15139236	15179236	ENST00000451677	+	ENSG00000241107	RP11-455B2.7	processed_transcript	1025
chr10	15170692	15210692	ENST00000378165	-	ENSG00000152465	NMT2	protein_coding	1425	chr10	15373061	15413061	ENST00000455654	-	ENSG00000148468	FAM171A1	protein_coding	1375
chr10	15862519	15902519	ENST00000277632	-	ENSG00000148481	FAM188A	protein_coding	1300	chr10	15373061	15413061	ENST00000455654	-	ENSG00000148468	FAM171A1	protein_coding	1375
chr10	16478964	16518964	ENST00000343656	+	ENSG00000165983	PTER	protein_coding	700	chr10	16819527	16859527	ENST00000345264	-	ENSG00000148484	RSU1	protein_coding	925
chr10	17686124	17726124	ENST00000377524	+	ENSG00000136738	STAM	protein_coding	1375	chr10	16819527	16859527	ENST00000345264	-	ENSG00000148484	RSU1	protein_coding	925
chr10	22252698	22292698	ENST00000376946	-	ENSG00000136770	DNAJC1	protein_coding	1600	chr10	22963484	23003484	ENST00000376573	-	ENSG00000150867	PIP4K2A	protein_coding	1575
chr10	24755460	24795460	ENST00000376451	+	ENSG00000120549	KIAA1217	protein_coding	225	chr10	22963484	23003484	ENST00000376573	-	ENSG00000150867	PIP4K2A	protein_coding	1575
chr10	26727132	26767132	ENST00000376236	+	ENSG00000077420	APBB1IP	protein_coding	1525	chr10	27110016	27150016	ENST00000376134	-	ENSG00000136754	ABI1	protein_coding	1450
chr10	27110016	27150016	ENST00000376134	-	ENSG00000136754	ABI1	protein_coding	1450	chr10	27491059	27531059	ENST00000375905	-	ENSG00000107897	ACBD5	protein_coding	1225
chr10	27994989	28034989	ENST00000375790	-	ENSG00000150051	MKX	protein_coding	1375	chr10	27491059	27531059	ENST00000375905	-	ENSG00000107897	ACBD5	protein_coding	1225
chr10	28821422	28861422	ENST00000375664	+	ENSG00000095787	WAC	protein_coding	1350	chr10	27994989	28034989	ENST00000375790	-	ENSG00000150051	MKX	protein_coding	1375
chr10	29985710	30025710	ENST00000465422	-	ENSG00000197321	SVIL	protein_coding	1100	chr10	30308453	30348453	ENST00000375377	-	ENSG00000165757	KIAA1462	protein_coding	1075
chr10	31607424	31647424	ENST00000488625	+	ENSG00000148516	ZEB1	protein_coding	1875	chr10	32177742	32217742	ENST00000375250	-	ENSG00000165322	ARHGAP12	protein_coding	1625
chr10	32177742	32217742	ENST00000375250	-	ENSG00000165322	ARHGAP12	protein_coding	1625	chr10	32305359	32345359	ENST00000302418	-	ENSG00000170759	KIF5B	protein_coding	1450
chr10	33207147	33247147	ENST00000374956	-	ENSG00000150093	ITGB1	protein_coding	1225	chr10	32305359	32345359	ENST00000302418	-	ENSG00000170759	KIF5B	protein_coding	1450
chr10	35064253	35104253	ENST00000545260	-	ENSG00000148498	PARD3	protein_coding	1375	chr10	35625455	35665455	ENST00000537547	+	ENSG00000108100	CCNY	protein_coding	1625
chr10	38106479	38146479	ENST00000485560	-	ENSG00000198105	ZNF248	protein_coding	700	chr10	38299578	38339578	ENST00000374618	+	ENSG00000189180	ZNF33A	protein_coding	1175
chr10	43094001	43134001	ENST00000486187	-	ENSG00000196693	ZNF33B	protein_coding	1025	chr10	43278249	43318249	ENST00000374518	+	ENSG00000165733	BMS1	protein_coding	1200
chr10	43633934	43673934	ENST00000374466	+	ENSG00000169826	CSGALNACT2	protein_coding	1800	chr10	43278249	43318249	ENST00000374518	+	ENSG00000165733	BMS1	protein_coding	1200
chr10	44840497	44880497	ENST00000395795	-	ENSG00000107562	CXCL12	protein_coding	1500	chr10	45415137	45455137	ENST00000450287	-	ENSG00000224812	TMEM72-AS1	lincRNA	2075
chr10	46050354	46090354	ENST00000319836	-	ENSG00000165406	2013-03-08	protein_coding	1050	chr10	45415137	45455137	ENST00000450287	-	ENSG00000224812	TMEM72-AS1	lincRNA	2075
chr10	49773138	49813138	ENST00000249601	-	ENSG00000128805	ARHGAP22	protein_coding	925	chr10	49824310	49864310	ENST00000460425	-	ENSG00000128805	ARHGAP22	protein_coding	1125
chr10	50707072	50747072	ENST00000355832	-	ENSG00000225830	ERCC6	protein_coding	1600	chr10	49824310	49864310	ENST00000460425	-	ENSG00000128805	ARHGAP22	protein_coding	1125
chr10	52750945	52790945	ENST00000401604	+	ENSG00000185532	PRKG1	protein_coding	1275	chr10	50707072	50747072	ENST00000355832	-	ENSG00000225830	ERCC6	protein_coding	1600
chr10	59987694	60027694	ENST00000373935	-	ENSG00000151151	IPMK	protein_coding	1475	chr10	60272900	60312900	ENST00000373886	+	ENSG00000122870	BICC1	protein_coding	925
chr10	61626414	61666414	ENST00000263102	-	ENSG00000108091	CCDC6	protein_coding	1275	chr10	62664005	62704005	ENST00000337910	-	ENSG00000072422	RHOBTB1	protein_coding	1025
chr10	62664005	62704005	ENST00000337910	-	ENSG00000072422	RHOBTB1	protein_coding	1025	chr10	63661059	63701059	ENST00000279873	+	ENSG00000150347	ARID5B	protein_coding	1125
chr10	63661059	63701059	ENST00000279873	+	ENSG00000150347	ARID5B	protein_coding	1125	chr10	63808970	63848970	ENST00000309334	+	ENSG00000150347	ARID5B	protein_coding	1250
chr10	63988466	64028466	ENST00000395265	-	ENSG00000182010	RTKN2	protein_coding	1300	chr10	63808970	63848970	ENST00000309334	+	ENSG00000150347	ARID5B	protein_coding	1250
chr10	65185722	65225722	ENST00000399251	-	ENSG00000171988	JMJD1C	protein_coding	1250	chr10	65281123	65321123	ENST00000373758	+	ENSG00000165476	REEP3	protein_coding	1675
chr10	69795105	69835105	ENST00000373700	-	ENSG00000148634	HERC4	protein_coding	1550	chr10	69865912	69905912	ENST00000354393	+	ENSG00000138347	MYPN	protein_coding	1000
chr10	70126946	70166946	ENST00000388768	-	ENSG00000204130	RUFY2	protein_coding	1550	chr10	70320413	70360413	ENST00000373644	+	ENSG00000138336	TET1	protein_coding	1425
chr10	70320413	70360413	ENST00000373644	+	ENSG00000138336	TET1	protein_coding	1425	chr10	70480971	70520971	ENST00000535016	+	ENSG00000060339	CCAR1	protein_coding	875
chr10	70661034	70701034	ENST00000373585	+	ENSG00000107625	DDX50	protein_coding	1350	chr10	70480971	70520971	ENST00000535016	+	ENSG00000060339	CCAR1	protein_coding	875
chr10	70883268	70923268	ENST00000373382	+	ENSG00000122958	VPS26A	protein_coding	1575	chr10	70661034	70701034	ENST00000373585	+	ENSG00000107625	DDX50	protein_coding	1350
chr10	72575726	72615726	ENST00000373202	+	ENSG00000166224	SGPL1	protein_coding	700	chr10	72972327	73012327	ENST00000335350	+	ENSG00000107731	UNC5B	protein_coding	1000
chr10	73724123	73764123	ENST00000373115	+	ENSG00000122863	CHST3	protein_coding	1300	chr10	74345899	74385899	ENST00000398761	-	ENSG00000107745	MICU1	protein_coding	1400
chr10	74345899	74385899	ENST00000398761	-	ENSG00000107745	MICU1	protein_coding	1400	chr10	74451889	74491889	ENST00000373053	+	ENSG00000156026	MCU	protein_coding	1250
chr10	75594343	75634343	ENST00000394762	-	ENSG00000148660	CAMK2G	protein_coding	950	chr10	75757872	75797872	ENST00000372755	+	ENSG00000035403	VCL	protein_coding	1625
chr10	75936444	75976444	ENST00000372734	+	ENSG00000156110	ADK	protein_coding	1550	chr10	75757872	75797872	ENST00000372755	+	ENSG00000035403	VCL	protein_coding	1625
chr10	76871229	76911229	ENST00000372690	+	ENSG00000156671	SAMD8	protein_coding	1675	chr10	75936444	75976444	ENST00000372734	+	ENSG00000156110	ADK	protein_coding	1550
chr10	79358353	79398353	ENST00000286627	-	ENSG00000156113	KCNMA1	protein_coding	1625	chr10	79646378	79686378	ENST00000372388	-	ENSG00000151208	DLG5	protein_coding	1450
chr10	80828792	80868792	ENST00000334512	+	ENSG00000108175	ZMIZ1	protein_coding	1575	chr10	79646378	79686378	ENST00000372388	-	ENSG00000151208	DLG5	protein_coding	1450
chr10	82213922	82253922	ENST00000429989	+	ENSG00000108219	TSPAN14	protein_coding	1575	chr10	80828792	80868792	ENST00000334512	+	ENSG00000108175	ZMIZ1	protein_coding	1575
chr10	86088342	86128342	ENST00000359979	+	ENSG00000107771	FAM190B	protein_coding	1825	chr10	86184695	86224695	ENST00000543283	+	ENSG00000107771	FAM190B	protein_coding	1525
chr10	88241572	88281572	ENST00000342368	-	ENSG00000062650	WAPAL	protein_coding	1450	chr10	88516396	88556396	ENST00000224764	+	ENSG00000107779	BMPR1A	protein_coding	1450
chr10	88814623	88854623	ENST00000277865	-	ENSG00000148672	GLUD1	protein_coding	1275	chr10	88854953	88894953	ENST00000298784	+	ENSG00000122376	FAM35A	protein_coding	1375
chr10	89264632	89304632	ENST00000371994	+	ENSG00000107789	MINPP1	protein_coding	1125	chr10	89419370	89459370	ENST00000361175	+	ENSG00000198682	PAPSS2	protein_coding	1350
chr10	89419370	89459370	ENST00000361175	+	ENSG00000198682	PAPSS2	protein_coding	1350	chr10	89537917	89577917	ENST00000541004	-	ENSG00000138138	ATAD1	protein_coding	1350
chr10	89537917	89577917	ENST00000541004	-	ENSG00000138138	ATAD1	protein_coding	1350	chr10	89622870	89662870	ENST00000371953	+	ENSG00000171862	PTEN	protein_coding	1350
chr10	90639491	90679491	ENST00000371926	+	ENSG00000138134	STAMBPL1	protein_coding	1525	chr10	91461367	91501367	ENST00000394289	+	ENSG00000138182	KIF20B	protein_coding	1750
chr10	92979908	93019908	ENST00000543648	+	ENSG00000180628	PCGF5	protein_coding	875	chr10	93170096	93210096	ENST00000446394	+	ENSG00000165338	HECTD2	protein_coding	1625
chr10	93558069	93598069	ENST00000371627	+	ENSG00000107854	TNKS2	protein_coding	1550	chr10	93683526	93723526	ENST00000265990	+	ENSG00000095564	BTAF1	protein_coding	1550
chr10	94050920	94090920	ENST00000358935	+	ENSG00000198060	2013-03-05	protein_coding	1400	chr10	94293833	94333833	ENST00000265986	-	ENSG00000119912	IDE	protein_coding	1250
chr10	94293833	94333833	ENST00000265986	-	ENSG00000119912	IDE	protein_coding	1250	chr10	94353043	94393043	ENST00000260731	+	ENSG00000138160	KIF11	protein_coding	1750
chr10	95202074	95242074	ENST00000371489	-	ENSG00000138119	MYOF	protein_coding	1150	chr10	94353043	94393043	ENST00000260731	+	ENSG00000138160	KIF11	protein_coding	1750
chr10	96162261	96202261	ENST00000225235	+	ENSG00000108239	TBC1D12	protein_coding	1475	chr10	97010781	97050781	ENST00000329399	-	ENSG00000107438	PDLIM1	protein_coding	1350
chr10	97010781	97050781	ENST00000329399	-	ENSG00000107438	PDLIM1	protein_coding	1350	chr10	97376463	97416463	ENST00000371221	-	ENSG00000059573	ALDH18A1	protein_coding	1200
chr10	97889829	97929829	ENST00000563195	+	ENSG00000177853	ZNF518A	lincRNA	900	chr10	98306809	98346809	ENST00000371142	-	ENSG00000077147	TM9SF3	protein_coding	1200
chr10	98306809	98346809	ENST00000371142	-	ENSG00000077147	TM9SF3	protein_coding	1200	chr10	98592017	98632017	ENST00000540664	+	ENSG00000196233	LCOR	protein_coding	1325
chr10	99218513	99258513	ENST00000370782	-	ENSG00000155229	MMS19	protein_coding	1525	chr10	99258625	99298625	ENST00000370664	+	ENSG00000165886	UBTD1	protein_coding	1575
chr10	99894387	99934387	ENST00000370584	+	ENSG00000166024	R3HCC1L	protein_coding	1350	chr10	99258625	99298625	ENST00000370664	+	ENSG00000165886	UBTD1	protein_coding	1575
chr10	101419263	101459263	ENST00000370489	+	ENSG00000198018	ENTPD7	protein_coding	1450	chr10	101729676	101769676	ENST00000324109	-	ENSG00000107554	DNMBP	protein_coding	1600
chr10	102672720	102712720	ENST00000238961	+	ENSG00000119906	FAM178A	protein_coding	1425	chr10	103113820	103153820	ENST00000370187	+	ENSG00000166167	BTRC	protein_coding	1275
chr10	103113820	103153820	ENST00000370187	+	ENSG00000166167	BTRC	protein_coding	1275	chr10	103415110	103455110	ENST00000457105	-	ENSG00000107829	FBXW4	protein_coding	1075
chr10	103775950	103815950	ENST00000370033	-	ENSG00000120029	C10orf76	protein_coding	1125	chr10	104005289	104045289	ENST00000369983	+	ENSG00000107862	GBF1	protein_coding	1475
chr10	104263744	104303744	ENST00000369902	+	ENSG00000107882	SUFU	protein_coding	1150	chr10	104005289	104045289	ENST00000369983	+	ENSG00000107862	GBF1	protein_coding	1475
chr10	104678071	104718071	ENST00000433628	+	ENSG00000148842	CNNM2	protein_coding	1275	chr10	105070891	105110891	ENST00000369847	-	ENSG00000156374	PCGF6	protein_coding	1250
chr10	105070891	105110891	ENST00000369847	-	ENSG00000156374	PCGF6	protein_coding	1250	chr10	105156405	105196405	ENST00000369797	+	ENSG00000148843	PDCD11	protein_coding	1075
chr10	105575301	105615301	ENST00000369774	-	ENSG00000107957	SH3PXD2A	protein_coding	1000	chr10	105726959	105766959	ENST00000369755	+	ENSG00000065613	SLK	protein_coding	1625
chr10	112679301	112719301	ENST00000265277	+	ENSG00000108061	SHOC2	protein_coding	1500	chr10	114207016	114247016	ENST00000393077	+	ENSG00000151532	VTI1A	protein_coding	1300
chr10	114207016	114247016	ENST00000393077	+	ENSG00000151532	VTI1A	protein_coding	1300	chr10	114710009	114750009	ENST00000543371	+	ENSG00000148737	TCF7L2	protein_coding	1250
chr10	115614420	115654420	ENST00000369301	+	ENSG00000196865	NHLRC2	protein_coding	1500	chr10	115893979	115933979	ENST00000369287	-	ENSG00000165813	C10orf118	protein_coding	1325
chr10	116581503	116621503	ENST00000369248	+	ENSG00000151553	FAM160B1	protein_coding	1500	chr10	115893979	115933979	ENST00000369287	-	ENSG00000165813	C10orf118	protein_coding	1325
chr10	118462085	118502085	ENST00000369209	-	ENSG00000165868	HSPA12A	protein_coding	1425	chr10	118725113	118765113	ENST00000469231	-	ENSG00000187164	KIAA1598	protein_coding	1600
chr10	119094978	119134978	ENST00000334464	-	ENSG00000165650	PDZD8	protein_coding	1550	chr10	118725113	118765113	ENST00000469231	-	ENSG00000187164	KIAA1598	protein_coding	1600
chr10	119766114	119806114	ENST00000355624	-	ENSG00000107560	RAB11FIP2	protein_coding	1075	chr10	119094978	119134978	ENST00000334464	-	ENSG00000165650	PDZD8	protein_coding	1550
chr10	120800396	120840396	ENST00000478852	-	ENSG00000107581	EIF3A	protein_coding	1200	chr10	120967101	121007101	ENST00000392870	+	ENSG00000198873	GRK5	protein_coding	1050
chr10	121652223	121692223	ENST00000369075	+	ENSG00000107651	SEC23IP	protein_coding	1650	chr10	120967101	121007101	ENST00000392870	+	ENSG00000198873	GRK5	protein_coding	1050
chr10	122610695	122650695	ENST00000263461	+	ENSG00000120008	WDR11	protein_coding	1500	chr10	121652223	121692223	ENST00000369075	+	ENSG00000107651	SEC23IP	protein_coding	1650
chr10	123648316	123688316	ENST00000535655	-	ENSG00000107669	ATE1	protein_coding	875	chr10	123872545	123912545	ENST00000493951	+	ENSG00000138162	TACC2	protein_coding	1000
chr10	124221041	124261041	ENST00000368984	+	ENSG00000166033	HTRA1	protein_coding	1000	chr10	123872545	123912545	ENST00000493951	+	ENSG00000138162	TACC2	protein_coding	1000
chr10	125611330	125651330	ENST00000241305	-	ENSG00000121898	CPXM2	protein_coding	1375	chr10	126440296	126480296	ENST00000494792	-	ENSG00000258539	RP11-12J10.3	protein_coding	875
chr10	127408084	127448084	ENST00000419769	+	ENSG00000107938	C10orf137	protein_coding	1250	chr10	128037024	128077024	ENST00000368676	-	ENSG00000148848	ADAM12	protein_coding	1250
chr10	128037024	128077024	ENST00000368676	-	ENSG00000148848	ADAM12	protein_coding	1250	chr10	128593978	128633978	ENST00000280333	+	ENSG00000150760	DOCK1	protein_coding	2200
chr10	131934663	131974663	ENST00000368644	+	ENSG00000108010	GLRX3	protein_coding	1450	chr10	134351324	134391324	ENST00000368594	+	ENSG00000068383	INPP5A	protein_coding	950
chr11	3038843	3078843	ENST00000397111	-	ENSG00000110619	CARS	protein_coding	950	chr11	3147969	3187969	ENST00000534491	-	ENSG00000021762	OSBPL5	protein_coding	1400
chr11	3779022	3819022	ENST00000359171	-	ENSG00000110713	NUP98	protein_coding	1200	chr11	3147969	3187969	ENST00000534491	-	ENSG00000021762	OSBPL5	protein_coding	1400
chr11	8793113	8833113	ENST00000527473	-	ENSG00000166444	ST5	protein_coding	1375	chr11	8852965	8892965	ENST00000533471	-	ENSG00000166444	ST5	protein_coding	1600
chr11	9246937	9286937	ENST00000328194	-	ENSG00000184014	DENND5A	protein_coding	1650	chr11	9406169	9446169	ENST00000379719	+	ENSG00000205339	IPO7	protein_coding	1750
chr11	9406169	9446169	ENST00000379719	+	ENSG00000205339	IPO7	protein_coding	1750	chr11	9482069	9522069	ENST00000396604	+	ENSG00000166478	ZNF143	protein_coding	1450
chr11	9685624	9725624	ENST00000447399	+	ENSG00000133789	SWAP70	protein_coding	1550	chr11	9482069	9522069	ENST00000396604	+	ENSG00000166478	ZNF143	protein_coding	1450
chr11	10675535	10715535	ENST00000547195	-	ENSG00000072952	MRVI1	protein_coding	1275	chr11	9685624	9725624	ENST00000447399	+	ENSG00000133789	SWAP70	protein_coding	1550
chr11	11862970	11902970	ENST00000339865	+	ENSG00000170242	USP47	protein_coding	1525	chr11	11991316	12031316	ENST00000525493	-	ENSG00000050165	DKK3	protein_coding	1250
chr11	12132138	12172138	ENST00000256194	+	ENSG00000133816	MICAL2	protein_coding	1775	chr11	11991316	12031316	ENST00000525493	-	ENSG00000050165	DKK3	protein_coding	1250
chr11	12398732	12438732	ENST00000334956	+	ENSG00000197702	PARVA	protein_coding	1500	chr11	12132138	12172138	ENST00000256194	+	ENSG00000133816	MICAL2	protein_coding	1775
chr11	12695969	12735969	ENST00000361905	+	ENSG00000187079	TEAD1	protein_coding	1350	chr11	12398732	12438732	ENST00000334956	+	ENSG00000197702	PARVA	protein_coding	1500
chr11	13298199	13338199	ENST00000529050	+	ENSG00000133794	ARNTL	protein_coding	1750	chr11	13444844	13484844	ENST00000525108	-	ENSG00000148925	BTBD10	protein_coding	1575
chr11	17189530	17229530	ENST00000540361	-	ENSG00000011405	PIK3C2A	protein_coding	1150	chr11	18303721	18343721	ENST00000396253	-	ENSG00000110756	HPS5	protein_coding	1500
chr11	18303721	18343721	ENST00000396253	-	ENSG00000110756	HPS5	protein_coding	1500	chr11	18570293	18610293	ENST00000543987	-	ENSG00000151116	UEVLD	protein_coding	1075
chr11	19138676	19178676	ENST00000446113	+	ENSG00000177054	ZDHHC13	protein_coding	900	chr11	18570293	18610293	ENST00000543987	-	ENSG00000151116	UEVLD	protein_coding	1075
chr11	19734881	19774881	ENST00000396085	+	ENSG00000166833	NAV2	protein_coding	1375	chr11	19138676	19178676	ENST00000446113	+	ENSG00000177054	ZDHHC13	protein_coding	900
chr11	27454322	27494322	ENST00000389858	-	ENSG00000205213	LGR4	protein_coding	1275	chr11	27683180	27723180	ENST00000584049	-	ENSG00000176697	BDNF	protein_coding	1275
chr11	28089855	28129855	ENST00000263181	-	ENSG00000121621	KIF18A	protein_coding	1525	chr11	27683180	27723180	ENST00000584049	-	ENSG00000176697	BDNF	protein_coding	1275
chr11	28129795	28169795	ENST00000406787	+	ENSG00000169519	METTL15	protein_coding	1275	chr11	27683180	27723180	ENST00000584049	-	ENSG00000176697	BDNF	protein_coding	1275
chr11	31391387	31431387	ENST00000529086	+	ENSG00000170946	DNAJC24	protein_coding	1650	chr11	31491192	31531192	ENST00000533642	-	ENSG00000148950	IMMP1L	protein_coding	975
chr11	32914724	32954724	ENST00000399302	+	ENSG00000060749	QSER1	protein_coding	1625	chr11	33143011	33183011	ENST00000323959	-	ENSG00000176102	CSTF3	protein_coding	1125
chr11	33143011	33183011	ENST00000323959	-	ENSG00000176102	CSTF3	protein_coding	1125	chr11	33278218	33318218	ENST00000525975	+	ENSG00000110422	HIPK3	protein_coding	1500
chr11	34073230	34113230	ENST00000341394	+	ENSG00000135387	CAPRIN1	protein_coding	1325	chr11	34339555	34379555	ENST00000435224	-	ENSG00000166016	ABTB2	protein_coding	775
chr11	34897883	34937883	ENST00000278359	-	ENSG00000149089	APIP	protein_coding	1150	chr11	35160417	35200417	ENST00000263398	+	ENSG00000026508	CD44	protein_coding	1775
chr11	34937376	34977376	ENST00000533550	+	ENSG00000110435	PDHX	protein_coding	1425	chr11	35160417	35200417	ENST00000263398	+	ENSG00000026508	CD44	protein_coding	1775
chr11	35684353	35724353	ENST00000299413	+	ENSG00000166326	TRIM44	protein_coding	1425	chr11	35160417	35200417	ENST00000263398	+	ENSG00000026508	CD44	protein_coding	1775
chr11	36397535	36437535	ENST00000311599	+	ENSG00000135362	PRR5L	protein_coding	950	chr11	35684353	35724353	ENST00000299413	+	ENSG00000166326	TRIM44	protein_coding	1425
chr11	43702230	43742230	ENST00000527433	+	ENSG00000149084	HSD17B12	protein_coding	975	chr11	46299212	46339212	ENST00000529193	+	ENSG00000157613	CREB3L1	protein_coding	1225
chr11	46299212	46339212	ENST00000529193	+	ENSG00000157613	CREB3L1	protein_coding	1225	chr11	46575675	46615675	ENST00000526606	-	ENSG00000110497	AMBRA1	protein_coding	1475
chr11	46575675	46615675	ENST00000526606	-	ENSG00000110497	AMBRA1	protein_coding	1475	chr11	46827843	46867843	ENST00000312055	-	ENSG00000175216	CKAP5	protein_coding	1400
chr11	46827843	46867843	ENST00000312055	-	ENSG00000175216	CKAP5	protein_coding	1400	chr11	46958240	46998240	ENST00000533124	+	ENSG00000149179	C11orf49	protein_coding	1250
chr11	47748853	47788853	ENST00000263773	-	ENSG00000109920	FNBP4	protein_coding	950	chr11	47830019	47870019	ENST00000378460	-	ENSG00000030066	NUP160	protein_coding	900
chr11	48002113	48042113	ENST00000418331	+	ENSG00000149177	PTPRJ	protein_coding	1325	chr11	47830019	47870019	ENST00000378460	-	ENSG00000030066	NUP160	protein_coding	900
chr11	58305693	58345693	ENST00000528489	-	ENSG00000110031	LPXN	protein_coding	1525	chr11	58631688	58671688	ENST00000533636	-	ENSG00000156689	GLYATL2	protein_coding	1375
chr11	61196692	61236692	ENST00000544025	+	ENSG00000256591	RP11-286N22.8	protein_coding	1275	chr11	61583728	61623728	ENST00000257261	+	ENSG00000134824	FADS2	protein_coding	1775
chr11	63399381	63439381	ENST00000538786	-	ENSG00000184743	ATL3	protein_coding	1375	chr11	63448918	63488918	ENST00000341307	+	ENSG00000133318	RTN3	protein_coding	1475
chr11	66886740	66926740	ENST00000398645	+	ENSG00000173120	KDM2A	protein_coding	1825	chr11	67848736	67888736	ENST00000356135	-	ENSG00000110721	CHKA	protein_coding	1150
chr11	67848736	67888736	ENST00000356135	-	ENSG00000110721	CHKA	protein_coding	1150	chr11	67941295	67981295	ENST00000405515	-	ENSG00000110066	SUV420H1	protein_coding	1425
chr11	68228186	68268186	ENST00000393799	+	ENSG00000110075	PPP6R3	protein_coding	1400	chr11	67941295	67981295	ENST00000405515	-	ENSG00000110066	SUV420H1	protein_coding	1425
chr11	70116806	70156806	ENST00000253925	+	ENSG00000131626	PPFIA1	protein_coding	900	chr11	71751733	71791733	ENST00000393695	-	ENSG00000137497	NUMA1	protein_coding	1525
chr11	71751733	71791733	ENST00000393695	-	ENSG00000137497	NUMA1	protein_coding	1525	chr11	72105692	72145692	ENST00000294053	-	ENSG00000162129	CLPB	protein_coding	900
chr11	72813306	72853306	ENST00000409418	-	ENSG00000137478	FCHSD2	protein_coding	1275	chr11	73019334	73059334	ENST00000263674	+	ENSG00000110237	ARHGEF17	protein_coding	1425
chr11	73269234	73309234	ENST00000064778	-	ENSG00000054965	FAM168A	protein_coding	1550	chr11	73432182	73472182	ENST00000310653	-	ENSG00000175582	RAB6A	protein_coding	1425
chr11	73882144	73922144	ENST00000328257	+	ENSG00000214517	PPME1	protein_coding	1675	chr11	74303575	74343575	ENST00000263681	+	ENSG00000077514	POLD3	protein_coding	875
chr11	74303575	74343575	ENST00000263681	+	ENSG00000077514	POLD3	protein_coding	875	chr11	74459913	74499913	ENST00000299563	+	ENSG00000166439	RNF169	protein_coding	825
chr11	76155967	76195967	ENST00000427574	+	ENSG00000158636	C11orf30	protein_coding	875	chr11	76571911	76611911	ENST00000534206	+	ENSG00000078124	ACER3	protein_coding	1125
chr11	76571911	76611911	ENST00000534206	+	ENSG00000078124	ACER3	protein_coding	1125	chr11	76777979	76817979	ENST00000531028	+	ENSG00000149260	CAPN5	protein_coding	1350
chr11	77492063	77532063	ENST00000308488	-	ENSG00000048649	RSF1	protein_coding	1525	chr11	77665724	77705724	ENST00000534064	-	ENSG00000149262	INTS4	protein_coding	1025
chr11	78245919	78285919	ENST00000529571	-	ENSG00000137513	NARS2	protein_coding	875	chr11	77665724	77705724	ENST00000534064	-	ENSG00000149262	INTS4	protein_coding	1025
chr11	82742965	82782965	ENST00000534141	-	ENSG00000137502	RAB30	protein_coding	1525	chr11	82904918	82944918	ENST00000260047	+	ENSG00000137494	ANKRD42	protein_coding	1150
chr11	85740924	85780924	ENST00000528398	-	ENSG00000073921	PICALM	protein_coding	1750	chr11	86748886	86788886	ENST00000340353	+	ENSG00000166575	TMEM135	protein_coding	950
chr11	88030955	88070955	ENST00000227266	-	ENSG00000109861	CTSC	protein_coding	1350	chr11	86748886	86788886	ENST00000340353	+	ENSG00000166575	TMEM135	protein_coding	950
chr11	93394805	93434805	ENST00000325212	+	ENSG00000166004	KIAA1731	protein_coding	1375	chr11	93862094	93902094	ENST00000227638	+	ENSG00000110218	PANX1	protein_coding	1475
chr11	94501508	94541508	ENST00000317829	+	ENSG00000166025	AMOTL1	protein_coding	1300	chr11	93862094	93902094	ENST00000227638	+	ENSG00000110218	PANX1	protein_coding	1475
chr11	95617459	95657459	ENST00000346299	-	ENSG00000087053	MTMR2	protein_coding	1550	chr11	96036382	96076382	ENST00000440572	-	ENSG00000184384	MAML2	protein_coding	1475
chr11	101981192	102021192	ENST00000282441	+	ENSG00000137693	YAP1	protein_coding	1325	chr11	102283775	102323775	ENST00000398136	-	ENSG00000152558	TMEM123	protein_coding	800
chr11	107288572	107328572	ENST00000433523	-	ENSG00000152404	CWF19L2	protein_coding	1500	chr11	107396472	107436472	ENST00000428149	-	ENSG00000137760	ALKBH8	protein_coding	1200
chr11	107879459	107919459	ENST00000393094	+	ENSG00000166266	CUL5	protein_coding	1675	chr11	108053369	108093369	ENST00000278612	-	ENSG00000149308	NPAT	protein_coding	1125
chr11	109964087	110004087	ENST00000278590	+	ENSG00000149289	ZC3H12C	protein_coding	1000	chr11	111473115	111513115	ENST00000304987	+	ENSG00000170145	SIK2	protein_coding	1175
chr11	111473115	111513115	ENST00000304987	+	ENSG00000170145	SIK2	protein_coding	1175	chr11	112097111	112137111	ENST00000531673	+	ENSG00000150787	PTS	protein_coding	875
chr11	113185251	113225251	ENST00000529221	+	ENSG00000149292	TTC12	protein_coding	575	chr11	113604533	113644533	ENST00000200135	-	ENSG00000086827	ZW10	protein_coding	1225
chr11	113604533	113644533	ENST00000200135	-	ENSG00000086827	ZW10	protein_coding	1225	chr11	113706292	113746292	ENST00000545540	-	ENSG00000048028	USP28	protein_coding	925
chr11	114271404	114311404	ENST00000544347	+	ENSG00000255663	RP11-212D19.4	protein_coding	1175	chr11	113706292	113746292	ENST00000545540	-	ENSG00000048028	USP28	protein_coding	925
chr11	116929153	116969153	ENST00000446921	-	ENSG00000160584	SIK3	protein_coding	1650	chr11	117198571	117238571	ENST00000278935	+	ENSG00000110274	CEP164	protein_coding	1250
chr11	118307205	118347205	ENST00000534358	+	ENSG00000118058	MLL	protein_coding	1475	chr11	118478330	118518330	ENST00000530994	+	ENSG00000019144	PHLDB1	protein_coding	150
chr11	118478330	118518330	ENST00000530994	+	ENSG00000019144	PHLDB1	protein_coding	150	chr11	118621845	118661845	ENST00000264018	-	ENSG00000110367	DDX6	protein_coding	1425
chr11	119076752	119116752	ENST00000264033	+	ENSG00000110395	CBL	protein_coding	1325	chr11	118621845	118661845	ENST00000264018	-	ENSG00000110367	DDX6	protein_coding	1425
chr11	120207787	120247787	ENST00000397843	+	ENSG00000196914	ARHGEF12	protein_coding	1400	chr11	119076752	119116752	ENST00000264033	+	ENSG00000110395	CBL	protein_coding	1325
chr11	122526383	122566383	ENST00000284273	+	ENSG00000154127	UBASH3B	protein_coding	1450	chr11	122753473	122793473	ENST00000227349	+	ENSG00000109944	C11orf63	protein_coding	1225
chr11	123025989	123065989	ENST00000448775	-	ENSG00000166250	CLMP	protein_coding	1400	chr11	122753473	122793473	ENST00000227349	+	ENSG00000109944	C11orf63	protein_coding	1225
chr11	126081309	126121309	ENST00000533050	+	ENSG00000197798	FAM118B	protein_coding	1475	chr11	128352205	128392205	ENST00000535549	-	ENSG00000134954	ETS1	protein_coding	1450
chr11	128352205	128392205	ENST00000535549	-	ENSG00000134954	ETS1	protein_coding	1450	chr11	129109219	129149219	ENST00000525234	-	ENSG00000134909	ARHGAP32	protein_coding	1150
chr11	129109219	129149219	ENST00000525234	-	ENSG00000134909	ARHGAP32	protein_coding	1150	chr11	129832730	129872730	ENST00000358825	-	ENSG00000170325	PRDM10	protein_coding	1350
chr11	129832730	129872730	ENST00000358825	-	ENSG00000170325	PRDM10	protein_coding	1350	chr11	129939732	129979732	ENST00000532456	+	ENSG00000084234	APLP2	protein_coding	1650
chr11	130144581	130184581	ENST00000525842	-	ENSG00000196323	ZBTB44	protein_coding	725	chr11	129939732	129979732	ENST00000532456	+	ENSG00000084234	APLP2	protein_coding	1650
chr11	131779938	131819938	ENST00000498764	+	ENSG00000182667	NTM	protein_coding	950	chr11	130144581	130184581	ENST00000525842	-	ENSG00000196323	ZBTB44	protein_coding	725
chr11	133938820	133978820	ENST00000299106	+	ENSG00000166086	JAM3	protein_coding	1200	chr11	134054426	134094426	ENST00000534532	-	ENSG00000151503	NCAPD3	protein_coding	1025
chr12	458620	498620	ENST00000399788	-	ENSG00000073614	KDM5A	protein_coding	1275	chr12	861759	901759	ENST00000535572	+	ENSG00000060237	WNK1	protein_coding	1625
chr12	861759	901759	ENST00000535572	+	ENSG00000060237	WNK1	protein_coding	1625	chr12	1100404	1140404	ENST00000347735	+	ENSG00000082805	ERC1	protein_coding	1300
chr12	1639057	1679057	ENST00000539198	+	ENSG00000111186	WNT5B	protein_coding	1600	chr12	2073677	2113677	ENST00000280665	-	ENSG00000151065	DCP1B	protein_coding	1175
chr12	2073677	2113677	ENST00000280665	-	ENSG00000151065	DCP1B	protein_coding	1175	chr12	2162464	2202464	ENST00000335762	+	ENSG00000151067	CACNA1C	protein_coding	1325
chr12	2986389	3026389	ENST00000535226	+	ENSG00000078246	TULP3	protein_coding	1975	chr12	3068496	3108496	ENST00000358409	+	ENSG00000197905	TEAD4	protein_coding	1150
chr12	3186521	3226521	ENST00000537971	+	ENSG00000011105	TSPAN9	protein_coding	925	chr12	3068496	3108496	ENST00000358409	+	ENSG00000197905	TEAD4	protein_coding	1150
chr12	3942608	3982608	ENST00000397096	-	ENSG00000111224	PARP11	protein_coding	975	chr12	3186521	3226521	ENST00000537971	+	ENSG00000011105	TSPAN9	protein_coding	925
chr12	4758273	4798273	ENST00000266544	+	ENSG00000139180	NDUFA9	protein_coding	1375	chr12	3942608	3982608	ENST00000397096	-	ENSG00000111224	PARP11	protein_coding	975
chr12	7085814	7125814	ENST00000261407	-	ENSG00000111684	LPCAT3	protein_coding	675	chr12	8849773	8889773	ENST00000541044	+	ENSG00000166532	RIMKLB	protein_coding	1225
chr12	11802788	11842788	ENST00000396373	+	ENSG00000139083	ETV6	protein_coding	1475	chr12	14518610	14558610	ENST00000539659	+	ENSG00000171681	ATF7IP	protein_coding	1175
chr12	14518610	14558610	ENST00000539659	+	ENSG00000171681	ATF7IP	protein_coding	1175	chr12	15902510	15942510	ENST00000281172	-	ENSG00000151491	EPS8	protein_coding	1600
chr12	15902510	15942510	ENST00000281172	-	ENSG00000151491	EPS8	protein_coding	1600	chr12	16064106	16104106	ENST00000428559	+	ENSG00000023697	DERA	protein_coding	1175
chr12	19282648	19322648	ENST00000309364	+	ENSG00000052126	PLEKHA5	protein_coding	1075	chr12	19592608	19632608	ENST00000398864	+	ENSG00000139154	AEBP2	protein_coding	1325
chr12	22657480	22697480	ENST00000333957	-	ENSG00000111731	KIAA0528	protein_coding	1000	chr12	22778009	22818009	ENST00000266517	+	ENSG00000139163	ETNK1	protein_coding	1550
chr12	25016009	25056009	ENST00000539282	-	ENSG00000060982	BCAT1	protein_coding	350	chr12	25062393	25102393	ENST00000261192	-	ENSG00000060982	BCAT1	protein_coding	1225
chr12	25363870	25403870	ENST00000557334	-	ENSG00000133703	KRAS	protein_coding	1475	chr12	25062393	25102393	ENST00000261192	-	ENSG00000060982	BCAT1	protein_coding	1225
chr12	26946131	26986131	ENST00000381340	-	ENSG00000123104	ITPR2	protein_coding	1225	chr12	27396901	27436901	ENST00000541191	+	ENSG00000211455	STK38L	protein_coding	1250
chr12	27396901	27436901	ENST00000541191	+	ENSG00000211455	STK38L	protein_coding	1250	chr12	27676364	27716364	ENST00000538433	+	ENSG00000110841	PPFIBP1	protein_coding	1300
chr12	28343360	28383360	ENST00000539107	+	ENSG00000123106	CCDC91	protein_coding	925	chr12	27676364	27716364	ENST00000538433	+	ENSG00000110841	PPFIBP1	protein_coding	1300
chr12	29302036	29342036	ENST00000551451	+	ENSG00000064763	FAR2	protein_coding	1000	chr12	29494086	29534086	ENST00000360150	-	ENSG00000087502	ERGIC2	protein_coding	1450
chr12	30808920	30848920	ENST00000256079	-	ENSG00000133704	IPO8	protein_coding	1575	chr12	31704031	31744031	ENST00000389082	-	ENSG00000170456	DENND5B	protein_coding	1650
chr12	31704031	31744031	ENST00000389082	-	ENSG00000170456	DENND5B	protein_coding	1650	chr12	32260085	32300085	ENST00000548411	+	ENSG00000151746	BICD1	protein_coding	1250
chr12	32260085	32300085	ENST00000548411	+	ENSG00000151746	BICD1	protein_coding	1250	chr12	32687258	32727258	ENST00000525053	+	ENSG00000139132	FGD4	protein_coding	1300
chr12	42592151	42632151	ENST00000547254	-	ENSG00000015153	YAF2	protein_coding	850	chr12	42719947	42759947	ENST00000337898	+	ENSG00000134283	PPHLN1	protein_coding	1475
chr12	44229886	44269886	ENST00000551577	+	ENSG00000139173	TMEM117	protein_coding	1175	chr12	45609770	45649770	ENST00000426898	+	ENSG00000177119	ANO6	protein_coding	1700
chr12	45609770	45649770	ENST00000426898	+	ENSG00000177119	ANO6	protein_coding	1700	chr12	46123448	46163448	ENST00000334344	+	ENSG00000189079	ARID2	protein_coding	1425
chr12	47473386	47513386	ENST00000546455	+	ENSG00000179715	PCED1B	protein_coding	850	chr12	48059844	48099844	ENST00000005386	-	ENSG00000005175	RPAP3	protein_coding	1250
chr12	48059844	48099844	ENST00000005386	-	ENSG00000005175	RPAP3	protein_coding	1250	chr12	48258823	48298823	ENST00000548664	-	ENSG00000111424	VDR	protein_coding	825
chr12	48460091	48500091	ENST00000549518	-	ENSG00000079387	SENP1	protein_coding	1525	chr12	48258823	48298823	ENST00000548664	-	ENSG00000111424	VDR	protein_coding	825
chr12	49311148	49351148	ENST00000398092	-	ENSG00000134287	ARF3	protein_coding	750	chr12	49760367	49800367	ENST00000550997	+	ENSG00000123352	SPATS2	protein_coding	1150
chr12	49760367	49800367	ENST00000550997	+	ENSG00000123352	SPATS2	protein_coding	1150	chr12	49962155	50002155	ENST00000551063	+	ENSG00000110844	PRPF40B	protein_coding	950
chr12	49962155	50002155	ENST00000551063	+	ENSG00000110844	PRPF40B	protein_coding	950	chr12	50061948	50101948	ENST00000550424	-	ENSG00000161791	FMNL3	protein_coding	1325
chr12	50505980	50545980	ENST00000548468	+	ENSG00000178449	COX14	protein_coding	1275	chr12	50576488	50616488	ENST00000552783	-	ENSG00000050405	LIMA1	protein_coding	1225
chr12	50794592	50834592	ENST00000293618	+	ENSG00000161813	LARP4	protein_coding	1575	chr12	50898768	50938768	ENST00000549620	+	ENSG00000066084	DIP2B	protein_coding	1600
chr12	51526926	51566926	ENST00000307660	-	ENSG00000135457	TFCP2	protein_coding	650	chr12	51818555	51858555	ENST00000453097	+	ENSG00000050438	SLC4A8	protein_coding	975
chr12	51818555	51858555	ENST00000453097	+	ENSG00000050438	SLC4A8	protein_coding	975	chr12	51984050	52024050	ENST00000546961	+	ENSG00000196876	SCN8A	protein_coding	1375
chr12	52345451	52385451	ENST00000257963	+	ENSG00000135503	ACVR1B	protein_coding	1475	chr12	51984050	52024050	ENST00000546961	+	ENSG00000196876	SCN8A	protein_coding	1375
chr12	53980199	54020199	ENST00000415113	-	ENSG00000170653	ATF7	protein_coding	1225	chr12	54379629	54419629	ENST00000513209	+	ENSG00000172789	HOXC5	protein_coding	1775
chr12	54379629	54419629	ENST00000513209	+	ENSG00000172789	HOXC5	protein_coding	1775	chr12	54633886	54673886	ENST00000209875	-	ENSG00000094916	CBX5	protein_coding	1050
chr12	56181330	56221330	ENST00000546837	-	ENSG00000257390	RP11-762I7.5	protein_coding	2075	chr12	56915713	56955713	ENST00000262031	+	ENSG00000076067	RBMS2	protein_coding	1600
chr12	56915713	56955713	ENST00000262031	+	ENSG00000076067	RBMS2	protein_coding	1600	chr12	57522282	57562282	ENST00000243077	+	ENSG00000123384	LRP1	protein_coding	950
chr12	57522282	57562282	ENST00000243077	+	ENSG00000123384	LRP1	protein_coding	950	chr12	57784788	57824788	ENST00000347140	-	ENSG00000179912	R3HDM2	protein_coding	1375
chr12	59274303	59314303	ENST00000320743	-	ENSG00000139263	LRIG3	protein_coding	1450	chr12	59989848	60029848	ENST00000552432	+	ENSG00000118596	SLC16A7	protein_coding	1450
chr12	62654119	62694119	ENST00000353364	+	ENSG00000135655	USP15	protein_coding	1600	chr12	62860597	62900597	ENST00000393630	+	ENSG00000061987	2013-12-02	protein_coding	1425
chr12	63288817	63328817	ENST00000228705	-	ENSG00000111110	PPM1H	protein_coding	1275	chr12	62860597	62900597	ENST00000393630	+	ENSG00000061987	2013-12-02	protein_coding	1425
chr12	64238073	64278073	ENST00000355086	+	ENSG00000196935	SRGAP1	protein_coding	1275	chr12	64798130	64838130	ENST00000332707	+	ENSG00000184575	XPOT	protein_coding	800
chr12	64798130	64838130	ENST00000332707	+	ENSG00000184575	XPOT	protein_coding	800	chr12	64845660	64885660	ENST00000331710	+	ENSG00000183735	TBK1	protein_coding	1450
chr12	65004293	65044293	ENST00000283172	+	ENSG00000153179	RASSF3	protein_coding	1050	chr12	65113227	65153227	ENST00000258145	-	ENSG00000135677	GNS	protein_coding	850
chr12	65563351	65603351	ENST00000308330	+	ENSG00000174106	LEMD3	protein_coding	1225	chr12	65672423	65712423	ENST00000308259	+	ENSG00000174099	MSRB3	protein_coding	1725
chr12	66180754	66220754	ENST00000489520	-	ENSG00000241749	RPSAP52	pseudogene	1100	chr12	65672423	65712423	ENST00000308259	+	ENSG00000174099	MSRB3	protein_coding	1725
chr12	66217911	66257911	ENST00000403681	+	ENSG00000149948	HMGA2	protein_coding	1775	chr12	65672423	65712423	ENST00000308259	+	ENSG00000174099	MSRB3	protein_coding	1725
chr12	69004619	69044619	ENST00000250559	+	ENSG00000127314	RAP1B	protein_coding	1625	chr12	69864129	69904129	ENST00000299293	+	ENSG00000166225	FRS2	protein_coding	1675
chr12	69864129	69904129	ENST00000299293	+	ENSG00000166225	FRS2	protein_coding	1675	chr12	70636774	70676774	ENST00000552231	+	ENSG00000111596	CNOT2	protein_coding	1425
chr12	72017749	72057749	ENST00000378743	-	ENSG00000133858	ZFC3H1	protein_coding	1325	chr12	72666463	72706463	ENST00000261180	+	ENSG00000072657	TRHDE	protein_coding	1725
chr12	76438813	76478813	ENST00000261182	-	ENSG00000187109	NAP1L1	protein_coding	1425	chr12	76653619	76693619	ENST00000550380	+	ENSG00000257219	RP11-54A9.1	processed_transcript	1325
chr12	76913589	76953589	ENST00000261183	-	ENSG00000091039	OSBPL8	protein_coding	1750	chr12	77157368	77197368	ENST00000426126	+	ENSG00000186908	ZDHHC17	protein_coding	1375
chr12	77419360	77459360	ENST00000322886	-	ENSG00000165891	E2F7	protein_coding	1275	chr12	77157368	77197368	ENST00000426126	+	ENSG00000186908	ZDHHC17	protein_coding	1375
chr12	79257773	79297773	ENST00000393240	+	ENSG00000067715	SYT1	protein_coding	1175	chr12	77419360	77459360	ENST00000322886	-	ENSG00000165891	E2F7	protein_coding	1275
chr12	81291704	81331704	ENST00000552864	-	ENSG00000111052	LIN7A	protein_coding	1325	chr12	82712175	82752175	ENST00000552377	-	ENSG00000133773	CCDC59	protein_coding	1100
chr12	88536073	88576073	ENST00000547034	+	ENSG00000139324	TMTC3	protein_coding	1050	chr12	88934628	88974628	ENST00000347404	-	ENSG00000049130	KITLG	protein_coding	1525
chr12	90063077	90103077	ENST00000551310	-	ENSG00000070961	ATP2B1	protein_coding	1675	chr12	88934628	88974628	ENST00000347404	-	ENSG00000049130	KITLG	protein_coding	1525
chr12	93283107	93323107	ENST00000322349	-	ENSG00000102189	EEA1	protein_coding	750	chr12	95357436	95397436	ENST00000552205	-	ENSG00000184752	NDUFA12	protein_coding	975
chr12	95357436	95397436	ENST00000552205	-	ENSG00000184752	NDUFA12	protein_coding	975	chr12	95571258	95611258	ENST00000451107	-	ENSG00000180263	FGD6	protein_coding	1625
chr12	95571258	95611258	ENST00000451107	-	ENSG00000180263	FGD6	protein_coding	1625	chr12	95611522	95651522	ENST00000436874	+	ENSG00000028203	VEZT	protein_coding	1400
chr12	95867296	95907296	ENST00000535095	+	ENSG00000111142	METAP2	protein_coding	1450	chr12	95611522	95651522	ENST00000436874	+	ENSG00000028203	VEZT	protein_coding	1400
chr12	96144930	96184930	ENST00000538383	-	ENSG00000074527	NTN4	protein_coding	975	chr12	96252747	96292747	ENST00000552085	+	ENSG00000139343	SNRPF	protein_coding	1525
chr12	96588160	96628160	ENST00000228741	+	ENSG00000111145	ELK3	protein_coding	1375	chr12	96754338	96794338	ENST00000261211	-	ENSG00000059758	CDK17	protein_coding	1475
chr12	97301001	97341001	ENST00000266742	+	ENSG00000139350	NEDD1	protein_coding	1525	chr12	96754338	96794338	ENST00000261211	-	ENSG00000059758	CDK17	protein_coding	1475
chr12	99038919	99078919	ENST00000551964	+	ENSG00000120868	APAF1	protein_coding	1575	chr12	100496626	100536626	ENST00000279907	-	ENSG00000111647	UHRF1BP1L	protein_coding	1775
chr12	100496626	100536626	ENST00000279907	-	ENSG00000111647	UHRF1BP1L	protein_coding	1775	chr12	100593643	100633643	ENST00000553038	+	ENSG00000075089	ACTR6	protein_coding	1300
chr12	100593643	100633643	ENST00000553038	+	ENSG00000075089	ACTR6	protein_coding	1300	chr12	100660918	100700918	ENST00000549687	+	ENSG00000136021	SCYL2	protein_coding	1375
chr12	100967461	101007461	ENST00000266754	+	ENSG00000139354	GAS2L3	protein_coding	1325	chr12	101111304	101151304	ENST00000549155	+	ENSG00000151572	ANO4	protein_coding	1500
chr12	101673887	101713887	ENST00000261637	+	ENSG00000120800	UTP20	protein_coding	875	chr12	102184716	102224716	ENST00000299314	-	ENSG00000111670	GNPTAB	protein_coding	1400
chr12	102184716	102224716	ENST00000299314	-	ENSG00000111670	GNPTAB	protein_coding	1400	chr12	102271129	102311129	ENST00000258534	+	ENSG00000136048	DRAM1	protein_coding	1575
chr12	102415927	102455927	ENST00000539515	-	ENSG00000120860	CCDC53	protein_coding	825	chr12	102473902	102513902	ENST00000552283	-	ENSG00000075188	NUP37	protein_coding	1125
chr12	102473902	102513902	ENST00000552283	-	ENSG00000075188	NUP37	protein_coding	1125	chr12	102513956	102553956	ENST00000327680	+	ENSG00000185480	PARPBP	protein_coding	1425
chr12	104194975	104234975	ENST00000392876	-	ENSG00000111696	NT5DC3	protein_coding	1325	chr12	104680460	104720460	ENST00000503506	+	ENSG00000198431	TXNRD1	protein_coding	1925
chr12	105501492	105541492	ENST00000332180	+	ENSG00000136051	KIAA1033	protein_coding	1375	chr12	105590016	105630016	ENST00000258530	-	ENSG00000136044	APPL2	protein_coding	1225
chr12	105724414	105764414	ENST00000443585	+	ENSG00000235162	C12orf75	protein_coding	1300	chr12	105590016	105630016	ENST00000258530	-	ENSG00000136044	APPL2	protein_coding	1225
chr12	106493811	106533811	ENST00000261402	-	ENSG00000074590	NUAK1	protein_coding	1750	chr12	107168373	107208373	ENST00000392837	+	ENSG00000111785	RIC8B	protein_coding	1075
chr12	107168373	107208373	ENST00000392837	+	ENSG00000111785	RIC8B	protein_coding	1075	chr12	107447607	107487607	ENST00000008527	-	ENSG00000008405	CRY1	protein_coding	1650
chr12	109085372	109125372	ENST00000261401	-	ENSG00000110880	CORO1C	protein_coding	1550	chr12	109211366	109251366	ENST00000551165	-	ENSG00000084112	SSH1	protein_coding	1175
chr12	109915207	109955207	ENST00000434735	+	ENSG00000151148	UBE3B	protein_coding	1350	chr12	110231212	110271212	ENST00000346520	-	ENSG00000111199	TRPV4	protein_coding	725
chr12	110231212	110271212	ENST00000346520	-	ENSG00000111199	TRPV4	protein_coding	725	chr12	110394194	110434194	ENST00000338373	-	ENSG00000139436	GIT2	protein_coding	1675
chr12	110394194	110434194	ENST00000338373	-	ENSG00000139436	GIT2	protein_coding	1675	chr12	110437328	110477328	ENST00000261739	+	ENSG00000076513	ANKRD13A	protein_coding	1400
chr12	110718921	110758921	ENST00000308664	+	ENSG00000174437	ATP2A2	protein_coding	1275	chr12	110981125	111021125	ENST00000354300	-	ENSG00000196850	PPTC7	protein_coding	1175
chr12	111843752	111883752	ENST00000341259	+	ENSG00000111252	SH2B3	protein_coding	1500	chr12	111997480	112037480	ENST00000550104	-	ENSG00000204842	ATXN2	protein_coding	1575
chr12	112279782	112319782	ENST00000550735	+	ENSG00000089022	MAPKAPK5	protein_coding	1100	chr12	112506826	112546826	ENST00000261745	-	ENSG00000111300	NAA25	protein_coding	1325
chr12	112779896	112819896	ENST00000430131	-	ENSG00000173064	C12orf51	protein_coding	1350	chr12	112856713	112896713	ENST00000392597	+	ENSG00000179295	PTPN11	protein_coding	1500
chr12	113658855	113698855	ENST00000552642	+	ENSG00000186815	TPCN1	protein_coding	650	chr12	114364176	114404176	ENST00000261741	-	ENSG00000122965	RBM19	protein_coding	875
chr12	114364176	114404176	ENST00000261741	-	ENSG00000122965	RBM19	protein_coding	875	chr12	114806247	114846247	ENST00000310346	-	ENSG00000089225	TBX5	protein_coding	1850
chr12	116675143	116715143	ENST00000281928	-	ENSG00000123066	MED13L	protein_coding	1600	chr12	117348761	117388761	ENST00000309909	+	ENSG00000174989	FBXW8	protein_coding	1525
chr12	117348761	117388761	ENST00000309909	+	ENSG00000174989	FBXW8	protein_coding	1525	chr12	117588336	117628336	ENST00000427718	-	ENSG00000135108	FBXO21	protein_coding	775
chr12	118770750	118810750	ENST00000392533	-	ENSG00000135090	TAOK3	protein_coding	1750	chr12	117588336	117628336	ENST00000427718	-	ENSG00000135108	FBXO21	protein_coding	775
chr12	120275095	120315095	ENST00000392521	-	ENSG00000122966	CIT	protein_coding	1025	chr12	120663574	120703574	ENST00000228307	-	ENSG00000089159	PXN	protein_coding	1400
chr12	121302174	121342174	ENST00000353487	-	ENSG00000157837	SPPL3	protein_coding	1375	chr12	121750265	121790265	ENST00000261819	-	ENSG00000089053	ANAPC5	protein_coding	1075
chr12	122516628	122556628	ENST00000319080	+	ENSG00000175727	MLXIP	protein_coding	1400	chr12	122867179	122907179	ENST00000537178	-	ENSG00000130779	CLIP1	protein_coding	1125
chr12	123978265	124018265	ENST00000376874	-	ENSG00000188026	RILPL1	protein_coding	2525	chr12	125012135	125052135	ENST00000542565	-	ENSG00000196498	NCOR2	protein_coding	1050
chr12	125012135	125052135	ENST00000542565	-	ENSG00000196498	NCOR2	protein_coding	1050	chr12	125308463	125348463	ENST00000339570	-	ENSG00000073060	SCARB1	protein_coding	500
chr12	125308463	125348463	ENST00000339570	-	ENSG00000073060	SCARB1	protein_coding	500	chr12	125433668	125473668	ENST00000539298	-	ENSG00000150990	DHX37	protein_coding	900
chr12	125433668	125473668	ENST00000539298	-	ENSG00000150990	DHX37	protein_coding	900	chr12	125549925	125589925	ENST00000316519	+	ENSG00000081760	AACS	protein_coding	1200
chr12	132195634	132235634	ENST00000261674	+	ENSG00000061936	SFSWAP	protein_coding	1425	chr12	132434505	132474505	ENST00000537902	+	ENSG00000183495	EP400	protein_coding	1475
chr12	133223945	133263945	ENST00000320574	-	ENSG00000177084	POLE	protein_coding	1250	chr12	133365439	133405439	ENST00000456883	-	ENSG00000090615	GOLGA3	protein_coding	700
chr12	133365439	133405439	ENST00000456883	-	ENSG00000090615	GOLGA3	protein_coding	700	chr12	133424209	133464209	ENST00000450056	-	ENSG00000072609	CHFR	protein_coding	900
chr12	133492890	133532890	ENST00000536932	-	ENSG00000256429	RP11-46H11.5	processed_transcript	475	chr12	133424209	133464209	ENST00000450056	-	ENSG00000072609	CHFR	protein_coding	900
chr13	20317082	20357082	ENST00000492741	-	ENSG00000121390	PSPC1	protein_coding	1575	chr13	20532810	20572810	ENST00000456228	+	ENSG00000121741	ZMYM2	protein_coding	1350
chr13	21059996	21099996	ENST00000382812	-	ENSG00000165475	CRYL1	protein_coding	900	chr13	21140585	21180585	ENST00000382778	+	ENSG00000032742	IFT88	protein_coding	1150
chr13	21437187	21477187	ENST00000490513	-	ENSG00000132953	XPO4	protein_coding	1475	chr13	21140585	21180585	ENST00000382778	+	ENSG00000032742	IFT88	protein_coding	1150
chr13	21993509	22033509	ENST00000400590	-	ENSG00000180776	ZDHHC20	protein_coding	1025	chr13	22138353	22178353	ENST00000382374	-	ENSG00000165487	EFHA1	protein_coding	950
chr13	23909682	23949682	ENST00000402364	-	ENSG00000151835	SACS	protein_coding	1100	chr13	23967841	24007841	ENST00000382298	-	ENSG00000151835	SACS	protein_coding	1200
chr13	24144509	24184509	ENST00000248484	+	ENSG00000127863	TNFRSF19	protein_coding	1950	chr13	23967841	24007841	ENST00000382298	-	ENSG00000151835	SACS	protein_coding	1200
chr13	25046948	25086948	ENST00000381989	-	ENSG00000102699	PARP4	protein_coding	775	chr13	25822147	25862147	ENST00000381801	-	ENSG00000139505	MTMR6	protein_coding	1325
chr13	25822147	25862147	ENST00000381801	-	ENSG00000139505	MTMR6	protein_coding	1325	chr13	25875662	25915662	ENST00000381736	+	ENSG00000139496	NUPL1	protein_coding	1225
chr13	26756398	26796398	ENST00000468480	-	ENSG00000127870	RNF6	protein_coding	1150	chr13	26828276	26868276	ENST00000381527	+	ENSG00000132964	CDK8	protein_coding	1425
chr13	27131840	27171840	ENST00000361042	+	ENSG00000132970	WASF3	protein_coding	1475	chr13	26828276	26868276	ENST00000381527	+	ENSG00000132964	CDK8	protein_coding	1425
chr13	27706033	27746033	ENST00000282344	-	ENSG00000152484	USP12	protein_coding	1500	chr13	28154541	28194541	ENST00000316334	-	ENSG00000139517	LNX2	protein_coding	1475
chr13	28712643	28752643	ENST00000503791	+	ENSG00000152520	PAN3	protein_coding	1600	chr13	29029265	29069265	ENST00000539099	-	ENSG00000102755	FLT1	protein_coding	1675
chr13	30129825	30169825	ENST00000380752	-	ENSG00000139514	SLC7A1	protein_coding	1550	chr13	30384821	30424821	ENST00000380680	-	ENSG00000122042	UBL3	protein_coding	1875
chr13	30841621	30881621	ENST00000380615	-	ENSG00000102781	KATNAL1	protein_coding	1500	chr13	31191920	31231920	ENST00000255304	+	ENSG00000132952	USPL1	protein_coding	1275
chr13	31774073	31814073	ENST00000343307	+	ENSG00000187676	B3GALTL	protein_coding	800	chr13	31191920	31231920	ENST00000255304	+	ENSG00000132952	USPL1	protein_coding	1275
chr13	32605437	32645437	ENST00000380250	+	ENSG00000073910	FRY	protein_coding	1275	chr13	33072970	33112970	ENST00000505213	-	ENSG00000244754	N4BP2L2	protein_coding	1475
chr13	33072970	33112970	ENST00000505213	-	ENSG00000244754	N4BP2L2	protein_coding	1475	chr13	33160564	33200564	ENST00000315596	+	ENSG00000083642	PDS5B	protein_coding	1575
chr13	33884767	33924767	ENST00000567873	-	ENSG00000133121	STARD13	protein_coding	1175	chr13	34392206	34432206	ENST00000434425	+	ENSG00000133119	RFC3	protein_coding	1650
chr13	37454902	37494902	ENST00000483941	-	ENSG00000120693	SMAD9	protein_coding	1525	chr13	37593850	37633850	ENST00000360252	-	ENSG00000102710	FAM48A	protein_coding	1575
chr13	38404562	38444562	ENST00000447043	-	ENSG00000133107	TRPC4	protein_coding	1475	chr13	37593850	37633850	ENST00000360252	-	ENSG00000102710	FAM48A	protein_coding	1575
chr13	40137308	40177308	ENST00000379589	-	ENSG00000183722	LHFP	protein_coding	800	chr13	40229764	40269764	ENST00000416691	+	ENSG00000133103	COG6	protein_coding	1300
chr13	41200734	41240734	ENST00000379561	-	ENSG00000150907	FOXO1	protein_coding	1400	chr13	41595576	41635576	ENST00000405737	-	ENSG00000120690	ELF1	protein_coding	1300
chr13	41595576	41635576	ENST00000405737	-	ENSG00000120690	ELF1	protein_coding	1300	chr13	41885341	41925341	ENST00000379367	+	ENSG00000172766	NAA16	protein_coding	1825
chr13	42495256	42535256	ENST00000281496	-	ENSG00000102763	KIAA0564	protein_coding	1475	chr13	42614176	42654176	ENST00000540693	+	ENSG00000102780	DGKH	protein_coding	1900
chr13	43597339	43637339	ENST00000379221	+	ENSG00000120675	DNAJC15	protein_coding	1625	chr13	42614176	42654176	ENST00000540693	+	ENSG00000102780	DGKH	protein_coding	1900
chr13	45110701	45150701	ENST00000458659	-	ENSG00000102804	TSC22D1	protein_coding	675	chr13	45523618	45563618	ENST00000379161	-	ENSG00000083635	NUFIP1	protein_coding	1550
chr13	45523618	45563618	ENST00000379161	-	ENSG00000083635	NUFIP1	protein_coding	1550	chr13	45563755	45603755	ENST00000361121	+	ENSG00000133114	KIAA1704	protein_coding	1500
chr13	45694650	45734650	ENST00000340473	+	ENSG00000188342	GTF2F2	protein_coding	1425	chr13	45563755	45603755	ENST00000361121	+	ENSG00000133114	KIAA1704	protein_coding	1500
chr13	45915480	45955480	ENST00000517509	+	ENSG00000170919	TPT1-AS1	lincRNA	725	chr13	45694650	45734650	ENST00000340473	+	ENSG00000188342	GTF2F2	protein_coding	1425
chr13	46586894	46626894	ENST00000282007	-	ENSG00000123200	ZC3H13	protein_coding	1375	chr13	47127303	47167303	ENST00000311191	+	ENSG00000136141	LRCH1	protein_coding	1775
chr13	48535462	48575462	ENST00000378645	-	ENSG00000136143	SUCLA2	protein_coding	1450	chr13	48877887	48917887	ENST00000525036	+	ENSG00000139687	RB1	protein_coding	1325
chr13	48877887	48917887	ENST00000525036	+	ENSG00000139687	RB1	protein_coding	1325	chr13	49067369	49107369	ENST00000344532	-	ENSG00000136161	RCBTB2	protein_coding	1225
chr13	49550048	49590048	ENST00000492622	+	ENSG00000102531	FNDC3A	protein_coding	1550	chr13	49822061	49862061	ENST00000251108	+	ENSG00000102543	CDADC1	protein_coding	1325
chr13	49822061	49862061	ENST00000251108	+	ENSG00000102543	CDADC1	protein_coding	1325	chr13	50018429	50058429	ENST00000354234	+	ENSG00000136169	SETDB2	protein_coding	1050
chr13	50018429	50058429	ENST00000354234	+	ENSG00000136169	SETDB2	protein_coding	1050	chr13	50119719	50159719	ENST00000378302	-	ENSG00000136144	RCBTB1	protein_coding	1075
chr13	50327057	50367057	ENST00000261667	-	ENSG00000102753	KPNA3	protein_coding	1500	chr13	50119719	50159719	ENST00000378302	-	ENSG00000136144	RCBTB1	protein_coding	1075
chr13	50616114	50656114	ENST00000416253	-	ENSG00000231607	DLEU2	lincRNA	1625	chr13	50659856	50699856	ENST00000425586	-	ENSG00000231607	DLEU2	lincRNA	525
chr13	51483814	51523814	ENST00000336617	+	ENSG00000136104	RNASEH2B	protein_coding	1450	chr13	51987343	52027343	ENST00000398119	-	ENSG00000102786	INTS6	protein_coding	700
chr13	51987343	52027343	ENST00000398119	-	ENSG00000102786	INTS6	protein_coding	700	chr13	52158644	52198644	ENST00000298125	+	ENSG00000139668	WDFY2	protein_coding	1600
chr13	60698119	60738119	ENST00000400330	-	ENSG00000139734	DIAPH3	protein_coding	1675	chr13	60970591	61010591	ENST00000196169	+	ENSG00000083544	TDRD3	protein_coding	1075
chr13	73356197	73396197	ENST00000326291	+	ENSG00000083535	PIBF1	protein_coding	1675	chr13	76016250	76056250	ENST00000377625	-	ENSG00000136111	TBC1D4	protein_coding	1525
chr13	76016250	76056250	ENST00000377625	-	ENSG00000136111	TBC1D4	protein_coding	1525	chr13	77861179	77901179	ENST00000360084	-	ENSG00000005810	MYCBP2	protein_coding	1350
chr13	77861179	77901179	ENST00000360084	-	ENSG00000005810	MYCBP2	protein_coding	1350	chr13	79193314	79233314	ENST00000282003	-	ENSG00000152193	RNF219	protein_coding	975
chr13	79193314	79233314	ENST00000282003	-	ENSG00000152193	RNF219	protein_coding	975	chr13	79940350	79980350	ENST00000438737	-	ENSG00000139746	RBM26	protein_coding	1300
chr13	79940350	79980350	ENST00000438737	-	ENSG00000139746	RBM26	protein_coding	1300	chr13	80055287	80095287	ENST00000218652	+	ENSG00000102471	NDFIP2	protein_coding	1325
chr13	95913687	95953687	ENST00000412704	-	ENSG00000125257	ABCC4	protein_coding	1275	chr13	96256957	96296957	ENST00000376829	-	ENSG00000134874	DZIP1	protein_coding	775
chr13	96256957	96296957	ENST00000376829	-	ENSG00000134874	DZIP1	protein_coding	775	chr13	96329411	96369411	ENST00000376795	+	ENSG00000102580	DNAJC3	protein_coding	1275
chr13	96665736	96705736	ENST00000376714	-	ENSG00000102595	UGGT2	protein_coding	1675	chr13	96329411	96369411	ENST00000376795	+	ENSG00000102580	DNAJC3	protein_coding	1275
chr13	97873688	97913688	ENST00000397601	+	ENSG00000139793	MBNL2	protein_coding	1700	chr13	98628886	98668886	ENST00000490680	+	ENSG00000065150	IPO5	protein_coding	1650
chr13	98628886	98668886	ENST00000490680	+	ENSG00000065150	IPO5	protein_coding	1650	chr13	98795434	98835434	ENST00000376581	+	ENSG00000152767	FARP1	protein_coding	1325
chr13	99698879	99738879	ENST00000427887	-	ENSG00000088387	DOCK9	protein_coding	1375	chr13	99853028	99893028	ENST00000403766	+	ENSG00000134882	UBAC2	protein_coding	1500
chr13	100153671	100193671	ENST00000376387	+	ENSG00000125304	TM9SF2	protein_coding	1525	chr13	99853028	99893028	ENST00000403766	+	ENSG00000134882	UBAC2	protein_coding	1500
chr13	100741269	100781269	ENST00000376279	+	ENSG00000175198	PCCA	protein_coding	1425	chr13	100153671	100193671	ENST00000376387	+	ENSG00000125304	TM9SF2	protein_coding	1525
chr13	102104966	102144966	ENST00000376180	+	ENSG00000198542	ITGBL1	protein_coding	1675	chr13	103249353	103289353	ENST00000376065	+	ENSG00000134900	TPP2	protein_coding	1550
chr13	103249353	103289353	ENST00000376065	+	ENSG00000134900	TPP2	protein_coding	1550	chr13	103451399	103491399	ENST00000257336	+	ENSG00000134897	BIVM	protein_coding	975
chr13	110919496	110959496	ENST00000397198	-	ENSG00000187498	COL4A1	protein_coding	1400	chr13	111325950	111365950	ENST00000535398	-	ENSG00000134905	CARS2	protein_coding	1725
chr13	113202481	113242481	ENST00000261965	-	ENSG00000126216	TUBGCP3	protein_coding	1350	chr13	113862552	113902552	ENST00000375441	+	ENSG00000139842	CUL4A	protein_coding	1300
chr13	113862552	113902552	ENST00000375441	+	ENSG00000139842	CUL4A	protein_coding	1300	chr13	114145310	114185310	ENST00000434316	+	ENSG00000150403	TMCO3	protein_coding	1100
chr13	114145310	114185310	ENST00000434316	+	ENSG00000150403	TMCO3	protein_coding	1100	chr13	114239013	114279013	ENST00000538138	+	ENSG00000198176	TFDP1	protein_coding	750
chr13	114527046	114567046	ENST00000357389	-	ENSG00000183087	GAS6	protein_coding	1725	chr13	114239013	114279013	ENST00000538138	+	ENSG00000198176	TFDP1	protein_coding	750
chr13	114858086	114898086	ENST00000334062	-	ENSG00000185989	RASA3	protein_coding	900	chr13	114527046	114567046	ENST00000357389	-	ENSG00000183087	GAS6	protein_coding	1725
chr14	20841580	20881580	ENST00000262715	-	ENSG00000129566	TEP1	protein_coding	875	chr14	21697653	21737653	ENST00000336053	-	ENSG00000092199	HNRNPC	protein_coding	1100
chr14	21697653	21737653	ENST00000336053	-	ENSG00000092199	HNRNPC	protein_coding	1100	chr14	21884239	21924239	ENST00000557364	-	ENSG00000100888	CHD8	protein_coding	950
chr14	30356948	30396948	ENST00000331968	-	ENSG00000184304	PRKD1	protein_coding	1475	chr14	31028329	31068329	ENST00000206595	+	ENSG00000092140	G2E3	protein_coding	1600
chr14	31028329	31068329	ENST00000206595	+	ENSG00000092140	G2E3	protein_coding	1600	chr14	31455607	31495607	ENST00000355683	-	ENSG00000196792	STRN3	protein_coding	825
chr14	31455607	31495607	ENST00000355683	-	ENSG00000196792	STRN3	protein_coding	825	chr14	31637010	31677010	ENST00000553700	-	ENSG00000092148	HECTD1	protein_coding	1525
chr14	31849788	31889788	ENST00000543095	-	ENSG00000129493	HEATR5A	protein_coding	825	chr14	31637010	31677010	ENST00000553700	-	ENSG00000092148	HECTD1	protein_coding	1525
chr14	32546173	32586173	ENST00000556611	+	ENSG00000100852	ARHGAP5	protein_coding	1375	chr14	32963477	33003477	ENST00000554410	+	ENSG00000151320	AKAP6	protein_coding	1425
chr14	34891980	34931980	ENST00000551935	-	ENSG00000129521	EGLN3	protein_coding	1400	chr14	35059389	35099389	ENST00000362031	-	ENSG00000129515	SNX6	protein_coding	1225
chr14	35451163	35491163	ENST00000556994	+	ENSG00000100883	SRP54	protein_coding	1650	chr14	35059389	35099389	ENST00000362031	-	ENSG00000129515	SNX6	protein_coding	1225
chr14	36238510	36278510	ENST00000307138	-	ENSG00000174373	RALGAPA1	protein_coding	1125	chr14	35451163	35491163	ENST00000556994	+	ENSG00000100883	SRP54	protein_coding	1650
chr14	45431411	45471411	ENST00000361577	+	ENSG00000198718	FAM179B	protein_coding	1475	chr14	45682605	45722605	ENST00000310806	-	ENSG00000129534	MIS18BP1	protein_coding	1675
chr14	50658276	50698276	ENST00000216373	-	ENSG00000100485	SOS2	protein_coding	1350	chr14	50959327	50999327	ENST00000013125	-	ENSG00000012983	MAP4K5	protein_coding	1750
chr14	50959327	50999327	ENST00000013125	-	ENSG00000012983	MAP4K5	protein_coding	1750	chr14	51257839	51297839	ENST00000382041	-	ENSG00000100503	NIN	protein_coding	1125
chr14	52118576	52158576	ENST00000395718	+	ENSG00000139926	FRMD6	protein_coding	1575	chr14	52495712	52535712	ENST00000541773	-	ENSG00000087303	NID2	protein_coding	1000
chr14	53122618	53162618	ENST00000556039	-	ENSG00000197930	ERO1L	protein_coding	1600	chr14	53580000	53620000	ENST00000357758	-	ENSG00000100523	DDHD1	protein_coding	1225
chr14	55618396	55658396	ENST00000247191	-	ENSG00000126787	DLGAP5	protein_coding	1250	chr14	55738021	55778021	ENST00000313833	+	ENSG00000178974	FBXO34	protein_coding	1550
chr14	57046338	57086338	ENST00000556422	+	ENSG00000070269	C14orf101	protein_coding	1300	chr14	57695726	57735726	ENST00000413566	-	ENSG00000070367	EXOC5	protein_coding	1300
chr14	58724857	58764857	ENST00000554218	-	ENSG00000139971	C14orf37	protein_coding	1075	chr14	58765103	58805103	ENST00000355431	+	ENSG00000032219	ARID4A	protein_coding	1375
chr14	61201480	61241480	ENST00000261245	+	ENSG00000020426	MNAT1	protein_coding	1150	chr14	62162258	62202258	ENST00000337138	+	ENSG00000100644	HIF1A	protein_coding	1175
chr14	63970092	64010092	ENST00000337537	-	ENSG00000154001	PPP2R5E	protein_coding	1350	chr14	64154757	64194757	ENST00000247225	-	ENSG00000126821	SGPP1	protein_coding	1500
chr14	64854749	64894749	ENST00000545908	+	ENSG00000100714	MTHFD1	protein_coding	1175	chr14	64931931	64971931	ENST00000555220	-	ENSG00000089775	ZBTB25	protein_coding	1250
chr14	65171154	65211154	ENST00000247226	+	ENSG00000126822	PLEKHG3	protein_coding	1400	chr14	65381203	65421203	ENST00000542227	+	ENSG00000125954	CHURC1-FNTB	protein_coding	1675
chr14	65381203	65421203	ENST00000542227	+	ENSG00000125954	CHURC1-FNTB	protein_coding	1675	chr14	65453438	65493438	ENST00000246166	+	ENSG00000257365	FNTB	protein_coding	1200
chr14	65529105	65569105	ENST00000341653	-	ENSG00000125952	MAX	protein_coding	1325	chr14	65453438	65493438	ENST00000246166	+	ENSG00000257365	FNTB	protein_coding	1200
chr14	65877310	65917310	ENST00000360689	+	ENSG00000033170	FUT8	protein_coding	1200	chr14	65529105	65569105	ENST00000341653	-	ENSG00000125952	MAX	protein_coding	1325
chr14	67707826	67747826	ENST00000261681	+	ENSG00000072415	MPP5	protein_coding	1425	chr14	68243306	68283306	ENST00000347230	-	ENSG00000072121	ZFYVE26	protein_coding	900
chr14	69406157	69446157	ENST00000193403	-	ENSG00000072110	ACTN1	protein_coding	1625	chr14	69579843	69619843	ENST00000341516	-	ENSG00000139990	DCAF5	protein_coding	1325
chr14	69864732	69904732	ENST00000556125	+	ENSG00000029364	SLC39A9	protein_coding	1375	chr14	70078313	70118313	ENST00000342745	+	ENSG00000100647	KIAA0247	protein_coding	1425
chr14	71374122	71414122	ENST00000238570	+	ENSG00000100731	PCNX	protein_coding	1575	chr14	71787166	71827166	ENST00000555989	+	ENSG00000197555	SIPA1L1	protein_coding	1400
chr14	73320809	73360809	ENST00000540281	-	ENSG00000205683	DPF3	protein_coding	1225	chr14	73453920	73493920	ENST00000556143	-	ENSG00000165861	ZFYVE1	protein_coding	1025
chr14	73453920	73493920	ENST00000556143	-	ENSG00000165861	ZFYVE1	protein_coding	1025	chr14	73525144	73565144	ENST00000261973	+	ENSG00000119707	RBM25	protein_coding	1825
chr14	74551499	74591499	ENST00000555028	+	ENSG00000205659	LIN52	protein_coding	1375	chr14	75139818	75179818	ENST00000356357	-	ENSG00000119682	KIAA0317	protein_coding	1575
chr14	75139818	75179818	ENST00000356357	-	ENSG00000119682	KIAA0317	protein_coding	1575	chr14	75230069	75270069	ENST00000552421	+	ENSG00000119596	YLPM1	protein_coding	1375
chr14	75603334	75643334	ENST00000303575	-	ENSG00000170348	TMED10	protein_coding	1775	chr14	75894419	75934419	ENST00000419727	+	ENSG00000140044	JDP2	protein_coding	1250
chr14	75894419	75934419	ENST00000419727	+	ENSG00000140044	JDP2	protein_coding	1250	chr14	76127335	76167335	ENST00000557003	+	ENSG00000119685	TTLL5	protein_coding	1075
chr14	76452096	76492096	ENST00000314067	+	ENSG00000119650	IFT43	protein_coding	1150	chr14	76618259	76658259	ENST00000554375	+	ENSG00000089916	C14orf118	protein_coding	1425
chr14	76618259	76658259	ENST00000554375	+	ENSG00000089916	C14orf118	protein_coding	1425	chr14	76662251	76702251	ENST00000556372	+	ENSG00000089916	C14orf118	protein_coding	1125
chr14	77564654	77604654	ENST00000557752	+	ENSG00000259164	RP11-463C8.4	protein_coding	1425	chr14	77747227	77787227	ENST00000261534	-	ENSG00000009830	POMT2	protein_coding	2025
chr14	78043116	78083116	ENST00000216484	-	ENSG00000100596	SPTLC2	protein_coding	1475	chr14	78174446	78214446	ENST00000557431	+	ENSG00000119705	SLIRP	protein_coding	1300
chr14	78187550	78227550	ENST00000556428	-	ENSG00000100603	SNW1	protein_coding	1275	chr14	78043116	78083116	ENST00000216484	-	ENSG00000100596	SPTLC2	protein_coding	1475
chr14	81647575	81687575	ENST00000434192	-	ENSG00000165417	GTF2A1	protein_coding	1250	chr14	81960205	82000205	ENST00000336735	-	ENSG00000071537	SEL1L	protein_coding	1300
chr14	85996488	86036488	ENST00000330753	+	ENSG00000185070	FLRT2	protein_coding	1400	chr14	89029253	89069253	ENST00000359301	+	ENSG00000100722	ZC3H14	protein_coding	900
chr14	89029253	89069253	ENST00000359301	+	ENSG00000100722	ZC3H14	protein_coding	900	chr14	89290968	89330968	ENST00000345383	+	ENSG00000165533	TTC8	protein_coding	1375
chr14	90045493	90085493	ENST00000555353	-	ENSG00000053254	FOXN3	protein_coding	950	chr14	90421283	90461283	ENST00000554976	+	ENSG00000042088	TDP1	protein_coding	1225
chr14	90421283	90461283	ENST00000554976	+	ENSG00000042088	TDP1	protein_coding	1225	chr14	90758481	90798481	ENST00000354366	-	ENSG00000119720	C14orf102	protein_coding	1325
chr14	91242823	91282823	ENST00000553948	-	ENSG00000165914	TTC7B	protein_coding	1050	chr14	90758481	90798481	ENST00000354366	-	ENSG00000119720	C14orf102	protein_coding	1325
chr14	91936824	91976824	ENST00000554390	-	ENSG00000100796	SMEK1	protein_coding	1450	chr14	92374167	92414167	ENST00000342058	-	ENSG00000140092	FBLN5	protein_coding	1250
chr14	92374167	92414167	ENST00000342058	-	ENSG00000140092	FBLN5	protein_coding	1250	chr14	92588281	92628281	ENST00000298875	+	ENSG00000165934	CPSF2	protein_coding	800
chr14	92980118	93020118	ENST00000216487	+	ENSG00000100599	RIN3	protein_coding	1250	chr14	93260576	93300576	ENST00000163416	+	ENSG00000066455	GOLGA5	protein_coding	1225
chr14	93542665	93582665	ENST00000557309	-	ENSG00000100605	ITPK1	protein_coding	1025	chr14	93759438	93799438	ENST00000298896	-	ENSG00000011114	BTBD7	protein_coding	1550
chr14	96505661	96545661	ENST00000555004	+	ENSG00000227051	C14orf132	protein_coding	1000	chr14	96671181	96711181	ENST00000553811	+	ENSG00000258691	RP11-404P21.8	protein_coding	1275
chr14	96671181	96711181	ENST00000553811	+	ENSG00000258691	RP11-404P21.8	protein_coding	1275	chr14	96790207	96830207	ENST00000359933	-	ENSG00000066739	ATG2B	protein_coding	975
chr14	96968710	97008710	ENST00000216277	+	ENSG00000090060	PAPOLA	protein_coding	1525	chr14	96790207	96830207	ENST00000359933	-	ENSG00000066739	ATG2B	protein_coding	975
chr14	97263641	97303641	ENST00000216639	+	ENSG00000100749	VRK1	protein_coding	1525	chr14	96968710	97008710	ENST00000216277	+	ENSG00000090060	PAPOLA	protein_coding	1525
chr14	99907216	99947216	ENST00000331768	-	ENSG00000183576	SETD3	protein_coding	1325	chr14	99947761	99987761	ENST00000555049	+	ENSG00000090061	CCNK	protein_coding	1500
chr14	100030363	100070363	ENST00000380243	-	ENSG00000205476	CCDC85C	protein_coding	1600	chr14	99947761	99987761	ENST00000555049	+	ENSG00000090061	CCNK	protein_coding	1500
chr14	100259021	100299021	ENST00000556835	+	ENSG00000066629	EML1	protein_coding	1225	chr14	100030363	100070363	ENST00000380243	-	ENSG00000205476	CCDC85C	protein_coding	1600
chr14	100705322	100745322	ENST00000262238	+	ENSG00000100811	YY1	protein_coding	1500	chr14	100803142	100843142	ENST00000355338	-	ENSG00000140105	WARS	protein_coding	775
chr14	100842755	100882755	ENST00000555775	+	ENSG00000176473	WDR25	protein_coding	900	chr14	100705322	100745322	ENST00000262238	+	ENSG00000100811	YY1	protein_coding	1500
chr14	102276140	102316140	ENST00000350249	+	ENSG00000078304	PPP2R5C	protein_coding	1500	chr14	102430865	102470865	ENST00000360184	+	ENSG00000197102	DYNC1H1	protein_coding	1750
chr14	102605840	102645840	ENST00000557485	+	ENSG00000140153	WDR20	protein_coding	1625	chr14	102731537	102771537	ENST00000361847	-	ENSG00000080823	MOK	protein_coding	1050
chr14	102731537	102771537	ENST00000361847	-	ENSG00000080823	MOK	protein_coding	1050	chr14	102829300	102869300	ENST00000359520	+	ENSG00000196663	TECPR2	protein_coding	1450
chr14	103058998	103098998	ENST00000262241	+	ENSG00000089902	RCOR1	protein_coding	1325	chr14	103243813	103283813	ENST00000560371	+	ENSG00000131323	TRAF3	protein_coding	1350
chr14	103483799	103523799	ENST00000361246	-	ENSG00000198752	CDC42BPB	protein_coding	1675	chr14	103243813	103283813	ENST00000560371	+	ENSG00000131323	TRAF3	protein_coding	1350
chr14	104095514	104135514	ENST00000348520	+	ENSG00000126214	KLC1	protein_coding	1450	chr14	103483799	103523799	ENST00000361246	-	ENSG00000198752	CDC42BPB	protein_coding	1675
chr14	105766900	105806900	ENST00000430725	+	ENSG00000179364	PACS2	protein_coding	2275	chr14	105886159	105926159	ENST00000331320	+	ENSG00000182979	MTA1	protein_coding	1125
chr15	22833395	22873395	ENST00000283645	+	ENSG00000153575	TUBGCP5	protein_coding	950	chr15	22892663	22932663	ENST00000313077	+	ENSG00000068793	CYFIP1	protein_coding	1475
chr15	23046436	23086436	ENST00000337435	-	ENSG00000170113	NIPA1	protein_coding	1025	chr15	22892663	22932663	ENST00000313077	+	ENSG00000068793	CYFIP1	protein_coding	1475
chr15	25200181	25240181	ENST00000557230	+	ENSG00000214265	SNURF	protein_coding	825	chr15	25644128	25684128	ENST00000232165	-	ENSG00000114062	UBE3A	protein_coding	1550
chr15	25644128	25684128	ENST00000232165	-	ENSG00000114062	UBE3A	protein_coding	1550	chr15	26068870	26108870	ENST00000555815	-	ENSG00000206190	ATP10A	protein_coding	1525
chr15	30074706	30114706	ENST00000346128	-	ENSG00000104067	TJP1	protein_coding	1425	chr15	30918403	30958403	ENST00000563110	+	ENSG00000187951	ARHGAP11B	protein_coding	750
chr15	30918403	30958403	ENST00000563110	+	ENSG00000187951	ARHGAP11B	protein_coding	750	chr15	31619058	31659058	ENST00000307145	+	ENSG00000169926	KLF13	protein_coding	1375
chr15	33320085	33360085	ENST00000334528	-	ENSG00000248905	FMN1	protein_coding	925	chr15	34291377	34331377	ENST00000306730	-	ENSG00000169857	AVEN	protein_coding	1375
chr15	36871812	36911812	ENST00000566621	+	ENSG00000186073	C15orf41	protein_coding	1525	chr15	37353504	37393504	ENST00000340545	-	ENSG00000134138	MEIS2	protein_coding	1525
chr15	38544527	38584527	ENST00000299084	+	ENSG00000166068	SPRED1	protein_coding	1500	chr15	37353504	37393504	ENST00000340545	-	ENSG00000134138	MEIS2	protein_coding	1525
chr15	40173093	40213093	ENST00000561100	-	ENSG00000166073	GPR176	protein_coding	1600	chr15	40226347	40266347	ENST00000559624	+	ENSG00000128829	EIF2AK4	protein_coding	1350
chr15	40886218	40926218	ENST00000346991	+	ENSG00000137812	CASC5	protein_coding	1650	chr15	41368552	41408552	ENST00000361937	-	ENSG00000128908	INO80	protein_coding	1425
chr15	41368552	41408552	ENST00000361937	-	ENSG00000128908	INO80	protein_coding	1425	chr15	41624892	41664892	ENST00000260359	+	ENSG00000137804	NUSAP1	protein_coding	1375
chr15	41624892	41664892	ENST00000260359	+	ENSG00000137804	NUSAP1	protein_coding	1375	chr15	41709302	41749302	ENST00000389629	+	ENSG00000137815	RTF1	protein_coding	1400
chr15	41952610	41992610	ENST00000545763	+	ENSG00000174197	MGA	protein_coding	1075	chr15	41709302	41749302	ENST00000389629	+	ENSG00000137815	RTF1	protein_coding	1400
chr15	42224776	42264776	ENST00000220325	-	ENSG00000103966	EHD4	protein_coding	1600	chr15	41952610	41992610	ENST00000545763	+	ENSG00000174197	MGA	protein_coding	1075
chr15	42525861	42565861	ENST00000389834	-	ENSG00000103978	TMEM87A	protein_coding	1400	chr15	42224776	42264776	ENST00000220325	-	ENSG00000103966	EHD4	protein_coding	1600
chr15	42867857	42907857	ENST00000290607	+	ENSG00000159433	STARD9	protein_coding	1325	chr15	42525861	42565861	ENST00000389834	-	ENSG00000103978	TMEM87A	protein_coding	1400
chr15	43358311	43398311	ENST00000546274	-	ENSG00000159459	UBR1	protein_coding	1325	chr15	43425722	43465722	ENST00000260403	+	ENSG00000137842	TMEM62	protein_coding	900
chr15	43745369	43785369	ENST00000382044	-	ENSG00000067369	TP53BP1	protein_coding	1000	chr15	43425722	43465722	ENST00000260403	+	ENSG00000137842	TMEM62	protein_coding	900
chr15	44119161	44159161	ENST00000263795	+	ENSG00000092470	WDR76	protein_coding	1375	chr15	43745369	43785369	ENST00000382044	-	ENSG00000067369	TP53BP1	protein_coding	1000
chr15	44580927	44620927	ENST00000559222	+	ENSG00000166734	CASC4	protein_coding	1325	chr15	44119161	44159161	ENST00000263795	+	ENSG00000092470	WDR76	protein_coding	1375
chr15	45879549	45919549	ENST00000564080	+	ENSG00000260170	RP11-96O20.4	protein_coding	1200	chr15	44580927	44620927	ENST00000559222	+	ENSG00000166734	CASC4	protein_coding	1325
chr15	48898046	48938046	ENST00000316623	-	ENSG00000166147	FBN1	protein_coding	1300	chr15	49063338	49103338	ENST00000380950	-	ENSG00000103995	CEP152	protein_coding	1525
chr15	49298760	49338760	ENST00000559471	-	ENSG00000138593	SECISBP2L	protein_coding	1675	chr15	49063338	49103338	ENST00000380950	-	ENSG00000103995	CEP152	protein_coding	1525
chr15	50607605	50647605	ENST00000380877	-	ENSG00000104064	GABPB1	protein_coding	1375	chr15	50939012	50979012	ENST00000313478	-	ENSG00000092439	TRPM7	protein_coding	1375
chr15	50939012	50979012	ENST00000313478	-	ENSG00000092439	TRPM7	protein_coding	1375	chr15	51200869	51240869	ENST00000561441	+	ENSG00000081014	AP4E1	protein_coding	1000
chr15	52781247	52821247	ENST00000399231	-	ENSG00000197535	MYO5A	protein_coding	1125	chr15	52931569	52971569	ENST00000566768	-	ENSG00000047346	FAM214A	protein_coding	1325
chr15	55542011	55582011	ENST00000567639	-	ENSG00000069974	RAB27A	protein_coding	1150	chr15	56245944	56285944	ENST00000435532	-	ENSG00000069869	NEDD4	protein_coding	1400
chr15	56245944	56285944	ENST00000435532	-	ENSG00000069869	NEDD4	protein_coding	1400	chr15	56495483	56535483	ENST00000423270	-	ENSG00000181827	RFX7	protein_coding	1350
chr15	56986284	57026284	ENST00000396245	-	ENSG00000137871	ZNF280D	protein_coding	1375	chr15	57210821	57250821	ENST00000438423	+	ENSG00000140262	TCF12	protein_coding	1425
chr15	57998910	58038910	ENST00000482852	+	ENSG00000255529	POLR2M	protein_coding	1175	chr15	57210821	57250821	ENST00000438423	+	ENSG00000140262	TCF12	protein_coding	1425
chr15	59002177	59042177	ENST00000260408	-	ENSG00000137845	ADAM10	protein_coding	1525	chr15	59279854	59319854	ENST00000348370	+	ENSG00000157450	RNF111	protein_coding	850
chr15	59625099	59665099	ENST00000288235	-	ENSG00000157483	MYO1E	protein_coding	1675	chr15	59279854	59319854	ENST00000348370	+	ENSG00000157450	RNF111	protein_coding	850
chr15	60650941	60690941	ENST00000559818	-	ENSG00000182718	ANXA2	protein_coding	1600	chr15	59625099	59665099	ENST00000288235	-	ENSG00000157483	MYO1E	protein_coding	1675
chr15	62312672	62352672	ENST00000249837	-	ENSG00000129003	VPS13C	protein_coding	1025	chr15	62682725	62722725	ENST00000561322	+	ENSG00000171914	TLN2	protein_coding	700
chr15	63481668	63521668	ENST00000321437	+	ENSG00000166128	RAB8B	protein_coding	1550	chr15	64086141	64126141	ENST00000561400	-	ENSG00000103657	HERC1	protein_coding	1525
chr15	64086141	64126141	ENST00000561400	-	ENSG00000103657	HERC1	protein_coding	1525	chr15	64608442	64648442	ENST00000303032	-	ENSG00000169118	CSNK1G1	protein_coding	1450
chr15	65134082	65174082	ENST00000502574	+	ENSG00000249240	AC069368.3	protein_coding	1725	chr15	64608442	64648442	ENST00000303032	-	ENSG00000169118	CSNK1G1	protein_coding	1450
chr15	65822756	65862756	ENST00000562901	+	ENSG00000074696	PTPLAD1	protein_coding	1350	chr15	66044631	66084631	ENST00000564674	-	ENSG00000174485	DENND4A	protein_coding	1250
chr15	66585555	66625555	ENST00000319194	+	ENSG00000166938	DIS3L	protein_coding	1050	chr15	66679155	66719155	ENST00000307102	+	ENSG00000169032	MAP2K1	protein_coding	1600
chr15	66797297	66837297	ENST00000307897	+	ENSG00000174442	ZWILCH	protein_coding	1125	chr15	66679155	66719155	ENST00000307102	+	ENSG00000169032	MAP2K1	protein_coding	1600
chr15	68346517	68386517	ENST00000249636	+	ENSG00000033800	PIAS1	protein_coding	1425	chr15	68684501	68724501	ENST00000423218	-	ENSG00000137809	ITGA11	protein_coding	1475
chr15	69073234	69113234	ENST00000465139	-	ENSG00000140350	ANP32A	protein_coding	1350	chr15	68684501	68724501	ENST00000423218	-	ENSG00000137809	ITGA11	protein_coding	1475
chr15	71015932	71055932	ENST00000322954	-	ENSG00000137831	UACA	protein_coding	1650	chr15	71184782	71224782	ENST00000561081	+	ENSG00000137821	LRRC49	protein_coding	1075
chr15	72370918	72410918	ENST00000564931	-	ENSG00000066933	MYO9A	protein_coding	1500	chr15	72766667	72806667	ENST00000379887	+	ENSG00000166233	ARIH1	protein_coding	1600
chr15	73886475	73926475	ENST00000351217	-	ENSG00000156642	NPTN	protein_coding	1850	chr15	74948633	74988633	ENST00000569561	-	ENSG00000179151	EDC3	protein_coding	1225
chr15	74948633	74988633	ENST00000569561	-	ENSG00000179151	EDC3	protein_coding	1225	chr15	75831630	75871630	ENST00000306726	-	ENSG00000169410	PTPN9	protein_coding	1650
chr15	77672486	77712486	ENST00000560626	-	ENSG00000173517	PEAK1	protein_coding	1750	chr15	77712754	77752754	ENST00000560498	+	ENSG00000140382	HMG20A	protein_coding	1475
chr15	78330066	78370066	ENST00000409931	-	ENSG00000167202	TBC1D2B	protein_coding	1325	chr15	78730531	78770531	ENST00000258886	+	ENSG00000136381	IREB2	protein_coding	1275
chr15	79603487	79643487	ENST00000424155	+	ENSG00000166557	TMED3	protein_coding	850	chr15	80351910	80391910	ENST00000261749	+	ENSG00000086666	ZFAND6	protein_coding	1825
chr15	80351910	80391910	ENST00000261749	+	ENSG00000086666	ZFAND6	protein_coding	1825	chr15	81071684	81111684	ENST00000220244	+	ENSG00000103888	KIAA1199	protein_coding	1575
chr15	83836770	83876770	ENST00000299633	-	ENSG00000166503	RP11-382A20.3	protein_coding	1800	chr15	85074026	85114026	ENST00000339094	-	ENSG00000189136	UBE2Q2P1	pseudogene	925
chr15	85074026	85114026	ENST00000339094	-	ENSG00000189136	UBE2Q2P1	pseudogene	925	chr15	85219947	85259947	ENST00000268220	-	ENSG00000140612	SEC11A	protein_coding	1375
chr15	85923818	85963818	ENST00000559362	+	ENSG00000170776	AKAP13	protein_coding	1725	chr15	85219947	85259947	ENST00000268220	-	ENSG00000140612	SEC11A	protein_coding	1375
chr15	89630690	89670690	ENST00000569411	+	ENSG00000140526	ABHD2	protein_coding	1500	chr15	89787180	89827180	ENST00000300027	+	ENSG00000140525	FANCI	protein_coding	1575
chr15	90931450	90971450	ENST00000268182	+	ENSG00000140575	IQGAP1	protein_coding	1625	chr15	91073157	91113157	ENST00000420329	+	ENSG00000140577	CRTC3	protein_coding	1300
chr15	92396925	92436925	ENST00000318445	+	ENSG00000176463	SLCO3A1	protein_coding	1050	chr15	93426526	93466526	ENST00000556722	+	ENSG00000173575	CHD2	protein_coding	950
chr15	99192200	99232200	ENST00000268035	+	ENSG00000140443	IGF1R	protein_coding	1475	chr15	99251060	99291060	ENST00000558355	+	ENSG00000140443	IGF1R	protein_coding	150
chr15	100105622	100145622	ENST00000560493	+	ENSG00000068305	MEF2A	protein_coding	1375	chr15	99251060	99291060	ENST00000558355	+	ENSG00000140443	IGF1R	protein_coding	150
chr15	101142739	101182739	ENST00000332783	+	ENSG00000183475	ASB7	protein_coding	1325	chr15	101459420	101499420	ENST00000388948	+	ENSG00000154237	LRRK1	protein_coding	1000
chr15	101459420	101499420	ENST00000388948	+	ENSG00000154237	LRRK1	protein_coding	1000	chr15	101752137	101792137	ENST00000254190	-	ENSG00000131873	CHSY1	protein_coding	1475
chr16	239462	279462	ENST00000337351	-	ENSG00000007392	LUC7L	protein_coding	1150	chr16	362673	402673	ENST00000481769	-	ENSG00000103126	AXIN1	protein_coding	800
chr16	362673	402673	ENST00000481769	-	ENSG00000103126	AXIN1	protein_coding	800	chr16	475619	515619	ENST00000262305	+	ENSG00000090565	RAB11FIP3	protein_coding	1150
chr16	1662386	1702386	ENST00000397412	+	ENSG00000007545	CRAMP1L	protein_coding	1400	chr16	1756184	1796184	ENST00000250894	+	ENSG00000138834	MAPK8IP3	protein_coding	1450
chr16	2097466	2137466	ENST00000219476	+	ENSG00000103197	TSC2	protein_coding	900	chr16	1756184	1796184	ENST00000250894	+	ENSG00000138834	MAPK8IP3	protein_coding	1450
chr16	3415112	3455112	ENST00000575785	+	ENSG00000262621	LA16c-306E5.2	processed_transcript	1350	chr16	3890727	3930727	ENST00000262367	-	ENSG00000005339	CREBBP	protein_coding	1475
chr16	3890727	3930727	ENST00000262367	-	ENSG00000005339	CREBBP	protein_coding	1475	chr16	4126186	4166186	ENST00000294016	-	ENSG00000162104	ADCY9	protein_coding	950
chr16	4674826	4714826	ENST00000399577	+	ENSG00000102858	MGRN1	protein_coding	1350	chr16	4857303	4897303	ENST00000321919	-	ENSG00000140632	GLYR1	protein_coding	850
chr16	10634555	10674555	ENST00000359543	-	ENSG00000213853	EMP2	protein_coding	1250	chr16	12857874	12897874	ENST00000381774	-	ENSG00000103381	CPPED1	protein_coding	1050
chr16	15528152	15568152	ENST00000300006	+	ENSG00000166780	C16orf45	protein_coding	1375	chr16	15697023	15737023	ENST00000396368	-	ENSG00000166783	KIAA0430	protein_coding	975
chr16	16043434	16083434	ENST00000349029	+	ENSG00000103222	ABCC1	protein_coding	1575	chr16	15697023	15737023	ENST00000396368	-	ENSG00000166783	KIAA0430	protein_coding	975
chr16	17524738	17564738	ENST00000261381	-	ENSG00000103489	XYLT1	protein_coding	1150	chr16	16043434	16083434	ENST00000349029	+	ENSG00000103222	ABCC1	protein_coding	1575
chr16	20817818	20857818	ENST00000566993	+	ENSG00000005189	AC004381.6	protein_coding	1025	chr16	22018959	22058959	ENST00000567004	+	ENSG00000185716	C16orf52	protein_coding	1575
chr16	22018959	22058959	ENST00000567004	+	ENSG00000185716	C16orf52	protein_coding	1575	chr16	22217603	22257603	ENST00000263026	+	ENSG00000103319	EEF2K	protein_coding	1300
chr16	23120591	23160591	ENST00000219689	-	ENSG00000103404	USP31	protein_coding	1150	chr16	23424501	23464501	ENST00000307149	-	ENSG00000168434	COG7	protein_coding	950
chr16	24741016	24781016	ENST00000315183	+	ENSG00000090905	TNRC6A	protein_coding	1600	chr16	24986987	25026987	ENST00000573449	-	ENSG00000140750	ARHGAP17	protein_coding	1650
chr16	24986987	25026987	ENST00000573449	-	ENSG00000140750	ARHGAP17	protein_coding	1650	chr16	25123050	25163050	ENST00000399069	+	ENSG00000205629	LCMT1	protein_coding	1300
chr16	27325234	27365234	ENST00000395762	+	ENSG00000077238	IL4R	protein_coding	975	chr16	27521234	27561234	ENST00000561623	-	ENSG00000077235	GTF3C1	protein_coding	1175
chr16	28183190	28223190	ENST00000304658	-	ENSG00000169180	XPO6	protein_coding	1175	chr16	27521234	27561234	ENST00000561623	-	ENSG00000077235	GTF3C1	protein_coding	1175
chr16	30710462	30750462	ENST00000262518	+	ENSG00000080603	SRCAP	protein_coding	925	chr16	30865623	30905623	ENST00000380317	-	ENSG00000099385	BCL7C	protein_coding	1050
chr16	31885079	31925079	ENST00000300870	+	ENSG00000185947	ZNF267	protein_coding	1375	chr16	30865623	30905623	ENST00000380317	-	ENSG00000099385	BCL7C	protein_coding	1050
chr16	46615538	46655538	ENST00000303383	-	ENSG00000171241	SHCBP1	protein_coding	1125	chr16	47455185	47495185	ENST00000544001	-	ENSG00000129636	ITFG1	protein_coding	1350
chr16	47455185	47495185	ENST00000544001	-	ENSG00000129636	ITFG1	protein_coding	1350	chr16	48278207	48318207	ENST00000285737	+	ENSG00000102910	LONP2	protein_coding	1475
chr16	47495034	47535034	ENST00000566037	+	ENSG00000102893	PHKB	protein_coding	1075	chr16	48278207	48318207	ENST00000285737	+	ENSG00000102910	LONP2	protein_coding	1475
chr16	50099852	50139852	ENST00000299192	+	ENSG00000155393	HEATR3	protein_coding	1025	chr16	50186829	50226829	ENST00000436909	+	ENSG00000121274	PAPD5	protein_coding	1425
chr16	50300427	50340427	ENST00000394697	+	ENSG00000121281	ADCY7	protein_coding	450	chr16	50362845	50402845	ENST00000394688	-	ENSG00000166164	BRD7	protein_coding	1600
chr16	50775961	50815961	ENST00000540145	+	ENSG00000083799	CYLD	protein_coding	1275	chr16	50362845	50402845	ENST00000394688	-	ENSG00000166164	BRD7	protein_coding	1600
chr16	53088945	53128945	ENST00000447540	+	ENSG00000177200	CHD9	protein_coding	1400	chr16	53737875	53777875	ENST00000471389	+	ENSG00000140718	FTO	protein_coding	1525
chr16	56764017	56804017	ENST00000308159	+	ENSG00000102900	NUP93	protein_coding	900	chr16	57126449	57166449	ENST00000290776	+	ENSG00000140848	CPNE2	protein_coding	925
chr16	57796935	57836935	ENST00000541240	-	ENSG00000140859	KIFC3	protein_coding	925	chr16	57126449	57166449	ENST00000290776	+	ENSG00000140848	CPNE2	protein_coding	925
chr16	58623790	58663790	ENST00000317147	-	ENSG00000125107	CNOT1	protein_coding	1350	chr16	57796935	57836935	ENST00000541240	-	ENSG00000140859	KIFC3	protein_coding	925
chr16	67063019	67103019	ENST00000561924	+	ENSG00000067955	CBFB	protein_coding	1300	chr16	67596310	67636310	ENST00000264010	+	ENSG00000102974	CTCF	protein_coding	1600
chr16	67596310	67636310	ENST00000264010	+	ENSG00000102974	CTCF	protein_coding	1600	chr16	67800555	67840555	ENST00000317506	-	ENSG00000141084	RANBP10	protein_coding	1050
chr16	68877509	68917509	ENST00000261778	+	ENSG00000103047	TMCO7	protein_coding	950	chr16	69221032	69261032	ENST00000336278	+	ENSG00000168807	SNTB2	protein_coding	1275
chr16	69221032	69261032	ENST00000336278	+	ENSG00000168807	SNTB2	protein_coding	1275	chr16	69458428	69498428	ENST00000512062	+	ENSG00000103018	CYB5B	protein_coding	1400
chr16	69458428	69498428	ENST00000512062	+	ENSG00000103018	CYB5B	protein_coding	1400	chr16	69598997	69638997	ENST00000426654	+	ENSG00000102908	NFAT5	protein_coding	1500
chr16	70557691	70597691	ENST00000302516	+	ENSG00000189091	SF3B3	protein_coding	1075	chr16	70795064	70835064	ENST00000261776	-	ENSG00000103043	VAC14	protein_coding	1125
chr16	71803104	71843104	ENST00000299980	-	ENSG00000166747	AP1G1	protein_coding	1450	chr16	70795064	70835064	ENST00000261776	-	ENSG00000103043	VAC14	protein_coding	1125
chr16	73053597	73093597	ENST00000397992	-	ENSG00000140836	ZFHX3	protein_coding	1900	chr16	71803104	71843104	ENST00000299980	-	ENSG00000166747	AP1G1	protein_coding	1450
chr16	74979046	75019046	ENST00000262144	-	ENSG00000103091	WDR59	protein_coding	325	chr16	75032928	75072928	ENST00000335325	+	ENSG00000186187	ZNRF1	protein_coding	1475
chr16	77822427	77862427	ENST00000302536	+	ENSG00000171724	VAT1L	protein_coding	1250	chr16	75032928	75072928	ENST00000335325	+	ENSG00000186187	ZNRF1	protein_coding	1475
chr16	80798226	80838226	ENST00000299564	-	ENSG00000166446	CDYL2	protein_coding	1125	chr16	81348557	81388557	ENST00000248272	+	ENSG00000127688	GAN	protein_coding	1250
chr16	81348557	81388557	ENST00000248272	+	ENSG00000127688	GAN	protein_coding	1250	chr16	81478775	81518775	ENST00000537098	+	ENSG00000153815	CMIP	protein_coding	1175
chr16	84110511	84150511	ENST00000343411	-	ENSG00000140943	MBTPS1	protein_coding	1000	chr16	84611683	84651683	ENST00000262428	-	ENSG00000103187	COTL1	protein_coding	1250
chr16	84611683	84651683	ENST00000262428	-	ENSG00000103187	COTL1	protein_coding	1250	chr16	84733584	84773584	ENST00000219473	+	ENSG00000103194	USP10	protein_coding	1700
chr16	85061375	85101375	ENST00000538274	+	ENSG00000135709	KIAA0513	protein_coding	775	chr16	84733584	84773584	ENST00000219473	+	ENSG00000103194	USP10	protein_coding	1700
chr16	85744689	85784689	ENST00000284245	-	ENSG00000154102	C16orf74	protein_coding	675	chr16	85061375	85101375	ENST00000538274	+	ENSG00000135709	KIAA0513	protein_coding	775
chr16	87485651	87525651	ENST00000268616	-	ENSG00000140948	ZCCHC14	protein_coding	750	chr16	87985038	88025038	ENST00000289484	+	ENSG00000172530	BANP	protein_coding	675
chr16	88636789	88676789	ENST00000301011	+	ENSG00000158545	ZC3H18	protein_coding	875	chr16	88811619	88851619	ENST00000301015	-	ENSG00000103335	PIEZO1	protein_coding	1125
chr16	88811619	88851619	ENST00000301015	-	ENSG00000103335	PIEZO1	protein_coding	1125	chr16	88883374	88923374	ENST00000268695	-	ENSG00000141012	GALNS	protein_coding	1500
chr16	89160217	89200217	ENST00000317447	+	ENSG00000176715	ACSF3	protein_coding	800	chr16	88883374	88923374	ENST00000268695	-	ENSG00000141012	GALNS	protein_coding	1500
chr16	89574811	89614811	ENST00000268704	+	ENSG00000197912	SPG7	protein_coding	1400	chr16	89843054	89883054	ENST00000389301	-	ENSG00000187741	FANCA	protein_coding	975
chr17	578096	618096	ENST00000437048	-	ENSG00000141252	VPS53	protein_coding	1150	chr17	843010	883010	ENST00000336868	-	ENSG00000167693	NXN	protein_coding	1175
chr17	843010	883010	ENST00000336868	-	ENSG00000167693	NXN	protein_coding	1175	chr17	972340	1012340	ENST00000291107	-	ENSG00000159842	ABR	protein_coding	375
chr17	1263672	1303672	ENST00000264335	-	ENSG00000108953	YWHAE	protein_coding	1550	chr17	1426110	1466110	ENST00000313486	-	ENSG00000174238	PITPNA	protein_coding	1075
chr17	1732996	1772996	ENST00000571058	+	ENSG00000132383	RPA1	protein_coding	1075	chr17	1426110	1466110	ENST00000313486	-	ENSG00000174238	PITPNA	protein_coding	1075
chr17	2167065	2207065	ENST00000263073	-	ENSG00000070366	SMG6	protein_coding	1250	chr17	2375185	2415185	ENST00000571669	-	ENSG00000127804	METTL16	protein_coding	1300
chr17	2375185	2415185	ENST00000571669	-	ENSG00000127804	METTL16	protein_coding	1300	chr17	2496504	2536504	ENST00000576586	+	ENSG00000007168	PAFAH1B1	protein_coding	1400
chr17	4006314	4046314	ENST00000574474	-	ENSG00000074755	ZZEF1	protein_coding	1250	chr17	4736683	4776683	ENST00000355280	+	ENSG00000141503	MINK1	protein_coding	1225
chr17	4736683	4776683	ENST00000355280	+	ENSG00000141503	MINK1	protein_coding	1225	chr17	5185558	5225558	ENST00000408982	+	ENSG00000029725	RABEP1	protein_coding	1375
chr17	6875657	6915657	ENST00000570562	-	ENSG00000215067	MIR497HG	protein_coding	1275	chr17	8339179	8379179	ENST00000299734	+	ENSG00000166579	NDEL1	protein_coding	1325
chr17	11924141	11964141	ENST00000353533	+	ENSG00000065559	MAP2K4	protein_coding	1425	chr17	13465244	13505244	ENST00000284110	-	ENSG00000153976	HS3ST3A1	protein_coding	1450
chr17	13465244	13505244	ENST00000284110	-	ENSG00000153976	HS3ST3A1	protein_coding	1450	chr17	13932775	13972775	ENST00000449363	-	ENSG00000223385	COX10-AS1	lincRNA	1175
chr17	13932775	13972775	ENST00000449363	-	ENSG00000223385	COX10-AS1	lincRNA	1175	chr17	13972846	14012846	ENST00000261643	+	ENSG00000006695	COX10	protein_coding	1325
chr17	14204400	14244400	ENST00000360954	+	ENSG00000125430	HS3ST3B1	protein_coding	1100	chr17	13972846	14012846	ENST00000261643	+	ENSG00000006695	COX10	protein_coding	1325
chr17	16120523	16160523	ENST00000581006	+	ENSG00000108474	PIGL	protein_coding	1075	chr17	16945859	16985859	ENST00000577514	+	ENSG00000133030	MPRIP	protein_coding	1575
chr17	16945859	16985859	ENST00000577514	+	ENSG00000133030	MPRIP	protein_coding	1575	chr17	17455022	17495022	ENST00000395781	-	ENSG00000133027	PEMT	protein_coding	700
chr17	17455022	17495022	ENST00000395781	-	ENSG00000133027	PEMT	protein_coding	700	chr17	17835736	17875736	ENST00000579586	-	ENSG00000175662	TOM1L2	protein_coding	1400
chr17	17835736	17875736	ENST00000579586	-	ENSG00000175662	TOM1L2	protein_coding	1400	chr17	17902482	17942482	ENST00000584205	-	ENSG00000171953	ATPAF2	protein_coding	750
chr17	20058651	20098651	ENST00000582063	+	ENSG00000128487	SPECC1	protein_coding	1350	chr17	20907073	20947073	ENST00000579645	-	ENSG00000124422	USP22	protein_coding	1675
chr17	26369182	26409182	ENST00000407008	+	ENSG00000087095	NLK	protein_coding	1275	chr17	26989109	27029109	ENST00000314616	+	ENSG00000109111	SUPT6H	protein_coding	1300
chr17	26989109	27029109	ENST00000314616	+	ENSG00000109111	SUPT6H	protein_coding	1300	chr17	27427397	27467397	ENST00000530254	-	ENSG00000196535	MYO18A	protein_coding	700
chr17	27427397	27467397	ENST00000530254	-	ENSG00000196535	MYO18A	protein_coding	700	chr17	27717482	27757482	ENST00000583121	+	ENSG00000160551	TAOK1	protein_coding	1350
chr17	28217191	28257191	ENST00000579040	-	ENSG00000141298	SSH2	protein_coding	1100	chr17	28579012	28619012	ENST00000261714	-	ENSG00000108578	BLMH	protein_coding	1225
chr17	28579012	28619012	ENST00000261714	-	ENSG00000108578	BLMH	protein_coding	1225	chr17	28804380	28844380	ENST00000225724	+	ENSG00000108587	GOSR1	protein_coding	1075
chr17	29421945	29461945	ENST00000358273	+	ENSG00000196712	NF1	protein_coding	1750	chr17	28804380	28844380	ENST00000225724	+	ENSG00000108587	GOSR1	protein_coding	1075
chr17	30188784	30228784	ENST00000261708	-	ENSG00000108651	UTP6	protein_coding	1050	chr17	30264037	30304037	ENST00000322652	+	ENSG00000178691	SUZ12	protein_coding	1650
chr17	30469473	30509473	ENST00000333942	+	ENSG00000126858	RHOT1	protein_coding	1525	chr17	30535321	30575321	ENST00000584852	+	ENSG00000126858	RHOT1	protein_coding	2850
chr17	31164195	31204195	ENST00000318217	-	ENSG00000176658	MYO1D	protein_coding	1300	chr17	30535321	30575321	ENST00000584852	+	ENSG00000126858	RHOT1	protein_coding	2850
chr17	34900781	34940781	ENST00000495023	+	ENSG00000005955	GGNBP2	protein_coding	1625	chr17	35306175	35346175	ENST00000225402	+	ENSG00000108270	AATF	protein_coding	1100
chr17	35306175	35346175	ENST00000225402	+	ENSG00000108270	AATF	protein_coding	1100	chr17	35676059	35716059	ENST00000394403	-	ENSG00000132142	ACACA	protein_coding	800
chr17	35676059	35716059	ENST00000394403	-	ENSG00000132142	ACACA	protein_coding	800	chr17	35766965	35806965	ENST00000394395	+	ENSG00000108264	TADA2A	protein_coding	875
chr17	36508111	36548111	ENST00000331159	+	ENSG00000174111	SOCS7	protein_coding	1400	chr17	36584662	36624662	ENST00000431231	+	ENSG00000225485	ARHGAP23	protein_coding	875
chr17	37026112	37066112	ENST00000318008	+	ENSG00000002834	LASP1	protein_coding	1625	chr17	36584662	36624662	ENST00000431231	+	ENSG00000225485	ARHGAP23	protein_coding	875
chr17	37567539	37607539	ENST00000300651	-	ENSG00000125686	MED1	protein_coding	1250	chr17	37617764	37657764	ENST00000584632	+	ENSG00000167258	CDK12	protein_coding	1050
chr17	38375556	38415556	ENST00000583268	+	ENSG00000171475	WIPF2	protein_coding	1325	chr17	37617764	37657764	ENST00000584632	+	ENSG00000167258	CDK12	protein_coding	1050
chr17	40035272	40075272	ENST00000353196	-	ENSG00000131473	ACLY	protein_coding	1000	chr17	40129715	40169715	ENST00000457167	-	ENSG00000168259	DNAJC7	protein_coding	1725
chr17	40500449	40540449	ENST00000389272	-	ENSG00000168610	STAT3	protein_coding	1375	chr17	40610862	40650862	ENST00000546249	+	ENSG00000033627	ATP6V0A1	protein_coding	1050
chr17	41322511	41362511	ENST00000422280	+	ENSG00000188554	NBR1	protein_coding	1000	chr17	41561331	41601331	ENST00000540306	+	ENSG00000067596	DHX8	protein_coding	1325
chr17	42161014	42201014	ENST00000393622	-	ENSG00000108840	HDAC5	protein_coding	2075	chr17	42540802	42580802	ENST00000335500	-	ENSG00000186566	GPATCH8	protein_coding	1450
chr17	42936993	42976993	ENST00000426333	-	ENSG00000108883	EFTUD2	protein_coding	1475	chr17	43138680	43178680	ENST00000258960	+	ENSG00000136448	NMT1	protein_coding	1075
chr17	43354414	43394414	ENST00000344686	-	ENSG00000006062	MAP3K14	protein_coding	1275	chr17	43138680	43178680	ENST00000258960	+	ENSG00000136448	NMT1	protein_coding	1075
chr17	44230272	44270272	ENST00000572904	-	ENSG00000120071	KANSL1	protein_coding	1200	chr17	43354414	43394414	ENST00000344686	-	ENSG00000006062	MAP3K14	protein_coding	1275
chr17	47074774	47114774	ENST00000290341	+	ENSG00000159217	IGF2BP1	protein_coding	1150	chr17	47399835	47439835	ENST00000362063	-	ENSG00000198740	ZNF652	protein_coding	1575
chr17	47399835	47439835	ENST00000362063	-	ENSG00000198740	ZNF652	protein_coding	1575	chr17	47715596	47755596	ENST00000504102	-	ENSG00000121067	SPOP	protein_coding	875
chr17	49158226	49198226	ENST00000357122	-	ENSG00000008294	SPAG9	protein_coding	1575	chr17	49297398	49337398	ENST00000405860	-	ENSG00000011258	MBTD1	protein_coding	1450
chr17	52977874	53017874	ENST00000575882	+	ENSG00000141198	TOM1L1	protein_coding	1300	chr17	54871257	54911257	ENST00000397861	-	ENSG00000214226	C17orf67	protein_coding	800
chr17	54871257	54911257	ENST00000397861	-	ENSG00000214226	C17orf67	protein_coding	800	chr17	55333212	55373212	ENST00000416426	+	ENSG00000153944	MSI2	protein_coding	1125
chr17	55992684	56032684	ENST00000577830	-	ENSG00000180891	CUEDC1	protein_coding	1225	chr17	55333212	55373212	ENST00000416426	+	ENSG00000153944	MSI2	protein_coding	1125
chr17	57192630	57232630	ENST00000330137	-	ENSG00000182628	SKA2	protein_coding	1375	chr17	57232860	57272860	ENST00000262293	+	ENSG00000068489	PRR11	protein_coding	1100
chr17	57697219	57737219	ENST00000393043	+	ENSG00000141367	CLTC	protein_coding	1575	chr17	57970447	58010447	ENST00000472940	+	ENSG00000108443	RPS6KB1	protein_coding	1475
chr17	58429586	58469586	ENST00000300896	-	ENSG00000170832	USP32	protein_coding	1125	chr17	58563580	58603580	ENST00000083182	-	ENSG00000062725	APPBP2	protein_coding	1475
chr17	58563580	58603580	ENST00000083182	-	ENSG00000062725	APPBP2	protein_coding	1475	chr17	58677554	58717554	ENST00000305921	+	ENSG00000170836	PPM1D	protein_coding	1325
chr17	60102643	60142643	ENST00000397786	-	ENSG00000108510	MED13	protein_coding	1425	chr17	58677554	58717554	ENST00000305921	+	ENSG00000170836	PPM1D	protein_coding	1325
chr17	61627822	61667822	ENST00000310827	+	ENSG00000136485	DCAF7	protein_coding	1475	chr17	61699775	61739775	ENST00000579585	+	ENSG00000198909	MAP3K3	protein_coding	1500
chr17	61851223	61891223	ENST00000578681	+	ENSG00000198231	DDX42	protein_coding	1375	chr17	61699775	61739775	ENST00000579585	+	ENSG00000198909	MAP3K3	protein_coding	1500
chr17	62167502	62207502	ENST00000584041	-	ENSG00000178607	ERN1	protein_coding	1050	chr17	62300661	62340661	ENST00000584379	-	ENSG00000136478	TEX2	protein_coding	1300
chr17	64148197	64188197	ENST00000535342	-	ENSG00000154240	CEP112	protein_coding	1525	chr17	64298754	64338754	ENST00000578063	+	ENSG00000154229	PRKCA	protein_coding	1225
chr17	65202105	65242105	ENST00000581159	-	ENSG00000198265	HELZ	protein_coding	1375	chr17	65373575	65413575	ENST00000580974	+	ENSG00000154217	PITPNC1	protein_coding	1200
chr17	65821640	65861640	ENST00000544778	+	ENSG00000171634	BPTF	protein_coding	1325	chr17	65373575	65413575	ENST00000580974	+	ENSG00000154217	PITPNC1	protein_coding	1200
chr17	71048832	71088832	ENST00000255559	-	ENSG00000133195	SLC39A11	protein_coding	575	chr17	72772622	72812622	ENST00000335464	+	ENSG00000109066	TMEM104	protein_coding	925
chr17	72772622	72812622	ENST00000335464	+	ENSG00000109066	TMEM104	protein_coding	925	chr17	73361790	73401790	ENST00000316615	-	ENSG00000177885	GRB2	protein_coding	1775
chr17	73361790	73401790	ENST00000316615	-	ENSG00000177885	GRB2	protein_coding	1775	chr17	73780681	73820681	ENST00000293218	+	ENSG00000132478	UNK	protein_coding	1250
chr17	74311010	74351010	ENST00000435555	-	ENSG00000161542	PRPSAP1	protein_coding	1550	chr17	74409288	74449288	ENST00000319380	-	ENSG00000175931	UBE2O	protein_coding	1375
chr17	75084831	75124831	ENST00000392476	+	ENSG00000129657	SEC14L1	protein_coding	1075	chr17	75137005	75177005	ENST00000430767	+	ENSG00000129657	SEC14L1	protein_coding	1475
chr17	75315597	75355597	ENST00000329047	+	ENSG00000184640	SEPT9	protein_coding	775	chr17	75137005	75177005	ENST00000430767	+	ENSG00000129657	SEC14L1	protein_coding	1475
chr17	76374735	76414735	ENST00000262764	+	ENSG00000087157	PGS1	protein_coding	1525	chr17	76796969	76836969	ENST00000312010	-	ENSG00000055483	USP36	protein_coding	1475
chr17	76796969	76836969	ENST00000312010	-	ENSG00000055483	USP36	protein_coding	1475	chr17	76881472	76921472	ENST00000262768	-	ENSG00000035862	TIMP2	protein_coding	1500
chr17	77969647	78009647	ENST00000310924	-	ENSG00000167291	TBC1D16	protein_coding	1025	chr17	78518619	78558619	ENST00000574767	+	ENSG00000141564	RPTOR	protein_coding	1300
chr17	79229105	79269105	ENST00000374759	-	ENSG00000157637	SLC38A10	protein_coding	600	chr17	79564172	79604172	ENST00000331134	-	ENSG00000182446	NPLOC4	protein_coding	1525
chr17	80130689	80170689	ENST00000392343	-	ENSG00000176155	CCDC57	protein_coding	650	chr17	80477589	80517589	ENST00000473637	+	ENSG00000141568	FOXK2	protein_coding	1750
chr17	80477589	80517589	ENST00000473637	+	ENSG00000141568	FOXK2	protein_coding	1750	chr17	80709940	80749940	ENST00000355528	+	ENSG00000141556	TBCD	protein_coding	650
chr18	158383	198383	ENST00000582707	+	ENSG00000101557	USP14	protein_coding	1475	chr18	228027	268027	ENST00000261600	-	ENSG00000079134	THOC1	protein_coding	1300
chr18	772547	812547	ENST00000584307	-	ENSG00000176105	YES1	protein_coding	1625	chr18	228027	268027	ENST00000261600	-	ENSG00000079134	THOC1	protein_coding	1300
chr18	2571510	2611510	ENST00000261597	+	ENSG00000080986	NDC80	protein_coding	1500	chr18	2655737	2695737	ENST00000320876	+	ENSG00000101596	SMCHD1	protein_coding	1450
chr18	2973313	3013313	ENST00000584294	-	ENSG00000101577	LPIN2	protein_coding	1550	chr18	2655737	2695737	ENST00000320876	+	ENSG00000101596	SMCHD1	protein_coding	1450
chr18	9334765	9374765	ENST00000262120	+	ENSG00000128791	TWSG1	protein_coding	1475	chr18	9475007	9515007	ENST00000019317	+	ENSG00000017797	RALBP1	protein_coding	1650
chr18	9708162	9748162	ENST00000578921	+	ENSG00000168461	RAB31	protein_coding	1500	chr18	9913999	9953999	ENST00000400000	+	ENSG00000101558	VAPA	protein_coding	1600
chr18	12337251	12377251	ENST00000269143	-	ENSG00000141385	AFG3L2	protein_coding	1425	chr18	12844337	12884337	ENST00000327283	-	ENSG00000175354	PTPN2	protein_coding	900
chr18	12844337	12884337	ENST00000327283	-	ENSG00000175354	PTPN2	protein_coding	900	chr18	12991361	13031361	ENST00000506447	+	ENSG00000101639	CEP192	protein_coding	1425
chr18	13686591	13726591	ENST00000402563	-	ENSG00000177150	FAM210A	protein_coding	1450	chr18	12991361	13031361	ENST00000506447	+	ENSG00000101639	CEP192	protein_coding	1425
chr18	18651812	18691812	ENST00000399799	-	ENSG00000067900	ROCK1	protein_coding	1650	chr18	19140845	19180845	ENST00000383276	-	ENSG00000141446	ESCO1	protein_coding	725
chr18	19140845	19180845	ENST00000383276	-	ENSG00000141446	ESCO1	protein_coding	725	chr18	19321281	19361281	ENST00000261537	+	ENSG00000101752	MIB1	protein_coding	1525
chr18	21126581	21166581	ENST00000269228	-	ENSG00000141458	NPC1	protein_coding	850	chr18	21594600	21634600	ENST00000317571	+	ENSG00000168234	TTC39C	protein_coding	1300
chr18	21594600	21634600	ENST00000317571	+	ENSG00000168234	TTC39C	protein_coding	1300	chr18	21937844	21977844	ENST00000578091	-	ENSG00000141447	OSBPL1A	protein_coding	1025
chr18	29078006	29118006	ENST00000261590	+	ENSG00000046604	DSG2	protein_coding	1625	chr18	29483099	29523099	ENST00000580104	-	ENSG00000153339	TRAPPC8	protein_coding	1200
chr18	32621324	32661324	ENST00000300249	+	ENSG00000166974	MAPRE2	protein_coding	1350	chr18	33037921	33077921	ENST00000283410	-	ENSG00000153391	INO80C	protein_coding	1100
chr18	33037921	33077921	ENST00000283410	-	ENSG00000153391	INO80C	protein_coding	1100	chr18	33161003	33201003	ENST00000537748	+	ENSG00000141429	GALNT1	protein_coding	1625
chr18	33607519	33647519	ENST00000357384	-	ENSG00000141425	RPRD1A	protein_coding	1525	chr18	33709834	33749834	ENST00000358232	+	ENSG00000134759	ELP2	protein_coding	1300
chr18	39535199	39575199	ENST00000262039	+	ENSG00000078142	PIK3C3	protein_coding	1475	chr18	43507305	43547305	ENST00000282041	-	ENSG00000152223	EPG5	protein_coding	1550
chr18	43507305	43547305	ENST00000282041	-	ENSG00000152223	EPG5	protein_coding	1550	chr18	43753988	43793988	ENST00000282059	+	ENSG00000152242	C18orf25	protein_coding	1750
chr18	44457468	44497468	ENST00000545673	-	ENSG00000078043	PIAS2	protein_coding	1150	chr18	43753988	43793988	ENST00000282059	+	ENSG00000152242	C18orf25	protein_coding	1750
chr18	45417515	45457515	ENST00000356825	-	ENSG00000175387	SMAD2	protein_coding	1600	chr18	46065417	46105417	ENST00000256413	+	ENSG00000134030	CTIF	protein_coding	1200
chr18	46947717	46987717	ENST00000583353	-	ENSG00000141627	DYM	protein_coding	1775	chr18	46065417	46105417	ENST00000256413	+	ENSG00000134030	CTIF	protein_coding	1200
chr18	48494410	48534410	ENST00000452201	+	ENSG00000141646	SMAD4	protein_coding	1100	chr18	48556583	48596583	ENST00000342988	+	ENSG00000141646	SMAD4	protein_coding	1175
chr18	55430327	55470327	ENST00000536015	-	ENSG00000081923	ATP8B1	protein_coding	1550	chr18	55888767	55928767	ENST00000431212	+	ENSG00000049759	NEDD4L	protein_coding	1250
chr18	55888767	55928767	ENST00000431212	+	ENSG00000049759	NEDD4L	protein_coding	1250	chr18	56338618	56378618	ENST00000348428	+	ENSG00000172175	MALT1	protein_coding	1300
chr18	56338618	56378618	ENST00000348428	+	ENSG00000172175	MALT1	protein_coding	1300	chr18	56529832	56569832	ENST00000336078	+	ENSG00000074657	ZNF532	protein_coding	1325
chr18	57324574	57364574	ENST00000439986	-	ENSG00000183287	CCBE1	protein_coding	1300	chr18	56529832	56569832	ENST00000336078	+	ENSG00000074657	ZNF532	protein_coding	1325
chr18	59520992	59560992	ENST00000312828	-	ENSG00000176641	RNF152	protein_coding	1375	chr18	59854507	59894507	ENST00000398130	+	ENSG00000134444	KIAA1468	protein_coding	1500
chr18	60190658	60230658	ENST00000269499	+	ENSG00000141664	ZCCHC2	protein_coding	500	chr18	60382672	60422672	ENST00000400316	+	ENSG00000081913	PHLPP1	protein_coding	1075
chr18	66342535	66382535	ENST00000299608	-	ENSG00000166479	TMX3	protein_coding	1325	chr18	67833181	67873181	ENST00000255674	-	ENSG00000176225	RTTN	protein_coding	1300
chr18	72265106	72305106	ENST00000582337	+	ENSG00000215421	ZNF407	protein_coding	1675	chr18	72922710	72962710	ENST00000322038	+	ENSG00000179981	TSHZ1	protein_coding	1450
chr18	74167146	74207146	ENST00000443185	-	ENSG00000101493	ZNF516	protein_coding	1450	chr18	74534563	74574563	ENST00000320610	+	ENSG00000130856	ZNF236	protein_coding	1775
chr18	76829397	76869397	ENST00000426216	+	ENSG00000166377	ATP9B	protein_coding	950	chr18	77439801	77479801	ENST00000299543	+	ENSG00000060069	CTDP1	protein_coding	700
chr18	77439801	77479801	ENST00000299543	+	ENSG00000060069	CTDP1	protein_coding	700	chr18	77671664	77711664	ENST00000397778	-	ENSG00000122490	PQLC1	protein_coding	850
chr18	77671664	77711664	ENST00000397778	-	ENSG00000122490	PQLC1	protein_coding	850	chr18	77794346	77834346	ENST00000569722	+	ENSG00000261126	RP11-795F19.1	lincRNA	925
chr19	926037	966037	ENST00000263620	+	ENSG00000116017	ARID3A	protein_coding	1550	chr19	1612326	1652326	ENST00000344749	-	ENSG00000071564	TCF3	protein_coding	600
chr19	1612326	1652326	ENST00000344749	-	ENSG00000071564	TCF3	protein_coding	600	chr19	1941161	1981161	ENST00000255641	+	ENSG00000133275	CSNK1G2	protein_coding	1050
chr19	1941161	1981161	ENST00000255641	+	ENSG00000133275	CSNK1G2	protein_coding	1050	chr19	2111556	2151556	ENST00000345016	-	ENSG00000065000	AP3D1	protein_coding	800
chr19	2111556	2151556	ENST00000345016	-	ENSG00000065000	AP3D1	protein_coding	800	chr19	2164148	2204148	ENST00000398665	+	ENSG00000104885	DOT1L	protein_coding	1075
chr19	3359616	3399616	ENST00000346156	+	ENSG00000141905	NFIC	protein_coding	1575	chr19	3660463	3700463	ENST00000539785	-	ENSG00000186111	PIP5K1C	protein_coding	1075
chr19	4360496	4400496	ENST00000269886	-	ENSG00000141985	SH3GL1	protein_coding	1125	chr19	4402660	4442660	ENST00000301280	+	ENSG00000167670	CHAF1A	protein_coding	1300
chr19	4683855	4723855	ENST00000262960	-	ENSG00000142002	DPP9	protein_coding	725	chr19	4909510	4949510	ENST00000396708	+	ENSG00000034063	UHRF1	protein_coding	1025
chr19	5623150	5663150	ENST00000454510	+	ENSG00000160633	SAFB	protein_coding	1350	chr19	5938320	5978320	ENST00000340578	-	ENSG00000031823	RANBP3	protein_coding	1300
chr19	5938320	5978320	ENST00000340578	-	ENSG00000031823	RANBP3	protein_coding	1300	chr19	6070664	6110664	ENST00000303657	-	ENSG00000087903	RFX2	protein_coding	1275
chr19	6239959	6279959	ENST00000252674	-	ENSG00000130382	MLLT1	protein_coding	1250	chr19	6070664	6110664	ENST00000303657	-	ENSG00000087903	RFX2	protein_coding	1275
chr19	7460098	7500098	ENST00000319670	+	ENSG00000104880	ARHGEF18	protein_coding	1350	chr19	8030529	8070529	ENST00000407627	-	ENSG00000066044	ELAVL1	protein_coding	1450
chr19	8030529	8070529	ENST00000407627	-	ENSG00000066044	ELAVL1	protein_coding	1450	chr19	8509651	8549651	ENST00000325495	+	ENSG00000099783	HNRNPM	protein_coding	1625
chr19	9435021	9475021	ENST00000541595	+	ENSG00000188629	ZNF177	protein_coding	1450	chr19	10265755	10305755	ENST00000359526	-	ENSG00000130816	DNMT1	protein_coding	1075
chr19	10265755	10305755	ENST00000359526	-	ENSG00000130816	DNMT1	protein_coding	1075	chr19	10713121	10753121	ENST00000407327	+	ENSG00000129353	SLC44A2	protein_coding	650
chr19	10713121	10753121	ENST00000407327	+	ENSG00000129353	SLC44A2	protein_coding	650	chr19	10828729	10868729	ENST00000408974	+	ENSG00000079805	DNM2	protein_coding	1300
chr19	10982253	11022253	ENST00000327064	+	ENSG00000142453	CARM1	protein_coding	1325	chr19	10828729	10868729	ENST00000408974	+	ENSG00000079805	DNM2	protein_coding	1300
chr19	12098494	12138494	ENST00000476474	+	ENSG00000219665	CTD-2006C1.2	protein_coding	1200	chr19	12365649	12405649	ENST00000397742	-	ENSG00000197857	ZNF44	protein_coding	1375
chr19	12365649	12405649	ENST00000397742	-	ENSG00000197857	ZNF44	protein_coding	1375	chr19	12622288	12662288	ENST00000428311	-	ENSG00000196826	CTD-2192J16.17	protein_coding	775
chr19	13577317	13617317	ENST00000573710	-	ENSG00000141837	CACNA1A	protein_coding	1400	chr19	14077134	14117134	ENST00000254325	-	ENSG00000132005	RFX1	protein_coding	1150
chr19	14800881	14840881	ENST00000540689	+	ENSG00000160961	ZNF333	protein_coding	950	chr19	15403356	15443356	ENST00000360016	-	ENSG00000141867	BRD4	protein_coding	1650
chr19	16542781	16582781	ENST00000455140	-	ENSG00000127527	EPS15L1	protein_coding	1250	chr19	16940218	16980218	ENST00000379803	+	ENSG00000127511	SIN3B	protein_coding	675
chr19	18592937	18632937	ENST00000262809	-	ENSG00000105656	ELL	protein_coding	1500	chr19	18794425	18834425	ENST00000338797	+	ENSG00000105662	CRTC1	protein_coding	875
chr19	19104380	19144380	ENST00000337018	-	ENSG00000064607	SUGP2	protein_coding	925	chr19	19262937	19302937	ENST00000354191	-	ENSG00000064489	MEF2BNB-MEF2B	protein_coding	375
chr19	19262937	19302937	ENST00000354191	-	ENSG00000064489	MEF2BNB-MEF2B	protein_coding	375	chr19	19391318	19431318	ENST00000247001	-	ENSG00000105705	SUGP1	protein_coding	625
chr19	21324840	21364840	ENST00000311048	+	ENSG00000196705	ZNF431	protein_coding	1175	chr19	21910330	21950330	ENST00000358296	-	ENSG00000197020	ZNF100	protein_coding	900
chr19	24216276	24256276	ENST00000342944	+	ENSG00000213096	ZNF254	protein_coding	750	chr19	21910330	21950330	ENST00000358296	-	ENSG00000197020	ZNF100	protein_coding	900
chr19	30433158	30473158	ENST00000392271	+	ENSG00000105176	URI1	protein_coding	1425	chr19	31800453	31840453	ENST00000240587	-	ENSG00000121297	TSHZ3	protein_coding	1375
chr19	31800453	31840453	ENST00000240587	-	ENSG00000121297	TSHZ3	protein_coding	1375	chr19	32836514	32876514	ENST00000355898	+	ENSG00000168813	ZNF507	protein_coding	1075
chr19	32836514	32876514	ENST00000355898	+	ENSG00000168813	ZNF507	protein_coding	1075	chr19	32896655	32936655	ENST00000392250	+	ENSG00000178904	DPY19L3	protein_coding	1150
chr19	33126102	33166102	ENST00000306065	-	ENSG00000105186	ANKRD27	protein_coding	925	chr19	32896655	32936655	ENST00000392250	+	ENSG00000178904	DPY19L3	protein_coding	1150
chr19	33972799	34012799	ENST00000397032	-	ENSG00000124299	PEPD	protein_coding	1200	chr19	34663352	34703352	ENST00000433627	+	ENSG00000257103	LSM14A	protein_coding	1450
chr19	34663352	34703352	ENST00000433627	+	ENSG00000257103	LSM14A	protein_coding	1450	chr19	34919268	34959268	ENST00000246548	+	ENSG00000126261	UBA2	protein_coding	1275
chr19	36545783	36585783	ENST00000401500	+	ENSG00000075702	WDR62	protein_coding	825	chr19	37808813	37848813	ENST00000544914	+	ENSG00000181666	HKR1	protein_coding	2450
chr19	37808813	37848813	ENST00000544914	+	ENSG00000181666	HKR1	protein_coding	2450	chr19	38397861	38437861	ENST00000222345	+	ENSG00000105738	SIPA1L3	protein_coding	1100
chr19	39138310	39178310	ENST00000252699	+	ENSG00000130402	ACTN4	protein_coding	1400	chr19	39616420	39656420	ENST00000321944	+	ENSG00000130669	PAK4	protein_coding	1200
chr19	39616420	39656420	ENST00000321944	+	ENSG00000130669	PAK4	protein_coding	1200	chr19	39833108	39873108	ENST00000314471	+	ENSG00000179134	SAMD4B	protein_coding	1375
chr19	41725108	41765108	ENST00000301178	+	ENSG00000167601	AXL	protein_coding	900	chr19	42596630	42636630	ENST00000389341	-	ENSG00000028277	POU2F2	protein_coding	1275
chr19	45349393	45389393	ENST00000252483	+	ENSG00000130202	PVRL2	protein_coding	1525	chr19	45754842	45794842	ENST00000300843	+	ENSG00000007047	MARK4	protein_coding	1100
chr19	46326548	46366548	ENST00000245934	-	ENSG00000125755	SYMPK	protein_coding	1000	chr19	46850251	46890251	ENST00000012443	+	ENSG00000011485	PPP5C	protein_coding	1275
chr19	47577009	47617009	ENST00000253048	-	ENSG00000130749	ZC3H4	protein_coding	850	chr19	47634080	47674080	ENST00000270225	+	ENSG00000142230	SAE1	protein_coding	1375
chr19	48111453	48151453	ENST00000396720	+	ENSG00000063169	GLTSCR1	protein_coding	1325	chr19	47634080	47674080	ENST00000270225	+	ENSG00000142230	SAE1	protein_coding	1375
chr19	49661052	49701052	ENST00000252826	+	ENSG00000130529	TRPM4	protein_coding	500	chr19	50270180	50310180	ENST00000354293	+	ENSG00000196961	AP2A1	protein_coding	1050
chr19	50270180	50310180	ENST00000354293	+	ENSG00000196961	AP2A1	protein_coding	1050	chr19	50488805	50528805	ENST00000377011	-	ENSG00000105053	VRK3	protein_coding	950
chr19	53153741	53193741	ENST00000434535	-	ENSG00000167766	ZNF83	protein_coding	1125	chr19	50488805	50528805	ENST00000377011	-	ENSG00000105053	VRK3	protein_coding	950
chr19	56786294	56826294	ENST00000254165	-	ENSG00000131848	ZSCAN5A	protein_coding	775	chr19	53153741	53193741	ENST00000434535	-	ENSG00000167766	ZNF83	protein_coding	1125
chr2	1708624	1748624	ENST00000485177	-	ENSG00000130508	PXDN	protein_coding	1325	chr2	3383446	3423446	ENST00000382110	+	ENSG00000171853	TRAPPC12	protein_coding	1175
chr2	8937760	8977760	ENST00000473731	-	ENSG00000134313	KIDINS220	protein_coding	1075	chr2	9103942	9143942	ENST00000305997	-	ENSG00000143797	MBOAT2	protein_coding	1500
chr2	9346894	9386894	ENST00000281419	+	ENSG00000151693	ASAP2	protein_coding	950	chr2	9103942	9143942	ENST00000305997	-	ENSG00000143797	MBOAT2	protein_coding	1500
chr2	9655917	9695917	ENST00000310823	-	ENSG00000151694	ADAM17	protein_coding	1625	chr2	9731143	9771143	ENST00000238081	-	ENSG00000134308	YWHAQ	protein_coding	1725
chr2	9983483	10023483	ENST00000263663	+	ENSG00000115750	TAF1B	protein_coding	1050	chr2	9731143	9771143	ENST00000238081	-	ENSG00000134308	YWHAQ	protein_coding	1725
chr2	10443015	10483015	ENST00000423674	+	ENSG00000115756	HPCAL1	protein_coding	1425	chr2	9983483	10023483	ENST00000263663	+	ENSG00000115750	TAF1B	protein_coding	1050
chr2	11886714	11926714	ENST00000256720	+	ENSG00000134324	LPIN1	protein_coding	1250	chr2	10443015	10483015	ENST00000423674	+	ENSG00000115756	HPCAL1	protein_coding	1425
chr2	15661454	15701454	ENST00000441750	-	ENSG00000151779	NBAS	protein_coding	1275	chr2	17895097	17935097	ENST00000351948	-	ENSG00000163029	SMC6	protein_coding	1225
chr2	17895097	17935097	ENST00000351948	-	ENSG00000163029	SMC6	protein_coding	1225	chr2	18059114	18099114	ENST00000403915	+	ENSG00000170745	KCNS3	protein_coding	925
chr2	20810842	20850842	ENST00000446825	-	ENSG00000118960	HS1BP3	protein_coding	825	chr2	20982882	21022882	ENST00000412261	-	ENSG00000118961	C2orf43	protein_coding	1225
chr2	24109984	24149984	ENST00000238789	-	ENSG00000119778	ATAD2B	protein_coding	1225	chr2	24299752	24339752	ENST00000468799	+	ENSG00000219626	AC008073.6	protein_coding	525
chr2	24543583	24583583	ENST00000355123	-	ENSG00000198399	ITSN2	protein_coding	1225	chr2	24714783	24754783	ENST00000496333	+	ENSG00000084676	NCOA1	protein_coding	875
chr2	25102708	25142708	ENST00000260600	-	ENSG00000138031	ADCY3	protein_coding	1025	chr2	24714783	24754783	ENST00000496333	+	ENSG00000084676	NCOA1	protein_coding	875
chr2	26061385	26101385	ENST00000435504	-	ENSG00000143970	ASXL2	protein_coding	750	chr2	26256976	26296976	ENST00000495146	+	ENSG00000084733	RAB10	protein_coding	1675
chr2	26256976	26296976	ENST00000495146	+	ENSG00000084733	RAB10	protein_coding	1675	chr2	26427594	26467594	ENST00000380649	-	ENSG00000084754	HADHA	protein_coding	1275
chr2	26427594	26467594	ENST00000380649	-	ENSG00000084754	HADHA	protein_coding	1275	chr2	26467763	26507763	ENST00000317799	+	ENSG00000138029	HADHB	protein_coding	1225
chr2	26568982	26608982	ENST00000260585	+	ENSG00000138018	EPT1	protein_coding	1450	chr2	26467763	26507763	ENST00000317799	+	ENSG00000138029	HADHB	protein_coding	1225
chr2	27193480	27233480	ENST00000233121	+	ENSG00000084764	MAPRE3	protein_coding	1450	chr2	27805897	27845897	ENST00000379717	+	ENSG00000243943	ZNF512	protein_coding	1525
chr2	27805897	27845897	ENST00000379717	+	ENSG00000243943	ZNF512	protein_coding	1525	chr2	27994606	28034606	ENST00000448427	+	ENSG00000243147	MRPL33	protein_coding	1100
chr2	28974614	29014614	ENST00000358506	+	ENSG00000213639	PPP1CB	protein_coding	1750	chr2	29336862	29376862	ENST00000402240	+	ENSG00000115295	CLIP4	protein_coding	1950
chr2	30454403	30494403	ENST00000404397	+	ENSG00000213626	LBH	protein_coding	1275	chr2	30670092	30710092	ENST00000466477	+	ENSG00000172954	LCLAT1	protein_coding	1350
chr2	33701295	33741295	ENST00000403687	+	ENSG00000152689	RASGRP3	protein_coding	1200	chr2	36583069	36623069	ENST00000280527	+	ENSG00000150938	CRIM1	protein_coding	1750
chr2	36583069	36623069	ENST00000280527	+	ENSG00000150938	CRIM1	protein_coding	1750	chr2	36785334	36825334	ENST00000379245	-	ENSG00000171055	FEZ2	protein_coding	1600
chr2	37153615	37193615	ENST00000263918	-	ENSG00000115808	STRN	protein_coding	1725	chr2	37344190	37384190	ENST00000233057	-	ENSG00000055332	EIF2AK2	protein_coding	1175
chr2	38790171	38830171	ENST00000409636	-	ENSG00000143889	HNRPLL	protein_coding	1650	chr2	39063066	39103066	ENST00000460193	-	ENSG00000163214	DHX57	protein_coding	975
chr2	39624453	39664453	ENST00000263881	-	ENSG00000011566	MAP4K3	protein_coding	1675	chr2	39966407	40006407	ENST00000378727	-	ENSG00000138050	THUMPD2	protein_coding	1625
chr2	39663778	39703778	ENST00000426083	+	ENSG00000231312	AC007246.3	processed_transcript	1150	chr2	39966407	40006407	ENST00000378727	-	ENSG00000138050	THUMPD2	protein_coding	1625
chr2	40639209	40679209	ENST00000406785	-	ENSG00000183023	SLC8A1	protein_coding	825	chr2	39966407	40006407	ENST00000378727	-	ENSG00000138050	THUMPD2	protein_coding	1625
chr2	42396490	42436490	ENST00000318522	+	ENSG00000143924	EML4	protein_coding	1400	chr2	43783185	43823185	ENST00000405975	-	ENSG00000115970	THADA	protein_coding	950
chr2	43783185	43823185	ENST00000405975	-	ENSG00000115970	THADA	protein_coding	950	chr2	44183144	44223144	ENST00000260665	-	ENSG00000138095	LRPPRC	protein_coding	1375
chr2	44183144	44223144	ENST00000260665	-	ENSG00000138095	LRPPRC	protein_coding	1375	chr2	44549001	44589001	ENST00000541738	-	ENSG00000138078	PREPL	protein_coding	1125
chr2	45878484	45918484	ENST00000421201	+	ENSG00000171132	PRKCE	protein_coding	1275	chr2	46769867	46809867	ENST00000238738	+	ENSG00000119729	RHOQ	protein_coding	1025
chr2	46769867	46809867	ENST00000238738	+	ENSG00000119729	RHOQ	protein_coding	1025	chr2	46926091	46966091	ENST00000306503	+	ENSG00000171150	SOCS5	protein_coding	1300
chr2	47168313	47208313	ENST00000319190	+	ENSG00000068724	TTC7A	protein_coding	1200	chr2	46926091	46966091	ENST00000306503	+	ENSG00000171150	SOCS5	protein_coding	1300
chr2	48541776	48581776	ENST00000413569	+	ENSG00000170802	FOXN2	protein_coding	1650	chr2	47168313	47208313	ENST00000319190	+	ENSG00000068724	TTC7A	protein_coding	1200
chr2	53974146	54014146	ENST00000394717	-	ENSG00000115239	ASB3	protein_coding	1275	chr2	54683422	54723422	ENST00000356805	+	ENSG00000115306	SPTBN1	protein_coding	1500
chr2	54683422	54723422	ENST00000356805	+	ENSG00000115306	SPTBN1	protein_coding	1500	chr2	55237964	55277964	ENST00000404909	-	ENSG00000115310	RTN4	protein_coding	1425
chr2	55237964	55277964	ENST00000404909	-	ENSG00000115310	RTN4	protein_coding	1425	chr2	55607057	55647057	ENST00000436346	-	ENSG00000115355	CCDC88A	protein_coding	1125
chr2	55607057	55647057	ENST00000436346	-	ENSG00000115355	CCDC88A	protein_coding	1125	chr2	55804758	55844758	ENST00000407823	-	ENSG00000138041	SMEK2	protein_coding	1075
chr2	55804758	55844758	ENST00000407823	-	ENSG00000138041	SMEK2	protein_coding	1075	chr2	55881045	55921045	ENST00000447944	-	ENSG00000138035	PNPT1	protein_coding	1150
chr2	56411258	56451258	ENST00000407595	+	ENSG00000055813	CCDC85A	protein_coding	1525	chr2	55881045	55921045	ENST00000447944	-	ENSG00000138035	PNPT1	protein_coding	1150
chr2	58273729	58313729	ENST00000412104	+	ENSG00000028116	VRK2	protein_coding	1375	chr2	58428507	58468507	ENST00000449070	-	ENSG00000115392	FANCL	protein_coding	1550
chr2	60983365	61023365	ENST00000238714	+	ENSG00000115421	PAPOLG	protein_coding	725	chr2	61108656	61148656	ENST00000295025	+	ENSG00000162924	REL	protein_coding	1650
chr2	62132782	62172782	ENST00000311832	+	ENSG00000173163	COMMD1	protein_coding	1325	chr2	61108656	61148656	ENST00000295025	+	ENSG00000162924	REL	protein_coding	1650
chr2	64068074	64108074	ENST00000394417	+	ENSG00000169764	UGP2	protein_coding	1600	chr2	64206567	64246567	ENST00000483277	-	ENSG00000143952	VPS54	protein_coding	1700
chr2	64206567	64246567	ENST00000483277	-	ENSG00000143952	VPS54	protein_coding	1700	chr2	64331588	64371588	ENST00000358912	-	ENSG00000197329	PELI1	protein_coding	1800
chr2	65317240	65357240	ENST00000409784	-	ENSG00000138069	RAB1A	protein_coding	1750	chr2	65454887	65494887	ENST00000260641	+	ENSG00000138071	ACTR2	protein_coding	1675
chr2	65619771	65659771	ENST00000440972	-	ENSG00000198369	SPRED2	protein_coding	1500	chr2	65454887	65494887	ENST00000260641	+	ENSG00000138071	ACTR2	protein_coding	1675
chr2	69240310	69280310	ENST00000303714	+	ENSG00000169604	ANTXR1	protein_coding	1525	chr2	69830849	69870849	ENST00000406297	-	ENSG00000115977	AAK1	protein_coding	1600
chr2	69830849	69870849	ENST00000406297	-	ENSG00000115977	AAK1	protein_coding	1600	chr2	69969106	70009106	ENST00000394295	+	ENSG00000196975	ANXA4	protein_coding	1525
chr2	70275686	70315686	ENST00000452431	-	ENSG00000179818	PCBP1-AS1	processed_transcript	975	chr2	69969106	70009106	ENST00000394295	+	ENSG00000196975	ANXA4	protein_coding	1525
chr2	71558889	71598889	ENST00000355812	+	ENSG00000075292	ZNF638	protein_coding	1125	chr2	70275686	70315686	ENST00000452431	-	ENSG00000179818	PCBP1-AS1	processed_transcript	975
chr2	73013170	73053170	ENST00000272427	-	ENSG00000144036	EXOC6B	protein_coding	1325	chr2	73612886	73652886	ENST00000409009	+	ENSG00000116127	ALMS1	protein_coding	1100
chr2	75873920	75913920	ENST00000358788	+	ENSG00000115364	MRPL19	protein_coding	1650	chr2	73612886	73652886	ENST00000409009	+	ENSG00000116127	ALMS1	protein_coding	1100
chr2	85198216	85238216	ENST00000409785	+	ENSG00000176407	KCMF1	protein_coding	2050	chr2	85360533	85400533	ENST00000282111	+	ENSG00000152284	TCF7L1	protein_coding	1100
chr2	86293278	86333278	ENST00000263857	-	ENSG00000068654	POLR1A	protein_coding	1300	chr2	86382893	86422893	ENST00000410111	-	ENSG00000132305	IMMT	protein_coding	1350
chr2	86667924	86707924	ENST00000409556	+	ENSG00000115548	KDM3A	protein_coding	1425	chr2	86750602	86790602	ENST00000409225	-	ENSG00000115561	CHMP3	protein_coding	1250
chr2	86750602	86790602	ENST00000409225	-	ENSG00000115561	CHMP3	protein_coding	1250	chr2	86810151	86850151	ENST00000440757	-	ENSG00000249884	RNF103-CHMP3	protein_coding	1100
chr2	88887094	88927094	ENST00000303236	-	ENSG00000172071	EIF2AK3	protein_coding	1375	chr2	86810151	86850151	ENST00000440757	-	ENSG00000249884	RNF103-CHMP3	protein_coding	1100
chr2	97264115	97304115	ENST00000441706	-	ENSG00000114982	KANSL3	protein_coding	1300	chr2	98572388	98612388	ENST00000425805	-	ENSG00000075568	TMEM131	protein_coding	1500
chr2	98572388	98612388	ENST00000425805	-	ENSG00000075568	TMEM131	protein_coding	1500	chr2	99061317	99101317	ENST00000409016	+	ENSG00000040933	INPP4A	protein_coding	1250
chr2	99953816	99993816	ENST00000289371	+	ENSG00000158417	EIF5B	protein_coding	1350	chr2	100066497	100106497	ENST00000258428	-	ENSG00000135945	REV1	protein_coding	1625
chr2	101436614	101476614	ENST00000335681	+	ENSG00000170485	NPAS2	protein_coding	1175	chr2	101727846	101767846	ENST00000409318	-	ENSG00000204634	TBC1D8	protein_coding	1125
chr2	102051165	102091165	ENST00000481179	-	ENSG00000196460	RFX8	protein_coding	875	chr2	102313312	102353312	ENST00000427603	+	ENSG00000071054	MAP4K4	protein_coding	1500
chr2	105654441	105694441	ENST00000258455	+	ENSG00000135972	MRPS9	protein_coding	1000	chr2	105976124	106016124	ENST00000409177	-	ENSG00000115641	FHL2	protein_coding	1325
chr2	106361354	106401354	ENST00000233154	+	ENSG00000071051	NCK2	protein_coding	1350	chr2	105976124	106016124	ENST00000409177	-	ENSG00000115641	FHL2	protein_coding	1325
chr2	106770795	106810795	ENST00000283148	-	ENSG00000115652	UXS1	protein_coding	1075	chr2	106361354	106401354	ENST00000233154	+	ENSG00000071051	NCK2	protein_coding	1350
chr2	109065684	109105684	ENST00000309863	+	ENSG00000135968	GCC2	protein_coding	950	chr2	109150857	109190857	ENST00000544547	+	ENSG00000169756	LIMS1	protein_coding	1475
chr2	109745804	109785804	ENST00000418513	+	ENSG00000172985	SH3RF3	protein_coding	1075	chr2	110331783	110371783	ENST00000397712	-	ENSG00000186522	SEPT10	protein_coding	1475
chr2	111395691	111435691	ENST00000302759	-	ENSG00000169679	BUB1	protein_coding	1200	chr2	110331783	110371783	ENST00000397712	-	ENSG00000186522	SEPT10	protein_coding	1475
chr2	112812800	112852800	ENST00000283206	+	ENSG00000153214	TMEM87B	protein_coding	1175	chr2	113239731	113279731	ENST00000233336	+	ENSG00000114999	TTL	protein_coding	1300
chr2	114474400	114514400	ENST00000245680	-	ENSG00000115084	SLC35F5	protein_coding	1450	chr2	114647537	114687537	ENST00000263238	+	ENSG00000115091	ACTR3	protein_coding	1275
chr2	118731709	118771709	ENST00000319432	-	ENSG00000125633	CCDC93	protein_coding	1250	chr2	121493199	121533199	ENST00000472722	+	ENSG00000074047	GLI2	protein_coding	1400
chr2	121493199	121533199	ENST00000472722	+	ENSG00000074047	GLI2	protein_coding	1400	chr2	122367163	122407163	ENST00000409078	-	ENSG00000074054	CLASP1	protein_coding	1550
chr2	127413509	127453509	ENST00000259254	+	ENSG00000136732	GYPC	protein_coding	1375	chr2	128106041	128146041	ENST00000409947	-	ENSG00000169967	MAP3K2	protein_coding	1175
chr2	128106041	128146041	ENST00000409947	-	ENSG00000169967	MAP3K2	protein_coding	1175	chr2	128244044	128284044	ENST00000295321	-	ENSG00000163166	IWS1	protein_coding	1275
chr2	128528761	128568761	ENST00000436787	-	ENSG00000136709	WDR33	protein_coding	1475	chr2	128745694	128785694	ENST00000259234	-	ENSG00000136715	SAP130	protein_coding	1500
chr2	128745694	128785694	ENST00000259234	-	ENSG00000136715	SAP130	protein_coding	1500	chr2	128848782	128888782	ENST00000375990	+	ENSG00000136731	UGGT1	protein_coding	1325
chr2	129036151	129076151	ENST00000259241	-	ENSG00000136720	HS6ST1	protein_coding	950	chr2	128848782	128888782	ENST00000375990	+	ENSG00000136731	UGGT1	protein_coding	1325
chr2	131811033	131851033	ENST00000389915	-	ENSG00000152102	FAM168B	protein_coding	1500	chr2	131862420	131902420	ENST00000409158	+	ENSG00000115762	PLEKHB2	protein_coding	1375
chr2	134877554	134917554	ENST00000468758	+	ENSG00000152127	MGAT5	protein_coding	1425	chr2	135676395	135716395	ENST00000264157	+	ENSG00000082258	CCNT2	protein_coding	1650
chr2	135676395	135716395	ENST00000264157	+	ENSG00000082258	CCNT2	protein_coding	1650	chr2	135809835	135849835	ENST00000264158	+	ENSG00000115839	RAB3GAP1	protein_coding	1325
chr2	136289025	136329025	ENST00000483021	+	ENSG00000048991	R3HDM1	protein_coding	1425	chr2	136499189	136539189	ENST00000272638	+	ENSG00000144224	UBXN4	protein_coding	1125
chr2	136499189	136539189	ENST00000272638	+	ENSG00000144224	UBXN4	protein_coding	1125	chr2	136703670	136743670	ENST00000456565	-	ENSG00000115866	DARS	protein_coding	1000
chr2	139259371	139299371	ENST00000280098	+	ENSG00000144228	SPOPL	protein_coding	1500	chr2	136703670	136743670	ENST00000456565	-	ENSG00000115866	DARS	protein_coding	1000
chr2	145050135	145090135	ENST00000429978	-	ENSG00000121964	GTDC1	protein_coding	1300	chr2	148602086	148642086	ENST00000487959	+	ENSG00000121989	ACVR2A	protein_coding	1600
chr2	148602086	148642086	ENST00000487959	+	ENSG00000121989	ACVR2A	protein_coding	1600	chr2	148739147	148779147	ENST00000264169	-	ENSG00000115947	ORC4	protein_coding	1425
chr2	148778580	148818580	ENST00000407073	+	ENSG00000204406	MBD5	protein_coding	1075	chr2	148602086	148642086	ENST00000487959	+	ENSG00000121989	ACVR2A	protein_coding	1600
chr2	149402009	149442009	ENST00000457184	+	ENSG00000135999	EPC2	protein_coding	1600	chr2	148778580	148818580	ENST00000407073	+	ENSG00000204406	MBD5	protein_coding	1075
chr2	152266397	152306397	ENST00000444746	+	ENSG00000080345	RIF1	protein_coding	1525	chr2	152992506	153032506	ENST00000263904	-	ENSG00000115145	STAM2	protein_coding	1125
chr2	152992506	153032506	ENST00000263904	-	ENSG00000115145	STAM2	protein_coding	1125	chr2	153191751	153231751	ENST00000288670	+	ENSG00000157827	FMNL2	protein_coding	1525
chr2	157291802	157331802	ENST00000415049	+	ENSG00000115159	GPD2	protein_coding	1550	chr2	158114110	158154110	ENST00000259056	+	ENSG00000136542	GALNT5	protein_coding	1500
chr2	158114110	158154110	ENST00000259056	+	ENSG00000136542	GALNT5	protein_coding	1500	chr2	158692374	158732374	ENST00000434821	-	ENSG00000115170	ACVR1	protein_coding	1150
chr2	159313476	159353476	ENST00000426248	+	ENSG00000144283	PKP4	protein_coding	1050	chr2	159825146	159865146	ENST00000454300	+	ENSG00000115183	TANC1	protein_coding	1475
chr2	160433203	160473203	ENST00000392783	-	ENSG00000123636	BAZ2B	protein_coding	1125	chr2	160879121	160919121	ENST00000392771	-	ENSG00000153246	PLA2R1	protein_coding	800
chr2	160879121	160919121	ENST00000392771	-	ENSG00000153246	PLA2R1	protein_coding	800	chr2	161310305	161350305	ENST00000348849	-	ENSG00000153250	RBMS1	protein_coding	1600
chr2	162016808	162056808	ENST00000392749	+	ENSG00000136560	TANK	protein_coding	1175	chr2	162164549	162204549	ENST00000409682	+	ENSG00000115233	PSMD14	protein_coding	1800
chr2	162891052	162931052	ENST00000360534	-	ENSG00000197635	DPP4	protein_coding	1525	chr2	163060045	163100045	ENST00000188790	-	ENSG00000078098	FAP	protein_coding	1325
chr2	164552522	164592522	ENST00000409634	-	ENSG00000182263	FIGN	protein_coding	1275	chr2	165772035	165812035	ENST00000303735	-	ENSG00000169507	SLC38A11	protein_coding	1100
chr2	165772035	165812035	ENST00000303735	-	ENSG00000169507	SLC38A11	protein_coding	1100	chr2	166770353	166810353	ENST00000243344	-	ENSG00000123607	TTC21B	protein_coding	1150
chr2	166770353	166810353	ENST00000243344	-	ENSG00000123607	TTC21B	protein_coding	1150	chr2	167192503	167232503	ENST00000409672	-	ENSG00000169432	SCN9A	protein_coding	1550
chr2	169064651	169104651	ENST00000355999	-	ENSG00000198648	STK39	protein_coding	1050	chr2	169312372	169352372	ENST00000305747	+	ENSG00000172292	CERS6	protein_coding	1700
chr2	170440850	170480850	ENST00000260970	+	ENSG00000138398	PPIG	protein_coding	1400	chr2	170683968	170723968	ENST00000272793	+	ENSG00000144357	UBR3	protein_coding	1325
chr2	171977410	172017410	ENST00000409443	-	ENSG00000198586	TLK1	protein_coding	1525	chr2	172251312	172291312	ENST00000462821	-	ENSG00000123600	METTL8	protein_coding	1575
chr2	172290727	172330727	ENST00000468592	+	ENSG00000115827	DCAF17	protein_coding	1100	chr2	171977410	172017410	ENST00000409443	-	ENSG00000198586	TLK1	protein_coding	1525
chr2	172778958	172818958	ENST00000392584	+	ENSG00000128708	HAT1	protein_coding	1625	chr2	172290727	172330727	ENST00000468592	+	ENSG00000115827	DCAF17	protein_coding	1100
chr2	173292082	173332082	ENST00000412899	+	ENSG00000091409	ITGA6	protein_coding	1275	chr2	173420101	173460101	ENST00000543905	+	ENSG00000152256	PDK1	protein_coding	1275
chr2	173940163	173980163	ENST00000539448	+	ENSG00000091436	AC013461.1	protein_coding	1775	chr2	173420101	173460101	ENST00000543905	+	ENSG00000152256	PDK1	protein_coding	1275
chr2	175073426	175113426	ENST00000284719	-	ENSG00000138430	OLA1	protein_coding	1500	chr2	175507627	175547627	ENST00000272746	-	ENSG00000115935	WIPF1	protein_coding	1075
chr2	175507627	175547627	ENST00000272746	-	ENSG00000115935	WIPF1	protein_coding	1075	chr2	175672293	175712293	ENST00000444394	-	ENSG00000128656	CHN1	protein_coding	1450
chr2	176827514	176867514	ENST00000535310	-	ENSG00000144320	KIAA1715	protein_coding	1500	chr2	177134123	177174123	ENST00000420864	+	ENSG00000128654	MTX2	protein_coding	1200
chr2	178257372	178297372	ENST00000264167	+	ENSG00000018510	AGPS	protein_coding	1600	chr2	179059208	179099208	ENST00000392505	+	ENSG00000079156	OSBPL6	protein_coding	1200
chr2	180089517	180129517	ENST00000428443	-	ENSG00000187231	SESTD1	protein_coding	1450	chr2	180831840	180871840	ENST00000404136	-	ENSG00000163510	CWC22	protein_coding	1500
chr2	181845112	181885112	ENST00000392415	+	ENSG00000170035	UBE2E3	protein_coding	1475	chr2	182321952	182361952	ENST00000397033	+	ENSG00000115232	ITGA4	protein_coding	1225
chr2	183580999	183620999	ENST00000264065	+	ENSG00000077232	DNAJC10	protein_coding	1275	chr2	183863586	183903586	ENST00000360982	-	ENSG00000061676	NCKAP1	protein_coding	1525
chr2	187454792	187494792	ENST00000261023	+	ENSG00000138448	ITGAV	protein_coding	1350	chr2	188379219	188419219	ENST00000233156	-	ENSG00000003436	TFPI	protein_coding	1500
chr2	188379219	188419219	ENST00000233156	-	ENSG00000003436	TFPI	protein_coding	1500	chr2	189156396	189196396	ENST00000409843	+	ENSG00000144366	GULP1	protein_coding	1550
chr2	190004605	190044605	ENST00000374866	-	ENSG00000204262	COL5A2	protein_coding	1725	chr2	189156396	189196396	ENST00000409843	+	ENSG00000144366	GULP1	protein_coding	1550
chr2	191144771	191184771	ENST00000359678	-	ENSG00000198130	HIBCH	protein_coding	1200	chr2	191273081	191313081	ENST00000392328	+	ENSG00000151690	MFSD6	protein_coding	1025
chr2	191513796	191553796	ENST00000409581	+	ENSG00000138386	NAB1	protein_coding	1425	chr2	191745553	191785553	ENST00000320717	+	ENSG00000115419	GLS	protein_coding	1725
chr2	191745553	191785553	ENST00000320717	+	ENSG00000115419	GLS	protein_coding	1725	chr2	191838976	191878976	ENST00000361099	-	ENSG00000115415	STAT1	protein_coding	1725
chr2	192109911	192149911	ENST00000418908	+	ENSG00000128641	MYO1B	protein_coding	1550	chr2	191838976	191878976	ENST00000361099	-	ENSG00000115415	STAT1	protein_coding	1725
chr2	197418416	197458416	ENST00000452031	-	ENSG00000138411	HECW2	protein_coding	1225	chr2	197504278	197544278	ENST00000431807	+	ENSG00000144395	CCDC150	protein_coding	1300
chr2	198259815	198299815	ENST00000335508	-	ENSG00000115524	SF3B1	protein_coding	1700	chr2	197504278	197544278	ENST00000431807	+	ENSG00000144395	CCDC150	protein_coding	1300
chr2	200283468	200323468	ENST00000443023	-	ENSG00000119042	SATB2	protein_coding	750	chr2	200776029	200816029	ENST00000491721	+	ENSG00000178074	C2orf69	protein_coding	1575
chr2	200776029	200816029	ENST00000491721	+	ENSG00000178074	C2orf69	protein_coding	1575	chr2	200820544	200860544	ENST00000435773	+	ENSG00000162972	C2orf47	protein_coding	1325
chr2	201170604	201210604	ENST00000439084	+	ENSG00000196141	SPATS2L	protein_coding	1400	chr2	201390880	201430880	ENST00000357799	+	ENSG00000163535	SGOL2	protein_coding	1325
chr2	201896394	201936394	ENST00000485636	-	ENSG00000155744	FAM126B	protein_coding	1500	chr2	201980827	202020827	ENST00000309955	+	ENSG00000003402	CFLAR	protein_coding	1375
chr2	202276302	202316302	ENST00000332624	-	ENSG00000115993	TRAK2	protein_coding	900	chr2	201980827	202020827	ENST00000309955	+	ENSG00000003402	CFLAR	protein_coding	1375
chr2	202605912	202645912	ENST00000264276	-	ENSG00000003393	ALS2	protein_coding	1325	chr2	202671098	202711098	ENST00000260967	+	ENSG00000138395	CDK15	protein_coding	1375
chr2	203241659	203281659	ENST00000374580	+	ENSG00000204217	BMPR2	protein_coding	1225	chr2	202671098	202711098	ENST00000260967	+	ENSG00000138395	CDK15	protein_coding	1375
chr2	203879602	203919602	ENST00000497505	+	ENSG00000144426	NBEAL1	protein_coding	1100	chr2	204360133	204400133	ENST00000319170	-	ENSG00000173166	RAPH1	protein_coding	1600
chr2	205410516	205450516	ENST00000415947	+	ENSG00000116117	PARD3B	protein_coding	1125	chr2	204360133	204400133	ENST00000319170	-	ENSG00000173166	RAPH1	protein_coding	1600
chr2	206547224	206587224	ENST00000540178	+	ENSG00000118257	NRP2	protein_coding	1150	chr2	206910906	206950906	ENST00000403263	-	ENSG00000114933	INO80D	protein_coding	875
chr2	207991991	208031991	ENST00000457962	-	ENSG00000118263	KLF7	protein_coding	1575	chr2	208576264	208616264	ENST00000392209	+	ENSG00000163249	CCNYL1	protein_coding	1025
chr2	208576264	208616264	ENST00000392209	+	ENSG00000163249	CCNYL1	protein_coding	1025	chr2	209130991	209170991	ENST00000443896	+	ENSG00000115020	PIKFYVE	protein_coding	1450
chr2	210996107	211036107	ENST00000281772	-	ENSG00000144445	KANSL1L	protein_coding	1000	chr2	211301499	211341499	ENST00000431941	-	ENSG00000115365	LANCL1	protein_coding	1025
chr2	214149113	214189113	ENST00000406979	+	ENSG00000144451	SPAG16	protein_coding	800	chr2	215634428	215674428	ENST00000260947	-	ENSG00000138376	BARD1	protein_coding	1825
chr2	215634428	215674428	ENST00000260947	-	ENSG00000138376	BARD1	protein_coding	1825	chr2	216260895	216300895	ENST00000354785	-	ENSG00000115414	FN1	protein_coding	1550
chr2	217196750	217236750	ENST00000273067	-	ENSG00000144583	2013-03-04	protein_coding	750	chr2	216260895	216300895	ENST00000354785	-	ENSG00000115414	FN1	protein_coding	1550
chr2	218768851	218808851	ENST00000171887	-	ENSG00000079308	TNS1	protein_coding	1325	chr2	218827718	218867718	ENST00000446903	-	ENSG00000079308	TNS1	protein_coding	1325
chr2	223123715	223163715	ENST00000392070	-	ENSG00000135903	PAX3	protein_coding	1050	chr2	223481056	223521056	ENST00000281828	-	ENSG00000116120	FARSB	protein_coding	1400
chr2	223481056	223521056	ENST00000281828	-	ENSG00000116120	FARSB	protein_coding	1400	chr2	223725652	223765652	ENST00000357430	+	ENSG00000123983	ACSL3	protein_coding	1675
chr2	224770104	224810104	ENST00000233055	-	ENSG00000085449	WDFY1	protein_coding	1575	chr2	224864036	224904036	ENST00000258405	-	ENSG00000135919	SERPINE2	protein_coding	1375
chr2	225867162	225907162	ENST00000435582	-	ENSG00000135905	DOCK10	protein_coding	1775	chr2	224864036	224904036	ENST00000258405	-	ENSG00000135919	SERPINE2	protein_coding	1375
chr2	229006361	229046361	ENST00000392056	-	ENSG00000153820	SPHKAP	protein_coding	1675	chr2	231044827	231084827	ENST00000258382	-	ENSG00000135899	SP110	protein_coding	800
chr2	231044827	231084827	ENST00000258382	-	ENSG00000135899	SP110	protein_coding	800	chr2	231191899	231231899	ENST00000415673	+	ENSG00000185404	SP140L	protein_coding	1000
chr2	231191899	231231899	ENST00000415673	+	ENSG00000185404	SP140L	protein_coding	1000	chr2	231280657	231320657	ENST00000264052	+	ENSG00000067066	SP100	protein_coding	1375
chr2	231577560	231617560	ENST00000258418	+	ENSG00000135932	CAB39	protein_coding	1725	chr2	231280657	231320657	ENST00000264052	+	ENSG00000067066	SP100	protein_coding	1375
chr2	232063260	232103260	ENST00000349938	+	ENSG00000135931	ARMC9	protein_coding	1050	chr2	231577560	231617560	ENST00000258418	+	ENSG00000135932	CAB39	protein_coding	1725
chr2	232825955	232865955	ENST00000273009	+	ENSG00000144535	DIS3L2	protein_coding	1550	chr2	233562015	233602015	ENST00000373566	+	ENSG00000204120	GIGYF2	protein_coding	1225
chr2	233562015	233602015	ENST00000373566	+	ENSG00000204120	GIGYF2	protein_coding	1225	chr2	234263153	234303153	ENST00000264057	+	ENSG00000077044	DGKD	protein_coding	1200
chr2	234263153	234303153	ENST00000264057	+	ENSG00000077044	DGKD	protein_coding	1200	chr2	234435428	234475428	ENST00000251722	-	ENSG00000085982	USP40	protein_coding	425
chr2	235860617	235900617	ENST00000392011	+	ENSG00000130147	SH3BP4	protein_coding	1700	chr2	236402733	236442733	ENST00000409457	+	ENSG00000157985	AGAP1	protein_coding	1375
chr2	238283018	238323018	ENST00000295550	-	ENSG00000163359	COL6A3	protein_coding	1050	chr2	238395053	238435053	ENST00000410032	+	ENSG00000115648	MLPH	protein_coding	700
chr2	238536219	238576219	ENST00000308482	+	ENSG00000124831	LRRFIP1	protein_coding	1200	chr2	238395053	238435053	ENST00000410032	+	ENSG00000115648	MLPH	protein_coding	700
chr2	239157250	239197250	ENST00000254657	-	ENSG00000132326	PER2	protein_coding	1375	chr2	239229082	239269082	ENST00000373327	+	ENSG00000204104	TRAF3IP1	protein_coding	950
chr2	242172301	242212301	ENST00000391975	-	ENSG00000115677	HDLBP	protein_coding	1025	chr2	242536864	242576864	ENST00000407315	-	ENSG00000176946	THAP4	protein_coding	1050
chr20	484482	524482	ENST00000400217	-	ENSG00000101266	CSNK2A1	protein_coding	1575	chr20	1246960	1286960	ENST00000381873	+	ENSG00000101298	SNPH	protein_coding	1925
chr20	1246960	1286960	ENST00000381873	+	ENSG00000101298	SNPH	protein_coding	1925	chr20	1306065	1346065	ENST00000446423	+	ENSG00000234684	FKBP1A-SDCBP2	lincRNA	650
chr20	1875154	1915154	ENST00000400068	+	ENSG00000198053	SIRPA	protein_coding	800	chr20	1306065	1346065	ENST00000446423	+	ENSG00000234684	FKBP1A-SDCBP2	lincRNA	650
chr20	3100842	3140842	ENST00000348031	-	ENSG00000185019	UBOX5	protein_coding	1600	chr20	3348272	3388272	ENST00000252032	-	ENSG00000088854	C20orf194	protein_coding	1575
chr20	3348272	3388272	ENST00000252032	-	ENSG00000088854	C20orf194	protein_coding	1575	chr20	3451687	3491687	ENST00000262919	+	ENSG00000088812	ATRN	protein_coding	1325
chr20	3956229	3996229	ENST00000358395	-	ENSG00000101236	RNF24	protein_coding	1250	chr20	3451687	3491687	ENST00000262919	+	ENSG00000088812	ATRN	protein_coding	1325
chr20	4942153	4982153	ENST00000424750	-	ENSG00000089057	SLC23A2	protein_coding	1175	chr20	3956229	3996229	ENST00000358395	-	ENSG00000101236	RNF24	protein_coding	1250
chr20	5931298	5971298	ENST00000378883	+	ENSG00000125885	MCM8	protein_coding	1275	chr20	4942153	4982153	ENST00000424750	-	ENSG00000089057	SLC23A2	protein_coding	1175
chr20	7960476	8000476	ENST00000246024	-	ENSG00000125827	TMX4	protein_coding	950	chr20	9049410	9089410	ENST00000407043	+	ENSG00000101333	PLCB4	protein_coding	1500
chr20	13725532	13765532	ENST00000202816	-	ENSG00000089048	ESF1	protein_coding	1050	chr20	17622940	17662940	ENST00000360807	-	ENSG00000125844	RRBP1	protein_coding	1275
chr20	17622940	17662940	ENST00000360807	-	ENSG00000125844	RRBP1	protein_coding	1275	chr20	18118499	18158499	ENST00000278816	+	ENSG00000149474	CSRP2BP	protein_coding	1075
chr20	18118499	18158499	ENST00000278816	+	ENSG00000149474	CSRP2BP	protein_coding	1075	chr20	18488199	18528199	ENST00000336714	+	ENSG00000101310	SEC23B	protein_coding	1025
chr20	18488199	18528199	ENST00000336714	+	ENSG00000101310	SEC23B	protein_coding	1025	chr20	18568537	18608537	ENST00000377452	+	ENSG00000125821	DTD1	protein_coding	975
chr20	19738352	19778352	ENST00000432334	+	ENSG00000233895	RP1-122P22.2	lincRNA	1275	chr20	18568537	18608537	ENST00000377452	+	ENSG00000125821	DTD1	protein_coding	975
chr20	21106624	21146624	ENST00000458446	+	ENSG00000088970	PLK1S1	lincRNA	625	chr20	21283942	21323942	ENST00000377191	+	ENSG00000088930	XRN2	protein_coding	1475
chr20	23362125	23402125	ENST00000377026	-	ENSG00000125814	NAPB	protein_coding	1500	chr20	25228705	25268705	ENST00000216962	+	ENSG00000100994	PYGB	protein_coding	1200
chr20	25228705	25268705	ENST00000216962	+	ENSG00000100994	PYGB	protein_coding	1200	chr20	25331619	25371619	ENST00000376542	-	ENSG00000100997	ABHD12	protein_coding	1300
chr20	25331619	25371619	ENST00000376542	-	ENSG00000100997	ABHD12	protein_coding	1300	chr20	25388363	25428363	ENST00000262460	+	ENSG00000101003	GINS1	protein_coding	1050
chr20	25526153	25566153	ENST00000278886	-	ENSG00000101004	NINL	protein_coding	950	chr20	25388363	25428363	ENST00000262460	+	ENSG00000101003	GINS1	protein_coding	1050
chr20	30271703	30311703	ENST00000450273	-	ENSG00000171552	BCL2L1	protein_coding	1375	chr20	30327074	30367074	ENST00000340513	+	ENSG00000088325	TPX2	protein_coding	1575
chr20	30697309	30737309	ENST00000398022	+	ENSG00000101337	TM9SF4	protein_coding	975	chr20	30865467	30905467	ENST00000375712	+	ENSG00000101350	KIF3B	protein_coding	1525
chr20	31291814	31331814	ENST00000446419	-	ENSG00000149600	COMMD7	protein_coding	1525	chr20	30865467	30905467	ENST00000375712	+	ENSG00000101350	KIF3B	protein_coding	1525
chr20	32077881	32117881	ENST00000471007	+	ENSG00000078699	CBFA2T2	protein_coding	1150	chr20	32399110	32439110	ENST00000217402	+	ENSG00000101421	CHMP4B	protein_coding	1625
chr20	32951041	32991041	ENST00000374864	+	ENSG00000078747	ITCH	protein_coding	1650	chr20	33373452	33413452	ENST00000359003	-	ENSG00000198646	NCOA6	protein_coding	1675
chr20	33373452	33413452	ENST00000359003	-	ENSG00000198646	NCOA6	protein_coding	1675	chr20	33640674	33680674	ENST00000252015	-	ENSG00000100991	TRPC4AP	protein_coding	1525
chr20	33959944	33999944	ENST00000374385	-	ENSG00000101019	UQCC	protein_coding	950	chr20	34043150	34083150	ENST00000397527	+	ENSG00000126001	CEP250	protein_coding	975
chr20	34359896	34399896	ENST00000461122	+	ENSG00000025293	PHF20	protein_coding	1400	chr20	34043150	34083150	ENST00000397527	+	ENSG00000126001	CEP250	protein_coding	975
chr20	35089741	35129741	ENST00000475894	+	ENSG00000080845	DLGAP4	protein_coding	1400	chr20	35452089	35492089	ENST00000237536	-	ENSG00000149639	SOGA1	protein_coding	1500
chr20	35452089	35492089	ENST00000237536	-	ENSG00000149639	SOGA1	protein_coding	1500	chr20	35684398	35724398	ENST00000373664	-	ENSG00000080839	RBL1	protein_coding	1225
chr20	35684398	35724398	ENST00000373664	-	ENSG00000080839	RBL1	protein_coding	1225	chr20	35807449	35847449	ENST00000237530	+	ENSG00000118705	RPN2	protein_coding	1525
chr20	36322408	36362408	ENST00000361383	+	ENSG00000132792	CTNNBL1	protein_coding	1425	chr20	36621870	36661870	ENST00000373447	-	ENSG00000101407	TTI1	protein_coding	1225
chr20	36621870	36661870	ENST00000373447	-	ENSG00000101407	TTI1	protein_coding	1225	chr20	36661948	36701948	ENST00000373433	+	ENSG00000101413	RPRD1B	protein_coding	1450
chr20	37590942	37630942	ENST00000373325	+	ENSG00000101452	DHX35	protein_coding	1350	chr20	36661948	36701948	ENST00000373433	+	ENSG00000101413	RPRD1B	protein_coding	1450
chr20	39657458	39697458	ENST00000361337	+	ENSG00000198900	TOP1	protein_coding	1500	chr20	40207133	40247133	ENST00000373233	-	ENSG00000124177	CHD6	protein_coding	1475
chr20	42295754	42335754	ENST00000396863	+	ENSG00000101057	MYBL2	protein_coding	1275	chr20	43595115	43635115	ENST00000372806	+	ENSG00000101109	STK4	protein_coding	1400
chr20	43595115	43635115	ENST00000372806	+	ENSG00000101109	STK4	protein_coding	1400	chr20	43991840	44031840	ENST00000419593	+	ENSG00000254806	SYS1-DBNDD2	protein_coding	850
chr20	45907805	45947805	ENST00000468376	-	ENSG00000101040	ZMYND8	protein_coding	725	chr20	46130601	46170601	ENST00000341724	+	ENSG00000124151	NCOA3	protein_coding	1650
chr20	47538427	47578427	ENST00000371917	+	ENSG00000124198	ARFGEF2	protein_coding	1275	chr20	47854963	47894963	ENST00000371754	-	ENSG00000124201	ZNFX1	protein_coding	1350
chr20	48290415	48330415	ENST00000371711	-	ENSG00000158470	B4GALT5	protein_coding	1700	chr20	48429250	48469250	ENST00000417961	+	ENSG00000197818	SLC9A8	protein_coding	1375
chr20	49126891	49166891	ENST00000371621	+	ENSG00000196396	PTPN1	protein_coding	1425	chr20	48429250	48469250	ENST00000417961	+	ENSG00000197818	SLC9A8	protein_coding	1375
chr20	50345173	50385173	ENST00000338821	-	ENSG00000054793	ATP9A	protein_coding	900	chr20	50768525	50808525	ENST00000216923	-	ENSG00000020256	ZFP64	protein_coding	750
chr20	54987168	55027168	ENST00000360314	+	ENSG00000087589	CASS4	protein_coding	1400	chr20	55043647	55083647	ENST00000023939	+	ENSG00000022277	C20orf43	protein_coding	1450
chr20	56844495	56884495	ENST00000462333	-	ENSG00000124224	PPP4R1L	protein_coding	1125	chr20	56884752	56924752	ENST00000244040	+	ENSG00000124209	RAB22A	protein_coding	1375
chr20	56964178	57004178	ENST00000475243	+	ENSG00000124164	VAPB	protein_coding	1200	chr20	56884752	56924752	ENST00000244040	+	ENSG00000124209	RAB22A	protein_coding	1375
chr20	57050187	57090187	ENST00000425773	-	ENSG00000198768	APCDD1L	protein_coding	975	chr20	57090435	57130435	ENST00000427140	+	ENSG00000231290	RP5-907D15.2	lincRNA	1125
chr20	60600866	60640866	ENST00000252996	-	ENSG00000130699	TAF4	protein_coding	1025	chr20	60813580	60853580	ENST00000313733	+	ENSG00000130703	OSBPL2	protein_coding	750
chr20	61529274	61569274	ENST00000395335	-	ENSG00000101191	DIDO1	protein_coding	2425	chr20	60813580	60853580	ENST00000313733	+	ENSG00000130703	OSBPL2	protein_coding	750
chr20	62526535	62566535	ENST00000470551	+	ENSG00000101152	DNAJC5	protein_coding	1075	chr20	62612488	62652488	ENST00000535781	+	ENSG00000101161	PRPF6	protein_coding	950
chr21	16397321	16437321	ENST00000400202	-	ENSG00000180530	NRIP1	protein_coding	1500	chr21	17102344	17142344	ENST00000351097	+	ENSG00000155313	USP25	protein_coding	1275
chr21	28298832	28338832	ENST00000284987	-	ENSG00000154736	ADAMTS5	protein_coding	725	chr21	30325277	30365277	ENST00000361371	-	ENSG00000198862	LTN1	protein_coding	1075
chr21	30325277	30365277	ENST00000361371	-	ENSG00000198862	LTN1	protein_coding	1075	chr21	30671192	30711192	ENST00000286800	+	ENSG00000156273	BACH1	protein_coding	1675
chr21	33064431	33104431	ENST00000434667	-	ENSG00000156304	SCAF4	protein_coding	1750	chr21	33725335	33765335	ENST00000382751	-	ENSG00000142207	URB1	protein_coding	1300
chr21	33725335	33765335	ENST00000382751	-	ENSG00000142207	URB1	protein_coding	1300	chr21	33784314	33824314	ENST00000469079	+	ENSG00000166979	FAM176C	protein_coding	1225
chr21	33784314	33824314	ENST00000469079	+	ENSG00000166979	FAM176C	protein_coding	1225	chr21	33824493	33864493	ENST00000464037	+	ENSG00000166979	FAM176C	protein_coding	225
chr21	34060359	34100359	ENST00000433931	-	ENSG00000159082	SYNJ1	protein_coding	1150	chr21	33824493	33864493	ENST00000464037	+	ENSG00000166979	FAM176C	protein_coding	225
chr21	34812250	34852250	ENST00000420455	-	ENSG00000142188	TMEM50B	protein_coding	500	chr21	35014706	35054706	ENST00000399353	+	ENSG00000205726	ITSN1	protein_coding	1425
chr21	36381641	36421641	ENST00000300305	-	ENSG00000159216	RUNX1	protein_coding	1225	chr21	37529080	37569080	ENST00000270190	+	ENSG00000142197	DOPEY2	protein_coding	1200
chr21	37529080	37569080	ENST00000270190	+	ENSG00000142197	DOPEY2	protein_coding	1200	chr21	37692487	37732487	ENST00000400485	+	ENSG00000159256	MORC3	protein_coding	1075
chr21	38298773	38338773	ENST00000399120	-	ENSG00000159267	HLCS	protein_coding	450	chr21	38445526	38485526	ENST00000492275	+	ENSG00000182670	TTC3	protein_coding	1525
chr21	38600262	38640262	ENST00000288304	-	ENSG00000157538	DSCR3	protein_coding	1175	chr21	38739236	38779236	ENST00000462274	+	ENSG00000157540	DYRK1A	protein_coding	1825
chr21	40645745	40685745	ENST00000333229	-	ENSG00000185658	BRWD1	protein_coding	975	chr21	38739236	38779236	ENST00000462274	+	ENSG00000157540	DYRK1A	protein_coding	1825
chr21	44394620	44434620	ENST00000291547	+	ENSG00000160199	PKNOX1	protein_coding	725	chr21	45285067	45325067	ENST00000291572	+	ENSG00000160216	AGPAT3	protein_coding	1250
chr21	45285067	45325067	ENST00000291572	+	ENSG00000160216	AGPAT3	protein_coding	1250	chr21	45432200	45472200	ENST00000380221	+	ENSG00000160218	TRAPPC10	protein_coding	1525
chr21	46825052	46865052	ENST00000400337	+	ENSG00000182871	COL18A1	protein_coding	1300	chr21	47063608	47103608	ENST00000465077	+	ENSG00000183570	PCBP3	protein_coding	875
chr21	47666211	47706211	ENST00000397708	-	ENSG00000160294	MCM3AP	protein_coding	650	chr21	47744036	47784036	ENST00000359568	+	ENSG00000160299	PCNT	protein_coding	875
chr21	47878812	47918812	ENST00000400274	+	ENSG00000160305	DIP2A	protein_coding	1450	chr21	47744036	47784036	ENST00000359568	+	ENSG00000160299	PCNT	protein_coding	875
chr22	18444267	18484267	ENST00000495076	-	ENSG00000243156	MICAL3	protein_coding	1400	chr22	18560781	18600781	ENST00000474897	+	ENSG00000215193	PEX26	protein_coding	1375
chr22	19069967	19109967	ENST00000537045	-	ENSG00000070413	DGCR2	protein_coding	1500	chr22	19466982	19506982	ENST00000407835	+	ENSG00000093009	CDC45	protein_coding	700
chr22	19466982	19506982	ENST00000407835	+	ENSG00000093009	CDC45	protein_coding	700	chr22	19802462	19842462	ENST00000329517	-	ENSG00000185838	GNB1L	protein_coding	900
chr22	19802462	19842462	ENST00000329517	-	ENSG00000185838	GNB1L	protein_coding	900	chr22	19889341	19929341	ENST00000400525	-	ENSG00000184470	TXNRD2	protein_coding	750
chr22	20810170	20850170	ENST00000328879	-	ENSG00000099910	KLHL22	protein_coding	850	chr22	21173100	21213100	ENST00000485963	-	ENSG00000241973	PI4KA	protein_coding	1550
chr22	21921836	21961836	ENST00000342192	+	ENSG00000185651	UBE2L3	protein_coding	1650	chr22	22181970	22221970	ENST00000398822	-	ENSG00000100030	MAPK1	protein_coding	1425
chr22	23412540	23452540	ENST00000248996	+	ENSG00000128266	GNAZ	protein_coding	1125	chr22	23521891	23561891	ENST00000479188	+	ENSG00000186716	BCR	protein_coding	1175
chr22	24019543	24059543	ENST00000422506	-	ENSG00000228315	GUSBP11	pseudogene	625	chr22	24129150	24169150	ENST00000344921	+	ENSG00000099956	SMARCB1	protein_coding	850
chr22	24407642	24447642	ENST00000454754	+	ENSG00000099991	CABIN1	protein_coding	1300	chr22	24129150	24169150	ENST00000344921	+	ENSG00000099956	SMARCB1	protein_coding	850
chr22	25761344	25801344	ENST00000444995	-	ENSG00000100068	LRP5L	protein_coding	1325	chr22	24407642	24447642	ENST00000454754	+	ENSG00000099991	CABIN1	protein_coding	1300
chr22	28214421	28254421	ENST00000469096	-	ENSG00000180957	PITPNB	protein_coding	700	chr22	28276122	28316122	ENST00000415296	-	ENSG00000180957	PITPNB	protein_coding	1575
chr22	29744572	29784572	ENST00000356015	-	ENSG00000100280	AP1B1	protein_coding	950	chr22	29999545	30039545	ENST00000413209	+	ENSG00000186575	NF2	protein_coding	1500
chr22	29999545	30039545	ENST00000413209	+	ENSG00000186575	NF2	protein_coding	1500	chr22	30194265	30234265	ENST00000397771	-	ENSG00000100325	ASCC2	protein_coding	850
chr22	30194265	30234265	ENST00000397771	-	ENSG00000100325	ASCC2	protein_coding	850	chr22	30279144	30319144	ENST00000401950	+	ENSG00000100330	MTMR3	protein_coding	1700
chr22	31556168	31596168	ENST00000426256	+	ENSG00000138942	RNF185	protein_coding	1100	chr22	31845810	31885810	ENST00000344710	-	ENSG00000184708	EIF4ENIF1	protein_coding	1300
chr22	31845810	31885810	ENST00000344710	-	ENSG00000184708	EIF4ENIF1	protein_coding	1300	chr22	32018418	32058418	ENST00000439502	-	ENSG00000241878	PISD	protein_coding	1525
chr22	32018418	32058418	ENST00000439502	-	ENSG00000241878	PISD	protein_coding	1525	chr22	32106120	32146120	ENST00000434485	-	ENSG00000183530	PRR14L	protein_coding	1150
chr22	32106120	32146120	ENST00000434485	-	ENSG00000183530	PRR14L	protein_coding	1150	chr22	32149965	32189965	ENST00000535622	+	ENSG00000100150	DEPDC5	protein_coding	775
chr22	33197687	33237687	ENST00000266085	+	ENSG00000100234	TIMP3	protein_coding	1650	chr22	32149965	32189965	ENST00000535622	+	ENSG00000100150	DEPDC5	protein_coding	775
chr22	36384473	36424473	ENST00000438146	-	ENSG00000100320	RBFOX2	protein_coding	1725	chr22	36744063	36784063	ENST00000216181	-	ENSG00000100345	MYH9	protein_coding	1825
chr22	38629040	38669040	ENST00000361906	-	ENSG00000198792	TMEM184B	protein_coding	1250	chr22	36744063	36784063	ENST00000216181	-	ENSG00000100345	MYH9	protein_coding	1825
chr22	40573929	40613929	ENST00000454349	+	ENSG00000100354	TNRC6B	protein_coding	1375	chr22	40992706	41032706	ENST00000466278	-	ENSG00000196588	MKL1	protein_coding	1550
chr22	40992706	41032706	ENST00000466278	-	ENSG00000196588	MKL1	protein_coding	1550	chr22	41175403	41215403	ENST00000458600	-	ENSG00000100372	SLC25A17	protein_coding	975
chr22	41175403	41215403	ENST00000458600	-	ENSG00000100372	SLC25A17	protein_coding	975	chr22	41253088	41293088	ENST00000541156	+	ENSG00000196236	XPNPEP3	protein_coding	1150
chr22	41487790	41527790	ENST00000263253	+	ENSG00000100393	EP300	protein_coding	1575	chr22	41697526	41737526	ENST00000352645	+	ENSG00000100403	ZC3H7B	protein_coding	1225
chr22	41697526	41737526	ENST00000352645	+	ENSG00000100403	ZC3H7B	protein_coding	1225	chr22	41865129	41905129	ENST00000216254	+	ENSG00000100412	ACO2	protein_coding	1500
chr22	41865129	41905129	ENST00000216254	+	ENSG00000100412	ACO2	protein_coding	1500	chr22	42017123	42057123	ENST00000360079	+	ENSG00000196419	XRCC6	protein_coding	850
chr22	43371151	43411151	ENST00000263246	-	ENSG00000100266	PACSIN2	protein_coding	1675	chr22	44420157	44460157	ENST00000338758	+	ENSG00000188677	PARVB	protein_coding	1325
chr22	45596650	45636650	ENST00000336156	-	ENSG00000100364	KIAA0930	protein_coding	425	chr22	46067678	46107678	ENST00000381061	+	ENSG00000130638	ATXN10	protein_coding	1725
chr22	47094158	47134158	ENST00000216264	-	ENSG00000100422	CERK	protein_coding	1200	chr22	47158518	47198518	ENST00000337137	+	ENSG00000054611	TBC1D22A	protein_coding	650
chr22	50181160	50221160	ENST00000404760	-	ENSG00000100425	BRD1	protein_coding	1150	chr22	50781733	50821733	ENST00000359139	+	ENSG00000100239	PPP6R2	protein_coding	1050
chr3	4468965	4508965	ENST00000272902	-	ENSG00000144455	SUMF1	protein_coding	1025	chr3	5163905	5203905	ENST00000256496	+	ENSG00000134108	ARL8B	protein_coding	1275
chr3	8543393	8583393	ENST00000157600	+	ENSG00000071282	LMCD1	protein_coding	1225	chr3	8965186	9005186	ENST00000264926	-	ENSG00000070950	RAD18	protein_coding	1675
chr3	9439299	9479299	ENST00000431285	+	ENSG00000168137	SETD5	protein_coding	1600	chr3	9691117	9731117	ENST00000353332	+	ENSG00000163719	MTMR14	protein_coding	975
chr3	9691117	9731117	ENST00000353332	+	ENSG00000163719	MTMR14	protein_coding	975	chr3	9834798	9874798	ENST00000397256	+	ENSG00000250151	ARPC4-TTLL3	protein_coding	1275
chr3	10206549	10246549	ENST00000256458	+	ENSG00000134070	IRAK2	protein_coding	650	chr3	9834798	9874798	ENST00000397256	+	ENSG00000250151	ARPC4-TTLL3	protein_coding	1275
chr3	11645398	11685398	ENST00000430365	-	ENSG00000144560	VGLL4	protein_coding	1475	chr3	12665725	12705725	ENST00000251849	-	ENSG00000132155	RAF1	protein_coding	1675
chr3	14444076	14484076	ENST00000454876	+	ENSG00000131389	SLC6A6	protein_coding	1375	chr3	14989091	15029091	ENST00000413118	+	ENSG00000177463	NR2C2	protein_coding	1550
chr3	15861278	15901278	ENST00000399451	-	ENSG00000206560	ANKRD28	protein_coding	1475	chr3	16515533	16555533	ENST00000431547	-	ENSG00000131378	RFTN1	protein_coding	1450
chr3	23244511	23284511	ENST00000425792	+	ENSG00000182247	UBE2E2	protein_coding	1550	chr3	25666398	25706398	ENST00000424225	-	ENSG00000077097	TOP2B	protein_coding	1500
chr3	25666398	25706398	ENST00000424225	-	ENSG00000077097	TOP2B	protein_coding	1500	chr3	25791530	25831530	ENST00000417874	-	ENSG00000151092	NGLY1	protein_coding	1550
chr3	27485911	27525911	ENST00000428005	-	ENSG00000033867	SLC4A7	protein_coding	1600	chr3	25791530	25831530	ENST00000417874	-	ENSG00000151092	NGLY1	protein_coding	1550
chr3	29322473	29362473	ENST00000434693	+	ENSG00000144642	RBMS3	protein_coding	1375	chr3	30647994	30687994	ENST00000295754	+	ENSG00000163513	TGFBR2	protein_coding	1725
chr3	30647994	30687994	ENST00000295754	+	ENSG00000163513	TGFBR2	protein_coding	1725	chr3	31574130	31614130	ENST00000453168	+	ENSG00000163527	STT3B	protein_coding	1575
chr3	31574130	31614130	ENST00000453168	+	ENSG00000163527	STT3B	protein_coding	1575	chr3	32433163	32473163	ENST00000334983	+	ENSG00000153551	CMTM7	protein_coding	1200
chr3	32433163	32473163	ENST00000334983	+	ENSG00000153551	CMTM7	protein_coding	1200	chr3	32572366	32612366	ENST00000273130	-	ENSG00000144635	DYNC1LI1	protein_coding	1550
chr3	33098722	33138722	ENST00000307363	-	ENSG00000170266	GLB1	protein_coding	1375	chr3	33318517	33358517	ENST00000498807	+	ENSG00000153558	FBXL2	protein_coding	1725
chr3	33318517	33358517	ENST00000498807	+	ENSG00000153558	FBXL2	protein_coding	1725	chr3	33442002	33482002	ENST00000283628	-	ENSG00000153560	UBP1	protein_coding	1550
chr3	33719848	33759848	ENST00000359576	-	ENSG00000163539	CLASP2	protein_coding	1525	chr3	33442002	33482002	ENST00000283628	-	ENSG00000153560	UBP1	protein_coding	1550
chr3	37284668	37324668	ENST00000361924	+	ENSG00000144674	GOLGA4	protein_coding	1475	chr3	37903451	37943451	ENST00000443503	+	ENSG00000144677	CTDSPL	protein_coding	1450
chr3	37903451	37943451	ENST00000443503	+	ENSG00000144677	CTDSPL	protein_coding	1450	chr3	38206996	38246996	ENST00000311806	+	ENSG00000172939	OXSR1	protein_coding	1575
chr3	38537763	38577763	ENST00000358249	+	ENSG00000157036	EXOG	protein_coding	1200	chr3	38206996	38246996	ENST00000311806	+	ENSG00000172939	OXSR1	protein_coding	1575
chr3	39093489	39133489	ENST00000302313	+	ENSG00000114742	WDR48	protein_coding	1525	chr3	38537763	38577763	ENST00000358249	+	ENSG00000157036	EXOG	protein_coding	1200
chr3	40566474	40606474	ENST00000490457	+	ENSG00000172888	ZNF621	protein_coding	1450	chr3	41963922	42003922	ENST00000301831	-	ENSG00000168038	ULK4	protein_coding	800
chr3	41963922	42003922	ENST00000301831	-	ENSG00000168038	ULK4	protein_coding	800	chr3	42055294	42095294	ENST00000487159	+	ENSG00000182606	TRAK1	protein_coding	1275
chr3	42806010	42846010	ENST00000431549	-	ENSG00000181061	HIGD1A	protein_coding	1400	chr3	43328004	43368004	ENST00000454177	+	ENSG00000163788	SNRK	protein_coding	1625
chr3	43328004	43368004	ENST00000454177	+	ENSG00000163788	SNRK	protein_coding	1625	chr3	43623560	43663560	ENST00000292246	-	ENSG00000160746	ANO10	protein_coding	1775
chr3	44803209	44843209	ENST00000326047	+	ENSG00000163808	KIF15	protein_coding	1350	chr3	45429998	45469998	ENST00000265537	+	ENSG00000011376	LARS2	protein_coding	1225
chr3	45429998	45469998	ENST00000265537	+	ENSG00000011376	LARS2	protein_coding	1225	chr3	45635816	45675816	ENST00000440097	+	ENSG00000144791	LIMD1	protein_coding	1200
chr3	45635816	45675816	ENST00000440097	+	ENSG00000144791	LIMD1	protein_coding	1200	chr3	45730678	45770678	ENST00000455997	+	ENSG00000211456	SACM1L	protein_coding	1425
chr3	47165457	47205457	ENST00000409792	-	ENSG00000181555	SETD2	protein_coding	1600	chr3	47324436	47364436	ENST00000461084	+	ENSG00000114648	KLHL18	protein_coding	1250
chr3	47783596	47823596	ENST00000425518	-	ENSG00000173473	SMARCC1	protein_coding	1125	chr3	47844399	47884399	ENST00000446256	+	ENSG00000132153	DHX30	protein_coding	200
chr3	48090769	48130769	ENST00000383737	-	ENSG00000047849	MAP4	protein_coding	1475	chr3	47844399	47884399	ENST00000446256	+	ENSG00000132153	DHX30	protein_coding	200
chr3	49409635	49449635	ENST00000418115	-	ENSG00000067560	RHOA	protein_coding	1650	chr3	49783975	49823975	ENST00000460540	-	ENSG00000176095	IP6K1	protein_coding	1375
chr3	49783975	49823975	ENST00000460540	-	ENSG00000176095	IP6K1	protein_coding	1375	chr3	49977440	50017440	ENST00000442092	+	ENSG00000004534	RBM6	protein_coding	1150
chr3	51494010	51534010	ENST00000504652	-	ENSG00000145041	VPRBP	protein_coding	1250	chr3	52148706	52188706	ENST00000394970	-	ENSG00000164087	POC1A	protein_coding	1150
chr3	52148706	52188706	ENST00000394970	-	ENSG00000164087	POC1A	protein_coding	1150	chr3	52764965	52804965	ENST00000233027	-	ENSG00000114904	NEK4	protein_coding	1150
chr3	52764965	52804965	ENST00000233027	-	ENSG00000114904	NEK4	protein_coding	1150	chr3	53341637	53381637	ENST00000480258	-	ENSG00000162290	DCP1A	processed_transcript	1400
chr3	56591189	56631189	ENST00000422222	+	ENSG00000180376	CCDC66	protein_coding	850	chr3	56677265	56717265	ENST00000355628	-	ENSG00000163946	FAM208A	protein_coding	450
chr3	57261765	57301765	ENST00000288266	+	ENSG00000157500	APPL1	protein_coding	1375	chr3	57638816	57678816	ENST00000311128	-	ENSG00000174839	FAM116A	protein_coding	1150
chr3	57638816	57678816	ENST00000311128	-	ENSG00000174839	FAM116A	protein_coding	1150	chr3	57741957	57781957	ENST00000295951	+	ENSG00000163681	SLMAP	protein_coding	1475
chr3	57994127	58034127	ENST00000295956	+	ENSG00000136068	FLNB	protein_coding	1225	chr3	57741957	57781957	ENST00000295951	+	ENSG00000163681	SLMAP	protein_coding	1475
chr3	58318607	58358607	ENST00000356151	+	ENSG00000168297	PXK	protein_coding	1550	chr3	57994127	58034127	ENST00000295956	+	ENSG00000136068	FLNB	protein_coding	1225
chr3	61547243	61587243	ENST00000495879	+	ENSG00000144724	PTPRG	protein_coding	1525	chr3	63850233	63890233	ENST00000474112	+	ENSG00000163635	ATXN7	protein_coding	1475
chr3	63850233	63890233	ENST00000474112	+	ENSG00000163635	ATXN7	protein_coding	1475	chr3	64171131	64211131	ENST00000295902	-	ENSG00000163637	PRICKLE2	protein_coding	1200
chr3	64171131	64211131	ENST00000295902	-	ENSG00000163637	PRICKLE2	protein_coding	1200	chr3	64213655	64253655	ENST00000498162	-	ENSG00000163637	PRICKLE2	protein_coding	1400
chr3	65984509	66024509	ENST00000464060	-	ENSG00000151276	MAGI1	protein_coding	1075	chr3	67665038	67705038	ENST00000307227	-	ENSG00000172340	SUCLG2	protein_coding	1450
chr3	71074077	71114077	ENST00000485326	-	ENSG00000114861	FOXP1	protein_coding	1475	chr3	72456069	72496069	ENST00000477973	-	ENSG00000163602	RYBP	protein_coding	1300
chr3	72456069	72496069	ENST00000477973	-	ENSG00000163602	RYBP	protein_coding	1300	chr3	72857631	72897631	ENST00000325599	-	ENSG00000144736	SHQ1	protein_coding	1375
chr3	72857631	72897631	ENST00000325599	-	ENSG00000144736	SHQ1	protein_coding	1375	chr3	73045936	73085936	ENST00000356692	+	ENSG00000163605	PPP4R2	protein_coding	1550
chr3	73634091	73674091	ENST00000263666	-	ENSG00000121440	PDZRN3	protein_coding	1275	chr3	73045936	73085936	ENST00000356692	+	ENSG00000163605	PPP4R2	protein_coding	1550
chr3	79028609	79068609	ENST00000436010	-	ENSG00000169855	ROBO1	protein_coding	1350	chr3	81771312	81811312	ENST00000429644	-	ENSG00000114480	GBE1	protein_coding	1325
chr3	87000257	87040257	ENST00000398399	-	ENSG00000206538	VGLL3	protein_coding	1500	chr3	88108424	88148424	ENST00000473136	+	ENSG00000229729	RP11-159G9.5	protein_coding	1500
chr3	93698983	93738983	ENST00000535334	+	ENSG00000169379	ARL13B	protein_coding	1275	chr3	97540884	97580884	ENST00000419587	+	ENSG00000233280	AC110491.1	protein_coding	1025
chr3	97540884	97580884	ENST00000419587	+	ENSG00000233280	AC110491.1	protein_coding	1025	chr3	98580533	98620533	ENST00000326840	-	ENSG00000057019	DCBLD2	protein_coding	1575
chr3	98580533	98620533	ENST00000326840	-	ENSG00000057019	DCBLD2	protein_coding	1575	chr3	99357319	99397319	ENST00000261037	+	ENSG00000144810	COL8A1	protein_coding	1475
chr3	99357319	99397319	ENST00000261037	+	ENSG00000144810	COL8A1	protein_coding	1475	chr3	99555017	99595017	ENST00000476723	-	ENSG00000168386	FILIP1L	protein_coding	1475
chr3	99979845	100019845	ENST00000344949	+	ENSG00000036054	TBC1D23	protein_coding	1625	chr3	99555017	99595017	ENST00000476723	-	ENSG00000168386	FILIP1L	protein_coding	1475
chr3	101192085	101232085	ENST00000314261	-	ENSG00000138468	SENP7	protein_coding	1350	chr3	101442769	101482769	ENST00000341893	+	ENSG00000182504	CEP97	protein_coding	1400
chr3	101442769	101482769	ENST00000341893	+	ENSG00000182504	CEP97	protein_coding	1400	chr3	101498074	101538074	ENST00000273347	+	ENSG00000144815	NXPE3	protein_coding	1150
chr3	105085753	105125753	ENST00000306107	+	ENSG00000170017	ALCAM	protein_coding	1250	chr3	105548246	105588246	ENST00000394027	-	ENSG00000114423	CBLB	protein_coding	950
chr3	106959539	106999539	ENST00000463143	+	ENSG00000243701	RP11-446H18.3	lincRNA	925	chr3	107241783	107281783	ENST00000415149	+	ENSG00000114439	BBX	protein_coding	1525
chr3	107769872	107809872	ENST00000355354	-	ENSG00000196776	CD47	protein_coding	1475	chr3	107901417	107941417	ENST00000264538	-	ENSG00000114446	IFT57	protein_coding	1350
chr3	112930329	112970329	ENST00000495514	+	ENSG00000144857	BOC	protein_coding	975	chr3	113375493	113415493	ENST00000316407	-	ENSG00000176542	KIAA2018	protein_coding	1100
chr3	113375493	113415493	ENST00000316407	-	ENSG00000176542	KIAA2018	protein_coding	1100	chr3	113465866	113505866	ENST00000273398	+	ENSG00000114573	ATP6V1A	protein_coding	1350
chr3	119013220	119053220	ENST00000264245	+	ENSG00000031081	ARHGAP31	protein_coding	1150	chr3	119773264	119813264	ENST00000264235	-	ENSG00000082701	GSK3B	protein_coding	1375
chr3	119773264	119813264	ENST00000264235	-	ENSG00000082701	GSK3B	protein_coding	1375	chr3	120130100	120170100	ENST00000295633	-	ENSG00000163430	FSTL1	protein_coding	1425
chr3	120130100	120170100	ENST00000295633	-	ENSG00000163430	FSTL1	protein_coding	1425	chr3	120421840	120461840	ENST00000473654	-	ENSG00000144840	RABL3	protein_coding	725
chr3	121428602	121468602	ENST00000340645	-	ENSG00000173230	GOLGB1	protein_coding	1200	chr3	121513926	121553926	ENST00000393650	-	ENSG00000173226	IQCB1	protein_coding	1025
chr3	122399465	122439465	ENST00000474629	+	ENSG00000173193	PARP14	protein_coding	850	chr3	121513926	121553926	ENST00000393650	-	ENSG00000173226	IQCB1	protein_coding	1025
chr3	123563178	123603178	ENST00000360772	-	ENSG00000065534	MYLK	protein_coding	1375	chr3	123640564	123680564	ENST00000433542	-	ENSG00000175455	CCDC14	protein_coding	1550
chr3	124566674	124606674	ENST00000465464	-	ENSG00000082781	ITGB5	protein_coding	1525	chr3	124734802	124774802	ENST00000311127	-	ENSG00000173706	HEG1	protein_coding	1200
chr3	127502051	127542051	ENST00000398104	-	ENSG00000074416	MGLL	protein_coding	950	chr3	127872297	127912297	ENST00000254730	+	ENSG00000132394	EEFSEC	protein_coding	1275
chr3	128444965	128484965	ENST00000265062	+	ENSG00000075785	RAB7A	protein_coding	1550	chr3	127872297	127912297	ENST00000254730	+	ENSG00000132394	EEFSEC	protein_coding	1275
chr3	129285661	129325661	ENST00000393239	-	ENSG00000004399	PLXND1	protein_coding	1350	chr3	128444965	128484965	ENST00000265062	+	ENSG00000075785	RAB7A	protein_coding	1550
chr3	130612812	130652812	ENST00000510168	+	ENSG00000017260	ATP2C1	protein_coding	1500	chr3	131060319	131100319	ENST00000502521	-	ENSG00000250608	RP11-933H2.4	processed_transcript	925
chr3	131060319	131100319	ENST00000502521	-	ENSG00000250608	RP11-933H2.4	processed_transcript	925	chr3	131181827	131221827	ENST00000511168	-	ENSG00000114686	MRPL3	protein_coding	1375
chr3	132136370	132176370	ENST00000260818	+	ENSG00000138246	DNAJC13	protein_coding	1450	chr3	132401303	132441303	ENST00000471702	-	ENSG00000113971	NPHP3	protein_coding	925
chr3	133340737	133380737	ENST00000260810	-	ENSG00000163781	TOPBP1	protein_coding	1525	chr3	133929689	133969689	ENST00000427044	-	ENSG00000163785	RYK	protein_coding	1575
chr3	135684515	135724515	ENST00000264977	+	ENSG00000073711	PPP2R3A	protein_coding	1675	chr3	136431220	136471220	ENST00000483235	-	ENSG00000118007	STAG1	protein_coding	1600
chr3	136431220	136471220	ENST00000483235	-	ENSG00000118007	STAG1	protein_coding	1600	chr3	136581050	136621050	ENST00000288986	+	ENSG00000158092	NCK1	protein_coding	1250
chr3	137906109	137946109	ENST00000481646	+	ENSG00000114098	ARMC8	protein_coding	1625	chr3	138066539	138106539	ENST00000289104	+	ENSG00000158186	MRAS	protein_coding	1150
chr3	138273198	138313198	ENST00000264982	-	ENSG00000114107	CEP70	protein_coding	1150	chr3	138066539	138106539	ENST00000289104	+	ENSG00000158186	MRAS	protein_coding	1150
chr3	138513780	138553780	ENST00000461451	-	ENSG00000051382	PIK3CB	protein_coding	1175	chr3	138273198	138313198	ENST00000264982	-	ENSG00000114107	CEP70	protein_coding	1150
chr3	139000556	139040556	ENST00000489521	+	ENSG00000175110	MRPS22	protein_coding	1275	chr3	138513780	138553780	ENST00000461451	-	ENSG00000051382	PIK3CB	protein_coding	1175
chr3	141121191	141161191	ENST00000510338	+	ENSG00000177311	ZBTB38	protein_coding	1400	chr3	141205889	141245889	ENST00000515549	+	ENSG00000155903	RASA2	protein_coding	1550
chr3	142257668	142297668	ENST00000350721	-	ENSG00000175054	ATR	protein_coding	1650	chr3	142442916	142482916	ENST00000476941	+	ENSG00000144935	TRPC1	protein_coding	1125
chr3	143691479	143731479	ENST00000493396	+	ENSG00000181744	C3orf58	protein_coding	1200	chr3	142442916	142482916	ENST00000476941	+	ENSG00000144935	TRPC1	protein_coding	1125
chr3	145928966	145968966	ENST00000354952	-	ENSG00000114698	PLSCR4	protein_coding	1225	chr3	143691479	143731479	ENST00000493396	+	ENSG00000181744	C3orf58	protein_coding	1200
chr3	148764341	148804341	ENST00000494055	-	ENSG00000071794	HLTF	protein_coding	1550	chr3	148847371	148887371	ENST00000296051	+	ENSG00000163755	HPS3	protein_coding	1150
chr3	149335888	149375888	ENST00000360632	-	ENSG00000018408	WWTR1	protein_coding	1525	chr3	149530495	149570495	ENST00000392894	+	ENSG00000082996	RNF13	protein_coding	1550
chr3	150126122	150166122	ENST00000361136	+	ENSG00000196428	TSC22D2	protein_coding	1575	chr3	149530495	149570495	ENST00000392894	+	ENSG00000082996	RNF13	protein_coding	1550
chr3	151985829	152025829	ENST00000282486	+	ENSG00000152601	MBNL1	protein_coding	1600	chr3	150126122	150166122	ENST00000361136	+	ENSG00000196428	TSC22D2	protein_coding	1575
chr3	154002286	154042286	ENST00000544526	-	ENSG00000174953	DHX36	protein_coding	1075	chr3	154797436	154837436	ENST00000460393	+	ENSG00000196549	MME	protein_coding	1175
chr3	157211408	157251408	ENST00000479987	-	ENSG00000197415	VEPH1	protein_coding	1400	chr3	158362067	158402067	ENST00000486715	+	ENSG00000168827	GFM1	protein_coding	1250
chr3	160127617	160167617	ENST00000483754	-	ENSG00000248710	RP11-432B6.3	protein_coding	1725	chr3	160243376	160283376	ENST00000334256	-	ENSG00000186432	KPNA4	protein_coding	1675
chr3	167773763	167813763	ENST00000470487	-	ENSG00000173905	GOLIM4	protein_coding	1525	chr3	169859537	169899537	ENST00000466189	-	ENSG00000173889	PHC3	protein_coding	1400
chr3	169859537	169899537	ENST00000466189	-	ENSG00000173889	PHC3	protein_coding	1400	chr3	169940153	169980153	ENST00000295797	+	ENSG00000163558	PRKCI	protein_coding	1575
chr3	171757418	171797418	ENST00000392699	+	ENSG00000075420	FNDC3B	protein_coding	1500	chr3	172389008	172429008	ENST00000538775	-	ENSG00000144959	NCEH1	protein_coding	1700
chr3	172389008	172429008	ENST00000538775	-	ENSG00000144959	NCEH1	protein_coding	1700	chr3	172468472	172508472	ENST00000232458	+	ENSG00000114346	ECT2	protein_coding	1650
chr3	176875261	176915261	ENST00000422442	-	ENSG00000177565	TBL1XR1	protein_coding	1575	chr3	178750067	178790067	ENST00000311417	-	ENSG00000172667	ZMAT3	protein_coding	1275
chr3	178750067	178790067	ENST00000311417	-	ENSG00000172667	ZMAT3	protein_coding	1275	chr3	179065480	179105480	ENST00000471841	+	ENSG00000171109	MFN1	protein_coding	1000
chr3	179065480	179105480	ENST00000471841	+	ENSG00000171109	MFN1	protein_coding	1000	chr3	179129378	179169378	ENST00000232564	-	ENSG00000114450	GNB4	protein_coding	1500
chr3	179370543	179410543	ENST00000263966	+	ENSG00000058056	USP13	protein_coding	1375	chr3	179129378	179169378	ENST00000232564	-	ENSG00000114450	GNB4	protein_coding	1500
chr3	180630090	180670090	ENST00000357559	+	ENSG00000114416	FXR1	protein_coding	1550	chr3	179370543	179410543	ENST00000263966	+	ENSG00000058056	USP13	protein_coding	1375
chr3	182511288	182551288	ENST00000323116	+	ENSG00000058063	ATP11B	protein_coding	1525	chr3	182777375	182817375	ENST00000265594	-	ENSG00000078070	MCCC1	protein_coding	1175
chr3	183415606	183455606	ENST00000421660	+	ENSG00000163872	YEATS2	protein_coding	1400	chr3	183562696	183602696	ENST00000421484	-	ENSG00000175193	PARL	protein_coding	1475
chr3	184529931	184569931	ENST00000437079	+	ENSG00000156931	VPS8	protein_coding	725	chr3	183562696	183602696	ENST00000421484	-	ENSG00000175193	PARL	protein_coding	1475
chr3	185786901	185826901	ENST00000306376	-	ENSG00000244405	ETV5	protein_coding	1250	chr3	186969810	187009810	ENST00000337774	-	ENSG00000127241	MASP1	protein_coding	900
chr3	186969810	187009810	ENST00000337774	-	ENSG00000127241	MASP1	protein_coding	900	chr3	187871072	187911072	ENST00000448637	+	ENSG00000145012	LPP	protein_coding	1625
chr3	191046866	191086866	ENST00000392455	+	ENSG00000152492	CCDC50	protein_coding	1500	chr3	192595950	192635950	ENST00000392452	-	ENSG00000180611	MB21D2	protein_coding	1725
chr3	195123807	195163807	ENST00000326793	-	ENSG00000114331	ACAP2	protein_coding	1425	chr3	195595955	195635955	ENST00000333602	-	ENSG00000061938	TNK2	protein_coding	2075
chr3	196466728	196506728	ENST00000327134	+	ENSG00000180370	PAK2	protein_coding	1525	chr3	196594727	196634727	ENST00000323460	+	ENSG00000119231	SENP5	protein_coding	1675
chr3	196986171	197026171	ENST00000419354	-	ENSG00000075711	DLG1	protein_coding	1275	chr3	196594727	196634727	ENST00000323460	+	ENSG00000119231	SENP5	protein_coding	1675
chr3	197423773	197463773	ENST00000389665	-	ENSG00000145016	KIAA0226	protein_coding	1450	chr3	197518106	197558106	ENST00000438796	+	ENSG00000186001	LRCH3	protein_coding	1275
chr4	331609	371609	ENST00000512994	+	ENSG00000131127	ZNF141	protein_coding	850	chr4	492989	532989	ENST00000296306	+	ENSG00000174227	PIGG	protein_coding	900
chr4	1283639	1323639	ENST00000303400	+	ENSG00000090316	MAEA	protein_coding	1275	chr4	1873151	1913151	ENST00000508803	+	ENSG00000109685	WHSC1	protein_coding	1675
chr4	2794750	2834750	ENST00000452765	+	ENSG00000087266	SH3BP2	protein_coding	650	chr4	3076408	3116408	ENST00000355072	+	ENSG00000197386	HTT	protein_coding	1725
chr4	3076408	3116408	ENST00000355072	+	ENSG00000197386	HTT	protein_coding	1725	chr4	3294755	3334755	ENST00000506631	+	ENSG00000159788	RGS12	protein_coding	1375
chr4	4504073	4544073	ENST00000507908	-	ENSG00000168818	STX18	protein_coding	1600	chr4	5671275	5711275	ENST00000475313	-	ENSG00000173040	EVC2	protein_coding	875
chr4	5671275	5711275	ENST00000475313	-	ENSG00000173040	EVC2	protein_coding	875	chr4	5712924	5752924	ENST00000382674	+	ENSG00000072840	EVC	protein_coding	1050
chr4	6988889	7028889	ENST00000451522	+	ENSG00000132405	TBC1D14	protein_coding	850	chr4	7901653	7941653	ENST00000358461	-	ENSG00000196526	AFAP1	protein_coding	1600
chr4	7901653	7941653	ENST00000358461	-	ENSG00000196526	AFAP1	protein_coding	1600	chr4	8402450	8442450	ENST00000413009	-	ENSG00000087008	ACOX3	protein_coding	800
chr4	10078573	10118573	ENST00000382451	-	ENSG00000071127	WDR1	protein_coding	775	chr4	8402450	8442450	ENST00000413009	-	ENSG00000087008	ACOX3	protein_coding	800
chr4	13589347	13629347	ENST00000040738	-	ENSG00000038219	BOD1L1	protein_coding	1375	chr4	15471489	15511489	ENST00000413206	+	ENSG00000048342	CC2D2A	protein_coding	2025
chr4	15471489	15511489	ENST00000413206	+	ENSG00000048342	CC2D2A	protein_coding	2025	chr4	16860432	16900432	ENST00000304523	-	ENSG00000169744	LDB2	protein_coding	1175
chr4	16860432	16900432	ENST00000304523	-	ENSG00000169744	LDB2	protein_coding	1175	chr4	17473712	17513712	ENST00000513615	-	ENSG00000151552	QDPR	protein_coding	550
chr4	24546173	24586173	ENST00000336812	-	ENSG00000109606	DHX15	protein_coding	1450	chr4	24874600	24914600	ENST00000505471	-	ENSG00000181982	CCDC149	protein_coding	850
chr4	24874600	24914600	ENST00000505471	-	ENSG00000181982	CCDC149	protein_coding	850	chr4	25162285	25202285	ENST00000512921	+	ENSG00000038210	PI4K2B	protein_coding	1125
chr4	37647998	37687998	ENST00000454158	-	ENSG00000181826	RELL1	protein_coding	1375	chr4	37978931	38018931	ENST00000446803	+	ENSG00000065882	TBC1D1	protein_coding	1475
chr4	38869372	38909372	ENST00000515037	+	ENSG00000197712	FAM114A1	protein_coding	1325	chr4	39046659	39086659	ENST00000261425	+	ENSG00000109790	KLHL5	protein_coding	1500
chr4	39327995	39367995	ENST00000381897	-	ENSG00000035928	RFC1	protein_coding	1500	chr4	39600710	39640710	ENST00000295958	-	ENSG00000163683	C4orf34	protein_coding	1650
chr4	39600710	39640710	ENST00000295958	-	ENSG00000163683	C4orf34	protein_coding	1650	chr4	39699664	39739664	ENST00000261427	+	ENSG00000078140	UBE2K	protein_coding	1300
chr4	39939576	39979576	ENST00000503396	-	ENSG00000121892	PDS5A	protein_coding	1450	chr4	39699664	39739664	ENST00000261427	+	ENSG00000078140	UBE2K	protein_coding	1300
chr4	41992489	42032489	ENST00000264451	+	ENSG00000014824	SLC30A9	protein_coding	1275	chr4	39939576	39979576	ENST00000503396	-	ENSG00000121892	PDS5A	protein_coding	1450
chr4	47487305	47527305	ENST00000273859	+	ENSG00000145246	ATP10D	protein_coding	1000	chr4	47876653	47916653	ENST00000464756	-	ENSG00000170448	NFXL1	protein_coding	1600
chr4	48343339	48383339	ENST00000264313	+	ENSG00000109171	SLAIN2	protein_coding	1450	chr4	48742339	48782339	ENST00000502520	-	ENSG00000075539	FRYL	protein_coding	975
chr4	52709166	52749166	ENST00000509376	+	ENSG00000109184	DCUN1D4	protein_coding	1550	chr4	52917497	52957497	ENST00000295213	+	ENSG00000163071	SPATA18	protein_coding	775
chr4	53485502	53525502	ENST00000441222	-	ENSG00000109189	USP46	protein_coding	1300	chr4	52917497	52957497	ENST00000295213	+	ENSG00000163071	SPATA18	protein_coding	775
chr4	54192242	54232242	ENST00000401642	-	ENSG00000184178	SCFD2	protein_coding	1700	chr4	54243812	54283812	ENST00000358575	+	ENSG00000145216	FIP1L1	protein_coding	1600
chr4	54890857	54930857	ENST00000263921	-	ENSG00000109220	CHIC2	protein_coding	1525	chr4	55095264	55135264	ENST00000257290	+	ENSG00000134853	PDGFRA	protein_coding	1475
chr4	56373305	56413305	ENST00000513440	-	ENSG00000134852	CLOCK	protein_coding	1325	chr4	56815147	56855147	ENST00000257287	+	ENSG00000174799	CEP135	protein_coding	1400
chr4	57261781	57301781	ENST00000264220	-	ENSG00000128059	PPAT	protein_coding	1625	chr4	56815147	56855147	ENST00000257287	+	ENSG00000174799	CEP135	protein_coding	1400
chr4	57936551	57976551	ENST00000295666	-	ENSG00000163453	IGFBP7	protein_coding	1525	chr4	57261781	57301781	ENST00000264220	-	ENSG00000128059	PPAT	protein_coding	1625
chr4	68526897	68566897	ENST00000322244	-	ENSG00000033178	UBA6	protein_coding	1600	chr4	68567079	68607079	ENST00000500538	+	ENSG00000248049	RP11-453E17.1	lincRNA	1125
chr4	71570141	71610141	ENST00000503876	+	ENSG00000018189	RUFY3	protein_coding	2300	chr4	71768043	71808043	ENST00000502869	+	ENSG00000173542	MOB1B	protein_coding	1575
chr4	72053003	72093003	ENST00000425175	+	ENSG00000080493	SLC4A4	protein_coding	1550	chr4	71768043	71808043	ENST00000502869	+	ENSG00000173542	MOB1B	protein_coding	1575
chr4	74084515	74124515	ENST00000561029	-	ENSG00000132466	ANKRD17	protein_coding	1575	chr4	75023829	75063829	ENST00000331145	+	ENSG00000163738	MTHFD2L	protein_coding	1050
chr4	76649762	76689762	ENST00000508939	+	ENSG00000138768	USO1	protein_coding	1175	chr4	77610724	77650724	ENST00000486758	+	ENSG00000138771	SHROOM3	protein_coding	1575
chr4	77610724	77650724	ENST00000486758	+	ENSG00000138771	SHROOM3	protein_coding	1575	chr4	77870856	77910856	ENST00000264893	+	ENSG00000138758	SEPT11	protein_coding	1375
chr4	78700769	78740769	ENST00000512485	-	ENSG00000138767	CNOT6L	protein_coding	1325	chr4	77870856	77910856	ENST00000264893	+	ENSG00000138758	SEPT11	protein_coding	1375
chr4	79697496	79737496	ENST00000389010	+	ENSG00000138756	BMP2K	protein_coding	1575	chr4	79820548	79860548	ENST00000295462	-	ENSG00000163291	PAQR3	protein_coding	1450
chr4	80846251	80886251	ENST00000491345	-	ENSG00000163297	ANTXR2	protein_coding	2050	chr4	80954626	80994626	ENST00000404191	-	ENSG00000163297	ANTXR2	protein_coding	1325
chr4	81188096	81228096	ENST00000507780	+	ENSG00000138675	FGF5	protein_coding	1500	chr4	80954626	80994626	ENST00000404191	-	ENSG00000163297	ANTXR2	protein_coding	1325
chr4	83781691	83821691	ENST00000355196	-	ENSG00000138674	SEC31A	protein_coding	1675	chr4	83955600	83995600	ENST00000509093	+	ENSG00000138663	COPS4	protein_coding	1400
chr4	85847544	85887544	ENST00000322366	-	ENSG00000163625	WDFY3	protein_coding	1425	chr4	86699859	86739859	ENST00000395183	+	ENSG00000138639	ARHGAP24	protein_coding	1425
chr4	86699859	86739859	ENST00000395183	+	ENSG00000138639	ARHGAP24	protein_coding	1425	chr4	87515468	87555468	ENST00000427191	+	ENSG00000163629	PTPN13	protein_coding	1675
chr4	87515468	87555468	ENST00000427191	+	ENSG00000163629	PTPN13	protein_coding	1675	chr4	87856154	87896154	ENST00000504956	+	ENSG00000172493	AFF1	protein_coding	800
chr4	87856154	87896154	ENST00000504956	+	ENSG00000172493	AFF1	protein_coding	800	chr4	87928140	87968140	ENST00000307808	+	ENSG00000172493	AFF1	protein_coding	1350
chr4	88928820	88968820	ENST00000237596	+	ENSG00000118762	PKD2	protein_coding	1525	chr4	89513574	89553574	ENST00000402738	+	ENSG00000138641	HERC3	protein_coding	1275
chr4	95128762	95168762	ENST00000359052	+	ENSG00000163104	SMARCAD1	protein_coding	775	chr4	95373038	95413038	ENST00000437932	+	ENSG00000163110	PDLIM5	protein_coding	1350
chr4	99182535	99222535	ENST00000509011	+	ENSG00000138698	RAP1GDS1	protein_coding	1450	chr4	99539780	99579780	ENST00000305798	-	ENSG00000168785	TSPAN5	protein_coding	1675
chr4	102229435	102269435	ENST00000529324	-	ENSG00000138814	PPP3CA	protein_coding	1775	chr4	103642151	103682151	ENST00000226578	-	ENSG00000109323	MANBA	protein_coding	1400
chr4	103642151	103682151	ENST00000226578	-	ENSG00000109323	MANBA	protein_coding	1400	chr4	104079566	104119566	ENST00000265148	-	ENSG00000138778	CENPE	protein_coding	650
chr4	106067032	106107032	ENST00000305737	+	ENSG00000168769	TET2	protein_coding	1725	chr4	106355238	106395238	ENST00000341695	-	ENSG00000138777	PPA2	protein_coding	900
chr4	107197861	107237861	ENST00000432496	-	ENSG00000145348	TBCK	protein_coding	1375	chr4	106355238	106395238	ENST00000341695	-	ENSG00000138777	PPA2	protein_coding	900
chr4	108512960	108552960	ENST00000514815	-	ENSG00000138801	PAPSS1	protein_coding	1850	chr4	108601608	108641608	ENST00000265174	-	ENSG00000138801	PAPSS1	protein_coding	1300
chr4	108745719	108785719	ENST00000506462	+	ENSG00000164023	SGMS2	protein_coding	1425	chr4	108601608	108641608	ENST00000265174	-	ENSG00000138801	PAPSS1	protein_coding	1300
chr4	110354928	110394928	ENST00000504968	+	ENSG00000138802	SEC24B	protein_coding	1600	chr4	111080355	111120355	ENST00000503885	-	ENSG00000170522	ELOVL6	protein_coding	900
chr4	114643083	114683083	ENST00000454265	-	ENSG00000145349	CAMK2D	protein_coding	1850	chr4	114860857	114900857	ENST00000315366	-	ENSG00000180801	ARSJ	protein_coding	1325
chr4	119234158	119274158	ENST00000296498	-	ENSG00000164099	PRSS12	protein_coding	1525	chr4	120133791	120173791	ENST00000274030	+	ENSG00000145390	USP53	protein_coding	1375
chr4	120133791	120173791	ENST00000274030	+	ENSG00000145390	USP53	protein_coding	1375	chr4	120510146	120550146	ENST00000354960	-	ENSG00000138735	PDE5A	protein_coding	1850
chr4	121804025	121844025	ENST00000394435	-	ENSG00000138738	PRDM5	protein_coding	1200	chr4	123073488	123113488	ENST00000264501	+	ENSG00000138688	KIAA1109	protein_coding	1225
chr4	123073488	123113488	ENST00000264501	+	ENSG00000138688	KIAA1109	protein_coding	1225	chr4	123747863	123787863	ENST00000264498	+	ENSG00000138685	FGF2	protein_coding	1700
chr4	123747863	123787863	ENST00000264498	+	ENSG00000138685	FGF2	protein_coding	1700	chr4	123844229	123884229	ENST00000274008	+	ENSG00000145375	SPATA5	protein_coding	1550
chr4	125593887	125633887	ENST00000504087	-	ENSG00000151458	ANKRD50	protein_coding	1300	chr4	126237554	126277554	ENST00000394329	+	ENSG00000196159	FAT4	protein_coding	1250
chr4	128847150	128887150	ENST00000515130	-	ENSG00000164073	MFSD8	protein_coding	1150	chr4	128982423	129022423	ENST00000326639	+	ENSG00000138709	LARP1B	protein_coding	1200
chr4	129730779	129770779	ENST00000226319	+	ENSG00000077684	PHF17	protein_coding	1800	chr4	129974764	130014764	ENST00000434680	-	ENSG00000151466	SCLT1	protein_coding	1775
chr4	134070470	134110470	ENST00000264360	+	ENSG00000138650	PCDH10	protein_coding	1550	chr4	129974764	130014764	ENST00000434680	-	ENSG00000151466	SCLT1	protein_coding	1775
chr4	139123503	139163503	ENST00000280612	-	ENSG00000151012	SLC7A11	protein_coding	1350	chr4	140058372	140098372	ENST00000394235	-	ENSG00000109381	ELF2	protein_coding	1350
chr4	140058372	140098372	ENST00000394235	-	ENSG00000109381	ELF2	protein_coding	1350	chr4	140222609	140262609	ENST00000296543	+	ENSG00000164134	NAA15	protein_coding	1350
chr4	140437928	140477928	ENST00000274031	-	ENSG00000145391	SETD7	protein_coding	1225	chr4	140222609	140262609	ENST00000296543	+	ENSG00000164134	NAA15	protein_coding	1350
chr4	141637274	141677274	ENST00000442267	-	ENSG00000109436	TBC1D9	protein_coding	1375	chr4	142014616	142054616	ENST00000306799	-	ENSG00000170153	RNF150	protein_coding	1450
chr4	144257915	144297915	ENST00000262995	+	ENSG00000109458	GAB1	protein_coding	1100	chr4	144434616	144474616	ENST00000283131	+	ENSG00000153147	SMARCA5	protein_coding	1475
chr4	145979693	146019693	ENST00000514390	-	ENSG00000164162	ANAPC10	protein_coding	1375	chr4	146061313	146101313	ENST00000447906	-	ENSG00000164164	OTUD4	protein_coding	1325
chr4	146819787	146859787	ENST00000508784	-	ENSG00000151612	ZNF827	protein_coding	1400	chr4	146061313	146101313	ENST00000447906	-	ENSG00000164164	OTUD4	protein_coding	1325
chr4	148538537	148578537	ENST00000508208	+	ENSG00000164168	TMEM184C	protein_coding	2025	chr4	148653214	148693214	ENST00000336498	+	ENSG00000071205	ARHGAP10	protein_coding	1325
chr4	150999426	151039426	ENST00000296550	+	ENSG00000170390	DCLK2	protein_coding	1625	chr4	148653214	148693214	ENST00000336498	+	ENSG00000071205	ARHGAP10	protein_coding	1325
chr4	153416172	153456172	ENST00000281708	-	ENSG00000109670	FBXW7	protein_coding	1350	chr4	153561317	153601317	ENST00000304385	-	ENSG00000170006	TMEM154	protein_coding	800
chr4	153561317	153601317	ENST00000304385	-	ENSG00000170006	TMEM154	protein_coding	800	chr4	153701089	153741089	ENST00000451320	+	ENSG00000164144	ARFIP1	protein_coding	1450
chr4	157852546	157892546	ENST00000502773	-	ENSG00000145431	PDGFC	protein_coding	1450	chr4	160025330	160065330	ENST00000505478	+	ENSG00000109756	RAPGEF2	protein_coding	1000
chr4	160025330	160065330	ENST00000505478	+	ENSG00000109756	RAPGEF2	protein_coding	1000	chr4	160149406	160189406	ENST00000504604	+	ENSG00000109756	RAPGEF2	protein_coding	600
chr4	164048042	164088042	ENST00000422287	-	ENSG00000145414	NAF1	protein_coding	1275	chr4	160149406	160189406	ENST00000504604	+	ENSG00000109756	RAPGEF2	protein_coding	600
chr4	169361665	169401665	ENST00000511577	-	ENSG00000181381	DDX60L	protein_coding	825	chr4	169753156	169793156	ENST00000393726	+	ENSG00000129116	PALLD	protein_coding	1475
chr4	170152256	170192256	ENST00000284637	-	ENSG00000154447	SH3RF1	protein_coding	1750	chr4	169753156	169793156	ENST00000393726	+	ENSG00000129116	PALLD	protein_coding	1475
chr4	175165415	175205415	ENST00000393674	-	ENSG00000164117	FBXO8	protein_coding	1425	chr4	177673881	177713881	ENST00000280193	-	ENSG00000150630	VEGFC	protein_coding	1475
chr4	175205055	175245055	ENST00000457424	+	ENSG00000164118	CEP44	protein_coding	875	chr4	177673881	177713881	ENST00000280193	-	ENSG00000150630	VEGFC	protein_coding	1475
chr4	177673881	177713881	ENST00000280193	-	ENSG00000150630	VEGFC	protein_coding	1475	chr4	178230990	178270990	ENST00000264596	+	ENSG00000109674	NEIL3	protein_coding	1525
chr4	184020446	184060446	ENST00000403733	+	ENSG00000151718	WWC2	protein_coding	1550	chr4	185707972	185747972	ENST00000515030	-	ENSG00000151726	ACSL1	protein_coding	1325
chr4	185707972	185747972	ENST00000515030	-	ENSG00000151726	ACSL1	protein_coding	1325	chr4	186085155	186125155	ENST00000458385	-	ENSG00000164323	KIAA1430	protein_coding	1400
chr5	1255162	1295162	ENST00000310581	-	ENSG00000164362	TERT	protein_coding	175	chr5	1484092	1524092	ENST00000283415	-	ENSG00000153395	LPCAT1	protein_coding	825
chr5	5422807	5462807	ENST00000296564	+	ENSG00000164151	KIAA0947	protein_coding	1475	chr5	6714718	6754718	ENST00000230859	+	ENSG00000112941	PAPD7	protein_coding	1275
chr5	9506187	9546187	ENST00000382496	-	ENSG00000112902	SEMA5A	protein_coding	1325	chr5	10353815	10393815	ENST00000449913	+	ENSG00000145495	2013-03-06	protein_coding	1475
chr5	10353815	10393815	ENST00000449913	+	ENSG00000145495	2013-03-06	protein_coding	1475	chr5	10564442	10604442	ENST00000504806	+	ENSG00000164236	ANKRD33B	protein_coding	1500
chr5	10564442	10604442	ENST00000504806	+	ENSG00000164236	ANKRD33B	protein_coding	1500	chr5	10721384	10761384	ENST00000230895	-	ENSG00000112977	DAP	protein_coding	1525
chr5	14143811	14183811	ENST00000502816	+	ENSG00000038382	TRIO	protein_coding	1725	chr5	14831887	14871887	ENST00000284268	-	ENSG00000154122	ANKH	protein_coding	1350
chr5	17217669	17257669	ENST00000322611	+	ENSG00000176788	BASP1	protein_coding	1600	chr5	14831887	14871887	ENST00000284268	-	ENSG00000154122	ANKH	protein_coding	1350
chr5	31492216	31532216	ENST00000513349	-	ENSG00000113360	DROSHA	protein_coding	650	chr5	32134456	32174456	ENST00000265070	-	ENSG00000113384	GOLPH3	protein_coding	1125
chr5	32134456	32174456	ENST00000265070	-	ENSG00000113384	GOLPH3	protein_coding	1125	chr5	32273115	32313115	ENST00000382142	-	ENSG00000150712	MTMR12	protein_coding	1000
chr5	32273115	32313115	ENST00000382142	-	ENSG00000150712	MTMR12	protein_coding	1000	chr5	32404867	32444867	ENST00000265069	-	ENSG00000056097	ZFR	protein_coding	1350
chr5	33852297	33892297	ENST00000504830	-	ENSG00000151388	ADAMTS12	protein_coding	1425	chr5	34656342	34696342	ENST00000265109	+	ENSG00000039560	RAI14	protein_coding	1200
chr5	36202381	36242381	ENST00000506945	-	ENSG00000152620	NADKD1	protein_coding	1575	chr5	36876861	36916861	ENST00000282516	+	ENSG00000164190	NIPBL	protein_coding	1300
chr5	36876861	36916861	ENST00000282516	+	ENSG00000164190	NIPBL	protein_coding	1300	chr5	37209530	37249530	ENST00000274258	-	ENSG00000197603	C5orf42	protein_coding	675
chr5	37209530	37249530	ENST00000274258	-	ENSG00000197603	C5orf42	protein_coding	675	chr5	37331283	37371283	ENST00000231498	-	ENSG00000113569	NUP155	protein_coding	1225
chr5	38805870	38845870	ENST00000513480	-	ENSG00000249740	CTD-2127H9.1	lincRNA	1125	chr5	38845960	38885960	ENST00000502536	+	ENSG00000145623	OSMR	protein_coding	1375
chr5	39034510	39074510	ENST00000357387	-	ENSG00000164327	RICTOR	protein_coding	1550	chr5	38845960	38885960	ENST00000502536	+	ENSG00000145623	OSMR	protein_coding	1375
chr5	41830621	41870621	ENST00000196371	-	ENSG00000083720	OXCT1	protein_coding	1325	chr5	43027521	43067521	ENST00000503152	-	ENSG00000177738	CTD-2201E18.3	lincRNA	700
chr5	43027521	43067521	ENST00000503152	-	ENSG00000177738	CTD-2201E18.3	lincRNA	700	chr5	43120985	43160985	ENST00000515326	+	ENSG00000172262	ZNF131	protein_coding	1400
chr5	43602825	43642825	ENST00000264663	+	ENSG00000112992	NNT	protein_coding	1325	chr5	43120985	43160985	ENST00000515326	+	ENSG00000172262	ZNF131	protein_coding	1400
chr5	52083730	52123730	ENST00000282588	+	ENSG00000213949	ITGA1	protein_coding	2300	chr5	52285156	52325156	ENST00000296585	+	ENSG00000164171	ITGA2	protein_coding	1900
chr5	52856463	52896463	ENST00000507026	+	ENSG00000164258	NDUFS4	protein_coding	1675	chr5	52285156	52325156	ENST00000296585	+	ENSG00000164171	ITGA2	protein_coding	1900
chr5	54563550	54603550	ENST00000251636	-	ENSG00000067248	DHX29	protein_coding	1475	chr5	54603588	54643588	ENST00000230640	+	ENSG00000039123	SKIV2L2	protein_coding	1575
chr5	54790878	54830878	ENST00000307259	-	ENSG00000067113	PPAP2A	protein_coding	1300	chr5	54603588	54643588	ENST00000230640	+	ENSG00000039123	SKIV2L2	protein_coding	1575
chr5	56111401	56151401	ENST00000399503	+	ENSG00000095015	MAP3K1	protein_coding	1700	chr5	54790878	54830878	ENST00000307259	-	ENSG00000067113	PPAP2A	protein_coding	1300
chr5	59956017	59996017	ENST00000512452	-	ENSG00000035499	DEPDC1B	protein_coding	1525	chr5	60200900	60240900	ENST00000439176	-	ENSG00000049167	ERCC8	protein_coding	1225
chr5	60200900	60240900	ENST00000439176	-	ENSG00000049167	ERCC8	protein_coding	1225	chr5	60240956	60280956	ENST00000296597	+	ENSG00000164182	NDUFAF2	protein_coding	1400
chr5	60628100	60668100	ENST00000252744	+	ENSG00000130449	ZSWIM6	protein_coding	1525	chr5	60240956	60280956	ENST00000296597	+	ENSG00000164182	NDUFAF2	protein_coding	1400
chr5	61601989	61641989	ENST00000401507	+	ENSG00000068796	KIF2A	protein_coding	1550	chr5	60628100	60668100	ENST00000252744	+	ENSG00000130449	ZSWIM6	protein_coding	1525
chr5	64024512	64064512	ENST00000513458	-	ENSG00000153006	SREK1IP1	protein_coding	1525	chr5	64920543	64960543	ENST00000399438	+	ENSG00000113597	C5orf44	protein_coding	900
chr5	64920543	64960543	ENST00000399438	+	ENSG00000113597	C5orf44	protein_coding	900	chr5	64978862	65018862	ENST00000506816	-	ENSG00000197860	SGTB	protein_coding	1525
chr5	65018023	65058023	ENST00000380985	+	ENSG00000123213	NLN	protein_coding	1025	chr5	64920543	64960543	ENST00000399438	+	ENSG00000113597	C5orf44	protein_coding	900
chr5	65222303	65262303	ENST00000284037	+	ENSG00000112851	ERBB2IP	protein_coding	1275	chr5	65018023	65058023	ENST00000380985	+	ENSG00000123213	NLN	protein_coding	1025
chr5	66300448	66340448	ENST00000261569	+	ENSG00000069020	MAST4	protein_coding	1275	chr5	65222303	65262303	ENST00000284037	+	ENSG00000112851	ERBB2IP	protein_coding	1275
chr5	68530700	68570700	ENST00000256443	+	ENSG00000134058	CDK7	protein_coding	1350	chr5	70751442	70791442	ENST00000358731	+	ENSG00000145734	BDP1	protein_coding	1200
chr5	70751442	70791442	ENST00000358731	+	ENSG00000145734	BDP1	protein_coding	1200	chr5	71403061	71443061	ENST00000296755	+	ENSG00000131711	MAP1B	protein_coding	1500
chr5	71403061	71443061	ENST00000296755	+	ENSG00000131711	MAP1B	protein_coding	1500	chr5	71576088	71616088	ENST00000261413	-	ENSG00000113048	MRPS27	protein_coding	1300
chr5	72251808	72291808	ENST00000430046	+	ENSG00000157107	FCHO2	protein_coding	1175	chr5	72921983	72961983	ENST00000296794	+	ENSG00000214944	RP11-428C6.1	protein_coding	1700
chr5	74023196	74063196	ENST00000296805	-	ENSG00000164347	GFM2	protein_coding	1350	chr5	74767963	74807963	ENST00000380494	-	ENSG00000113163	COL4A3BP	protein_coding	1325
chr5	74767963	74807963	ENST00000380494	-	ENSG00000113163	COL4A3BP	protein_coding	1325	chr5	74973313	75013313	ENST00000380475	-	ENSG00000152359	POC5	protein_coding	1050
chr5	76748421	76788421	ENST00000296679	-	ENSG00000164253	WDR41	protein_coding	1175	chr5	77032185	77072185	ENST00000380377	-	ENSG00000171530	TBCA	protein_coding	1100
chr5	77550579	77590579	ENST00000255194	-	ENSG00000132842	AP3B1	protein_coding	1200	chr5	77904718	77944718	ENST00000512759	-	ENSG00000145685	LHFPL2	protein_coding	1100
chr5	78908243	78948243	ENST00000453514	+	ENSG00000164329	PAPD4	protein_coding	1350	chr5	79511898	79551898	ENST00000512721	-	ENSG00000164300	SERINC5	protein_coding	1325
chr5	79511898	79551898	ENST00000512721	-	ENSG00000164300	SERINC5	protein_coding	1325	chr5	79703832	79743832	ENST00000338008	+	ENSG00000039319	ZFYVE16	protein_coding	1100
chr5	79950467	79990467	ENST00000265081	+	ENSG00000113318	MSH3	protein_coding	1250	chr5	79703832	79743832	ENST00000338008	+	ENSG00000039319	ZFYVE16	protein_coding	1100
chr5	81007616	81047616	ENST00000507655	-	ENSG00000145687	SSBP2	protein_coding	1550	chr5	79950467	79990467	ENST00000265081	+	ENSG00000113318	MSH3	protein_coding	1250
chr5	87564733	87604733	ENST00000504922	+	ENSG00000247828	TMEM161B-AS1	lincRNA	575	chr5	93407404	93447404	ENST00000502503	-	ENSG00000113391	FAM172A	protein_coding	1200
chr5	93407404	93447404	ENST00000502503	-	ENSG00000113391	FAM172A	protein_coding	1200	chr5	93954052	93994052	ENST00000265140	+	ENSG00000133302	ANKRD32	protein_coding	1450
chr5	94850711	94890711	ENST00000358746	-	ENSG00000198677	TTC37	protein_coding	1200	chr5	95066879	95106879	ENST00000379982	+	ENSG00000164292	RHOBTB3	protein_coding	1100
chr5	95066879	95106879	ENST00000379982	+	ENSG00000164292	RHOBTB3	protein_coding	1100	chr5	95118430	95158430	ENST00000508780	-	ENSG00000173221	GLRX	protein_coding	1100
chr5	95257775	95297775	ENST00000237853	-	ENSG00000118985	ELL2	protein_coding	1750	chr5	95118430	95158430	ENST00000508780	-	ENSG00000173221	GLRX	protein_coding	1100
chr5	98264875	98304875	ENST00000513175	+	ENSG00000248489	CTD-2007H13.3	processed_transcript	900	chr5	95257775	95297775	ENST00000237853	-	ENSG00000118985	ELL2	protein_coding	1750
chr5	102089685	102129685	ENST00000505654	+	ENSG00000145730	PAM	protein_coding	1425	chr5	102201430	102241430	ENST00000438793	+	ENSG00000145730	PAM	protein_coding	850
chr5	102455904	102495904	ENST00000321521	+	ENSG00000145725	PPIP5K2	protein_coding	1300	chr5	102201430	102241430	ENST00000438793	+	ENSG00000145730	PAM	protein_coding	850
chr5	107677799	107717799	ENST00000542267	-	ENSG00000145743	FBXL17	protein_coding	1425	chr5	108083523	108123523	ENST00000536402	+	ENSG00000151422	FER	protein_coding	1225
chr5	108083523	108123523	ENST00000536402	+	ENSG00000151422	FER	protein_coding	1225	chr5	108133815	108173815	ENST00000438717	+	ENSG00000151422	FER	protein_coding	225
chr5	108705695	108745695	ENST00000361189	-	ENSG00000198961	PJA2	protein_coding	1675	chr5	109025067	109065067	ENST00000261483	+	ENSG00000112893	MAN2A1	protein_coding	1475
chr5	111052891	111092891	ENST00000509025	-	ENSG00000134986	NREP	protein_coding	600	chr5	112218236	112258236	ENST00000379638	-	ENSG00000129625	REEP5	protein_coding	1375
chr5	112218236	112258236	ENST00000379638	-	ENSG00000129625	REEP5	protein_coding	1375	chr5	112312399	112352399	ENST00000515408	+	ENSG00000172795	DCP2	protein_coding	1350
chr5	112849380	112889380	ENST00000161863	+	ENSG00000047188	YTHDC2	protein_coding	1425	chr5	112312399	112352399	ENST00000515408	+	ENSG00000172795	DCP2	protein_coding	1350
chr5	114558569	114598569	ENST00000419445	-	ENSG00000164219	PGGT1B	protein_coding	1475	chr5	115420688	115460688	ENST00000274458	+	ENSG00000145781	COMMD10	protein_coding	1450
chr5	118406900	118446900	ENST00000503802	+	ENSG00000172869	DMXL1	protein_coding	1100	chr5	121297656	121337656	ENST00000339397	+	ENSG00000151304	SRFBP1	protein_coding	1450
chr5	121297656	121337656	ENST00000339397	+	ENSG00000151304	SRFBP1	protein_coding	1450	chr5	122719286	122759286	ENST00000508442	-	ENSG00000168944	CEP120	protein_coding	1350
chr5	125758838	125798838	ENST00000515200	+	ENSG00000155324	GRAMD3	protein_coding	1600	chr5	126112315	126152315	ENST00000460265	+	ENSG00000113368	LMNB1	protein_coding	1475
chr5	126112315	126152315	ENST00000460265	+	ENSG00000113368	LMNB1	protein_coding	1475	chr5	126326500	126366500	ENST00000308660	-	ENSG00000173926	2013-03-03	protein_coding	1550
chr5	127378792	127418792	ENST00000499346	-	ENSG00000245937	CTC-228N24.3	lincRNA	1325	chr5	127419458	127459458	ENST00000262461	+	ENSG00000064651	SLC12A2	protein_coding	1050
chr5	131092710	131132710	ENST00000510461	-	ENSG00000217128	FNIP1	protein_coding	1150	chr5	131630136	131670136	ENST00000200652	+	ENSG00000197208	SLC22A4	protein_coding	1350
chr5	131630136	131670136	ENST00000200652	+	ENSG00000197208	SLC22A4	protein_coding	1350	chr5	131746328	131786328	ENST00000378953	+	ENSG00000197536	C5orf56	protein_coding	1125
chr5	131892616	131932616	ENST00000378823	+	ENSG00000113522	RAD50	protein_coding	1350	chr5	132033330	132073330	ENST00000378746	-	ENSG00000131437	KIF3A	protein_coding	1175
chr5	132259326	132299326	ENST00000265343	-	ENSG00000072364	AFF4	protein_coding	1625	chr5	132387654	132427654	ENST00000304858	+	ENSG00000170606	HSPA4	protein_coding	1725
chr5	133521762	133561762	ENST00000519718	-	ENSG00000113558	SKP1	protein_coding	1400	chr5	133861345	133901345	ENST00000448712	+	ENSG00000043143	PHF15	protein_coding	1325
chr5	133861345	133901345	ENST00000448712	+	ENSG00000043143	PHF15	protein_coding	1325	chr5	133984479	134024479	ENST00000398844	+	ENSG00000113615	SEC24A	protein_coding	1600
chr5	133984479	134024479	ENST00000398844	+	ENSG00000113615	SEC24A	protein_coding	1600	chr5	134094469	134134469	ENST00000507392	+	ENSG00000145833	DDX46	protein_coding	1000
chr5	134240596	134280596	ENST00000254908	+	ENSG00000132570	PCBD2	protein_coding	2550	chr5	134094469	134134469	ENST00000507392	+	ENSG00000145833	DDX46	protein_coding	1000
chr5	134695577	134735577	ENST00000304332	-	ENSG00000113648	H2AFY	protein_coding	1425	chr5	134240596	134280596	ENST00000254908	+	ENSG00000132570	PCBD2	protein_coding	2550
chr5	137328775	137368775	ENST00000425075	-	ENSG00000031003	FAM13B	protein_coding	1525	chr5	137627524	137667524	ENST00000323760	-	ENSG00000158402	CDC25C	protein_coding	1300
chr5	138494087	138534087	ENST00000394817	-	ENSG00000120725	SIL1	protein_coding	1225	chr5	138940751	138980751	ENST00000253815	+	ENSG00000131508	UBE2D2	protein_coding	1600
chr5	141488070	141528070	ENST00000253814	+	ENSG00000131507	NDFIP1	protein_coding	1425	chr5	138940751	138980751	ENST00000253815	+	ENSG00000131508	UBE2D2	protein_coding	1600
chr5	145583113	145623113	ENST00000506502	+	ENSG00000091009	RBM27	protein_coding	1225	chr5	146793522	146833522	ENST00000398514	-	ENSG00000113657	DPYSL3	protein_coding	875
chr5	146793522	146833522	ENST00000398514	-	ENSG00000113657	DPYSL3	protein_coding	875	chr5	146849619	146889619	ENST00000343218	-	ENSG00000113657	DPYSL3	protein_coding	1250
chr5	147763498	147803498	ENST00000340253	+	ENSG00000145868	FBXO38	protein_coding	1150	chr5	148521046	148561046	ENST00000326685	+	ENSG00000173210	ABLIM3	protein_coding	1475
chr5	148521046	148561046	ENST00000326685	+	ENSG00000173210	ABLIM3	protein_coding	1475	chr5	148651434	148691434	ENST00000296721	+	ENSG00000157510	AFAP1L1	protein_coding	1200
chr5	148891007	148931007	ENST00000377843	-	ENSG00000113712	CSNK1A1	protein_coding	1875	chr5	148651434	148691434	ENST00000296721	+	ENSG00000157510	AFAP1L1	protein_coding	1200
chr5	149379884	149419884	ENST00000503427	+	ENSG00000113716	HMGXB3	protein_coding	1475	chr5	149495423	149535423	ENST00000261799	-	ENSG00000113721	PDGFRB	protein_coding	1075
chr5	150497443	150537443	ENST00000354546	-	ENSG00000197043	ANXA6	protein_coding	1250	chr5	151151471	151191471	ENST00000394123	+	ENSG00000145907	G3BP1	protein_coding	1375
chr5	153418528	153458528	ENST00000520327	+	ENSG00000037749	MFAP3	protein_coding	1500	chr5	153570290	153610290	ENST00000425427	+	ENSG00000164574	GALNT10	protein_coding	1025
chr5	156962783	157002783	ENST00000257527	-	ENSG00000135074	ADAM19	protein_coding	1425	chr5	157246183	157286183	ENST00000411809	-	ENSG00000113282	CLINT1	protein_coding	1650
chr5	159506430	159546430	ENST00000456329	-	ENSG00000170234	PWWP2A	protein_coding	725	chr5	157246183	157286183	ENST00000411809	-	ENSG00000113282	CLINT1	protein_coding	1650
chr5	169367744	169407744	ENST00000377365	-	ENSG00000204767	FAM196B	protein_coding	1100	chr5	170288874	170328874	ENST00000443155	+	ENSG00000204764	RANBP17	protein_coding	1150
chr5	171393877	171433877	ENST00000296933	-	ENSG00000072803	FBXW11	protein_coding	1450	chr5	171575390	171615390	ENST00000176763	-	ENSG00000072786	STK10	protein_coding	1300
chr5	171575390	171615390	ENST00000176763	-	ENSG00000072786	STK10	protein_coding	1300	chr5	171671075	171711075	ENST00000393792	-	ENSG00000168246	UBTD2	protein_coding	1650
chr5	171841527	171881527	ENST00000311601	-	ENSG00000174705	SH3PXD2B	protein_coding	1075	chr5	171671075	171711075	ENST00000393792	-	ENSG00000168246	UBTD2	protein_coding	1650
chr5	172068269	172108269	ENST00000520919	+	ENSG00000214357	NEURL1B	protein_coding	1225	chr5	172261278	172301278	ENST00000393784	+	ENSG00000113719	ERGIC1	protein_coding	1000
chr5	172261278	172301278	ENST00000393784	+	ENSG00000113719	ERGIC1	protein_coding	1000	chr5	172410760	172450760	ENST00000519374	+	ENSG00000113732	ATP6V0E1	protein_coding	1650
chr5	172410760	172450760	ENST00000519374	+	ENSG00000113732	ATP6V0E1	protein_coding	1650	chr5	172483355	172523355	ENST00000296953	+	ENSG00000164463	CREBRF	protein_coding	1250
chr5	174905398	174945398	ENST00000321442	+	ENSG00000164466	SFXN1	protein_coding	1425	chr5	175875356	175915356	ENST00000261942	+	ENSG00000113194	FAF2	protein_coding	1375
chr5	175875356	175915356	ENST00000261942	+	ENSG00000113194	FAF2	protein_coding	1375	chr5	176449697	176489697	ENST00000358149	+	ENSG00000113761	ZNF346	protein_coding	1175
chr5	176449697	176489697	ENST00000358149	+	ENSG00000113761	ZNF346	protein_coding	1175	chr5	176560080	176600080	ENST00000354179	+	ENSG00000165671	NSD1	protein_coding	1250
chr5	178732431	178772431	ENST00000251582	-	ENSG00000087116	ADAMTS2	protein_coding	1800	chr5	178977559	179017559	ENST00000319449	+	ENSG00000176783	RUFY1	protein_coding	1125
chr5	179294859	179334859	ENST00000356834	-	ENSG00000197226	TBC1D9B	protein_coding	950	chr5	179459118	179499118	ENST00000521389	-	ENSG00000113269	RNF130	protein_coding	1525
chr5	179921417	179961417	ENST00000261951	+	ENSG00000113300	CNOT6	protein_coding	1050	chr5	179459118	179499118	ENST00000521389	-	ENSG00000113269	RNF130	protein_coding	1525
chr6	292097	332097	ENST00000344450	+	ENSG00000112679	DUSP22	protein_coding	1175	chr6	653117	693117	ENST00000448181	-	ENSG00000112685	EXOC2	protein_coding	875
chr6	3064092	3104092	ENST00000490396	+	ENSG00000137275	RIPK1	protein_coding	1675	chr6	3259218	3299218	ENST00000451246	+	ENSG00000180822	PSMG4	protein_coding	1400
chr6	4021501	4061501	ENST00000480058	+	ENSG00000112739	PRPF4B	protein_coding	1350	chr6	3259218	3299218	ENST00000451246	+	ENSG00000180822	PSMG4	protein_coding	1400
chr6	5221172	5261172	ENST00000330636	-	ENSG00000214113	LYRM4	protein_coding	1300	chr6	5261584	5301584	ENST00000274680	+	ENSG00000145982	FARS2	protein_coding	1125
chr6	7273440	7313440	ENST00000474597	-	ENSG00000124783	SSR1	protein_coding	1225	chr6	7541808	7581808	ENST00000379802	+	ENSG00000096696	DSP	protein_coding	1200
chr6	8062763	8102763	ENST00000397456	-	ENSG00000265818	EEF1E1-MUTED	protein_coding	1400	chr6	7541808	7581808	ENST00000379802	+	ENSG00000096696	DSP	protein_coding	1200
chr6	11094039	11134039	ENST00000376935	+	ENSG00000224531	C6orf228	protein_coding	1425	chr6	11192915	11232915	ENST00000379446	-	ENSG00000111859	NEDD9	protein_coding	1450
chr6	12008995	12048995	ENST00000491710	+	ENSG00000095951	HIVEP1	protein_coding	1225	chr6	11192915	11232915	ENST00000379446	-	ENSG00000111859	NEDD9	protein_coding	1450
chr6	13288776	13328776	ENST00000421203	-	ENSG00000145979	TBC1D7	protein_coding	1000	chr6	13924677	13964677	ENST00000488763	+	ENSG00000180537	RNF182	protein_coding	1300
chr6	15246527	15286527	ENST00000341776	+	ENSG00000008083	JARID2	protein_coding	1475	chr6	15623289	15663289	ENST00000513680	-	ENSG00000047579	DTNBP1	protein_coding	625
chr6	16721721	16761721	ENST00000436367	-	ENSG00000124788	ATXN1	protein_coding	1300	chr6	17393447	17433447	ENST00000229922	+	ENSG00000112186	CAP2	protein_coding	1100
chr6	17393447	17433447	ENST00000229922	+	ENSG00000112186	CAP2	protein_coding	1100	chr6	17666656	17706656	ENST00000537253	-	ENSG00000124789	NUP153	protein_coding	1475
chr6	17947800	17987800	ENST00000259711	-	ENSG00000137177	KIF13A	protein_coding	1050	chr6	18225054	18265054	ENST00000397239	-	ENSG00000124795	DEK	protein_coding	1775
chr6	18225054	18265054	ENST00000397239	-	ENSG00000124795	DEK	protein_coding	1775	chr6	18387581	18427581	ENST00000259939	+	ENSG00000137393	RNF144B	protein_coding	1700
chr6	20172670	20212670	ENST00000541730	-	ENSG00000172197	MBOAT1	protein_coding	1550	chr6	20534688	20574688	ENST00000378624	+	ENSG00000145996	CDKAL1	protein_coding	1475
chr6	24871195	24911195	ENST00000259698	-	ENSG00000111913	FAM65B	protein_coding	1275	chr6	25279306	25319306	ENST00000461945	+	ENSG00000079691	LRRC16A	protein_coding	1375
chr6	30253911	30293911	ENST00000453558	-	ENSG00000242996	HCG17	lincRNA	975	chr6	31368479	31408479	ENST00000414046	+	ENSG00000206337	HCP5	processed_transcript	1375
chr6	33588522	33628522	ENST00000374316	+	ENSG00000096433	ITPR3	protein_coding	1200	chr6	34320451	34360451	ENST00000358797	-	ENSG00000112664	NUDT3	protein_coding	1725
chr6	34320451	34360451	ENST00000358797	-	ENSG00000112664	NUDT3	protein_coding	1725	chr6	34624636	34664636	ENST00000374026	-	ENSG00000196821	C6orf106	protein_coding	1550
chr6	35310335	35350335	ENST00000360694	+	ENSG00000112033	PPARD	protein_coding	1250	chr6	35849119	35889119	ENST00000373825	-	ENSG00000096063	SRPK1	protein_coding	1075
chr6	35849119	35889119	ENST00000373825	-	ENSG00000096063	SRPK1	protein_coding	1075	chr6	35995488	36035488	ENST00000229795	+	ENSG00000112062	MAPK14	protein_coding	1600
chr6	36410544	36450544	ENST00000373731	+	ENSG00000112078	KCTD20	protein_coding	1325	chr6	36475247	36515247	ENST00000229812	-	ENSG00000112079	STK38	protein_coding	1425
chr6	37225548	37265548	ENST00000373491	+	ENSG00000065491	TBC1D22B	protein_coding	1375	chr6	37321748	37361748	ENST00000373479	+	ENSG00000112130	RNF8	protein_coding	1275
chr6	37787275	37827275	ENST00000287218	+	ENSG00000156639	ZFAND3	protein_coding	1800	chr6	37321748	37361748	ENST00000373479	+	ENSG00000112130	RNF8	protein_coding	1275
chr6	38567924	38607924	ENST00000497373	-	ENSG00000183826	BTBD9	protein_coding	1425	chr6	37787275	37827275	ENST00000287218	+	ENSG00000156639	ZFAND3	protein_coding	1800
chr6	39760142	39800142	ENST00000274867	+	ENSG00000146122	DAAM2	protein_coding	800	chr6	38567924	38607924	ENST00000497373	-	ENSG00000183826	BTBD9	protein_coding	1425
chr6	41514164	41554164	ENST00000373060	+	ENSG00000137166	FOXP4	protein_coding	950	chr6	42379789	42419789	ENST00000372917	-	ENSG00000124496	TRERF1	protein_coding	1550
chr6	42379789	42419789	ENST00000372917	-	ENSG00000124496	TRERF1	protein_coding	1550	chr6	42531800	42571800	ENST00000372899	+	ENSG00000024048	UBR2	protein_coding	1475
chr6	42531800	42571800	ENST00000372899	+	ENSG00000024048	UBR2	protein_coding	1475	chr6	42584855	42624855	ENST00000372883	+	ENSG00000024048	UBR2	protein_coding	425
chr6	42749813	42789813	ENST00000314073	+	ENSG00000112624	KIAA0240	protein_coding	1025	chr6	42584855	42624855	ENST00000372883	+	ENSG00000024048	UBR2	protein_coding	425
chr6	43044006	43084006	ENST00000230419	+	ENSG00000112655	PTK7	protein_coding	1575	chr6	42749813	42789813	ENST00000314073	+	ENSG00000112624	KIAA0240	protein_coding	1025
chr6	43503812	43543812	ENST00000265351	-	ENSG00000124571	XPO5	protein_coding	925	chr6	43543922	43583922	ENST00000535400	+	ENSG00000170734	POLH	protein_coding	1175
chr6	44355262	44395262	ENST00000371477	+	ENSG00000096401	CDC5L	protein_coding	1125	chr6	43543922	43583922	ENST00000535400	+	ENSG00000170734	POLH	protein_coding	1175
chr6	45389773	45429773	ENST00000478660	+	ENSG00000124813	RUNX2	protein_coding	1550	chr6	44355262	44395262	ENST00000371477	+	ENSG00000096401	CDC5L	protein_coding	1125
chr6	47237641	47277641	ENST00000296861	-	ENSG00000146072	TNFRSF21	protein_coding	1025	chr6	47445525	47485525	ENST00000359314	+	ENSG00000198087	CD2AP	protein_coding	1875
chr6	52401713	52441713	ENST00000182527	-	ENSG00000065308	TRAM2	protein_coding	1325	chr6	52886600	52926600	ENST00000356971	-	ENSG00000112144	ICK	protein_coding	1675
chr6	52886600	52926600	ENST00000356971	-	ENSG00000112144	ICK	protein_coding	1675	chr6	53173947	53213947	ENST00000370918	-	ENSG00000012660	ELOVL5	protein_coding	1600
chr6	53173947	53213947	ENST00000370918	-	ENSG00000012660	ELOVL5	protein_coding	1600	chr6	53369927	53409927	ENST00000229416	-	ENSG00000001084	GCLC	protein_coding	1875
chr6	53659295	53699295	ENST00000487251	+	ENSG00000137269	LRRC1	protein_coding	1250	chr6	53369927	53409927	ENST00000229416	-	ENSG00000001084	GCLC	protein_coding	1875
chr6	56676749	56716749	ENST00000520645	-	ENSG00000151914	DST	protein_coding	2425	chr6	56779426	56819426	ENST00000449297	-	ENSG00000151914	DST	protein_coding	1050
chr6	57182422	57222422	ENST00000389488	+	ENSG00000146143	PRIM2	processed_transcript	1125	chr6	56779426	56819426	ENST00000449297	-	ENSG00000151914	DST	protein_coding	1050
chr6	64345725	64385725	ENST00000506783	+	ENSG00000118482	PHF3	protein_coding	1525	chr6	71377479	71417479	ENST00000316999	+	ENSG00000112305	SMAP1	protein_coding	1300
chr6	71377479	71417479	ENST00000316999	+	ENSG00000112305	SMAP1	protein_coding	1300	chr6	72089969	72129969	ENST00000436803	-	ENSG00000233237	LINC00472	lincRNA	1500
chr6	73331520	73371520	ENST00000342056	+	ENSG00000185760	KCNQ5	protein_coding	1250	chr6	73979938	74019938	ENST00000370384	-	ENSG00000135314	KHDC1	protein_coding	1050
chr6	73979938	74019938	ENST00000370384	-	ENSG00000135314	KHDC1	protein_coding	1050	chr6	74323878	74363878	ENST00000355773	-	ENSG00000119899	SLC17A5	protein_coding	800
chr6	74323878	74363878	ENST00000355773	-	ENSG00000119899	SLC17A5	protein_coding	800	chr6	74405508	74445508	ENST00000437994	+	ENSG00000156535	CD109	protein_coding	1200
chr6	75875767	75915767	ENST00000322507	-	ENSG00000111799	COL12A1	protein_coding	1775	chr6	76458909	76498909	ENST00000369981	+	ENSG00000196586	MYO6	protein_coding	1250
chr6	79747953	79787953	ENST00000275034	-	ENSG00000146247	PHIP	protein_coding	1300	chr6	82421529	82461529	ENST00000412306	-	ENSG00000112773	FAM46A	protein_coding	825
chr6	82421529	82461529	ENST00000412306	-	ENSG00000112773	FAM46A	protein_coding	825	chr6	82917471	82957471	ENST00000369751	-	ENSG00000005700	IBTK	protein_coding	825
chr6	83777385	83817385	ENST00000237163	+	ENSG00000083097	DOPEY1	protein_coding	1500	chr6	84100797	84140797	ENST00000543031	-	ENSG00000065833	ME1	protein_coding	1275
chr6	84569362	84609362	ENST00000369681	+	ENSG00000065615	CYB5R4	protein_coding	1100	chr6	84100797	84140797	ENST00000543031	-	ENSG00000065833	ME1	protein_coding	1275
chr6	86159809	86199809	ENST00000257770	+	ENSG00000135318	NT5E	protein_coding	1575	chr6	84569362	84609362	ENST00000369681	+	ENSG00000065615	CYB5R4	protein_coding	1100
chr6	87865267	87905267	ENST00000369577	+	ENSG00000188994	ZNF292	protein_coding	1700	chr6	86159809	86199809	ENST00000257770	+	ENSG00000135318	NT5E	protein_coding	1575
chr6	89633348	89673348	ENST00000265607	-	ENSG00000111880	RNGTT	protein_coding	1400	chr6	90539650	90579650	ENST00000551025	+	ENSG00000118412	CASP8AP2	processed_transcript	825
chr6	90539650	90579650	ENST00000551025	+	ENSG00000118412	CASP8AP2	processed_transcript	825	chr6	91256764	91296764	ENST00000369329	-	ENSG00000135341	MAP3K7	protein_coding	1575
chr6	99355849	99395849	ENST00000229971	-	ENSG00000112234	FBXL4	protein_coding	1500	chr6	101289248	101329248	ENST00000324696	-	ENSG00000112249	ASCC3	protein_coding	1725
chr6	105810959	105850959	ENST00000369110	-	ENSG00000085377	PREP	protein_coding	1300	chr6	106733666	106773666	ENST00000369070	-	ENSG00000057663	ATG5	protein_coding	1525
chr6	106733666	106773666	ENST00000369070	-	ENSG00000057663	ATG5	protein_coding	1525	chr6	106959730	106999730	ENST00000369066	+	ENSG00000112297	AIM1	protein_coding	675
chr6	107740768	107780768	ENST00000369031	-	ENSG00000164494	PDSS2	protein_coding	900	chr6	108239393	108279393	ENST00000369002	-	ENSG00000025796	SEC63	protein_coding	1850
chr6	108239393	108279393	ENST00000369002	-	ENSG00000025796	SEC63	protein_coding	1850	chr6	108542464	108582464	ENST00000230085	-	ENSG00000112335	SNX3	protein_coding	1325
chr6	109376022	109416022	ENST00000436639	-	ENSG00000080546	SESN1	protein_coding	1200	chr6	109416313	109456313	ENST00000521277	+	ENSG00000183137	CEP57L1	protein_coding	1325
chr6	110461207	110501207	ENST00000392588	-	ENSG00000112290	WASF1	protein_coding	1525	chr6	110501344	110541344	ENST00000368932	+	ENSG00000168438	CDC40	protein_coding	1600
chr6	111096840	111136840	ENST00000323817	-	ENSG00000155111	CDK19	protein_coding	1650	chr6	111303218	111343218	ENST00000441448	+	ENSG00000197498	RPF2	protein_coding	1400
chr6	111764918	111804918	ENST00000422377	-	ENSG00000009413	REV3L	protein_coding	1675	chr6	111887481	111927481	ENST00000340026	-	ENSG00000056972	TRAF3IP2	protein_coding	1050
chr6	111804744	111844744	ENST00000438298	+	ENSG00000231889	TRAF3IP2-AS1	lincRNA	1925	chr6	111887481	111927481	ENST00000340026	-	ENSG00000056972	TRAF3IP2	protein_coding	1050
chr6	116422012	116462012	ENST00000319550	+	ENSG00000178425	NT5DC1	protein_coding	900	chr6	116691010	116731010	ENST00000537543	+	ENSG00000111817	DSE	protein_coding	1350
chr6	117002350	117042350	ENST00000368564	+	ENSG00000196911	KPNA5	protein_coding	875	chr6	116691010	116731010	ENST00000537543	+	ENSG00000111817	DSE	protein_coding	1350
chr6	117803820	117843820	ENST00000368503	+	ENSG00000164465	DCBLD1	protein_coding	1725	chr6	117883691	117923691	ENST00000052569	-	ENSG00000047932	GOPC	protein_coding	1025
chr6	118933710	118973710	ENST00000483035	-	ENSG00000111860	CEP85L	protein_coding	1700	chr6	119175520	119215520	ENST00000505485	-	ENSG00000111877	MCM9	protein_coding	1400
chr6	128801870	128841870	ENST00000368227	-	ENSG00000152894	PTPRK	protein_coding	1525	chr6	129204342	129244342	ENST00000421865	+	ENSG00000196569	LAMA2	protein_coding	1450
chr6	129991370	130031370	ENST00000275189	-	ENSG00000146376	ARHGAP18	protein_coding	1700	chr6	130686879	130726879	ENST00000296978	+	ENSG00000164484	TMEM200A	protein_coding	1425
chr6	130686879	130726879	ENST00000296978	+	ENSG00000164484	TMEM200A	protein_coding	1425	chr6	131251623	131291623	ENST00000529208	-	ENSG00000079819	EPB41L2	protein_coding	575
chr6	131251623	131291623	ENST00000529208	-	ENSG00000079819	EPB41L2	protein_coding	575	chr6	131344462	131384462	ENST00000337057	-	ENSG00000079819	EPB41L2	protein_coding	1450
chr6	132129156	132169156	ENST00000360971	+	ENSG00000197594	ENPP1	protein_coding	1450	chr6	132682684	132722684	ENST00000367963	-	ENSG00000079931	MOXD1	protein_coding	1500
chr6	132682684	132722684	ENST00000367963	-	ENSG00000079931	MOXD1	protein_coding	1500	chr6	132794337	132834337	ENST00000367937	-	ENSG00000079950	STX7	protein_coding	1475
chr6	135336036	135376036	ENST00000367837	-	ENSG00000112339	HBS1L	protein_coding	1550	chr6	135778914	135818914	ENST00000265602	-	ENSG00000135541	AHI1	protein_coding	1150
chr6	135778914	135818914	ENST00000265602	-	ENSG00000135541	AHI1	protein_coding	1150	chr6	136172834	136212834	ENST00000308191	+	ENSG00000171408	PDE7B	protein_coding	1050
chr6	137073656	137113656	ENST00000359015	-	ENSG00000197442	MAP3K5	protein_coding	1800	chr6	137143718	137183718	ENST00000541292	+	ENSG00000112357	PEX7	protein_coding	800
chr6	139269398	139309398	ENST00000258062	-	ENSG00000135597	REPS1	protein_coding	1450	chr6	139456249	139496249	ENST00000367658	+	ENSG00000112406	HECA	protein_coding	1450
chr6	142468367	142508367	ENST00000367630	+	ENSG00000009844	VTA1	protein_coding	1650	chr6	143226338	143266338	ENST00000367603	-	ENSG00000010818	HIVEP2	protein_coding	1225
chr6	143226338	143266338	ENST00000367603	-	ENSG00000010818	HIVEP2	protein_coding	1225	chr6	143381633	143421633	ENST00000367601	+	ENSG00000146416	AIG1	protein_coding	725
chr6	143999102	144039102	ENST00000440869	+	ENSG00000112419	PHACTR2	protein_coding	1500	chr6	144289541	144329541	ENST00000392307	-	ENSG00000118495	PLAGL1	protein_coding	1525
chr6	144606837	144646837	ENST00000433557	+	ENSG00000152818	UTRN	protein_coding	1525	chr6	144289541	144329541	ENST00000392307	-	ENSG00000118495	PLAGL1	protein_coding	1525
chr6	146245559	146285559	ENST00000519632	-	ENSG00000146414	SHPRH	protein_coding	1225	chr6	147525561	147565561	ENST00000546097	+	ENSG00000164506	STXBP5	protein_coding	1125
chr6	147525561	147565561	ENST00000546097	+	ENSG00000164506	STXBP5	protein_coding	1125	chr6	148593440	148633440	ENST00000367469	+	ENSG00000111961	SASH1	protein_coding	800
chr6	148593440	148633440	ENST00000367469	+	ENSG00000111961	SASH1	protein_coding	800	chr6	149068464	149108464	ENST00000367463	+	ENSG00000111962	UST	protein_coding	1475
chr6	149827174	149867174	ENST00000253329	-	ENSG00000131013	PPIL4	protein_coding	1375	chr6	150070579	150110579	ENST00000367384	+	ENSG00000120265	PCMT1	protein_coding	1325
chr6	151186685	151226685	ENST00000367321	+	ENSG00000120254	MTHFD1L	protein_coding	1675	chr6	151733259	151773259	ENST00000367303	-	ENSG00000155906	RMND1	protein_coding	1175
chr6	152662355	152702355	ENST00000471834	-	ENSG00000131018	SYNE1	protein_coding	1200	chr6	151733259	151773259	ENST00000367303	-	ENSG00000155906	RMND1	protein_coding	1175
chr6	154791793	154831793	ENST00000367213	-	ENSG00000153721	CNKSR3	protein_coding	1675	chr6	155054459	155094459	ENST00000367178	+	ENSG00000213079	SCAF8	protein_coding	1525
chr6	155054459	155094459	ENST00000367178	+	ENSG00000213079	SCAF8	protein_coding	1525	chr6	155316488	155356488	ENST00000545347	+	ENSG00000146426	TIAM2	protein_coding	850
chr6	155595618	155635618	ENST00000470239	-	ENSG00000029639	TFB1M	protein_coding	850	chr6	155316488	155356488	ENST00000545347	+	ENSG00000146426	TIAM2	protein_coding	850
chr6	158244281	158284281	ENST00000539592	+	ENSG00000130340	SNX9	protein_coding	1675	chr6	158402888	158442888	ENST00000367121	+	ENSG00000078269	SYNJ2	protein_coding	1750
chr6	160390131	160430131	ENST00000356956	+	ENSG00000197081	IGF2R	protein_coding	1525	chr6	161412759	161452759	ENST00000366919	+	ENSG00000085511	MAP3K4	protein_coding	1725
chr6	161412759	161452759	ENST00000366919	+	ENSG00000085511	MAP3K4	protein_coding	1725	chr6	161655093	161695093	ENST00000320285	-	ENSG00000026652	AGPAT4	protein_coding	850
chr6	167001460	167041460	ENST00000511034	-	ENSG00000071242	RPS6KA2	protein_coding	1275	chr6	167412670	167452670	ENST00000366847	+	ENSG00000213066	FGFR1OP	protein_coding	1425
chr6	168227602	168267602	ENST00000400825	+	ENSG00000130396	MLLT4	protein_coding	1725	chr6	167412670	167452670	ENST00000366847	+	ENSG00000213066	FGFR1OP	protein_coding	1425
chr7	192969	232969	ENST00000313766	+	ENSG00000177706	FAM20C	protein_coding	725	chr7	766338	806338	ENST00000313147	+	ENSG00000164818	HEATR2	protein_coding	1225
chr7	766338	806338	ENST00000313147	+	ENSG00000164818	HEATR2	protein_coding	1225	chr7	975185	1015185	ENST00000457254	-	ENSG00000240230	COX19	protein_coding	1075
chr7	2598632	2638632	ENST00000404984	+	ENSG00000106012	IQCE	protein_coding	850	chr7	2843958	2883958	ENST00000275364	-	ENSG00000146535	GNA12	protein_coding	1450
chr7	4721940	4761940	ENST00000328914	+	ENSG00000164916	FOXK1	protein_coding	1400	chr7	5013683	5053683	ENST00000494947	+	ENSG00000196204	RNF216P1	pseudogene	1150
chr7	5423177	5463177	ENST00000399537	-	ENSG00000182095	TNRC18	protein_coding	1575	chr7	5781370	5821370	ENST00000389902	-	ENSG00000011275	RNF216	protein_coding	1500
chr7	6144515	6184515	ENST00000306177	+	ENSG00000106346	USP42	protein_coding	1500	chr7	6272275	6312275	ENST00000482460	-	ENSG00000008256	CYTH3	protein_coding	1575
chr7	6483821	6523821	ENST00000436575	-	ENSG00000164535	DAGLB	protein_coding	1025	chr7	6272275	6312275	ENST00000482460	-	ENSG00000008256	CYTH3	protein_coding	1575
chr7	7196565	7236565	ENST00000429911	+	ENSG00000106392	C1GALT1	protein_coding	525	chr7	7606503	7646503	ENST00000340080	+	ENSG00000164654	MIOS	protein_coding	1150
chr7	16645442	16685442	ENST00000306999	-	ENSG00000106524	ANKMY2	protein_coding	1375	chr7	16685756	16725756	ENST00000258761	+	ENSG00000136261	BZW2	protein_coding	1350
chr7	17338246	17378246	ENST00000242057	+	ENSG00000106546	AHR	protein_coding	1600	chr7	17940124	17980124	ENST00000444712	-	ENSG00000071189	SNX13	protein_coding	1325
chr7	17940124	17980124	ENST00000444712	-	ENSG00000071189	SNX13	protein_coding	1325	chr7	18535333	18575333	ENST00000413380	+	ENSG00000048052	HDAC9	protein_coding	2575
chr7	18535333	18575333	ENST00000413380	+	ENSG00000048052	HDAC9	protein_coding	2575	chr7	19116547	19156547	ENST00000443687	-	ENSG00000122691	TWIST1	protein_coding	1275
chr7	21945702	21985702	ENST00000406877	-	ENSG00000164649	CDCA7L	protein_coding	1025	chr7	23013749	23053749	ENST00000440481	-	ENSG00000122591	FAM126A	protein_coding	1650
chr7	23013749	23053749	ENST00000440481	-	ENSG00000122591	FAM126A	protein_coding	1650	chr7	23145353	23185353	ENST00000322231	+	ENSG00000122550	KLHL7	protein_coding	1275
chr7	23470086	23510086	ENST00000258729	-	ENSG00000136231	IGF2BP3	protein_coding	1450	chr7	23145353	23185353	ENST00000322231	+	ENSG00000122550	KLHL7	protein_coding	1275
chr7	27778992	27818992	ENST00000543117	+	ENSG00000106052	TAX1BP1	protein_coding	1775	chr7	28180362	28220362	ENST00000283928	-	ENSG00000153814	JAZF1	protein_coding	1450
chr7	30478396	30518396	ENST00000222823	-	ENSG00000106100	NOD1	protein_coding	1175	chr7	30594359	30634359	ENST00000426529	-	ENSG00000196295	AC005154.6	lincRNA	1125
chr7	30811033	30851033	ENST00000265299	+	ENSG00000106125	FAM188B	protein_coding	1025	chr7	30594359	30634359	ENST00000426529	-	ENSG00000196295	AC005154.6	lincRNA	1125
chr7	32535038	32575038	ENST00000485228	+	ENSG00000105778	AVL9	protein_coding	1425	chr7	33062409	33102409	ENST00000242210	-	ENSG00000122643	NT5C3	protein_coding	1500
chr7	33944523	33984523	ENST00000297161	+	ENSG00000164619	BMPER	protein_coding	1225	chr7	33062409	33102409	ENST00000242210	-	ENSG00000122643	NT5C3	protein_coding	1500
chr7	35037653	35077653	ENST00000310974	-	ENSG00000173852	DPY19L1	protein_coding	1525	chr7	35694745	35734745	ENST00000396081	-	ENSG00000122557	HERPUD2	protein_coding	1575
chr7	36429415	36469415	ENST00000265748	+	ENSG00000011426	ANLN	protein_coding	1400	chr7	35694745	35734745	ENST00000396081	-	ENSG00000122557	HERPUD2	protein_coding	1575
chr7	38217824	38257824	ENST00000009041	+	ENSG00000010270	STARD3NL	protein_coding	1450	chr7	38908829	38948829	ENST00000310301	-	ENSG00000006715	VPS41	protein_coding	1150
chr7	39663082	39703082	ENST00000005257	+	ENSG00000006451	RALA	protein_coding	1400	chr7	39773231	39813231	ENST00000340510	+	ENSG00000188185	LINC00265	lincRNA	1475
chr7	39989636	40029636	ENST00000181839	+	ENSG00000065883	CDK13	protein_coding	1175	chr7	39773231	39813231	ENST00000340510	+	ENSG00000188185	LINC00265	lincRNA	1475
chr7	42236658	42276658	ENST00000437480	-	ENSG00000106571	GLI3	protein_coding	725	chr7	43622664	43662664	ENST00000319357	+	ENSG00000164543	STK17A	protein_coding	1225
chr7	43622664	43662664	ENST00000319357	+	ENSG00000164543	STK17A	protein_coding	1225	chr7	43729316	43769316	ENST00000438444	-	ENSG00000106603	C7orf44	protein_coding	1175
chr7	44646171	44686171	ENST00000439616	+	ENSG00000105953	OGDH	protein_coding	975	chr7	43729316	43769316	ENST00000438444	-	ENSG00000106603	C7orf44	protein_coding	1175
chr7	47582156	47622156	ENST00000457718	-	ENSG00000136205	TNS3	protein_coding	1050	chr7	44646171	44686171	ENST00000439616	+	ENSG00000105953	OGDH	protein_coding	975
chr7	55086714	55126714	ENST00000455089	+	ENSG00000146648	EGFR	protein_coding	900	chr7	55433141	55473141	ENST00000254770	+	ENSG00000132434	LANCL2	protein_coding	1150
chr7	63983484	64023484	ENST00000309683	-	ENSG00000173041	ZNF680	protein_coding	550	chr7	65670186	65710186	ENST00000304842	+	ENSG00000169902	TPST1	protein_coding	1575
chr7	65670186	65710186	ENST00000304842	+	ENSG00000169902	TPST1	protein_coding	1575	chr7	66093945	66133945	ENST00000503687	+	ENSG00000243335	KCTD7	protein_coding	650
chr7	72896608	72936608	ENST00000404251	-	ENSG00000009954	BAZ1B	protein_coding	1175	chr7	73703805	73743805	ENST00000361545	+	ENSG00000106665	CLIP2	protein_coding	1200
chr7	73703805	73743805	ENST00000361545	+	ENSG00000106665	CLIP2	protein_coding	1200	chr7	73868120	73908120	ENST00000265755	+	ENSG00000006704	GTF2IRD1	protein_coding	1350
chr7	75328265	75368265	ENST00000336926	-	ENSG00000127946	HIP1	protein_coding	1175	chr7	73868120	73908120	ENST00000265755	+	ENSG00000006704	GTF2IRD1	protein_coding	1350
chr7	77166592	77206592	ENST00000248594	+	ENSG00000127947	PTPN12	protein_coding	1375	chr7	75328265	75368265	ENST00000336926	-	ENSG00000127946	HIP1	protein_coding	1175
chr7	79042890	79082890	ENST00000354212	-	ENSG00000187391	MAGI2	protein_coding	1575	chr7	79763814	79803814	ENST00000490206	+	ENSG00000127955	GNAI1	protein_coding	1775
chr7	82033114	82073114	ENST00000356860	-	ENSG00000153956	CACNA2D1	protein_coding	1525	chr7	79763814	79803814	ENST00000490206	+	ENSG00000127955	GNAI1	protein_coding	1775
chr7	84776171	84816171	ENST00000444867	-	ENSG00000153993	SEMA3D	protein_coding	1300	chr7	86781677	86821677	ENST00000331242	+	ENSG00000135164	DMTF1	protein_coding	1525
chr7	89975990	90015990	ENST00000222511	+	ENSG00000105793	GTPBP10	protein_coding	1275	chr7	90032748	90072748	ENST00000480135	+	ENSG00000157224	CLDN12	protein_coding	1250
chr7	90225811	90265811	ENST00000380050	+	ENSG00000058091	CDK14	protein_coding	1450	chr7	90032748	90072748	ENST00000480135	+	ENSG00000157224	CLDN12	protein_coding	1250
chr7	91470004	91510004	ENST00000454222	-	ENSG00000242870	CTB-104F4.2	processed_transcript	1250	chr7	91570181	91610181	ENST00000356239	+	ENSG00000127914	AKAP9	protein_coding	1475
chr7	91835414	91875414	ENST00000340022	-	ENSG00000001631	KRIT1	protein_coding	1175	chr7	91875548	91915548	ENST00000265742	+	ENSG00000001629	ANKIB1	protein_coding	1275
chr7	94245521	94285521	ENST00000265735	-	ENSG00000127990	SGCE	protein_coding	1450	chr7	96299173	96339173	ENST00000417009	-	ENSG00000127922	SHFM1	protein_coding	1525
chr7	96299173	96339173	ENST00000417009	-	ENSG00000127922	SHFM1	protein_coding	1525	chr7	97736197	97776197	ENST00000297293	+	ENSG00000164715	LMTK2	protein_coding	1200
chr7	97736197	97776197	ENST00000297293	+	ENSG00000164715	LMTK2	protein_coding	1200	chr7	98701723	98741723	ENST00000361125	-	ENSG00000198742	SMURF1	protein_coding	1575
chr7	98701723	98741723	ENST00000361125	-	ENSG00000198742	SMURF1	protein_coding	1575	chr7	98923521	98963521	ENST00000432884	+	ENSG00000241685	ARPC1A	protein_coding	1525
chr7	99156291	99196291	ENST00000486324	+	ENSG00000197343	ZNF655	protein_coding	1525	chr7	98923521	98963521	ENST00000432884	+	ENSG00000241685	ARPC1A	protein_coding	1525
chr7	99476728	99516728	ENST00000447480	-	ENSG00000146833	TRIM4	protein_coding	1225	chr7	99156291	99196291	ENST00000486324	+	ENSG00000197343	ZNF655	protein_coding	1525
chr7	102750007	102790007	ENST00000427257	-	ENSG00000161048	NAPEPLD	protein_coding	850	chr7	103808495	103848495	ENST00000297431	-	ENSG00000164815	ORC5	protein_coding	1400
chr7	103808495	103848495	ENST00000297431	-	ENSG00000164815	ORC5	protein_coding	1400	chr7	104654626	104694626	ENST00000311117	+	ENSG00000005483	MLL5	protein_coding	1675
chr7	104654626	104694626	ENST00000311117	+	ENSG00000005483	MLL5	protein_coding	1675	chr7	105122714	105162714	ENST00000481939	-	ENSG00000091127	PUS7	protein_coding	725
chr7	105122714	105162714	ENST00000481939	-	ENSG00000091127	PUS7	protein_coding	725	chr7	105477050	105517050	ENST00000419735	-	ENSG00000146776	ATXN7L1	protein_coding	1000
chr7	105477050	105517050	ENST00000419735	-	ENSG00000146776	ATXN7L1	protein_coding	1000	chr7	105517267	105557267	ENST00000470188	+	ENSG00000128536	CDHR3	protein_coding	700
chr7	107220422	107260422	ENST00000005259	+	ENSG00000075790	BCAP29	protein_coding	1350	chr7	107531609	107571609	ENST00000417551	+	ENSG00000091140	DLD	protein_coding	1375
chr7	108170110	108210110	ENST00000489738	-	ENSG00000135241	PNPLA8	protein_coding	1200	chr7	107531609	107571609	ENST00000417551	+	ENSG00000091140	DLD	protein_coding	1375
chr7	111846643	111886643	ENST00000361822	+	ENSG00000198839	ZNF277	protein_coding	1300	chr7	112539971	112579971	ENST00000297145	-	ENSG00000164603	C7orf60	protein_coding	1450
chr7	114562209	114602209	ENST00000393486	+	ENSG00000135272	MDFIC	protein_coding	1475	chr7	115850547	115890547	ENST00000358204	+	ENSG00000135269	TES	protein_coding	1650
chr7	115850547	115890547	ENST00000358204	+	ENSG00000135269	TES	protein_coding	1650	chr7	116312446	116352446	ENST00000397752	+	ENSG00000105976	MET	protein_coding	1300
chr7	116312446	116352446	ENST00000397752	+	ENSG00000105976	MET	protein_coding	1300	chr7	116502527	116542527	ENST00000361183	+	ENSG00000198898	CAPZA2	protein_coding	1575
chr7	120996388	121036388	ENST00000359943	-	ENSG00000196937	FAM3C	protein_coding	1375	chr7	123349121	123389121	ENST00000223023	-	ENSG00000106299	WASL	protein_coding	1600
chr7	123349121	123389121	ENST00000223023	-	ENSG00000106299	WASL	protein_coding	1600	chr7	124530037	124570037	ENST00000393329	-	ENSG00000128513	POT1	protein_coding	1575
chr7	128655198	128695198	ENST00000471234	-	ENSG00000064419	TNPO3	protein_coding	1475	chr7	129251555	129291555	ENST00000353868	+	ENSG00000106459	NRF1	protein_coding	1400
chr7	129251555	129291555	ENST00000353868	+	ENSG00000106459	NRF1	protein_coding	1400	chr7	129552789	129592789	ENST00000355621	-	ENSG00000186591	UBE2H	protein_coding	1375
chr7	129552789	129592789	ENST00000355621	-	ENSG00000186591	UBE2H	protein_coding	1375	chr7	129710350	129750350	ENST00000335420	+	ENSG00000128607	KLHDC10	protein_coding	1725
chr7	129710350	129750350	ENST00000335420	+	ENSG00000128607	KLHDC10	protein_coding	1725	chr7	129805338	129845338	ENST00000397622	-	ENSG00000146842	TMEM209	protein_coding	1100
chr7	131012605	131052605	ENST00000446815	+	ENSG00000128585	MKLN1	protein_coding	1675	chr7	129805338	129845338	ENST00000397622	-	ENSG00000146842	TMEM209	protein_coding	1100
chr7	132726848	132766848	ENST00000457942	-	ENSG00000106554	CHCHD3	protein_coding	1775	chr7	132937829	132977829	ENST00000253861	+	ENSG00000131558	EXOC4	protein_coding	1275
chr7	134464164	134504164	ENST00000361388	+	ENSG00000122786	CALD1	protein_coding	1300	chr7	135154875	135194875	ENST00000541284	-	ENSG00000080802	CNOT4	protein_coding	1625
chr7	135154875	135194875	ENST00000541284	-	ENSG00000080802	CNOT4	protein_coding	1625	chr7	135242667	135282667	ENST00000285968	+	ENSG00000155561	NUP205	protein_coding	1275
chr7	135622101	135662101	ENST00000435723	-	ENSG00000105887	MTPN	protein_coding	1500	chr7	135242667	135282667	ENST00000285968	+	ENSG00000155561	NUP205	protein_coding	1275
chr7	137646813	137686813	ENST00000456390	-	ENSG00000182158	CREB3L2	protein_coding	1625	chr7	138144953	138184953	ENST00000439939	+	ENSG00000122779	TRIM24	protein_coding	1275
chr7	138144953	138184953	ENST00000439939	+	ENSG00000122779	TRIM24	protein_coding	1275	chr7	138564221	138604221	ENST00000242365	-	ENSG00000122778	KIAA1549	protein_coding	225
chr7	138564221	138604221	ENST00000242365	-	ENSG00000122778	KIAA1549	protein_coding	225	chr7	138626064	138666064	ENST00000440172	-	ENSG00000122778	KIAA1549	protein_coding	1225
chr7	138754465	138794465	ENST00000471652	-	ENSG00000105939	ZC3HAV1	protein_coding	1575	chr7	138626064	138666064	ENST00000440172	-	ENSG00000122778	KIAA1549	protein_coding	1225
chr7	138916231	138956231	ENST00000473989	+	ENSG00000157741	UBN2	protein_coding	1325	chr7	139044627	139084627	ENST00000545899	+	ENSG00000146963	LUC7L2	protein_coding	1500
chr7	139437577	139477577	ENST00000428878	-	ENSG00000064393	HIPK2	protein_coding	1550	chr7	139044627	139084627	ENST00000545899	+	ENSG00000146963	LUC7L2	protein_coding	1500
chr7	140584564	140624564	ENST00000288602	-	ENSG00000157764	BRAF	protein_coding	1675	chr7	141250989	141290989	ENST00000355413	+	ENSG00000006530	AGK	protein_coding	1450
chr7	141250989	141290989	ENST00000355413	+	ENSG00000006530	AGK	protein_coding	1450	chr7	141438200	141478200	ENST00000465582	+	ENSG00000106028	SSBP1	protein_coding	1250
chr7	143559248	143599248	ENST00000479870	-	ENSG00000198420	FAM115A	protein_coding	2750	chr7	141438200	141478200	ENST00000465582	+	ENSG00000106028	SSBP1	protein_coding	1250
chr7	148395006	148435006	ENST00000409469	+	ENSG00000055130	CUL1	protein_coding	1575	chr7	148541413	148581413	ENST00000483012	-	ENSG00000106462	EZH2	protein_coding	1700
chr7	149281843	149321843	ENST00000472212	-	ENSG00000133624	ZNF767	pseudogene	900	chr7	148541413	148581413	ENST00000483012	-	ENSG00000106462	EZH2	protein_coding	1700
chr7	150782954	150822954	ENST00000463381	+	ENSG00000133612	AGAP3	protein_coding	1275	chr7	151290251	151330251	ENST00000476632	-	ENSG00000106617	PRKAG2	protein_coding	1175
chr7	152093090	152133090	ENST00000262189	-	ENSG00000055609	MLL3	protein_coding	1775	chr7	151290251	151330251	ENST00000476632	-	ENSG00000106617	PRKAG2	protein_coding	1175
chr7	154754794	154794794	ENST00000404141	-	ENSG00000157212	PAXIP1	protein_coding	1600	chr7	156645924	156685924	ENST00000353442	-	ENSG00000105983	LMBR1	protein_coding	1275
chr7	156645924	156685924	ENST00000353442	-	ENSG00000105983	LMBR1	protein_coding	1275	chr7	156931607	156971607	ENST00000348165	+	ENSG00000009335	UBE3C	protein_coding	1650
chr7	158582319	158622319	ENST00000251527	-	ENSG00000117868	ESYT2	protein_coding	1525	chr7	158649269	158689269	ENST00000407559	+	ENSG00000126870	WDR60	protein_coding	850
chr8	455781	495781	ENST00000523656	-	ENSG00000180190	C8orf42	protein_coding	900	chr8	6264113	6304113	ENST00000344683	+	ENSG00000147316	MCPH1	protein_coding	1600
chr8	6264113	6304113	ENST00000344683	+	ENSG00000147316	MCPH1	protein_coding	1600	chr8	6565878	6605878	ENST00000285518	+	ENSG00000155189	AGPAT5	protein_coding	1300
chr8	8204008	8244008	ENST00000520004	-	ENSG00000182319	PRAGMIN	protein_coding	825	chr8	8711155	8751155	ENST00000276282	-	ENSG00000147324	MFHAS1	protein_coding	950
chr8	9413424	9453424	ENST00000520408	+	ENSG00000173273	TNKS	protein_coding	1550	chr8	9472800	9512800	ENST00000518027	+	ENSG00000173273	TNKS	protein_coding	650
chr8	9911778	9951778	ENST00000317173	+	ENSG00000175806	MSRA	protein_coding	1175	chr8	9472800	9512800	ENST00000518027	+	ENSG00000173273	TNKS	protein_coding	650
chr8	11018875	11058875	ENST00000416569	-	ENSG00000171044	XKR6	protein_coding	1250	chr8	11141925	11181925	ENST00000221086	+	ENSG00000104643	MTMR9	protein_coding	1725
chr8	11653082	11693082	ENST00000538689	+	ENSG00000079459	FDFT1	protein_coding	1925	chr8	11141925	11181925	ENST00000221086	+	ENSG00000104643	MTMR9	protein_coding	1725
chr8	16884747	16924747	ENST00000318063	+	ENSG00000155970	EFHA2	protein_coding	1550	chr8	18831970	18871970	ENST00000521841	-	ENSG00000156011	PSD3	protein_coding	1350
chr8	18831970	18871970	ENST00000521841	-	ENSG00000156011	PSD3	protein_coding	1350	chr8	19171128	19211128	ENST00000265807	+	ENSG00000104611	SH2D4A	protein_coding	1300
chr8	20121474	20161474	ENST00000381569	-	ENSG00000061337	LZTS1	protein_coding	725	chr8	19171128	19211128	ENST00000265807	+	ENSG00000104611	SH2D4A	protein_coding	1300
chr8	21777180	21817180	ENST00000434536	+	ENSG00000130227	XPO7	protein_coding	1050	chr8	22022249	22062249	ENST00000306385	+	ENSG00000168487	BMP1	protein_coding	875
chr8	22486638	22526638	ENST00000522687	-	ENSG00000147439	BIN3	protein_coding	1300	chr8	22022249	22062249	ENST00000306385	+	ENSG00000168487	BMP1	protein_coding	875
chr8	23221753	23261753	ENST00000389131	-	ENSG00000134013	LOXL2	protein_coding	1550	chr8	23386318	23426318	ENST00000519973	+	ENSG00000147454	SLC25A37	protein_coding	775
chr8	25042238	25082238	ENST00000410074	+	ENSG00000147459	DOCK5	protein_coding	1625	chr8	25316513	25356513	ENST00000330560	+	ENSG00000184661	CDCA2	protein_coding	1500
chr8	26149007	26189007	ENST00000380737	+	ENSG00000221914	PPP2R2A	protein_coding	1425	chr8	26240713	26280713	ENST00000523949	+	ENSG00000104765	BNIP3L	protein_coding	1200
chr8	26435359	26475359	ENST00000311151	+	ENSG00000092964	DPYSL2	protein_coding	675	chr8	26240713	26280713	ENST00000523949	+	ENSG00000104765	BNIP3L	protein_coding	1200
chr8	27491385	27531385	ENST00000337221	+	ENSG00000168077	SCARA3	protein_coding	1175	chr8	28203983	28243983	ENST00000344423	-	ENSG00000186918	ZNF395	protein_coding	1350
chr8	28203983	28243983	ENST00000344423	-	ENSG00000186918	ZNF395	protein_coding	1350	chr8	28747911	28787911	ENST00000444075	+	ENSG00000147421	HMBOX1	protein_coding	1550
chr8	30241944	30281944	ENST00000538486	+	ENSG00000157110	RBPMS	protein_coding	1525	chr8	30475768	30515768	ENST00000355904	-	ENSG00000197265	GTF2E2	protein_coding	1525
chr8	30475768	30515768	ENST00000355904	-	ENSG00000197265	GTF2E2	protein_coding	1525	chr8	30545443	30585443	ENST00000221130	-	ENSG00000104687	GSR	protein_coding	1425
chr8	30891317	30931317	ENST00000298139	+	ENSG00000165392	WRN	protein_coding	1525	chr8	30545443	30585443	ENST00000221130	-	ENSG00000104687	GSR	protein_coding	1425
chr8	32405728	32445728	ENST00000341377	+	ENSG00000157168	NRG1	protein_coding	1625	chr8	30891317	30931317	ENST00000298139	+	ENSG00000165392	WRN	protein_coding	1525
chr8	37654424	37694424	ENST00000315215	+	ENSG00000020181	GPR124	protein_coding	950	chr8	38199790	38239790	ENST00000316985	-	ENSG00000147548	WHSC1L1	protein_coding	1775
chr8	38199790	38239790	ENST00000316985	-	ENSG00000147548	WHSC1L1	protein_coding	1775	chr8	38286352	38326352	ENST00000341462	-	ENSG00000077782	FGFR1	protein_coding	1500
chr8	38758753	38798753	ENST00000420274	+	ENSG00000169499	PLEKHA2	protein_coding	1750	chr8	38854505	38894505	ENST00000487273	+	ENSG00000168615	ADAM9	protein_coding	1550
chr8	41869505	41909505	ENST00000396930	-	ENSG00000083168	KAT6A	protein_coding	1775	chr8	42128820	42168820	ENST00000520810	+	ENSG00000104365	IKBKB	protein_coding	1250
chr8	42128820	42168820	ENST00000520810	+	ENSG00000104365	IKBKB	protein_coding	1250	chr8	42357069	42397069	ENST00000342228	-	ENSG00000168575	SLC20A2	protein_coding	1250
chr8	42752075	42792075	ENST00000307602	+	ENSG00000168172	HOOK3	protein_coding	1425	chr8	42357069	42397069	ENST00000342228	-	ENSG00000168575	SLC20A2	protein_coding	1250
chr8	48173167	48213167	ENST00000297423	+	ENSG00000164808	KIAA0146	protein_coding	1300	chr8	48832743	48872743	ENST00000338368	-	ENSG00000253729	PRKDC	protein_coding	1150
chr8	48832743	48872743	ENST00000338368	-	ENSG00000253729	PRKDC	protein_coding	1150	chr8	48920960	48960960	ENST00000523111	+	ENSG00000169139	UBE2V2	protein_coding	750
chr8	52771735	52811735	ENST00000544451	-	ENSG00000168300	PCMTD1	protein_coding	1575	chr8	53586997	53626997	ENST00000521611	-	ENSG00000023287	RB1CC1	protein_coding	1375
chr8	54716118	54756118	ENST00000355221	-	ENSG00000047249	ATP6V1H	protein_coding	1600	chr8	54792444	54832444	ENST00000518286	+	ENSG00000147509	RGS20	protein_coding	1800
chr8	54895089	54935089	ENST00000521604	-	ENSG00000187735	TCEA1	protein_coding	1750	chr8	54974577	55014577	ENST00000316963	-	ENSG00000120992	LYPLA1	protein_coding	1025
chr8	56685701	56725701	ENST00000260129	+	ENSG00000137574	TGS1	protein_coding	1525	chr8	56792372	56832372	ENST00000519728	+	ENSG00000254087	LYN	protein_coding	1450
chr8	57083859	57123859	ENST00000423799	-	ENSG00000181690	PLAG1	protein_coding	1400	chr8	56792372	56832372	ENST00000519728	+	ENSG00000254087	LYN	protein_coding	1450
chr8	57432230	57472230	ENST00000499425	-	ENSG00000246430	RP11-16M8.2	lincRNA	600	chr8	57083859	57123859	ENST00000423799	-	ENSG00000181690	PLAG1	protein_coding	1400
chr8	59323823	59363823	ENST00000399598	+	ENSG00000215114	UBXN2B	protein_coding	1075	chr8	59991767	60031767	ENST00000361421	-	ENSG00000198846	TOX	protein_coding	1425
chr8	61429416	61469416	ENST00000262646	+	ENSG00000104388	RAB2A	protein_coding	1800	chr8	62587155	62627155	ENST00000356457	-	ENSG00000198363	ASPH	protein_coding	1450
chr8	64081112	64121112	ENST00000521674	+	ENSG00000185728	YTHDF3	lincRNA	1075	chr8	62587155	62627155	ENST00000356457	-	ENSG00000198363	ASPH	protein_coding	1450
chr8	66714557	66754557	ENST00000519626	-	ENSG00000205268	PDE7A	protein_coding	1575	chr8	67485529	67525529	ENST00000517885	-	ENSG00000185697	MYBL1	protein_coding	1225
chr8	67485529	67525529	ENST00000517885	-	ENSG00000185697	MYBL1	protein_coding	1225	chr8	67579831	67619831	ENST00000520044	+	ENSG00000104205	SGK3	protein_coding	1550
chr8	67579831	67619831	ENST00000520044	+	ENSG00000104205	SGK3	protein_coding	1550	chr8	67624653	67664653	ENST00000521198	+	ENSG00000104205	SGK3	protein_coding	950
chr8	67976603	68016603	ENST00000412460	+	ENSG00000104218	CSPP1	protein_coding	1400	chr8	68215912	68255912	ENST00000519436	-	ENSG00000066777	ARFGEF1	protein_coding	1675
chr8	70378859	70418859	ENST00000525061	+	ENSG00000137573	SULF1	protein_coding	1125	chr8	68215912	68255912	ENST00000519436	-	ENSG00000066777	ARFGEF1	protein_coding	1675
chr8	79578282	79618282	ENST00000263849	+	ENSG00000104427	ZC2HC1A	protein_coding	1625	chr8	80902524	80942524	ENST00000521605	-	ENSG00000147586	MRPS28	protein_coding	975
chr8	80902524	80942524	ENST00000521605	-	ENSG00000147586	MRPS28	protein_coding	975	chr8	81397902	81437902	ENST00000430430	+	ENSG00000205189	ZBTB10	protein_coding	1525
chr8	82714539	82754539	ENST00000345957	-	ENSG00000104497	SNX16	protein_coding	1450	chr8	81397902	81437902	ENST00000430430	+	ENSG00000205189	ZBTB10	protein_coding	1525
chr8	89300254	89340254	ENST00000522726	-	ENSG00000156103	MMP16	protein_coding	1500	chr8	90729955	90769955	ENST00000519655	-	ENSG00000251136	RP11-37B2.1	lincRNA	900
chr8	90729955	90769955	ENST00000519655	-	ENSG00000251136	RP11-37B2.1	lincRNA	900	chr8	90956944	90996944	ENST00000265433	-	ENSG00000104320	NBN	protein_coding	1275
chr8	92013292	92053292	ENST00000285419	-	ENSG00000155099	TMEM55A	protein_coding	1375	chr8	90956944	90996944	ENST00000265433	-	ENSG00000104320	NBN	protein_coding	1275
chr8	95525757	95565757	ENST00000421249	-	ENSG00000164944	KIAA1429	protein_coding	1450	chr8	95835527	95875527	ENST00000523731	+	ENSG00000164941	INTS8	protein_coding	925
chr8	97273943	97313943	ENST00000517309	+	ENSG00000156471	PTDSS1	protein_coding	1500	chr8	97505579	97545579	ENST00000302190	+	ENSG00000169439	SDC2	protein_coding	1325
chr8	97505579	97545579	ENST00000302190	+	ENSG00000169439	SDC2	protein_coding	1325	chr8	97657455	97697455	ENST00000220763	+	ENSG00000104324	CPQ	protein_coding	750
chr8	98656407	98696407	ENST00000336273	+	ENSG00000147649	MTDH	protein_coding	1650	chr8	98787285	98827285	ENST00000445593	+	ENSG00000104341	LAPTM4B	protein_coding	1375
chr8	99129540	99169540	ENST00000401707	+	ENSG00000104356	POP1	protein_coding	1475	chr8	99266621	99306621	ENST00000341166	-	ENSG00000104361	NIPAL2	protein_coding	1175
chr8	99797909	99837909	ENST00000419617	-	ENSG00000104375	STK3	protein_coding	1275	chr8	100025494	100065494	ENST00000496144	+	ENSG00000132549	VPS13B	protein_coding	1250
chr8	101282555	101322555	ENST00000341084	-	ENSG00000034677	RNF19A	protein_coding	1700	chr8	101531970	101571970	ENST00000520552	-	ENSG00000186106	ANKRD46	protein_coding	1025
chr8	103385069	103425069	ENST00000520539	-	ENSG00000104517	UBR5	protein_coding	1300	chr8	104033291	104073291	ENST00000395862	+	ENSG00000155097	ATP6V1C1	protein_coding	1350
chr8	105561417	105601417	ENST00000523830	-	ENSG00000147650	LRP12	protein_coding	1600	chr8	104033291	104073291	ENST00000395862	+	ENSG00000155097	ATP6V1C1	protein_coding	1350
chr8	108470283	108510283	ENST00000297450	-	ENSG00000154188	ANGPT1	protein_coding	1475	chr8	110306614	110346614	ENST00000239690	-	ENSG00000120526	NUDCD1	protein_coding	1375
chr8	116641710	116681710	ENST00000519815	-	ENSG00000104447	TRPS1	protein_coding	1500	chr8	117778744	117818744	ENST00000521703	+	ENSG00000147679	UTP23	protein_coding	1100
chr8	119084092	119124092	ENST00000378204	-	ENSG00000182197	EXT1	protein_coding	1100	chr8	119594234	119634234	ENST00000526765	-	ENSG00000177570	SAMD12	protein_coding	1000
chr8	120805103	120845103	ENST00000378164	-	ENSG00000064313	TAF2	protein_coding	1200	chr8	121417642	121457642	ENST00000518696	-	ENSG00000172172	MRPL13	protein_coding	1550
chr8	123793633	123833633	ENST00000314393	+	ENSG00000178764	ZHX2	protein_coding	600	chr8	124368705	124408705	ENST00000287394	-	ENSG00000156802	ATAD2	protein_coding	1250
chr8	124368705	124408705	ENST00000287394	-	ENSG00000156802	ATAD2	protein_coding	1250	chr8	124429043	124469043	ENST00000523551	+	ENSG00000156795	WDYHV1	protein_coding	1275
chr8	124513446	124553446	ENST00000517956	-	ENSG00000156804	FBXO32	protein_coding	1575	chr8	124429043	124469043	ENST00000523551	+	ENSG00000156795	WDYHV1	protein_coding	1275
chr8	124780696	124820696	ENST00000521166	+	ENSG00000176853	FAM91A1	protein_coding	1575	chr8	124513446	124553446	ENST00000517956	-	ENSG00000156804	FBXO32	protein_coding	1575
chr8	125344933	125384933	ENST00000297632	-	ENSG00000164983	TMEM65	protein_coding	1825	chr8	125700730	125740730	ENST00000354184	-	ENSG00000170873	MTSS1	protein_coding	950
chr8	126064082	126104082	ENST00000318410	-	ENSG00000164961	KIAA0196	protein_coding	1250	chr8	125700730	125740730	ENST00000354184	-	ENSG00000170873	MTSS1	protein_coding	950
chr8	126103921	126143921	ENST00000523741	+	ENSG00000156831	NSMCE2	protein_coding	1200	chr8	125700730	125740730	ENST00000354184	-	ENSG00000170873	MTSS1	protein_coding	950
chr8	130912118	130952118	ENST00000519540	-	ENSG00000153310	FAM49B	protein_coding	1650	chr8	131415906	131455906	ENST00000518721	-	ENSG00000153317	ASAP1	protein_coding	1500
chr8	134544183	134584183	ENST00000319914	-	ENSG00000008513	ST3GAL1	protein_coding	950	chr8	135685292	135725292	ENST00000523243	-	ENSG00000066827	ZFAT	protein_coding	1000
chr8	135685292	135725292	ENST00000523243	-	ENSG00000066827	ZFAT	protein_coding	1000	chr8	136469700	136509700	ENST00000355849	+	ENSG00000131773	KHDRBS3	protein_coding	1475
chr8	142138720	142178720	ENST00000424248	+	ENSG00000105339	DENND3	protein_coding	1700	chr8	144583623	144623623	ENST00000262577	-	ENSG00000014164	ZC3H3	protein_coding	1050
chr8	144583623	144623623	ENST00000262577	-	ENSG00000014164	ZC3H3	protein_coding	1050	chr8	146086807	146126807	ENST00000543949	-	ENSG00000196150	ZNF250	protein_coding	800
chr9	2015342	2055342	ENST00000349721	+	ENSG00000080503	SMARCA2	protein_coding	1500	chr9	3486004	3526004	ENST00000449190	-	ENSG00000080298	RFX3	protein_coding	1125
chr9	3486004	3526004	ENST00000449190	-	ENSG00000080298	RFX3	protein_coding	1125	chr9	3526723	3566723	ENST00000423112	+	ENSG00000232104	RP11-509J21.1	lincRNA	1000
chr9	4792869	4832869	ENST00000381750	+	ENSG00000120158	RCL1	protein_coding	1100	chr9	4985086	5025086	ENST00000539801	+	ENSG00000096968	JAK2	protein_coding	1075
chr9	5510545	5550545	ENST00000397745	+	ENSG00000197646	PDCD1LG2	protein_coding	1300	chr9	4985086	5025086	ENST00000539801	+	ENSG00000096968	JAK2	protein_coding	1075
chr9	6413151	6453151	ENST00000468435	+	ENSG00000147854	UHRF2	protein_coding	1700	chr9	6757641	6797641	ENST00000543771	+	ENSG00000107077	KDM4C	protein_coding	1300
chr9	13239589	13279589	ENST00000319217	-	ENSG00000107186	MPDZ	protein_coding	1550	chr9	14653469	14693469	ENST00000380916	-	ENSG00000175893	ZDHHC21	protein_coding	725
chr9	14653469	14693469	ENST00000380916	-	ENSG00000175893	ZDHHC21	protein_coding	725	chr9	15267358	15307358	ENST00000380850	-	ENSG00000155158	TTC39B	protein_coding	750
chr9	15267358	15307358	ENST00000380850	-	ENSG00000155158	TTC39B	protein_coding	750	chr9	15422702	15462702	ENST00000380821	+	ENSG00000164975	SNAPC3	protein_coding	1250
chr9	15422702	15462702	ENST00000380821	+	ENSG00000164975	SNAPC3	protein_coding	1250	chr9	15471017	15511017	ENST00000380733	-	ENSG00000164985	PSIP1	protein_coding	1250
chr9	16830841	16870841	ENST00000486514	-	ENSG00000173068	BNC2	protein_coding	1425	chr9	15471017	15511017	ENST00000380733	-	ENSG00000164985	PSIP1	protein_coding	1250
chr9	18473892	18513892	ENST00000380548	+	ENSG00000178031	ADAMTSL1	protein_coding	1800	chr9	16830841	16870841	ENST00000486514	-	ENSG00000173068	BNC2	protein_coding	1425
chr9	20582542	20622542	ENST00000380338	-	ENSG00000171843	MLLT3	protein_coding	1550	chr9	21519668	21559668	ENST00000304425	-	ENSG00000171889	MIR31HG	lincRNA	1700
chr9	26907461	26947461	ENST00000397292	-	ENSG00000137055	PLAA	protein_coding	1650	chr9	21519668	21559668	ENST00000304425	-	ENSG00000171889	MIR31HG	lincRNA	1700
chr9	32384618	32424618	ENST00000379921	+	ENSG00000122729	ACO1	protein_coding	1400	chr9	32486322	32526322	ENST00000379882	-	ENSG00000107201	DDX58	protein_coding	1100
chr9	32985110	33025110	ENST00000495360	-	ENSG00000137074	APTX	protein_coding	625	chr9	33127354	33167354	ENST00000535206	-	ENSG00000086062	B4GALT1	protein_coding	1425
chr9	33290509	33330509	ENST00000379540	+	ENSG00000086102	NFX1	protein_coding	1050	chr9	33127354	33167354	ENST00000535206	-	ENSG00000086062	B4GALT1	protein_coding	1425
chr9	33817565	33857565	ENST00000263228	+	ENSG00000107341	UBE2R2	protein_coding	1275	chr9	34008947	34048947	ENST00000412543	-	ENSG00000137073	UBAP2	protein_coding	875
chr9	34008947	34048947	ENST00000412543	-	ENSG00000137073	UBAP2	protein_coding	875	chr9	34086771	34126771	ENST00000361264	-	ENSG00000198876	DCAF12	protein_coding	1125
chr9	34179003	34219003	ENST00000543944	+	ENSG00000165006	UBAP1	protein_coding	1625	chr9	34086771	34126771	ENST00000361264	-	ENSG00000198876	DCAF12	protein_coding	1125
chr9	34418568	34458568	ENST00000445726	-	ENSG00000164970	FAM219A	protein_coding	1225	chr9	34179003	34219003	ENST00000543944	+	ENSG00000165006	UBAP1	protein_coding	1625
chr9	35490124	35530124	ENST00000361226	+	ENSG00000198853	RUSC2	protein_coding	1275	chr9	36036430	36076430	ENST00000377966	+	ENSG00000122707	RECK	protein_coding	1700
chr9	36036430	36076430	ENST00000377966	+	ENSG00000122707	RECK	protein_coding	1700	chr9	36190928	36230928	ENST00000464497	+	ENSG00000122705	CLTA	protein_coding	1425
chr9	36218496	36258496	ENST00000377902	-	ENSG00000159921	GNE	protein_coding	1125	chr9	36361195	36401195	ENST00000377885	-	ENSG00000137075	RNF38	protein_coding	1250
chr9	36361195	36401195	ENST00000377885	-	ENSG00000137075	RNF38	protein_coding	1250	chr9	36447545	36487545	ENST00000488058	-	ENSG00000137075	RNF38	protein_coding	1750
chr9	36572859	36612859	ENST00000298048	+	ENSG00000165304	MELK	protein_coding	1125	chr9	36447545	36487545	ENST00000488058	-	ENSG00000137075	RNF38	protein_coding	1750
chr9	37120536	37160536	ENST00000336755	+	ENSG00000147905	ZCCHC7	protein_coding	1000	chr9	37552466	37592466	ENST00000537239	-	ENSG00000256966	RP11-613M10.8	protein_coding	1000
chr9	37552466	37592466	ENST00000537239	-	ENSG00000256966	RP11-613M10.8	protein_coding	1000	chr9	37800499	37840499	ENST00000377724	+	ENSG00000122741	DCAF10	protein_coding	1375
chr9	71650479	71690479	ENST00000396364	+	ENSG00000165060	FXN	protein_coding	850	chr9	72334858	72374858	ENST00000340434	-	ENSG00000188647	PTAR1	protein_coding	1375
chr9	72334858	72374858	ENST00000340434	-	ENSG00000188647	PTAR1	protein_coding	1375	chr9	72658497	72698497	ENST00000377182	+	ENSG00000165072	MAMDC2	protein_coding	875
chr9	72658497	72698497	ENST00000377182	+	ENSG00000165072	MAMDC2	protein_coding	875	chr9	72873937	72913937	ENST00000361138	+	ENSG00000198887	SMC5	protein_coding	1400
chr9	74343800	74383800	ENST00000377044	-	ENSG00000135048	TMEM2	protein_coding	1475	chr9	74485847	74525847	ENST00000377041	-	ENSG00000107362	FAM108B1	protein_coding	1525
chr9	74485847	74525847	ENST00000377041	-	ENSG00000107362	FAM108B1	protein_coding	1525	chr9	74526426	74566426	ENST00000479413	+	ENSG00000155621	C9orf85	protein_coding	1625
chr9	77603310	77643310	ENST00000376834	-	ENSG00000156017	C9orf41	protein_coding	1325	chr9	77703459	77743459	ENST00000346234	+	ENSG00000134996	OSTF1	protein_coding	1150
chr9	79074068	79114068	ENST00000444201	+	ENSG00000187210	GCNT1	protein_coding	1000	chr9	79792269	79832269	ENST00000376634	+	ENSG00000197969	VPS13A	protein_coding	1025
chr9	80606374	80646374	ENST00000286548	-	ENSG00000156052	GNAQ	protein_coding	1300	chr9	79792269	79832269	ENST00000376634	+	ENSG00000197969	VPS13A	protein_coding	1025
chr9	82186688	82226688	ENST00000376552	+	ENSG00000106829	TLE4	protein_coding	1525	chr9	80606374	80646374	ENST00000286548	-	ENSG00000156052	GNAQ	protein_coding	1300
chr9	88556061	88596061	ENST00000361671	+	ENSG00000135040	NAA35	protein_coding	1425	chr9	88929369	88969369	ENST00000375960	-	ENSG00000083223	ZCCHC6	protein_coding	1075
chr9	91003334	91043334	ENST00000375859	+	ENSG00000106723	SPIN1	protein_coding	1475	chr9	88929369	88969369	ENST00000375960	-	ENSG00000083223	ZCCHC6	protein_coding	1075
chr9	94084195	94124195	ENST00000375731	-	ENSG00000148090	AUH	protein_coding	1000	chr9	94837690	94877690	ENST00000486910	-	ENSG00000090054	SPTLC1	protein_coding	775
chr9	94837690	94877690	ENST00000486910	-	ENSG00000090054	SPTLC1	protein_coding	775	chr9	95016038	95056038	ENST00000443024	-	ENSG00000196305	IARS	protein_coding	950
chr9	95392547	95432547	ENST00000287996	-	ENSG00000127080	IPPK	protein_coding	1225	chr9	95487094	95527094	ENST00000375512	-	ENSG00000185963	BICD2	protein_coding	1625
chr9	96214173	96254173	ENST00000375389	+	ENSG00000048828	FAM120A	protein_coding	1675	chr9	95487094	95527094	ENST00000375512	-	ENSG00000185963	BICD2	protein_coding	1625
chr9	97488983	97528983	ENST00000277198	+	ENSG00000148120	C9orf3	protein_coding	1000	chr9	97766199	97806199	ENST00000478603	+	ENSG00000148120	C9orf3	protein_coding	1225
chr9	97766199	97806199	ENST00000478603	+	ENSG00000148120	C9orf3	protein_coding	1225	chr9	98039991	98079991	ENST00000474949	-	ENSG00000158169	FANCC	protein_coding	1275
chr9	99212483	99252483	ENST00000375251	+	ENSG00000130956	HABP4	protein_coding	1175	chr9	99342112	99382112	ENST00000265659	-	ENSG00000081377	CDC14B	protein_coding	1450
chr9	100174232	100214232	ENST00000355295	+	ENSG00000196116	TDRD7	protein_coding	900	chr9	100395908	100435908	ENST00000375147	+	ENSG00000136937	NCBP1	protein_coding	1300
chr9	100977915	101017915	ENST00000375066	-	ENSG00000095383	TBC1D2	protein_coding	1025	chr9	101519247	101559247	ENST00000375019	-	ENSG00000165138	ANKS6	protein_coding	975
chr9	102542171	102582171	ENST00000427039	-	ENSG00000237461	RP11-554F20.1	lincRNA	1025	chr9	102821322	102861322	ENST00000262455	-	ENSG00000023318	ERP44	protein_coding	1475
chr9	102821322	102861322	ENST00000262455	-	ENSG00000023318	ERP44	protein_coding	1475	chr9	103075221	103115221	ENST00000374902	-	ENSG00000136891	TEX10	protein_coding	1625
chr9	106856541	106896541	ENST00000286398	+	ENSG00000136824	SMC2	protein_coding	1025	chr9	107650518	107690518	ENST00000374736	-	ENSG00000165029	ABCA1	protein_coding	1000
chr9	107650518	107690518	ENST00000374736	-	ENSG00000165029	ABCA1	protein_coding	1000	chr9	108006903	108046903	ENST00000374720	+	ENSG00000070214	SLC44A1	protein_coding	1150
chr9	108006903	108046903	ENST00000374720	+	ENSG00000070214	SLC44A1	protein_coding	1150	chr9	108210077	108250077	ENST00000495708	+	ENSG00000106701	FSD1L	protein_coding	1200
chr9	108456825	108496825	ENST00000374692	+	ENSG00000095209	TMEM38B	protein_coding	850	chr9	108210077	108250077	ENST00000495708	+	ENSG00000106701	FSD1L	protein_coding	1200
chr9	109689545	109729545	ENST00000374686	+	ENSG00000148143	ZNF462	protein_coding	300	chr9	110045560	110085560	ENST00000358015	+	ENSG00000119318	RAD23B	protein_coding	1650
chr9	111842225	111882225	ENST00000374586	-	ENSG00000106771	TMEM245	protein_coding	1525	chr9	113302160	113342160	ENST00000401783	-	ENSG00000165124	SVEP1	protein_coding	1625
chr9	113302160	113342160	ENST00000401783	-	ENSG00000165124	SVEP1	protein_coding	1625	chr9	113760981	113800981	ENST00000538760	-	ENSG00000198121	LPAR1	protein_coding	1150
chr9	113760981	113800981	ENST00000538760	-	ENSG00000198121	LPAR1	protein_coding	1150	chr9	114207025	114247025	ENST00000259335	-	ENSG00000136813	KIAA0368	protein_coding	1675
chr9	115055947	115095947	ENST00000374257	-	ENSG00000119314	PTBP3	protein_coding	1300	chr9	115513118	115553118	ENST00000374232	+	ENSG00000148158	SNX30	protein_coding	1125
chr9	115513118	115553118	ENST00000374232	+	ENSG00000148158	SNX30	protein_coding	1125	chr9	115943641	115983641	ENST00000238256	-	ENSG00000119321	FKBP15	protein_coding	1250
chr9	115943641	115983641	ENST00000238256	-	ENSG00000119321	FKBP15	protein_coding	1250	chr9	115983842	116023842	ENST00000374212	+	ENSG00000136868	SLC31A1	protein_coding	1125
chr9	116638562	116678562	ENST00000288466	+	ENSG00000157657	ZNF618	protein_coding	1275	chr9	116917840	116957840	ENST00000356083	+	ENSG00000196739	COL27A1	protein_coding	1050
chr9	117227250	117267250	ENST00000362057	-	ENSG00000095397	DFNB31	protein_coding	950	chr9	116917840	116957840	ENST00000356083	+	ENSG00000196739	COL27A1	protein_coding	1050
chr9	117840536	117880536	ENST00000350763	-	ENSG00000041982	TNC	protein_coding	1475	chr9	117227250	117267250	ENST00000362057	-	ENSG00000095397	DFNB31	protein_coding	950
chr9	118916083	118956083	ENST00000328252	+	ENSG00000182752	PAPPA	protein_coding	1075	chr9	117840536	117880536	ENST00000350763	-	ENSG00000041982	TNC	protein_coding	1475
chr9	123302437	123342437	ENST00000359309	-	ENSG00000136861	CDK5RAP2	protein_coding	1175	chr9	123436748	123476748	ENST00000373930	-	ENSG00000106780	MEGF9	protein_coding	1200
chr9	124030338	124070338	ENST00000449773	+	ENSG00000148180	GSN	protein_coding	1375	chr9	123436748	123476748	ENST00000373930	-	ENSG00000106780	MEGF9	protein_coding	1200
chr9	124815885	124855885	ENST00000321582	-	ENSG00000175764	TTLL11	protein_coding	1350	chr9	125026882	125066882	ENST00000297908	+	ENSG00000148187	MRRF	protein_coding	1000
chr9	126652431	126692431	ENST00000373618	-	ENSG00000119522	DENND1A	protein_coding	1350	chr9	127019885	127059885	ENST00000373603	+	ENSG00000119408	NEK6	protein_coding	1175
chr9	127019885	127059885	ENST00000373603	+	ENSG00000119408	NEK6	protein_coding	1175	chr9	127137721	127177721	ENST00000536392	-	ENSG00000136930	PSMB7	protein_coding	1450
chr9	127912218	127952218	ENST00000415905	-	ENSG00000119414	PPP6C	protein_coding	1325	chr9	128024073	128064073	ENST00000497580	+	ENSG00000165219	GAPVD1	protein_coding	1650
chr9	128429513	128469513	ENST00000265960	-	ENSG00000119487	MAPKAP1	protein_coding	1075	chr9	128509624	128549624	ENST00000342287	+	ENSG00000167081	PBX3	protein_coding	1650
chr9	129089128	129129128	ENST00000361171	+	ENSG00000196814	FAM125B	protein_coding	1700	chr9	128509624	128549624	ENST00000342287	+	ENSG00000167081	PBX3	protein_coding	1650
chr9	131218408	131258408	ENST00000351030	+	ENSG00000136811	ODF2	protein_coding	600	chr9	131314866	131354866	ENST00000358161	+	ENSG00000197694	SPTAN1	protein_coding	1350
chr9	131709978	131749978	ENST00000372577	+	ENSG00000095319	NUP188	protein_coding	600	chr9	131314866	131354866	ENST00000358161	+	ENSG00000197694	SPTAN1	protein_coding	1350
chr9	132427920	132467920	ENST00000372469	+	ENSG00000167157	PRRX2	protein_coding	1425	chr9	132597725	132637725	ENST00000372429	+	ENSG00000136878	USP20	protein_coding	700
chr9	132815705	132855705	ENST00000347136	+	ENSG00000148358	GPR107	protein_coding	1525	chr9	132597725	132637725	ENST00000372429	+	ENSG00000136878	USP20	protein_coding	700
chr9	133454993	133494993	ENST00000319725	+	ENSG00000107164	FUBP3	protein_coding	1450	chr9	133589333	133629333	ENST00000372348	+	ENSG00000097007	ABL1	protein_coding	775
chr9	133589333	133629333	ENST00000372348	+	ENSG00000097007	ABL1	protein_coding	775	chr9	133710453	133750453	ENST00000318560	+	ENSG00000097007	ABL1	protein_coding	1225
chr9	134000948	134040948	ENST00000359428	+	ENSG00000126883	NUP214	protein_coding	1325	chr9	134269480	134309480	ENST00000405995	+	ENSG00000130723	PRRC2B	protein_coding	1475
chr9	134575461	134615461	ENST00000372195	-	ENSG00000107263	RAPGEF1	protein_coding	1325	chr9	134269480	134309480	ENST00000405995	+	ENSG00000130723	PRRC2B	protein_coding	1475
chr9	134915295	134955295	ENST00000292035	-	ENSG00000160563	MED27	protein_coding	1300	chr9	134575461	134615461	ENST00000372195	-	ENSG00000107263	RAPGEF1	protein_coding	1325
chr9	135505788	135545788	ENST00000372153	-	ENSG00000125485	DDX31	protein_coding	1425	chr9	134915295	134955295	ENST00000292035	-	ENSG00000160563	MED27	protein_coding	1300
chr9	136817726	136857726	ENST00000371851	-	ENSG00000160293	VAV2	protein_coding	1000	chr9	137218426	137258426	ENST00000481739	+	ENSG00000186350	RXRA	protein_coding	1225
chr9	137218426	137258426	ENST00000481739	+	ENSG00000186350	RXRA	protein_coding	1225	chr9	137533620	137573620	ENST00000371817	+	ENSG00000130635	COL5A1	protein_coding	1100
chr9	138759074	138799074	ENST00000409386	-	ENSG00000130559	CAMSAP1	protein_coding	1250	chr9	138947131	138987131	ENST00000277554	-	ENSG00000148411	NACC2	protein_coding	875
chr9	140513444	140553444	ENST00000462484	+	ENSG00000181090	EHMT1	protein_coding	1575	chr9	138947131	138987131	ENST00000277554	-	ENSG00000148411	NACC2	protein_coding	875
chrX	7026231	7066231	ENST00000540122	-	ENSG00000130021	HDHD1	protein_coding	1025	chrX	9983602	10023602	ENST00000380861	+	ENSG00000047644	WWC3	protein_coding	800
chrX	9983602	10023602	ENST00000380861	+	ENSG00000047644	WWC3	protein_coding	800	chrX	10504995	10544995	ENST00000380779	-	ENSG00000101871	MID1	protein_coding	1425
chrX	10504995	10544995	ENST00000380779	-	ENSG00000101871	MID1	protein_coding	1425	chrX	10548674	10588674	ENST00000317552	-	ENSG00000101871	MID1	protein_coding	1400
chrX	14891563	14931563	ENST00000380492	+	ENSG00000130150	MOSPD2	protein_coding	1250	chrX	16737755	16777755	ENST00000380155	+	ENSG00000169895	SYAP1	protein_coding	1150
chrX	16737755	16777755	ENST00000380155	+	ENSG00000169895	SYAP1	protein_coding	1150	chrX	16804550	16844550	ENST00000380122	+	ENSG00000086712	TXLNG	protein_coding	1175
chrX	20245523	20285523	ENST00000544447	-	ENSG00000177189	RPS6KA3	protein_coding	1350	chrX	21958691	21998691	ENST00000404933	+	ENSG00000102172	SMS	protein_coding	1575
chrX	23721390	23761390	ENST00000379303	-	ENSG00000123130	ACOT9	protein_coding	1300	chrX	24005303	24045303	ENST00000328046	-	ENSG00000174010	KLHL15	protein_coding	1700
chrX	24005303	24045303	ENST00000328046	-	ENSG00000174010	KLHL15	protein_coding	1700	chrX	24167762	24207762	ENST00000539115	+	ENSG00000005889	ZFX	protein_coding	1925
chrX	39916656	39956656	ENST00000397354	-	ENSG00000183337	BCOR	protein_coding	1350	chrX	40554783	40594783	ENST00000324817	-	ENSG00000180182	MED14	protein_coding	1250
chrX	40554783	40594783	ENST00000324817	-	ENSG00000180182	MED14	protein_coding	1250	chrX	40944888	40984888	ENST00000378308	+	ENSG00000124486	USP9X	protein_coding	1500
chrX	41742716	41782716	ENST00000378154	-	ENSG00000147044	CASK	protein_coding	1525	chrX	40944888	40984888	ENST00000378308	+	ENSG00000124486	USP9X	protein_coding	1500
chrX	44732757	44772757	ENST00000377967	+	ENSG00000147050	KDM6A	protein_coding	1550	chrX	46306732	46346732	ENST00000478600	+	ENSG00000147121	ZNF673	protein_coding	725
chrX	46306732	46346732	ENST00000478600	+	ENSG00000147121	ZNF673	protein_coding	725	chrX	46696375	46736375	ENST00000218340	+	ENSG00000102218	RP2	protein_coding	1450
chrX	51546103	51586103	ENST00000375772	+	ENSG00000179222	MAGED1	protein_coding	1175	chrX	53270796	53310796	ENST00000375365	-	ENSG00000124313	IQSEC2	protein_coding	1150
chrX	53270796	53310796	ENST00000375365	-	ENSG00000124313	IQSEC2	protein_coding	1150	chrX	53673673	53713673	ENST00000218328	-	ENSG00000086758	HUWE1	protein_coding	1350
chrX	54169688	54209688	ENST00000375180	-	ENSG00000184083	FAM120C	protein_coding	1450	chrX	54482599	54522599	ENST00000375135	-	ENSG00000102302	FGD1	protein_coding	1675
chrX	55744172	55784172	ENST00000374941	+	ENSG00000083750	RRAGB	protein_coding	1225	chrX	56755692	56795692	ENST00000374922	+	ENSG00000204272	RP11-622K12.1	lincRNA	1225
chrX	62740929	62780929	ENST00000433061	-	ENSG00000235437	RP11-357C3.3	processed_transcript	1025	chrX	62935031	62975031	ENST00000374870	-	ENSG00000131089	ARHGEF9	protein_coding	1000
chrX	64887537	64927537	ENST00000360270	+	ENSG00000147065	MSN	protein_coding	1550	chrX	62935031	62975031	ENST00000374870	-	ENSG00000131089	ARHGEF9	protein_coding	1000
chrX	67613647	67653647	ENST00000355520	-	ENSG00000079482	OPHN1	protein_coding	925	chrX	67867511	67907511	ENST00000523864	+	ENSG00000130052	STARD8	protein_coding	1100
chrX	69509879	69549879	ENST00000374388	+	ENSG00000090889	KIF4A	protein_coding	1400	chrX	70586114	70626114	ENST00000423759	+	ENSG00000147133	TAF1	protein_coding	775
chrX	70586114	70626114	ENST00000423759	+	ENSG00000147133	TAF1	protein_coding	775	chrX	70752933	70792933	ENST00000373719	+	ENSG00000147162	OGT	protein_coding	1525
chrX	72783044	72823044	ENST00000373502	+	ENSG00000204116	CHIC1	protein_coding	1000	chrX	73164177	73204177	ENST00000414209	+	ENSG00000225470	JPX	lincRNA	1125
chrX	73164177	73204177	ENST00000414209	+	ENSG00000225470	JPX	lincRNA	1125	chrX	73473362	73513362	ENST00000430772	-	ENSG00000230590	FTX	lincRNA	950
chrX	73473362	73513362	ENST00000430772	-	ENSG00000230590	FTX	lincRNA	950	chrX	73640638	73680638	ENST00000276033	+	ENSG00000147100	SLC16A2	protein_coding	1350
chrX	77001702	77041702	ENST00000373344	-	ENSG00000085224	ATRX	protein_coding	1600	chrX	73640638	73680638	ENST00000276033	+	ENSG00000147100	SLC16A2	protein_coding	1350
chrX	80457442	80497442	ENST00000373212	+	ENSG00000131171	SH3BGRL	protein_coding	1500	chrX	77001702	77041702	ENST00000373344	-	ENSG00000085224	ATRX	protein_coding	1600
chrX	84258832	84298832	ENST00000373173	+	ENSG00000155008	APOOL	protein_coding	1375	chrX	85262566	85302566	ENST00000357749	-	ENSG00000188419	CHM	protein_coding	1025
chrX	95939662	95979662	ENST00000355827	+	ENSG00000147202	DIAPH2	protein_coding	1150	chrX	100267105	100307105	ENST00000338687	-	ENSG00000188917	TRMT2B	protein_coding	425
chrX	100267105	100307105	ENST00000338687	-	ENSG00000188917	TRMT2B	protein_coding	425	chrX	100353178	100393178	ENST00000218507	+	ENSG00000102384	CENPI	protein_coding	825
chrX	101854453	101894453	ENST00000460026	+	ENSG00000125962	ARMCX5	protein_coding	1000	chrX	102024089	102064089	ENST00000431616	+	ENSG00000223546	LL0XNC01-157D4.1	lincRNA	775
chrX	106203474	106243474	ENST00000535534	-	ENSG00000133131	MORC4	protein_coding	950	chrX	106322057	106362057	ENST00000203616	-	ENSG00000089682	RBM41	protein_coding	1175
chrX	107069109	107109109	ENST00000262843	+	ENSG00000080561	MID2	protein_coding	1225	chrX	106322057	106362057	ENST00000203616	-	ENSG00000089682	RBM41	protein_coding	1175
chrX	108936632	108976632	ENST00000348502	-	ENSG00000068366	ACSL4	protein_coding	1300	chrX	109245863	109285863	ENST00000372072	+	ENSG00000157600	TMEM164	protein_coding	925
chrX	109245863	109285863	ENST00000372072	+	ENSG00000157600	TMEM164	protein_coding	925	chrX	109521467	109561467	ENST00000262844	-	ENSG00000101935	AMMECR1	protein_coding	1525
chrX	110924346	110964346	ENST00000251943	+	ENSG00000101901	ALG13	protein_coding	950	chrX	109521467	109561467	ENST00000262844	-	ENSG00000101935	AMMECR1	protein_coding	1525
chrX	117480036	117520036	ENST00000371822	+	ENSG00000131725	WDR44	protein_coding	1675	chrX	117629861	117669861	ENST00000276204	+	ENSG00000147251	DOCK11	protein_coding	825
chrX	118533023	118573023	ENST00000217909	+	ENSG00000077713	SLC25A43	protein_coding	1025	chrX	117629861	117669861	ENST00000276204	+	ENSG00000147251	DOCK11	protein_coding	825
chrX	119563220	119603220	ENST00000434600	-	ENSG00000005893	LAMP2	protein_coding	1425	chrX	118533023	118573023	ENST00000217909	+	ENSG00000077713	SLC25A43	protein_coding	1025
chrX	122318096	122358096	ENST00000264357	+	ENSG00000125675	GRIA3	protein_coding	1325	chrX	122826906	122866906	ENST00000355725	-	ENSG00000125676	THOC2	protein_coding	1375
chrX	122826906	122866906	ENST00000355725	-	ENSG00000125676	THOC2	protein_coding	1375	chrX	122993614	123033614	ENST00000481776	+	ENSG00000101966	XIAP	protein_coding	1300
chrX	122993614	123033614	ENST00000481776	+	ENSG00000101966	XIAP	protein_coding	1300	chrX	123094062	123134062	ENST00000394477	+	ENSG00000101972	STAG2	protein_coding	1775
chrX	128617477	128657477	ENST00000371122	-	ENSG00000102038	SMARCA1	protein_coding	1425	chrX	128674252	128714252	ENST00000357121	+	ENSG00000122126	OCRL	protein_coding	1450
chrX	129204691	129244691	ENST00000335997	-	ENSG00000102034	ELF4	protein_coding	1325	chrX	129362873	129402873	ENST00000370978	-	ENSG00000056277	ZNF280C	protein_coding	1150
chrX	133507283	133547283	ENST00000370803	+	ENSG00000156531	PHF6	protein_coding	1525	chrX	129362873	129402873	ENST00000370978	-	ENSG00000056277	ZNF280C	protein_coding	1150
chrX	138975229	139015229	ENST00000370557	-	ENSG00000101974	ATP11C	protein_coding	1225	chrX	133507283	133547283	ENST00000370803	+	ENSG00000156531	PHF6	protein_coding	1525
chrX	149737069	149777069	ENST00000370396	+	ENSG00000171100	MTM1	protein_coding	1000	chrX	149959722	149999722	ENST00000418547	-	ENSG00000102181	CD99L2	protein_coding	1075
chrX	149959722	149999722	ENST00000418547	-	ENSG00000102181	CD99L2	protein_coding	1075	chrX	150027289	150067289	ENST00000437787	-	ENSG00000102181	CD99L2	protein_coding	1100
chrX	153323212	153363212	ENST00000303391	-	ENSG00000169057	MECP2	protein_coding	1525	chrX	154299695	154339695	ENST00000340647	+	ENSG00000185515	BRCC3	protein_coding	1175
chrX	154299695	154339695	ENST00000340647	+	ENSG00000185515	BRCC3	protein_coding	1175	chrX	154802597	154842597	ENST00000334398	-	ENSG00000185973	TMLHE	protein_coding	1325
chrY	2803112	2843112	ENST00000431102	+	ENSG00000067646	ZFY	protein_coding	1475	chrY	7142013	7182013	ENST00000528056	+	ENSG00000099725	PRKY	pseudogene	1250
chrY	16634518	16674518	ENST00000471252	+	ENSG00000165246	NLGN4Y	protein_coding	1525	chrY	7142013	7182013	ENST00000528056	+	ENSG00000099725	PRKY	pseudogene	1250

## Sheet: CS-B
Gene 1 Chromosome	Gene 1 Start (analysis region)	Gene 1 End (analysis region)	Gene 1 Ensembl Transcript ID	Gene 1 Strand	Gene 1 Ensembl Gene ID	Gene 1 Gene Symbol	Gene 1 Ensembl Biotype	Gene 1 Elongation Rate	Gene 2 Chromosome	Gene 2 Start (analysis region)	Gene 2 End (analysis region)	Gene 2 Ensembl Transcript ID	Gene 2 Strand	Gene 2 Ensembl Gene ID	Gene 2 Gene Symbol	Gene 2 Ensembl Biotype	Gene 2 Elongation Rate
chr1	1782502	1822502	ENST00000378606	-	ENSG00000078369	GNB1	protein_coding	1575	chr1	2160134	2200134	ENST00000378536	+	ENSG00000157933	SKI	protein_coding	1525
chr1	3408012	3448012	ENST00000294599	-	ENSG00000162591	MEGF6	protein_coding	375	chr1	2160134	2200134	ENST00000378536	+	ENSG00000157933	SKI	protein_coding	1525
chr1	9844584	9884584	ENST00000377288	-	ENSG00000171603	CLSTN1	protein_coding	850	chr1	10092890	10132890	ENST00000253251	+	ENSG00000130939	UBE4B	protein_coding	850
chr1	10092890	10132890	ENST00000253251	+	ENSG00000130939	UBE4B	protein_coding	850	chr1	10270863	10310863	ENST00000377093	+	ENSG00000054523	KIF1B	protein_coding	1825
chr1	11994792	12034792	ENST00000376369	+	ENSG00000083444	PLOD1	protein_coding	450	chr1	12290124	12330124	ENST00000358136	+	ENSG00000048707	VPS13D	protein_coding	1200
chr1	14075930	14115930	ENST00000503842	+	ENSG00000116731	PRDM2	protein_coding	1600	chr1	12290124	12330124	ENST00000358136	+	ENSG00000048707	VPS13D	protein_coding	1200
chr1	16010827	16050827	ENST00000375799	+	ENSG00000116786	PLEKHM2	protein_coding	1300	chr1	16174359	16214359	ENST00000375759	+	ENSG00000065526	SPEN	protein_coding	1625
chr1	16638949	16678949	ENST00000375592	-	ENSG00000037637	FBXO42	protein_coding	1425	chr1	16174359	16214359	ENST00000375759	+	ENSG00000065526	SPEN	protein_coding	1625
chr1	17866330	17906330	ENST00000361221	+	ENSG00000074964	ARHGEF10L	protein_coding	1400	chr1	16638949	16678949	ENST00000375592	-	ENSG00000037637	FBXO42	protein_coding	1425
chr1	19772066	19812066	ENST00000401084	-	ENSG00000077549	CAPZB	protein_coding	1575	chr1	21073181	21113181	ENST00000312239	-	ENSG00000127483	HP1BP3	protein_coding	1600
chr1	21073181	21113181	ENST00000312239	-	ENSG00000127483	HP1BP3	protein_coding	1600	chr1	21463377	21503377	ENST00000438975	-	ENSG00000075151	EIF4G3	protein_coding	325
chr1	22223790	22263790	ENST00000374695	-	ENSG00000142798	HSPG2	protein_coding	1475	chr1	22379120	22419120	ENST00000400259	+	ENSG00000070831	CDC42	protein_coding	1650
chr1	23345941	23385941	ENST00000356634	+	ENSG00000004487	KDM1A	protein_coding	1850	chr1	22379120	22419120	ENST00000400259	+	ENSG00000070831	CDC42	protein_coding	1650
chr1	24742284	24782284	ENST00000374399	+	ENSG00000001461	NIPAL3	protein_coding	1200	chr1	25071848	25111848	ENST00000374379	+	ENSG00000169504	CLIC4	protein_coding	2050
chr1	25757388	25797388	ENST00000399763	+	ENSG00000204178	TMEM57	protein_coding	1900	chr1	25071848	25111848	ENST00000374379	+	ENSG00000169504	CLIC4	protein_coding	2050
chr1	27022524	27062524	ENST00000324856	+	ENSG00000117713	ARID1A	protein_coding	1100	chr1	27776669	27816669	ENST00000430629	-	ENSG00000158195	WASF2	protein_coding	1525
chr1	27776669	27816669	ENST00000430629	-	ENSG00000158195	WASF2	protein_coding	1525	chr1	27890942	27930942	ENST00000480033	-	ENSG00000126705	AHDC1	protein_coding	1225
chr1	28099694	28139694	ENST00000373943	+	ENSG00000117758	STX12	protein_coding	1300	chr1	27890942	27930942	ENST00000480033	-	ENSG00000126705	AHDC1	protein_coding	1225
chr1	31427906	31467906	ENST00000498419	-	ENSG00000134644	PUM1	protein_coding	375	chr1	31498838	31538838	ENST00000373741	-	ENSG00000134644	PUM1	protein_coding	1175
chr1	32129920	32169920	ENST00000373672	-	ENSG00000084636	COL16A1	protein_coding	650	chr1	32479467	32519467	ENST00000484270	+	ENSG00000121774	KHDRBS1	protein_coding	1300
chr1	32479467	32519467	ENST00000484270	+	ENSG00000121774	KHDRBS1	protein_coding	1300	chr1	32573639	32613639	ENST00000373625	+	ENSG00000025800	KPNA6	protein_coding	1375
chr1	33243754	33283754	ENST00000373477	-	ENSG00000134684	YARS	protein_coding	1175	chr1	33856653	33896653	ENST00000484692	-	ENSG00000134686	PHC2	protein_coding	1250
chr1	33283043	33323043	ENST00000373476	+	ENSG00000116497	S100PBP	protein_coding	175	chr1	33856653	33896653	ENST00000484692	-	ENSG00000134686	PHC2	protein_coding	1250
chr1	34591443	34631443	ENST00000241312	-	ENSG00000121904	CSMD2	protein_coding	800	chr1	35285336	35325336	ENST00000426886	-	ENSG00000163866	C1orf212	protein_coding	750
chr1	35285336	35325336	ENST00000426886	-	ENSG00000163866	C1orf212	protein_coding	750	chr1	35457569	35497569	ENST00000357182	-	ENSG00000163867	ZMYM6	protein_coding	2025
chr1	35734568	35774568	ENST00000373297	+	ENSG00000146463	ZMYM4	protein_coding	1275	chr1	35983551	36023551	ENST00000482929	-	ENSG00000142687	KIAA0319L	protein_coding	975
chr1	35983551	36023551	ENST00000482929	-	ENSG00000142687	KIAA0319L	protein_coding	975	chr1	36067445	36107445	ENST00000373237	-	ENSG00000126067	PSMB2	protein_coding	1525
chr1	36273773	36313773	ENST00000373210	+	ENSG00000134698	EIF2C4	protein_coding	1375	chr1	36067445	36107445	ENST00000373237	-	ENSG00000126067	PSMB2	protein_coding	1525
chr1	36690017	36730017	ENST00000354618	+	ENSG00000054118	THRAP3	protein_coding	1125	chr1	36273773	36313773	ENST00000373210	+	ENSG00000134698	EIF2C4	protein_coding	1375
chr1	39571083	39611083	ENST00000524432	+	ENSG00000127603	MACF1	protein_coding	1775	chr1	40309183	40349183	ENST00000495175	-	ENSG00000043514	TRIT1	protein_coding	1050
chr1	41157320	41197320	ENST00000467203	+	ENSG00000066136	NFYC	protein_coding	875	chr1	41667826	41707826	ENST00000488592	-	ENSG00000010803	SCMH1	protein_coding	700
chr1	44115829	44155829	ENST00000372396	+	ENSG00000066135	KDM4A	protein_coding	650	chr1	44780932	44820932	ENST00000452396	-	ENSG00000117419	ERI3	protein_coding	925
chr1	46112302	46152302	ENST00000355105	-	ENSG00000159592	GPBP1L1	protein_coding	1350	chr1	46269285	46309285	ENST00000361297	+	ENSG00000086015	MAST2	protein_coding	1375
chr1	47144824	47184824	ENST00000544071	-	ENSG00000159658	KIAA0494	protein_coding	600	chr1	47799469	47839469	ENST00000371873	+	ENSG00000162368	CMPK1	protein_coding	1075
chr1	51945000	51985000	ENST00000371733	-	ENSG00000085832	EPS15	protein_coding	1350	chr1	52082547	52122547	ENST00000337809	+	ENSG00000117859	OSBPL9	protein_coding	1400
chr1	52416436	52456436	ENST00000371655	-	ENSG00000169213	RAB3B	protein_coding	1425	chr1	52082547	52122547	ENST00000337809	+	ENSG00000117859	OSBPL9	protein_coding	1400
chr1	52979130	53019130	ENST00000484723	-	ENSG00000134744	ZCCHC11	protein_coding	1500	chr1	53192126	53232126	ENST00000443756	+	ENSG00000162378	ZYG11B	protein_coding	950
chr1	54832092	54872092	ENST00000371320	-	ENSG00000157216	SSBP3	protein_coding	1000	chr1	55641039	55681039	ENST00000294383	-	ENSG00000162402	USP24	protein_coding	1250
chr1	57005241	57045241	ENST00000371250	-	ENSG00000162407	PPAP2B	protein_coding	1625	chr1	55641039	55681039	ENST00000294383	-	ENSG00000162402	USP24	protein_coding	1250
chr1	59125764	59165764	ENST00000472487	-	ENSG00000162601	MYSM1	protein_coding	1150	chr1	57005241	57045241	ENST00000371250	-	ENSG00000162407	PPAP2B	protein_coding	1625
chr1	62151095	62191095	ENST00000294613	-	ENSG00000162604	TM2D1	protein_coding	800	chr1	63113969	63153969	ENST00000251157	-	ENSG00000116641	DOCK7	protein_coding	1250
chr1	65392187	65432187	ENST00000342505	-	ENSG00000162434	JAK1	protein_coding	1475	chr1	66258197	66298197	ENST00000329654	+	ENSG00000184588	PDE4B	protein_coding	1250
chr1	66258197	66298197	ENST00000329654	+	ENSG00000184588	PDE4B	protein_coding	1250	chr1	66797687	66837687	ENST00000371045	+	ENSG00000184588	PDE4B	protein_coding	2400
chr1	66797687	66837687	ENST00000371045	+	ENSG00000184588	PDE4B	protein_coding	2400	chr1	66999066	67039066	ENST00000237247	+	ENSG00000118473	SGIP1	protein_coding	1500
chr1	67390578	67430578	ENST00000355977	+	ENSG00000198160	MIER1	protein_coding	2025	chr1	66999066	67039066	ENST00000237247	+	ENSG00000118473	SGIP1	protein_coding	1500
chr1	68259150	68299150	ENST00000370982	-	ENSG00000172380	GNG12	protein_coding	1425	chr1	67390578	67430578	ENST00000355977	+	ENSG00000198160	MIER1	protein_coding	2025
chr1	70671365	70711365	ENST00000370951	+	ENSG00000116754	SRSF11	protein_coding	2750	chr1	70780417	70820417	ENST00000262346	-	ENSG00000118454	ANKRD13C	protein_coding	1300
chr1	72708417	72748417	ENST00000357731	-	ENSG00000172260	NEGR1	protein_coding	675	chr1	70780417	70820417	ENST00000262346	-	ENSG00000118454	ANKRD13C	protein_coding	1300
chr1	77333126	77373126	ENST00000477717	+	ENSG00000117069	ST6GALNAC5	protein_coding	700	chr1	77747736	77787736	ENST00000354567	+	ENSG00000154027	AK5	protein_coding	1000
chr1	77747736	77787736	ENST00000354567	+	ENSG00000154027	AK5	protein_coding	1000	chr1	78109104	78149104	ENST00000370798	-	ENSG00000036549	ZZZ3	protein_coding	1650
chr1	78109104	78149104	ENST00000370798	-	ENSG00000036549	ZZZ3	protein_coding	1650	chr1	78185537	78225537	ENST00000370792	-	ENSG00000077254	USP33	protein_coding	1300
chr1	78185537	78225537	ENST00000370792	-	ENSG00000077254	USP33	protein_coding	1300	chr1	78245309	78285309	ENST00000370791	+	ENSG00000180488	FAM73A	protein_coding	1175
chr1	78956757	78996757	ENST00000370756	+	ENSG00000122420	PTGFR	protein_coding	525	chr1	78245309	78285309	ENST00000370791	+	ENSG00000180488	FAM73A	protein_coding	1175
chr1	82266082	82306082	ENST00000319517	+	ENSG00000117114	LPHN2	protein_coding	1550	chr1	85116440	85156440	ENST00000476905	-	ENSG00000117155	SSX2IP	protein_coding	1425
chr1	85116440	85156440	ENST00000476905	-	ENSG00000117155	SSX2IP	protein_coding	1425	chr1	86004046	86044046	ENST00000535924	-	ENSG00000153904	DDAH1	protein_coding	1000
chr1	86004046	86044046	ENST00000535924	-	ENSG00000153904	DDAH1	protein_coding	1000	chr1	86134116	86174116	ENST00000431532	-	ENSG00000117174	ZNHIT6	protein_coding	1125
chr1	86822025	86862025	ENST00000370566	-	ENSG00000122417	ODF2L	protein_coding	1425	chr1	87340107	87380107	ENST00000469566	-	ENSG00000183291	RP4-604K5.1	protein_coding	1275
chr1	89149905	89189905	ENST00000316005	+	ENSG00000065243	PKN2	protein_coding	1250	chr1	89418604	89458604	ENST00000260508	-	ENSG00000137944	CCBL2	protein_coding	1325
chr1	90308607	90348607	ENST00000414841	+	ENSG00000171492	LRRC8D	protein_coding	1300	chr1	89418604	89458604	ENST00000260508	-	ENSG00000137944	CCBL2	protein_coding	1325
chr1	91447829	91487829	ENST00000361321	-	ENSG00000122482	ZNF644	protein_coding	1275	chr1	92311787	92351787	ENST00000212355	-	ENSG00000069702	TGFBR3	protein_coding	1150
chr1	93387057	93427057	ENST00000370310	-	ENSG00000154511	FAM69A	protein_coding	1275	chr1	93544792	93584792	ENST00000545708	+	ENSG00000143033	MTF2	protein_coding	1050
chr1	93913658	93953658	ENST00000370256	+	ENSG00000137942	FNBP1L	protein_coding	1375	chr1	94107385	94147385	ENST00000260502	-	ENSG00000137936	BCAR3	protein_coding	1450
chr1	94883933	94923933	ENST00000394233	+	ENSG00000117528	ABCD3	protein_coding	1025	chr1	94107385	94147385	ENST00000260502	-	ENSG00000137936	BCAR3	protein_coding	1450
chr1	97187221	97227221	ENST00000482253	+	ENSG00000117569	PTBP2	protein_coding	1325	chr1	98346605	98386605	ENST00000306031	-	ENSG00000188641	DPYD	protein_coding	1350
chr1	98346605	98386605	ENST00000306031	-	ENSG00000188641	DPYD	protein_coding	1350	chr1	99127236	99167236	ENST00000370189	+	ENSG00000162627	SNX7	protein_coding	975
chr1	100435345	100475345	ENST00000465289	+	ENSG00000117620	SLC35A3	protein_coding	1150	chr1	101361632	101401632	ENST00000370112	+	ENSG00000162695	SLC30A7	protein_coding	750
chr1	107682629	107722629	ENST00000370071	+	ENSG00000162631	NTNG1	protein_coding	250	chr1	108702980	108742980	ENST00000565488	-	ENSG00000085491	SLC25A24	protein_coding	850
chr1	108702980	108742980	ENST00000565488	-	ENSG00000085491	SLC25A24	protein_coding	850	chr1	109289310	109329310	ENST00000370008	+	ENSG00000116266	STXBP3	protein_coding	800
chr1	109289310	109329310	ENST00000370008	+	ENSG00000116266	STXBP3	protein_coding	800	chr1	109544850	109584850	ENST00000357672	-	ENSG00000085433	WDR47	protein_coding	1425
chr1	110091233	110131233	ENST00000369851	+	ENSG00000065135	GNAI3	protein_coding	1575	chr1	109544850	109584850	ENST00000357672	-	ENSG00000085433	WDR47	protein_coding	1425
chr1	111682249	111722249	ENST00000545121	+	ENSG00000134255	CEPT1	protein_coding	875	chr1	112162399	112202399	ENST00000433097	+	ENSG00000116473	RAP1A	protein_coding	1425
chr1	112938803	112978803	ENST00000271277	+	ENSG00000143079	CTTNBP2NL	protein_coding	1750	chr1	113161795	113201795	ENST00000263168	+	ENSG00000116489	CAPZA1	protein_coding	1550
chr1	113458975	113498975	ENST00000369626	-	ENSG00000155380	SLC16A1	protein_coding	1000	chr1	113615831	113655831	ENST00000361127	+	ENSG00000198799	LRIG2	protein_coding	675
chr1	113933371	113973371	ENST00000369617	+	ENSG00000081026	MAGI3	protein_coding	1250	chr1	113615831	113655831	ENST00000361127	+	ENSG00000198799	LRIG2	protein_coding	675
chr1	114315098	114355098	ENST00000261441	-	ENSG00000081019	RSBN1	protein_coding	1525	chr1	113933371	113973371	ENST00000369617	+	ENSG00000081026	MAGI3	protein_coding	1250
chr1	115013781	115053781	ENST00000358465	-	ENSG00000197323	TRIM33	protein_coding	1200	chr1	115260648	115300648	ENST00000530886	-	ENSG00000009307	CSDE1	protein_coding	1000
chr1	115840857	115880857	ENST00000369512	-	ENSG00000134259	NGF	protein_coding	1150	chr1	115260648	115300648	ENST00000530886	-	ENSG00000009307	CSDE1	protein_coding	1000
chr1	116519119	116559119	ENST00000369503	+	ENSG00000163393	SLC22A15	protein_coding	1150	chr1	115840857	115880857	ENST00000369512	-	ENSG00000134259	NGF	protein_coding	1150
chr1	117910071	117950071	ENST00000356554	+	ENSG00000198162	MAN1A2	protein_coding	1200	chr1	118432253	118472253	ENST00000369443	-	ENSG00000196505	GDAP2	protein_coding	1125
chr1	145000002	145040002	ENST00000313382	-	ENSG00000178104	PDE4DIP	protein_coding	875	chr1	146714291	146754291	ENST00000431239	+	ENSG00000131778	CHD1L	protein_coding	1075
chr1	149942625	149982625	ENST00000369135	-	ENSG00000163113	OTUD7B	protein_coding	1300	chr1	150039369	150079369	ENST00000369130	+	ENSG00000136631	VPS45	protein_coding	825
chr1	150809244	150849244	ENST00000358595	-	ENSG00000143437	ARNT	protein_coding	950	chr1	151171027	151211027	ENST00000349792	+	ENSG00000143398	PIP5K1A	protein_coding	925
chr1	151171027	151211027	ENST00000349792	+	ENSG00000143398	PIP5K1A	protein_coding	925	chr1	151391941	151431941	ENST00000271715	-	ENSG00000143442	POGZ	protein_coding	1600
chr1	151391941	151431941	ENST00000271715	-	ENSG00000143442	POGZ	protein_coding	1600	chr1	151512781	151552781	ENST00000392712	+	ENSG00000143367	TUFT1	protein_coding	1000
chr1	153855451	153895451	ENST00000368655	-	ENSG00000143614	GATAD2B	protein_coding	1925	chr1	154192655	154232655	ENST00000343815	+	ENSG00000143569	UBAP2L	protein_coding	1175
chr1	154560474	154600474	ENST00000292205	-	ENSG00000160710	ADAR	protein_coding	900	chr1	154192655	154232655	ENST00000343815	+	ENSG00000143569	UBAP2L	protein_coding	1175
chr1	155492598	155532598	ENST00000548830	-	ENSG00000116539	ASH1L	protein_coding	1250	chr1	154560474	154600474	ENST00000292205	-	ENSG00000160710	ADAR	protein_coding	900
chr1	157963063	158003063	ENST00000392272	+	ENSG00000183853	KIRREL	protein_coding	1475	chr1	160192321	160232321	ENST00000461888	-	ENSG00000132716	DCAF8	protein_coding	775
chr1	160192321	160232321	ENST00000461888	-	ENSG00000132716	DCAF8	protein_coding	775	chr1	160273190	160313190	ENST00000241704	-	ENSG00000122218	COPA	protein_coding	1150
chr1	161284047	161324047	ENST00000367975	+	ENSG00000143252	SDHC	protein_coding	1000	chr1	161736084	161776084	ENST00000367942	+	ENSG00000118217	ATF6	protein_coding	925
chr1	162601163	162641163	ENST00000446985	+	ENSG00000162733	DDR2	protein_coding	1675	chr1	161736084	161776084	ENST00000367942	+	ENSG00000118217	ATF6	protein_coding	925
chr1	165698417	165738417	ENST00000367881	-	ENSG00000143183	TMCO1	protein_coding	1525	chr1	165796768	165836768	ENST00000367879	+	ENSG00000143179	UCK2	protein_coding	1825
chr1	167691187	167731187	ENST00000359523	+	ENSG00000197965	MPZL1	protein_coding	1675	chr1	167905021	167945021	ENST00000450548	+	ENSG00000143164	DCAF6	protein_coding	1500
chr1	170003836	170043836	ENST00000361580	-	ENSG00000075945	KIFAP3	protein_coding	1250	chr1	170631869	170671869	ENST00000553786	+	ENSG00000116132	PRRX1	protein_coding	1925
chr1	171454651	171494651	ENST00000392078	+	ENSG00000117523	PRRC2C	protein_coding	1550	chr1	171671387	171711387	ENST00000236192	-	ENSG00000117533	VAMP4	protein_coding	1375
chr1	172501489	172541489	ENST00000367723	+	ENSG00000094975	C1orf9	protein_coding	1575	chr1	171671387	171711387	ENST00000236192	-	ENSG00000117533	VAMP4	protein_coding	1375
chr1	173951435	173991435	ENST00000367696	-	ENSG00000135870	RC3H1	protein_coding	1325	chr1	172501489	172541489	ENST00000367723	+	ENSG00000094975	C1orf9	protein_coding	1575
chr1	178062864	178102864	ENST00000448150	+	ENSG00000075391	RASAL2	protein_coding	1675	chr1	178694300	178734300	ENST00000495034	+	ENSG00000116191	RALGPS2	protein_coding	1475
chr1	178694300	178734300	ENST00000495034	+	ENSG00000116191	RALGPS2	protein_coding	1475	chr1	178995031	179035031	ENST00000263733	+	ENSG00000116199	FAM20B	protein_coding	1325
chr1	178995031	179035031	ENST00000263733	+	ENSG00000116199	FAM20B	protein_coding	1325	chr1	179072179	179112179	ENST00000408940	-	ENSG00000143322	ABL2	protein_coding	625
chr1	179158819	179198819	ENST00000392043	-	ENSG00000143322	ABL2	protein_coding	1100	chr1	179072179	179112179	ENST00000408940	-	ENSG00000143322	ABL2	protein_coding	625
chr1	179262925	179302925	ENST00000539888	+	ENSG00000057252	SOAT1	protein_coding	1400	chr1	179158819	179198819	ENST00000392043	-	ENSG00000143322	ABL2	protein_coding	1100
chr1	179923873	179963873	ENST00000367607	+	ENSG00000135837	CEP350	protein_coding	1525	chr1	180123969	180163969	ENST00000367602	+	ENSG00000116260	QSOX1	protein_coding	925
chr1	180432089	180472089	ENST00000367595	-	ENSG00000135847	ACBD6	protein_coding	1225	chr1	180601140	180641140	ENST00000367590	+	ENSG00000143324	XPR1	protein_coding	1650
chr1	180952047	180992047	ENST00000258301	-	ENSG00000135823	STX6	protein_coding	1300	chr1	180601140	180641140	ENST00000367590	+	ENSG00000143324	XPR1	protein_coding	1650
chr1	182808504	182848504	ENST00000367549	+	ENSG00000135829	DHX9	protein_coding	1350	chr1	182992597	183032597	ENST00000258341	+	ENSG00000135862	LAMC1	protein_coding	2250
chr1	183441351	183481351	ENST00000440812	+	ENSG00000116698	SMG7	protein_coding	1600	chr1	182992597	183032597	ENST00000258341	+	ENSG00000135862	LAMC1	protein_coding	2250
chr1	184356192	184396192	ENST00000235307	+	ENSG00000116667	C1orf21	protein_coding	875	chr1	184684047	184724047	ENST00000318130	-	ENSG00000116406	EDEM3	protein_coding	850
chr1	185014496	185054496	ENST00000367510	+	ENSG00000121481	RNF2	protein_coding	975	chr1	184684047	184724047	ENST00000318130	-	ENSG00000116406	EDEM3	protein_coding	850
chr1	185703683	185743683	ENST00000271588	+	ENSG00000143341	HMCN1	protein_coding	1500	chr1	186304457	186344457	ENST00000367478	-	ENSG00000047410	TPR	protein_coding	800
chr1	186304457	186344457	ENST00000367478	-	ENSG00000047410	TPR	protein_coding	800	chr1	186344890	186384890	ENST00000367470	+	ENSG00000157181	C1orf27	protein_coding	1350
chr1	192989237	193029237	ENST00000367452	-	ENSG00000116750	UCHL5	protein_coding	1250	chr1	193091147	193131147	ENST00000367435	+	ENSG00000134371	CDC73	protein_coding	1650
chr1	197704826	197744826	ENST00000477581	-	ENSG00000213047	DENND1B	protein_coding	1375	chr1	198126093	198166093	ENST00000367385	+	ENSG00000151414	NEK7	protein_coding	2175
chr1	198866539	198906539	ENST00000432296	-	ENSG00000229989	RP11-31E23.1	lincRNA	1725	chr1	198126093	198166093	ENST00000367385	+	ENSG00000151414	NEK7	protein_coding	2175
chr1	200708686	200748686	ENST00000358823	+	ENSG00000118200	CAMSAP2	protein_coding	1100	chr1	198866539	198906539	ENST00000432296	-	ENSG00000229989	RP11-31E23.1	lincRNA	1725
chr1	203595689	203635689	ENST00000357681	+	ENSG00000058668	ATP2B4	protein_coding	975	chr1	203764782	203804782	ENST00000453771	+	ENSG00000058673	ZC3H11A	protein_coding	1300
chr1	204797779	204837779	ENST00000404977	+	ENSG00000163531	NFASC	protein_coding	1300	chr1	205140727	205180727	ENST00000367160	-	ENSG00000133059	DSTYK	protein_coding	1350
chr1	206809073	206849073	ENST00000489878	+	ENSG00000143479	DYRK3	protein_coding	1900	chr1	206858289	206898289	ENST00000294981	+	ENSG00000162889	MAPKAPK2	protein_coding	1525
chr1	207925402	207965402	ENST00000358170	+	ENSG00000117335	CD46	protein_coding	1125	chr1	206858289	206898289	ENST00000294981	+	ENSG00000162889	MAPKAPK2	protein_coding	1525
chr1	211267457	211307457	ENST00000367007	-	ENSG00000143473	KCNH1	protein_coding	825	chr1	211432621	211472621	ENST00000367006	+	ENSG00000117625	RCOR3	protein_coding	1075
chr1	211964114	212004114	ENST00000366997	-	ENSG00000123684	LPGAT1	protein_coding	750	chr1	211432621	211472621	ENST00000367006	+	ENSG00000117625	RCOR3	protein_coding	1075
chr1	213224589	213264589	ENST00000543470	+	ENSG00000136643	RPS6KC1	protein_coding	1300	chr1	211964114	212004114	ENST00000366997	-	ENSG00000123684	LPGAT1	protein_coding	750
chr1	214776538	214816538	ENST00000366955	+	ENSG00000117724	CENPF	protein_coding	1500	chr1	215179118	215219118	ENST00000486921	+	ENSG00000082482	KCNK2	protein_coding	1925
chr1	215740735	215780735	ENST00000259154	+	ENSG00000136636	KCTD3	protein_coding	1575	chr1	215179118	215219118	ENST00000486921	+	ENSG00000082482	KCNK2	protein_coding	1925
chr1	217764424	217804424	ENST00000366935	-	ENSG00000092978	GPATCH2	protein_coding	1150	chr1	218458629	218498629	ENST00000366932	+	ENSG00000067533	RRP15	protein_coding	975
chr1	218458629	218498629	ENST00000366932	+	ENSG00000067533	RRP15	protein_coding	975	chr1	218519577	218559577	ENST00000366929	+	ENSG00000092969	TGFB2	protein_coding	1050
chr1	220180000	220220000	ENST00000366923	-	ENSG00000136628	EPRS	protein_coding	725	chr1	220405796	220445796	ENST00000358951	-	ENSG00000118873	RAB3GAP2	protein_coding	1025
chr1	221875518	221915518	ENST00000366899	-	ENSG00000143507	DUSP10	protein_coding	1550	chr1	222846526	222886526	ENST00000541237	-	ENSG00000186063	AIDA	protein_coding	1200
chr1	224301789	224341789	ENST00000366862	+	ENSG00000143756	FBXO28	protein_coding	1225	chr1	224478089	224518089	ENST00000281701	-	ENSG00000143748	NVL	protein_coding	1325
chr1	224478089	224518089	ENST00000281701	-	ENSG00000143748	NVL	protein_coding	1325	chr1	224582001	224622001	ENST00000414423	-	ENSG00000162923	WDR26	protein_coding	1150
chr1	224803995	224843995	ENST00000272133	+	ENSG00000143786	CNIH3	protein_coding	1675	chr1	224582001	224622001	ENST00000414423	-	ENSG00000162923	WDR26	protein_coding	1150
chr1	225800844	225840844	ENST00000366844	-	ENSG00000154380	ENAH	protein_coding	1700	chr1	226334431	226374431	ENST00000366812	-	ENSG00000182827	ACBD3	protein_coding	1125
chr1	227466175	227506175	ENST00000366769	-	ENSG00000143776	CDC42BPA	protein_coding	1325	chr1	226334431	226374431	ENST00000366812	-	ENSG00000182827	ACBD3	protein_coding	1125
chr1	230202956	230242956	ENST00000366672	+	ENSG00000143641	GALNT2	protein_coding	1075	chr1	227466175	227506175	ENST00000366769	-	ENSG00000143776	CDC42BPA	protein_coding	1325
chr1	233391459	233431459	ENST00000430153	-	ENSG00000135749	PCNXL2	protein_coding	1300	chr1	235451534	235491534	ENST00000349213	-	ENSG00000054267	ARID4B	protein_coding	1525
chr1	235451534	235491534	ENST00000349213	-	ENSG00000054267	ARID4B	protein_coding	1525	chr1	235627781	235667781	ENST00000366600	-	ENSG00000162885	B3GALNT2	protein_coding	1600
chr1	235990220	236030220	ENST00000389793	-	ENSG00000143669	LYST	protein_coding	1275	chr1	236188462	236228462	ENST00000264187	-	ENSG00000116962	NID1	protein_coding	700
chr1	236727804	236767804	ENST00000366581	-	ENSG00000119285	HEATR1	protein_coding	1100	chr1	236958610	236998610	ENST00000366577	+	ENSG00000116984	MTR	protein_coding	1775
chr1	240255180	240295180	ENST00000319653	+	ENSG00000155816	FMN2	protein_coding	1325	chr1	240735449	240775449	ENST00000318160	-	ENSG00000180875	GREM2	protein_coding	625
chr1	241763701	241803701	ENST00000331838	-	ENSG00000054277	OPN3	protein_coding	1150	chr1	240735449	240775449	ENST00000318160	-	ENSG00000180875	GREM2	protein_coding	625
chr1	243419320	243459320	ENST00000355875	+	ENSG00000054282	SDCCAG8	protein_coding	1925	chr1	244575436	244615436	ENST00000366535	-	ENSG00000035687	ADSS	protein_coding	1000
chr1	244575436	244615436	ENST00000366535	-	ENSG00000035687	ADSS	protein_coding	1000	chr1	244816237	244856237	ENST00000302550	+	ENSG00000121644	DESI2	protein_coding	1025
chr1	245318287	245358287	ENST00000407071	+	ENSG00000162849	KIF26B	protein_coding	700	chr1	244816237	244856237	ENST00000302550	+	ENSG00000121644	DESI2	protein_coding	1025
chr1	246630614	246670614	ENST00000403792	-	ENSG00000185420	SMYD3	protein_coding	700	chr1	246729746	246769746	ENST00000483271	+	ENSG00000162852	CNST	protein_coding	1825
chr1	247054726	247094726	ENST00000326225	-	ENSG00000153207	AHCTF1	protein_coding	1325	chr1	246729746	246769746	ENST00000483271	+	ENSG00000162852	CNST	protein_coding	1825
chr10	180405	220405	ENST00000439456	+	ENSG00000015171	ZMYND11	protein_coding	1375	chr10	695683	735683	ENST00000423550	-	ENSG00000151240	DIP2C	protein_coding	975
chr10	695683	735683	ENST00000423550	-	ENSG00000151240	DIP2C	protein_coding	975	chr10	937564	977564	ENST00000406525	-	ENSG00000107929	LARP4B	protein_coding	1675
chr10	5726801	5766801	ENST00000328090	+	ENSG00000108021	FAM208B	protein_coding	1600	chr10	5815512	5855512	ENST00000380191	-	ENSG00000057608	GDI2	protein_coding	1325
chr10	5931535	5971535	ENST00000397269	+	ENSG00000134452	FBXO18	protein_coding	925	chr10	5815512	5855512	ENST00000380191	-	ENSG00000057608	GDI2	protein_coding	1325
chr10	12045023	12085023	ENST00000397053	-	ENSG00000151461	UPF2	protein_coding	1575	chr10	15862519	15902519	ENST00000277632	-	ENSG00000148481	FAM188A	protein_coding	1200
chr10	15862519	15902519	ENST00000277632	-	ENSG00000148481	FAM188A	protein_coding	1200	chr10	17686124	17726124	ENST00000377524	+	ENSG00000136738	STAM	protein_coding	1875
chr10	21823102	21863102	ENST00000377072	+	ENSG00000078403	MLLT10	protein_coding	825	chr10	22963484	23003484	ENST00000376573	-	ENSG00000150867	PIP4K2A	protein_coding	1125
chr10	27110016	27150016	ENST00000376134	-	ENSG00000136754	ABI1	protein_coding	1225	chr10	27300293	27340293	ENST00000376070	-	ENSG00000107890	ANKRD26	protein_coding	275
chr10	27300293	27340293	ENST00000376070	-	ENSG00000107890	ANKRD26	protein_coding	275	chr10	27403321	27443321	ENST00000376016	-	ENSG00000136758	YME1L1	protein_coding	1025
chr10	28821422	28861422	ENST00000375664	+	ENSG00000095787	WAC	protein_coding	1150	chr10	27403321	27443321	ENST00000376016	-	ENSG00000136758	YME1L1	protein_coding	1025
chr10	30308453	30348453	ENST00000375377	-	ENSG00000165757	KIAA1462	protein_coding	1075	chr10	28821422	28861422	ENST00000375664	+	ENSG00000095787	WAC	protein_coding	1150
chr10	32177742	32217742	ENST00000375250	-	ENSG00000165322	ARHGAP12	protein_coding	2100	chr10	32305359	32345359	ENST00000302418	-	ENSG00000170759	KIF5B	protein_coding	1125
chr10	33207147	33247147	ENST00000374956	-	ENSG00000150093	ITGB1	protein_coding	1225	chr10	32305359	32345359	ENST00000302418	-	ENSG00000170759	KIF5B	protein_coding	1125
chr10	35625455	35665455	ENST00000537547	+	ENSG00000108100	CCNY	protein_coding	1475	chr10	33207147	33247147	ENST00000374956	-	ENSG00000150093	ITGB1	protein_coding	1225
chr10	43278249	43318249	ENST00000374518	+	ENSG00000165733	BMS1	protein_coding	800	chr10	43633934	43673934	ENST00000374466	+	ENSG00000169826	CSGALNACT2	protein_coding	1425
chr10	44840497	44880497	ENST00000395795	-	ENSG00000107562	CXCL12	protein_coding	1500	chr10	43633934	43673934	ENST00000374466	+	ENSG00000169826	CSGALNACT2	protein_coding	1425
chr10	49773138	49813138	ENST00000249601	-	ENSG00000128805	ARHGAP22	protein_coding	575	chr10	50707072	50747072	ENST00000355832	-	ENSG00000225830	ERCC6	protein_coding	1600
chr10	52750945	52790945	ENST00000401604	+	ENSG00000185532	PRKG1	protein_coding	1575	chr10	50707072	50747072	ENST00000355832	-	ENSG00000225830	ERCC6	protein_coding	1600
chr10	59987694	60027694	ENST00000373935	-	ENSG00000151151	IPMK	protein_coding	1325	chr10	60272900	60312900	ENST00000373886	+	ENSG00000122870	BICC1	protein_coding	900
chr10	61626414	61666414	ENST00000263102	-	ENSG00000108091	CCDC6	protein_coding	1100	chr10	62664005	62704005	ENST00000337910	-	ENSG00000072422	RHOBTB1	protein_coding	1300
chr10	65281123	65321123	ENST00000373758	+	ENSG00000165476	REEP3	protein_coding	975	chr10	62664005	62704005	ENST00000337910	-	ENSG00000072422	RHOBTB1	protein_coding	1300
chr10	69795105	69835105	ENST00000373700	-	ENSG00000148634	HERC4	protein_coding	1050	chr10	70247231	70287231	ENST00000265870	-	ENSG00000122912	SLC25A16	protein_coding	1075
chr10	70247231	70287231	ENST00000265870	-	ENSG00000122912	SLC25A16	protein_coding	1075	chr10	70480971	70520971	ENST00000535016	+	ENSG00000060339	CCAR1	protein_coding	750
chr10	70480971	70520971	ENST00000535016	+	ENSG00000060339	CCAR1	protein_coding	750	chr10	70661034	70701034	ENST00000373585	+	ENSG00000107625	DDX50	protein_coding	450
chr10	70883268	70923268	ENST00000373382	+	ENSG00000122958	VPS26A	protein_coding	1475	chr10	70661034	70701034	ENST00000373585	+	ENSG00000107625	DDX50	protein_coding	450
chr10	74345899	74385899	ENST00000398761	-	ENSG00000107745	MICU1	protein_coding	1125	chr10	74451889	74491889	ENST00000373053	+	ENSG00000156026	MCU	protein_coding	1250
chr10	75594343	75634343	ENST00000394762	-	ENSG00000148660	CAMK2G	protein_coding	550	chr10	75757872	75797872	ENST00000372755	+	ENSG00000035403	VCL	protein_coding	1625
chr10	75936444	75976444	ENST00000372734	+	ENSG00000156110	ADK	protein_coding	1375	chr10	75757872	75797872	ENST00000372755	+	ENSG00000035403	VCL	protein_coding	1625
chr10	76871229	76911229	ENST00000372690	+	ENSG00000156671	SAMD8	protein_coding	1450	chr10	77121004	77161004	ENST00000418818	-	ENSG00000165655	ZNF503	protein_coding	800
chr10	79358353	79398353	ENST00000286627	-	ENSG00000156113	KCNMA1	protein_coding	1050	chr10	79749303	79789303	ENST00000372371	-	ENSG00000148606	POLR3A	protein_coding	1050
chr10	80828792	80868792	ENST00000334512	+	ENSG00000108175	ZMIZ1	protein_coding	2025	chr10	79749303	79789303	ENST00000372371	-	ENSG00000148606	POLR3A	protein_coding	1050
chr10	86088342	86128342	ENST00000359979	+	ENSG00000107771	FAM190B	protein_coding	1725	chr10	86184695	86224695	ENST00000543283	+	ENSG00000107771	FAM190B	protein_coding	250
chr10	88241572	88281572	ENST00000342368	-	ENSG00000062650	WAPAL	protein_coding	1125	chr10	88516396	88556396	ENST00000224764	+	ENSG00000107779	BMPR1A	protein_coding	1350
chr10	88814623	88854623	ENST00000277865	-	ENSG00000148672	GLUD1	protein_coding	1025	chr10	88854953	88894953	ENST00000298784	+	ENSG00000122376	FAM35A	protein_coding	1500
chr10	89264632	89304632	ENST00000371994	+	ENSG00000107789	MINPP1	protein_coding	975	chr10	89419370	89459370	ENST00000361175	+	ENSG00000198682	PAPSS2	protein_coding	1150
chr10	89419370	89459370	ENST00000361175	+	ENSG00000198682	PAPSS2	protein_coding	1150	chr10	89537917	89577917	ENST00000541004	-	ENSG00000138138	ATAD1	protein_coding	1550
chr10	89537917	89577917	ENST00000541004	-	ENSG00000138138	ATAD1	protein_coding	1550	chr10	89622870	89662870	ENST00000371953	+	ENSG00000171862	PTEN	protein_coding	1625
chr10	92979908	93019908	ENST00000543648	+	ENSG00000180628	PCGF5	protein_coding	875	chr10	93170096	93210096	ENST00000446394	+	ENSG00000165338	HECTD2	protein_coding	1550
chr10	93558069	93598069	ENST00000371627	+	ENSG00000107854	TNKS2	protein_coding	1100	chr10	93683526	93723526	ENST00000265990	+	ENSG00000095564	BTAF1	protein_coding	1500
chr10	94050920	94090920	ENST00000358935	+	ENSG00000198060	2013-03-05	protein_coding	1500	chr10	94293833	94333833	ENST00000265986	-	ENSG00000119912	IDE	protein_coding	1225
chr10	95202074	95242074	ENST00000371489	-	ENSG00000138119	MYOF	protein_coding	950	chr10	94293833	94333833	ENST00000265986	-	ENSG00000119912	IDE	protein_coding	1225
chr10	96162261	96202261	ENST00000225235	+	ENSG00000108239	TBC1D12	protein_coding	1200	chr10	97010781	97050781	ENST00000329399	-	ENSG00000107438	PDLIM1	protein_coding	1325
chr10	97889829	97929829	ENST00000563195	+	ENSG00000177853	ZNF518A	lincRNA	925	chr10	98306809	98346809	ENST00000371142	-	ENSG00000077147	TM9SF3	protein_coding	1200
chr10	98306809	98346809	ENST00000371142	-	ENSG00000077147	TM9SF3	protein_coding	1200	chr10	98592017	98632017	ENST00000540664	+	ENSG00000196233	LCOR	protein_coding	1325
chr10	99218513	99258513	ENST00000370782	-	ENSG00000155229	MMS19	protein_coding	1150	chr10	99258625	99298625	ENST00000370664	+	ENSG00000165886	UBTD1	protein_coding	1500
chr10	99894387	99934387	ENST00000370584	+	ENSG00000166024	R3HCC1L	protein_coding	1200	chr10	99258625	99298625	ENST00000370664	+	ENSG00000165886	UBTD1	protein_coding	1500
chr10	101088856	101128856	ENST00000356713	+	ENSG00000119946	CNNM1	protein_coding	825	chr10	101419263	101459263	ENST00000370489	+	ENSG00000198018	ENTPD7	protein_coding	1575
chr10	101419263	101459263	ENST00000370489	+	ENSG00000198018	ENTPD7	protein_coding	1575	chr10	101729676	101769676	ENST00000324109	-	ENSG00000107554	DNMBP	protein_coding	1600
chr10	102672720	102712720	ENST00000238961	+	ENSG00000119906	FAM178A	protein_coding	500	chr10	103113820	103153820	ENST00000370187	+	ENSG00000166167	BTRC	protein_coding	600
chr10	103113820	103153820	ENST00000370187	+	ENSG00000166167	BTRC	protein_coding	600	chr10	103415110	103455110	ENST00000457105	-	ENSG00000107829	FBXW4	protein_coding	950
chr10	104005289	104045289	ENST00000369983	+	ENSG00000107862	GBF1	protein_coding	1525	chr10	104503727	104543727	ENST00000448841	+	ENSG00000166272	WBP1L	protein_coding	1025
chr10	104503727	104543727	ENST00000448841	+	ENSG00000166272	WBP1L	protein_coding	1025	chr10	104678071	104718071	ENST00000433628	+	ENSG00000148842	CNNM2	protein_coding	1225
chr10	104913056	104953056	ENST00000343289	-	ENSG00000076685	NT5C2	protein_coding	1075	chr10	104678071	104718071	ENST00000433628	+	ENSG00000148842	CNNM2	protein_coding	1225
chr10	105156405	105196405	ENST00000369797	+	ENSG00000148843	PDCD11	protein_coding	950	chr10	104913056	104953056	ENST00000343289	-	ENSG00000076685	NT5C2	protein_coding	1075
chr10	105726959	105766959	ENST00000369755	+	ENSG00000065613	SLK	protein_coding	1850	chr10	105156405	105196405	ENST00000369797	+	ENSG00000148843	PDCD11	protein_coding	950
chr10	112679301	112719301	ENST00000265277	+	ENSG00000108061	SHOC2	protein_coding	1625	chr10	114710009	114750009	ENST00000543371	+	ENSG00000148737	TCF7L2	protein_coding	1250
chr10	114710009	114750009	ENST00000543371	+	ENSG00000148737	TCF7L2	protein_coding	1250	chr10	115614420	115654420	ENST00000369301	+	ENSG00000196865	NHLRC2	protein_coding	850
chr10	116581503	116621503	ENST00000369248	+	ENSG00000151553	FAM160B1	protein_coding	1500	chr10	115614420	115654420	ENST00000369301	+	ENSG00000196865	NHLRC2	protein_coding	850
chr10	119094978	119134978	ENST00000334464	-	ENSG00000165650	PDZD8	protein_coding	1775	chr10	119766114	119806114	ENST00000355624	-	ENSG00000107560	RAB11FIP2	protein_coding	775
chr10	120474761	120514761	ENST00000493518	-	ENSG00000151893	CACUL1	protein_coding	1475	chr10	120800396	120840396	ENST00000478852	-	ENSG00000107581	EIF3A	protein_coding	1150
chr10	121593133	121633133	ENST00000466047	-	ENSG00000197771	MCMBP	protein_coding	1725	chr10	121652223	121692223	ENST00000369075	+	ENSG00000107651	SEC23IP	protein_coding	1375
chr10	122610695	122650695	ENST00000263461	+	ENSG00000120008	WDR11	protein_coding	1050	chr10	121652223	121692223	ENST00000369075	+	ENSG00000107651	SEC23IP	protein_coding	1375
chr10	123648316	123688316	ENST00000535655	-	ENSG00000107669	ATE1	protein_coding	650	chr10	124134173	124174173	ENST00000479786	+	ENSG00000107679	PLEKHA1	protein_coding	775
chr10	124134173	124174173	ENST00000479786	+	ENSG00000107679	PLEKHA1	protein_coding	775	chr10	124221041	124261041	ENST00000368984	+	ENSG00000166033	HTRA1	protein_coding	1475
chr10	126440296	126480296	ENST00000494792	-	ENSG00000258539	RP11-12J10.3	protein_coding	750	chr10	127408084	127448084	ENST00000419769	+	ENSG00000107938	C10orf137	protein_coding	550
chr10	127408084	127448084	ENST00000419769	+	ENSG00000107938	C10orf137	protein_coding	550	chr10	128037024	128077024	ENST00000368676	-	ENSG00000148848	ADAM12	protein_coding	1600
chr10	128037024	128077024	ENST00000368676	-	ENSG00000148848	ADAM12	protein_coding	1600	chr10	128593978	128633978	ENST00000280333	+	ENSG00000150760	DOCK1	protein_coding	2200
chr10	131934663	131974663	ENST00000368644	+	ENSG00000108010	GLRX3	protein_coding	1450	chr10	128593978	128633978	ENST00000280333	+	ENSG00000150760	DOCK1	protein_coding	2200
chr11	924894	964894	ENST00000529818	+	ENSG00000183020	AP2A2	protein_coding	1300	chr11	3038843	3078843	ENST00000397111	-	ENSG00000110619	CARS	protein_coding	700
chr11	3038843	3078843	ENST00000397111	-	ENSG00000110619	CARS	protein_coding	700	chr11	3779022	3819022	ENST00000359171	-	ENSG00000110713	NUP98	protein_coding	1025
chr11	8852965	8892965	ENST00000533471	-	ENSG00000166444	ST5	protein_coding	900	chr11	9246937	9286937	ENST00000328194	-	ENSG00000184014	DENND5A	protein_coding	1500
chr11	9246937	9286937	ENST00000328194	-	ENSG00000184014	DENND5A	protein_coding	1500	chr11	9406169	9446169	ENST00000379719	+	ENSG00000205339	IPO7	protein_coding	1750
chr11	9685624	9725624	ENST00000447399	+	ENSG00000133789	SWAP70	protein_coding	1775	chr11	9406169	9446169	ENST00000379719	+	ENSG00000205339	IPO7	protein_coding	1750
chr11	11862970	11902970	ENST00000339865	+	ENSG00000170242	USP47	protein_coding	1975	chr11	11991316	12031316	ENST00000525493	-	ENSG00000050165	DKK3	protein_coding	1425
chr11	12132138	12172138	ENST00000256194	+	ENSG00000133816	MICAL2	protein_coding	1900	chr11	11991316	12031316	ENST00000525493	-	ENSG00000050165	DKK3	protein_coding	1425
chr11	12398732	12438732	ENST00000334956	+	ENSG00000197702	PARVA	protein_coding	1150	chr11	12132138	12172138	ENST00000256194	+	ENSG00000133816	MICAL2	protein_coding	1900
chr11	12695969	12735969	ENST00000361905	+	ENSG00000187079	TEAD1	protein_coding	1550	chr11	12398732	12438732	ENST00000334956	+	ENSG00000197702	PARVA	protein_coding	1150
chr11	13444844	13484844	ENST00000525108	-	ENSG00000148925	BTBD10	protein_coding	1375	chr11	12695969	12735969	ENST00000361905	+	ENSG00000187079	TEAD1	protein_coding	1550
chr11	14481441	14521441	ENST00000439561	-	ENSG00000129083	COPB1	protein_coding	825	chr11	13444844	13484844	ENST00000525108	-	ENSG00000148925	BTBD10	protein_coding	1375
chr11	17189530	17229530	ENST00000540361	-	ENSG00000011405	PIK3C2A	protein_coding	1200	chr11	18303721	18343721	ENST00000396253	-	ENSG00000110756	HPS5	protein_coding	1675
chr11	18303721	18343721	ENST00000396253	-	ENSG00000110756	HPS5	protein_coding	1675	chr11	18343842	18383842	ENST00000453096	+	ENSG00000110768	GTF2H1	protein_coding	1250
chr11	27683180	27723180	ENST00000584049	-	ENSG00000176697	BDNF	protein_coding	1275	chr11	28129795	28169795	ENST00000406787	+	ENSG00000169519	METTL15	protein_coding	1175
chr11	32914724	32954724	ENST00000399302	+	ENSG00000060749	QSER1	protein_coding	1525	chr11	33143011	33183011	ENST00000323959	-	ENSG00000176102	CSTF3	protein_coding	1100
chr11	33143011	33183011	ENST00000323959	-	ENSG00000176102	CSTF3	protein_coding	1100	chr11	33278218	33318218	ENST00000525975	+	ENSG00000110422	HIPK3	protein_coding	1825
chr11	34073230	34113230	ENST00000341394	+	ENSG00000135387	CAPRIN1	protein_coding	1450	chr11	34339555	34379555	ENST00000435224	-	ENSG00000166016	ABTB2	protein_coding	950
chr11	34897883	34937883	ENST00000278359	-	ENSG00000149089	APIP	protein_coding	1050	chr11	35160417	35200417	ENST00000263398	+	ENSG00000026508	CD44	protein_coding	1775
chr11	34937376	34977376	ENST00000533550	+	ENSG00000110435	PDHX	protein_coding	1175	chr11	35160417	35200417	ENST00000263398	+	ENSG00000026508	CD44	protein_coding	1775
chr11	35511848	35551848	ENST00000532848	-	ENSG00000149090	PAMR1	protein_coding	1700	chr11	35684353	35724353	ENST00000299413	+	ENSG00000166326	TRIM44	protein_coding	1250
chr11	36397535	36437535	ENST00000311599	+	ENSG00000135362	PRR5L	protein_coding	1125	chr11	35684353	35724353	ENST00000299413	+	ENSG00000166326	TRIM44	protein_coding	1250
chr11	43380482	43420482	ENST00000299240	+	ENSG00000052841	TTC17	protein_coding	1200	chr11	43702230	43742230	ENST00000527433	+	ENSG00000149084	HSD17B12	protein_coding	1350
chr11	44932840	44972840	ENST00000354556	-	ENSG00000175274	TP53I11	protein_coding	1900	chr11	43702230	43742230	ENST00000527433	+	ENSG00000149084	HSD17B12	protein_coding	1350
chr11	46299212	46339212	ENST00000529193	+	ENSG00000157613	CREB3L1	protein_coding	950	chr11	46575675	46615675	ENST00000526606	-	ENSG00000110497	AMBRA1	protein_coding	800
chr11	47290927	47330927	ENST00000342922	+	ENSG00000110514	MADD	protein_coding	750	chr11	47534669	47574669	ENST00000310513	-	ENSG00000149187	CELF1	protein_coding	1650
chr11	47534669	47574669	ENST00000310513	-	ENSG00000149187	CELF1	protein_coding	1650	chr11	47748853	47788853	ENST00000263773	-	ENSG00000109920	FNBP4	protein_coding	725
chr11	48002113	48042113	ENST00000418331	+	ENSG00000149177	PTPRJ	protein_coding	1275	chr11	47748853	47788853	ENST00000263773	-	ENSG00000109920	FNBP4	protein_coding	725
chr11	58631688	58671688	ENST00000533636	-	ENSG00000156689	GLYATL2	protein_coding	1375	chr11	59343617	59383617	ENST00000263847	-	ENSG00000110048	OSBP	protein_coding	975
chr11	59343617	59383617	ENST00000263847	-	ENSG00000110048	OSBP	protein_coding	975	chr11	59522532	59562532	ENST00000535361	+	ENSG00000166900	STX3	protein_coding	1550
chr11	61196692	61236692	ENST00000544025	+	ENSG00000256591	RP11-286N22.8	protein_coding	1100	chr11	59522532	59562532	ENST00000535361	+	ENSG00000166900	STX3	protein_coding	1550
chr11	63399381	63439381	ENST00000538786	-	ENSG00000184743	ATL3	protein_coding	1325	chr11	63448918	63488918	ENST00000341307	+	ENSG00000133318	RTN3	protein_coding	1075
chr11	63606400	63646400	ENST00000413835	+	ENSG00000072518	MARK2	protein_coding	1325	chr11	63448918	63488918	ENST00000341307	+	ENSG00000133318	RTN3	protein_coding	1075
chr11	65837834	65877834	ENST00000527224	+	ENSG00000175115	PACS1	protein_coding	1575	chr11	66886740	66926740	ENST00000398645	+	ENSG00000173120	KDM2A	protein_coding	1075
chr11	67941295	67981295	ENST00000405515	-	ENSG00000110066	SUV420H1	protein_coding	500	chr11	68228186	68268186	ENST00000393799	+	ENSG00000110075	PPP6R3	protein_coding	1425
chr11	70116806	70156806	ENST00000253925	+	ENSG00000131626	PPFIA1	protein_coding	875	chr11	68228186	68268186	ENST00000393799	+	ENSG00000110075	PPP6R3	protein_coding	1425
chr11	72813306	72853306	ENST00000409418	-	ENSG00000137478	FCHSD2	protein_coding	950	chr11	73269234	73309234	ENST00000064778	-	ENSG00000054965	FAM168A	protein_coding	1450
chr11	73269234	73309234	ENST00000064778	-	ENSG00000054965	FAM168A	protein_coding	1450	chr11	73432182	73472182	ENST00000310653	-	ENSG00000175582	RAB6A	protein_coding	1350
chr11	73842064	73882064	ENST00000334126	-	ENSG00000168014	C2CD3	protein_coding	1125	chr11	73882144	73922144	ENST00000328257	+	ENSG00000214517	PPME1	protein_coding	1700
chr11	74459913	74499913	ENST00000299563	+	ENSG00000166439	RNF169	protein_coding	825	chr11	73882144	73922144	ENST00000328257	+	ENSG00000214517	PPME1	protein_coding	1700
chr11	77083109	77123109	ENST00000530617	-	ENSG00000149269	PAK1	protein_coding	1050	chr11	77492063	77532063	ENST00000308488	-	ENSG00000048649	RSF1	protein_coding	1200
chr11	78089394	78129394	ENST00000528886	-	ENSG00000033327	GAB2	protein_coding	1500	chr11	77492063	77532063	ENST00000308488	-	ENSG00000048649	RSF1	protein_coding	1200
chr11	82742965	82782965	ENST00000534141	-	ENSG00000137502	RAB30	protein_coding	1425	chr11	85740924	85780924	ENST00000528398	-	ENSG00000073921	PICALM	protein_coding	1825
chr11	85740924	85780924	ENST00000528398	-	ENSG00000073921	PICALM	protein_coding	1825	chr11	88030955	88070955	ENST00000227266	-	ENSG00000109861	CTSC	protein_coding	1700
chr11	94501508	94541508	ENST00000317829	+	ENSG00000166025	AMOTL1	protein_coding	1450	chr11	95617459	95657459	ENST00000346299	-	ENSG00000087053	MTMR2	protein_coding	1550
chr11	102283775	102323775	ENST00000398136	-	ENSG00000152558	TMEM123	protein_coding	825	chr11	107879459	107919459	ENST00000393094	+	ENSG00000166266	CUL5	protein_coding	1625
chr11	107879459	107919459	ENST00000393094	+	ENSG00000166266	CUL5	protein_coding	1625	chr11	109964087	110004087	ENST00000278590	+	ENSG00000149289	ZC3H12C	protein_coding	1000
chr11	109964087	110004087	ENST00000278590	+	ENSG00000149289	ZC3H12C	protein_coding	1000	chr11	110127447	110167447	ENST00000343115	-	ENSG00000137710	RDX	protein_coding	1125
chr11	111473115	111513115	ENST00000304987	+	ENSG00000170145	SIK2	protein_coding	1050	chr11	111848033	111888033	ENST00000315253	+	ENSG00000150764	DIXDC1	protein_coding	1200
chr11	111848033	111888033	ENST00000315253	+	ENSG00000150764	DIXDC1	protein_coding	1200	chr11	112097111	112137111	ENST00000531673	+	ENSG00000150787	PTS	protein_coding	850
chr11	114271404	114311404	ENST00000544347	+	ENSG00000255663	RP11-212D19.4	protein_coding	1050	chr11	112097111	112137111	ENST00000531673	+	ENSG00000150787	PTS	protein_coding	850
chr11	116929153	116969153	ENST00000446921	-	ENSG00000160584	SIK3	protein_coding	1550	chr11	118307205	118347205	ENST00000534358	+	ENSG00000118058	MLL	protein_coding	1825
chr11	118307205	118347205	ENST00000534358	+	ENSG00000118058	MLL	protein_coding	1825	chr11	118621845	118661845	ENST00000264018	-	ENSG00000110367	DDX6	protein_coding	1525
chr11	120207787	120247787	ENST00000397843	+	ENSG00000196914	ARHGEF12	protein_coding	1300	chr11	120894781	120934781	ENST00000529397	+	ENSG00000154114	TBCEL	protein_coding	1075
chr11	122526383	122566383	ENST00000284273	+	ENSG00000154127	UBASH3B	protein_coding	1525	chr11	123025989	123065989	ENST00000448775	-	ENSG00000166250	CLMP	protein_coding	1525
chr11	128352205	128392205	ENST00000535549	-	ENSG00000134954	ETS1	protein_coding	1425	chr11	129109219	129149219	ENST00000525234	-	ENSG00000134909	ARHGAP32	protein_coding	1325
chr11	129939732	129979732	ENST00000532456	+	ENSG00000084234	APLP2	protein_coding	1925	chr11	129109219	129149219	ENST00000525234	-	ENSG00000134909	ARHGAP32	protein_coding	1325
chr11	131779938	131819938	ENST00000498764	+	ENSG00000182667	NTM	protein_coding	1600	chr11	129939732	129979732	ENST00000532456	+	ENSG00000084234	APLP2	protein_coding	1925
chr11	133938820	133978820	ENST00000299106	+	ENSG00000166086	JAM3	protein_coding	1075	chr11	131779938	131819938	ENST00000498764	+	ENSG00000182667	NTM	protein_coding	1600
chr12	458620	498620	ENST00000399788	-	ENSG00000073614	KDM5A	protein_coding	1200	chr12	861759	901759	ENST00000535572	+	ENSG00000060237	WNK1	protein_coding	1450
chr12	861759	901759	ENST00000535572	+	ENSG00000060237	WNK1	protein_coding	1450	chr12	1100404	1140404	ENST00000347735	+	ENSG00000082805	ERC1	protein_coding	1550
chr12	1639057	1679057	ENST00000539198	+	ENSG00000111186	WNT5B	protein_coding	1600	chr12	2073677	2113677	ENST00000280665	-	ENSG00000151065	DCP1B	protein_coding	875
chr12	2073677	2113677	ENST00000280665	-	ENSG00000151065	DCP1B	protein_coding	875	chr12	2162464	2202464	ENST00000335762	+	ENSG00000151067	CACNA1C	protein_coding	1625
chr12	4758273	4798273	ENST00000266544	+	ENSG00000139180	NDUFA9	protein_coding	1375	chr12	2162464	2202464	ENST00000335762	+	ENSG00000151067	CACNA1C	protein_coding	1625
chr12	11802788	11842788	ENST00000396373	+	ENSG00000139083	ETV6	protein_coding	1475	chr12	14518610	14558610	ENST00000539659	+	ENSG00000171681	ATF7IP	protein_coding	1100
chr12	14518610	14558610	ENST00000539659	+	ENSG00000171681	ATF7IP	protein_coding	1100	chr12	15902510	15942510	ENST00000281172	-	ENSG00000151491	EPS8	protein_coding	1625
chr12	19282648	19322648	ENST00000309364	+	ENSG00000052126	PLEKHA5	protein_coding	625	chr12	19592608	19632608	ENST00000398864	+	ENSG00000139154	AEBP2	protein_coding	1675
chr12	22778009	22818009	ENST00000266517	+	ENSG00000139163	ETNK1	protein_coding	725	chr12	25016009	25056009	ENST00000539282	-	ENSG00000060982	BCAT1	protein_coding	150
chr12	25016009	25056009	ENST00000539282	-	ENSG00000060982	BCAT1	protein_coding	150	chr12	25062393	25102393	ENST00000261192	-	ENSG00000060982	BCAT1	protein_coding	975
chr12	25363870	25403870	ENST00000557334	-	ENSG00000133703	KRAS	protein_coding	1275	chr12	25062393	25102393	ENST00000261192	-	ENSG00000060982	BCAT1	protein_coding	975
chr12	26111962	26151962	ENST00000381352	+	ENSG00000123094	RASSF8	protein_coding	1750	chr12	25363870	25403870	ENST00000557334	-	ENSG00000133703	KRAS	protein_coding	1275
chr12	27127327	27167327	ENST00000343028	-	ENSG00000064115	TM7SF3	protein_coding	800	chr12	27676364	27716364	ENST00000538433	+	ENSG00000110841	PPFIBP1	protein_coding	1725
chr12	29494086	29534086	ENST00000360150	-	ENSG00000087502	ERGIC2	protein_coding	1450	chr12	30808920	30848920	ENST00000256079	-	ENSG00000133704	IPO8	protein_coding	875
chr12	30808920	30848920	ENST00000256079	-	ENSG00000133704	IPO8	protein_coding	875	chr12	30867448	30907448	ENST00000454014	-	ENSG00000110888	CAPRIN2	protein_coding	850
chr12	31704031	31744031	ENST00000389082	-	ENSG00000170456	DENND5B	protein_coding	1150	chr12	32260085	32300085	ENST00000548411	+	ENSG00000151746	BICD1	protein_coding	650
chr12	42592151	42632151	ENST00000547254	-	ENSG00000015153	YAF2	protein_coding	800	chr12	42944157	42984157	ENST00000445766	-	ENSG00000139174	PRICKLE1	protein_coding	850
chr12	45609770	45649770	ENST00000426898	+	ENSG00000177119	ANO6	protein_coding	1475	chr12	46123448	46163448	ENST00000334344	+	ENSG00000189079	ARID2	protein_coding	1350
chr12	47473386	47513386	ENST00000546455	+	ENSG00000179715	PCED1B	protein_coding	850	chr12	48059844	48099844	ENST00000005386	-	ENSG00000005175	RPAP3	protein_coding	850
chr12	48059844	48099844	ENST00000005386	-	ENSG00000005175	RPAP3	protein_coding	850	chr12	48258823	48298823	ENST00000548664	-	ENSG00000111424	VDR	protein_coding	925
chr12	49311148	49351148	ENST00000398092	-	ENSG00000134287	ARF3	protein_coding	550	chr12	50061948	50101948	ENST00000550424	-	ENSG00000161791	FMNL3	protein_coding	1100
chr12	50061948	50101948	ENST00000550424	-	ENSG00000161791	FMNL3	protein_coding	1100	chr12	50576488	50616488	ENST00000552783	-	ENSG00000050405	LIMA1	protein_coding	2225
chr12	50576488	50616488	ENST00000552783	-	ENSG00000050405	LIMA1	protein_coding	2225	chr12	50637353	50677353	ENST00000549681	-	ENSG00000050405	LIMA1	protein_coding	1225
chr12	50794592	50834592	ENST00000293618	+	ENSG00000161813	LARP4	protein_coding	1425	chr12	50637353	50677353	ENST00000549681	-	ENSG00000050405	LIMA1	protein_coding	1225
chr12	51526926	51566926	ENST00000307660	-	ENSG00000135457	TFCP2	protein_coding	250	chr12	51984050	52024050	ENST00000546961	+	ENSG00000196876	SCN8A	protein_coding	1525
chr12	56915713	56955713	ENST00000262031	+	ENSG00000076067	RBMS2	protein_coding	1425	chr12	57522282	57562282	ENST00000243077	+	ENSG00000123384	LRP1	protein_coding	1575
chr12	57522282	57562282	ENST00000243077	+	ENSG00000123384	LRP1	protein_coding	1575	chr12	57784788	57824788	ENST00000347140	-	ENSG00000179912	R3HDM2	protein_coding	1350
chr12	59274303	59314303	ENST00000320743	-	ENSG00000139263	LRIG3	protein_coding	675	chr12	57784788	57824788	ENST00000347140	-	ENSG00000179912	R3HDM2	protein_coding	1350
chr12	62654119	62694119	ENST00000353364	+	ENSG00000135655	USP15	protein_coding	1650	chr12	62860597	62900597	ENST00000393630	+	ENSG00000061987	2013-12-02	protein_coding	1400
chr12	64238073	64278073	ENST00000355086	+	ENSG00000196935	SRGAP1	protein_coding	1425	chr12	64798130	64838130	ENST00000332707	+	ENSG00000184575	XPOT	protein_coding	775
chr12	64798130	64838130	ENST00000332707	+	ENSG00000184575	XPOT	protein_coding	775	chr12	64845660	64885660	ENST00000331710	+	ENSG00000183735	TBK1	protein_coding	1125
chr12	65004293	65044293	ENST00000283172	+	ENSG00000153179	RASSF3	protein_coding	875	chr12	65113227	65153227	ENST00000258145	-	ENSG00000135677	GNS	protein_coding	50
chr12	65563351	65603351	ENST00000308330	+	ENSG00000174106	LEMD3	protein_coding	1400	chr12	65672423	65712423	ENST00000308259	+	ENSG00000174099	MSRB3	protein_coding	1375
chr12	67663061	67703061	ENST00000545606	+	ENSG00000111530	CAND1	protein_coding	1650	chr12	69004619	69044619	ENST00000250559	+	ENSG00000127314	RAP1B	protein_coding	1600
chr12	69004619	69044619	ENST00000250559	+	ENSG00000127314	RAP1B	protein_coding	1600	chr12	69864129	69904129	ENST00000299293	+	ENSG00000166225	FRS2	protein_coding	1475
chr12	69864129	69904129	ENST00000299293	+	ENSG00000166225	FRS2	protein_coding	1475	chr12	70636774	70676774	ENST00000552231	+	ENSG00000111596	CNOT2	protein_coding	1100
chr12	71833550	71873550	ENST00000266674	+	ENSG00000139292	LGR5	protein_coding	975	chr12	72017749	72057749	ENST00000378743	-	ENSG00000133858	ZFC3H1	protein_coding	1000
chr12	72666463	72706463	ENST00000261180	+	ENSG00000072657	TRHDE	protein_coding	1525	chr12	72017749	72057749	ENST00000378743	-	ENSG00000133858	ZFC3H1	protein_coding	1000
chr12	76438813	76478813	ENST00000261182	-	ENSG00000187109	NAP1L1	protein_coding	1775	chr12	76913589	76953589	ENST00000261183	-	ENSG00000091039	OSBPL8	protein_coding	1750
chr12	76913589	76953589	ENST00000261183	-	ENSG00000091039	OSBPL8	protein_coding	1750	chr12	77157368	77197368	ENST00000426126	+	ENSG00000186908	ZDHHC17	protein_coding	1500
chr12	77419360	77459360	ENST00000322886	-	ENSG00000165891	E2F7	protein_coding	1275	chr12	77157368	77197368	ENST00000426126	+	ENSG00000186908	ZDHHC17	protein_coding	1500
chr12	80083924	80123924	ENST00000551995	+	ENSG00000258048	RP11-530C5.1	lincRNA	1175	chr12	80289240	80329240	ENST00000437004	-	ENSG00000058272	PPP1R12A	protein_coding	1575
chr12	82712175	82752175	ENST00000552377	-	ENSG00000133773	CCDC59	protein_coding	675	chr12	80289240	80329240	ENST00000437004	-	ENSG00000058272	PPP1R12A	protein_coding	1575
chr12	88495993	88535993	ENST00000552810	-	ENSG00000198707	CEP290	protein_coding	850	chr12	88536073	88576073	ENST00000547034	+	ENSG00000139324	TMTC3	protein_coding	950
chr12	88934628	88974628	ENST00000347404	-	ENSG00000049130	KITLG	protein_coding	1300	chr12	88536073	88576073	ENST00000547034	+	ENSG00000139324	TMTC3	protein_coding	950
chr12	90063077	90103077	ENST00000551310	-	ENSG00000070961	ATP2B1	protein_coding	1800	chr12	88934628	88974628	ENST00000347404	-	ENSG00000049130	KITLG	protein_coding	1300
chr12	93283107	93323107	ENST00000322349	-	ENSG00000102189	EEA1	protein_coding	725	chr12	95357436	95397436	ENST00000552205	-	ENSG00000184752	NDUFA12	protein_coding	950
chr12	95357436	95397436	ENST00000552205	-	ENSG00000184752	NDUFA12	protein_coding	950	chr12	95571258	95611258	ENST00000451107	-	ENSG00000180263	FGD6	protein_coding	900
chr12	95867296	95907296	ENST00000535095	+	ENSG00000111142	METAP2	protein_coding	1425	chr12	95571258	95611258	ENST00000451107	-	ENSG00000180263	FGD6	protein_coding	900
chr12	96252747	96292747	ENST00000552085	+	ENSG00000139343	SNRPF	protein_coding	1100	chr12	96588160	96628160	ENST00000228741	+	ENSG00000111145	ELK3	protein_coding	1900
chr12	96588160	96628160	ENST00000228741	+	ENSG00000111145	ELK3	protein_coding	1900	chr12	96754338	96794338	ENST00000261211	-	ENSG00000059758	CDK17	protein_coding	2000
chr12	97301001	97341001	ENST00000266742	+	ENSG00000139350	NEDD1	protein_coding	1500	chr12	96754338	96794338	ENST00000261211	-	ENSG00000059758	CDK17	protein_coding	2000
chr12	99038919	99078919	ENST00000551964	+	ENSG00000120868	APAF1	protein_coding	725	chr12	100496626	100536626	ENST00000279907	-	ENSG00000111647	UHRF1BP1L	protein_coding	1600
chr12	100496626	100536626	ENST00000279907	-	ENSG00000111647	UHRF1BP1L	protein_coding	1600	chr12	100660918	100700918	ENST00000549687	+	ENSG00000136021	SCYL2	protein_coding	1425
chr12	102184716	102224716	ENST00000299314	-	ENSG00000111670	GNPTAB	protein_coding	625	chr12	102271129	102311129	ENST00000258534	+	ENSG00000136048	DRAM1	protein_coding	1675
chr12	104194975	104234975	ENST00000392876	-	ENSG00000111696	NT5DC3	protein_coding	1375	chr12	104458235	104498235	ENST00000229330	+	ENSG00000111727	HCFC2	protein_coding	1125
chr12	104458235	104498235	ENST00000229330	+	ENSG00000111727	HCFC2	protein_coding	1125	chr12	104680460	104720460	ENST00000503506	+	ENSG00000198431	TXNRD1	protein_coding	2050
chr12	105501492	105541492	ENST00000332180	+	ENSG00000136051	KIAA1033	protein_coding	1300	chr12	105590016	105630016	ENST00000258530	-	ENSG00000136044	APPL2	protein_coding	1375
chr12	105724414	105764414	ENST00000443585	+	ENSG00000235162	C12orf75	protein_coding	1300	chr12	105590016	105630016	ENST00000258530	-	ENSG00000136044	APPL2	protein_coding	1375
chr12	106493811	106533811	ENST00000261402	-	ENSG00000074590	NUAK1	protein_coding	1925	chr12	105724414	105764414	ENST00000443585	+	ENSG00000235162	C12orf75	protein_coding	1300
chr12	109085372	109125372	ENST00000261401	-	ENSG00000110880	CORO1C	protein_coding	1550	chr12	109211366	109251366	ENST00000551165	-	ENSG00000084112	SSH1	protein_coding	1150
chr12	110437328	110477328	ENST00000261739	+	ENSG00000076513	ANKRD13A	protein_coding	1375	chr12	110718921	110758921	ENST00000308664	+	ENSG00000174437	ATP2A2	protein_coding	975
chr12	111997480	112037480	ENST00000550104	-	ENSG00000204842	ATXN2	protein_coding	1400	chr12	112506826	112546826	ENST00000261745	-	ENSG00000111300	NAA25	protein_coding	1100
chr12	112506826	112546826	ENST00000261745	-	ENSG00000111300	NAA25	protein_coding	1100	chr12	112856713	112896713	ENST00000392597	+	ENSG00000179295	PTPN11	protein_coding	1350
chr12	116675143	116715143	ENST00000281928	-	ENSG00000123066	MED13L	protein_coding	1850	chr12	117348761	117388761	ENST00000309909	+	ENSG00000174989	FBXW8	protein_coding	1425
chr12	118770750	118810750	ENST00000392533	-	ENSG00000135090	TAOK3	protein_coding	1775	chr12	117348761	117388761	ENST00000309909	+	ENSG00000174989	FBXW8	protein_coding	1425
chr12	120663574	120703574	ENST00000228307	-	ENSG00000089159	PXN	protein_coding	1875	chr12	120972154	121012154	ENST00000325954	+	ENSG00000022840	RNF10	protein_coding	1450
chr12	121302174	121342174	ENST00000353487	-	ENSG00000157837	SPPL3	protein_coding	900	chr12	120972154	121012154	ENST00000325954	+	ENSG00000022840	RNF10	protein_coding	1450
chr12	121750265	121790265	ENST00000261819	-	ENSG00000089053	ANAPC5	protein_coding	675	chr12	121302174	121342174	ENST00000353487	-	ENSG00000157837	SPPL3	protein_coding	900
chr12	122516628	122556628	ENST00000319080	+	ENSG00000175727	MLXIP	protein_coding	1400	chr12	122867179	122907179	ENST00000537178	-	ENSG00000130779	CLIP1	protein_coding	1125
chr12	123978265	124018265	ENST00000376874	-	ENSG00000188026	RILPL1	protein_coding	2575	chr12	122867179	122907179	ENST00000537178	-	ENSG00000130779	CLIP1	protein_coding	1125
chr12	132195634	132235634	ENST00000261674	+	ENSG00000061936	SFSWAP	protein_coding	1450	chr12	132434505	132474505	ENST00000537902	+	ENSG00000183495	EP400	protein_coding	1275
chr13	19406107	19446107	ENST00000457997	-	ENSG00000206192	ANKRD20A9P	pseudogene	75	chr13	20317082	20357082	ENST00000492741	-	ENSG00000121390	PSPC1	protein_coding	1200
chr13	20317082	20357082	ENST00000492741	-	ENSG00000121390	PSPC1	protein_coding	1200	chr13	20397776	20437776	ENST00000337963	-	ENSG00000132950	ZMYM5	protein_coding	1250
chr13	20532810	20572810	ENST00000456228	+	ENSG00000121741	ZMYM2	protein_coding	1350	chr13	20397776	20437776	ENST00000337963	-	ENSG00000132950	ZMYM5	protein_coding	1250
chr13	24144509	24184509	ENST00000248484	+	ENSG00000127863	TNFRSF19	protein_coding	1475	chr13	25046948	25086948	ENST00000381989	-	ENSG00000102699	PARP4	protein_coding	200
chr13	25046948	25086948	ENST00000381989	-	ENSG00000102699	PARP4	protein_coding	200	chr13	25822147	25862147	ENST00000381801	-	ENSG00000139505	MTMR6	protein_coding	850
chr13	25822147	25862147	ENST00000381801	-	ENSG00000139505	MTMR6	protein_coding	850	chr13	25875662	25915662	ENST00000381736	+	ENSG00000139496	NUPL1	protein_coding	1225
chr13	26756398	26796398	ENST00000468480	-	ENSG00000127870	RNF6	protein_coding	975	chr13	27131840	27171840	ENST00000361042	+	ENSG00000132970	WASF3	protein_coding	1475
chr13	27706033	27746033	ENST00000282344	-	ENSG00000152484	USP12	protein_coding	1650	chr13	27131840	27171840	ENST00000361042	+	ENSG00000132970	WASF3	protein_coding	1475
chr13	28712643	28752643	ENST00000503791	+	ENSG00000152520	PAN3	protein_coding	1525	chr13	27706033	27746033	ENST00000282344	-	ENSG00000152484	USP12	protein_coding	1650
chr13	30129825	30169825	ENST00000380752	-	ENSG00000139514	SLC7A1	protein_coding	1250	chr13	30384821	30424821	ENST00000380680	-	ENSG00000122042	UBL3	protein_coding	1850
chr13	30841621	30881621	ENST00000380615	-	ENSG00000102781	KATNAL1	protein_coding	1525	chr13	31191920	31231920	ENST00000255304	+	ENSG00000132952	USPL1	protein_coding	1400
chr13	33072970	33112970	ENST00000505213	-	ENSG00000244754	N4BP2L2	protein_coding	1475	chr13	31191920	31231920	ENST00000255304	+	ENSG00000132952	USPL1	protein_coding	1400
chr13	36880934	36920934	ENST00000451493	-	ENSG00000133104	SPG20	protein_coding	1200	chr13	37593850	37633850	ENST00000360252	-	ENSG00000102710	FAM48A	protein_coding	1525
chr13	38404562	38444562	ENST00000447043	-	ENSG00000133107	TRPC4	protein_coding	1725	chr13	37593850	37633850	ENST00000360252	-	ENSG00000102710	FAM48A	protein_coding	1525
chr13	40137308	40177308	ENST00000379589	-	ENSG00000183722	LHFP	protein_coding	700	chr13	41595576	41635576	ENST00000405737	-	ENSG00000120690	ELF1	protein_coding	1250
chr13	41595576	41635576	ENST00000405737	-	ENSG00000120690	ELF1	protein_coding	1250	chr13	41885341	41925341	ENST00000379367	+	ENSG00000172766	NAA16	protein_coding	1600
chr13	42614176	42654176	ENST00000540693	+	ENSG00000102780	DGKH	protein_coding	1900	chr13	42846289	42886289	ENST00000025301	+	ENSG00000023516	AKAP11	protein_coding	975
chr13	43597339	43637339	ENST00000379221	+	ENSG00000120675	DNAJC15	protein_coding	1125	chr13	42846289	42886289	ENST00000025301	+	ENSG00000023516	AKAP11	protein_coding	975
chr13	45110701	45150701	ENST00000458659	-	ENSG00000102804	TSC22D1	protein_coding	1325	chr13	45694650	45734650	ENST00000340473	+	ENSG00000188342	GTF2F2	protein_coding	1925
chr13	45694650	45734650	ENST00000340473	+	ENSG00000188342	GTF2F2	protein_coding	1925	chr13	46039060	46079060	ENST00000349995	+	ENSG00000136152	COG3	protein_coding	675
chr13	46586894	46626894	ENST00000282007	-	ENSG00000123200	ZC3H13	protein_coding	1375	chr13	47127303	47167303	ENST00000311191	+	ENSG00000136141	LRCH1	protein_coding	1125
chr13	47127303	47167303	ENST00000311191	+	ENSG00000136141	LRCH1	protein_coding	1125	chr13	47431169	47471169	ENST00000543956	-	ENSG00000102468	HTR2A	protein_coding	575
chr13	48535462	48575462	ENST00000378645	-	ENSG00000136143	SUCLA2	protein_coding	1400	chr13	48877887	48917887	ENST00000525036	+	ENSG00000139687	RB1	protein_coding	1325
chr13	49550048	49590048	ENST00000492622	+	ENSG00000102531	FNDC3A	protein_coding	1400	chr13	48877887	48917887	ENST00000525036	+	ENSG00000139687	RB1	protein_coding	1325
chr13	50327057	50367057	ENST00000261667	-	ENSG00000102753	KPNA3	protein_coding	1500	chr13	50659856	50699856	ENST00000425586	-	ENSG00000231607	DLEU2	lincRNA	625
chr13	51987343	52027343	ENST00000398119	-	ENSG00000102786	INTS6	protein_coding	650	chr13	52158644	52198644	ENST00000298125	+	ENSG00000139668	WDFY2	protein_coding	1700
chr13	67764468	67804468	ENST00000544246	-	ENSG00000184226	PCDH9	protein_coding	2300	chr13	73356197	73396197	ENST00000326291	+	ENSG00000083535	PIBF1	protein_coding	900
chr13	73356197	73396197	ENST00000326291	+	ENSG00000083535	PIBF1	protein_coding	900	chr13	74668394	74708394	ENST00000377666	-	ENSG00000118922	KLF12	protein_coding	1225
chr13	76016250	76056250	ENST00000377625	-	ENSG00000136111	TBC1D4	protein_coding	1750	chr13	76209946	76249946	ENST00000533305	+	ENSG00000136153	LMO7	protein_coding	1875
chr13	77861179	77901179	ENST00000360084	-	ENSG00000005810	MYCBP2	protein_coding	1350	chr13	76209946	76249946	ENST00000533305	+	ENSG00000136153	LMO7	protein_coding	1875
chr13	79940350	79980350	ENST00000438737	-	ENSG00000139746	RBM26	protein_coding	825	chr13	80055287	80095287	ENST00000218652	+	ENSG00000102471	NDFIP2	protein_coding	975
chr13	95913687	95953687	ENST00000412704	-	ENSG00000125257	ABCC4	protein_coding	725	chr13	96329411	96369411	ENST00000376795	+	ENSG00000102580	DNAJC3	protein_coding	1275
chr13	97873688	97913688	ENST00000397601	+	ENSG00000139793	MBNL2	protein_coding	1425	chr13	98628886	98668886	ENST00000490680	+	ENSG00000065150	IPO5	protein_coding	1100
chr13	98628886	98668886	ENST00000490680	+	ENSG00000065150	IPO5	protein_coding	1100	chr13	98795434	98835434	ENST00000376581	+	ENSG00000152767	FARP1	protein_coding	1250
chr13	99896769	99936769	ENST00000494576	+	ENSG00000134882	UBAC2	protein_coding	450	chr13	100153671	100193671	ENST00000376387	+	ENSG00000125304	TM9SF2	protein_coding	1425
chr13	102104966	102144966	ENST00000376180	+	ENSG00000198542	ITGBL1	protein_coding	1600	chr13	103249353	103289353	ENST00000376065	+	ENSG00000134900	TPP2	protein_coding	1250
chr13	103249353	103289353	ENST00000376065	+	ENSG00000134900	TPP2	protein_coding	1250	chr13	103451399	103491399	ENST00000257336	+	ENSG00000134897	BIVM	protein_coding	950
chr13	110919496	110959496	ENST00000397198	-	ENSG00000187498	COL4A1	protein_coding	1775	chr13	111805994	111845994	ENST00000491775	+	ENSG00000102606	ARHGEF7	protein_coding	1150
chr13	113862552	113902552	ENST00000375441	+	ENSG00000139842	CUL4A	protein_coding	925	chr13	114145310	114185310	ENST00000434316	+	ENSG00000150403	TMCO3	protein_coding	400
chr13	114527046	114567046	ENST00000357389	-	ENSG00000183087	GAS6	protein_coding	1775	chr13	114858086	114898086	ENST00000334062	-	ENSG00000185989	RASA3	protein_coding	925
chr14	20841580	20881580	ENST00000262715	-	ENSG00000129566	TEP1	protein_coding	725	chr14	21697653	21737653	ENST00000336053	-	ENSG00000092199	HNRNPC	protein_coding	850
chr14	30356948	30396948	ENST00000331968	-	ENSG00000184304	PRKD1	protein_coding	1125	chr14	31028329	31068329	ENST00000206595	+	ENSG00000092140	G2E3	protein_coding	1625
chr14	31028329	31068329	ENST00000206595	+	ENSG00000092140	G2E3	protein_coding	1625	chr14	31455607	31495607	ENST00000355683	-	ENSG00000196792	STRN3	protein_coding	825
chr14	32546173	32586173	ENST00000556611	+	ENSG00000100852	ARHGAP5	protein_coding	1325	chr14	32963477	33003477	ENST00000554410	+	ENSG00000151320	AKAP6	protein_coding	1925
chr14	35059389	35099389	ENST00000362031	-	ENSG00000129515	SNX6	protein_coding	750	chr14	35304853	35344853	ENST00000358716	-	ENSG00000198604	BAZ1A	protein_coding	1050
chr14	35304853	35344853	ENST00000358716	-	ENSG00000198604	BAZ1A	protein_coding	1050	chr14	35451163	35491163	ENST00000556994	+	ENSG00000100883	SRP54	protein_coding	1700
chr14	39532732	39572732	ENST00000307712	-	ENSG00000100934	SEC23A	protein_coding	1225	chr14	35451163	35491163	ENST00000556994	+	ENSG00000100883	SRP54	protein_coding	1700
chr14	45431411	45471411	ENST00000361577	+	ENSG00000198718	FAM179B	protein_coding	1425	chr14	50658276	50698276	ENST00000216373	-	ENSG00000100485	SOS2	protein_coding	1125
chr14	50658276	50698276	ENST00000216373	-	ENSG00000100485	SOS2	protein_coding	1125	chr14	50959327	50999327	ENST00000013125	-	ENSG00000012983	MAP4K5	protein_coding	1450
chr14	52118576	52158576	ENST00000395718	+	ENSG00000139926	FRMD6	protein_coding	1650	chr14	50959327	50999327	ENST00000013125	-	ENSG00000012983	MAP4K5	protein_coding	1450
chr14	55738021	55778021	ENST00000313833	+	ENSG00000178974	FBXO34	protein_coding	850	chr14	55838576	55878576	ENST00000247178	-	ENSG00000126775	ATG14	protein_coding	1200
chr14	56046925	56086925	ENST00000413890	+	ENSG00000126777	KTN1	protein_coding	1550	chr14	55838576	55878576	ENST00000247178	-	ENSG00000126775	ATG14	protein_coding	1200
chr14	57695726	57735726	ENST00000413566	-	ENSG00000070367	EXOC5	protein_coding	1050	chr14	58724857	58764857	ENST00000554218	-	ENSG00000139971	C14orf37	protein_coding	650
chr14	58724857	58764857	ENST00000554218	-	ENSG00000139971	C14orf37	protein_coding	650	chr14	58765103	58805103	ENST00000355431	+	ENSG00000032219	ARID4A	protein_coding	1325
chr14	59655364	59695364	ENST00000556596	+	ENSG00000100592	DAAM1	protein_coding	650	chr14	58765103	58805103	ENST00000355431	+	ENSG00000032219	ARID4A	protein_coding	1325
chr14	60558629	60598629	ENST00000317623	+	ENSG00000126773	C14orf135	protein_coding	1950	chr14	61201480	61241480	ENST00000261245	+	ENSG00000020426	MNAT1	protein_coding	1650
chr14	62162258	62202258	ENST00000337138	+	ENSG00000100644	HIF1A	protein_coding	1175	chr14	61201480	61241480	ENST00000261245	+	ENSG00000020426	MNAT1	protein_coding	1650
chr14	63670832	63710832	ENST00000557447	+	ENSG00000126785	RHOJ	protein_coding	1000	chr14	63970092	64010092	ENST00000337537	-	ENSG00000154001	PPP2R5E	protein_coding	1375
chr14	65381203	65421203	ENST00000542227	+	ENSG00000125954	CHURC1-FNTB	protein_coding	1350	chr14	65529105	65569105	ENST00000341653	-	ENSG00000125952	MAX	protein_coding	1350
chr14	67707826	67747826	ENST00000261681	+	ENSG00000072415	MPP5	protein_coding	1750	chr14	67786508	67826508	ENST00000554087	-	ENSG00000100554	ATP6V1D	protein_coding	1100
chr14	69406157	69446157	ENST00000193403	-	ENSG00000072110	ACTN1	protein_coding	1575	chr14	69579843	69619843	ENST00000341516	-	ENSG00000139990	DCAF5	protein_coding	1450
chr14	71787166	71827166	ENST00000555989	+	ENSG00000197555	SIPA1L1	protein_coding	1650	chr14	73453920	73493920	ENST00000556143	-	ENSG00000165861	ZFYVE1	protein_coding	600
chr14	73453920	73493920	ENST00000556143	-	ENSG00000165861	ZFYVE1	protein_coding	600	chr14	73525144	73565144	ENST00000261973	+	ENSG00000119707	RBM25	protein_coding	1225
chr14	74187001	74227001	ENST00000286523	-	ENSG00000156030	C14orf43	protein_coding	1175	chr14	73525144	73565144	ENST00000261973	+	ENSG00000119707	RBM25	protein_coding	1225
chr14	75039306	75079306	ENST00000556359	-	ENSG00000119681	LTBP2	protein_coding	1600	chr14	75139818	75179818	ENST00000356357	-	ENSG00000119682	KIAA0317	protein_coding	1750
chr14	75139818	75179818	ENST00000356357	-	ENSG00000119682	KIAA0317	protein_coding	1750	chr14	75230069	75270069	ENST00000552421	+	ENSG00000119596	YLPM1	protein_coding	900
chr14	75603334	75643334	ENST00000303575	-	ENSG00000170348	TMED10	protein_coding	1775	chr14	75894419	75934419	ENST00000419727	+	ENSG00000140044	JDP2	protein_coding	1525
chr14	76618259	76658259	ENST00000554375	+	ENSG00000089916	C14orf118	protein_coding	1125	chr14	76662251	76702251	ENST00000556372	+	ENSG00000089916	C14orf118	protein_coding	1225
chr14	77564654	77604654	ENST00000557752	+	ENSG00000259164	RP11-463C8.4	protein_coding	1375	chr14	78043116	78083116	ENST00000216484	-	ENSG00000100596	SPTLC2	protein_coding	1975
chr14	78043116	78083116	ENST00000216484	-	ENSG00000100596	SPTLC2	protein_coding	1975	chr14	78174446	78214446	ENST00000557431	+	ENSG00000119705	SLIRP	protein_coding	825
chr14	78187550	78227550	ENST00000556428	-	ENSG00000100603	SNW1	protein_coding	1025	chr14	78043116	78083116	ENST00000216484	-	ENSG00000100596	SPTLC2	protein_coding	1975
chr14	81647575	81687575	ENST00000434192	-	ENSG00000165417	GTF2A1	protein_coding	1025	chr14	81960205	82000205	ENST00000336735	-	ENSG00000071537	SEL1L	protein_coding	725
chr14	88981077	89021077	ENST00000556564	-	ENSG00000070778	PTPN21	protein_coding	450	chr14	89029253	89069253	ENST00000359301	+	ENSG00000100722	ZC3H14	protein_coding	875
chr14	89290968	89330968	ENST00000345383	+	ENSG00000165533	TTC8	protein_coding	1625	chr14	89029253	89069253	ENST00000359301	+	ENSG00000100722	ZC3H14	protein_coding	875
chr14	90045493	90085493	ENST00000555353	-	ENSG00000053254	FOXN3	protein_coding	575	chr14	89290968	89330968	ENST00000345383	+	ENSG00000165533	TTC8	protein_coding	1625
chr14	91936824	91976824	ENST00000554390	-	ENSG00000100796	SMEK1	protein_coding	1575	chr14	92374167	92414167	ENST00000342058	-	ENSG00000140092	FBLN5	protein_coding	1250
chr14	93260576	93300576	ENST00000163416	+	ENSG00000066455	GOLGA5	protein_coding	1200	chr14	93759438	93799438	ENST00000298896	-	ENSG00000011114	BTBD7	protein_coding	1300
chr14	95584347	95624347	ENST00000526495	-	ENSG00000100697	DICER1	protein_coding	1650	chr14	96505661	96545661	ENST00000555004	+	ENSG00000227051	C14orf132	protein_coding	1850
chr14	96505661	96545661	ENST00000555004	+	ENSG00000227051	C14orf132	protein_coding	1850	chr14	96790207	96830207	ENST00000359933	-	ENSG00000066739	ATG2B	protein_coding	925
chr14	96790207	96830207	ENST00000359933	-	ENSG00000066739	ATG2B	protein_coding	925	chr14	96968710	97008710	ENST00000216277	+	ENSG00000090060	PAPOLA	protein_coding	1525
chr14	99907216	99947216	ENST00000331768	-	ENSG00000183576	SETD3	protein_coding	1175	chr14	99947761	99987761	ENST00000555049	+	ENSG00000090061	CCNK	protein_coding	1500
chr14	100705322	100745322	ENST00000262238	+	ENSG00000100811	YY1	protein_coding	1475	chr14	100803142	100843142	ENST00000355338	-	ENSG00000140105	WARS	protein_coding	675
chr14	102276140	102316140	ENST00000350249	+	ENSG00000078304	PPP2R5C	protein_coding	1475	chr14	102430865	102470865	ENST00000360184	+	ENSG00000197102	DYNC1H1	protein_coding	1650
chr14	102605840	102645840	ENST00000557485	+	ENSG00000140153	WDR20	protein_coding	1350	chr14	102430865	102470865	ENST00000360184	+	ENSG00000197102	DYNC1H1	protein_coding	1650
chr14	103483799	103523799	ENST00000361246	-	ENSG00000198752	CDC42BPB	protein_coding	1575	chr14	104095514	104135514	ENST00000348520	+	ENSG00000126214	KLC1	protein_coding	1450
chr15	22833395	22873395	ENST00000283645	+	ENSG00000153575	TUBGCP5	protein_coding	1000	chr15	26068870	26108870	ENST00000555815	-	ENSG00000206190	ATP10A	protein_coding	1375
chr15	30074706	30114706	ENST00000346128	-	ENSG00000104067	TJP1	protein_coding	1425	chr15	31243807	31283807	ENST00000435680	-	ENSG00000166912	MTMR10	protein_coding	1275
chr15	31243807	31283807	ENST00000435680	-	ENSG00000166912	MTMR10	protein_coding	1275	chr15	31619058	31659058	ENST00000307145	+	ENSG00000169926	KLF13	protein_coding	1350
chr15	34291377	34331377	ENST00000306730	-	ENSG00000169857	AVEN	protein_coding	1375	chr15	31619058	31659058	ENST00000307145	+	ENSG00000169926	KLF13	protein_coding	1350
chr15	37353504	37393504	ENST00000340545	-	ENSG00000134138	MEIS2	protein_coding	1175	chr15	38544527	38584527	ENST00000299084	+	ENSG00000166068	SPRED1	protein_coding	1400
chr15	40173093	40213093	ENST00000561100	-	ENSG00000166073	GPR176	protein_coding	2125	chr15	40226347	40266347	ENST00000559624	+	ENSG00000128829	EIF2AK4	protein_coding	1100
chr15	41368552	41408552	ENST00000361937	-	ENSG00000128908	INO80	protein_coding	1150	chr15	41952610	41992610	ENST00000545763	+	ENSG00000174197	MGA	protein_coding	975
chr15	41952610	41992610	ENST00000545763	+	ENSG00000174197	MGA	protein_coding	975	chr15	42525861	42565861	ENST00000389834	-	ENSG00000103978	TMEM87A	protein_coding	1575
chr15	42525861	42565861	ENST00000389834	-	ENSG00000103978	TMEM87A	protein_coding	1575	chr15	42709730	42749730	ENST00000263805	-	ENSG00000103994	ZFP106	protein_coding	950
chr15	43358311	43398311	ENST00000546274	-	ENSG00000159459	UBR1	protein_coding	1250	chr15	43425722	43465722	ENST00000260403	+	ENSG00000137842	TMEM62	protein_coding	725
chr15	43745369	43785369	ENST00000382044	-	ENSG00000067369	TP53BP1	protein_coding	1400	chr15	43425722	43465722	ENST00000260403	+	ENSG00000137842	TMEM62	protein_coding	725
chr15	44447450	44487450	ENST00000451277	-	ENSG00000171877	FRMD5	protein_coding	1200	chr15	44580927	44620927	ENST00000559222	+	ENSG00000166734	CASC4	protein_coding	1250
chr15	44915876	44955876	ENST00000558319	-	ENSG00000104133	SPG11	protein_coding	725	chr15	44580927	44620927	ENST00000559222	+	ENSG00000166734	CASC4	protein_coding	1250
chr15	45879549	45919549	ENST00000564080	+	ENSG00000260170	RP11-96O20.4	protein_coding	1225	chr15	44915876	44955876	ENST00000558319	-	ENSG00000104133	SPG11	protein_coding	725
chr15	48898046	48938046	ENST00000316623	-	ENSG00000166147	FBN1	protein_coding	1700	chr15	49298760	49338760	ENST00000559471	-	ENSG00000138593	SECISBP2L	protein_coding	1475
chr15	49715293	49755293	ENST00000267843	+	ENSG00000140285	FGF7	protein_coding	1100	chr15	49298760	49338760	ENST00000559471	-	ENSG00000138593	SECISBP2L	protein_coding	1475
chr15	50939012	50979012	ENST00000313478	-	ENSG00000092439	TRPM7	protein_coding	1400	chr15	51018005	51058005	ENST00000261854	-	ENSG00000138600	SPPL2A	protein_coding	1875
chr15	51200869	51240869	ENST00000561441	+	ENSG00000081014	AP4E1	protein_coding	1025	chr15	51018005	51058005	ENST00000261854	-	ENSG00000138600	SPPL2A	protein_coding	1875
chr15	52781247	52821247	ENST00000399231	-	ENSG00000197535	MYO5A	protein_coding	1525	chr15	52931569	52971569	ENST00000566768	-	ENSG00000047346	FAM214A	protein_coding	1350
chr15	56169329	56209329	ENST00000338963	-	ENSG00000069869	NEDD4	protein_coding	1000	chr15	56495483	56535483	ENST00000423270	-	ENSG00000181827	RFX7	protein_coding	1100
chr15	57210821	57250821	ENST00000438423	+	ENSG00000140262	TCF12	protein_coding	1500	chr15	56495483	56535483	ENST00000423270	-	ENSG00000181827	RFX7	protein_coding	1100
chr15	57998910	58038910	ENST00000482852	+	ENSG00000255529	POLR2M	protein_coding	1125	chr15	57210821	57250821	ENST00000438423	+	ENSG00000140262	TCF12	protein_coding	1500
chr15	59002177	59042177	ENST00000260408	-	ENSG00000137845	ADAM10	protein_coding	1525	chr15	59185852	59225852	ENST00000380516	-	ENSG00000137776	SLTM	protein_coding	925
chr15	59185852	59225852	ENST00000380516	-	ENSG00000137776	SLTM	protein_coding	925	chr15	59279854	59319854	ENST00000348370	+	ENSG00000157450	RNF111	protein_coding	725
chr15	59625099	59665099	ENST00000288235	-	ENSG00000157483	MYO1E	protein_coding	1350	chr15	59279854	59319854	ENST00000348370	+	ENSG00000157450	RNF111	protein_coding	725
chr15	60650941	60690941	ENST00000559818	-	ENSG00000182718	ANXA2	protein_coding	2325	chr15	61481518	61521518	ENST00000335670	-	ENSG00000069667	RORA	protein_coding	1200
chr15	64086141	64126141	ENST00000561400	-	ENSG00000103657	HERC1	protein_coding	1450	chr15	64680003	64720003	ENST00000261884	+	ENSG00000103671	TRIP4	protein_coding	350
chr15	64680003	64720003	ENST00000261884	+	ENSG00000103671	TRIP4	protein_coding	350	chr15	65134082	65174082	ENST00000502574	+	ENSG00000249240	AC069368.3	protein_coding	1250
chr15	66044631	66084631	ENST00000564674	-	ENSG00000174485	DENND4A	protein_coding	1225	chr15	65134082	65174082	ENST00000502574	+	ENSG00000249240	AC069368.3	protein_coding	1250
chr15	67507533	67547533	ENST00000542650	-	ENSG00000103591	AAGAB	protein_coding	975	chr15	68346517	68386517	ENST00000249636	+	ENSG00000033800	PIAS1	protein_coding	1350
chr15	68346517	68386517	ENST00000249636	+	ENSG00000033800	PIAS1	protein_coding	1350	chr15	68684501	68724501	ENST00000423218	-	ENSG00000137809	ITGA11	protein_coding	1500
chr15	69073234	69113234	ENST00000465139	-	ENSG00000140350	ANP32A	protein_coding	1325	chr15	68684501	68724501	ENST00000423218	-	ENSG00000137809	ITGA11	protein_coding	1500
chr15	71015932	71055932	ENST00000322954	-	ENSG00000137831	UACA	protein_coding	1400	chr15	72628322	72668322	ENST00000379915	-	ENSG00000260729	RP11-106M3.2	processed_transcript	875
chr15	72628322	72668322	ENST00000379915	-	ENSG00000260729	RP11-106M3.2	processed_transcript	875	chr15	72766667	72806667	ENST00000379887	+	ENSG00000166233	ARIH1	protein_coding	1600
chr15	73886475	73926475	ENST00000351217	-	ENSG00000156642	NPTN	protein_coding	1850	chr15	74287014	74327014	ENST00000395135	+	ENSG00000140464	PML	protein_coding	1300
chr15	75704045	75744045	ENST00000394947	-	ENSG00000169375	SIN3A	protein_coding	875	chr15	75831630	75871630	ENST00000306726	-	ENSG00000169410	PTPN9	protein_coding	1625
chr15	76135622	76175622	ENST00000338677	+	ENSG00000140367	UBE2Q2	protein_coding	1675	chr15	75831630	75871630	ENST00000306726	-	ENSG00000169410	PTPN9	protein_coding	1625
chr15	76563813	76603813	ENST00000560044	-	ENSG00000140374	ETFA	protein_coding	1175	chr15	76135622	76175622	ENST00000338677	+	ENSG00000140367	UBE2Q2	protein_coding	1675
chr15	77672486	77712486	ENST00000560626	-	ENSG00000173517	PEAK1	protein_coding	2000	chr15	77712754	77752754	ENST00000560498	+	ENSG00000140382	HMG20A	protein_coding	1325
chr15	78730531	78770531	ENST00000258886	+	ENSG00000136381	IREB2	protein_coding	1225	chr15	79603487	79643487	ENST00000424155	+	ENSG00000166557	TMED3	protein_coding	1275
chr15	79603487	79643487	ENST00000424155	+	ENSG00000166557	TMED3	protein_coding	1275	chr15	80351910	80391910	ENST00000261749	+	ENSG00000086666	ZFAND6	protein_coding	1825
chr15	80351910	80391910	ENST00000261749	+	ENSG00000086666	ZFAND6	protein_coding	1825	chr15	80987644	81027644	ENST00000258884	+	ENSG00000136379	FAM108C1	protein_coding	1225
chr15	80987644	81027644	ENST00000258884	+	ENSG00000136379	FAM108C1	protein_coding	1225	chr15	81071684	81111684	ENST00000220244	+	ENSG00000103888	KIAA1199	protein_coding	1500
chr15	83696106	83736106	ENST00000261721	-	ENSG00000064726	BTBD1	protein_coding	1250	chr15	85074026	85114026	ENST00000339094	-	ENSG00000189136	UBE2Q2P1	pseudogene	925
chr15	85074026	85114026	ENST00000339094	-	ENSG00000189136	UBE2Q2P1	pseudogene	925	chr15	85219947	85259947	ENST00000268220	-	ENSG00000140612	SEC11A	protein_coding	975
chr15	85219947	85259947	ENST00000268220	-	ENSG00000140612	SEC11A	protein_coding	975	chr15	85291866	85331866	ENST00000560079	+	ENSG00000166716	ZNF592	protein_coding	900
chr15	85923818	85963818	ENST00000559362	+	ENSG00000170776	AKAP13	protein_coding	1650	chr15	85291866	85331866	ENST00000560079	+	ENSG00000166716	ZNF592	protein_coding	900
chr15	89630690	89670690	ENST00000569411	+	ENSG00000140526	ABHD2	protein_coding	575	chr15	90931450	90971450	ENST00000268182	+	ENSG00000140575	IQGAP1	protein_coding	2075
chr15	90931450	90971450	ENST00000268182	+	ENSG00000140575	IQGAP1	protein_coding	2075	chr15	91073157	91113157	ENST00000420329	+	ENSG00000140577	CRTC3	protein_coding	1200
chr15	93426526	93466526	ENST00000556722	+	ENSG00000173575	CHD2	protein_coding	950	chr15	91073157	91113157	ENST00000420329	+	ENSG00000140577	CRTC3	protein_coding	1200
chr15	99192200	99232200	ENST00000268035	+	ENSG00000140443	IGF1R	protein_coding	1350	chr15	100105622	100145622	ENST00000560493	+	ENSG00000068305	MEF2A	protein_coding	1550
chr15	101142739	101182739	ENST00000332783	+	ENSG00000183475	ASB7	protein_coding	850	chr15	101752137	101792137	ENST00000254190	-	ENSG00000131873	CHSY1	protein_coding	1675
chr16	3890727	3930727	ENST00000262367	-	ENSG00000005339	CREBBP	protein_coding	950	chr16	4126186	4166186	ENST00000294016	-	ENSG00000162104	ADCY9	protein_coding	475
chr16	4857303	4897303	ENST00000321919	-	ENSG00000140632	GLYR1	protein_coding	425	chr16	4126186	4166186	ENST00000294016	-	ENSG00000162104	ADCY9	protein_coding	475
chr16	11851123	11891123	ENST00000355758	-	ENSG00000122299	ZC3H7A	protein_coding	1125	chr16	11969939	12009939	ENST00000420576	-	ENSG00000103342	GSPT1	protein_coding	1250
chr16	14684133	14724133	ENST00000341484	-	ENSG00000140694	PARN	protein_coding	675	chr16	15528152	15568152	ENST00000300006	+	ENSG00000166780	C16orf45	protein_coding	1675
chr16	15528152	15568152	ENST00000300006	+	ENSG00000166780	C16orf45	protein_coding	1675	chr16	15697023	15737023	ENST00000396368	-	ENSG00000166783	KIAA0430	protein_coding	975
chr16	16043434	16083434	ENST00000349029	+	ENSG00000103222	ABCC1	protein_coding	1550	chr16	15697023	15737023	ENST00000396368	-	ENSG00000166783	KIAA0430	protein_coding	975
chr16	17524738	17564738	ENST00000261381	-	ENSG00000103489	XYLT1	protein_coding	1950	chr16	16043434	16083434	ENST00000349029	+	ENSG00000103222	ABCC1	protein_coding	1550
chr16	19125324	19165324	ENST00000564808	+	ENSG00000261427	CTD-2349B8.1	protein_coding	800	chr16	17524738	17564738	ENST00000261381	-	ENSG00000103489	XYLT1	protein_coding	1950
chr16	21491765	21531765	ENST00000522841	-	ENSG00000180747	CTD-2547E10.2	pseudogene	1225	chr16	22018959	22058959	ENST00000567004	+	ENSG00000185716	C16orf52	protein_coding	1375
chr16	23120591	23160591	ENST00000219689	-	ENSG00000103404	USP31	protein_coding	1125	chr16	22018959	22058959	ENST00000567004	+	ENSG00000185716	C16orf52	protein_coding	1375
chr16	24741016	24781016	ENST00000315183	+	ENSG00000090905	TNRC6A	protein_coding	1600	chr16	24986987	25026987	ENST00000573449	-	ENSG00000140750	ARHGAP17	protein_coding	1175
chr16	27325234	27365234	ENST00000395762	+	ENSG00000077238	IL4R	protein_coding	900	chr16	28183190	28223190	ENST00000304658	-	ENSG00000169180	XPO6	protein_coding	850
chr16	30710462	30750462	ENST00000262518	+	ENSG00000080603	SRCAP	protein_coding	450	chr16	31885079	31925079	ENST00000300870	+	ENSG00000185947	ZNF267	protein_coding	1425
chr16	47455185	47495185	ENST00000544001	-	ENSG00000129636	ITFG1	protein_coding	1300	chr16	48278207	48318207	ENST00000285737	+	ENSG00000102910	LONP2	protein_coding	1250
chr16	47495034	47535034	ENST00000566037	+	ENSG00000102893	PHKB	protein_coding	1125	chr16	48278207	48318207	ENST00000285737	+	ENSG00000102910	LONP2	protein_coding	1250
chr16	50099852	50139852	ENST00000299192	+	ENSG00000155393	HEATR3	protein_coding	1050	chr16	50186829	50226829	ENST00000436909	+	ENSG00000121274	PAPD5	protein_coding	1700
chr16	50362845	50402845	ENST00000394688	-	ENSG00000166164	BRD7	protein_coding	1500	chr16	50186829	50226829	ENST00000436909	+	ENSG00000121274	PAPD5	protein_coding	1700
chr16	50775961	50815961	ENST00000540145	+	ENSG00000083799	CYLD	protein_coding	1275	chr16	50362845	50402845	ENST00000394688	-	ENSG00000166164	BRD7	protein_coding	1500
chr16	53088945	53128945	ENST00000447540	+	ENSG00000177200	CHD9	protein_coding	1275	chr16	53737875	53777875	ENST00000471389	+	ENSG00000140718	FTO	protein_coding	1425
chr16	57023397	57063397	ENST00000539881	+	ENSG00000140853	NLRC5	protein_coding	800	chr16	57220203	57260203	ENST00000394420	+	ENSG00000159579	RSPRY1	protein_coding	950
chr16	57796935	57836935	ENST00000541240	-	ENSG00000140859	KIFC3	protein_coding	925	chr16	58191824	58231824	ENST00000262506	-	ENSG00000070770	CSNK2A2	protein_coding	875
chr16	58623790	58663790	ENST00000317147	-	ENSG00000125107	CNOT1	protein_coding	1025	chr16	58191824	58231824	ENST00000262506	-	ENSG00000070770	CSNK2A2	protein_coding	875
chr16	67063019	67103019	ENST00000561924	+	ENSG00000067955	CBFB	protein_coding	1200	chr16	67475140	67515140	ENST00000290949	-	ENSG00000159720	ATP6V0D1	protein_coding	1450
chr16	69221032	69261032	ENST00000336278	+	ENSG00000168807	SNTB2	protein_coding	700	chr16	69458428	69498428	ENST00000512062	+	ENSG00000103018	CYB5B	protein_coding	1350
chr16	69458428	69498428	ENST00000512062	+	ENSG00000103018	CYB5B	protein_coding	1350	chr16	69598997	69638997	ENST00000426654	+	ENSG00000102908	NFAT5	protein_coding	1500
chr16	70557691	70597691	ENST00000302516	+	ENSG00000189091	SF3B3	protein_coding	1275	chr16	69598997	69638997	ENST00000426654	+	ENSG00000102908	NFAT5	protein_coding	1500
chr16	71803104	71843104	ENST00000299980	-	ENSG00000166747	AP1G1	protein_coding	1300	chr16	70557691	70597691	ENST00000302516	+	ENSG00000189091	SF3B3	protein_coding	1275
chr16	73053597	73093597	ENST00000397992	-	ENSG00000140836	ZFHX3	protein_coding	1900	chr16	71803104	71843104	ENST00000299980	-	ENSG00000166747	AP1G1	protein_coding	1300
chr16	74601012	74641012	ENST00000205061	-	ENSG00000090863	GLG1	protein_coding	900	chr16	73053597	73093597	ENST00000397992	-	ENSG00000140836	ZFHX3	protein_coding	1900
chr16	81478775	81518775	ENST00000537098	+	ENSG00000153815	CMIP	protein_coding	1025	chr16	82660408	82700408	ENST00000566620	+	ENSG00000140945	CDH13	protein_coding	400
chr16	84611683	84651683	ENST00000262428	-	ENSG00000103187	COTL1	protein_coding	1250	chr16	84733584	84773584	ENST00000219473	+	ENSG00000103194	USP10	protein_coding	1725
chr16	87485651	87525651	ENST00000268616	-	ENSG00000140948	ZCCHC14	protein_coding	750	chr16	89574811	89614811	ENST00000268704	+	ENSG00000197912	SPG7	protein_coding	1400
chr17	843010	883010	ENST00000336868	-	ENSG00000167693	NXN	protein_coding	1100	chr17	1263672	1303672	ENST00000264335	-	ENSG00000108953	YWHAE	protein_coding	1525
chr17	2167065	2207065	ENST00000263073	-	ENSG00000070366	SMG6	protein_coding	850	chr17	2496504	2536504	ENST00000576586	+	ENSG00000007168	PAFAH1B1	protein_coding	1800
chr17	4006314	4046314	ENST00000574474	-	ENSG00000074755	ZZEF1	protein_coding	1225	chr17	4736683	4776683	ENST00000355280	+	ENSG00000141503	MINK1	protein_coding	1200
chr17	4736683	4776683	ENST00000355280	+	ENSG00000141503	MINK1	protein_coding	1200	chr17	5185558	5225558	ENST00000408982	+	ENSG00000029725	RABEP1	protein_coding	1250
chr17	8339179	8379179	ENST00000299734	+	ENSG00000166579	NDEL1	protein_coding	1200	chr17	5185558	5225558	ENST00000408982	+	ENSG00000029725	RABEP1	protein_coding	1250
chr17	11924141	11964141	ENST00000353533	+	ENSG00000065559	MAP2K4	protein_coding	1275	chr17	13465244	13505244	ENST00000284110	-	ENSG00000153976	HS3ST3A1	protein_coding	1300
chr17	13465244	13505244	ENST00000284110	-	ENSG00000153976	HS3ST3A1	protein_coding	1300	chr17	14204400	14244400	ENST00000360954	+	ENSG00000125430	HS3ST3B1	protein_coding	1175
chr17	15903049	15943049	ENST00000395886	+	ENSG00000011295	TTC19	protein_coding	875	chr17	16945859	16985859	ENST00000577514	+	ENSG00000133030	MPRIP	protein_coding	1225
chr17	16945859	16985859	ENST00000577514	+	ENSG00000133030	MPRIP	protein_coding	1225	chr17	17835736	17875736	ENST00000579586	-	ENSG00000175662	TOM1L2	protein_coding	1425
chr17	19140389	19180389	ENST00000584633	+	ENSG00000072134	EPN2	protein_coding	850	chr17	20058651	20098651	ENST00000582063	+	ENSG00000128487	SPECC1	protein_coding	750
chr17	20058651	20098651	ENST00000582063	+	ENSG00000128487	SPECC1	protein_coding	750	chr17	20907073	20947073	ENST00000579645	-	ENSG00000124422	USP22	protein_coding	1575
chr17	26369182	26409182	ENST00000407008	+	ENSG00000087095	NLK	protein_coding	850	chr17	26989109	27029109	ENST00000314616	+	ENSG00000109111	SUPT6H	protein_coding	1300
chr17	26989109	27029109	ENST00000314616	+	ENSG00000109111	SUPT6H	protein_coding	1300	chr17	27129857	27169857	ENST00000583522	-	ENSG00000173065	FAM222B	protein_coding	1150
chr17	27129857	27169857	ENST00000583522	-	ENSG00000173065	FAM222B	protein_coding	1150	chr17	27238789	27278789	ENST00000332830	-	ENSG00000109118	PHF12	protein_coding	1275
chr17	27717482	27757482	ENST00000583121	+	ENSG00000160551	TAOK1	protein_coding	1825	chr17	27238789	27278789	ENST00000332830	-	ENSG00000109118	PHF12	protein_coding	1275
chr17	28217191	28257191	ENST00000579040	-	ENSG00000141298	SSH2	protein_coding	700	chr17	28579012	28619012	ENST00000261714	-	ENSG00000108578	BLMH	protein_coding	1200
chr17	28579012	28619012	ENST00000261714	-	ENSG00000108578	BLMH	protein_coding	1200	chr17	28804380	28844380	ENST00000225724	+	ENSG00000108587	GOSR1	protein_coding	1075
chr17	29421945	29461945	ENST00000358273	+	ENSG00000196712	NF1	protein_coding	1450	chr17	28804380	28844380	ENST00000225724	+	ENSG00000108587	GOSR1	protein_coding	1075
chr17	30188784	30228784	ENST00000261708	-	ENSG00000108651	UTP6	protein_coding	225	chr17	30535321	30575321	ENST00000584852	+	ENSG00000126858	RHOT1	protein_coding	1750
chr17	31164195	31204195	ENST00000318217	-	ENSG00000176658	MYO1D	protein_coding	1450	chr17	30535321	30575321	ENST00000584852	+	ENSG00000126858	RHOT1	protein_coding	1750
chr17	34900781	34940781	ENST00000495023	+	ENSG00000005955	GGNBP2	protein_coding	1675	chr17	35306175	35346175	ENST00000225402	+	ENSG00000108270	AATF	protein_coding	875
chr17	36584662	36624662	ENST00000431231	+	ENSG00000225485	ARHGAP23	protein_coding	700	chr17	37567539	37607539	ENST00000300651	-	ENSG00000125686	MED1	protein_coding	975
chr17	37567539	37607539	ENST00000300651	-	ENSG00000125686	MED1	protein_coding	975	chr17	37617764	37657764	ENST00000584632	+	ENSG00000167258	CDK12	protein_coding	1050
chr17	38375556	38415556	ENST00000583268	+	ENSG00000171475	WIPF2	protein_coding	1150	chr17	37617764	37657764	ENST00000584632	+	ENSG00000167258	CDK12	protein_coding	1050
chr17	40035272	40075272	ENST00000353196	-	ENSG00000131473	ACLY	protein_coding	1025	chr17	40129715	40169715	ENST00000457167	-	ENSG00000168259	DNAJC7	protein_coding	825
chr17	40388725	40428725	ENST00000415845	-	ENSG00000173757	STAT5B	protein_coding	675	chr17	40500449	40540449	ENST00000389272	-	ENSG00000168610	STAT3	protein_coding	1150
chr17	40500449	40540449	ENST00000389272	-	ENSG00000168610	STAT3	protein_coding	1150	chr17	40610862	40650862	ENST00000546249	+	ENSG00000033627	ATP6V0A1	protein_coding	1900
chr17	41322511	41362511	ENST00000422280	+	ENSG00000188554	NBR1	protein_coding	1075	chr17	41561331	41601331	ENST00000540306	+	ENSG00000067596	DHX8	protein_coding	1050
chr17	42540802	42580802	ENST00000335500	-	ENSG00000186566	GPATCH8	protein_coding	1300	chr17	42936993	42976993	ENST00000426333	-	ENSG00000108883	EFTUD2	protein_coding	900
chr17	42936993	42976993	ENST00000426333	-	ENSG00000108883	EFTUD2	protein_coding	900	chr17	43138680	43178680	ENST00000258960	+	ENSG00000136448	NMT1	protein_coding	1075
chr17	43354414	43394414	ENST00000344686	-	ENSG00000006062	MAP3K14	protein_coding	675	chr17	43138680	43178680	ENST00000258960	+	ENSG00000136448	NMT1	protein_coding	1075
chr17	44230272	44270272	ENST00000572904	-	ENSG00000120071	KANSL1	protein_coding	1200	chr17	43354414	43394414	ENST00000344686	-	ENSG00000006062	MAP3K14	protein_coding	675
chr17	46627634	46667634	ENST00000498678	-	ENSG00000120093	HOXB3	protein_coding	1950	chr17	47074774	47114774	ENST00000290341	+	ENSG00000159217	IGF2BP1	protein_coding	625
chr17	47074774	47114774	ENST00000290341	+	ENSG00000159217	IGF2BP1	protein_coding	625	chr17	47399835	47439835	ENST00000362063	-	ENSG00000198740	ZNF652	protein_coding	1450
chr17	47399835	47439835	ENST00000362063	-	ENSG00000198740	ZNF652	protein_coding	1450	chr17	47715596	47755596	ENST00000504102	-	ENSG00000121067	SPOP	protein_coding	850
chr17	47715596	47755596	ENST00000504102	-	ENSG00000121067	SPOP	protein_coding	850	chr17	47865917	47905917	ENST00000259021	+	ENSG00000136504	KAT7	protein_coding	1050
chr17	48712218	48752218	ENST00000285238	+	ENSG00000108846	ABCC3	protein_coding	2000	chr17	49158226	49198226	ENST00000357122	-	ENSG00000008294	SPAG9	protein_coding	1575
[truncated: 745 more rows]

## Sheet: TM
Gene 1 Chromosome	Gene 1 Start (analysis region)	Gene 1 End (analysis region)	Gene 1 Ensembl Transcript ID	Gene 1 Strand	Gene 1 Ensembl Gene ID	Gene 1 Gene Symbol	Gene 1 Ensembl Biotype	Gene 1 Elongation Rate	Gene 2 Chromosome	Gene 2 Start (analysis region)	Gene 2 End (analysis region)	Gene 2 Ensembl Transcript ID	Gene 2 Strand	Gene 2 Ensembl Gene ID	Gene 2 Gene Symbol	Gene 2 Ensembl Biotype	Gene 2 Elongation Rate
[truncated: 1,648 more rows]

[truncated: 2 more sheets: K562, MCF7]
