# Supplementary material for: Rate of elongation by RNA polymerase II is associated with specific gene features and epigenetic modifications
Source: HighWire-hosted journal article supplement (doi:10.1101/gr.171405.113), 2014-04-08
Supplement: Supplemental_Table6.xlsx [file Supplemental_Table6.xlsx]

## Sheet: K562 repl 1
ChIA-PET seg1 chr	ChIA-PET seg1 start	ChIA-PET seg1 end	Gene 1 chr	Gene 1 start	Gene 1 end	Gene 1 Transcript ID	Gene 1 Strand	Gene 1 Elongation Rate	ChIA-PET seg2 chr	ChIA-PET seg2 start	ChIA-PET seg2 end	Gene 2 chr	Gene 2 start	Gene 2 end	Gene 2 Transcript ID	Gene 2 Strand	Gene 2 Elongation Rate
chr6	158243442	158245618	chr6	158244281	158244282	ENST00000539592	+	1925	chr6	161412032	161413556	chr6	161412759	161412760	ENST00000366919	+	1575
chr3	196465094	196468298	chr3	196466728	196466729	ENST00000327134	+	1575	chr3	196591776	196596008	chr3	196594727	196594728	ENST00000323460	+	1675
chr6	119255727	119258203	chr6	119256326	119256327	ENST00000316316	-	1175	chr6	119400226	119402388	chr6	119400343	119400344	ENST00000522284	-	525
chr10	97838555	97859010	chr10	97849994	97849995	ENST00000427846	-	1350	chr10	97880529	97894933	chr10	97889829	97889830	ENST00000563195	+	1150
chr8	109259359	109262285	chr8	109260993	109260994	ENST00000220849	-	1750	chr8	110346380	110348055	chr8	110346613	110346614	ENST00000239690	-	1250
chr8	109259698	109262225	chr8	109260993	109260994	ENST00000220849	-	1750	chr8	109454638	109457185	chr8	109455853	109455854	ENST00000220853	+	1275
chr15	85254161	85260882	chr15	85259946	85259947	ENST00000268220	-	1050	chr15	85289368	85295750	chr15	85291866	85291867	ENST00000560079	+	1500
chr2	170425992	170432740	chr2	170430382	170430383	ENST00000453153	-	825	chr2	170436874	170443150	chr2	170440850	170440851	ENST00000260970	+	1875
chr6	119398174	119401168	chr6	119400343	119400344	ENST00000522284	-	525	chr6	119668507	119671059	chr6	119670925	119670926	ENST00000368468	-	1325
chr14	55657821	55660879	chr14	55658395	55658396	ENST00000247191	-	1225	chr14	55735073	55739609	chr14	55738021	55738022	ENST00000313833	+	1225
chr4	39638936	39642499	chr4	39640709	39640710	ENST00000295958	-	600	chr4	39697838	39702458	chr4	39699664	39699665	ENST00000261427	+	1300
chr2	170440782	170443108	chr2	170440850	170440851	ENST00000260970	+	1875	chr2	170550910	170553354	chr2	170550998	170550999	ENST00000498202	+	1475
chr7	135193095	135197068	chr7	135194874	135194875	ENST00000541284	-	1925	chr7	135241029	135244889	chr7	135242667	135242668	ENST00000285968	+	900
chr14	55737342	55739119	chr14	55738021	55738022	ENST00000313833	+	1225	chr14	56046136	56048438	chr14	56046925	56046926	ENST00000413890	+	1800
chr4	39697682	39700796	chr4	39699664	39699665	ENST00000261427	+	1300	chr4	39977568	39979753	chr4	39979575	39979576	ENST00000503396	-	1450
chr4	39698867	39700371	chr4	39699664	39699665	ENST00000261427	+	1300	chr4	40058008	40059606	chr4	40058446	40058447	ENST00000261435	+	1200
chr1	241796724	241805103	chr1	241803700	241803701	ENST00000331838	-	1200	chr1	242008052	242013159	chr1	242011482	242011483	ENST00000366548	+	600
chr2	9562842	9565237	chr2	9563697	9563698	ENST00000238112	+	425	chr2	9694299	9697191	chr2	9695916	9695917	ENST00000310823	-	1325
chr7	138914979	138917662	chr7	138916231	138916232	ENST00000473989	+	1350	chr7	139042467	139046412	chr7	139044627	139044628	ENST00000545899	+	1600
chr8	41654853	41657297	chr8	41655139	41655140	ENST00000289734	-	1250	chr8	41908668	41911452	chr8	41909504	41909505	ENST00000396930	-	1775
chr4	39977798	39981404	chr4	39979575	39979576	ENST00000503396	-	1450	chr4	40055932	40060227	chr4	40058446	40058447	ENST00000261435	+	1200
chr1	222790149	222792584	chr1	222791428	222791429	ENST00000344922	+	625	chr1	222885363	222887404	chr1	222886525	222886526	ENST00000541237	-	1200
chr4	1280840	1286312	chr4	1283639	1283640	ENST00000303400	+	1250	chr4	1338111	1343712	chr4	1341104	1341105	ENST00000389851	+	825
chr14	96828300	96831729	chr14	96830206	96830207	ENST00000359933	-	975	chr14	96966894	96970584	chr14	96968710	96968711	ENST00000216277	+	1550
chr3	49375112	49379681	chr3	49377503	49377504	ENST00000265560	-	150	chr3	49446166	49452291	chr3	49449634	49449635	ENST00000418115	-	1500
chr2	75873250	75876057	chr2	75873920	75873921	ENST00000358788	+	1850	chr2	75936626	75939886	chr2	75938114	75938115	ENST00000321027	-	1025
chr12	64796628	64799812	chr12	64798130	64798131	ENST00000332707	+	600	chr12	65002415	65005896	chr12	65004293	65004294	ENST00000283172	+	1550
chr6	42531766	42533940	chr6	42531800	42531801	ENST00000372899	+	1250	chr6	42712336	42716048	chr6	42714696	42714697	ENST00000394167	+	300
chr2	65453202	65456355	chr2	65454887	65454888	ENST00000260641	+	1700	chr2	65661861	65667395	chr2	65663864	65663865	ENST00000377977	+	725
chr2	65454805	65456630	chr2	65454887	65454888	ENST00000260641	+	1700	chr2	65658181	65661085	chr2	65659770	65659771	ENST00000440972	-	1475
chr8	53624816	53627483	chr8	53626996	53626997	ENST00000521611	-	1400	chr8	54753343	54757526	chr8	54756117	54756118	ENST00000355221	-	1600
chr4	144256474	144260869	chr4	144257915	144257916	ENST00000262995	+	1175	chr4	144433151	144436933	chr4	144434616	144434617	ENST00000283131	+	1475
chr7	30322727	30325189	chr7	30323923	30323924	ENST00000323037	+	1400	chr7	30633928	30636255	chr7	30634358	30634359	ENST00000426529	-	375
chr17	61627562	61629542	chr17	61627822	61627823	ENST00000310827	+	1375	chr17	61850975	61852538	chr17	61851223	61851224	ENST00000578681	+	1300
chr12	49759658	49762377	chr12	49760367	49760368	ENST00000550997	+	925	chr12	49960316	49963047	chr12	49962155	49962156	ENST00000551063	+	800
chr2	200775740	200777525	chr2	200776029	200776030	ENST00000491721	+	1725	chr2	200817345	200822180	chr2	200820544	200820545	ENST00000435773	+	1200
chr4	106066580	106068131	chr4	106067032	106067033	ENST00000305737	+	1675	chr4	106393738	106396130	chr4	106395237	106395238	ENST00000341695	-	900
chr8	54754942	54758152	chr8	54756117	54756118	ENST00000355221	-	1600	chr8	54933404	54936388	chr8	54935088	54935089	ENST00000521604	-	1325
chr15	91071878	91075498	chr15	91073157	91073158	ENST00000420329	+	1175	chr15	91258815	91261847	chr15	91260558	91260559	ENST00000355112	+	400
chr8	42127284	42130012	chr8	42128820	42128821	ENST00000520810	+	1025	chr8	42395816	42397894	chr8	42397068	42397069	ENST00000342228	-	1250
chr4	106393199	106396342	chr4	106395237	106395238	ENST00000341695	-	900	chr4	106628328	106631625	chr4	106629941	106629942	ENST00000394730	+	1525
chr8	61428381	61431496	chr8	61429416	61429417	ENST00000262646	+	1850	chr8	61588452	61591900	chr8	61591337	61591338	ENST00000307121	+	1825
chr3	15640333	15645950	chr3	15643337	15643338	ENST00000321169	-	600	chr3	15899409	15904490	chr3	15901277	15901278	ENST00000399451	-	1600
chr11	77530309	77533546	chr11	77532062	77532063	ENST00000308488	-	1450	chr11	77704751	77707196	chr11	77705723	77705724	ENST00000534064	-	1175
chr1	165735886	165744990	chr1	165738416	165738417	ENST00000367881	-	1400	chr1	165791702	165805629	chr1	165796768	165796769	ENST00000367879	+	1625
chr6	105404250	105406790	chr6	105404923	105404924	ENST00000345080	+	1400	chr6	105849543	105852087	chr6	105850958	105850959	ENST00000369110	-	1300
chr5	43063463	43067998	chr5	43067520	43067521	ENST00000503152	-	650	chr5	43119333	43125586	chr5	43120985	43120986	ENST00000515326	+	1900
chr4	154264809	154268391	chr4	154265801	154265802	ENST00000240488	+	1175	chr4	154384656	154389105	chr4	154387498	154387499	ENST00000440693	+	1350
chr3	43327640	43330625	chr3	43328004	43328005	ENST00000454177	+	1075	chr3	43731199	43733951	chr3	43733085	43733086	ENST00000413397	-	675
chr1	206807619	206811968	chr1	206809073	206809074	ENST00000489878	+	1950	chr1	206856211	206859672	chr1	206858289	206858290	ENST00000294981	+	1300
chr10	5853439	5857708	chr10	5855511	5855512	ENST00000380191	-	1075	chr10	5926443	5936823	chr10	5931535	5931536	ENST00000397269	+	850
chr1	184722993	184726139	chr1	184724046	184724047	ENST00000318130	-	1025	chr1	185013897	185016469	chr1	185014496	185014497	ENST00000367510	+	1775
chr1	165796719	165798432	chr1	165796768	165796769	ENST00000367879	+	1625	chr1	167188997	167191733	chr1	167190066	167190067	ENST00000367866	+	1525
chr2	208392948	208398724	chr2	208394461	208394462	ENST00000430624	+	650	chr2	208487423	208493541	chr2	208490651	208490652	ENST00000461419	-	1650
chr5	43067084	43070080	chr5	43067520	43067521	ENST00000503152	-	650	chr5	43601534	43603658	chr5	43602825	43602826	ENST00000264663	+	1850
chr2	153031056	153034207	chr2	153032505	153032506	ENST00000263904	-	500	chr2	153571978	153575897	chr2	153574494	153574495	ENST00000410080	-	1525
chr7	44529526	44531460	chr7	44530478	44530479	ENST00000355451	-	1225	chr7	44642568	44646415	chr7	44646171	44646172	ENST00000439616	+	375
chr1	22108270	22111873	chr1	22110098	22110099	ENST00000308271	-	1525	chr1	22261097	22265705	chr1	22263789	22263790	ENST00000374695	-	825
chr10	94351725	94353301	chr10	94353043	94353044	ENST00000260731	+	1650	chr10	94589609	94592418	chr10	94590935	94590936	ENST00000371547	+	1625
chr2	48540677	48543829	chr2	48541776	48541777	ENST00000413569	+	1925	chr2	48665802	48669252	chr2	48667737	48667738	ENST00000431614	+	950
chr9	114933746	114940463	chr9	114937687	114937688	ENST00000374270	-	1875	chr9	115091866	115097241	chr9	115095946	115095947	ENST00000374257	-	1450
chr1	226495420	226500064	chr1	226497569	226497570	ENST00000366808	-	1450	chr1	226594005	226597004	chr1	226595773	226595774	ENST00000366794	-	1175
chr2	113031252	113036924	chr2	113033171	113033172	ENST00000409871	+	325	chr2	113235926	113242226	chr2	113239731	113239732	ENST00000233336	+	425
chr16	278007	280657	chr16	279461	279462	ENST00000337351	-	375	chr16	401253	402982	chr16	402672	402673	ENST00000481769	-	700
chr10	12083225	12085486	chr10	12085022	12085023	ENST00000397053	-	1550	chr10	12236374	12239309	chr10	12237965	12237966	ENST00000281141	+	1275
chr10	35377865	35383094	chr10	35379569	35379570	ENST00000374742	-	1200	chr10	35412073	35418081	chr10	35415719	35415720	ENST00000474362	+	1750
chr7	7220424	7222400	chr7	7222178	7222179	ENST00000419721	+	1350	chr7	7606398	7608085	chr7	7606503	7606504	ENST00000340080	+	1175
chr7	129707549	129715456	chr7	129710350	129710351	ENST00000335420	+	625	chr7	129841333	129847033	chr7	129845337	129845338	ENST00000397622	-	1075
chr20	48330393	48333901	chr20	48330414	48330415	ENST00000371711	-	1750	chr20	48429132	48431566	chr20	48429250	48429251	ENST00000417961	+	1250
chr1	22262266	22264700	chr1	22263789	22263790	ENST00000374695	-	825	chr1	22378495	22380572	chr1	22379120	22379121	ENST00000400259	+	1650
chr9	94875730	94878651	chr9	94877689	94877690	ENST00000486910	-	750	chr9	95055011	95057658	chr9	95056037	95056038	ENST00000443024	-	750
chr5	64856480	64860667	chr5	64858997	64858998	ENST00000396679	-	1200	chr5	64917199	64921181	chr5	64920543	64920544	ENST00000399438	+	875
chr2	58272245	58275889	chr2	58273729	58273730	ENST00000412104	+	1550	chr2	58464232	58469335	chr2	58468506	58468507	ENST00000449070	-	1475
chr11	32913171	32916144	chr11	32914724	32914725	ENST00000399302	+	1575	chr11	33182605	33184521	chr11	33183010	33183011	ENST00000323959	-	1075
chr12	45608238	45611148	chr12	45609770	45609771	ENST00000426898	+	1825	chr12	46119877	46124655	chr12	46123448	46123449	ENST00000334344	+	1700
chr5	64858723	64860628	chr5	64858997	64858998	ENST00000396679	-	1200	chr5	65017877	65020314	chr5	65018861	65018862	ENST00000506816	-	1175
chr11	32914066	32915835	chr11	32914724	32914725	ENST00000399302	+	1575	chr11	33278115	33280779	chr11	33278218	33278219	ENST00000525975	+	1650
chr15	49101837	49104427	chr15	49103337	49103338	ENST00000380950	-	1525	chr15	49910988	49914617	chr15	49913127	49913128	ENST00000299338	-	650
chr9	26891080	26895841	chr9	26892801	26892802	ENST00000333916	-	1550	chr9	26945501	26948974	chr9	26947460	26947461	ENST00000397292	-	1200
chr5	64916603	64920832	chr5	64920543	64920544	ENST00000399438	+	875	chr5	65016694	65020557	chr5	65018861	65018862	ENST00000506816	-	1175
chr5	64919165	64922724	chr5	64920543	64920544	ENST00000399438	+	875	chr5	65220758	65223686	chr5	65222303	65222304	ENST00000284037	+	1225
chr3	169897189	169899613	chr3	169899536	169899537	ENST00000466189	-	1300	chr3	169939919	169942653	chr3	169940153	169940154	ENST00000295797	+	1525
chr2	32233185	32238105	chr2	32236104	32236105	ENST00000490459	-	1350	chr2	32388775	32395245	chr2	32390933	32390934	ENST00000379343	+	1050
chr15	35838148	35839922	chr15	35838368	35838369	ENST00000256538	-	1450	chr15	37391125	37393697	chr15	37393503	37393504	ENST00000340545	-	1550
chr2	189148121	189153367	chr2	189152417	189152418	ENST00000434418	-	1125	chr2	189154784	189162424	chr2	189156396	189156397	ENST00000409843	+	1525
chr5	65017324	65019764	chr5	65018861	65018862	ENST00000506816	-	1175	chr5	65220517	65223204	chr5	65222303	65222304	ENST00000284037	+	1225
chr4	56410839	56413778	chr4	56413304	56413305	ENST00000513440	-	1325	chr4	56501227	56505067	chr4	56502864	56502865	ENST00000515325	-	1150
chr4	56411581	56413941	chr4	56413304	56413305	ENST00000513440	-	1325	chr4	57300856	57302618	chr4	57301780	57301781	ENST00000264220	-	1350
chr7	99154460	99156596	chr7	99156291	99156292	ENST00000486324	+	1750	chr7	99515467	99517004	chr7	99516727	99516728	ENST00000447480	-	1900
chr7	148394593	148399059	chr7	148395006	148395007	ENST00000409469	+	1900	chr7	148577011	148583485	chr7	148581412	148581413	ENST00000483012	-	1700
chr3	183351621	183357865	chr3	183353356	183353357	ENST00000242810	+	1125	chr3	183413516	183418081	chr3	183415606	183415607	ENST00000421660	+	950
chr6	34662945	34666396	chr6	34664635	34664636	ENST00000374026	-	1375	chr6	34758284	34762755	chr6	34759857	34759858	ENST00000192788	+	1325
chr11	33180160	33183951	chr11	33183010	33183011	ENST00000323959	-	1075	chr11	33277482	33283147	chr11	33278218	33278219	ENST00000525975	+	1650
chr5	96141925	96145850	chr5	96143802	96143803	ENST00000296754	-	475	chr5	96265867	96272606	chr5	96271168	96271169	ENST00000231368	+	1575
chr1	89456055	89458767	chr1	89458603	89458604	ENST00000260508	-	1450	chr1	89988699	89992602	chr1	89990395	89990396	ENST00000449440	+	1275
chr2	32388440	32390986	chr2	32390933	32390934	ENST00000379343	+	1050	chr2	32579691	32583834	chr2	32582096	32582097	ENST00000421745	+	1725
chr5	172407950	172412283	chr5	172410760	172410761	ENST00000519374	+	1325	chr5	172481493	172486157	chr5	172483355	172483356	ENST00000296953	+	1150
chr9	101555483	101562112	chr9	101559246	101559247	ENST00000375019	-	950	chr9	101568669	101573087	chr9	101569981	101569982	ENST00000375011	+	825
chr1	224300372	224302965	chr1	224301789	224301790	ENST00000366862	+	1250	chr1	224620010	224622203	chr1	224622000	224622001	ENST00000414423	-	1275
chr1	224301518	224303239	chr1	224301789	224301790	ENST00000366862	+	1250	chr1	224517881	224519939	chr1	224518088	224518089	ENST00000281701	-	1300
chr1	244613646	244616748	chr1	244615435	244615436	ENST00000366535	-	1000	chr1	244814548	244817765	chr1	244816237	244816238	ENST00000302550	+	1100
chr3	183601011	183602741	chr3	183602695	183602696	ENST00000421484	-	775	chr3	183851084	183853433	chr3	183853164	183853165	ENST00000444495	+	300
chr6	97729206	97732548	chr6	97731063	97731064	ENST00000509383	-	1125	chr6	99394189	99397156	chr6	99395848	99395849	ENST00000229971	-	1175
chr1	220219736	220221759	chr1	220219999	220220000	ENST00000366923	-	1600	chr1	220265959	220267842	chr1	220267444	220267445	ENST00000366922	+	725
chr21	38443736	38447810	chr21	38445526	38445527	ENST00000492275	+	1600	chr21	38638353	38641866	chr21	38640261	38640262	ENST00000288304	-	1175
chr21	38444186	38447384	chr21	38445526	38445527	ENST00000492275	+	1600	chr21	38738852	38740709	chr21	38739236	38739237	ENST00000462274	+	2175
chr15	59040077	59045685	chr15	59042176	59042177	ENST00000260408	-	1300	chr15	59061303	59067063	chr15	59063391	59063392	ENST00000316848	+	975
chr2	99951055	99957153	chr2	99953816	99953817	ENST00000289371	+	1425	chr2	100104418	100108530	chr2	100106496	100106497	ENST00000258428	-	1750
chr3	121261975	121264944	chr3	121264852	121264853	ENST00000264233	-	950	chr3	121467360	121470216	chr3	121468601	121468602	ENST00000340645	-	1475
chr21	40683837	40687545	chr21	40685744	40685745	ENST00000333229	-	1825	chr21	40816624	40819639	chr21	40817781	40817782	ENST00000380637	+	1125
chr14	31494077	31496185	chr14	31495606	31495607	ENST00000355683	-	825	chr14	31924915	31927180	chr14	31926646	31926647	ENST00000549185	-	1125
chr15	59061037	59064884	chr15	59063391	59063392	ENST00000316848	+	975	chr15	59224205	59227723	chr15	59225851	59225852	ENST00000380516	-	1050
chr4	56813951	56816639	chr4	56815147	56815148	ENST00000257287	+	1625	chr4	57299941	57302593	chr4	57301780	57301781	ENST00000264220	-	1350
chr13	20355577	20357406	chr13	20357081	20357082	ENST00000492741	-	175	chr13	20530666	20533432	chr13	20532810	20532811	ENST00000456228	+	1275
chr13	20356268	20358715	chr13	20357081	20357082	ENST00000492741	-	175	chr13	20437068	20439503	chr13	20437775	20437776	ENST00000337963	-	1250
chr7	103628555	103630772	chr7	103629962	103629963	ENST00000343529	-	1525	chr7	103847007	103849982	chr7	103848494	103848495	ENST00000297431	-	1300
chr9	72373387	72376208	chr9	72374857	72374858	ENST00000340434	-	1000	chr9	72873924	72875696	chr9	72873937	72873938	ENST00000361138	+	1400
chr3	9438792	9440401	chr3	9439299	9439300	ENST00000431285	+	1800	chr3	9832401	9834802	chr3	9834798	9834799	ENST00000397256	+	925
chr13	20436209	20441225	chr13	20437775	20437776	ENST00000337963	-	1250	chr13	20530618	20535266	chr13	20532810	20532811	ENST00000456228	+	1275
chr8	95564422	95566417	chr8	95565756	95565757	ENST00000421249	-	1000	chr8	95731300	95733624	chr8	95732128	95732129	ENST00000414645	+	925
chr8	95565366	95567177	chr8	95565756	95565757	ENST00000421249	-	1000	chr8	96036825	96038672	chr8	96037296	96037297	ENST00000286687	+	1250
chr2	47401510	47404292	chr2	47403649	47403650	ENST00000422269	-	1700	chr3	9438426	9440104	chr3	9439299	9439300	ENST00000431285	+	1800
chr1	160230839	160233665	chr1	160232320	160232321	ENST00000461888	-	825	chr1	160312488	160314927	chr1	160313189	160313190	ENST00000241704	-	1100
chr8	95730539	95733622	chr8	95732128	95732129	ENST00000414645	+	925	chr8	95834206	95838888	chr8	95835527	95835528	ENST00000523731	+	750
chr2	47401510	47404292	chr2	47403649	47403650	ENST00000422269	-	1700	chr3	9438426	9440104	chr3	9439299	9439300	ENST00000431285	+	1800
chr2	160142525	160146127	chr2	160143309	160143310	ENST00000359774	-	1150	chr2	160567241	160571127	chr2	160569000	160569001	ENST00000409175	+	1675
chr16	88634023	88637683	chr16	88636789	88636790	ENST00000301011	+	900	chr16	88850146	88853064	chr16	88851618	88851619	ENST00000301015	-	700
chr15	59223432	59227292	chr15	59225851	59225852	ENST00000380516	-	1050	chr15	59278800	59280721	chr15	59279854	59279855	ENST00000348370	+	925
chr8	95835151	95838228	chr8	95835527	95835528	ENST00000523731	+	750	chr8	96036599	96039705	chr8	96037296	96037297	ENST00000286687	+	1250
chr11	46613853	46615716	chr11	46615674	46615675	ENST00000526606	-	1425	chr11	46637980	46640935	chr11	46638826	46638827	ENST00000312040	+	975
chr12	112034569	112037732	chr12	112037479	112037480	ENST00000550104	-	1400	chr12	112122698	112126391	chr12	112123789	112123790	ENST00000419234	-	1350
chr12	46121288	46123809	chr12	46123448	46123449	ENST00000334344	+	1700	chr12	46776247	46778764	chr12	46777462	46777463	ENST00000551503	+	1275
chr21	38632653	38646208	chr21	38640261	38640262	ENST00000288304	-	1175	chr21	38732781	38748129	chr21	38739236	38739237	ENST00000462274	+	2175
chr15	41406745	41409392	chr15	41408551	41408552	ENST00000361937	-	1350	chr15	41623521	41626579	chr15	41624892	41624893	ENST00000260359	+	1000
chr3	155522036	155526613	chr3	155524139	155524140	ENST00000340171	-	975	chr3	155586597	155592084	chr3	155588325	155588326	ENST00000496455	+	1800
chr22	20850024	20851927	chr22	20850169	20850170	ENST00000328879	-	850	chr22	21212671	21214629	chr22	21213099	21213100	ENST00000485963	-	1575
chr13	32889558	32891064	chr13	32889611	32889612	ENST00000380152	+	975	chr13	33110837	33113054	chr13	33112969	33112970	ENST00000505213	-	1475
chr12	112278984	112281868	chr12	112279782	112279783	ENST00000550735	+	1075	chr12	112546465	112548249	chr12	112546825	112546826	ENST00000261745	-	1150
chr4	74122515	74124717	chr4	74124514	74124515	ENST00000561029	-	1625	chr4	75023066	75024638	chr4	75023829	75023830	ENST00000331145	+	1100
chr9	132596327	132598875	chr9	132597725	132597726	ENST00000372429	+	725	chr9	132814307	132816612	chr9	132815705	132815706	ENST00000347136	+	1175
chr15	41624382	41626552	chr15	41624892	41624893	ENST00000260359	+	1000	chr15	41708725	41711080	chr15	41709302	41709303	ENST00000389629	+	1275
chr13	33111696	33114704	chr13	33112969	33112970	ENST00000505213	-	1475	chr13	33159249	33161806	chr13	33160564	33160565	ENST00000315596	+	1025
chr4	10117400	10119957	chr4	10118572	10118573	ENST00000382451	-	875	chr9	33165887	33167387	chr9	33167353	33167354	ENST00000535206	-	1875
chr4	10117400	10119957	chr4	10118572	10118573	ENST00000382451	-	875	chr9	33165887	33167387	chr9	33167353	33167354	ENST00000535206	-	1875
chr10	89575333	89578815	chr10	89577916	89577917	ENST00000541004	-	1250	chr10	89619388	89623763	chr10	89622870	89622871	ENST00000371953	+	1350
chr3	9834396	9836826	chr3	9834798	9834799	ENST00000397256	+	925	chr3	10066430	10068848	chr3	10068098	10068099	ENST00000287647	+	1125
chr4	48270141	48273598	chr4	48271880	48271881	ENST00000381501	-	1750	chr4	48341900	48344865	chr4	48343339	48343340	ENST00000264313	+	1625
chr15	83734393	83737227	chr15	83736105	83736106	ENST00000261721	-	1800	chr15	83876568	83879136	chr15	83876769	83876770	ENST00000299633	-	1950
chr12	89918512	89920381	chr12	89919800	89919801	ENST00000313546	-	1000	chr12	90101079	90104961	chr12	90103076	90103077	ENST00000551310	-	1825
chr2	114512629	114516386	chr2	114514399	114514400	ENST00000245680	-	1450	chr2	114645660	114650521	chr2	114647537	114647538	ENST00000263238	+	1725
chr2	28972757	28974770	chr2	28974614	28974615	ENST00000358506	+	1825	chr2	29116591	29118797	chr2	29117509	29117510	ENST00000407426	+	1100
chr1	53018867	53020498	chr1	53019129	53019130	ENST00000484723	-	925	chr1	53307569	53309846	chr1	53308183	53308184	ENST00000371532	+	375
chr6	17705435	17708057	chr6	17706655	17706656	ENST00000537253	-	1475	chr6	18264476	18267254	chr6	18265053	18265054	ENST00000397239	-	1675
chr7	27699948	27706867	chr7	27702613	27702614	ENST00000265395	-	725	chr7	27775418	27784557	chr7	27778992	27778993	ENST00000543117	+	1825
chr20	30308843	30312734	chr20	30311702	30311703	ENST00000450273	-	1375	chr20	30325014	30329890	chr20	30327074	30327075	ENST00000340513	+	975
chr15	50644601	50650486	chr15	50647604	50647605	ENST00000380877	-	1050	chr15	50714318	50720349	chr15	50716579	50716580	ENST00000433963	+	1650
chr4	39030647	39035385	chr4	39034040	39034041	ENST00000381938	-	1350	chr4	39042861	39047814	chr4	39046659	39046660	ENST00000261425	+	1775
chr15	50645568	50648513	chr15	50647604	50647605	ENST00000380877	-	1050	chr15	51198882	51201905	chr15	51200869	51200870	ENST00000561441	+	975
chr3	25701188	25707810	chr3	25706397	25706398	ENST00000424225	-	1500	chr3	25829717	25833826	chr3	25831529	25831530	ENST00000417874	-	1700
chr3	33480110	33483437	chr3	33482001	33482002	ENST00000283628	-	1700	chr3	33838855	33842052	chr3	33839844	33839845	ENST00000307296	+	1225
chr3	99534888	99538188	chr3	99536678	99536679	ENST00000421999	+	1025	chr3	99978029	99981295	chr3	99979845	99979846	ENST00000344949	+	1150
chr12	69003328	69006471	chr12	69004619	69004620	ENST00000250559	+	1875	chr12	69077869	69082085	chr12	69080514	69080515	ENST00000229179	+	475
chr17	60003486	60006277	chr17	60005376	60005377	ENST00000444766	-	325	chr17	60141285	60143515	chr17	60142642	60142643	ENST00000397786	-	1425
chr5	132294978	132301110	chr5	132299325	132299326	ENST00000265343	-	1300	chr5	132385282	132392441	chr5	132387654	132387655	ENST00000304858	+	1475
chr4	83818626	83823993	chr4	83821690	83821691	ENST00000355196	-	750	chr4	83930728	83936225	chr4	83934078	83934079	ENST00000505397	-	1675
chr8	90995516	90998828	chr8	90996943	90996944	ENST00000265433	-	1450	chr8	91010778	91014105	chr8	91013633	91013634	ENST00000220764	+	1650
chr6	82955869	82958854	chr6	82957470	82957471	ENST00000369751	-	775	chr6	83775962	83779324	chr6	83777385	83777386	ENST00000237163	+	1100
chr4	83820191	83823482	chr4	83821690	83821691	ENST00000355196	-	750	chr4	83950905	83956052	chr4	83955600	83955601	ENST00000509093	+	1825
chr6	82956683	82959126	chr6	82957470	82957471	ENST00000369751	-	775	chr6	83774048	83775568	chr6	83775559	83775560	ENST00000369747	-	500
chr2	47402764	47405389	chr2	47403649	47403650	ENST00000422269	-	1700	chr2	47627574	47630501	chr2	47630108	47630109	ENST00000233146	+	600
chr3	33481917	33483961	chr3	33482001	33482002	ENST00000283628	-	1700	chr3	33758871	33761002	chr3	33759847	33759848	ENST00000359576	-	1550
chr3	99535897	99537944	chr3	99536678	99536679	ENST00000421999	+	1025	chr3	99594142	99596963	chr3	99595016	99595017	ENST00000476723	-	1100
chr21	36259493	36266053	chr21	36262086	36262087	ENST00000399237	-	1450	chr21	36419530	36423641	chr21	36421640	36421641	ENST00000300305	-	725
chr9	34047473	34050641	chr9	34048946	34048947	ENST00000412543	-	675	chr9	34124831	34126833	chr9	34126770	34126771	ENST00000361264	-	575
chr3	48955974	48957797	chr3	48956254	48956255	ENST00000430423	+	1775	chr3	49448912	49450941	chr3	49449634	49449635	ENST00000418115	-	1500
chr4	83930284	83936573	chr4	83934078	83934079	ENST00000505397	-	1675	chr4	83953019	83958441	chr4	83955600	83955601	ENST00000509093	+	1825
chr9	34126364	34128517	chr9	34126770	34126771	ENST00000361264	-	575	chr9	34177850	34179946	chr9	34179003	34179004	ENST00000543944	+	1325
chr15	50977199	50979864	chr15	50979011	50979012	ENST00000313478	-	1250	chr15	51198670	51201821	chr15	51200869	51200870	ENST00000561441	+	975
chr8	41435065	41437722	chr8	41435719	41435720	ENST00000396987	+	1025	chr8	41654323	41657057	chr8	41655139	41655140	ENST00000289734	-	1250
chr9	102580667	102584355	chr9	102582170	102582171	ENST00000427039	-	775	chr9	102667685	102671328	chr9	102668915	102668916	ENST00000259400	+	1225
chr12	105476762	105478986	chr12	105478354	105478355	ENST00000258494	-	675	chr12	105499431	105503042	chr12	105501492	105501493	ENST00000332180	+	1525
chr6	18153312	18157193	chr6	18155560	18155561	ENST00000546309	+	325	chr6	18263484	18266582	chr6	18265053	18265054	ENST00000397239	-	1675
chr9	102580870	102583441	chr9	102582170	102582171	ENST00000427039	-	775	chr9	103113195	103115519	chr9	103115220	103115221	ENST00000374902	-	1350
chr9	102581254	102583712	chr9	102582170	102582171	ENST00000427039	-	775	chr9	102860113	102863116	chr9	102861321	102861322	ENST00000262455	-	1575
chr7	138791373	138796542	chr7	138794464	138794465	ENST00000471652	-	1575	chr7	139042405	139045331	chr7	139044627	139044628	ENST00000545899	+	1600
chr14	69863611	69866530	chr14	69864732	69864733	ENST00000556125	+	875	chr14	81685832	81688549	chr14	81687574	81687575	ENST00000434192	-	950
chr15	60682695	60694814	chr15	60690940	60690941	ENST00000559818	-	2475	chr15	60759921	60773180	chr15	60771358	60771359	ENST00000558181	-	1225
chr5	138532848	138535065	chr5	138534086	138534087	ENST00000394817	-	1050	chr5	138608060	138610633	chr5	138609441	138609442	ENST00000509990	+	475
chr15	80214303	80216917	chr15	80216095	80216096	ENST00000494999	-	725	chr15	80350321	80353023	chr15	80351910	80351911	ENST00000261749	+	1925
chr18	29520544	29523172	chr18	29523098	29523099	ENST00000580104	-	700	chr18	33708356	33710539	chr18	33709834	33709835	ENST00000358232	+	1175
chr2	65355396	65357610	chr2	65357239	65357240	ENST00000409784	-	1675	chr2	65662733	65664325	chr2	65663864	65663865	ENST00000377977	+	725
chr2	44393756	44397097	chr2	44395108	44395109	ENST00000419807	+	1975	chr2	44587222	44589912	chr2	44589000	44589001	ENST00000541738	-	1125
chr5	122757483	122760745	chr5	122759285	122759286	ENST00000508442	-	1250	chr5	122846891	122850545	chr5	122847793	122847794	ENST00000345990	+	1750
chr2	65355965	65360126	chr2	65357239	65357240	ENST00000409784	-	1675	chr2	65452748	65457232	chr2	65454887	65454888	ENST00000260641	+	1700
chr1	10002086	10005062	chr1	10003486	10003487	ENST00000377205	+	750	chr1	10091281	10093134	chr1	10092890	10092891	ENST00000253251	+	1050
chr3	13460694	13462518	chr3	13461808	13461809	ENST00000254508	-	675	chr3	44801651	44803414	chr3	44803209	44803210	ENST00000326047	+	1300
chr10	975330	979257	chr10	977563	977564	ENST00000406525	-	1475	chr10	1093215	1097529	chr10	1095478	1095479	ENST00000358220	+	75
chr12	27165898	27167472	chr12	27167326	27167327	ENST00000343028	-	625	chr12	27175326	27177021	chr12	27175510	27175511	ENST00000538186	+	1300
chr20	47537174	47541180	chr20	47538427	47538428	ENST00000371917	+	1200	chr20	47661679	47664660	chr20	47662849	47662850	ENST00000262982	+	1325
chr1	115052939	115055489	chr1	115053780	115053781	ENST00000358465	-	1425	chr1	115300419	115302265	chr1	115300647	115300648	ENST00000530886	-	1425
chr13	26795756	26799175	chr13	26796397	26796398	ENST00000468480	-	1050	chr13	26827568	26831552	chr13	26828276	26828277	ENST00000381527	+	1850
chr14	35341948	35345853	chr14	35344852	35344853	ENST00000358716	-	1475	chr14	35449382	35453241	chr14	35451163	35451164	ENST00000556994	+	1100
chr4	123746469	123750864	chr4	123747863	123747864	ENST00000264498	+	1450	chr4	123843261	123845484	chr4	123844229	123844230	ENST00000274008	+	1200
chr2	69869445	69872017	chr2	69870848	69870849	ENST00000406297	-	1625	chr2	70313810	70316074	chr2	70315685	70315686	ENST00000452431	-	1000
chr20	35722702	35727215	chr20	35724397	35724398	ENST00000373664	-	1125	chr20	35804541	35809022	chr20	35807449	35807450	ENST00000237530	+	1200
chr17	37604386	37611889	chr17	37607538	37607539	ENST00000300651	-	1225	chr17	37616048	37620931	chr17	37617764	37617765	ENST00000584632	+	1200
chr20	47802861	47807354	chr20	47804903	47804904	ENST00000347458	-	925	chr20	47893282	47896558	chr20	47894962	47894963	ENST00000371754	-	1425
chr19	34661181	34664929	chr19	34663352	34663353	ENST00000433627	+	1325	chr19	34917448	34920859	chr19	34919268	34919269	ENST00000246548	+	1300
chr10	5725559	5728313	chr10	5726801	5726802	ENST00000328090	+	1550	chr10	5930802	5933492	chr10	5931535	5931536	ENST00000397269	+	850
chr13	103247038	103252558	chr13	103249353	103249354	ENST00000376065	+	1550	chr13	103451094	103454180	chr13	103451399	103451400	ENST00000257336	+	950
chr3	135967505	135970256	chr3	135969148	135969149	ENST00000251654	+	850	chr3	136469769	136472442	chr3	136471219	136471220	ENST00000483235	-	1400
chr2	55644452	55648722	chr2	55647056	55647057	ENST00000436346	-	1700	chr2	55843350	55848689	chr2	55844757	55844758	ENST00000407823	-	800
chr19	34743721	34747170	chr19	34745456	34745457	ENST00000299505	+	1500	chr19	34918122	34921117	chr19	34919268	34919269	ENST00000246548	+	1300
chr2	9694267	9698929	chr2	9695916	9695917	ENST00000310823	-	1325	chr2	9766642	9773016	chr2	9771142	9771143	ENST00000238081	-	1275
chr12	42629683	42634871	chr12	42632150	42632151	ENST00000547254	-	900	chr12	42717173	42721669	chr12	42719947	42719948	ENST00000337898	+	1375
chr10	94002101	94003735	chr10	94003035	94003036	ENST00000412050	-	1300	chr10	94050527	94052941	chr10	94050920	94050921	ENST00000358935	+	1400
chr2	112811436	112813368	chr2	112812800	112812801	ENST00000283206	+	500	chr2	113032583	113034776	chr2	113033171	113033172	ENST00000409871	+	325
chr2	112812169	112814441	chr2	112812800	112812801	ENST00000283206	+	500	chr2	113238418	113240950	chr2	113239731	113239732	ENST00000233336	+	425
chr2	86330519	86334714	chr2	86333277	86333278	ENST00000263857	-	875	chr2	86420374	86424108	chr2	86422892	86422893	ENST00000410111	-	1350
chr15	66677679	66684061	chr15	66679155	66679156	ENST00000307102	+	1575	chr15	66793843	66798400	chr15	66797297	66797298	ENST00000307897	+	800
chr18	2569047	2574099	chr18	2571510	2571511	ENST00000261597	+	1025	chr18	2653440	2658180	chr18	2655737	2655738	ENST00000320876	+	1450
chr2	55843362	55845607	chr2	55844757	55844758	ENST00000407823	-	800	chr2	55918078	55921710	chr2	55921044	55921045	ENST00000447944	-	1025
chr10	94330286	94336827	chr10	94333832	94333833	ENST00000265986	-	900	chr10	94349891	94354260	chr10	94353043	94353044	ENST00000260731	+	1650
chr21	47702524	47712328	chr21	47706210	47706211	ENST00000397708	-	275	chr21	47732975	47746274	chr21	47744036	47744037	ENST00000359568	+	775
chr15	66793522	66799444	chr15	66797297	66797298	ENST00000307897	+	800	chr15	66872828	66877926	chr15	66874528	66874529	ENST00000558797	+	1400
chr12	95610162	95613457	chr12	95611257	95611258	ENST00000451107	-	1100	chr12	95866005	95870695	chr12	95867296	95867297	ENST00000535095	+	1575
chr15	22832161	22835519	chr15	22833395	22833396	ENST00000283645	+	800	chr15	23809532	23812738	chr15	23810864	23810865	ENST00000568252	+	1250
chr1	15942489	15946035	chr1	15943995	15943996	ENST00000480945	+	1225	chr1	16173092	16176931	chr1	16174359	16174360	ENST00000375759	+	1125
chr5	32168922	32175607	chr5	32174455	32174456	ENST00000265070	-	1075	chr5	32310082	32314904	chr5	32313114	32313115	ENST00000382142	-	1400
chr15	58356974	58359469	chr15	58358615	58358616	ENST00000249750	-	1725	chr15	60688408	60691704	chr15	60690940	60690941	ENST00000559818	-	2475
chr5	32174449	32176647	chr5	32174455	32174456	ENST00000265070	-	1075	chr5	32444354	32447152	chr5	32444866	32444867	ENST00000265069	-	1350
chr2	86667181	86671352	chr2	86667924	86667925	ENST00000409556	+	1400	chr2	86788569	86792016	chr2	86790601	86790602	ENST00000409225	-	1225
chr4	146015820	146023286	chr4	146019692	146019693	ENST00000514390	-	1150	chr4	146096999	146102533	chr4	146101312	146101313	ENST00000447906	-	1175
chr5	115177015	115179299	chr5	115177178	115177179	ENST00000316788	+	1725	chr5	115418616	115421272	chr5	115420688	115420689	ENST00000274458	+	1475
chrX	70585846	70587578	chrX	70586114	70586115	ENST00000423759	+	1450	chrX	70750778	70754458	chrX	70752933	70752934	ENST00000373719	+	1725
chr11	77789759	77792224	chr11	77790910	77790911	ENST00000530054	-	1250	chr11	78284350	78286874	chr11	78285918	78285919	ENST00000529571	-	750
chr3	37031994	37035359	chr3	37034823	37034824	ENST00000231790	+	450	chr3	37280819	37285813	chr3	37284668	37284669	ENST00000361924	+	1475
chr1	223899719	223902673	chr1	223900034	223900035	ENST00000295006	+	1025	chr1	224516675	224518721	chr1	224518088	224518089	ENST00000281701	-	1300
chr12	22694584	22699120	chr12	22697479	22697480	ENST00000333957	-	725	chr12	22776373	22782111	chr12	22778009	22778010	ENST00000266517	+	1325
chr2	135674239	135677070	chr2	135676395	135676396	ENST00000264157	+	1675	chr2	135809820	135811798	chr2	135809835	135809836	ENST00000264158	+	1325
chr1	36021772	36027012	chr1	36023550	36023551	ENST00000482929	-	1000	chr1	36232791	36236690	chr1	36235567	36235568	ENST00000251195	-	975
chr1	36023544	36025320	chr1	36023550	36023551	ENST00000482929	-	1000	chr1	36105752	36108450	chr1	36107444	36107445	ENST00000373237	-	1575
chr5	148929602	148931700	chr5	148931006	148931007	ENST00000377843	-	825	chr5	149379111	149381922	chr5	149379884	149379885	ENST00000503427	+	1100
chr5	108743496	108747365	chr5	108745694	108745695	ENST00000361189	-	2100	chr5	109024083	109029641	chr5	109025067	109025068	ENST00000261483	+	1475
chr18	12375636	12378066	chr18	12377250	12377251	ENST00000269143	-	725	chr18	12991064	12992748	chr18	12991361	12991362	ENST00000506447	+	1425
chr5	176447930	176450277	chr5	176449697	176449698	ENST00000358149	+	475	chr5	176559515	176561786	chr5	176560080	176560081	ENST00000354179	+	1250
chr1	235490115	235492174	chr1	235491533	235491534	ENST00000349213	-	1525	chr1	235667079	235670195	chr1	235667780	235667781	ENST00000366600	-	2025
chr3	43660817	43665304	chr3	43663559	43663560	ENST00000292246	-	1425	chr3	43729750	43735886	chr3	43733085	43733086	ENST00000413397	-	675
chr15	63479864	63482894	chr15	63481668	63481669	ENST00000321437	+	1700	chr15	63794555	63797772	chr15	63796793	63796794	ENST00000561442	+	1950
chr10	70285856	70290593	chr10	70287230	70287231	ENST00000265870	-	1075	chr10	70318899	70326430	chr10	70320413	70320414	ENST00000373644	+	1400
chr5	76787070	76789583	chr5	76788420	76788421	ENST00000296679	-	1175	chr5	77589322	77591998	chr5	77590578	77590579	ENST00000255194	-	1325
chr10	120840185	120842269	chr10	120840395	120840396	ENST00000478852	-	1150	chr10	121301551	121304157	chr10	121302219	121302220	ENST00000369103	-	800
chr11	9284656	9288251	chr11	9286936	9286937	ENST00000328194	-	1150	chr11	9406150	9408599	chr11	9406169	9406170	ENST00000379719	+	1700
chr5	71614985	71617771	chr5	71616087	71616088	ENST00000261413	-	1075	chr5	72142565	72145905	chr5	72144011	72144012	ENST00000506351	+	1250
chr21	38334336	38340655	chr21	38338772	38338773	ENST00000399120	-	450	chr21	38441189	38448320	chr21	38445526	38445527	ENST00000492275	+	1600
chr1	247092592	247095168	chr1	247094725	247094726	ENST00000326225	-	1550	chr1	247240880	247243272	chr1	247242112	247242113	ENST00000474541	-	1500
chr21	38337574	38340027	chr21	38338772	38338773	ENST00000399120	-	450	chr21	38638426	38641465	chr21	38640261	38640262	ENST00000288304	-	1175
chr10	70318697	70323705	chr10	70320413	70320414	ENST00000373644	+	1400	chr10	70479449	70483102	chr10	70480971	70480972	ENST00000535016	+	200
chr7	107202895	107206908	chr7	107204958	107204959	ENST00000297135	-	1775	chr7	107531209	107533385	chr7	107531609	107531610	ENST00000417551	+	1650
chr1	36107158	36108756	chr1	36107444	36107445	ENST00000373237	-	1575	chr1	36235158	36236852	chr1	36235567	36235568	ENST00000251195	-	975
chr1	93543004	93547095	chr1	93544792	93544793	ENST00000545708	+	1625	chr1	93643826	93649088	chr1	93645476	93645477	ENST00000343253	+	925
chr6	135817566	135820390	chr6	135818913	135818914	ENST00000265602	-	1025	chr6	147524276	147525845	chr6	147525561	147525562	ENST00000546097	+	1100
chrX	122865390	122868661	chrX	122866905	122866906	ENST00000355725	-	1375	chrX	122991432	122995679	chrX	122993614	122993615	ENST00000481776	+	475
chr10	70479224	70482785	chr10	70480971	70480972	ENST00000535016	+	200	chr10	70659328	70662610	chr10	70661034	70661035	ENST00000373585	+	800
chr2	70314442	70317109	chr2	70315685	70315686	ENST00000452431	-	1000	chr2	70474821	70476981	chr2	70475746	70475747	ENST00000470096	-	925
chr17	47838414	47849022	chr17	47841528	47841529	ENST00000240364	-	1100	chr17	47861094	47868686	chr17	47865917	47865918	ENST00000259021	+	1300
chrX	122991568	122997304	chrX	122993614	122993615	ENST00000481776	+	475	chrX	123092854	123098083	chrX	123094062	123094063	ENST00000394477	+	1325
chr18	33645910	33648390	chr18	33647518	33647519	ENST00000357384	-	1450	chr18	33708275	33710713	chr18	33709834	33709835	ENST00000358232	+	1175
chr22	41486158	41490204	chr22	41487790	41487791	ENST00000263253	+	1250	chr22	41680749	41683159	chr22	41682254	41682255	ENST00000356244	-	575
chr1	149980215	149984264	chr1	149982624	149982625	ENST00000369135	-	1100	chr1	150036474	150041542	chr1	150039369	150039370	ENST00000369130	+	325
chr1	211430859	211434419	chr1	211432621	211432622	ENST00000367006	+	575	chr1	211555069	211558654	chr1	211556145	211556146	ENST00000423222	+	1025
chr6	36409184	36410963	chr6	36410544	36410545	ENST00000373731	+	600	chr6	36513836	36516900	chr6	36515246	36515247	ENST00000229812	-	800
chr2	26100275	26102222	chr2	26101384	26101385	ENST00000435504	-	575	chr2	26255452	26258284	chr2	26256976	26256977	ENST00000495146	+	1750
chrX	16735978	16740764	chrX	16737755	16737756	ENST00000380155	+	1400	chrX	16803027	16809521	chrX	16804550	16804551	ENST00000380122	+	1050
chr5	131890698	131894993	chr5	131892616	131892617	ENST00000378823	+	800	chr5	132384938	132388814	chr5	132387654	132387655	ENST00000304858	+	1475
chr3	130567719	130571405	chr3	130569439	130569440	ENST00000505330	+	1450	chr3	130611378	130615561	chr3	130612812	130612813	ENST00000510168	+	1475
chr19	47613763	47618052	chr19	47617008	47617009	ENST00000253048	-	650	chr19	47632287	47637347	chr19	47634080	47634081	ENST00000270225	+	1225
chr6	111135900	111138467	chr6	111136839	111136840	ENST00000323817	-	950	chr6	111301088	111303516	chr6	111303218	111303219	ENST00000441448	+	1125
chr3	56589586	56592975	chr3	56591189	56591190	ENST00000422222	+	1175	chr3	56714350	56719200	chr3	56717264	56717265	ENST00000355628	-	700
chr3	32610879	32613417	chr3	32612365	32612366	ENST00000273130	-	1050	chr3	32726488	32728512	chr3	32726637	32726638	ENST00000328834	+	850
chr4	88139395	88142439	chr4	88141759	88141760	ENST00000273963	-	1000	chr4	88311139	88313328	chr4	88312537	88312538	ENST00000358290	-	1050
chr3	88107215	88109971	chr3	88108424	88108425	ENST00000473136	+	1800	chr3	88197433	88199191	chr3	88199034	88199035	ENST00000462901	-	1050
chr7	141250085	141253694	chr7	141250989	141250990	ENST00000355413	+	925	chr7	141437033	141440777	chr7	141438200	141438201	ENST00000465582	+	850
chr15	49446244	49450190	chr15	49447853	49447854	ENST00000559883	+	2225	chr15	50645448	50647621	chr15	50647604	50647605	ENST00000380877	-	1050
chr1	169763994	169765974	chr1	169764190	169764191	ENST00000359326	+	1425	chr1	169862962	169865288	chr1	169863092	169863093	ENST00000367771	-	975
chr1	200584462	200596426	chr1	200589861	200589862	ENST00000367350	-	650	chr1	200635220	200643856	chr1	200639034	200639035	ENST00000447706	-	600
chr10	74384289	74387301	chr10	74385898	74385899	ENST00000398761	-	1400	chr10	74449110	74452110	chr10	74451889	74451890	ENST00000373053	+	1250
chr10	43132954	43135205	chr10	43134000	43134001	ENST00000486187	-	925	chr10	43277445	43279937	chr10	43278249	43278250	ENST00000374518	+	1500
chr18	9334546	9336965	chr18	9334765	9334766	ENST00000262120	+	1375	chr18	9474025	9476757	chr18	9475007	9475008	ENST00000019317	+	1500
chr1	173991432	173994922	chr1	173991434	173991435	ENST00000367696	-	1475	chr1	174124746	174129302	chr1	174128548	174128549	ENST00000367689	+	1600
chr5	134092259	134096066	chr5	134094469	134094470	ENST00000507392	+	750	chr5	134239320	134242266	chr5	134240596	134240597	ENST00000254908	+	225
chr4	140095434	140099752	chr4	140098371	140098372	ENST00000394235	-	1375	chr4	140220208	140224150	chr4	140222609	140222610	ENST00000296543	+	1775
chr9	33023647	33025799	chr9	33025109	33025110	ENST00000495360	-	500	chr9	33288924	33292045	chr9	33290509	33290510	ENST00000379540	+	875
chr3	142297625	142299268	chr3	142297667	142297668	ENST00000350721	-	625	chr3	142441632	142445353	chr3	142442916	142442917	ENST00000476941	+	1775
chr16	71840719	71844104	chr16	71843103	71843104	ENST00000299980	-	1575	chr16	72124883	72128411	chr16	72127455	72127456	ENST00000562153	-	900
chr16	71841284	71844520	chr16	71843103	71843104	ENST00000299980	-	1575	chr16	71878157	71881366	chr16	71879899	71879900	ENST00000568581	+	1150
chr6	3062298	3065660	chr6	3064092	3064093	ENST00000490396	+	1775	chr6	3259078	3262650	chr6	3259218	3259219	ENST00000451246	+	1375
chr2	38825670	38832919	chr2	38830170	38830171	ENST00000409636	-	1775	chr2	38891527	38903424	chr2	38893052	38893053	ENST00000272252	+	975
chr11	108091790	108094967	chr11	108093368	108093369	ENST00000278612	-	1250	chr11	108462852	108466169	chr11	108464464	108464465	ENST00000525344	-	575
chr17	58601302	58605122	chr17	58603579	58603580	ENST00000083182	-	1025	chr17	58676396	58680489	chr17	58677554	58677555	ENST00000305921	+	1300
chr3	142442417	142444804	chr3	142442916	142442917	ENST00000476941	+	1775	chr3	142718685	142721847	chr3	142720010	142720011	ENST00000488497	+	2400
chr12	104678772	104682731	chr12	104680460	104680461	ENST00000503506	+	1025	chr12	105498551	105503490	chr12	105501492	105501493	ENST00000332180	+	1525
chr17	28803807	28806206	chr17	28804380	28804381	ENST00000225724	+	1050	chr17	29151026	29153029	chr17	29151793	29151794	ENST00000324238	-	550
chr6	125473938	125476491	chr6	125474795	125474796	ENST00000304877	+	1400	chr6	126101713	126103318	chr6	126102307	126102308	ENST00000368357	+	875
chr3	33137108	33140397	chr3	33138721	33138722	ENST00000307363	-	1400	chr3	33480772	33483113	chr3	33482001	33482002	ENST00000283628	-	1700
chr13	52022475	52029228	chr13	52027342	52027343	ENST00000398119	-	525	chr13	52156654	52162250	chr13	52158644	52158645	ENST00000298125	+	1825
chr2	172013756	172019540	chr2	172017409	172017410	ENST00000409443	-	1950	chr2	172285624	172293532	chr2	172290727	172290728	ENST00000468592	+	725
chr11	63437875	63444495	chr11	63439380	63439381	ENST00000538786	-	1475	chr11	63445155	63450267	chr11	63448918	63448919	ENST00000341307	+	1475
chr18	9613045	9616469	chr18	9614566	9614567	ENST00000400555	-	1100	chr18	9913547	9915707	chr18	9913999	9914000	ENST00000400000	+	1600
chr20	56882936	56886452	chr20	56884752	56884753	ENST00000244040	+	1100	chr20	56963316	56967547	chr20	56964178	56964179	ENST00000475243	+	925
chr17	29146302	29156031	chr17	29151793	29151794	ENST00000324238	-	550	chr17	29156934	29162023	chr17	29158988	29158989	ENST00000578295	+	700
chr1	182756413	182763148	chr1	182758428	182758429	ENST00000488424	+	1100	chr1	182806884	182810138	chr1	182808504	182808505	ENST00000367549	+	1750
chr17	76775924	76781108	chr17	76778375	76778376	ENST00000361101	-	1075	chr17	76834953	76839265	chr17	76836968	76836969	ENST00000312010	-	1450
chr5	59994332	59996148	chr5	59996016	59996017	ENST00000512452	-	1675	chr5	60627447	60629730	chr5	60628100	60628101	ENST00000252744	+	800
chr8	48871246	48875685	chr8	48872742	48872743	ENST00000338368	-	875	chr8	48919504	48923066	chr8	48920960	48920961	ENST00000523111	+	425
chr2	172287753	172291848	chr2	172290727	172290728	ENST00000468592	+	725	chr2	172543733	172546489	chr2	172543919	172543920	ENST00000340296	+	1100
chr6	154830235	154832250	chr6	154831792	154831793	ENST00000367213	-	1575	chr6	155635471	155637829	chr6	155635617	155635618	ENST00000470239	-	625
chr1	182807227	182809936	chr1	182808504	182808505	ENST00000367549	+	1750	chr1	183440134	183442858	chr1	183441351	183441352	ENST00000440812	+	1875
chr15	75746665	75750304	chr15	75748182	75748183	ENST00000564778	-	1300	chr15	75867936	75873114	chr15	75871629	75871630	ENST00000306726	-	1650
chr9	33815745	33818952	chr9	33817565	33817566	ENST00000263228	+	825	chr9	34047345	34049897	chr9	34048946	34048947	ENST00000412543	-	675
chr2	172289011	172290991	chr2	172290727	172290728	ENST00000468592	+	725	chr2	172749560	172752051	chr2	172750761	172750762	ENST00000422440	-	750
chr1	180470531	180473320	chr1	180472088	180472089	ENST00000367595	-	975	chr1	180599332	180602016	chr1	180601140	180601141	ENST00000367590	+	1550
chr2	128783173	128786682	chr2	128785693	128785694	ENST00000259234	-	1350	chr2	128847202	128850282	chr2	128848782	128848783	ENST00000375990	+	1450
chr1	21111442	21116539	chr1	21113180	21113181	ENST00000312239	-	1600	chr1	21500351	21505379	chr1	21503376	21503377	ENST00000438975	-	325
chr14	81684581	81688465	chr14	81687574	81687575	ENST00000434192	-	950	chr14	81899255	81904181	chr14	81902808	81902809	ENST00000557055	-	1925
chr1	114351760	114356326	chr1	114355097	114355098	ENST00000261441	-	1675	chr1	114471041	114474785	chr1	114471814	114471815	ENST00000426820	+	1475
chr18	19177694	19182489	chr18	19180844	19180845	ENST00000383276	-	725	chr18	19318680	19322777	chr18	19321281	19321282	ENST00000261537	+	700
chr7	35730631	35737853	chr7	35734744	35734745	ENST00000396081	-	825	chr7	35839073	35842998	chr7	35840542	35840543	ENST00000435235	+	1800
chr5	36150467	36154483	chr5	36152062	36152063	ENST00000296603	-	1150	chr5	36238242	36244873	chr5	36242380	36242381	ENST00000506945	-	2500
chr13	99737622	99740426	chr13	99738878	99738879	ENST00000427887	-	50	chr13	99849568	99854070	chr13	99853028	99853029	ENST00000403766	+	1275
chr18	19278852	19287969	chr18	19284765	19284766	ENST00000289119	-	425	chr18	19318448	19324124	chr18	19321281	19321282	ENST00000261537	+	700
chr3	171527156	171529928	chr3	171528283	171528284	ENST00000351298	-	1750	chr3	171757391	171759841	chr3	171757418	171757419	ENST00000392699	+	1075
chr1	23344848	23347151	chr1	23345941	23345942	ENST00000356634	+	1975	chr1	23495210	23496827	chr1	23495350	23495351	ENST00000418342	-	1600
chr1	171453211	171456610	chr1	171454651	171454652	ENST00000392078	+	1525	chr1	171708836	171712780	chr1	171711386	171711387	ENST00000236192	-	1025
chr5	78808418	78812644	chr5	78810039	78810040	ENST00000334082	-	700	chr5	78906748	78909929	chr5	78908243	78908244	ENST00000453514	+	1200
chr5	112253961	112259306	chr5	112258235	112258236	ENST00000379638	-	1375	chr5	112310933	112315767	chr5	112312399	112312400	ENST00000515408	+	1475
chr6	108580666	108584902	chr6	108582463	108582464	ENST00000230085	-	1525	chr6	108613920	108617742	chr6	108616098	108616099	ENST00000368977	+	925
chr2	162015652	162019941	chr2	162016808	162016809	ENST00000392749	+	1775	chr2	162162106	162166092	chr2	162164549	162164550	ENST00000409682	+	2000
chr2	44221473	44223881	chr2	44223143	44223144	ENST00000260665	-	1200	chr2	44394113	44397130	chr2	44395108	44395109	ENST00000419807	+	1975
chr2	69612909	69617025	chr2	69614381	69614382	ENST00000357308	-	1475	chr2	69662269	69666043	chr2	69664759	69664760	ENST00000410022	-	1125
chr2	69663883	69665999	chr2	69664759	69664760	ENST00000410022	-	1125	chr2	69870584	69872357	chr2	69870848	69870849	ENST00000406297	-	1625
chrX	129242976	129247481	chrX	129244690	129244691	ENST00000335997	-	1050	chrX	129401706	129404435	chrX	129402872	129402873	ENST00000370978	-	1125

## Sheet: K562 repl 2
ChIA-PET seg1 chr	ChIA-PET seg1 start	ChIA-PET seg1 end	Gene 1 chr	Gene 1 start	Gene 1 end	Gene 1 Transcript ID	Gene 1 Strand	Gene 1 Elongation Rate	ChIA-PET seg2 chr	ChIA-PET seg2 start	ChIA-PET seg2 end	Gene 2 chr	Gene 2 start	Gene 2 end	Gene 2 Transcript ID	Gene 2 Strand	Gene 2 Elongation Rate
chr6	13328740	13330326	chr6	13328775	13328776	ENST00000421203	-	850	chr6	13487032	13488615	chr6	13487786	13487787	ENST00000379287	-	900
chr12	111842188	111845185	chr12	111843752	111843753	ENST00000341259	+	1750	chr12	112122207	112124828	chr12	112123789	112123790	ENST00000419234	-	1350
chr12	72056600	72059234	chr12	72057748	72057749	ENST00000378743	-	1325	chr12	72232018	72235375	chr12	72233487	72233488	ENST00000482439	+	1225
chr1	165736523	165741866	chr1	165738416	165738417	ENST00000367881	-	1400	chr1	165791420	165802380	chr1	165796768	165796769	ENST00000367879	+	1625
chr4	10118457	10122021	chr4	10118572	10118573	ENST00000382451	-	875	chr9	33165887	33167387	chr9	33167353	33167354	ENST00000535206	-	1875
chr12	27165898	27169617	chr12	27167326	27167327	ENST00000343028	-	625	chr12	27175176	27177021	chr12	27175510	27175511	ENST00000538186	+	1300
chr10	98345052	98347789	chr10	98346808	98346809	ENST00000371142	-	1200	chr10	98590945	98593407	chr10	98592017	98592018	ENST00000540664	+	850
chr9	33023647	33028534	chr9	33025109	33025110	ENST00000495360	-	500	chr9	33288924	33292637	chr9	33290509	33290510	ENST00000379540	+	875
chr2	55643936	55648492	chr2	55647056	55647057	ENST00000436346	-	1700	chr2	55843198	55848689	chr2	55844757	55844758	ENST00000407823	-	800
chr4	10118457	10122021	chr4	10118572	10118573	ENST00000382451	-	875	chr9	33165887	33167387	chr9	33167353	33167354	ENST00000535206	-	1875
chr15	50977199	50981459	chr15	50979011	50979012	ENST00000313478	-	1250	chr15	51198510	51202863	chr15	51200869	51200870	ENST00000561441	+	975
chr15	50977419	50980911	chr15	50979011	50979012	ENST00000313478	-	1250	chr15	51055926	51058477	chr15	51058004	51058005	ENST00000261854	-	1850
chr8	41654853	41657297	chr8	41655139	41655140	ENST00000289734	-	1250	chr8	41908668	41911452	chr8	41909504	41909505	ENST00000396930	-	1775
chr5	43063723	43068505	chr5	43067520	43067521	ENST00000503152	-	650	chr5	43119531	43125230	chr5	43120985	43120986	ENST00000515326	+	1900
chr15	41624254	41626833	chr15	41624892	41624893	ENST00000260359	+	1000	chr15	41952098	41954867	chr15	41952610	41952611	ENST00000545763	+	1050
chr14	96826635	96830412	chr14	96830206	96830207	ENST00000359933	-	975	chr14	96966894	96969371	chr14	96968710	96968711	ENST00000216277	+	1550
chr1	206805970	206811025	chr1	206809073	206809074	ENST00000489878	+	1950	chr1	206856211	206859809	chr1	206858289	206858290	ENST00000294981	+	1300
chr5	81045316	81049074	chr5	81047615	81047616	ENST00000507655	-	1650	chr5	81266561	81269658	chr5	81267844	81267845	ENST00000282185	+	475
chr2	32233077	32237611	chr2	32236104	32236105	ENST00000490459	-	1350	chr2	32388376	32395245	chr2	32390933	32390934	ENST00000379343	+	1050
chr9	33166287	33168603	chr9	33167353	33167354	ENST00000535206	-	1875	chr9	34048845	34050506	chr9	34048946	34048947	ENST00000412543	-	675
chr2	55841795	55844862	chr2	55844757	55844758	ENST00000407823	-	800	chr2	55919047	55922552	chr2	55921044	55921045	ENST00000447944	-	1025
chr14	35341141	35345954	chr14	35344852	35344853	ENST00000358716	-	1475	chr14	35450498	35453739	chr14	35451163	35451164	ENST00000556994	+	1100
chr2	75873534	75875997	chr2	75873920	75873921	ENST00000358788	+	1850	chr2	75935285	75938167	chr2	75938114	75938115	ENST00000321027	-	1025
chr18	19282513	19287209	chr18	19284765	19284766	ENST00000289119	-	425	chr18	19319141	19326155	chr18	19321281	19321282	ENST00000261537	+	700
chr5	43120124	43122141	chr5	43120985	43120986	ENST00000515326	+	1900	chr5	43601364	43602944	chr5	43602825	43602826	ENST00000264663	+	1850
chr2	172015340	172019166	chr2	172017409	172017410	ENST00000409443	-	1950	chr2	172288878	172291883	chr2	172290727	172290728	ENST00000468592	+	725
chr2	191512066	191514391	chr2	191513796	191513797	ENST00000409581	+	1200	chr2	191745020	191746952	chr2	191745553	191745554	ENST00000320717	+	1775
chr5	133558168	133562305	chr5	133561761	133561762	ENST00000519718	-	1400	chr5	133704479	133709977	chr5	133706737	133706738	ENST00000519312	-	750
chr17	47753882	47755710	chr17	47755595	47755596	ENST00000504102	-	825	chr17	47840269	47842186	chr17	47841528	47841529	ENST00000240364	-	1100
chr1	89455399	89460038	chr1	89458603	89458604	ENST00000260508	-	1450	chr1	89988909	89992613	chr1	89990395	89990396	ENST00000449440	+	1275
chr5	115175649	115178515	chr5	115177178	115177179	ENST00000316788	+	1725	chr5	115418843	115420963	chr5	115420688	115420689	ENST00000274458	+	1475
chr2	191745546	191748320	chr2	191745553	191745554	ENST00000320717	+	1775	chr2	191878388	191879948	chr2	191878975	191878976	ENST00000361099	-	1750
chr3	9437420	9440401	chr3	9439299	9439300	ENST00000431285	+	1800	chr3	9833302	9836175	chr3	9834798	9834799	ENST00000397256	+	925
chr4	2468745	2470693	chr4	2470664	2470665	ENST00000314289	+	1875	chr4	3075535	3077781	chr4	3076408	3076409	ENST00000355072	+	1300
chr17	47840274	47849074	chr17	47841528	47841529	ENST00000240364	-	1100	chr17	47860146	47868686	chr17	47865917	47865918	ENST00000259021	+	1300
chr3	32610587	32613417	chr3	32612365	32612366	ENST00000273130	-	1050	chr3	32725009	32729374	chr3	32726637	32726638	ENST00000328834	+	850
chr4	48269261	48273807	chr4	48271880	48271881	ENST00000381501	-	1750	chr4	48342628	48344865	chr4	48343339	48343340	ENST00000264313	+	1625
chr1	241799658	241805161	chr1	241803700	241803701	ENST00000331838	-	1200	chr1	242010004	242013743	chr1	242011482	242011483	ENST00000366548	+	600
chr4	56813951	56816639	chr4	56815147	56815148	ENST00000257287	+	1625	chr4	57299941	57302593	chr4	57301780	57301781	ENST00000264220	-	1350
chr1	93543004	93547588	chr1	93544792	93544793	ENST00000545708	+	1625	chr1	93644888	93649088	chr1	93645476	93645477	ENST00000343253	+	925
chr15	80214626	80216603	chr15	80216095	80216096	ENST00000494999	-	725	chr15	80351131	80354263	chr15	80351910	80351911	ENST00000261749	+	1925
chr14	50698035	50701326	chr14	50698275	50698276	ENST00000216373	-	1900	chr14	50997416	51000897	chr14	50999326	50999327	ENST00000013125	-	1150
chr5	64858362	64860223	chr5	64858997	64858998	ENST00000396679	-	1200	chr5	65017877	65019974	chr5	65018861	65018862	ENST00000506816	-	1175
chr8	54929833	54936668	chr8	54935088	54935089	ENST00000521604	-	1325	chr8	55008421	55016367	chr8	55014576	55014577	ENST00000316963	-	1325
chr7	156685079	156687702	chr7	156685923	156685924	ENST00000353442	-	1425	chr7	156931318	156933656	chr7	156931607	156931608	ENST00000348165	+	725
chr5	64917667	64923522	chr5	64920543	64920544	ENST00000399438	+	875	chr5	65016940	65020557	chr5	65018861	65018862	ENST00000506816	-	1175
chr5	64919135	64922724	chr5	64920543	64920544	ENST00000399438	+	875	chr5	65220461	65223040	chr5	65222303	65222304	ENST00000284037	+	1225
chr12	69003403	69006194	chr12	69004619	69004620	ENST00000250559	+	1875	chr12	69079195	69083165	chr12	69080514	69080515	ENST00000229179	+	475
chr2	38824811	38832919	chr2	38830170	38830171	ENST00000409636	-	1775	chr2	38891494	38898299	chr2	38893052	38893053	ENST00000272252	+	975
chr18	33644702	33648119	chr18	33647518	33647519	ENST00000357384	-	1450	chr18	33708275	33713102	chr18	33709834	33709835	ENST00000358232	+	1175
chr8	141645434	141647078	chr8	141645717	141645718	ENST00000220592	-	975	chr8	142010947	142013143	chr8	142012314	142012315	ENST00000519635	-	1800
chr1	223897551	223903480	chr1	223900034	223900035	ENST00000295006	+	1025	chr1	224031634	224036730	chr1	224033673	224033674	ENST00000343537	-	1750
chr1	223899719	223901460	chr1	223900034	223900035	ENST00000295006	+	1025	chr1	224517221	224519970	chr1	224518088	224518089	ENST00000281701	-	1300
chr18	2567343	2572952	chr18	2571510	2571511	ENST00000261597	+	1025	chr18	2653160	2659276	chr18	2655737	2655738	ENST00000320876	+	1450
chr2	112811397	112814190	chr2	112812800	112812801	ENST00000283206	+	500	chr2	113032583	113035282	chr2	113033171	113033172	ENST00000409871	+	325
chr15	85254161	85262136	chr15	85259946	85259947	ENST00000268220	-	1050	chr15	85290291	85296068	chr15	85291866	85291867	ENST00000560079	+	1500
chr2	46655601	46658738	chr2	46656334	46656335	ENST00000432241	+	1525	chr2	47401405	47405423	chr2	47403649	47403650	ENST00000422269	-	1700
chr20	47661368	47666106	chr20	47662849	47662850	ENST00000262982	+	1325	chr20	47893455	47896736	chr20	47894962	47894963	ENST00000371754	-	1425
chr2	28973037	28974635	chr2	28974614	28974615	ENST00000358506	+	1825	chr2	29116147	29118811	chr2	29117509	29117510	ENST00000407426	+	1100
chr10	5725239	5729489	chr10	5726801	5726802	ENST00000328090	+	1550	chr10	5854026	5858186	chr10	5855511	5855512	ENST00000380191	-	1075
chr8	124407582	124409771	chr8	124408704	124408705	ENST00000287394	-	1250	chr8	125551311	125552847	chr8	125551349	125551350	ENST00000519776	-	850
chr5	72143873	72145498	chr5	72144011	72144012	ENST00000506351	+	1250	chr5	72250101	72252386	chr5	72251808	72251809	ENST00000430046	+	1450
chr1	101359897	101362477	chr1	101361632	101361633	ENST00000370112	+	900	chr1	101491360	101493490	chr1	101491409	101491410	ENST00000421013	+	1150
chrX	122991141	122995816	chrX	122993614	122993615	ENST00000481776	+	475	chrX	123092064	123098611	chrX	123094062	123094063	ENST00000394477	+	1325
chr20	47801433	47806666	chr20	47804903	47804904	ENST00000347458	-	925	chr20	47893282	47897820	chr20	47894962	47894963	ENST00000371754	-	1425
chr5	148929602	148931700	chr5	148931006	148931007	ENST00000377843	-	825	chr5	149379111	149381922	chr5	149379884	149379885	ENST00000503427	+	1100
chr17	58466748	58471032	chr17	58469585	58469586	ENST00000300896	-	1000	chr17	58675757	58680434	chr17	58677554	58677555	ENST00000305921	+	1300
chr12	112545046	112548067	chr12	112546825	112546826	ENST00000261745	-	1150	chr12	112854865	112857931	chr12	112856713	112856714	ENST00000392597	+	1050
chr2	9561815	9564875	chr2	9563697	9563698	ENST00000238112	+	425	chr2	9694626	9697191	chr2	9695916	9695917	ENST00000310823	-	1325
chr8	42396719	42398250	chr8	42397068	42397069	ENST00000342228	-	1250	chr8	42750185	42752521	chr8	42752075	42752076	ENST00000307602	+	1375
chr2	70314442	70315943	chr2	70315685	70315686	ENST00000452431	-	1000	chr2	70474249	70476321	chr2	70475746	70475747	ENST00000470096	-	925
chr10	35377865	35383094	chr10	35379569	35379570	ENST00000374742	-	1200	chr10	35412073	35418081	chr10	35415719	35415720	ENST00000474362	+	1750
chr17	58601329	58603637	chr17	58603579	58603580	ENST00000083182	-	1025	chr17	58676639	58679390	chr17	58677554	58677555	ENST00000305921	+	1300
chr10	35412816	35416736	chr10	35415719	35415720	ENST00000474362	+	1750	chr10	35624437	35628621	chr10	35625455	35625456	ENST00000537547	+	2000
chr10	5853820	5856785	chr10	5855511	5855512	ENST00000380191	-	1075	chr10	5927225	5934067	chr10	5931535	5931536	ENST00000397269	+	850
chr20	35722438	35726012	chr20	35724397	35724398	ENST00000373664	-	1125	chr20	35804541	35808946	chr20	35807449	35807450	ENST00000237530	+	1200
chr14	78173879	78175943	chr14	78174446	78174447	ENST00000557431	+	825	chr14	78227117	78229069	chr14	78227549	78227550	ENST00000556428	-	1275
chr10	70285774	70291034	chr10	70287230	70287231	ENST00000265870	-	1075	chr10	70479458	70484700	chr10	70480971	70480972	ENST00000535016	+	200
chr10	70285802	70288824	chr10	70287230	70287231	ENST00000265870	-	1075	chr10	70319712	70324486	chr10	70320413	70320414	ENST00000373644	+	1400
chr1	114352160	114355349	chr1	114355097	114355098	ENST00000261441	-	1675	chr1	114470537	114474785	chr1	114471814	114471815	ENST00000426820	+	1475
chr5	134094468	134096365	chr5	134094469	134094470	ENST00000507392	+	750	chr5	134239035	134243277	chr5	134240596	134240597	ENST00000254908	+	225
chr4	39977713	39980866	chr4	39979575	39979576	ENST00000503396	-	1450	chr4	40055919	40060719	chr4	40058446	40058447	ENST00000261435	+	1200
chr1	15849258	15854851	chr1	15853308	15853309	ENST00000375847	+	900	chr1	15942112	15946103	chr1	15943995	15943996	ENST00000480945	+	1225
chr2	135674847	135678060	chr2	135676395	135676396	ENST00000264157	+	1675	chr2	136497995	136501131	chr2	136499189	136499190	ENST00000272638	+	825
chr4	83931921	83937558	chr4	83934078	83934079	ENST00000505397	-	1675	chr4	83953101	83959226	chr4	83955600	83955601	ENST00000509093	+	1825
chr9	37591526	37594216	chr9	37592465	37592466	ENST00000537239	-	1100	chr9	37800380	37802270	chr9	37800499	37800500	ENST00000377724	+	725
chr1	15853064	15855379	chr1	15853308	15853309	ENST00000375847	+	900	chr1	16009770	16011766	chr1	16010827	16010828	ENST00000375799	+	1425
chr14	31494077	31496185	chr14	31495606	31495607	ENST00000355683	-	825	chr14	31924915	31927180	chr14	31926646	31926647	ENST00000549185	-	1125
chr6	18153965	18157193	chr6	18155560	18155561	ENST00000546309	+	325	chr6	18263570	18266002	chr6	18265053	18265054	ENST00000397239	-	1675
chr3	148802720	148804559	chr3	148804340	148804341	ENST00000494055	-	1550	chr3	148846293	148848405	chr3	148847371	148847372	ENST00000296051	+	725
chr3	25704790	25709183	chr3	25706397	25706398	ENST00000424225	-	1500	chr3	25829377	25833826	chr3	25831529	25831530	ENST00000417874	-	1700
chr11	67979628	67982546	chr11	67981294	67981295	ENST00000405515	-	1550	chr11	68226210	68228969	chr11	68228186	68228187	ENST00000393799	+	1325
chr13	32888444	32890889	chr13	32889611	32889612	ENST00000380152	+	975	chr13	33111217	33113600	chr13	33112969	33112970	ENST00000505213	-	1475
chr12	45609285	45610968	chr12	45609770	45609771	ENST00000426898	+	1825	chr12	46122757	46125582	chr12	46123448	46123449	ENST00000334344	+	1700
chr4	1280807	1287593	chr4	1283639	1283640	ENST00000303400	+	1250	chr4	1339102	1342185	chr4	1341104	1341105	ENST00000389851	+	825
chr3	33480023	33482778	chr3	33482001	33482002	ENST00000283628	-	1700	chr3	33758096	33760043	chr3	33759847	33759848	ENST00000359576	-	1550
chr3	33480110	33483332	chr3	33482001	33482002	ENST00000283628	-	1700	chr3	33838735	33842108	chr3	33839844	33839845	ENST00000307296	+	1225
chr10	74383666	74388308	chr10	74385898	74385899	ENST00000398761	-	1400	chr10	74449711	74453703	chr10	74451889	74451890	ENST00000373053	+	1250
chr3	142296202	142300183	chr3	142297667	142297668	ENST00000350721	-	625	chr3	142719946	142722583	chr3	142720010	142720011	ENST00000488497	+	2400
chr21	47700722	47725192	chr21	47706210	47706211	ENST00000397708	-	275	chr21	47732201	47746452	chr21	47744036	47744037	ENST00000359568	+	775
chr16	88849284	88851697	chr16	88851618	88851619	ENST00000301015	-	700	chr16	89573205	89575505	chr16	89574811	89574812	ENST00000268704	+	625
chr10	104677277	104680103	chr10	104678071	104678072	ENST00000433628	+	950	chr10	104951263	104955052	chr10	104953055	104953056	ENST00000343289	-	875
chr1	160229896	160233471	chr1	160232320	160232321	ENST00000461888	-	825	chr1	160311813	160316142	chr1	160313189	160313190	ENST00000241704	-	1100
chr1	35733114	35735615	chr1	35734568	35734569	ENST00000373297	+	1225	chr1	36021870	36024653	chr1	36023550	36023551	ENST00000482929	-	1000
chr1	247092220	247095330	chr1	247094725	247094726	ENST00000326225	-	1550	chr1	247240373	247243272	chr1	247242112	247242113	ENST00000474541	-	1500
chr1	220215698	220221065	chr1	220219999	220220000	ENST00000366923	-	1600	chr1	220265352	220268996	chr1	220267444	220267445	ENST00000366922	+	725
chr13	45914582	45916629	chr13	45915480	45915481	ENST00000517509	+	1950	chr13	46038923	46040637	chr13	46039060	46039061	ENST00000349995	+	625
chr4	106064984	106068563	chr4	106067032	106067033	ENST00000305737	+	1675	chr4	106391196	106395238	chr4	106395237	106395238	ENST00000341695	-	900
chr7	137684812	137687576	chr7	137686812	137686813	ENST00000456390	-	1025	chr7	138144415	138146987	chr7	138144953	138144954	ENST00000439939	+	1275
chr1	33114800	33118900	chr1	33116165	33116166	ENST00000341885	-	525	chr1	33279496	33283190	chr1	33283043	33283044	ENST00000373476	+	275
chrX	21856289	21858306	chrX	21857754	21857755	ENST00000379484	+	1600	chrX	21957584	21960343	chrX	21958691	21958692	ENST00000404933	+	1325
chr6	154830235	154832774	chr6	154831792	154831793	ENST00000367213	-	1575	chr6	155632741	155637829	chr6	155635617	155635618	ENST00000470239	-	625
chr3	121263260	121265570	chr3	121264852	121264853	ENST00000264233	-	950	chr3	121468289	121470216	chr3	121468601	121468602	ENST00000340645	-	1475
chr3	121263813	121266298	chr3	121264852	121264853	ENST00000264233	-	950	chr3	122398939	122401596	chr3	122399465	122399466	ENST00000474629	+	850
chr3	33758608	33761315	chr3	33759847	33759848	ENST00000359576	-	1550	chr3	33838493	33843542	chr3	33839844	33839845	ENST00000307296	+	1225
chr19	47612465	47619414	chr19	47617008	47617009	ENST00000253048	-	650	chr19	47632168	47638152	chr19	47634080	47634081	ENST00000270225	+	1225
chr21	38335964	38340655	chr21	38338772	38338773	ENST00000399120	-	450	chr21	38443691	38447862	chr21	38445526	38445527	ENST00000492275	+	1600
chr2	99951256	99955616	chr2	99953816	99953817	ENST00000289371	+	1425	chr2	100104663	100107649	chr2	100106496	100106497	ENST00000258428	-	1750
chr3	130565352	130573718	chr3	130569439	130569440	ENST00000505330	+	1450	chr3	130610339	130615552	chr3	130612812	130612813	ENST00000510168	+	1475
chr21	38337159	38340523	chr21	38338772	38338773	ENST00000399120	-	450	chr21	38639649	38641465	chr21	38640261	38640262	ENST00000288304	-	1175
chr5	172409189	172411791	chr5	172410760	172410761	ENST00000519374	+	1325	chr5	172481493	172484933	chr5	172483355	172483356	ENST00000296953	+	1150
chr1	36021752	36025417	chr1	36023550	36023551	ENST00000482929	-	1000	chr1	36105374	36108281	chr1	36107444	36107445	ENST00000373237	-	1575
chr1	36021814	36029097	chr1	36023550	36023551	ENST00000482929	-	1000	chr1	36232663	36236662	chr1	36235567	36235568	ENST00000251195	-	975
chr1	244613646	244616557	chr1	244615435	244615436	ENST00000366535	-	1000	chr1	244814602	244816452	chr1	244816237	244816238	ENST00000302550	+	1100
chr2	44221420	44223881	chr2	44223143	44223144	ENST00000260665	-	1200	chr2	44394320	44398193	chr2	44395108	44395109	ENST00000419807	+	1975
chr9	114933563	114944810	chr9	114937687	114937688	ENST00000374270	-	1875	chr9	115090209	115098217	chr9	115095946	115095947	ENST00000374257	-	1450
chr19	32833696	32838236	chr19	32836514	32836515	ENST00000355898	+	1000	chr19	32895025	32898554	chr19	32896655	32896656	ENST00000392250	+	1075
chr8	95564422	95566417	chr8	95565756	95565757	ENST00000421249	-	1000	chr8	95730460	95733624	chr8	95732128	95732129	ENST00000414645	+	925
chr2	44221645	44223272	chr2	44223143	44223144	ENST00000260665	-	1200	chr2	44586548	44589504	chr2	44589000	44589001	ENST00000541738	-	1125
chr21	38444186	38447384	chr21	38445526	38445527	ENST00000492275	+	1600	chr21	38738430	38741405	chr21	38739236	38739237	ENST00000462274	+	2175
chr10	65022204	65029560	chr10	65029012	65029013	ENST00000489372	-	1675	chr10	65279716	65284311	chr10	65281123	65281124	ENST00000373758	+	825
chr7	27700432	27708426	chr7	27702613	27702614	ENST00000265395	-	725	chr7	27777901	27782637	chr7	27778992	27778993	ENST00000543117	+	1825
chr17	42974022	42977909	chr17	42976992	42976993	ENST00000426333	-	1225	chr17	43136841	43140138	chr17	43138680	43138681	ENST00000258960	+	1050
chr15	49913123	49914709	chr15	49913127	49913128	ENST00000299338	-	650	chr15	50646540	50648629	chr15	50647604	50647605	ENST00000380877	-	1050
chr10	89575231	89578479	chr10	89577916	89577917	ENST00000541004	-	1250	chr10	89619975	89624868	chr10	89622870	89622871	ENST00000371953	+	1350
chr10	43132863	43135217	chr10	43134000	43134001	ENST00000486187	-	925	chr10	43276470	43279459	chr10	43278249	43278250	ENST00000374518	+	1500
chr6	35887479	35890120	chr6	35889118	35889119	ENST00000373825	-	900	chr6	35993309	35995768	chr6	35995488	35995489	ENST00000229795	+	1100
chr2	160141845	160145757	chr2	160143309	160143310	ENST00000359774	-	1150	chr2	160566526	160571127	chr2	160569000	160569001	ENST00000409175	+	1675
chr9	26891080	26894676	chr9	26892801	26892802	ENST00000333916	-	1550	chr9	26945695	26949113	chr9	26947460	26947461	ENST00000397292	-	1200
chr18	9612893	9615735	chr18	9614566	9614567	ENST00000400555	-	1100	chr18	9913834	9918265	chr18	9913999	9914000	ENST00000400000	+	1600
chr11	46613853	46617362	chr11	46615674	46615675	ENST00000526606	-	1425	chr11	46635690	46640935	chr11	46638826	46638827	ENST00000312040	+	975
chr2	65356141	65360291	chr2	65357239	65357240	ENST00000409784	-	1675	chr2	65452726	65456913	chr2	65454887	65454888	ENST00000260641	+	1700
chr2	65356982	65359033	chr2	65357239	65357240	ENST00000409784	-	1675	chr2	65662303	65664227	chr2	65663864	65663865	ENST00000377977	+	725
chr6	15087697	15092455	chr6	15090233	15090234	ENST00000437648	-	50	chr6	15243972	15249952	chr6	15246527	15246528	ENST00000341776	+	1500
chr10	97845791	97859010	chr10	97849994	97849995	ENST00000427846	-	1350	chr10	97880529	97895862	chr10	97889829	97889830	ENST00000563195	+	1150
chr15	59038832	59043387	chr15	59042176	59042177	ENST00000260408	-	1300	chr15	59060936	59065101	chr15	59063391	59063392	ENST00000316848	+	975
chr21	36255360	36267040	chr21	36262086	36262087	ENST00000399237	-	1450	chr21	36420190	36430639	chr21	36421640	36421641	ENST00000300305	-	725
chr2	65453380	65455005	chr2	65454887	65454888	ENST00000260641	+	1700	chr2	65658705	65661221	chr2	65659770	65659771	ENST00000440972	-	1475
chr15	59040867	59044243	chr15	59042176	59042177	ENST00000260408	-	1300	chr15	59224539	59228117	chr15	59225851	59225852	ENST00000380516	-	1050
chr15	59061870	59064465	chr15	59063391	59063392	ENST00000316848	+	975	chr15	59224425	59227494	chr15	59225851	59225852	ENST00000380516	-	1050
chr2	128783877	128788222	chr2	128785693	128785694	ENST00000259234	-	1350	chr2	128846975	128851345	chr2	128848782	128848783	ENST00000375990	+	1450
chr3	99534048	99538188	chr3	99536678	99536679	ENST00000421999	+	1025	chr3	99977608	99981959	chr3	99979845	99979846	ENST00000344949	+	1150
chr3	99535720	99537944	chr3	99536678	99536679	ENST00000421999	+	1025	chr3	99593016	99595642	chr3	99595016	99595017	ENST00000476723	-	1100
chr15	41406809	41409126	chr15	41408551	41408552	ENST00000361937	-	1350	chr15	41623521	41625356	chr15	41624892	41624893	ENST00000260359	+	1000
chr15	75744354	75750304	chr15	75748182	75748183	ENST00000564778	-	1300	chr15	75868474	75873810	chr15	75871629	75871630	ENST00000306726	-	1650
chr17	61627562	61629542	chr17	61627822	61627823	ENST00000310827	+	1375	chr17	61850975	61852538	chr17	61851223	61851224	ENST00000578681	+	1300
chr4	146017952	146021540	chr4	146019692	146019693	ENST00000514390	-	1150	chr4	146097765	146102674	chr4	146101312	146101313	ENST00000447906	-	1175
chr15	59223432	59227578	chr15	59225851	59225852	ENST00000380516	-	1050	chr15	59278800	59283796	chr15	59279854	59279855	ENST00000348370	+	925
chr18	19177796	19182313	chr18	19180844	19180845	ENST00000383276	-	725	chr18	19281680	19287045	chr18	19284765	19284766	ENST00000289119	-	425
chr7	135192580	135199898	chr7	135194874	135194875	ENST00000541284	-	1925	chr7	135241029	135245122	chr7	135242667	135242668	ENST00000285968	+	900
chr18	19178370	19182563	chr18	19180844	19180845	ENST00000383276	-	725	chr18	19319737	19322777	chr18	19321281	19321282	ENST00000261537	+	700
chr7	135241103	135243857	chr7	135242667	135242668	ENST00000285968	+	900	chr7	138144835	138146589	chr7	138144953	138144954	ENST00000439939	+	1275
chr3	183351567	183358573	chr3	183353356	183353357	ENST00000242810	+	1125	chr3	183413516	183419709	chr3	183415606	183415607	ENST00000421660	+	950
chr8	109259292	109263385	chr8	109260993	109260994	ENST00000220849	-	1750	chr8	109455685	109457590	chr8	109455853	109455854	ENST00000220853	+	1275
chr7	138792396	138794845	chr7	138794464	138794465	ENST00000471652	-	1575	chr7	138914992	138917092	chr7	138916231	138916232	ENST00000473989	+	1350
chr5	32171905	32175684	chr5	32174455	32174456	ENST00000265070	-	1075	chr5	32310804	32314904	chr5	32313114	32313115	ENST00000382142	-	1400
chr6	3062660	3066459	chr6	3064092	3064093	ENST00000490396	+	1775	chr6	3257231	3260578	chr6	3259218	3259219	ENST00000451246	+	1375
chr1	222789930	222793106	chr1	222791428	222791429	ENST00000344922	+	625	chr1	222884660	222888170	chr1	222886525	222886526	ENST00000541237	-	1200
chr4	56408119	56414507	chr4	56413304	56413305	ENST00000513440	-	1325	chr4	56501105	56505595	chr4	56502864	56502865	ENST00000515325	-	1150
chr3	183601171	183604224	chr3	183602695	183602696	ENST00000421484	-	775	chr3	183851056	183853772	chr3	183853164	183853165	ENST00000444495	+	300
chr2	26099365	26101887	chr2	26101384	26101385	ENST00000435504	-	575	chr2	26567639	26570410	chr2	26568982	26568983	ENST00000260585	+	1125
chr2	26099681	26102019	chr2	26101384	26101385	ENST00000435504	-	575	chr2	26465177	26467699	chr2	26467593	26467594	ENST00000380649	-	1275
chr3	37031851	37036203	chr3	37034823	37034824	ENST00000231790	+	450	chr3	37282148	37286160	chr3	37284668	37284669	ENST00000361924	+	1475
chr2	26099758	26102429	chr2	26101384	26101385	ENST00000435504	-	575	chr2	26255125	26257695	chr2	26256976	26256977	ENST00000495146	+	1750
chr20	30308843	30313531	chr20	30311702	30311703	ENST00000450273	-	1375	chr20	30325014	30327607	chr20	30327074	30327075	ENST00000340513	+	975
chr7	138915328	138918110	chr7	138916231	138916232	ENST00000473989	+	1350	chr7	139043279	139045783	chr7	139044627	139044628	ENST00000545899	+	1600
chr10	32214247	32219889	chr10	32217741	32217742	ENST00000375250	-	1700	chr10	32343249	32346468	chr10	32345358	32345359	ENST00000302418	-	2100
chr1	21111442	21114909	chr1	21113180	21113181	ENST00000312239	-	1600	chr1	21500351	21504664	chr1	21503376	21503377	ENST00000438975	-	325
chr6	34663461	34666396	chr6	34664635	34664636	ENST00000374026	-	1375	chr6	34758437	34761219	chr6	34759857	34759858	ENST00000192788	+	1325
chr7	141249872	141253308	chr7	141250989	141250990	ENST00000355413	+	925	chr7	141437084	141440415	chr7	141438200	141438201	ENST00000465582	+	850
chr19	34660596	34663463	chr19	34663352	34663353	ENST00000433627	+	1325	chr19	34744304	34746801	chr19	34745456	34745457	ENST00000299505	+	1500
chr10	975330	979545	chr10	977563	977564	ENST00000406525	-	1475	chr10	1093428	1097529	chr10	1095478	1095479	ENST00000358220	+	75
chr10	120838983	120842269	chr10	120840395	120840396	ENST00000478852	-	1150	chr10	121301551	121304359	chr10	121302219	121302220	ENST00000369103	-	800
chr3	45428528	45430901	chr3	45429998	45429999	ENST00000265537	+	625	chr3	45730247	45732727	chr3	45730678	45730679	ENST00000455997	+	1300
chr7	30322727	30327025	chr7	30323923	30323924	ENST00000323037	+	1400	chr7	30633926	30636255	chr7	30634358	30634359	ENST00000426529	-	375
chr19	34662882	34664929	chr19	34663352	34663353	ENST00000433627	+	1325	chr19	34918251	34920859	chr19	34919268	34919269	ENST00000246548	+	1300
chr2	162015485	162017212	chr2	162016808	162016809	ENST00000392749	+	1775	chr2	162163510	162166162	chr2	162164549	162164550	ENST00000409682	+	2000
chr6	36408851	36410684	chr6	36410544	36410545	ENST00000373731	+	600	chr6	36512554	36515336	chr6	36515246	36515247	ENST00000229812	-	800
chr12	50793053	50795901	chr12	50794592	50794593	ENST00000293618	+	1575	chr12	51566225	51568182	chr12	51566925	51566926	ENST00000307660	-	700
chr7	148394356	148398513	chr7	148395006	148395007	ENST00000409469	+	1900	chr7	148578679	148582076	chr7	148581412	148581413	ENST00000483012	-	1700
chr2	32390024	32393805	chr2	32390933	32390934	ENST00000379343	+	1050	chr2	32579476	32583220	chr2	32582096	32582097	ENST00000421745	+	1725
chr5	71613435	71616158	chr5	71616087	71616088	ENST00000261413	-	1075	chr5	72143869	72145952	chr5	72144011	72144012	ENST00000506351	+	1250
chr3	135968756	135970580	chr3	135969148	135969149	ENST00000251654	+	850	chr3	136469634	136471998	chr3	136471219	136471220	ENST00000483235	-	1400
chr3	43659494	43665311	chr3	43663559	43663560	ENST00000292246	-	1425	chr3	43727005	43736111	chr3	43733085	43733086	ENST00000413397	-	675
chr7	129708706	129714129	chr7	129710350	129710351	ENST00000335420	+	625	chr7	129843017	129846378	chr7	129845337	129845338	ENST00000397622	-	1075
chr7	129709377	129711430	chr7	129710350	129710351	ENST00000335420	+	625	chr7	130353122	130354797	chr7	130353597	130353598	ENST00000445977	-	800
chr10	27149519	27151430	chr10	27150015	27150016	ENST00000376134	-	1225	chr10	27442633	27444807	chr10	27443320	27443321	ENST00000376016	-	1075
chr12	22695391	22699021	chr12	22697479	22697480	ENST00000333957	-	725	chr12	22777286	22782111	chr12	22778009	22778010	ENST00000266517	+	1325
chr3	43730945	43733881	chr3	43733085	43733086	ENST00000413397	-	675	chr3	45635413	45637345	chr3	45635816	45635817	ENST00000440097	+	525
chr7	7220051	7223731	chr7	7222178	7222179	ENST00000419721	+	1350	chr7	7605300	7608795	chr7	7606503	7606504	ENST00000340080	+	1175
chr8	42127352	42129955	chr8	42128820	42128821	ENST00000520810	+	1025	chr8	42395816	42398257	chr8	42397068	42397069	ENST00000342228	-	1250
chr9	33815280	33818952	chr9	33817565	33817566	ENST00000263228	+	825	chr9	34047029	34050085	chr9	34048946	34048947	ENST00000412543	-	675
chr3	171527254	171529928	chr3	171528283	171528284	ENST00000351298	-	1750	chr3	171757375	171759841	chr3	171757418	171757419	ENST00000392699	+	1075
chr10	94327650	94337583	chr10	94333832	94333833	ENST00000265986	-	900	chr10	94349444	94356782	chr10	94353043	94353044	ENST00000260731	+	1650
chr1	53192078	53193660	chr1	53192126	53192127	ENST00000443756	+	800	chr1	53307310	53309935	chr1	53308183	53308184	ENST00000371532	+	375
chr2	86329731	86334667	chr2	86333277	86333278	ENST00000263857	-	875	chr2	86420655	86424478	chr2	86422892	86422893	ENST00000410111	-	1350
chr12	42631625	42634573	chr12	42632150	42632151	ENST00000547254	-	900	chr12	42719114	42721447	chr12	42719947	42719948	ENST00000337898	+	1375
chr4	140096440	140103076	chr4	140098371	140098372	ENST00000394235	-	1375	chr4	140214696	140225790	chr4	140222609	140222610	ENST00000296543	+	1775
chr4	140097646	140100442	chr4	140098371	140098372	ENST00000394235	-	1375	chr4	146019350	146021178	chr4	146019692	146019693	ENST00000514390	-	1150
chr11	59381725	59384642	chr11	59383616	59383617	ENST00000263847	-	1050	chr11	59521273	59522941	chr11	59522532	59522533	ENST00000535361	+	1400
chr15	60688529	60691878	chr15	60690940	60690941	ENST00000559818	-	2475	chr15	60766241	60773283	chr15	60771358	60771359	ENST00000558181	-	1225
chr9	34047473	34050641	chr9	34048946	34048947	ENST00000412543	-	675	chr9	34124831	34127851	chr9	34126770	34126771	ENST00000361264	-	575
chr13	20355577	20357406	chr13	20357081	20357082	ENST00000492741	-	175	chr13	20530666	20533432	chr13	20532810	20532811	ENST00000456228	+	1275
chr13	20436209	20441183	chr13	20437775	20437776	ENST00000337963	-	1250	chr13	20530618	20534459	chr13	20532810	20532811	ENST00000456228	+	1275
chr9	34126336	34130562	chr9	34126770	34126771	ENST00000361264	-	575	chr9	34177385	34180421	chr9	34179003	34179004	ENST00000543944	+	1325
chr7	44644815	44647580	chr7	44646171	44646172	ENST00000439616	+	375	chr7	45038441	45040648	chr7	45039074	45039075	ENST00000461377	+	850
chrX	16735999	16737875	chrX	16737755	16737756	ENST00000380155	+	1400	chrX	16803308	16805594	chrX	16804550	16804551	ENST00000380122	+	1050
chr2	170428924	170430949	chr2	170430382	170430383	ENST00000453153	-	825	chr2	170549755	170552419	chr2	170550998	170550999	ENST00000498202	+	1475
chr2	170439391	170443277	chr2	170440850	170440851	ENST00000260970	+	1875	chr2	170549649	170553715	chr2	170550998	170550999	ENST00000498202	+	1475
chr2	86421282	86424146	chr2	86422892	86422893	ENST00000410111	-	1350	chr2	86666466	86669906	chr2	86667924	86667925	ENST00000409556	+	1400
chr11	32455369	32457971	chr11	32457175	32457176	ENST00000332351	-	375	chr11	32914210	32916339	chr11	32914724	32914725	ENST00000399302	+	1575
chr5	65016308	65023363	chr5	65018861	65018862	ENST00000506816	-	1175	chr5	65219800	65223290	chr5	65222303	65222304	ENST00000284037	+	1225
chr9	102580574	102584384	chr9	102582170	102582171	ENST00000427039	-	775	chr9	102666062	102670667	chr9	102668915	102668916	ENST00000259400	+	1225
chr9	102667836	102670748	chr9	102668915	102668916	ENST00000259400	+	1225	chr9	102860445	102862735	chr9	102861321	102861322	ENST00000262455	-	1575
chr11	63437372	63440690	chr11	63439380	63439381	ENST00000538786	-	1475	chr11	63447067	63450757	chr11	63448918	63448919	ENST00000341307	+	1475
chr3	196465094	196468043	chr3	196466728	196466729	ENST00000327134	+	1575	chr3	196593106	196596082	chr3	196594727	196594728	ENST00000323460	+	1675
chr3	196465513	196467927	chr3	196466728	196466729	ENST00000327134	+	1575	chr3	197025635	197027437	chr3	197026170	197026171	ENST00000419354	-	1050
chr4	39639094	39642097	chr4	39640709	39640710	ENST00000295958	-	600	chr4	39698280	39701920	chr4	39699664	39699665	ENST00000261427	+	1300
chr4	39639464	39642394	chr4	39640709	39640710	ENST00000295958	-	600	chr4	39978102	39980155	chr4	39979575	39979576	ENST00000503396	-	1450
chr2	86667867	86670714	chr2	86667924	86667925	ENST00000409556	+	1400	chr2	86788591	86792016	chr2	86790601	86790602	ENST00000409225	-	1225
chr10	12083149	12085486	chr10	12085022	12085023	ENST00000397053	-	1550	chr10	12235252	12239976	chr10	12237965	12237966	ENST00000281141	+	1275
chr1	173990484	173993026	chr1	173991434	173991435	ENST00000367696	-	1475	chr1	174127463	174130354	chr1	174128548	174128549	ENST00000367689	+	1600
chr11	32911083	32916400	chr11	32914724	32914725	ENST00000399302	+	1575	chr11	33180278	33184105	chr11	33183010	33183011	ENST00000323959	-	1075
chr4	83818320	83823399	chr4	83821690	83821691	ENST00000355196	-	750	chr4	83953805	83956068	chr4	83955600	83955601	ENST00000509093	+	1825
chr4	83818419	83823984	chr4	83821690	83821691	ENST00000355196	-	750	chr4	83930294	83935873	chr4	83934078	83934079	ENST00000505397	-	1675
chr2	200774987	200778331	chr2	200776029	200776030	ENST00000491721	+	1725	chr2	200817667	200821783	chr2	200820544	200820545	ENST00000435773	+	1200
chr4	39698746	39703482	chr4	39699664	39699665	ENST00000261427	+	1300	chr4	39975273	39980796	chr4	39979575	39979576	ENST00000503396	-	1450
chr17	37604291	37611614	chr17	37607538	37607539	ENST00000300651	-	1225	chr17	37614953	37621274	chr17	37617764	37617765	ENST00000584632	+	1200
chr1	200584468	200597925	chr1	200589861	200589862	ENST00000367350	-	650	chr1	200636691	200644850	chr1	200639034	200639035	ENST00000447706	-	600
chr16	71840441	71845295	chr16	71843103	71843104	ENST00000299980	-	1575	chr16	71875076	71881716	chr16	71879899	71879900	ENST00000568581	+	1150
chr14	100437751	100440854	chr14	100437786	100437787	ENST00000402714	+	1950	chr14	100704855	100707872	chr14	100705322	100705323	ENST00000262238	+	1475
chr10	112404113	112406427	chr10	112404155	112404156	ENST00000369519	+	1150	chr10	112678273	112680530	chr10	112679301	112679302	ENST00000265277	+	1650
chr6	17987419	17989888	chr6	17987799	17987800	ENST00000259711	-	1050	chr6	18153354	18156770	chr6	18155560	18155561	ENST00000546309	+	325
chr2	113031437	113035560	chr2	113033171	113033172	ENST00000409871	+	325	chr2	113235674	113241590	chr2	113239731	113239732	ENST00000233336	+	425
chr1	212963280	212966676	chr1	212965123	212965124	ENST00000366976	-	1100	chr1	213030010	213031803	chr1	213031597	213031598	ENST00000366971	+	1125
chr15	66676900	66684455	chr15	66679155	66679156	ENST00000307102	+	1575	chr15	66793843	66798884	chr15	66797297	66797298	ENST00000307897	+	800
chr2	208393409	208398111	chr2	208394461	208394462	ENST00000430624	+	650	chr2	208487941	208492263	chr2	208490651	208490652	ENST00000461419	-	1650
chr15	69110605	69113594	chr15	69113233	69113234	ENST00000465139	-	1300	chr15	70389451	70391767	chr15	70390514	70390515	ENST00000558939	-	1250
chr16	69457237	69459987	chr16	69458428	69458429	ENST00000512062	+	575	chr16	69598210	69601258	chr16	69598997	69598998	ENST00000426654	+	1500
chr11	33180160	33185398	chr11	33183010	33183011	ENST00000323959	-	1075	chr11	33277230	33283289	chr11	33278218	33278219	ENST00000525975	+	1650
chr5	96142546	96145890	chr5	96143802	96143803	ENST00000296754	-	475	chr5	96269908	96273049	chr5	96271168	96271169	ENST00000231368	+	1575
chr1	35496262	35498706	chr1	35497568	35497569	ENST00000357182	-	275	chr1	35734132	35735806	chr1	35734568	35734569	ENST00000373297	+	1225
chr12	64796580	64799507	chr12	64798130	64798131	ENST00000332707	+	600	chr12	65002415	65006757	chr12	65004293	65004294	ENST00000283172	+	1550
chr12	49759487	49762377	chr12	49760367	49760368	ENST00000550997	+	925	chr12	49960316	49963479	chr12	49962155	49962156	ENST00000551063	+	800
chr12	122906748	122909467	chr12	122907178	122907179	ENST00000537178	-	1125	chr12	123010139	123012944	chr12	123011795	123011796	ENST00000450485	+	825
chr9	114244232	114247127	chr9	114247024	114247025	ENST00000259335	-	1375	chr9	114936385	114938566	chr9	114937687	114937688	ENST00000374270	-	1875
chr15	22832161	22834976	chr15	22833395	22833396	ENST00000283645	+	800	chr15	23809532	23812738	chr15	23810864	23810865	ENST00000568252	+	1250
chr15	22833288	22835832	chr15	22833395	22833396	ENST00000283645	+	800	chr15	25682909	25685402	chr15	25684127	25684128	ENST00000232165	-	1850
chr5	59993591	59996148	chr5	59996016	59996017	ENST00000512452	-	1675	chr5	60625919	60628980	chr5	60628100	60628101	ENST00000252744	+	800
chr15	66793522	66799444	chr15	66797297	66797298	ENST00000307897	+	800	chr15	66872351	66878445	chr15	66874528	66874529	ENST00000558797	+	1400
chr22	41863491	41865993	chr22	41865129	41865130	ENST00000216254	+	550	chr22	42016312	42017907	chr22	42017123	42017124	ENST00000360079	+	225
chr6	111135057	111138352	chr6	111136839	111136840	ENST00000323817	-	950	chr6	111300336	111305241	chr6	111303218	111303219	ENST00000441448	+	1125
chr1	117602357	117604689	chr1	117602925	117602926	ENST00000369466	+	825	chr1	117909021	117911097	chr1	117910071	117910072	ENST00000356554	+	1375
chr1	10002125	10006916	chr1	10003486	10003487	ENST00000377205	+	750	chr1	10090169	10095056	chr1	10092890	10092891	ENST00000253251	+	1050
chr3	38204959	38208361	chr3	38206996	38206997	ENST00000311806	+	1250	chr3	38387281	38390806	chr3	38388270	38388271	ENST00000207870	+	575
chr1	226496316	226500064	chr1	226497569	226497570	ENST00000366808	-	1450	chr1	226594874	226597502	chr1	226595773	226595774	ENST00000366794	-	1175
chr3	56589231	56591997	chr3	56591189	56591190	ENST00000422222	+	1175	chr3	56715959	56718849	chr3	56717264	56717265	ENST00000355628	-	700
chr10	70319409	70322069	chr10	70320413	70320414	ENST00000373644	+	1400	chr10	70479677	70483102	chr10	70480971	70480972	ENST00000535016	+	200
chr1	182756027	182763148	chr1	182758428	182758429	ENST00000488424	+	1100	chr1	182807078	182810527	chr1	182808504	182808505	ENST00000367549	+	1750
chr15	91071878	91074664	chr15	91073157	91073158	ENST00000420329	+	1175	chr15	91258815	91261307	chr15	91260558	91260559	ENST00000355112	+	400
chr13	52022042	52032158	chr13	52027342	52027343	ENST00000398119	-	525	chr13	52153162	52160287	chr13	52158644	52158645	ENST00000298125	+	1825
chr1	22108444	22111873	chr1	22110098	22110099	ENST00000308271	-	1525	chr1	22262277	22265220	chr1	22263789	22263790	ENST00000374695	-	825
chr1	182807227	182809028	chr1	182808504	182808505	ENST00000367549	+	1750	chr1	183441270	183442858	chr1	183441351	183441352	ENST00000440812	+	1875
chr4	123746736	123750864	chr4	123747863	123747864	ENST00000264498	+	1450	chr4	123840711	123845484	chr4	123844229	123844230	ENST00000274008	+	1200
chr10	70479705	70483685	chr10	70480971	70480972	ENST00000535016	+	200	chr10	70659589	70663421	chr10	70661034	70661035	ENST00000373585	+	800
chr7	102788448	102791390	chr7	102790006	102790007	ENST00000427257	-	1025	chr7	104652074	104655160	chr7	104654626	104654627	ENST00000311117	+	1700
chr5	36150463	36155255	chr5	36152062	36152063	ENST00000296603	-	1150	chr5	36239958	36244873	chr5	36242380	36242381	ENST00000506945	-	2500
chr6	149638315	149640262	chr6	149639063	149639064	ENST00000392282	+	1725	chr6	149865472	149868393	chr6	149867173	149867174	ENST00000253329	-	1375
chr12	77156431	77159064	chr12	77157368	77157369	ENST00000426126	+	875	chr12	77458434	77460478	chr12	77459359	77459360	ENST00000322886	-	1000
chr14	81684220	81688666	chr14	81687574	81687575	ENST00000434192	-	950	chr14	81897892	81904337	chr14	81902808	81902809	ENST00000557055	-	1925
chr3	142297625	142299268	chr3	142297667	142297668	ENST00000350721	-	625	chr3	142441632	142444151	chr3	142442916	142442917	ENST00000476941	+	1775
chr5	145213194	145215106	chr5	145214898	145214899	ENST00000394450	-	900	chr5	145826697	145828661	chr5	145826875	145826876	ENST00000296702	+	1750
chr7	128864343	128867175	chr7	128864864	128864865	ENST00000325006	+	825	chr7	129072018	129074296	chr7	129074274	129074275	ENST00000249344	+	575
chr5	132297305	132301142	chr5	132299325	132299326	ENST00000265343	-	1300	chr5	132385282	132390417	chr5	132387654	132387655	ENST00000304858	+	1475
chr15	63479864	63482985	chr15	63481668	63481669	ENST00000321437	+	1700	chr15	63793210	63797772	chr15	63796793	63796794	ENST00000561442	+	1950
chr3	93690937	93695495	chr3	93692909	93692910	ENST00000394236	-	850	chr3	93697759	93704969	chr3	93698983	93698984	ENST00000535334	+	1225
chr1	115052311	115054439	chr1	115053780	115053781	ENST00000358465	-	1425	chr1	115300345	115302265	chr1	115300647	115300648	ENST00000530886	-	1425
chr8	48870843	48877121	chr8	48872742	48872743	ENST00000338368	-	875	chr8	48919292	48922738	chr8	48920960	48920961	ENST00000523111	+	425
chr13	26793083	26801415	chr13	26796397	26796398	ENST00000468480	-	1050	chr13	26825834	26832689	chr13	26828276	26828277	ENST00000381527	+	1850
chr4	106393678	106396634	chr4	106395237	106395238	ENST00000341695	-	900	chr4	106628055	106631625	chr4	106629941	106629942	ENST00000394730	+	1525
chr20	56883375	56886482	chr20	56884752	56884753	ENST00000244040	+	1100	chr20	56963345	56965601	chr20	56964178	56964179	ENST00000475243	+	925
chr1	180470531	180473320	chr1	180472088	180472089	ENST00000367595	-	975	chr1	180599332	180602016	chr1	180601140	180601141	ENST00000367590	+	1550
chrX	117479619	117481223	chrX	117480036	117480037	ENST00000371822	+	1675	chrX	117628262	117630078	chrX	117629861	117629862	ENST00000276204	+	800
chr6	108580082	108586644	chr6	108582463	108582464	ENST00000230085	-	1525	chr6	108614136	108617455	chr6	108616098	108616099	ENST00000368977	+	925
chr4	154264522	154268548	chr4	154265801	154265802	ENST00000240488	+	1175	chr4	154385275	154389203	chr4	154387498	154387499	ENST00000440693	+	1350
chr3	155520264	155525290	chr3	155524139	155524140	ENST00000340171	-	975	chr3	155586627	155590296	chr3	155588325	155588326	ENST00000496455	+	1800
chr2	109064175	109068533	chr2	109065684	109065685	ENST00000309863	+	950	chr2	109149203	109153356	chr2	109150857	109150858	ENST00000544547	+	1600
chr3	160164471	160170330	chr3	160167616	160167617	ENST00000483754	-	1425	chr3	160281681	160284179	chr3	160283375	160283376	ENST00000334256	-	1500
chr2	69611274	69616119	chr2	69614381	69614382	ENST00000357308	-	1475	chr2	69662269	69666448	chr2	69664759	69664760	ENST00000410022	-	1125
chr2	69613154	69616986	chr2	69614381	69614382	ENST00000357308	-	1475	chr2	69869935	69872343	chr2	69870848	69870849	ENST00000406297	-	1625
chr3	49375789	49379333	chr3	49377503	49377504	ENST00000265560	-	150	chr3	49446166	49450939	chr3	49449634	49449635	ENST00000418115	-	1500
chr6	119253238	119258280	chr6	119256326	119256327	ENST00000316316	-	1175	chr6	119398045	119402661	chr6	119400343	119400344	ENST00000522284	-	525
chr11	77530642	77533546	chr11	77532062	77532063	ENST00000308488	-	1450	chr11	77704642	77706251	chr11	77705723	77705724	ENST00000534064	-	1175
chr9	123340964	123342609	chr9	123342436	123342437	ENST00000359309	-	1200	chr9	123476353	123477974	chr9	123476747	123476748	ENST00000373930	-	1175
chr7	66055866	66057599	chr7	66057372	66057373	ENST00000445080	-	1675	chr7	66093523	66095048	chr7	66093945	66093946	ENST00000503687	+	325
chr5	122756839	122761083	chr5	122759285	122759286	ENST00000508442	-	1250	chr5	122845404	122850551	chr5	122847793	122847794	ENST00000345990	+	1750
chr21	38634322	38645742	chr21	38640261	38640262	ENST00000288304	-	1175	chr21	38735546	38748285	chr21	38739236	38739237	ENST00000462274	+	2175
chr3	15468176	15471042	chr3	15469024	15469025	ENST00000443029	-	2200	chr3	15641904	15643672	chr3	15643337	15643338	ENST00000321169	-	600
chr5	31530526	31533342	chr5	31532215	31532216	ENST00000513349	-	650	chr5	32444212	32445882	chr5	32444866	32444867	ENST00000265069	-	1350
chr6	119398174	119401168	chr6	119400343	119400344	ENST00000522284	-	525	chr6	119668507	119671059	chr6	119670925	119670926	ENST00000368468	-	1325
chr5	68529171	68532388	chr5	68530700	68530701	ENST00000256443	+	1375	chr5	68663415	68666737	chr5	68665124	68665125	ENST00000361732	+	1050
chr1	36333189	36339262	chr1	36335409	36335410	ENST00000373206	+	1275	chr1	36394402	36398629	chr1	36396319	36396320	ENST00000324350	+	1750
chr15	72667344	72672450	chr15	72668321	72668322	ENST00000379915	-	1075	chr15	72764755	72768100	chr15	72766667	72766668	ENST00000379887	+	1600
chr7	103628555	103630772	chr7	103629962	103629963	ENST00000343529	-	1525	chr7	103847007	103849982	chr7	103848494	103848495	ENST00000297431	-	1300
chr15	55580643	55583951	chr15	55582010	55582011	ENST00000567639	-	1300	chr15	55698978	55701737	chr15	55700707	55700708	ENST00000310958	-	1500
chr7	35733382	35737253	chr7	35734744	35734745	ENST00000396081	-	825	chr7	35839254	35842258	chr7	35840542	35840543	ENST00000435235	+	1800
chr17	76776844	76781459	chr17	76778375	76778376	ENST00000361101	-	1075	chr17	76834498	76839265	chr17	76836968	76836969	ENST00000312010	-	1450
chr15	72764850	72767674	chr15	72766667	72766668	ENST00000379887	+	1600	chr15	72977020	72979928	chr15	72978527	72978528	ENST00000566400	+	1075
chr8	90996289	90998136	chr8	90996943	90996944	ENST00000265433	-	1450	chr8	91010778	91015164	chr8	91013633	91013634	ENST00000220764	+	1650
chr2	114512680	114516386	chr2	114514399	114514400	ENST00000245680	-	1450	chr2	114646106	114650521	chr2	114647537	114647538	ENST00000263238	+	1725
chr15	50644809	50652796	chr15	50647604	50647605	ENST00000380877	-	1050	chr15	50713240	50720627	chr15	50716579	50716580	ENST00000433963	+	1650
chr15	50647013	50649194	chr15	50647604	50647605	ENST00000380877	-	1050	chr15	51198882	51202798	chr15	51200869	51200870	ENST00000561441	+	975
chr3	15641810	15644272	chr3	15643337	15643338	ENST00000321169	-	600	chr3	15900625	15902511	chr3	15901277	15901278	ENST00000399451	-	1600
chr5	112255209	112259355	chr5	112258235	112258236	ENST00000379638	-	1375	chr5	112310614	112316433	chr5	112312399	112312400	ENST00000515408	+	1475

## Sheet: MCF7 repl 1
ChIA-PET seg1 chr	ChIA-PET seg1 start	ChIA-PET seg1 end	Gene 1 chr	Gene 1 start	Gene 1 end	Gene 1 Transcript ID	Gene 1 Strand	Gene 1 Elongation Rate	ChIA-PET seg2 chr	ChIA-PET seg2 start	ChIA-PET seg2 end	Gene 2 chr	Gene 2 start	Gene 2 end	Gene 2 Transcript ID	Gene 2 Strand	Gene 2 Elongation Rate
chr20	48328931	48332299	chr20	48330414	48330415	ENST00000371711	-	1750	chr20	48426801	48431256	chr20	48429250	48429251	ENST00000417961	+	1275
chr13	42533627	42539202	chr13	42535255	42535256	ENST00000281496	-	2050	chr13	42612890	42617176	chr13	42614176	42614177	ENST00000540693	+	2425
chr4	99180743	99183219	chr4	99182535	99182536	ENST00000509011	+	1625	chr4	99577927	99581407	chr4	99579779	99579780	ENST00000305798	-	2100
chr1	33004144	33006150	chr1	33005028	33005029	ENST00000373510	+	1250	chr1	33115381	33117896	chr1	33116165	33116166	ENST00000341885	-	1950
chr20	30311032	30313647	chr20	30311702	30311703	ENST00000450273	-	1400	chr20	30325586	30328091	chr20	30327074	30327075	ENST00000340513	+	1975
chr13	20433394	20441385	chr13	20437775	20437776	ENST00000337963	-	1825	chr13	20530970	20536915	chr13	20532810	20532811	ENST00000456228	+	1875
chr18	59854059	59857015	chr18	59854507	59854508	ENST00000398130	+	1850	chr18	60190247	60191883	chr18	60190658	60190659	ENST00000269499	+	1825
chr17	61698424	61701375	chr17	61699775	61699776	ENST00000579585	+	1725	chr17	61850463	61852159	chr17	61851223	61851224	ENST00000578681	+	1375
chr7	148580640	148582279	chr7	148581412	148581413	ENST00000483012	-	2275	chr7	148822807	148824608	chr7	148823508	148823509	ENST00000426851	+	3950
chr16	75017075	75020366	chr16	75019045	75019046	ENST00000262144	-	1425	chr16	75030262	75034812	chr16	75032928	75032929	ENST00000335325	+	1600
chr2	109063389	109068951	chr2	109065684	109065685	ENST00000309863	+	1225	chr2	109150008	109153300	chr2	109150857	109150858	ENST00000544547	+	1575
chr12	110432767	110435191	chr12	110434193	110434194	ENST00000338373	-	1650	chr12	110435535	110437668	chr12	110437328	110437329	ENST00000261739	+	1400
chr19	47615673	47618715	chr19	47617008	47617009	ENST00000253048	-	1175	chr19	47632962	47636037	chr19	47634080	47634081	ENST00000270225	+	1650
chr9	80644449	80646704	chr9	80646373	80646374	ENST00000286548	-	1975	chr9	86322574	86325176	chr9	86323117	86323118	ENST00000376395	-	2075
chr14	77786039	77790135	chr14	77787226	77787227	ENST00000261534	-	1675	chr14	77842733	77846742	chr14	77843451	77843452	ENST00000216468	-	1825
chr1	224301568	224304233	chr1	224301789	224301790	ENST00000366862	+	2100	chr1	224516678	224521021	chr1	224518088	224518089	ENST00000281701	-	1750
chr14	100703922	100708157	chr14	100705322	100705323	ENST00000262238	+	2150	chr14	100838866	100844203	chr14	100843141	100843142	ENST00000355338	-	1650
chr17	49197967	49200195	chr17	49198225	49198226	ENST00000357122	-	1900	chr17	49334994	49337654	chr17	49337397	49337398	ENST00000405860	-	1900
chr2	128784501	128787545	chr2	128785693	128785694	ENST00000259234	-	2000	chr2	128846646	128851122	chr2	128848782	128848783	ENST00000375990	+	1750
chr4	186123382	186126233	chr4	186125154	186125155	ENST00000458385	-	1725	chr4	186128719	186132428	chr4	186131233	186131234	ENST00000264694	+	1975
chr7	103848404	103850130	chr7	103848494	103848495	ENST00000297431	-	1850	chr7	104653038	104655393	chr7	104654626	104654627	ENST00000311117	+	2050
chr14	50777451	50780075	chr14	50779265	50779266	ENST00000267436	-	1150	chr14	50997479	51002496	chr14	50999326	50999327	ENST00000013125	-	2175
chr6	122930685	122932214	chr6	122931377	122931378	ENST00000368448	+	1775	chr6	125522291	125524947	chr6	125524785	125524786	ENST00000392482	+	1825
chr8	54933970	54936104	chr8	54935088	54935089	ENST00000521604	-	2275	chr8	55012695	55015394	chr8	55014576	55014577	ENST00000316963	-	1525
chr12	67460777	67464522	chr12	67462941	67462942	ENST00000535721	-	1925	chr12	67661841	67665703	chr12	67663061	67663062	ENST00000545606	+	2000
chr8	12989391	12992386	chr8	12990982	12990983	ENST00000358919	-	2350	chr8	13133755	13135559	chr8	13134381	13134382	ENST00000503161	-	1950
chr14	78173969	78175847	chr14	78174446	78174447	ENST00000557431	+	1200	chr14	78226797	78229509	chr14	78227549	78227550	ENST00000556428	-	1275
chr1	200589488	200591524	chr1	200589861	200589862	ENST00000367350	-	1075	chr1	200707035	200710017	chr1	200708686	200708687	ENST00000358823	+	2100
chr14	78227205	78229069	chr14	78227549	78227550	ENST00000556428	-	1275	chr14	78264195	78266638	chr14	78266426	78266427	ENST00000238561	+	1150
chr1	117602515	117604525	chr1	117602925	117602926	ENST00000369466	+	1225	chr12	39835821	39838061	chr12	39837191	39837192	ENST00000395670	-	1950
chr1	117602515	117604525	chr1	117602925	117602926	ENST00000369466	+	1225	chr12	39835821	39838061	chr12	39837191	39837192	ENST00000395670	-	1950
chr17	57695500	57699459	chr17	57697219	57697220	ENST00000393043	+	1650	chr17	57781824	57786560	chr17	57784863	57784864	ENST00000262291	+	2125
chr2	9695084	9698053	chr2	9695916	9695917	ENST00000310823	-	2075	chr2	9768518	9772298	chr2	9771142	9771143	ENST00000238081	-	2125
chr1	200637298	200641368	chr1	200639034	200639035	ENST00000447706	-	1700	chr1	200706768	200710535	chr1	200708686	200708687	ENST00000358823	+	2100
chr8	103874643	103878099	chr8	103876646	103876647	ENST00000520750	+	1850	chr8	104031324	104040310	chr8	104033291	104033292	ENST00000395862	+	1650
chr16	88919664	88925769	chr16	88923373	88923374	ENST00000268695	-	2200	chr16	89001749	89010428	chr16	89008251	89008252	ENST00000569443	-	2225
chr3	155522507	155525053	chr3	155524139	155524140	ENST00000340171	-	975	chr3	155587874	155590161	chr3	155588325	155588326	ENST00000496455	+	2200
chr20	46129760	46132390	chr20	46130601	46130602	ENST00000341724	+	1800	chr7	148394543	148396970	chr7	148395006	148395007	ENST00000409469	+	2100
chr20	46129760	46132390	chr20	46130601	46130602	ENST00000341724	+	1800	chr7	148394543	148396970	chr7	148395006	148395007	ENST00000409469	+	2100
chr20	46129895	46131495	chr20	46130601	46130602	ENST00000341724	+	1800	chr4	143394020	143396583	chr4	143395560	143395561	ENST00000507861	-	2050
chr20	46129895	46131495	chr20	46130601	46130602	ENST00000341724	+	1800	chr4	143394020	143396583	chr4	143395560	143395561	ENST00000507861	-	2050
chr14	55736296	55738259	chr14	55738021	55738022	ENST00000313833	+	1825	chr14	55878149	55880015	chr14	55878575	55878576	ENST00000247178	-	1750
chr5	179332761	179336643	chr5	179334858	179334859	ENST00000356834	-	775	chr5	179497180	179500753	chr5	179499117	179499118	ENST00000521389	-	2050
chr17	27716727	27718261	chr17	27717482	27717483	ENST00000583121	+	1700	chr17	28618323	28619907	chr17	28619011	28619012	ENST00000261714	-	1500
chr4	140097375	140100797	chr4	140098371	140098372	ENST00000394235	-	1700	chr4	140220598	140223663	chr4	140222609	140222610	ENST00000296543	+	1925
chr6	125474508	125477741	chr6	125474795	125474796	ENST00000304877	+	2125	chr6	125520403	125525367	chr6	125524785	125524786	ENST00000392482	+	1825
chr17	57782257	57785043	chr17	57784863	57784864	ENST00000262291	+	2125	chr17	58675822	58678726	chr17	58677554	58677555	ENST00000305921	+	1975
chr10	12083133	12086740	chr10	12085022	12085023	ENST00000397053	-	1675	chr10	12169505	12173055	chr10	12171693	12171694	ENST00000475268	+	1300
chr10	12083987	12086384	chr10	12085022	12085023	ENST00000397053	-	1675	chr10	12109270	12112336	chr10	12110971	12110972	ENST00000263035	+	1450
chr1	165736117	165742504	chr1	165738416	165738417	ENST00000367881	-	1725	chr1	165795129	165799551	chr1	165796768	165796769	ENST00000367879	+	2025
chr4	85503339	85505737	chr4	85504132	85504133	ENST00000295887	+	2150	chr4	85885750	85887907	chr4	85887543	85887544	ENST00000322366	-	1850
chr22	19418393	19421734	chr22	19419255	19419256	ENST00000263208	-	1300	chr22	19464783	19467639	chr22	19466982	19466983	ENST00000407835	+	950
chr6	136870900	136872951	chr6	136871645	136871646	ENST00000354570	-	1825	chr6	137112840	137115547	chr6	137113655	137113656	ENST00000359015	-	1825
chr21	45138839	45140766	chr21	45138978	45138979	ENST00000468090	+	1550	chr21	45430959	45433329	chr21	45432200	45432201	ENST00000380221	+	2125
chr15	72666408	72669827	chr15	72668321	72668322	ENST00000379915	-	2050	chr15	72764535	72767754	chr15	72766667	72766668	ENST00000379887	+	2125
chr5	112255914	112262078	chr5	112258235	112258236	ENST00000379638	-	1650	chr5	112308752	112315375	chr5	112312399	112312400	ENST00000515408	+	1975
chrX	122992845	122995841	chrX	122993614	122993615	ENST00000481776	+	1950	chrX	123092948	123095576	chrX	123094062	123094063	ENST00000394477	+	2300
chr14	57045463	57047102	chr14	57046338	57046339	ENST00000556422	+	1950	chr14	57734184	57735935	chr14	57735725	57735726	ENST00000413566	-	1700
chr10	88516322	88518890	chr10	88516396	88516397	ENST00000224764	+	2175	chr10	88854485	88856534	chr10	88854622	88854623	ENST00000277865	-	1200
chr6	143264696	143268807	chr6	143266337	143266338	ENST00000367603	-	1800	chr6	143380557	143382998	chr6	143381633	143381634	ENST00000367601	+	1925
chr6	82955425	82959972	chr6	82957470	82957471	ENST00000369751	-	775	chr6	83771309	83777168	chr6	83775559	83775560	ENST00000369747	-	1325
chr5	145560893	145564215	chr5	145562222	145562223	ENST00000394434	-	1475	chr5	145581108	145584712	chr5	145583113	145583114	ENST00000506502	+	2075
chr6	137111408	137117328	chr6	137113655	137113656	ENST00000359015	-	1825	chr6	137142474	137145434	chr6	137143718	137143719	ENST00000541292	+	1625
chr8	124406056	124410111	chr8	124408704	124408705	ENST00000287394	-	1625	chr8	124427174	124433258	chr8	124429043	124429044	ENST00000523551	+	1500
chr10	32345103	32347823	chr10	32345358	32345359	ENST00000302418	-	1950	chr10	32633996	32636266	chr10	32636145	32636146	ENST00000319778	-	1950
chr1	229642575	229645818	chr1	229644102	229644103	ENST00000537506	-	1425	chr1	229693196	229695179	chr1	229694441	229694442	ENST00000344517	-	1450
chr1	115049560	115054996	chr1	115053780	115053781	ENST00000358465	-	2225	chr1	115294579	115300903	chr1	115300647	115300648	ENST00000530886	-	1850
chr11	34071981	34076766	chr11	34073230	34073231	ENST00000341394	+	1875	chr11	34377622	34383038	chr11	34379554	34379555	ENST00000435224	-	1700
chr10	89577120	89579087	chr10	89577916	89577917	ENST00000541004	-	1975	chr10	89622150	89625835	chr10	89622870	89622871	ENST00000371953	+	1800
chr14	35341954	35346847	chr14	35344852	35344853	ENST00000358716	-	1825	chr14	35449484	35456301	chr14	35451163	35451164	ENST00000556994	+	1750
chr1	227914603	227917495	chr1	227916358	227916359	ENST00000366760	+	1875	chr9	137216399	137218458	chr9	137218426	137218427	ENST00000481739	+	1975
chr10	98345733	98347828	chr10	98346808	98346809	ENST00000371142	-	1950	chr10	98591279	98593531	chr10	98592017	98592018	ENST00000540664	+	2075
chr1	227914603	227917495	chr1	227916358	227916359	ENST00000366760	+	1875	chr9	137216399	137218458	chr9	137218426	137218427	ENST00000481739	+	1975
chr2	36582902	36585503	chr2	36583069	36583070	ENST00000280527	+	2425	chr2	36823410	36825462	chr2	36825333	36825334	ENST00000379245	-	1575
chr6	111801592	111806250	chr6	111804917	111804918	ENST00000422377	-	1775	chr6	111925243	111928870	chr6	111927480	111927481	ENST00000340026	-	2125
chr12	112818536	112821691	chr12	112819895	112819896	ENST00000430131	-	1425	chr12	112855148	112858870	chr12	112856713	112856714	ENST00000392597	+	2150
chr10	103454583	103456115	chr10	103455109	103455110	ENST00000457105	-	2000	chr10	103814430	103816165	chr10	103815949	103815950	ENST00000370033	-	1725
chr16	69457747	69460846	chr16	69458428	69458429	ENST00000512062	+	1475	chr16	69598845	69601292	chr16	69598997	69598998	ENST00000426654	+	1900
chr3	107808899	107810783	chr3	107809871	107809872	ENST00000355354	-	1625	chr3	107940985	107942597	chr3	107941416	107941417	ENST00000264538	-	1450
chr16	67839053	67840612	chr16	67840554	67840555	ENST00000317506	-	1650	chr20	39655961	39658134	chr20	39657458	39657459	ENST00000361337	+	2125
chr16	67839053	67840612	chr16	67840554	67840555	ENST00000317506	-	1650	chr20	39655961	39658134	chr20	39657458	39657459	ENST00000361337	+	2125
chr19	32895532	32897847	chr19	32896655	32896656	ENST00000392250	+	1125	chr9	12774427	12776236	chr9	12775020	12775021	ENST00000319264	+	2100
chr7	73866692	73868617	chr7	73868120	73868121	ENST00000265755	+	2225	chr7	74071624	74074077	chr7	74072011	74072012	ENST00000324896	+	1900
chr19	32895532	32897847	chr19	32896655	32896656	ENST00000392250	+	1125	chr9	12774427	12776236	chr9	12775020	12775021	ENST00000319264	+	2100
chr14	45602054	45606945	chr14	45605150	45605151	ENST00000267430	+	1900	chr14	45719959	45724414	chr14	45722604	45722605	ENST00000310806	-	2250
chr9	26890485	26893190	chr9	26892801	26892802	ENST00000333916	-	1575	chr9	26945159	26948755	chr9	26947460	26947461	ENST00000397292	-	2100
chr12	100533484	100538154	chr12	100536625	100536626	ENST00000279907	-	2575	chr12	100588934	100594603	chr12	100593643	100593644	ENST00000553038	+	1825
chr12	100536226	100538052	chr12	100536625	100536626	ENST00000279907	-	2575	chr12	100658648	100661410	chr12	100660918	100660919	ENST00000549687	+	2025
chr14	73493361	73495952	chr14	73493919	73493920	ENST00000556143	-	1400	chr14	73523861	73525725	chr14	73525144	73525145	ENST00000261973	+	2150
chr17	57969459	57971899	chr17	57970447	57970448	ENST00000472940	+	2250	chr17	58677248	58679868	chr17	58677554	58677555	ENST00000305921	+	1975
chr17	57969572	57971751	chr17	57970447	57970448	ENST00000472940	+	2250	chr17	58467597	58470105	chr17	58469585	58469586	ENST00000300896	-	1075
chr1	62187463	62192137	chr1	62191094	62191095	ENST00000294613	-	1775	chr1	62206143	62210486	chr1	62208149	62208150	ENST00000371158	+	1700
chr12	64796880	64798880	chr12	64798130	64798131	ENST00000332707	+	2125	chr12	65173888	65175730	chr12	65174589	65174590	ENST00000229088	+	1775
chr12	64797372	64804702	chr12	64798130	64798131	ENST00000332707	+	2125	chr12	64843540	64848189	chr12	64845660	64845661	ENST00000331710	+	1850
chr3	49377084	49379212	chr3	49377503	49377504	ENST00000265560	-	2100	chr3	49447955	49450362	chr3	49449634	49449635	ENST00000418115	-	1800
chr14	89882240	89884795	chr14	89883455	89883456	ENST00000557258	-	1100	chr14	90421029	90422786	chr14	90421283	90421284	ENST00000554976	+	1350
chr7	98739614	98743126	chr7	98741722	98741723	ENST00000361125	-	1725	chr7	98922770	98926033	chr7	98923521	98923522	ENST00000432884	+	1625
chr2	86421023	86423048	chr2	86422892	86422893	ENST00000410111	-	2175	chr2	86667398	86669941	chr2	86667924	86667925	ENST00000409556	+	1450
chr13	113861684	113863401	chr13	113862552	113862553	ENST00000375441	+	1350	chr13	114143189	114146068	chr13	114145310	114145311	ENST00000434316	+	1325
chr3	99534190	99537845	chr3	99536678	99536679	ENST00000421999	+	1375	chr3	99978822	99982000	chr3	99979845	99979846	ENST00000344949	+	1725
chr2	153030659	153033731	chr2	153032505	153032506	ENST00000263904	-	1450	chr2	153574261	153576507	chr2	153574494	153574495	ENST00000410080	-	2100
chr9	131216844	131218603	chr9	131218408	131218409	ENST00000351030	+	775	chr9	131313869	131316297	chr9	131314866	131314867	ENST00000358161	+	1800
chr17	1463781	1466863	chr17	1466109	1466110	ENST00000313486	-	1075	chr17	1531949	1534809	chr17	1532179	1532180	ENST00000574743	-	1775
chr1	193025349	193030732	chr1	193029236	193029237	ENST00000367452	-	1775	chr1	193089240	193093287	chr1	193091147	193091148	ENST00000367435	+	1675
chr8	90766360	90773428	chr8	90769954	90769955	ENST00000519655	-	1550	chr8	90991217	91000142	chr8	90996943	90996944	ENST00000265433	-	1450
chr7	128693684	128696131	chr7	128695197	128695198	ENST00000471234	-	1800	chr7	128863096	128865879	chr7	128864864	128864865	ENST00000325006	+	1625
chr8	109258714	109262520	chr8	109260993	109260994	ENST00000220849	-	2050	chr8	109453543	109457951	chr8	109455853	109455854	ENST00000220853	+	1575
chr22	29137399	29139735	chr22	29138409	29138410	ENST00000544772	-	1800	chr22	29278518	29281229	chr22	29279580	29279581	ENST00000544604	+	2175
chr18	9331992	9337338	chr18	9334765	9334766	ENST00000262120	+	1475	chr18	9472584	9477624	chr18	9475007	9475008	ENST00000019317	+	2150
chr6	36409344	36412329	chr6	36410544	36410545	ENST00000373731	+	1550	chr6	36513269	36516052	chr6	36515246	36515247	ENST00000229812	-	1600
chr20	47441771	47448256	chr20	47444419	47444420	ENST00000396220	-	1850	chr20	47536367	47541512	chr20	47538427	47538428	ENST00000371917	+	1275
chr20	33679107	33681022	chr20	33680673	33680674	ENST00000252015	-	1600	chr20	34041980	34044795	chr20	34043150	34043151	ENST00000397527	+	2050
chr1	93913059	93915471	chr1	93913658	93913659	ENST00000370256	+	1625	chr1	94146480	94149352	chr1	94147384	94147385	ENST00000260502	-	1725
chr8	102503375	102506182	chr8	102504660	102504661	ENST00000251808	+	1775	chrX	131157229	131158900	chrX	131157293	131157294	ENST00000394334	+	1775
chr8	102503375	102506182	chr8	102504660	102504661	ENST00000251808	+	1775	chrX	131157229	131158900	chrX	131157293	131157294	ENST00000394334	+	1775
chr19	4908118	4910059	chr19	4909510	4909511	ENST00000396708	+	800	chr19	4969029	4971300	chr19	4969124	4969125	ENST00000159111	+	1225
chr12	42536402	42539877	chr12	42538680	42538681	ENST00000398675	-	2025	chr12	42717128	42721445	chr12	42719947	42719948	ENST00000337898	+	2100
chr12	42537005	42540223	chr12	42538680	42538681	ENST00000398675	-	2025	chr12	42630265	42633071	chr12	42632150	42632151	ENST00000547254	-	900
chr3	122232375	122235171	chr3	122233791	122233792	ENST00000465882	-	2025	chr3	122398224	122401586	chr3	122399465	122399466	ENST00000474629	+	900
chr3	160281928	160283694	chr3	160283375	160283376	ENST00000334256	-	1875	chr3	160472203	160475526	chr3	160473390	160473391	ENST00000497343	+	1050
chr15	50977319	50980700	chr15	50979011	50979012	ENST00000313478	-	2000	chr15	51053372	51060901	chr15	51058004	51058005	ENST00000261854	-	1950
chr15	50977442	50979922	chr15	50979011	50979012	ENST00000313478	-	2000	chr15	51198976	51201748	chr15	51200869	51200870	ENST00000561441	+	1750
chr12	42630581	42632543	chr12	42632150	42632151	ENST00000547254	-	900	chr12	42717454	42720310	chr12	42719947	42719948	ENST00000337898	+	2100
chr1	235490053	235491954	chr1	235491533	235491534	ENST00000349213	-	1800	chr1	235667113	235670108	chr1	235667780	235667781	ENST00000366600	-	2075
chr1	235490705	235493817	chr1	235491533	235491534	ENST00000349213	-	1800	chr1	235529430	235532385	chr1	235530675	235530676	ENST00000366601	+	1425
chr3	31572844	31575028	chr3	31574130	31574131	ENST00000453168	+	2000	chr4	106066590	106069409	chr4	106067032	106067033	ENST00000305737	+	2050
chr3	31572844	31575028	chr3	31574130	31574131	ENST00000453168	+	2000	chr4	106066590	106069409	chr4	106067032	106067033	ENST00000305737	+	2050
chr20	25369196	25373772	chr20	25371618	25371619	ENST00000376542	-	1850	chr20	25386901	25390344	chr20	25388363	25388364	ENST00000262460	+	1225
chr7	135190229	135200151	chr7	135194874	135194875	ENST00000541284	-	1875	chr7	135241123	135251277	chr7	135242667	135242668	ENST00000285968	+	1900
chr12	22695340	22700495	chr12	22697479	22697480	ENST00000333957	-	725	chr12	22774918	22784949	chr12	22778009	22778010	ENST00000266517	+	2275
chr10	121628603	121637253	chr10	121633132	121633133	ENST00000466047	-	2100	chr10	121649257	121658259	chr10	121652223	121652224	ENST00000369075	+	1400
chr8	90993651	90998172	chr8	90996943	90996944	ENST00000265433	-	1450	chr8	91012740	91014695	chr8	91013633	91013634	ENST00000220764	+	1500
chr11	67979114	67981303	chr11	67981294	67981295	ENST00000405515	-	1825	chr11	68226653	68229689	chr11	68228186	68228187	ENST00000393799	+	1400
chr20	47803145	47805210	chr20	47804903	47804904	ENST00000347458	-	2275	chr20	47893851	47896625	chr20	47894962	47894963	ENST00000371754	-	1925
chr5	122756731	122763368	chr5	122759285	122759286	ENST00000508442	-	1325	chr5	122844715	122850112	chr5	122847793	122847794	ENST00000345990	+	2000
chr10	43132020	43136600	chr10	43134000	43134001	ENST00000486187	-	1125	chr10	43277441	43279853	chr10	43278249	43278250	ENST00000374518	+	1775
chr2	114510034	114517579	chr2	114514399	114514400	ENST00000245680	-	1925	chr2	114643441	114655407	chr2	114647537	114647538	ENST00000263238	+	1775
chr1	114352067	114356642	chr1	114355097	114355098	ENST00000261441	-	2050	chr1	114470131	114477025	chr1	114471814	114471815	ENST00000426820	+	1975
chr10	5725427	5729550	chr10	5726801	5726802	ENST00000328090	+	1850	chr10	5853446	5856157	chr10	5855511	5855512	ENST00000380191	-	1950
chr1	15943247	15945109	chr1	15943995	15943996	ENST00000480945	+	1800	chr1	16010439	16012353	chr1	16010827	16010828	ENST00000375799	+	1675
chr10	94332407	94336018	chr10	94333832	94333833	ENST00000265986	-	1525	chr10	94349212	94353201	chr10	94353043	94353044	ENST00000260731	+	1750
chr3	172467247	172468788	chr3	172468472	172468473	ENST00000232458	+	1625	chr3	179370430	179372469	chr3	179370543	179370544	ENST00000263966	+	2225
chr1	114353223	114356831	chr1	114355097	114355098	ENST00000261441	-	2050	chr1	115298921	115302043	chr1	115300647	115300648	ENST00000530886	-	1850
chr1	114354399	114356647	chr1	114355097	114355098	ENST00000261441	-	2050	chr1	115051838	115054168	chr1	115053780	115053781	ENST00000358465	-	2225
chr8	103422749	103426860	chr8	103425068	103425069	ENST00000520539	-	1850	chr8	103874401	103878662	chr8	103876646	103876647	ENST00000520750	+	1850
chr10	94332956	94335217	chr10	94333832	94333833	ENST00000265986	-	1525	chr10	94607050	94609174	chr10	94608242	94608243	ENST00000371543	+	1625
chr10	94351156	94354361	chr10	94353043	94353044	ENST00000260731	+	1750	chr10	94606648	94609927	chr10	94608242	94608243	ENST00000371543	+	1625
chr10	976200	979208	chr10	977563	977564	ENST00000406525	-	2175	chr10	1093606	1097726	chr10	1095478	1095479	ENST00000358220	+	1825
chr3	129158826	129161483	chr3	129158968	129158969	ENST00000347300	+	2000	chr3	129322372	129326245	chr3	129325660	129325661	ENST00000393239	-	1750
chr2	8977222	8979209	chr2	8977759	8977760	ENST00000473731	-	2200	chr2	9141868	9143953	chr2	9143941	9143942	ENST00000305997	-	1975
chr4	78739575	78742806	chr4	78740768	78740769	ENST00000512485	-	2050	chr4	78977392	78979889	chr4	78978724	78978725	ENST00000264895	+	1825
chr12	72056098	72058338	chr12	72057748	72057749	ENST00000378743	-	2175	chr16	472972	475745	chr16	475619	475620	ENST00000262305	+	1800
chr12	72056098	72058338	chr12	72057748	72057749	ENST00000378743	-	2175	chr16	472972	475745	chr16	475619	475620	ENST00000262305	+	1800
chr10	5853532	5857435	chr10	5855511	5855512	ENST00000380191	-	1950	chr10	5928623	5934190	chr10	5931535	5931536	ENST00000397269	+	1575
chr5	132295041	132299734	chr5	132299325	132299326	ENST00000265343	-	2075	chr5	132385443	132389944	chr5	132387654	132387655	ENST00000304858	+	2050
chr2	128145128	128146772	chr2	128146040	128146041	ENST00000409947	-	1900	chr2	128281228	128284838	chr2	128284043	128284044	ENST00000295321	-	1425
chr8	48871383	48875366	chr8	48872742	48872743	ENST00000338368	-	1775	chr8	48919489	48922712	chr8	48920960	48920961	ENST00000523111	+	1050
chr11	47787149	47790720	chr11	47788852	47788853	ENST00000263773	-	975	chr11	47868235	47871590	chr11	47870018	47870019	ENST00000378460	-	1450
chr20	49409586	49413676	chr20	49411431	49411432	ENST00000358791	+	1925	chr20	49545358	49549175	chr20	49547957	49547958	ENST00000396032	-	1800
chr17	57181561	57185974	chr17	57184281	57184282	ENST00000393066	-	1450	chr17	57968409	57971978	chr17	57970447	57970448	ENST00000472940	+	2250
chr17	57182828	57185164	chr17	57184281	57184282	ENST00000393066	-	1450	chr17	57697020	57699270	chr17	57697219	57697220	ENST00000393043	+	1650
chr10	75631883	75635939	chr10	75634342	75634343	ENST00000394762	-	1825	chr10	75756570	75761005	chr10	75757872	75757873	ENST00000372755	+	1675
chr9	133318978	133321431	chr9	133320094	133320095	ENST00000334909	+	1325	chr9	133453031	133456202	chr9	133454993	133454994	ENST00000319725	+	1925
chr2	75872400	75874576	chr2	75873920	75873921	ENST00000358788	+	1825	chr2	75936456	75939020	chr2	75938114	75938115	ENST00000321027	-	1175
chr13	20354159	20357742	chr13	20357081	20357082	ENST00000492741	-	2175	chr13	20531091	20534923	chr13	20532810	20532811	ENST00000456228	+	1875
chr13	20355082	20359803	chr13	20357081	20357082	ENST00000492741	-	2175	chr13	20436313	20439484	chr13	20437775	20437776	ENST00000337963	-	1825
chr14	77563716	77565986	chr14	77564654	77564655	ENST00000557752	+	1925	chr14	77785813	77787789	chr14	77787226	77787227	ENST00000261534	-	1675
chr14	103058758	103060517	chr14	103058998	103058999	ENST00000262241	+	1700	chr14	103522658	103524520	chr14	103523798	103523799	ENST00000361246	-	1900
chr13	26795064	26798080	chr13	26796397	26796398	ENST00000468480	-	1250	chr13	26827083	26831567	chr13	26828276	26828277	ENST00000381527	+	1900
chr18	157295	159730	chr18	158383	158384	ENST00000582707	+	1450	chr18	266988	268701	chr18	268026	268027	ENST00000261600	-	1375
chr8	67624145	67628067	chr8	67624653	67624654	ENST00000521198	+	1600	chr8	67684003	67690579	chr8	67687449	67687450	ENST00000521960	+	1975
chr3	135968107	135969967	chr3	135969148	135969149	ENST00000251654	+	1400	chr3	136470513	136472370	chr3	136471219	136471220	ENST00000483235	-	1625
chr2	183580425	183582799	chr2	183580999	183581000	ENST00000264065	+	1325	chr2	183903051	183904778	chr2	183903585	183903586	ENST00000360982	-	2125
chr2	191512065	191514238	chr2	191513796	191513797	ENST00000409581	+	1475	chr7	104652801	104655613	chr7	104654626	104654627	ENST00000311117	+	2050
chr2	191512065	191514238	chr2	191513796	191513797	ENST00000409581	+	1475	chr7	104652801	104655613	chr7	104654626	104654627	ENST00000311117	+	2050
chr2	183901739	183903655	chr2	183903585	183903586	ENST00000360982	-	2125	chr2	187454012	187455892	chr2	187454792	187454793	ENST00000261023	+	2100
chr17	2413683	2416834	chr17	2415184	2415185	ENST00000571669	-	1600	chr17	2495264	2499066	chr17	2496504	2496505	ENST00000576586	+	1900
chr9	33816907	33818452	chr9	33817565	33817566	ENST00000263228	+	1275	chr9	34047880	34050633	chr9	34048946	34048947	ENST00000412543	-	1700
chr4	146018578	146020541	chr4	146019692	146019693	ENST00000514390	-	1700	chr4	146099902	146102471	chr4	146101312	146101313	ENST00000447906	-	1600
chr1	78147147	78150004	chr1	78149103	78149104	ENST00000370798	-	1225	chr1	78244021	78245784	chr1	78245309	78245310	ENST00000370791	+	1325
chr10	115932616	115937202	chr10	115933978	115933979	ENST00000369287	-	1675	chr10	115937322	115941471	chr10	115939029	115939030	ENST00000422662	+	1375
chr5	43062052	43069089	chr5	43067520	43067521	ENST00000503152	-	750	chr5	43119705	43123366	chr5	43120985	43120986	ENST00000515326	+	1850
chr9	34046771	34049276	chr9	34048946	34048947	ENST00000412543	-	1700	chr9	34125279	34128197	chr9	34126770	34126771	ENST00000361264	-	1275
chr14	75176873	75181219	chr14	75179817	75179818	ENST00000356357	-	1775	chr14	75229890	75232901	chr14	75230069	75230070	ENST00000552421	+	2175
chr3	147110746	147112532	chr3	147111209	147111210	ENST00000472523	+	2250	chr3	154040716	154043191	chr3	154042285	154042286	ENST00000544526	-	1975
chr5	107717243	107719303	chr5	107717798	107717799	ENST00000542267	-	2150	chr5	108745580	108747696	chr5	108745694	108745695	ENST00000361189	-	2300
chr8	25041182	25042718	chr8	25042238	25042239	ENST00000410074	+	1600	chr8	25316327	25317982	chr8	25316513	25316514	ENST00000330560	+	1675
chr14	91882322	91884692	chr14	91884120	91884121	ENST00000389857	-	1125	chr14	91975045	91978189	chr14	91976823	91976824	ENST00000554390	-	1575
chr17	60141749	60144598	chr17	60142642	60142643	ENST00000397786	-	1425	chr8	97272082	97274829	chr8	97273943	97273944	ENST00000517309	+	1700
chr17	60141749	60144598	chr17	60142642	60142643	ENST00000397786	-	1425	chr8	97272082	97274829	chr8	97273943	97273944	ENST00000517309	+	1700
chr4	83818497	83825209	chr4	83821690	83821691	ENST00000355196	-	2600	chr4	83929839	83936621	chr4	83934078	83934079	ENST00000505397	-	1900
chr4	83932596	83936996	chr4	83934078	83934079	ENST00000505397	-	1900	chr4	83954743	83957786	chr4	83955600	83955601	ENST00000509093	+	1925
chr6	135817915	135820338	chr6	135818913	135818914	ENST00000265602	-	1350	chr6	136870268	136872957	chr6	136871645	136871646	ENST00000354570	-	1825
chr14	91975507	91978022	chr14	91976823	91976824	ENST00000554390	-	1575	chr14	92301828	92304459	chr14	92302869	92302870	ENST00000556018	-	2100
chr17	75083472	75087528	chr17	75084831	75084832	ENST00000392476	+	1250	chr17	75135529	75139019	chr17	75137005	75137006	ENST00000430767	+	2025
chr2	32234641	32236375	chr2	32236104	32236105	ENST00000490459	-	2175	chr2	32389314	32391737	chr2	32390933	32390934	ENST00000379343	+	1050
chr4	148602322	148606656	chr4	148605380	148605381	ENST00000322396	-	1775	chr4	148649854	148654389	chr4	148653214	148653215	ENST00000336498	+	1625
chr2	69869302	69871179	chr2	69870848	69870849	ENST00000406297	-	1975	chr2	69968179	69969701	chr2	69969106	69969107	ENST00000394295	+	1525
chr7	95950730	95952456	chr7	95951458	95951459	ENST00000416240	-	1800	chr7	96336475	96339275	chr7	96339172	96339173	ENST00000417009	-	2200
chr2	32581210	32582813	chr2	32582096	32582097	ENST00000421745	+	2025	chr9	95430213	95432682	chr9	95432546	95432547	ENST00000287996	-	1775
chr15	91072839	91074917	chr15	91073157	91073158	ENST00000420329	+	1975	chr8	99128254	99130724	chr8	99129540	99129541	ENST00000401707	+	1775
chr15	91072839	91074917	chr15	91073157	91073158	ENST00000420329	+	1975	chr8	99128254	99130724	chr8	99129540	99129541	ENST00000401707	+	1775
chr13	50016508	50019619	chr13	50018429	50018430	ENST00000354234	+	1050	chr13	50158297	50162493	chr13	50159718	50159719	ENST00000378302	-	1925
chr2	160470367	160474299	chr2	160473202	160473203	ENST00000392783	-	1675	chr2	160564883	160572066	chr2	160569000	160569001	ENST00000409175	+	1850
chrX	16737154	16739737	chrX	16737755	16737756	ENST00000380155	+	1850	chrX	16804474	16806195	chrX	16804550	16804551	ENST00000380122	+	1225
chr3	14988832	14991175	chr3	14989091	14989092	ENST00000413118	+	1575	chr3	15642644	15644571	chr3	15643337	15643338	ENST00000321169	-	750
chr2	32581210	32582813	chr2	32582096	32582097	ENST00000421745	+	2025	chr9	95430213	95432682	chr9	95432546	95432547	ENST00000287996	-	1775
chr7	148822477	148824067	chr7	148823508	148823509	ENST00000426851	+	3950	chr7	150018763	150021367	chr7	150020757	150020758	ENST00000539352	-	1050
chr7	104653054	104655993	chr7	104654626	104654627	ENST00000311117	+	2050	chr7	105161169	105164095	chr7	105162713	105162714	ENST00000481939	-	2725
chr20	35722650	35725606	chr20	35724397	35724398	ENST00000373664	-	1850	chr20	35806347	35808998	chr20	35807449	35807450	ENST00000237530	+	1500
chr13	21097589	21102827	chr13	21099995	21099996	ENST00000382812	-	1775	chr13	21139646	21144350	chr13	21140585	21140586	ENST00000382778	+	975
chr13	21098623	21100356	chr13	21099995	21099996	ENST00000382812	-	1775	chr13	21475589	21478455	chr13	21477186	21477187	ENST00000490513	-	1600
chr3	141205080	141206779	chr3	141205889	141205890	ENST00000515549	+	1950	chr6	76458156	76460847	chr6	76458909	76458910	ENST00000369981	+	2025
chr3	141205080	141206779	chr3	141205889	141205890	ENST00000515549	+	1950	chr6	76458156	76460847	chr6	76458909	76458910	ENST00000369981	+	2025
chr5	68529975	68532202	chr5	68530700	68530701	ENST00000256443	+	1350	chr5	68627120	68629377	chr5	68628635	68628636	ENST00000383374	-	2025
chr9	90998782	91009616	chr9	91003334	91003335	ENST00000375859	+	1900	chr9	91140526	91154465	chr9	91150020	91150021	ENST00000487646	+	1875
chr5	68626792	68633026	chr5	68628635	68628636	ENST00000383374	-	2025	chr5	68660168	68667090	chr5	68665124	68665125	ENST00000361732	+	1400
chr16	88922774	88924734	chr16	88923373	88923374	ENST00000268695	-	2200	chr16	89159515	89161800	chr16	89160217	89160218	ENST00000317447	+	1200
chr16	71841846	71843774	chr16	71843103	71843104	ENST00000299980	-	2125	chr16	71878337	71881293	chr16	71879899	71879900	ENST00000568581	+	1425
chr14	67705865	67709673	chr14	67707826	67707827	ENST00000261681	+	1750	chr14	67825015	67827419	chr14	67826507	67826508	ENST00000554087	-	1750
chr8	101321425	101323568	chr8	101322554	101322555	ENST00000341084	-	1925	chr8	101569926	101571975	chr8	101571969	101571970	ENST00000520552	-	1450
chr6	151772845	151775015	chr6	151773258	151773259	ENST00000367303	-	1575	chr6	151812884	151816679	chr6	151815165	151815166	ENST00000239374	+	1925
chr5	172409327	172413195	chr5	172410760	172410761	ENST00000519374	+	2125	chr5	172482443	172485251	chr5	172483355	172483356	ENST00000296953	+	1950
chr3	25701406	25711185	chr3	25706397	25706398	ENST00000424225	-	1775	chr3	25820184	25833393	chr3	25831529	25831530	ENST00000417874	-	1825
chr21	47877844	47879584	chr21	47878812	47878813	ENST00000400274	+	1650	chr6	47445419	47446944	chr6	47445525	47445526	ENST00000359314	+	1925
chr21	47877844	47879584	chr21	47878812	47878813	ENST00000400274	+	1650	chr6	47445419	47446944	chr6	47445525	47445526	ENST00000359314	+	1925
chr17	57970172	57971882	chr17	57970447	57970448	ENST00000472940	+	2250	chr18	9614484	9616129	chr18	9614566	9614567	ENST00000400555	-	1975
chr17	57970172	57971882	chr17	57970447	57970448	ENST00000472940	+	2250	chr18	9614484	9616129	chr18	9614566	9614567	ENST00000400555	-	1975
chr16	89005265	89009412	chr16	89008251	89008252	ENST00000569443	-	2225	chr16	89158252	89162760	chr16	89160217	89160218	ENST00000317447	+	1200
chr20	13618822	13620677	chr20	13619586	13619587	ENST00000337743	-	1675	chr20	13764351	13767218	chr20	13765531	13765532	ENST00000202816	-	1400
chr9	95086363	95089965	chr9	95087766	95087767	ENST00000375587	+	1625	chr9	95430183	95433166	chr9	95432546	95432547	ENST00000287996	-	1775
chr3	132377648	132379978	chr3	132379566	132379567	ENST00000264990	-	2450	chr3	132438837	132441389	chr3	132441302	132441303	ENST00000471702	-	1275
chr21	37526803	37530706	chr21	37529080	37529081	ENST00000270190	+	1725	chr21	37691661	37694451	chr21	37692487	37692488	ENST00000400485	+	1975
chr3	88104745	88109799	chr3	88108424	88108425	ENST00000473136	+	2175	chr3	88197543	88201780	chr3	88199034	88199035	ENST00000462901	-	1900
chr5	176431118	176438754	chr5	176433751	176433752	ENST00000511320	-	2125	chr5	176447045	176450867	chr5	176449697	176449698	ENST00000358149	+	1575
chr5	176431804	176434853	chr5	176433751	176433752	ENST00000511320	-	2125	chr5	176558939	176562927	chr5	176560080	176560081	ENST00000354179	+	1825
chr6	119669555	119672250	chr6	119670925	119670926	ENST00000368468	-	925	chr9	133998872	134001645	chr9	134000948	134000949	ENST00000359428	+	1625
chr6	119669555	119672250	chr6	119670925	119670926	ENST00000368468	-	925	chr9	133998872	134001645	chr9	134000948	134000949	ENST00000359428	+	1625
chr12	69003924	69007308	chr12	69004619	69004620	ENST00000250559	+	1975	chr12	69078959	69083860	chr12	69080514	69080515	ENST00000229179	+	1075
chr2	200322790	200325242	chr2	200323467	200323468	ENST00000443023	-	1375	chr2	200774750	200777548	chr2	200776029	200776030	ENST00000491721	+	1950
chr6	17392309	17395051	chr6	17393447	17393448	ENST00000229922	+	2000	chr6	17706157	17707934	chr6	17706655	17706656	ENST00000537253	-	1675
chr15	22832402	22836117	chr15	22833395	22833396	ENST00000283645	+	1375	chr15	22891621	22895123	chr15	22892663	22892664	ENST00000313077	+	1675
chr3	124774635	124778126	chr3	124774801	124774802	ENST00000311127	-	1850	chr3	125093768	125095732	chr3	125094197	125094198	ENST00000360647	-	2425
chr3	192635825	192637611	chr3	192635949	192635950	ENST00000392452	-	1600	chr3	193309884	193312231	chr3	193310933	193310934	ENST00000361150	+	1325
chr19	32829114	32838937	chr19	32836514	32836515	ENST00000355898	+	1375	chr19	32893920	32898681	chr19	32896655	32896656	ENST00000392250	+	1125
chr1	220218535	220220494	chr1	220219999	220220000	ENST00000366923	-	2775	chr1	220265581	220269628	chr1	220267444	220267445	ENST00000366922	+	1750
chr11	17229045	17230754	chr11	17229529	17229530	ENST00000540361	-	1725	chr11	17298034	17300385	chr11	17298288	17298289	ENST00000323688	+	1400
chr2	131849224	131852642	chr2	131851032	131851033	ENST00000389915	-	1950	chr2	131860383	131865109	chr2	131862420	131862421	ENST00000409158	+	1875
chr7	98474791	98477414	chr7	98476113	98476114	ENST00000355540	+	1800	chr7	98923231	98924947	chr7	98923521	98923522	ENST00000432884	+	1625
chr1	89457125	89459781	chr1	89458603	89458604	ENST00000260508	-	1475	chr1	89989371	89991621	chr1	89990395	89990396	ENST00000449440	+	1800
chr14	76043638	76046598	chr14	76044960	76044961	ENST00000238667	+	1700	chr14	76124748	76127728	chr14	76127335	76127336	ENST00000557003	+	1900
chr10	74384696	74386457	chr10	74385898	74385899	ENST00000398761	-	1875	chr10	74450489	74453373	chr10	74451889	74451890	ENST00000373053	+	1275
chr3	125236325	125240193	chr3	125239040	125239041	ENST00000251775	-	1600	chr3	125311507	125315813	chr3	125313933	125313934	ENST00000296220	-	1650
chr14	76126966	76129824	chr14	76127335	76127336	ENST00000557003	+	1900	chr14	76449932	76452459	chr14	76452096	76452097	ENST00000314067	+	1425
chr1	230776821	230779621	chr1	230778235	230778236	ENST00000494371	+	1150	chr1	231113098	231115537	chr1	231114620	231114621	ENST00000481976	-	1175
chr9	74383169	74385131	chr9	74383799	74383800	ENST00000377044	-	2150	chr9	74524847	74527628	chr9	74525846	74525847	ENST00000377041	-	2075
chr13	37572134	37576910	chr13	37573503	37573504	ENST00000239891	-	1575	chr13	37632372	37635841	chr13	37633849	37633850	ENST00000360252	-	2050
chr15	51057662	51059502	chr15	51058004	51058005	ENST00000261854	-	1950	chr5	36875365	36877060	chr5	36876861	36876862	ENST00000282516	+	2175
chr15	51057662	51059502	chr15	51058004	51058005	ENST00000261854	-	1950	chr5	36875365	36877060	chr5	36876861	36876862	ENST00000282516	+	2175
chr1	36347513	36350124	chr1	36348810	36348811	ENST00000373204	+	1600	chr1	36395386	36397961	chr1	36396319	36396320	ENST00000324350	+	1650
chr3	121466624	121468797	chr3	121468601	121468602	ENST00000340645	-	2100	chr3	121553319	121555550	chr3	121553925	121553926	ENST00000393650	-	1775
chr1	149977821	149984701	chr1	149982624	149982625	ENST00000369135	-	1750	chr1	150037094	150041280	chr1	150039369	150039370	ENST00000369130	+	1125
chr7	39661063	39664836	chr7	39663082	39663083	ENST00000005257	+	1600	chr7	39769831	39775766	chr7	39773231	39773232	ENST00000340510	+	1900
chr16	53088512	53090176	chr16	53088945	53088946	ENST00000447540	+	1525	chr16	53466794	53469196	chr16	53468332	53468333	ENST00000262133	+	2050
chr11	46612682	46616459	chr11	46615674	46615675	ENST00000526606	-	1950	chr11	46637148	46640033	chr11	46638826	46638827	ENST00000312040	+	1875
chr17	8339179	8340721	chr17	8339179	8339180	ENST00000299734	+	1800	chr17	8533099	8535391	chr17	8534078	8534079	ENST00000360416	-	1425
chr14	64853000	64857077	chr14	64854749	64854750	ENST00000545908	+	1150	chr14	64970157	64972159	chr14	64971930	64971931	ENST00000555220	-	2050
chr8	98655786	98657770	chr8	98656407	98656408	ENST00000336273	+	1925	chr8	99127996	99130586	chr8	99129540	99129541	ENST00000401707	+	1775
chr8	98656206	98659188	chr8	98656407	98656408	ENST00000336273	+	1925	chr8	98786965	98790683	chr8	98787285	98787286	ENST00000445593	+	2050
chr12	125000489	125006101	chr12	125002839	125002840	ENST00000420698	-	1500	chr12	125047930	125053857	chr12	125052134	125052135	ENST00000542565	-	1925
chr2	208392305	208399415	chr2	208394461	208394462	ENST00000430624	+	1375	chr2	208487417	208492692	chr2	208490651	208490652	ENST00000461419	-	1625
chr1	108229330	108231475	chr1	108231149	108231150	ENST00000479977	-	1950	chr1	114352461	114355425	chr1	114355097	114355098	ENST00000261441	-	2050
chr15	41407358	41408983	chr15	41408551	41408552	ENST00000361937	-	1825	chr15	41521863	41524451	chr15	41523037	41523038	ENST00000558351	+	1475
chr15	41407574	41409310	chr15	41408551	41408552	ENST00000361937	-	1825	chr15	41622908	41625714	chr15	41624892	41624893	ENST00000260359	+	2000
chr2	65356015	65359072	chr2	65357239	65357240	ENST00000409784	-	1775	chr2	65453241	65456222	chr2	65454887	65454888	ENST00000260641	+	2225
chr1	151429106	151432636	chr1	151431940	151431941	ENST00000271715	-	1900	chr1	151510898	151514410	chr1	151512781	151512782	ENST00000392712	+	1950
chr8	95485646	95487396	chr8	95487336	95487337	ENST00000336148	-	1525	chr8	95731182	95733187	chr8	95732128	95732129	ENST00000414645	+	1200
chr13	52015950	52029988	chr13	52027342	52027343	ENST00000398119	-	850	chr13	52150583	52166755	chr13	52158644	52158645	ENST00000298125	+	1875
chr8	95563755	95566398	chr8	95565756	95565757	ENST00000421249	-	1775	chr8	95651251	95655119	chr8	95653302	95653303	ENST00000423620	+	1425
chr8	95564312	95566828	chr8	95565756	95565757	ENST00000421249	-	1775	chr8	95731001	95732970	chr8	95732128	95732129	ENST00000414645	+	1200
chr9	77641881	77645647	chr9	77643309	77643310	ENST00000376834	-	1775	chr9	77702117	77704528	chr9	77703459	77703460	ENST00000346234	+	1450
chr3	183352824	183356647	chr3	183353356	183353357	ENST00000242810	+	1875	chr3	183414297	183416088	chr3	183415606	183415607	ENST00000421660	+	1400
chr12	100659316	100662294	chr12	100660918	100660919	ENST00000549687	+	2025	chr12	100967356	100969464	chr12	100967461	100967462	ENST00000266754	+	2175
chr16	87983209	87985331	chr16	87985038	87985039	ENST00000289484	+	950	chr16	88635928	88638208	chr16	88636789	88636790	ENST00000301011	+	1325
chr17	57182840	57186540	chr17	57184281	57184282	ENST00000393066	-	1450	chr7	104651703	104654637	chr7	104654626	104654627	ENST00000311117	+	2050
chr17	57182840	57186540	chr17	57184281	57184282	ENST00000393066	-	1450	chr7	104651703	104654637	chr7	104654626	104654627	ENST00000311117	+	2050
chr7	141400140	141403268	chr7	141401952	141401953	ENST00000536163	-	1800	chr7	141437933	141443382	chr7	141438200	141438201	ENST00000465582	+	1350
chr17	58602101	58603865	chr17	58603579	58603580	ENST00000083182	-	1875	chr19	39833012	39834515	chr19	39833108	39833109	ENST00000314471	+	1825
chr17	58602101	58603865	chr17	58603579	58603580	ENST00000083182	-	1875	chr19	39833012	39834515	chr19	39833108	39833109	ENST00000314471	+	1825
chr10	70285572	70287435	chr10	70287230	70287231	ENST00000265870	-	1075	chr10	70480969	70483778	chr10	70480971	70480972	ENST00000535016	+	1475
chr8	95650894	95656484	chr8	95653302	95653303	ENST00000423620	+	1425	chr8	95728446	95733482	chr8	95732128	95732129	ENST00000414645	+	1200
chr8	95652142	95654466	chr8	95653302	95653303	ENST00000423620	+	1425	chr8	95834020	95837000	chr8	95835527	95835528	ENST00000523731	+	1350
chr8	30513931	30516548	chr8	30515767	30515768	ENST00000355904	-	1975	chr8	30583899	30586481	chr8	30585442	30585443	ENST00000221130	-	2000
chr4	106066539	106069010	chr4	106067032	106067033	ENST00000305737	+	2050	chr4	106392150	106395317	chr4	106395237	106395238	ENST00000341695	-	1075
chr1	151510726	151515686	chr1	151512781	151512782	ENST00000392712	+	1950	chr1	151583230	151586215	chr1	151584541	151584542	ENST00000368841	+	2075
chr3	32021378	32023674	chr3	32022796	32022797	ENST00000452791	-	1450	chr3	32146762	32148427	chr3	32148003	32148004	ENST00000282541	+	1700
chr6	108278227	108280677	chr6	108279392	108279393	ENST00000369002	-	2075	chr6	108581358	108583775	chr6	108582463	108582464	ENST00000230085	-	1925
chr1	62207014	62208687	chr1	62208149	62208150	ENST00000371158	+	1700	chr8	103424188	103425708	chr8	103425068	103425069	ENST00000520539	-	1850
chr1	62207014	62208687	chr1	62208149	62208150	ENST00000371158	+	1700	chr8	103424188	103425708	chr8	103425068	103425069	ENST00000520539	-	1850
chr14	36277124	36280114	chr14	36278509	36278510	ENST00000307138	-	2100	chr14	36294674	36297359	chr14	36295524	36295525	ENST00000216807	+	1125
chr8	130950508	130954142	chr8	130952117	130952118	ENST00000519540	-	2050	chr8	131027064	131029855	chr8	131029374	131029375	ENST00000523993	-	2175
chr13	114144601	114146727	chr13	114145310	114145311	ENST00000434316	+	1325	chr13	114237161	114239279	chr13	114239013	114239014	ENST00000538138	+	725
chr5	14142419	14144574	chr5	14143811	14143812	ENST00000502816	+	1725	chr9	37118842	37121791	chr9	37120536	37120537	ENST00000336755	+	1300
chr10	5725704	5728346	chr10	5726801	5726802	ENST00000328090	+	1850	chr3	33480193	33482855	chr3	33482001	33482002	ENST00000283628	-	1700
chr10	5725704	5728346	chr10	5726801	5726802	ENST00000328090	+	1850	chr3	33480193	33482855	chr3	33482001	33482002	ENST00000283628	-	1700
chr17	58676884	58678484	chr17	58677554	58677555	ENST00000305921	+	1975	chr3	63848687	63850332	chr3	63850233	63850234	ENST00000474112	+	1475
chr14	69614281	69621283	chr14	69619842	69619843	ENST00000341516	-	2200	chr14	69656459	69660724	chr14	69658228	69658229	ENST00000409018	+	1900
chr5	14142419	14144574	chr5	14143811	14143812	ENST00000502816	+	1725	chr9	37118842	37121791	chr9	37120536	37120537	ENST00000336755	+	1300
chr1	117600781	117604965	chr1	117602925	117602926	ENST00000369466	+	1225	chr1	117907143	117912903	chr1	117910071	117910072	ENST00000356554	+	2175
chr12	48296929	48299891	chr12	48298822	48298823	ENST00000548664	-	1225	chr12	48498540	48500341	chr12	48500090	48500091	ENST00000549518	-	1800
chr12	65150244	65154683	chr12	65153226	65153227	ENST00000258145	-	2075	chr12	65172497	65176188	chr12	65174589	65174590	ENST00000229088	+	1775
chr17	58676884	58678484	chr17	58677554	58677555	ENST00000305921	+	1975	chr3	63848687	63850332	chr3	63850233	63850234	ENST00000474112	+	1475
chr2	26201251	26206242	chr2	26205617	26205618	ENST00000405914	-	1075	chr2	26255595	26260540	chr2	26256976	26256977	ENST00000495146	+	1975
chr21	47701944	47708797	chr21	47706210	47706211	ENST00000397708	-	1700	chr21	47740125	47746082	chr21	47744036	47744037	ENST00000359568	+	1625
chr1	108741993	108743776	chr1	108742979	108742980	ENST00000565488	-	2000	chr1	109101096	109104030	chr1	109102711	109102712	ENST00000405454	+	1625
chr21	47743254	47746166	chr21	47744036	47744037	ENST00000359568	+	1625	chr21	47876901	47880445	chr21	47878812	47878813	ENST00000400274	+	1650
chr4	39638651	39642946	chr4	39640709	39640710	ENST00000295958	-	1750	chr4	39697294	39700526	chr4	39699664	39699665	ENST00000261427	+	1850
chr4	39639057	39643147	chr4	39640709	39640710	ENST00000295958	-	1750	chr4	39976935	39979718	chr4	39979575	39979576	ENST00000503396	-	1775
chrX	70583622	70587181	chrX	70586114	70586115	ENST00000423759	+	1800	chrX	70751491	70755381	chrX	70752933	70752934	ENST00000373719	+	1725
chr13	25857741	25864264	chr13	25862146	25862147	ENST00000381801	-	1400	chr13	25873125	25877918	chr13	25875662	25875663	ENST00000381736	+	2300
chr14	21735788	21737662	chr14	21737652	21737653	ENST00000336053	-	1450	chr17	57969823	57971989	chr17	57970447	57970448	ENST00000472940	+	2250
chr14	21735788	21737662	chr14	21737652	21737653	ENST00000336053	-	1450	chr17	57969823	57971989	chr17	57970447	57970448	ENST00000472940	+	2250
chr9	96211528	96214948	chr9	96214173	96214174	ENST00000375389	+	1975	chr9	96337573	96343441	chr9	96338689	96338690	ENST00000359246	+	1775
chr1	109101653	109104829	chr1	109102711	109102712	ENST00000405454	+	1625	chr1	109288780	109290814	chr1	109289310	109289311	ENST00000370008	+	1700
chr19	2150227	2153007	chr19	2151555	2151556	ENST00000345016	-	1500	chr19	2162245	2165690	chr19	2164148	2164149	ENST00000398665	+	1350
chr5	32311400	32314472	chr5	32313114	32313115	ENST00000382142	-	1925	chr5	32443228	32445818	chr5	32444866	32444867	ENST00000265069	-	1900
chr1	227750211	227752851	chr1	227751236	227751237	ENST00000498759	+	1925	chr1	227914757	227917634	chr1	227916358	227916359	ENST00000366760	+	1875
chr3	113250521	113252326	chr3	113251143	113251144	ENST00000264852	+	1700	chr3	113465017	113467077	chr3	113465866	113465867	ENST00000273398	+	1350
chr11	63436138	63441406	chr11	63439380	63439381	ENST00000538786	-	2025	chr11	63446930	63451361	chr11	63448918	63448919	ENST00000341307	+	2075
chr1	115052362	115054951	chr1	115053780	115053781	ENST00000358465	-	2225	chr5	60627006	60628857	chr5	60628100	60628101	ENST00000252744	+	2050
chr1	115052362	115054951	chr1	115053780	115053781	ENST00000358465	-	2225	chr5	60627006	60628857	chr5	60628100	60628101	ENST00000252744	+	2050
chr19	34661776	34665774	chr19	34663352	34663353	ENST00000433627	+	1950	chr19	34917415	34920613	chr19	34919268	34919269	ENST00000246548	+	1825
chr11	77530218	77533723	chr11	77532062	77532063	ENST00000308488	-	1725	chr11	77703658	77708132	chr11	77705723	77705724	ENST00000534064	-	1200
chr1	115052558	115055339	chr1	115053780	115053781	ENST00000358465	-	2225	chr20	46129559	46131795	chr20	46130601	46130602	ENST00000341724	+	1800
chr1	115052558	115055339	chr1	115053780	115053781	ENST00000358465	-	2225	chr20	46129559	46131795	chr20	46130601	46130602	ENST00000341724	+	1800
chr17	2205144	2209443	chr17	2207064	2207065	ENST00000263073	-	1375	chr17	2236564	2242574	chr17	2240806	2240807	ENST00000268989	+	1150
chr3	45633319	45635979	chr3	45635816	45635817	ENST00000440097	+	900	chr3	45730654	45733498	chr3	45730678	45730679	ENST00000455997	+	1425
chr17	58464839	58471595	chr17	58469585	58469586	ENST00000300896	-	1075	chr17	58675765	58681386	chr17	58677554	58677555	ENST00000305921	+	1975
chr11	68078661	68081033	chr11	68080077	68080078	ENST00000294304	+	1725	chr11	68227776	68230081	chr11	68228186	68228187	ENST00000393799	+	1400
chr17	58467392	58470165	chr17	58469585	58469586	ENST00000300896	-	1075	chr17	58602354	58604417	chr17	58603579	58603580	ENST00000083182	-	1875
chr1	236766566	236769066	chr1	236767803	236767804	ENST00000366581	-	1875	chr1	236958184	236961261	chr1	236958610	236958611	ENST00000366577	+	1900
chr22	30232954	30235817	chr22	30234264	30234265	ENST00000397771	-	1400	chr22	30277750	30279574	chr22	30279144	30279145	ENST00000401950	+	2100
chr7	129844549	129846193	chr7	129845337	129845338	ENST00000397622	-	1300	chr7	130353056	130354624	chr7	130353597	130353598	ENST00000445977	-	1275

## Sheet: MCF7 repl 2
ChIA-PET seg1 chr	ChIA-PET seg1 start	ChIA-PET seg1 end	Gene 1 chr	Gene 1 start	Gene 1 end	Gene 1 Transcript ID	Gene 1 Strand	Gene 1 Elongation Rate	ChIA-PET seg2 chr	ChIA-PET seg2 start	ChIA-PET seg2 end	Gene 2 chr	Gene 2 start	Gene 2 end	Gene 2 Transcript ID	Gene 2 Strand	Gene 2 Elongation Rate
chr21	38442856	38445817	chr21	38445526	38445527	ENST00000492275	+	1775	chr21	38739056	38741173	chr21	38739236	38739237	ENST00000462274	+	2050
chr15	56282050	56287467	chr15	56285943	56285944	ENST00000435532	-	1625	chr15	56534024	56538662	chr15	56535482	56535483	ENST00000423270	-	1875
chr10	43132257	43135644	chr10	43134000	43134001	ENST00000486187	-	1125	chr10	43275563	43280155	chr10	43278249	43278250	ENST00000374518	+	1775
chr3	183351936	183356577	chr3	183353356	183353357	ENST00000242810	+	1875	chr3	183414087	183416953	chr3	183415606	183415607	ENST00000421660	+	1400
chr2	9143543	9145486	chr2	9143941	9143942	ENST00000305997	-	1975	chr7	135193612	135195882	chr7	135194874	135194875	ENST00000541284	-	1875
chr2	9143543	9145486	chr2	9143941	9143942	ENST00000305997	-	1975	chr7	135193612	135195882	chr7	135194874	135194875	ENST00000541284	-	1875
chr22	19109069	19110931	chr22	19109966	19109967	ENST00000537045	-	1625	chr22	19418315	19420877	chr22	19419255	19419256	ENST00000263208	-	1300
chr1	233463509	233465062	chr1	233463514	233463515	ENST00000366623	+	1625	chr1	233749734	233752162	chr1	233749750	233749751	ENST00000366621	+	1875
chr5	132296721	132300975	chr5	132299325	132299326	ENST00000265343	-	2075	chr5	132385273	132389363	chr5	132387654	132387655	ENST00000304858	+	2050
chr20	33411138	33413574	chr20	33413451	33413452	ENST00000359003	-	1975	chr20	46130574	46132670	chr20	46130601	46130602	ENST00000341724	+	1800
chr4	186123242	186127255	chr4	186125154	186125155	ENST00000458385	-	1725	chr4	186127354	186133804	chr4	186131233	186131234	ENST00000264694	+	1975
chr13	37573411	37578166	chr13	37573503	37573504	ENST00000239891	-	1575	chr13	37631570	37635674	chr13	37633849	37633850	ENST00000360252	-	2050
chr9	33165600	33168322	chr9	33167353	33167354	ENST00000535206	-	2150	chr9	33288911	33291157	chr9	33290509	33290510	ENST00000379540	+	950
chr5	43064995	43071284	chr5	43067520	43067521	ENST00000503152	-	750	chr5	43119667	43123996	chr5	43120985	43120986	ENST00000515326	+	1850
chr11	46612073	46617371	chr11	46615674	46615675	ENST00000526606	-	1950	chr11	46634890	46640526	chr11	46638826	46638827	ENST00000312040	+	1875
chr14	64008001	64011840	chr14	64010091	64010092	ENST00000337537	-	1950	chr14	64106623	64112419	chr14	64108578	64108579	ENST00000394942	-	1475
chr17	62205431	62208883	chr17	62207501	62207502	ENST00000584041	-	2000	chr17	62338769	62342171	chr17	62340660	62340661	ENST00000584379	-	1600
chr14	36276986	36280176	chr14	36278509	36278510	ENST00000307138	-	2100	chr14	36292288	36296836	chr14	36295524	36295525	ENST00000216807	+	1125
chr2	131847112	131855773	chr2	131851032	131851033	ENST00000389915	-	1950	chr2	131857899	131867611	chr2	131862420	131862421	ENST00000409158	+	1875
chr17	64296465	64299194	chr17	64298754	64298755	ENST00000578063	+	925	chr17	64960065	64962110	chr17	64961026	64961027	ENST00000262138	+	1875
chr22	19418044	19422236	chr22	19419255	19419256	ENST00000263208	-	1300	chr22	19463646	19468672	chr22	19466982	19466983	ENST00000407835	+	950
chr9	36189377	36191599	chr9	36190928	36190929	ENST00000464497	+	2150	chr9	36400242	36401770	chr9	36401194	36401195	ENST00000377885	-	1525
chr17	35714676	35717982	chr17	35716058	35716059	ENST00000394403	-	1450	chr17	35766195	35768951	chr17	35766965	35766966	ENST00000394395	+	1175
chr6	137112163	137114645	chr6	137113655	137113656	ENST00000359015	-	1825	chr6	137141887	137145348	chr6	137143718	137143719	ENST00000541292	+	1625
chr5	59994210	59996553	chr5	59996016	59996017	ENST00000512452	-	1575	chr5	60627404	60629725	chr5	60628100	60628101	ENST00000252744	+	2050
chr5	59995886	59998322	chr5	59996016	59996017	ENST00000512452	-	1575	chr5	60239584	60242446	chr5	60240899	60240900	ENST00000439176	-	800
chr16	11889469	11891900	chr16	11891122	11891123	ENST00000355758	-	1825	chr16	12008639	12011975	chr16	12009938	12009939	ENST00000420576	-	1975
chr1	169763753	169765531	chr1	169764190	169764191	ENST00000359326	+	1575	chr1	169862183	169864517	chr1	169863092	169863093	ENST00000367771	-	1125
chr9	114244514	114247783	chr9	114247024	114247025	ENST00000259335	-	2325	chr9	114359002	114364925	chr9	114362134	114362135	ENST00000538962	-	825
chr1	115051544	115058715	chr1	115053780	115053781	ENST00000358465	-	2225	chr1	115295863	115302714	chr1	115300647	115300648	ENST00000530886	-	1850
chr9	96211672	96218862	chr9	96214173	96214174	ENST00000375389	+	1975	chr9	96335264	96341672	chr9	96338689	96338690	ENST00000359246	+	1775
chr11	46867608	46869466	chr11	46867842	46867843	ENST00000312055	-	1525	chr11	47290892	47293495	chr11	47290927	47290928	ENST00000342922	+	1350
chr17	73399904	73402430	chr17	73401789	73401790	ENST00000316615	-	2025	chr20	50383056	50385678	chr20	50385172	50385173	ENST00000338821	-	2350
chr3	160166147	160168803	chr3	160167616	160167617	ENST00000483754	-	1900	chr3	160282163	160283900	chr3	160283375	160283376	ENST00000334256	-	1875
chr15	50976295	50981465	chr15	50979011	50979012	ENST00000313478	-	2000	chr15	51052766	51059546	chr15	51058004	51058005	ENST00000261854	-	1950
chr15	50977828	50980537	chr15	50979011	50979012	ENST00000313478	-	2000	chr15	51197788	51202411	chr15	51200869	51200870	ENST00000561441	+	1750
chr8	103873594	103879966	chr8	103876646	103876647	ENST00000520750	+	1850	chr8	104029090	104036191	chr8	104033291	104033292	ENST00000395862	+	1650
chr17	73399904	73402430	chr17	73401789	73401790	ENST00000316615	-	2025	chr20	50383056	50385678	chr20	50385172	50385173	ENST00000338821	-	2350
chr12	109124456	109126717	chr12	109125371	109125372	ENST00000261401	-	1900	chr12	109249785	109252867	chr12	109251365	109251366	ENST00000551165	-	1525
chr10	115933121	115936570	chr10	115933978	115933979	ENST00000369287	-	1675	chr10	115937140	115940548	chr10	115939029	115939030	ENST00000422662	+	1375
chr12	45609128	45611204	chr12	45609770	45609771	ENST00000426898	+	1975	chr12	46122660	46124378	chr12	46123448	46123449	ENST00000334344	+	2175
chr2	175113268	175115084	chr2	175113425	175113426	ENST00000284719	-	2150	chr2	175258511	175261711	chr2	175260442	175260443	ENST00000342016	-	1875
chr1	246668302	246670787	chr1	246670613	246670614	ENST00000403792	-	1050	chr1	246727323	246729930	chr1	246729746	246729747	ENST00000483271	+	1900
chr5	115420205	115422091	chr5	115420688	115420689	ENST00000274458	+	1775	chr5	138940296	138941951	chr5	138940751	138940752	ENST00000253815	+	1775
chr6	151772870	151775128	chr6	151773258	151773259	ENST00000367303	-	1575	chr6	151814705	151816568	chr6	151815165	151815166	ENST00000239374	+	1925
chr2	208393404	208397762	chr2	208394461	208394462	ENST00000430624	+	1375	chr2	208490294	208494970	chr2	208490651	208490652	ENST00000461419	-	1625
chr2	32234491	32236283	chr2	32236104	32236105	ENST00000490459	-	2175	chr2	32581671	32583851	chr2	32582096	32582097	ENST00000421745	+	2025
chr2	32235154	32237462	chr2	32236104	32236105	ENST00000490459	-	2175	chr2	32390889	32392468	chr2	32390933	32390934	ENST00000379343	+	1050
chr1	117908682	117911522	chr1	117910071	117910072	ENST00000356554	+	2175	chr2	9695732	9697928	chr2	9695916	9695917	ENST00000310823	-	2075
chr1	117908682	117911522	chr1	117910071	117910072	ENST00000356554	+	2175	chr2	9695732	9697928	chr2	9695916	9695917	ENST00000310823	-	2075
chrX	70585948	70588143	chrX	70586114	70586115	ENST00000423759	+	1800	chrX	70752570	70755471	chrX	70752933	70752934	ENST00000373719	+	1725
chr2	26202170	26209125	chr2	26205617	26205618	ENST00000405914	-	1075	chr2	26252980	26258488	chr2	26256976	26256977	ENST00000495146	+	1975
chr3	196466086	196469319	chr3	196466728	196466729	ENST00000327134	+	1950	chr3	196593426	196596208	chr3	196594727	196594728	ENST00000323460	+	1825
chr16	88849593	88852910	chr16	88851618	88851619	ENST00000301015	-	2225	chr16	88922325	88924906	chr16	88923373	88923374	ENST00000268695	-	2200
chr15	51056442	51059084	chr15	51058004	51058005	ENST00000261854	-	1950	chr15	51199726	51202707	chr15	51200869	51200870	ENST00000561441	+	1750
chr17	57181395	57188655	chr17	57184281	57184282	ENST00000393066	-	1450	chr17	57967866	57973406	chr17	57970447	57970448	ENST00000472940	+	2250
chr1	247093552	247097819	chr1	247094725	247094726	ENST00000326225	-	1875	chr1	247240197	247243590	chr1	247242112	247242113	ENST00000474541	-	1450
chr1	247093628	247096678	chr1	247094725	247094726	ENST00000326225	-	1875	chr1	247168698	247172076	chr1	247171394	247171395	ENST00000487338	-	2300
chr13	20355390	20358887	chr13	20357081	20357082	ENST00000492741	-	2175	chr13	20530172	20533680	chr13	20532810	20532811	ENST00000456228	+	1875
chr13	20355433	20360036	chr13	20357081	20357082	ENST00000492741	-	2175	chr13	20433941	20440738	chr13	20437775	20437776	ENST00000337963	-	1825
chr10	5725094	5729377	chr10	5726801	5726802	ENST00000328090	+	1850	chr10	5927689	5933777	chr10	5931535	5931536	ENST00000397269	+	1575
chr1	117909019	117912614	chr1	117910071	117910072	ENST00000356554	+	2175	chr1	118471558	118474753	chr1	118472252	118472253	ENST00000369443	-	1900
chr17	57182746	57185047	chr17	57184281	57184282	ENST00000393066	-	1450	chr17	65240971	65242827	chr17	65242104	65242105	ENST00000581159	-	2225
chr1	247170921	247172935	chr1	247171394	247171395	ENST00000487338	-	2300	chr1	247241527	247243070	chr1	247242112	247242113	ENST00000474541	-	1450
chr3	33757949	33761101	chr3	33759847	33759848	ENST00000359576	-	1525	chr3	33838996	33841604	chr3	33839844	33839845	ENST00000307296	+	1575
chr5	179718755	179721306	chr5	179719098	179719099	ENST00000343111	-	2075	chr5	179919977	179922949	chr5	179921417	179921418	ENST00000261951	+	1050
chr1	180599642	180602569	chr1	180601140	180601141	ENST00000367590	+	1650	chr1	180990925	180993189	chr1	180992046	180992047	ENST00000258301	-	2050
chr10	5725503	5729426	chr10	5726801	5726802	ENST00000328090	+	1850	chr10	5853777	5860412	chr10	5855511	5855512	ENST00000380191	-	1950
chr11	13481708	13485111	chr11	13484843	13484844	ENST00000525108	-	1825	chr11	13688944	13690890	chr11	13690217	13690218	ENST00000354817	+	2125
chr16	88918775	88926370	chr16	88923373	88923374	ENST00000268695	-	2200	chr16	88999332	89011272	chr16	89008251	89008252	ENST00000569443	-	2225
chr3	135969104	135971090	chr3	135969148	135969149	ENST00000251654	+	1400	chr3	136470031	136473091	chr3	136471219	136471220	ENST00000483235	-	1625
chr13	20432978	20439801	chr13	20437775	20437776	ENST00000337963	-	1825	chr13	20529262	20535848	chr13	20532810	20532811	ENST00000456228	+	1875
chr14	67706036	67709545	chr14	67707826	67707827	ENST00000261681	+	1750	chr14	67826326	67828458	chr14	67826507	67826508	ENST00000554087	-	1750
chr9	127176529	127178949	chr9	127177720	127177721	ENST00000536392	-	1575	chr9	127531203	127534073	chr9	127533588	127533589	ENST00000416460	-	1850
chr2	86332345	86334570	chr2	86333277	86333278	ENST00000263857	-	1250	chr2	86419598	86423755	chr2	86422892	86422893	ENST00000410111	-	2175
chr8	25040359	25044621	chr8	25042238	25042239	ENST00000410074	+	1600	chr8	25314379	25318708	chr8	25316513	25316514	ENST00000330560	+	1675
chr6	35886849	35889245	chr6	35889118	35889119	ENST00000373825	-	1650	chr6	35993978	35995751	chr6	35995488	35995489	ENST00000229795	+	1975
chr10	17494424	17496951	chr10	17496328	17496329	ENST00000377602	-	1575	chr20	47894560	47896768	chr20	47894962	47894963	ENST00000371754	-	1925
chr10	17494424	17496951	chr10	17496328	17496329	ENST00000377602	-	1575	chr20	47894560	47896768	chr20	47894962	47894963	ENST00000371754	-	1925
chr3	169897681	169901014	chr3	169899536	169899537	ENST00000466189	-	1775	chr3	169938029	169940751	chr3	169940153	169940154	ENST00000295797	+	1800
chr10	5852595	5861125	chr10	5855511	5855512	ENST00000380191	-	1950	chr10	5921136	5936216	chr10	5931535	5931536	ENST00000397269	+	1575
chrX	122991942	122997012	chrX	122993614	122993615	ENST00000481776	+	1950	chrX	123092778	123096992	chrX	123094062	123094063	ENST00000394477	+	2300
chr3	136469358	136473351	chr3	136471219	136471220	ENST00000483235	-	1625	chr3	136579831	136582888	chr3	136581050	136581051	ENST00000288986	+	1725
chr2	9143358	9147216	chr2	9143941	9143942	ENST00000305997	-	1975	chr2	9563185	9565865	chr2	9563697	9563698	ENST00000238112	+	1050
chr3	25697551	25710933	chr3	25706397	25706398	ENST00000424225	-	1775	chr3	25822809	25833100	chr3	25831529	25831530	ENST00000417874	-	1825
chr20	46130061	46132306	chr20	46130601	46130602	ENST00000341724	+	1800	chr20	47536677	47538758	chr20	47538427	47538428	ENST00000371917	+	1275
chr22	19418740	19420583	chr22	19419255	19419256	ENST00000263208	-	1300	chr3	143689830	143691587	chr3	143691479	143691480	ENST00000493396	+	2050
chr22	19418740	19420583	chr22	19419255	19419256	ENST00000263208	-	1300	chr3	143689830	143691587	chr3	143691479	143691480	ENST00000493396	+	2050
chr11	34073205	34075094	chr11	34073230	34073231	ENST00000341394	+	1875	chr11	34377742	34380453	chr11	34379554	34379555	ENST00000435224	-	1700
chr19	33164774	33167262	chr19	33166101	33166102	ENST00000306065	-	1700	chr19	33554997	33556964	chr19	33555823	33555824	ENST00000254260	-	1700
chr1	111681942	111683758	chr1	111682249	111682250	ENST00000545121	+	1425	chr1	112160711	112162653	chr1	112162399	112162400	ENST00000433097	+	1675
chr17	58467432	58470352	chr17	58469585	58469586	ENST00000300896	-	1075	chr17	66286953	66288966	chr17	66287659	66287660	ENST00000452479	+	875
chr17	2206667	2208786	chr17	2207064	2207065	ENST00000263073	-	1375	chr17	2238413	2241438	chr17	2240806	2240807	ENST00000268989	+	1150
chr2	75871102	75877251	chr2	75873920	75873921	ENST00000358788	+	1825	chr2	75934765	75942175	chr2	75938114	75938115	ENST00000321027	-	1175
chr17	58467570	58474513	chr17	58469585	58469586	ENST00000300896	-	1075	chr17	58675781	58681359	chr17	58677554	58677555	ENST00000305921	+	1975
chr17	58468420	58471942	chr17	58469585	58469586	ENST00000300896	-	1075	chr17	58601233	58606448	chr17	58603579	58603580	ENST00000083182	-	1875
chr2	160469233	160474753	chr2	160473202	160473203	ENST00000392783	-	1675	chr2	160565428	160572282	chr2	160569000	160569001	ENST00000409175	+	1850
chr12	83078982	83081661	chr12	83080659	83080660	ENST00000551915	+	850	chr3	63848631	63850534	chr3	63850233	63850234	ENST00000474112	+	1475
chr12	83078982	83081661	chr12	83080659	83080660	ENST00000551915	+	850	chr3	63848631	63850534	chr3	63850233	63850234	ENST00000474112	+	1475
chr9	94875796	94880000	chr9	94877689	94877690	ENST00000486910	-	950	chr9	95086097	95090720	chr9	95087766	95087767	ENST00000375587	+	1625
chr14	76041089	76048468	chr14	76044960	76044961	ENST00000238667	+	1700	chr14	76124216	76128127	chr14	76127335	76127336	ENST00000557003	+	1900
chr2	9343964	9348120	chr2	9346894	9346895	ENST00000281419	+	1825	chr2	9563292	9566474	chr2	9563697	9563698	ENST00000238112	+	1050
chr7	91507490	91513359	chr7	91510003	91510004	ENST00000454222	-	1025	chr7	91568781	91573074	chr7	91570181	91570182	ENST00000356239	+	1525
chr3	9004131	9006856	chr3	9005185	9005186	ENST00000264926	-	1650	chr3	9438978	9440709	chr3	9439299	9439300	ENST00000431285	+	1975
chr11	118306689	118308368	chr11	118307205	118307206	ENST00000534358	+	1975	chr11	118660627	118662954	chr11	118661844	118661845	ENST00000264018	-	2025
chr9	135228827	135231595	chr9	135230371	135230372	ENST00000372169	-	725	chr9	135545032	135546932	chr9	135545787	135545788	ENST00000372153	-	1525
chr8	97272301	97273960	chr8	97273943	97273944	ENST00000517309	+	1700	chr8	98655808	98657484	chr8	98656407	98656408	ENST00000336273	+	1925
chr15	70388787	70390778	chr15	70390514	70390515	ENST00000558939	-	1775	chr9	72873616	72875278	chr9	72873937	72873938	ENST00000361138	+	1425
chr15	70388787	70390778	chr15	70390514	70390515	ENST00000558939	-	1775	chr9	72873616	72875278	chr9	72873937	72873938	ENST00000361138	+	1425
chr16	69456628	69460851	chr16	69458428	69458429	ENST00000512062	+	1475	chr16	69598482	69601931	chr16	69598997	69598998	ENST00000426654	+	1900
chr17	57783586	57786233	chr17	57784863	57784864	ENST00000262291	+	2125	chr20	46130204	46131886	chr20	46130601	46130602	ENST00000341724	+	1800
chr17	57783586	57786233	chr17	57784863	57784864	ENST00000262291	+	2125	chr20	46130204	46131886	chr20	46130601	46130602	ENST00000341724	+	1800
chr16	71841032	71844957	chr16	71843103	71843104	ENST00000299980	-	2125	chr16	71878188	71881982	chr16	71879899	71879900	ENST00000568581	+	1425
chr9	34123989	34127912	chr9	34126770	34126771	ENST00000361264	-	1275	chr9	34177865	34180389	chr9	34179003	34179004	ENST00000543944	+	1950
chr13	41238911	41240772	chr13	41240733	41240734	ENST00000379561	-	1750	chr13	41634999	41636721	chr13	41635575	41635576	ENST00000405737	-	1325
chr10	88280819	88284067	chr10	88281571	88281572	ENST00000342368	-	1600	chr10	88853393	88856181	chr10	88854622	88854623	ENST00000277865	-	1200
chr1	15942391	15946292	chr1	15943995	15943996	ENST00000480945	+	1800	chr1	16006682	16012865	chr1	16010827	16010828	ENST00000375799	+	1675
chr14	78223413	78230716	chr14	78227549	78227550	ENST00000556428	-	1275	chr14	78265065	78269735	chr14	78266426	78266427	ENST00000238561	+	1150
chr1	236766250	236768623	chr1	236767803	236767804	ENST00000366581	-	1875	chr1	236958447	236960032	chr1	236958610	236958611	ENST00000366577	+	1900
chr1	114353086	114356383	chr1	114355097	114355098	ENST00000261441	-	2050	chr1	114467552	114475359	chr1	114471814	114471815	ENST00000426820	+	1975
chr4	83818065	83823341	chr4	83821690	83821691	ENST00000355196	-	2600	chr4	83930143	83936282	chr4	83934078	83934079	ENST00000505397	-	1900
chr4	83821250	83823910	chr4	83821690	83821691	ENST00000355196	-	2600	chr4	83953815	83957501	chr4	83955600	83955601	ENST00000509093	+	1925
chr8	124779119	124781941	chr8	124780696	124780697	ENST00000521166	+	1900	chr8	125550806	125552574	chr8	125551349	125551350	ENST00000519776	-	1500
chr16	50098921	50101956	chr16	50099852	50099853	ENST00000299192	+	1525	chr16	50185074	50190793	chr16	50186829	50186830	ENST00000436909	+	1425
chr1	114354097	114356743	chr1	114355097	114355098	ENST00000261441	-	2050	chr1	115299184	115300784	chr1	115300647	115300648	ENST00000530886	-	1850
chr8	90995093	90997814	chr8	90996943	90996944	ENST00000265433	-	1450	chr8	91010770	91014611	chr8	91013633	91013634	ENST00000220764	+	1500
chr4	83930602	83937353	chr4	83934078	83934079	ENST00000505397	-	1900	chr4	83952954	83957880	chr4	83955600	83955601	ENST00000509093	+	1925
chr5	68626462	68633259	chr5	68628635	68628636	ENST00000383374	-	2025	chr5	68656360	68665608	chr5	68665124	68665125	ENST00000361732	+	1400
chr18	9333428	9336571	chr18	9334765	9334766	ENST00000262120	+	1475	chr18	9474335	9476989	chr18	9475007	9475008	ENST00000019317	+	2150
chr5	68664038	68667254	chr5	68665124	68665125	ENST00000361732	+	1400	chr5	68786797	68789724	chr5	68788119	68788120	ENST00000355237	+	1800
chr5	172409752	172412883	chr5	172410760	172410761	ENST00000519374	+	2125	chr5	172481287	172486426	chr5	172483355	172483356	ENST00000296953	+	1950
chr1	151421812	151434588	chr1	151431940	151431941	ENST00000271715	-	1900	chr1	151506621	151515599	chr1	151512781	151512782	ENST00000392712	+	1950
chr5	64919090	64922129	chr5	64920543	64920544	ENST00000399438	+	1425	chr5	65016586	65020636	chr5	65018023	65018024	ENST00000380985	+	2175
chr2	135674917	135677204	chr2	135676395	135676396	ENST00000264157	+	1650	chr2	136287901	136290634	chr2	136289025	136289026	ENST00000483021	+	1625
chr2	135675599	135677186	chr2	135676395	135676396	ENST00000264157	+	1650	chr2	136741729	136743987	chr2	136743669	136743670	ENST00000456565	-	1675
chr1	115050258	115056098	chr1	115053780	115053781	ENST00000358465	-	2225	chr3	63847961	63851291	chr3	63850233	63850234	ENST00000474112	+	1475
chr1	115050258	115056098	chr1	115053780	115053781	ENST00000358465	-	2225	chr3	63847961	63851291	chr3	63850233	63850234	ENST00000474112	+	1475
chr3	132378603	132380974	chr3	132379566	132379567	ENST00000264990	-	2450	chr3	132439663	132442492	chr3	132441302	132441303	ENST00000471702	-	1275
chr11	47787394	47789838	chr11	47788852	47788853	ENST00000263773	-	975	chr11	47868299	47871448	chr11	47870018	47870019	ENST00000378460	-	1450
chr11	67980044	67982287	chr11	67981294	67981295	ENST00000405515	-	1825	chr11	68607836	68609854	chr11	68609398	68609399	ENST00000265641	-	1325
chr11	67980249	67984222	chr11	67981294	67981295	ENST00000405515	-	1825	chr11	68078427	68081768	chr11	68080077	68080078	ENST00000294304	+	1725
chr5	65016272	65020303	chr5	65018023	65018024	ENST00000380985	+	2175	chr5	65219727	65223216	chr5	65222303	65222304	ENST00000284037	+	1275
chr1	115052187	115055036	chr1	115053780	115053781	ENST00000358465	-	2225	chr8	97272363	97274429	chr8	97273943	97273944	ENST00000517309	+	1700
chr1	115052187	115055036	chr1	115053780	115053781	ENST00000358465	-	2225	chr8	97272363	97274429	chr8	97273943	97273944	ENST00000517309	+	1700
chr1	115052409	115054724	chr1	115053780	115053781	ENST00000358465	-	2225	chr17	58468139	58469938	chr17	58469585	58469586	ENST00000300896	-	1075
chr13	41633484	41637553	chr13	41635575	41635576	ENST00000405737	-	1325	chr13	41884405	41888780	chr13	41885341	41885342	ENST00000379367	+	2275
chr1	115052409	115054724	chr1	115053780	115053781	ENST00000358465	-	2225	chr17	58468139	58469938	chr17	58469585	58469586	ENST00000300896	-	1075
chr1	178693031	178696022	chr1	178694300	178694301	ENST00000495034	+	1900	chr1	178993845	178996341	chr1	178995031	178995032	ENST00000263733	+	1400
chr13	25859859	25863418	chr13	25862146	25862147	ENST00000381801	-	1400	chr13	25873505	25877542	chr13	25875662	25875663	ENST00000381736	+	2300
chr7	129709586	129711996	chr7	129710350	129710351	ENST00000335420	+	1775	chr7	129843770	129846372	chr7	129845337	129845338	ENST00000397622	-	1300
chr9	135545320	135546871	chr9	135545787	135545788	ENST00000372153	-	1525	chr9	135818772	135820315	chr9	135820007	135820008	ENST00000298552	-	2250
chr1	115053337	115055398	chr1	115053780	115053781	ENST00000358465	-	2225	chr2	172016775	172018686	chr2	172017409	172017410	ENST00000409443	-	2275
chr1	115053337	115055398	chr1	115053780	115053781	ENST00000358465	-	2225	chr2	172016775	172018686	chr2	172017409	172017410	ENST00000409443	-	2275
chr7	73866958	73871256	chr7	73868120	73868121	ENST00000265755	+	2225	chr7	74070173	74073203	chr7	74072011	74072012	ENST00000324896	+	1900
chr13	21096576	21102175	chr13	21099995	21099996	ENST00000382812	-	1775	chr13	21139689	21143137	chr13	21140585	21140586	ENST00000382778	+	975
chr13	21099445	21101047	chr13	21099995	21099996	ENST00000382812	-	1775	chr13	21476876	21478673	chr13	21477186	21477187	ENST00000490513	-	1600
chr7	129844625	129846143	chr7	129845337	129845338	ENST00000397622	-	1300	chr7	130351925	130354513	chr7	130353597	130353598	ENST00000445977	-	1275
chr5	122757927	122766414	chr5	122759285	122759286	ENST00000508442	-	1325	chr5	122844965	122849569	chr5	122847793	122847794	ENST00000345990	+	2000
chr4	99181647	99184072	chr4	99182535	99182536	ENST00000509011	+	1625	chr4	99579310	99582613	chr4	99579779	99579780	ENST00000305798	-	2100
chr10	128592888	128595599	chr10	128593978	128593979	ENST00000280333	+	2200	chr17	57970265	57971994	chr17	57970447	57970448	ENST00000472940	+	2250
chr10	128592888	128595599	chr10	128593978	128593979	ENST00000280333	+	2200	chr17	57970265	57971994	chr17	57970447	57970448	ENST00000472940	+	2250
chr19	2148412	2153587	chr19	2151555	2151556	ENST00000345016	-	1500	chr19	2160556	2166240	chr19	2164148	2164149	ENST00000398665	+	1350
chr10	35414990	35417120	chr10	35415719	35415720	ENST00000474362	+	1550	chr10	35623538	35626714	chr10	35625455	35625456	ENST00000537547	+	2050
chr16	81347539	81350872	chr16	81348557	81348558	ENST00000248272	+	1775	chr16	81478035	81482618	chr16	81478775	81478776	ENST00000537098	+	1075
chr8	95564633	95567300	chr8	95565756	95565757	ENST00000421249	-	1775	chr8	95651331	95653603	chr8	95653302	95653303	ENST00000423620	+	1425
chr8	95564818	95567463	chr8	95565756	95565757	ENST00000421249	-	1775	chr8	95729750	95733556	chr8	95732128	95732129	ENST00000414645	+	1200
chr9	26890972	26893985	chr9	26892801	26892802	ENST00000333916	-	1575	chr9	26945405	26948624	chr9	26947460	26947461	ENST00000397292	-	2100
chr15	72666558	72670735	chr15	72668321	72668322	ENST00000379915	-	2050	chr15	72765041	72769475	chr15	72766667	72766668	ENST00000379887	+	2125
chr15	41408234	41410047	chr15	41408551	41408552	ENST00000361937	-	1825	chr15	41521744	41524372	chr15	41523037	41523038	ENST00000558351	+	1475
chr13	26791639	26801006	chr13	26796397	26796398	ENST00000468480	-	1250	chr13	26823323	26834112	chr13	26828276	26828277	ENST00000381527	+	1900
chr8	95650400	95656999	chr8	95653302	95653303	ENST00000423620	+	1425	chr8	95729644	95735467	chr8	95732128	95732129	ENST00000414645	+	1200
chr17	56768330	56770061	chr17	56769934	56769935	ENST00000337432	+	1575	chr17	57968847	57971300	chr17	57970447	57970448	ENST00000472940	+	2250
chr12	65148774	65157978	chr12	65153226	65153227	ENST00000258145	-	2075	chr12	65171970	65176271	chr12	65174589	65174590	ENST00000229088	+	1775
chr17	56769284	56772110	chr17	56769934	56769935	ENST00000337432	+	1575	chr17	57182586	57184457	chr17	57184281	57184282	ENST00000393066	-	1450
chr7	135192080	135200204	chr7	135194874	135194875	ENST00000541284	-	1875	chr7	135240617	135244038	chr7	135242667	135242668	ENST00000285968	+	1900
chr6	143265912	143267606	chr6	143266337	143266338	ENST00000367603	-	1800	chr6	143380498	143382671	chr6	143381633	143381634	ENST00000367601	+	1925
chr7	104652163	104655972	chr7	104654626	104654627	ENST00000311117	+	2050	chr7	105160292	105163807	chr7	105162713	105162714	ENST00000481939	-	2725
chr14	75178281	75180740	chr14	75179817	75179818	ENST00000356357	-	1775	chr14	75228740	75230588	chr14	75230069	75230070	ENST00000552421	+	2175
chr20	35722732	35725824	chr20	35724397	35724398	ENST00000373664	-	1850	chr20	35806104	35809302	chr20	35807449	35807450	ENST00000237530	+	1500
chr3	49376293	49379620	chr3	49377503	49377504	ENST00000265560	-	2100	chr3	49448851	49451356	chr3	49449634	49449635	ENST00000418115	-	1800
chr14	96827813	96831839	chr14	96830206	96830207	ENST00000359933	-	2100	chr14	96966913	96970397	chr14	96968710	96968711	ENST00000216277	+	1600
chr13	79979196	79982246	chr13	79980349	79980350	ENST00000438737	-	1325	chr13	80054691	80057070	chr13	80055287	80055288	ENST00000218652	+	1925
chr2	170439754	170442514	chr2	170440850	170440851	ENST00000260970	+	2025	chr2	170549496	170552487	chr2	170550998	170550999	ENST00000498202	+	1650
chr12	50503774	50506593	chr12	50505980	50505981	ENST00000548468	+	1875	chr2	166650902	166652995	chr2	166651191	166651192	ENST00000392701	-	1925
chr12	50503774	50506593	chr12	50505980	50505981	ENST00000548468	+	1875	chr2	166650902	166652995	chr2	166651191	166651192	ENST00000392701	-	1925
chr13	103246213	103250563	chr13	103249353	103249354	ENST00000376065	+	1900	chr13	103450269	103453968	chr13	103451399	103451400	ENST00000257336	+	975
chr11	77529037	77533619	chr11	77532062	77532063	ENST00000308488	-	1725	chr11	77704156	77707997	chr11	77705723	77705724	ENST00000534064	-	1200
chr17	76777558	76780349	chr17	76778375	76778376	ENST00000361101	-	1700	chr17	76835859	76838706	chr17	76836968	76836969	ENST00000312010	-	1675
chr10	15139024	15140754	chr10	15139236	15139237	ENST00000451677	+	1175	chr10	15209049	15211740	chr10	15210691	15210692	ENST00000378165	-	1425
chr7	39660619	39666370	chr7	39663082	39663083	ENST00000005257	+	1600	chr7	39771379	39777121	chr7	39773231	39773232	ENST00000340510	+	1900
chrX	40593672	40595428	chrX	40594782	40594783	ENST00000324817	-	1875	chrX	40944087	40945670	chrX	40944888	40944889	ENST00000378308	+	2075
chr8	101319467	101324057	chr8	101322554	101322555	ENST00000341084	-	1925	chr8	101570465	101573187	chr8	101571969	101571970	ENST00000520552	-	1450
chr3	63848567	63851256	chr3	63850233	63850234	ENST00000474112	+	1475	chr6	151771842	151774778	chr6	151773258	151773259	ENST00000367303	-	1575
chr3	63848567	63851256	chr3	63850233	63850234	ENST00000474112	+	1475	chr6	151771842	151774778	chr6	151773258	151773259	ENST00000367303	-	1575
chr20	49405981	49413787	chr20	49411431	49411432	ENST00000358791	+	1925	chr20	49544138	49551307	chr20	49547957	49547958	ENST00000396032	-	1800
chr9	131313676	131315242	chr9	131314866	131314867	ENST00000358161	+	1800	chr9	131709308	131711552	chr9	131709978	131709979	ENST00000372577	+	1350
chr12	42536858	42540358	chr12	42538680	42538681	ENST00000398675	-	2025	chr12	42630016	42633914	chr12	42632150	42632151	ENST00000547254	-	900
chr12	42537125	42540322	chr12	42538680	42538681	ENST00000398675	-	2025	chr12	42717377	42722308	chr12	42719947	42719948	ENST00000337898	+	2100
chr6	47444065	47445886	chr6	47445525	47445526	ENST00000359314	+	1925	chr7	32533696	32535787	chr7	32535038	32535039	ENST00000485228	+	1475
chr6	47444065	47445886	chr6	47445525	47445526	ENST00000359314	+	1925	chr7	32533696	32535787	chr7	32535038	32535039	ENST00000485228	+	1475
chr5	112823438	112825437	chr5	112824526	112824527	ENST00000408903	-	1600	chr5	112848716	112850682	chr5	112849380	112849381	ENST00000161863	+	1825
chr2	69614340	69616636	chr2	69614381	69614382	ENST00000357308	-	1500	chr2	69869816	69871433	chr2	69870848	69870849	ENST00000406297	-	1975
chr1	233430068	233432791	chr1	233431458	233431459	ENST00000430153	-	1450	chr1	233463013	233464659	chr1	233463514	233463515	ENST00000366623	+	1625
chr17	64960060	64962570	chr17	64961026	64961027	ENST00000262138	+	1875	chr8	102504646	102506203	chr8	102504660	102504661	ENST00000251808	+	1775
chr17	64960060	64962570	chr17	64961026	64961027	ENST00000262138	+	1875	chr8	102504646	102506203	chr8	102504660	102504661	ENST00000251808	+	1775
chr17	64960092	64962441	chr17	64961026	64961027	ENST00000262138	+	1875	chr3	123304327	123306317	chr3	123304389	123304390	ENST00000485162	+	1225
chr6	34758735	34762506	chr6	34759857	34759858	ENST00000192788	+	1700	chr6	34853024	34858695	chr6	34857042	34857043	ENST00000360359	+	2025
chr17	64960092	64962441	chr17	64961026	64961027	ENST00000262138	+	1875	chr3	123304327	123306317	chr3	123304389	123304390	ENST00000485162	+	1225
chr1	108741167	108745172	chr1	108742979	108742980	ENST00000565488	-	2000	chr17	58677031	58680031	chr17	58677554	58677555	ENST00000305921	+	1975
chr14	77559718	77567556	chr14	77564654	77564655	ENST00000557752	+	1925	chr14	77781210	77790475	chr14	77787226	77787227	ENST00000261534	-	1675
chr4	146017730	146021715	chr4	146019692	146019693	ENST00000514390	-	1700	chr4	146099065	146102451	chr4	146101312	146101313	ENST00000447906	-	1600
chr1	200588707	200591184	chr1	200589861	200589862	ENST00000367350	-	1075	chr1	200637703	200640234	chr1	200639034	200639035	ENST00000447706	-	1700
chr14	50697046	50701350	chr14	50698275	50698276	ENST00000216373	-	2075	chr14	50777331	50780383	chr14	50779265	50779266	ENST00000267436	-	1150
chr4	140097121	140099997	chr4	140098371	140098372	ENST00000394235	-	1700	chr4	140220900	140225366	chr4	140222609	140222610	ENST00000296543	+	1925
chr20	25370156	25372734	chr20	25371618	25371619	ENST00000376542	-	1850	chr20	25387934	25390472	chr20	25388363	25388364	ENST00000262460	+	1225
chr17	75081403	75086665	chr17	75084831	75084832	ENST00000392476	+	1250	chr17	75135408	75138962	chr17	75137005	75137006	ENST00000430767	+	2025
chr1	200635900	200644514	chr1	200639034	200639035	ENST00000447706	-	1700	chr1	200703167	200711149	chr1	200708686	200708687	ENST00000358823	+	2100
chr1	108742961	108744924	chr1	108742979	108742980	ENST00000565488	-	2000	chrX	70585645	70587995	chrX	70586114	70586115	ENST00000423759	+	1800
chr1	108742961	108744924	chr1	108742979	108742980	ENST00000565488	-	2000	chrX	70585645	70587995	chrX	70586114	70586115	ENST00000423759	+	1800
chr14	69618202	69621032	chr14	69619842	69619843	ENST00000341516	-	2200	chr14	69863576	69866501	chr14	69864732	69864733	ENST00000556125	+	1800
chr14	69618275	69624022	chr14	69619842	69619843	ENST00000341516	-	2200	chr14	69655650	69660294	chr14	69658228	69658229	ENST00000409018	+	1900
chr1	153699430	153701547	chr1	153700543	153700544	ENST00000456435	+	450	chr1	153893565	153895608	chr1	153895450	153895451	ENST00000368655	-	1825
chr9	4791458	4797811	chr9	4792869	4792870	ENST00000381750	+	2000	chr9	4983191	4985506	chr9	4985086	4985087	ENST00000539801	+	1700
chr14	50778052	50780948	chr14	50779265	50779266	ENST00000267436	-	1150	chr14	50994884	50999794	chr14	50999326	50999327	ENST00000013125	-	2175
chr5	176427866	176435577	chr5	176433751	176433752	ENST00000511320	-	2125	chr5	176445270	176452161	chr5	176449697	176449698	ENST00000358149	+	1575
chr6	155053716	155055790	chr6	155054459	155054460	ENST00000367178	+	1975	chr7	74070760	74072764	chr7	74072011	74072012	ENST00000324896	+	1900
chr14	69445219	69447444	chr14	69446156	69446157	ENST00000193403	-	1725	chr3	183352751	183354827	chr3	183353356	183353357	ENST00000242810	+	1875
chr14	69445219	69447444	chr14	69446156	69446157	ENST00000193403	-	1725	chr3	183352751	183354827	chr3	183353356	183353357	ENST00000242810	+	1875
chr15	22832309	22834961	chr15	22833395	22833396	ENST00000283645	+	1375	chr15	22892518	22894311	chr15	22892663	22892664	ENST00000313077	+	1675
chr8	48870802	48875414	chr8	48872742	48872743	ENST00000338368	-	1775	chr8	48919446	48923770	chr8	48920960	48920961	ENST00000523111	+	1050
chr6	155053716	155055790	chr6	155054459	155054460	ENST00000367178	+	1975	chr7	74070760	74072764	chr7	74072011	74072012	ENST00000324896	+	1900
chr7	141400254	141403099	chr7	141401952	141401953	ENST00000536163	-	1800	chr7	141438132	141440667	chr7	141438200	141438201	ENST00000465582	+	1350
chr19	4908501	4917388	chr19	4909510	4909511	ENST00000396708	+	800	chr19	4967738	4973158	chr19	4969124	4969125	ENST00000159111	+	1225
chr3	32610990	32612764	chr3	32612365	32612366	ENST00000273130	-	1750	chr3	32725957	32727931	chr3	32726637	32726638	ENST00000328834	+	1575
chr15	56534684	56537162	chr15	56535482	56535483	ENST00000423270	-	1875	chr15	57025486	57027553	chr15	57026283	57026284	ENST00000396245	-	1075
chr10	32217455	32219004	chr10	32217741	32217742	ENST00000375250	-	2125	chr10	32635371	32637740	chr10	32636145	32636146	ENST00000319778	-	1950
chr6	11093400	11095150	chr6	11094039	11094040	ENST00000376935	+	1975	chr6	11232098	11234841	chr6	11232914	11232915	ENST00000379446	-	1950
chr19	47613921	47619118	chr19	47617008	47617009	ENST00000253048	-	1175	chr19	47632386	47638089	chr19	47634080	47634081	ENST00000270225	+	1650
chr4	39638771	39641512	chr4	39640709	39640710	ENST00000295958	-	1750	chr4	39978037	39980791	chr4	39979575	39979576	ENST00000503396	-	1775
chr4	39639050	39643180	chr4	39640709	39640710	ENST00000295958	-	1750	chr4	39697472	39703094	chr4	39699664	39699665	ENST00000261427	+	1850
chr6	111800166	111807211	chr6	111804917	111804918	ENST00000422377	-	1775	chr6	111921266	111930352	chr6	111927480	111927481	ENST00000340026	-	2125
chr10	32342864	32345812	chr10	32345358	32345359	ENST00000302418	-	1950	chr10	32635211	32637250	chr10	32636145	32636146	ENST00000319778	-	1950
chr15	57023339	57026885	chr15	57026283	57026284	ENST00000396245	-	1075	chr15	57210242	57212303	chr15	57210821	57210822	ENST00000438423	+	1725
chr4	39698032	39700462	chr4	39699664	39699665	ENST00000261427	+	1850	chr4	39977441	39980121	chr4	39979575	39979576	ENST00000503396	-	1775
chr2	26100054	26102283	chr2	26101384	26101385	ENST00000435504	-	1125	chr2	26205409	26207035	chr2	26205617	26205618	ENST00000405914	-	1075
chr14	45601339	45606570	chr14	45605150	45605151	ENST00000267430	+	1900	chr14	45722040	45724234	chr14	45722604	45722605	ENST00000310806	-	2250
chr10	74385562	74387475	chr10	74385898	74385899	ENST00000398761	-	1875	chr10	74450427	74454397	chr10	74451889	74451890	ENST00000373053	+	1275
chr14	73493015	73496024	chr14	73493919	73493920	ENST00000556143	-	1400	chr14	73523735	73526013	chr14	73525144	73525145	ENST00000261973	+	2150
chr17	57969181	57971949	chr17	57970447	57970448	ENST00000472940	+	2250	chr20	47443440	47445201	chr20	47444419	47444420	ENST00000396220	-	1850
chr17	57969181	57971949	chr17	57970447	57970448	ENST00000472940	+	2250	chr20	47443440	47445201	chr20	47444419	47444420	ENST00000396220	-	1850
chr14	78266285	78268039	chr14	78266426	78266427	ENST00000238561	+	1150	chr17	58469089	58471364	chr17	58469585	58469586	ENST00000300896	-	1075
chr17	57969708	57971563	chr17	57970447	57970448	ENST00000472940	+	2250	chr20	60640359	60642669	chr20	60640865	60640866	ENST00000252996	-	1250
chr17	57969708	57971563	chr17	57970447	57970448	ENST00000472940	+	2250	chr20	60640359	60642669	chr20	60640865	60640866	ENST00000252996	-	1250
chr20	48328478	48331392	chr20	48330414	48330415	ENST00000371711	-	1750	chr20	48428218	48430814	chr20	48429250	48429251	ENST00000417961	+	1275
chr1	33005006	33006536	chr1	33005028	33005029	ENST00000373510	+	1250	chr1	33116090	33117896	chr1	33116165	33116166	ENST00000341885	-	1950
chr1	180470493	180473506	chr1	180472088	180472089	ENST00000367595	-	2050	chr1	180597830	180602116	chr1	180601140	180601141	ENST00000367590	+	1650
chr1	180470764	180472384	chr1	180472088	180472089	ENST00000367595	-	2050	chr1	180991464	180993107	chr1	180992046	180992047	ENST00000258301	-	2050
chr1	180471844	180473549	chr1	180472088	180472089	ENST00000367595	-	2050	chr1	182806960	182809531	chr1	182808504	182808505	ENST00000367549	+	2025
chr17	56769040	56770557	chr17	56769934	56769935	ENST00000337432	+	1575	chr6	42418840	42421165	chr6	42419788	42419789	ENST00000372917	-	2075
chr17	56769040	56770557	chr17	56769934	56769935	ENST00000337432	+	1575	chr6	42418840	42421165	chr6	42419788	42419789	ENST00000372917	-	2075
chr6	83774027	83776822	chr6	83775559	83775560	ENST00000369747	-	1325	chr6	84138609	84140988	chr6	84140796	84140797	ENST00000543031	-	1725
chr14	78266285	78268039	chr14	78266426	78266427	ENST00000238561	+	1150	chr17	58469089	58471364	chr17	58469585	58469586	ENST00000300896	-	1075
chr20	33998356	34000008	chr20	33999943	33999944	ENST00000374385	-	1550	chr20	34041425	34043319	chr20	34043150	34043151	ENST00000397527	+	2050
chr12	112818291	112820853	chr12	112819895	112819896	ENST00000430131	-	1425	chr12	112855126	112857349	chr12	112856713	112856714	ENST00000392597	+	2150
chr9	107687369	107691649	chr9	107690517	107690518	ENST00000374736	-	1725	chr9	108006197	108009884	chr9	108006903	108006904	ENST00000374720	+	1875
chr2	65355929	65359841	chr2	65357239	65357240	ENST00000409784	-	1775	chr2	65453009	65456600	chr2	65454887	65454888	ENST00000260641	+	2225
chr1	62188914	62195188	chr1	62191094	62191095	ENST00000294613	-	1775	chr1	62202056	62212232	chr1	62208149	62208150	ENST00000371158	+	1700
chr2	48539557	48542081	chr2	48541776	48541777	ENST00000413569	+	2100	chr2	48666297	48668955	chr2	48667737	48667738	ENST00000431614	+	725
chr19	32834674	32836739	chr19	32836514	32836515	ENST00000355898	+	1375	chr19	32896386	32899857	chr19	32896655	32896656	ENST00000392250	+	1125
chr12	67462768	67464522	chr12	67462941	67462942	ENST00000535721	-	1925	chr12	67660868	67664362	chr12	67663061	67663062	ENST00000545606	+	2000
chr14	77782973	77788435	chr14	77787226	77787227	ENST00000261534	-	1675	chr14	78081530	78084931	chr14	78083115	78083116	ENST00000216484	-	2000
chr8	124404505	124411576	chr8	124408704	124408705	ENST00000287394	-	1625	chr8	124423647	124430734	chr8	124429043	124429044	ENST00000523551	+	1500
chr1	234613575	234616118	chr1	234614848	234614849	ENST00000040877	-	1200	chr1	235666376	235668923	chr1	235667780	235667781	ENST00000366600	-	2075
chr1	235488736	235493899	chr1	235491533	235491534	ENST00000349213	-	1800	chr1	235528620	235532571	chr1	235530675	235530676	ENST00000366601	+	1425
chr10	12082678	12086495	chr10	12085022	12085023	ENST00000397053	-	1675	chr10	12109496	12115110	chr10	12110971	12110972	ENST00000263035	+	1450
chr7	43768355	43770304	chr7	43769315	43769316	ENST00000438444	-	1225	chr7	43796606	43800326	chr7	43798279	43798280	ENST00000265523	+	1025
chr12	105499144	105502991	chr12	105501492	105501493	ENST00000332180	+	1625	chr12	105627617	105631044	chr12	105630015	105630016	ENST00000258530	-	1725
chr14	77785710	77794377	chr14	77787226	77787227	ENST00000261534	-	1675	chr14	77836948	77846491	chr14	77843451	77843452	ENST00000216468	-	1825
chr8	124427993	124430634	chr8	124429043	124429044	ENST00000523551	+	1500	chr8	124780278	124783215	chr8	124780696	124780697	ENST00000521166	+	1900
chr16	401335	403838	chr16	402672	402673	ENST00000481769	-	2550	chr17	64960486	64962180	chr17	64961026	64961027	ENST00000262138	+	1875
chr16	401335	403838	chr16	402672	402673	ENST00000481769	-	2550	chr17	64960486	64962180	chr17	64961026	64961027	ENST00000262138	+	1875
chr7	6142905	6144683	chr7	6144515	6144516	ENST00000306177	+	1675	chr7	6522279	6524664	chr7	6523820	6523821	ENST00000436575	-	1275
chr1	235489972	235491777	chr1	235491533	235491534	ENST00000349213	-	1800	chr1	235666507	235669331	chr1	235667780	235667781	ENST00000366600	-	2075
chr8	90766719	90773256	chr8	90769954	90769955	ENST00000519655	-	1550	chr8	90991979	90999179	chr8	90996943	90996944	ENST00000265433	-	1450
chr2	233496783	233498486	chr2	233497938	233497939	ENST00000264059	+	1600	chr2	233560263	233562772	chr2	233562015	233562016	ENST00000373566	+	2050
chr8	82753265	82755662	chr8	82754538	82754539	ENST00000345957	-	1625	chr8	102503401	102505345	chr8	102504660	102504661	ENST00000251808	+	1775
chr10	65025008	65031159	chr10	65029012	65029013	ENST00000489372	-	1925	chr10	65279443	65282149	chr10	65281123	65281124	ENST00000373758	+	1675
chr3	107808659	107810808	chr3	107809871	107809872	ENST00000355354	-	1625	chr3	107939612	107941480	chr3	107941416	107941417	ENST00000264538	-	1450
chr3	15642316	15644744	chr3	15643337	15643338	ENST00000321169	-	750	chr3	15898879	15901511	chr3	15901277	15901278	ENST00000399451	-	2100
chr21	47702151	47710134	chr21	47706210	47706211	ENST00000397708	-	1700	chr21	47741079	47747645	chr21	47744036	47744037	ENST00000359568	+	1625
chr1	193025655	193031465	chr1	193029236	193029237	ENST00000367452	-	1775	chr1	193087281	193093381	chr1	193091147	193091148	ENST00000367435	+	1675
chr21	47705757	47707649	chr21	47706210	47706211	ENST00000397708	-	1700	chr21	47877566	47879114	chr21	47878812	47878813	ENST00000400274	+	1650
chr14	77841182	77844130	chr14	77843451	77843452	ENST00000216468	-	1825	chr14	78173275	78175250	chr14	78174446	78174447	ENST00000557431	+	1200
chr2	200323295	200325807	chr2	200323467	200323468	ENST00000443023	-	1375	chr2	200774154	200776796	chr2	200776029	200776030	ENST00000491721	+	1950
chr2	202645504	202647733	chr2	202645911	202645912	ENST00000264276	-	1325	chr8	90769279	90771454	chr8	90769954	90769955	ENST00000519655	-	1550
chr2	202645504	202647733	chr2	202645911	202645912	ENST00000264276	-	1325	chr8	90769279	90771454	chr8	90769954	90769955	ENST00000519655	-	1550
chr3	155520823	155524412	chr3	155524139	155524140	ENST00000340171	-	975	chr3	155585049	155590112	chr3	155588325	155588326	ENST00000496455	+	2200
chr17	57182605	57184308	chr17	57184281	57184282	ENST00000393066	-	1450	chr5	67510766	67513738	chr5	67511548	67511549	ENST00000521381	+	1825
chr17	57182605	57184308	chr17	57184281	57184282	ENST00000393066	-	1450	chr5	67510766	67513738	chr5	67511548	67511549	ENST00000521381	+	1825
chr12	100532732	100538317	chr12	100536625	100536626	ENST00000279907	-	2575	chr12	100591171	100596309	chr12	100593643	100593644	ENST00000553038	+	1825
chr9	74381025	74385205	chr9	74383799	74383800	ENST00000377044	-	2150	chr9	74523679	74527691	chr9	74525846	74525847	ENST00000377041	-	2075
chr16	75016953	75020842	chr16	75019045	75019046	ENST00000262144	-	1425	chr16	75032358	75036790	chr16	75032928	75032929	ENST00000335325	+	1600
chr21	47743042	47745765	chr21	47744036	47744037	ENST00000359568	+	1625	chr21	47875975	47879914	chr21	47878812	47878813	ENST00000400274	+	1650
chr1	165735066	165739781	chr1	165738416	165738417	ENST00000367881	-	1725	chr1	165794447	165799093	chr1	165796768	165796769	ENST00000367879	+	2025
chr12	125002801	125005405	chr12	125002839	125002840	ENST00000420698	-	1500	chr12	125051517	125053495	chr12	125052134	125052135	ENST00000542565	-	1925
chr11	82609717	82612953	chr11	82612740	82612741	ENST00000525361	+	1550	chr11	82780769	82783670	chr11	82782964	82782965	ENST00000534141	-	1800
chr14	64853586	64859592	chr14	64854749	64854750	ENST00000545908	+	1150	chr14	64968792	64973445	chr14	64971930	64971931	ENST00000555220	-	2050
chr14	64853920	64855626	chr14	64854749	64854750	ENST00000545908	+	1150	chr14	65380962	65383011	chr14	65381203	65381204	ENST00000542227	+	1725
chr7	156684084	156686187	chr7	156685923	156685924	ENST00000353442	-	1875	chr7	156927893	156931656	chr7	156931607	156931608	ENST00000348165	+	2075
chr17	76836153	76837955	chr17	76836968	76836969	ENST00000312010	-	1675	chr2	232062262	232063797	chr2	232063260	232063261	ENST00000349938	+	1475
chr17	76836153	76837955	chr17	76836968	76836969	ENST00000312010	-	1675	chr2	232062262	232063797	chr2	232063260	232063261	ENST00000349938	+	1475
chr3	108307142	108309697	chr3	108308529	108308530	ENST00000361582	+	1600	chr3	113465058	113466971	chr3	113465866	113465867	ENST00000273398	+	1350
chr1	227916225	227917863	chr1	227916358	227916359	ENST00000366760	+	1875	chr2	32234372	32236417	chr2	32236104	32236105	ENST00000490459	-	2175
chr20	50383720	50385389	chr20	50385172	50385173	ENST00000338821	-	2350	chr9	129376315	129377815	chr9	129376722	129376723	ENST00000526117	+	1550
chr20	50383720	50385389	chr20	50385172	50385173	ENST00000338821	-	2350	chr9	129376315	129377815	chr9	129376722	129376723	ENST00000526117	+	1550
chrX	16735838	16739609	chrX	16737755	16737756	ENST00000380155	+	1850	chrX	16803488	16806265	chrX	16804550	16804551	ENST00000380122	+	1225
chr1	227916225	227917863	chr1	227916358	227916359	ENST00000366760	+	1875	chr2	32234372	32236417	chr2	32236104	32236105	ENST00000490459	-	2175
chr10	121629804	121638118	chr10	121633132	121633133	ENST00000466047	-	2100	chr10	121650513	121658744	chr10	121652223	121652224	ENST00000369075	+	1400
chr1	224299141	224303224	chr1	224301789	224301790	ENST00000366862	+	2100	chr1	224514971	224520507	chr1	224518088	224518089	ENST00000281701	-	1750
chr2	153030783	153033861	chr2	153032505	153032506	ENST00000263904	-	1450	chr2	153572629	153575835	chr2	153574494	153574495	ENST00000410080	-	2100
chr5	32172663	32175375	chr5	32174455	32174456	ENST00000265070	-	1625	chr5	32313113	32315144	chr5	32313114	32313115	ENST00000382142	-	1925
chr5	68529081	68531056	chr5	68530700	68530701	ENST00000256443	+	1350	chr5	68663452	68665244	chr5	68665124	68665125	ENST00000361732	+	1400
chr8	54931365	54936825	chr8	54935088	54935089	ENST00000521604	-	2275	chr8	55013053	55016452	chr8	55014576	55014577	ENST00000316963	-	1525
chr1	108740398	108744874	chr1	108742979	108742980	ENST00000565488	-	2000	chr1	109100130	109106117	chr1	109102711	109102712	ENST00000405454	+	1625
chr1	108741161	108744200	chr1	108742979	108742980	ENST00000565488	-	2000	chr1	114469971	114473274	chr1	114471814	114471815	ENST00000426820	+	1975
chr1	108741305	108744649	chr1	108742979	108742980	ENST00000565488	-	2000	chr1	109289020	109291241	chr1	109289310	109289311	ENST00000370008	+	1700
chr5	145559594	145562426	chr5	145562222	145562223	ENST00000394434	-	1475	chr5	145581996	145584629	chr5	145583113	145583114	ENST00000506502	+	2075
chr10	32635251	32637385	chr10	32636145	32636146	ENST00000319778	-	1950	chr2	216876683	216879077	chr2	216878345	216878346	ENST00000263268	-	1925
chr15	52819791	52821534	chr15	52821246	52821247	ENST00000399231	-	1475	chr15	52970285	52973265	chr15	52971568	52971569	ENST00000566768	-	1925
chr12	22695080	22699755	chr12	22697479	22697480	ENST00000333957	-	725	chr12	22776385	22783572	chr12	22778009	22778010	ENST00000266517	+	2275
chr7	148393260	148396579	chr7	148395006	148395007	ENST00000409469	+	2100	chr7	148580474	148583147	chr7	148581412	148581413	ENST00000483012	-	2275
chr12	64796556	64799872	chr12	64798130	64798131	ENST00000332707	+	2125	chr12	64845124	64847065	chr12	64845660	64845661	ENST00000331710	+	1850
chr10	32635251	32637385	chr10	32636145	32636146	ENST00000319778	-	1950	chr2	216876683	216879077	chr2	216878345	216878346	ENST00000263268	-	1925
chr22	29277854	29280834	chr22	29279580	29279581	ENST00000544604	+	2175	chr3	15899899	15902425	chr3	15901277	15901278	ENST00000399451	-	2100
chr22	29277854	29280834	chr22	29279580	29279581	ENST00000544604	+	2175	chr3	15899899	15902425	chr3	15901277	15901278	ENST00000399451	-	2100
chr7	148394094	148396779	chr7	148395006	148395007	ENST00000409469	+	2100	chr7	148822945	148824485	chr7	148823508	148823509	ENST00000426851	+	3950
chr6	125473582	125481050	chr6	125474795	125474796	ENST00000304877	+	2125	chr6	125515701	125532308	chr6	125524785	125524786	ENST00000392482	+	1825
chr17	57695154	57697682	chr17	57697219	57697220	ENST00000393043	+	1650	chr17	57969742	57971925	chr17	57970447	57970448	ENST00000472940	+	2250
chr17	57695156	57700171	chr17	57697219	57697220	ENST00000393043	+	1650	chr17	57781876	57786883	chr17	57784863	57784864	ENST00000262291	+	2125
chr1	117210360	117212069	chr1	117210374	117210375	ENST00000369486	-	1325	chr1	117601105	117603738	chr1	117602925	117602926	ENST00000369466	+	1225
chr12	64845394	64847984	chr12	64845660	64845661	ENST00000331710	+	1850	chr12	65173239	65175891	chr12	65174589	65174590	ENST00000229088	+	1775
chr17	58593607	58613103	chr17	58603579	58603580	ENST00000083182	-	1875	chr17	58668382	58687900	chr17	58677554	58677555	ENST00000305921	+	1975
chr17	58676303	58679751	chr17	58677554	58677555	ENST00000305921	+	1975	chr20	49410370	49413505	chr20	49411431	49411432	ENST00000358791	+	1925
chr17	58676303	58679751	chr17	58677554	58677555	ENST00000305921	+	1975	chr20	49410370	49413505	chr20	49411431	49411432	ENST00000358791	+	1925
chr17	58676308	58677992	chr17	58677554	58677555	ENST00000305921	+	1975	chr8	102503375	102505065	chr8	102504660	102504661	ENST00000251808	+	1775
chr6	116380605	116383513	chr6	116381920	116381921	ENST00000368626	-	1375	chr6	116421121	116424169	chr6	116422012	116422013	ENST00000319550	+	1550
chr6	42419401	42421689	chr6	42419788	42419789	ENST00000372917	-	2075	chr6	42529799	42532340	chr6	42531800	42531801	ENST00000372899	+	1650
chr17	58676308	58677992	chr17	58677554	58677555	ENST00000305921	+	1975	chr8	102503375	102505065	chr8	102504660	102504661	ENST00000251808	+	1775
chr17	58676976	58679344	chr17	58677554	58677555	ENST00000305921	+	1975	chr20	46130334	46132386	chr20	46130601	46130602	ENST00000341724	+	1800
chr1	151429381	151432201	chr1	151431940	151431941	ENST00000271715	-	1900	chr14	21736244	21738881	chr14	21737652	21737653	ENST00000336053	-	1450
chr1	151429381	151432201	chr1	151431940	151431941	ENST00000271715	-	1900	chr14	21736244	21738881	chr14	21737652	21737653	ENST00000336053	-	1450
chr14	35096806	35099646	chr14	35099388	35099389	ENST00000362031	-	1150	chr14	35341739	35344917	chr14	35344852	35344853	ENST00000358716	-	1825
chr20	56285236	56286877	chr20	56286591	56286592	ENST00000472841	-	1800	chr6	111804782	111806517	chr6	111804917	111804918	ENST00000422377	-	1775
chr17	58676976	58679344	chr17	58677554	58677555	ENST00000305921	+	1975	chr20	46130334	46132386	chr20	46130601	46130602	ENST00000341724	+	1800
chr18	158012	160007	chr18	158383	158384	ENST00000582707	+	1450	chr18	265808	268303	chr18	268026	268027	ENST00000261600	-	1375
chr1	151511929	151514676	chr1	151512781	151512782	ENST00000392712	+	1950	chr5	16935884	16938127	chr5	16936371	16936372	ENST00000513610	-	1625
chr1	151511929	151514676	chr1	151512781	151512782	ENST00000392712	+	1950	chr5	16935884	16938127	chr5	16936371	16936372	ENST00000513610	-	1625
chr14	96505197	96507256	chr14	96505661	96505662	ENST00000555004	+	1650	chr14	96828874	96832469	chr14	96830206	96830207	ENST00000359933	-	2100
chr17	61626571	61629865	chr17	61627822	61627823	ENST00000310827	+	2225	chr17	61698715	61701747	chr17	61699775	61699776	ENST00000579585	+	1725
chr20	56285236	56286877	chr20	56286591	56286592	ENST00000472841	-	1800	chr6	111804782	111806517	chr6	111804917	111804918	ENST00000422377	-	1775
chr2	9693170	9697860	chr2	9695916	9695917	ENST00000310823	-	2075	chr2	9768724	9771765	chr2	9771142	9771143	ENST00000238081	-	2125
chr5	77589238	77590910	chr5	77590578	77590579	ENST00000255194	-	1450	chr5	77655000	77657282	chr5	77656339	77656340	ENST00000538629	+	1900
chr8	67521707	67525650	chr8	67525528	67525529	ENST00000517885	-	2075	chr8	67623825	67627698	chr8	67624653	67624654	ENST00000521198	+	1600
chr6	142622193	142623879	chr6	142622991	142622992	ENST00000230173	+	1375	chr6	143265828	143267526	chr6	143266337	143266338	ENST00000367603	-	1800
chr9	95428069	95433526	chr9	95432546	95432547	ENST00000287996	-	1775	chr9	95524054	95531235	chr9	95527093	95527094	ENST00000375512	-	1800
chr11	118661318	118663214	chr11	118661844	118661845	ENST00000264018	-	2025	chr11	119076613	119078213	chr11	119076752	119076753	ENST00000264033	+	1925
chr21	37527867	37529674	chr21	37529080	37529081	ENST00000270190	+	1725	chr21	37692376	37693983	chr21	37692487	37692488	ENST00000400485	+	1975
chr18	9474922	9476536	chr18	9475007	9475008	ENST00000019317	+	2150	chr18	9613527	9616238	chr18	9614566	9614567	ENST00000400555	-	1975
chr8	67523268	67525543	chr8	67525528	67525529	ENST00000517885	-	2075	chr8	67973888	67976833	chr8	67976603	67976604	ENST00000412460	+	1775
chr14	57045312	57048274	chr14	57046338	57046339	ENST00000556422	+	1950	chr14	57733725	57737453	chr14	57735725	57735726	ENST00000413566	-	1700
chr1	151430633	151432391	chr1	151431940	151431941	ENST00000271715	-	1900	chr1	151583582	151586341	chr1	151584541	151584542	ENST00000368841	+	2075
chr9	95431480	95432991	chr9	95432546	95432547	ENST00000287996	-	1775	chr9	96212383	96214894	chr9	96214173	96214174	ENST00000375389	+	1975
chr10	94331601	94334574	chr10	94333832	94333833	ENST00000265986	-	1525	chr10	94607928	94609540	chr10	94608242	94608243	ENST00000371543	+	1625
chr10	94332262	94336114	chr10	94333832	94333833	ENST00000265986	-	1525	chr10	94349834	94354042	chr10	94353043	94353044	ENST00000260731	+	1750
chr8	67574105	67581178	chr8	67579831	67579832	ENST00000520044	+	1550	chr8	67622567	67628099	chr8	67624653	67624654	ENST00000521198	+	1600
chr17	61699084	61701530	chr17	61699775	61699776	ENST00000579585	+	1725	chr17	61849213	61853016	chr17	61851223	61851224	ENST00000578681	+	1375
chr14	35341867	35346512	chr14	35344852	35344853	ENST00000358716	-	1825	chr14	35447191	35456965	chr14	35451163	35451164	ENST00000556994	+	1750
chr3	88106502	88110909	chr3	88108424	88108425	ENST00000473136	+	2175	chr3	88195834	88201659	chr3	88199034	88199035	ENST00000462901	-	1900
chr18	9611182	9615699	chr18	9614566	9614567	ENST00000400555	-	1975	chr18	9705314	9711194	chr18	9708162	9708163	ENST00000578921	+	1875
chr18	9612136	9615353	chr18	9614566	9614567	ENST00000400555	-	1975	chr18	9912435	9915971	chr18	9913999	9914000	ENST00000400000	+	2100
chr16	87798669	87801426	chr16	87799581	87799582	ENST00000347925	-	1150	chr16	87983038	87985922	chr16	87985038	87985039	ENST00000289484	+	950
chr1	167688989	167693506	chr1	167691187	167691188	ENST00000359523	+	1925	chr1	167903725	167907618	chr1	167905021	167905022	ENST00000450548	+	1550
chr2	28973598	28975697	chr2	28974614	28974615	ENST00000358506	+	1825	chr2	29115876	29118421	chr2	29117509	29117510	ENST00000407426	+	2000
chr2	136287217	136292520	chr2	136289025	136289026	ENST00000483021	+	1625	chr2	136497205	136500626	chr2	136499189	136499190	ENST00000272638	+	1825
chr1	151509848	151514263	chr1	151512781	151512782	ENST00000392712	+	1950	chr1	151581077	151585541	chr1	151584541	151584542	ENST00000368841	+	2075
chr14	81686218	81688258	chr14	81687574	81687575	ENST00000434192	-	1750	chr14	81998585	82000595	chr14	82000204	82000205	ENST00000336735	-	1525
chr8	103422495	103425381	chr8	103425068	103425069	ENST00000520539	-	1850	chr8	103875147	103876814	chr8	103876646	103876647	ENST00000520750	+	1850
chr10	89576079	89578102	chr10	89577916	89577917	ENST00000541004	-	1975	chr10	89621664	89623913	chr10	89622870	89622871	ENST00000371953	+	1800
chr20	47661307	47663987	chr20	47662849	47662850	ENST00000262982	+	1750	chr20	47893638	47895557	chr20	47894962	47894963	ENST00000371754	-	1925
chr9	131217143	131221296	chr9	131218408	131218409	ENST00000351030	+	775	chr9	131313605	131316376	chr9	131314866	131314867	ENST00000358161	+	1800
chr14	65451451	65454703	chr14	65453438	65453439	ENST00000246166	+	1175	chr14	65567810	65571977	chr14	65569104	65569105	ENST00000341653	-	1525
chr13	42531843	42538424	chr13	42535255	42535256	ENST00000281496	-	2050	chr13	42612037	42616726	chr13	42614176	42614177	ENST00000540693	+	2425
chr14	100703892	100707800	chr14	100705322	100705323	ENST00000262238	+	2150	chr14	100840547	100844523	chr14	100843141	100843142	ENST00000355338	-	1650
chr1	220218169	220221765	chr1	220219999	220220000	ENST00000366923	-	2775	chr1	220261064	220269153	chr1	220267444	220267445	ENST00000366922	+	1750
chr2	114511479	114519908	chr2	114514399	114514400	ENST00000245680	-	1925	chr2	114641728	114650266	chr2	114647537	114647538	ENST00000263238	+	1775
chr8	67623840	67628206	chr8	67624653	67624654	ENST00000521198	+	1600	chr8	67684536	67689963	chr8	67687449	67687450	ENST00000521960	+	1975
chr8	95728931	95732611	chr8	95732128	95732129	ENST00000414645	+	1200	chr8	95833805	95837140	chr8	95835527	95835528	ENST00000523731	+	1350
chr14	65876592	65878564	chr14	65877310	65877311	ENST00000360689	+	2475	chr6	54710365	54711981	chr6	54711569	54711570	ENST00000306858	+	1750
chr1	244613660	244616290	chr1	244615435	244615436	ENST00000366535	-	1600	chr1	244815370	244817859	chr1	244816237	244816238	ENST00000302550	+	1425
chr10	976566	978917	chr10	977563	977564	ENST00000406525	-	2175	chr20	33411823	33413821	chr20	33413451	33413452	ENST00000359003	-	1975
chr10	976566	978917	chr10	977563	977564	ENST00000406525	-	2175	chr20	33411823	33413821	chr20	33413451	33413452	ENST00000359003	-	1975
chr12	81330594	81332786	chr12	81331703	81331704	ENST00000552864	-	1700	chr12	81470563	81473430	chr12	81470990	81470991	ENST00000548058	+	1925
chr17	4044903	4047666	chr17	4046313	4046314	ENST00000574474	-	2200	chr17	4267641	4270100	chr17	4269922	4269923	ENST00000571980	-	1750
chr14	65876592	65878564	chr14	65877310	65877311	ENST00000360689	+	2475	chr6	54710365	54711981	chr6	54711569	54711570	ENST00000306858	+	1750
chr12	62652867	62655436	chr12	62654119	62654120	ENST00000353364	+	1950	chr12	62859516	62862606	chr12	62860597	62860598	ENST00000393630	+	1950
chr11	63436203	63440489	chr11	63439380	63439381	ENST00000538786	-	2025	chr11	63447864	63452214	chr11	63448918	63448919	ENST00000341307	+	2075
chr10	976647	980794	chr10	977563	977564	ENST00000406525	-	2175	chr10	1093154	1097319	chr10	1095478	1095479	ENST00000358220	+	1825
chr11	63437518	63440264	chr11	63439380	63439381	ENST00000538786	-	2025	chr11	63931610	63934606	chr11	63933577	63933578	ENST00000545464	-	1000
chr8	95834216	95835911	chr8	95835527	95835528	ENST00000523731	+	1350	chr8	97273907	97276044	chr8	97273943	97273944	ENST00000517309	+	1700
chr1	108741167	108745172	chr1	108742979	108742980	ENST00000565488	-	2000	chr17	58677031	58680031	chr17	58677554	58677555	ENST00000305921	+	1975
chr16	84732319	84735082	chr16	84733584	84733585	ENST00000219473	+	1850	chr19	47634055	47635780	chr19	47634080	47634081	ENST00000270225	+	1650
chr5	148928356	148931063	chr5	148931006	148931007	ENST00000377843	-	1875	chr5	149377605	149380570	chr5	149379884	149379885	ENST00000503427	+	2175
chr1	47778595	47781681	chr1	47779818	47779819	ENST00000360380	-	1450	chr1	47798356	47800996	chr1	47799469	47799470	ENST00000371873	+	1175
chr8	95835209	95837028	chr8	95835527	95835528	ENST00000523731	+	1350	chr8	96037260	96039348	chr8	96037296	96037297	ENST00000286687	+	1975
chr3	32021363	32025887	chr3	32022796	32022797	ENST00000452791	-	1450	chr3	32145866	32149490	chr3	32148003	32148004	ENST00000282541	+	1700
chr14	91883508	91885062	chr14	91884120	91884121	ENST00000389857	-	1125	chr14	92301937	92304489	chr14	92302869	92302870	ENST00000556018	-	2100
chr17	1301746	1304361	chr17	1303671	1303672	ENST00000264335	-	2375	chr17	1465342	1467006	chr17	1466109	1466110	ENST00000313486	-	1075
chr16	84732319	84735082	chr16	84733584	84733585	ENST00000219473	+	1850	chr19	47634055	47635780	chr19	47634080	47634081	ENST00000270225	+	1650
chr13	52022285	52029211	chr13	52027342	52027343	ENST00000398119	-	850	chr13	52148229	52167071	chr13	52158644	52158645	ENST00000298125	+	1875
chr17	57969470	57971681	chr17	57970447	57970448	ENST00000472940	+	2250	chr17	58676412	58680192	chr17	58677554	58677555	ENST00000305921	+	1975
chr17	57969541	57971817	chr17	57970447	57970448	ENST00000472940	+	2250	chr17	58468489	58470142	chr17	58469585	58469586	ENST00000300896	-	1075
chr1	117601498	117604071	chr1	117602925	117602926	ENST00000369466	+	1225	chr1	117908124	117910582	chr1	117910071	117910072	ENST00000356554	+	2175
chr4	106066586	106070319	chr4	106067032	106067033	ENST00000305737	+	2050	chr4	106392729	106397085	chr4	106395237	106395238	ENST00000341695	-	1075
chr1	179922809	179925375	chr1	179923873	179923874	ENST00000367607	+	2175	chr1	180469288	180472844	chr1	180472088	180472089	ENST00000367595	-	2050
chrX	21857611	21860003	chrX	21857754	21857755	ENST00000379484	+	1575	chrX	21956864	21959444	chrX	21958691	21958692	ENST00000404933	+	1675
chr9	90994361	91017144	chr9	91003334	91003335	ENST00000375859	+	1900	chr9	91141314	91159254	chr9	91150020	91150021	ENST00000487646	+	1875
chr20	47802963	47805277	chr20	47804903	47804904	ENST00000347458	-	2275	chr20	47893491	47896706	chr20	47894962	47894963	ENST00000371754	-	1925
chr6	82955904	82959365	chr6	82957470	82957471	ENST00000369751	-	775	chr6	83770959	83775614	chr6	83775559	83775560	ENST00000369747	-	1325
chr17	1464380	1467507	chr17	1466109	1466110	ENST00000313486	-	1075	chr17	1529822	1533209	chr17	1532179	1532180	ENST00000574743	-	1775
