# Supplementary material for: Rate of elongation by RNA polymerase II is associated with specific gene features and epigenetic modifications
Source: HighWire-hosted journal article supplement (doi:10.1101/gr.171405.113), 2014-04-08
Supplement: Supplemental_Table_Legends.docx [file Supplemental_Table_Legends.docx]

**Supplemental Table Legends**

**Supplemental Table 1**: Elongation rate calculated for the 3 state analysis (bp/min) and transcript expression (RPKM) measured in the Bru-seq sample. NA is used to designate transcripts that were not analyzed in a cell line.

**Supplemental Table 2**: Gene Set Enrichment Analysis results for gene sets that were significantly enriched in at least three of the five cell lines. For each cell line, the normalized enrichment score (NES) is provided. NA is used to designate gene sets that were not tested in a given cell line (e.g. there were not enough transcripts that belonged to that gene set expressed in that cell line). NS is used to designate gene sets that did not present statistically significant results. Sheets 2-5: The gene lists of the four enriched pathways are shown indicating which genes that are enriched for each core pathway.

**Supplemental Table 3:** Feature measurements for the five cell lines (separated by sheets). The measurements are provided as densities (e.g. number of exons divided by total elongation) or as complete measurements (e.g. transcript length). NA is used to designate features that were not present in a given transcript.

**Supplemental Table 4:** Results of the permutation analysis carried out to determine correlation between elongation rate and features. For each cell line it is displayed: the observed correlation coefficient, the median permutation correlation coefficient, the corrected correlation coefficient and the FDR adjusted p-value. NA is used to designate features that were not analyzed in a given cell line.

**Supplemental Table 5:** Data for the correlation of elongation rates of a given transcript and its closest neighbor for which an elongation rate was measured. The data for each cell line is provided in a different sheet.

**Supplemental Table 6:** Data for the correlation of elongation rates from pairs of transcripts that presented physical proximity of Transcription Start Sites according to ChIA-PET. Data for K562 and MCF-7 (two replicates each) are provided in different sheets.
